# Supplementary material for: Comprehensive Identification and Characterization of Human Secretome Based on Integrative Proteomic and Transcriptomic Data
Source: Front Cell Dev Biol. 2019 Nov 21;7:299. doi: 10.3389/fcell.2019.00299 (PMC6881247; doi:10.3389/fcell.2019.00299)
Supplement: Supplementary file 1 [file Table_1.xlsx]

## Sheet: Supplementary Table 1
Supplementary Table 1: GSSPs from Swiss-Prot database
Entry	Gene name	Gene ontology IDs	Protein existence	Subcellular location [CC]	Intramembrane	Transmembrane	Signal peptide	Transit peptide
P01009	SERPINA1	GO:0048208; GO:0030134; GO:0006888; GO:0005794; GO:0000139; GO:0006953; GO:0007596; GO:0005783; GO:0005788; GO:0033116; GO:0070062; GO:0005576; GO:0005615; GO:0001948; GO:0042802; GO:0031093; GO:0002576; GO:0002020; GO:0005578; GO:0004867	Evidence at protein level	SUBCELLULAR LOCATION: Secreted. Endoplasmic reticulum. Note=The S and Z allele are not secreted effectively and accumulate intracellularly in the endoplasmic reticulum.; SUBCELLULAR LOCATION: Short peptide from AAT: Secreted, extracellular space, extracellular matrix.			SIGNAL 1 24 {ECO:0000269|PubMed:1906855}.
P02763	ORM1	GO:0006953; GO:0072562; GO:0070062; GO:0005576; GO:0005615; GO:0006954; GO:0032715; GO:0032720; GO:0031093; GO:0002576; GO:0002682	Evidence at protein level	SUBCELLULAR LOCATION: Secreted.			SIGNAL 1 18 {ECO:0000269|PubMed:4711474}.
P05408	SCG5	GO:0005525; GO:0004857; GO:0005576; GO:0006886; GO:0007218; GO:0016486; GO:0046883; GO:0030141; GO:0051082	Evidence at protein level	SUBCELLULAR LOCATION: Secreted. Note=Neuroendocrine and endocrine secretory granules.			SIGNAL 1 26 {ECO:0000269|PubMed:6625600}.
P04217	A1BG	GO:0072562; GO:0070062; GO:0005576; GO:0005615; GO:0031093; GO:0002576	Evidence at protein level	SUBCELLULAR LOCATION: Secreted.			SIGNAL 1 21 {ECO:0000269|PubMed:3458201}.
Q5VST6	ABHD17B	GO:0005576; GO:0016787; GO:0016020	Evidence at protein level	SUBCELLULAR LOCATION: Secreted {ECO:0000305}.			SIGNAL 1 20 {ECO:0000255}.
P19652	ORM2	GO:0006953; GO:0072562; GO:0070062; GO:0005576; GO:0005615; GO:0031093; GO:0002576; GO:0002682	Evidence at protein level	SUBCELLULAR LOCATION: Secreted.			SIGNAL 1 18
P08697	SERPINF2	GO:0006953; GO:0072562; GO:0048514; GO:0009986; GO:0030199; GO:0004866; GO:0070062; GO:0005576; GO:0005615; GO:0005577; GO:0042730; GO:0051918; GO:0010757; GO:0031093; GO:0002576; GO:0070374; GO:0046330; GO:0045597; GO:2000049; GO:0032967; GO:0048661; GO:0051496; GO:0045944; GO:0071636; GO:0002020; GO:0042803; GO:0002034; GO:0010033; GO:0004867	Evidence at protein level	SUBCELLULAR LOCATION: Secreted.			SIGNAL 1 27 {ECO:0000269|PubMed:1385210, ECO:0000269|PubMed:8484741}.
P01023	A2M	GO:0005096; GO:0007597; GO:0072562; GO:0048306; GO:0005829; GO:0019899; GO:0070062; GO:0022617; GO:0005576; GO:0019838; GO:0019966; GO:0019959; GO:0001869; GO:0031093; GO:0002576; GO:0002020; GO:0005102; GO:0051056; GO:0004867; GO:0048863; GO:0043120	Evidence at protein level	SUBCELLULAR LOCATION: Secreted {ECO:0000269|PubMed:6203908}.			SIGNAL 1 23 {ECO:0000269|PubMed:6203908}.
Q96GS6	ABHD17A	GO:0005576; GO:0016787; GO:0016020	Evidence at protein level	SUBCELLULAR LOCATION: Secreted {ECO:0000305}.			SIGNAL 1 20 {ECO:0000255}.
Q9BRR6	ADPGK	GO:0043843; GO:0005783; GO:0005576; GO:0006006; GO:0006096; GO:0016020; GO:0046872	Evidence at protein level	SUBCELLULAR LOCATION: Secreted {ECO:0000305}.			SIGNAL 1 22 {ECO:0000255}.
P02750	LRG1	GO:0050873; GO:0070062; GO:0005576; GO:0005615; GO:0016020; GO:0045766; GO:0001938; GO:0030511	Evidence at protein level	SUBCELLULAR LOCATION: Secreted.			SIGNAL 1 35 {ECO:0000269|PubMed:3856868}.
A8K2U0	A2ML1	GO:0070062; GO:0005615; GO:0030414; GO:0052548; GO:0004867	Evidence at protein level	SUBCELLULAR LOCATION: Secreted {ECO:0000269|PubMed:16298998}.			SIGNAL 1 17 {ECO:0000255}.
P01011	SERPINA3	GO:0003677; GO:0006953; GO:0072562; GO:0070062; GO:0005576; GO:0005615; GO:0006954; GO:0005622; GO:0030277; GO:0005634; GO:0031093; GO:0002576; GO:0019216; GO:0004867	Evidence at protein level	SUBCELLULAR LOCATION: Secreted.			SIGNAL 1 23 {ECO:0000269|PubMed:2787670}.
Q6UXT9	ABHD15	GO:0005576; GO:0016787; GO:0016020	Evidence at protein level	SUBCELLULAR LOCATION: Secreted {ECO:0000305}.			SIGNAL 1 23 {ECO:0000255}.
O00253	AGRP	GO:0005796; GO:0008343; GO:0007623; GO:0042755; GO:0070062; GO:0005615; GO:0007631; GO:0009755; GO:0060135; GO:0043025; GO:0005184; GO:0007218; GO:0009648; GO:2000253; GO:0005102; GO:0060259; GO:0032868	Evidence at protein level	SUBCELLULAR LOCATION: Secreted {ECO:0000269|PubMed:15927146}. Golgi apparatus lumen {ECO:0000269|PubMed:15927146}.			SIGNAL 1 20 {ECO:0000255}.
Q15848	ADIPOQ	GO:0033211; GO:0050873; GO:0009986; GO:0071320; GO:0035690; GO:0071872; GO:0032869; GO:0007623; GO:0005581; GO:0005125; GO:0070994; GO:0005783; GO:0070062; GO:0005576; GO:0005615; GO:0006635; GO:0019395; GO:0006091; GO:0042593; GO:0006006; GO:0005179; GO:0042802; GO:0034383; GO:0051899; GO:0060081; GO:2000279; GO:0070373; GO:0043124; GO:0043407; GO:0045776; GO:0030336; GO:0045599; GO:0045721; GO:…	Evidence at protein level	SUBCELLULAR LOCATION: Secreted.			SIGNAL 1 18 {ECO:0000269|PubMed:15340161, ECO:0000269|PubMed:8947845}.
P43652	AFM	GO:0072562; GO:0070062; GO:0005576; GO:0005615; GO:0008431; GO:0051180	Evidence at protein level	SUBCELLULAR LOCATION: Secreted.			SIGNAL 1 21 {ECO:0000269|PubMed:15952736}.
O00468	AGRN	GO:0007213; GO:0005796; GO:0005605; GO:0005509; GO:0030054; GO:0035374; GO:0045162; GO:0005737; GO:0002162; GO:0070062; GO:0031012; GO:0030198; GO:0005576; GO:0006024; GO:0006027; GO:0030203; GO:0043395; GO:0016021; GO:0043236; GO:0043202; GO:0005886; GO:0043547; GO:0051491; GO:0045887; GO:0045944; GO:0043113; GO:0001523; GO:0033691; GO:0007165; GO:0005200; GO:0045202; GO:0050808	Evidence at protein level	SUBCELLULAR LOCATION: Isoform 1: Secreted, extracellular space, extracellular matrix {ECO:0000269|PubMed:20551380}. Note=Synaptic basal lamina at the neuromuscular junction. {ECO:0000250|UniProtKB:P31696}.; SUBCELLULAR LOCATION: Isoform 2: Cell junction, synapse {ECO:0000250|UniProtKB:A2ASQ1}. Cell membrane {ECO:0000250|UniProtKB:A2ASQ1}; Single-pass type II membrane protein {ECO:0000250|UniProtK…			SIGNAL 1 29 {ECO:0000255}.
Q99217	AMELX	GO:0031214; GO:0007155; GO:0008283; GO:0009986; GO:0002062; GO:0070166; GO:0001837; GO:0008083; GO:0046848; GO:0042802; GO:0050801; GO:0042475; GO:0001649; GO:0032967; GO:0070172; GO:0005578; GO:0007165; GO:0030345; GO:0034505	Evidence at protein level	SUBCELLULAR LOCATION: Secreted, extracellular space, extracellular matrix.			SIGNAL 1 16 {ECO:0000269|PubMed:2509010}.
O15204	ADAMDEC1	GO:0005576; GO:0006955; GO:0004222; GO:0007162; GO:0008270	Evidence at protein level	SUBCELLULAR LOCATION: Secreted {ECO:0000250}.			SIGNAL 1 30 {ECO:0000255}.
P16860	NPPB	GO:0007589; GO:0006182; GO:0007166; GO:0008613; GO:0005576; GO:0005615; GO:0005179; GO:0016525; GO:0030308; GO:0035815; GO:0035810; GO:0043234; GO:0005102; GO:0007168; GO:0008217; GO:0043114; GO:0042312	Evidence at protein level	SUBCELLULAR LOCATION: Secreted.			SIGNAL 1 26 {ECO:0000269|PubMed:2138890}.
P23582	NPPC	GO:0006182; GO:0005576; GO:0005615; GO:0003418; GO:0003419; GO:0051053; GO:0008285; GO:0051447; GO:1900194; GO:0001503; GO:0030828; GO:0045669; GO:0045909; GO:0009791; GO:0005102; GO:0007168; GO:0030814; GO:0030823; GO:1903779; GO:0040014; GO:0048660; GO:0042493; GO:0045471; GO:0001666; GO:0030141; GO:0044702	Evidence at protein level	SUBCELLULAR LOCATION: Secreted.			SIGNAL 1 23 {ECO:0000255}.
Q9BY76	ANGPTL4	GO:0001525; GO:0072562; GO:0030154; GO:0004857; GO:0005576; GO:0005615; GO:0042802; GO:0043066; GO:2000352; GO:0051005; GO:0045766; GO:0051260; GO:0005578; GO:0001666; GO:0070328	Evidence at protein level	SUBCELLULAR LOCATION: Secreted {ECO:0000269|PubMed:10698685}. Secreted, extracellular space, extracellular matrix {ECO:0000250}. Note=The unprocessed form interacts with the extracellular matrix. This may constitute a dynamic reservoir, a regulatory mechanism of the bioavailability of ANGPTL4 (By similarity). {ECO:0000250}.			SIGNAL 1 25 {ECO:0000255}.
Q5T7M4	C1QTNF12	GO:0005576; GO:0005615; GO:0005179; GO:0045721; GO:0050728; GO:0046326; GO:0046628; GO:0035774; GO:0051897; GO:0046324	Evidence at protein level	SUBCELLULAR LOCATION: Adipolin fCTRP12: Secreted.; SUBCELLULAR LOCATION: Adipolin gCTRP12: Secreted.			SIGNAL 1 20 {ECO:0000255}.
P35318	ADM	GO:0002031; GO:0007568; GO:0008209; GO:0019731; GO:0008015; GO:0060670; GO:0006171; GO:0019933; GO:0007267; GO:0005737; GO:0005829; GO:0050829; GO:0050830; GO:0048589; GO:0005576; GO:0005615; GO:0007565; GO:0007507; GO:0046879; GO:0008285; GO:0043116; GO:0045906; GO:0001843; GO:0031102; GO:0042475; GO:0031100; GO:0045766; GO:0043065; GO:0030819; GO:0008284; GO:0007204; GO:0010460; GO:2001214; GO:…	Evidence at protein level	SUBCELLULAR LOCATION: Secreted.			SIGNAL 1 21 {ECO:0000250|UniProtKB:P53366}.
O95994	AGR2	GO:0048546; GO:0002162; GO:0005783; GO:0005154; GO:0005615; GO:0060480; GO:0005739; GO:0070254; GO:0060548; GO:1903896; GO:1903899; GO:0010811; GO:0048639; GO:0045742; GO:0090004; GO:0010628; GO:0042803	Evidence at protein level	SUBCELLULAR LOCATION: Secreted {ECO:0000269|PubMed:15834940}. Endoplasmic reticulum {ECO:0000250}.			SIGNAL 1 20 {ECO:0000269|PubMed:15340161}.
P01019	AGT	GO:0070371; GO:0007186; GO:0007199; GO:0007202; GO:0007568; GO:0002003; GO:0038166; GO:0003051; GO:0014824; GO:0072562; GO:0001974; GO:0035411; GO:0061049; GO:0007166; GO:0007267; GO:0071260; GO:0006883; GO:0050663; GO:0005737; GO:0070062; GO:0005576; GO:0005615; GO:0007565; GO:0048144; GO:0008083; GO:0005179; GO:0001822; GO:0034374; GO:0016525; GO:0030308; GO:0010629; GO:0051387; GO:2000650; GO:…	Evidence at protein level	SUBCELLULAR LOCATION: Secreted.			SIGNAL 1 33 {ECO:0000269|PubMed:4300938, ECO:0000269|PubMed:7259779, ECO:0000269|PubMed:7539791}.
Q8IUX7	AEBP1	GO:0000977; GO:0004180; GO:0005737; GO:0070062; GO:0005615; GO:0004181; GO:0007517; GO:0000122; GO:0005634; GO:0006518; GO:0016485; GO:0004185; GO:0001501; GO:0003714; GO:0003700; GO:0006351; GO:0001227; GO:0008270	Evidence at protein level	SUBCELLULAR LOCATION: Isoform 1: Secreted {ECO:0000250|UniProtKB:Q640N1}.; SUBCELLULAR LOCATION: Isoform 2: Cytoplasm {ECO:0000250|UniProtKB:Q640N1}. Nucleus {ECO:0000250|UniProtKB:Q640N1}.			SIGNAL 1 25 {ECO:0000255}.
P02760	AMBP	GO:0019862; GO:0072562; GO:0019855; GO:0046904; GO:0007155; GO:0009986; GO:0070062; GO:0005576; GO:0005615; GO:0007565; GO:0020037; GO:0042167; GO:0043231; GO:0046329; GO:0050777; GO:0005886; GO:0030163; GO:0042803; GO:0018298; GO:0006898; GO:0004867; GO:0036094; GO:0016032	Evidence at protein level	SUBCELLULAR LOCATION: Secreted.			SIGNAL 1 19 {ECO:0000269|PubMed:6164372, ECO:0000269|PubMed:6198962, ECO:0000269|Ref.12}.
Q9Y5C1	ANGPTL3	GO:0005794; GO:0055090; GO:0001525; GO:0048844; GO:0009986; GO:0007160; GO:0042632; GO:0008203; GO:0005769; GO:0004857; GO:0005615; GO:0006631; GO:0006071; GO:0008083; GO:0008201; GO:0005178; GO:0007229; GO:0030027; GO:0055088; GO:0019915; GO:0051005; GO:0010519; GO:0004859; GO:0009395; GO:0055091; GO:0006644; GO:0045766; GO:0030335; GO:0050996; GO:0009725; GO:0007165; GO:0070328	Evidence at protein level	SUBCELLULAR LOCATION: Secreted {ECO:0000250, ECO:0000305|PubMed:11877390}. Cell projection, lamellipodium {ECO:0000250|UniProtKB:Q9R182}. Note=Colocalized with HSPG2 and activated ITGB3 on podocytes. {ECO:0000250|UniProtKB:Q9R182}.			SIGNAL 1 16 {ECO:0000269|PubMed:15340161}.
O15123	ANGPT2	GO:0048014; GO:0001525; GO:0042995; GO:0071363; GO:0005576; GO:0005615; GO:0007281; GO:0072012; GO:0050900; GO:0060135; GO:0046872; GO:0016525; GO:0043537; GO:0010812; GO:0050928; GO:0005634; GO:0031100; GO:0005886; GO:0045766; GO:0005102; GO:0030971; GO:0014823; GO:0009749; GO:0001666; GO:0009612; GO:0014070; GO:0009314; GO:0007165	Evidence at protein level	SUBCELLULAR LOCATION: Secreted.			SIGNAL 1 18 {ECO:0000255}.
P02656	APOC3	GO:0007186; GO:0071333; GO:0015485; GO:0033344; GO:0042632; GO:0042627; GO:0034382; GO:0005769; GO:0030234; GO:0070062; GO:0005576; GO:0005615; GO:0070653; GO:0034375; GO:0006954; GO:0034363; GO:0055102; GO:0042157; GO:0042953; GO:0060621; GO:0045717; GO:0010987; GO:0050995; GO:0045833; GO:0051005; GO:0010989; GO:0090324; GO:0048261; GO:0010897; GO:0010916; GO:0010903; GO:0005543; GO:0033700; GO:…	Evidence at protein level	SUBCELLULAR LOCATION: Secreted {ECO:0000303|PubMed:18201179, ECO:0000303|PubMed:22510806}.			SIGNAL 1 20 {ECO:0000269|PubMed:3949020, ECO:0000269|PubMed:4846755}.
P02768	ALB	GO:0003677; GO:0005794; GO:0016209; GO:0005604; GO:0015721; GO:0072562; GO:0009267; GO:0051087; GO:0005507; GO:0008144; GO:0005783; GO:0070062; GO:0005576; GO:0005615; GO:0005504; GO:0019836; GO:0042802; GO:0042157; GO:0051659; GO:0043209; GO:0043066; GO:0043069; GO:0005634; GO:0031093; GO:0002576; GO:0046010; GO:0043234; GO:0030170; GO:0006898; GO:0046689; GO:0007584; GO:0010033; GO:0070541; GO:…	Evidence at protein level	SUBCELLULAR LOCATION: Secreted.			SIGNAL 1 18
P01160	NPPA	GO:0006182; GO:0014898; GO:0061049; GO:0044267; GO:0071260; GO:0005576; GO:0005615; GO:0007565; GO:0042629; GO:0030308; GO:1903815; GO:0003085; GO:0005184; GO:0071855; GO:0007218; GO:0005634; GO:0048471; GO:0060452; GO:1902261; GO:0010460; GO:1903766; GO:0005102; GO:0007168; GO:0060372; GO:0008217; GO:0050880; GO:1902514; GO:1903779; GO:1901841; GO:0001666; GO:0032868; GO:0035994; GO:0006367	Evidence at protein level	SUBCELLULAR LOCATION: Secreted.			SIGNAL 1 25 {ECO:0000250|UniProtKB:P24259}.
Q6UXH0	ANGPTL8	GO:0048469; GO:0044255; GO:0005576; GO:0045444; GO:0005179; GO:0010954; GO:0019216; GO:0050746; GO:0070328; GO:0044342	Evidence at protein level	SUBCELLULAR LOCATION: Secreted {ECO:0000269|PubMed:23150577, ECO:0000269|PubMed:23623304}.			SIGNAL 1 21 {ECO:0000255}.
Q15389	ANGPT1	GO:0000165; GO:0005088; GO:0048014; GO:0007171; GO:0030154; GO:0031589; GO:0070062; GO:0005576; GO:0005615; GO:0072012; GO:0030097; GO:0030210; GO:0001701; GO:0005622; GO:0050900; GO:0045121; GO:0005902; GO:0043066; GO:0007162; GO:0002740; GO:2000352; GO:0043524; GO:0042308; GO:0001933; GO:0043116; GO:0005886; GO:0050918; GO:0070374; GO:0043536; GO:0045785; GO:0010595; GO:0033138; GO:0050731; GO:…	Evidence at protein level	SUBCELLULAR LOCATION: Secreted.			SIGNAL 1 15 {ECO:0000255}.
P02652	APOA2	GO:0002526; GO:0034190; GO:0072562; GO:0015485; GO:0033344; GO:0042632; GO:0008203; GO:0017127; GO:0042627; GO:0005829; GO:0046340; GO:0005769; GO:0005788; GO:0070062; GO:0005576; GO:0034364; GO:0034380; GO:0008035; GO:0034384; GO:0070653; GO:0034375; GO:0055102; GO:0008289; GO:0005319; GO:0042158; GO:0042157; GO:0034374; GO:0060621; GO:0032375; GO:0060695; GO:0002740; GO:0060192; GO:0050995; GO:…	Evidence at protein level	SUBCELLULAR LOCATION: Secreted {ECO:0000269|PubMed:24116940}.			SIGNAL 1 18 {ECO:0000269|PubMed:6328445}.
P06727	APOA4	GO:0016209; GO:0072562; GO:0044267; GO:0015485; GO:0006695; GO:0033344; GO:0042632; GO:0008203; GO:0017127; GO:0042627; GO:0034378; GO:0034371; GO:0005507; GO:0005829; GO:0005769; GO:0005788; GO:0070062; GO:0005576; GO:0005615; GO:0034364; GO:0034380; GO:0034375; GO:0042744; GO:0002227; GO:0007159; GO:0008289; GO:0055088; GO:0006869; GO:0005319; GO:0042158; GO:0042157; GO:0044240; GO:0034445; GO:…	Evidence at protein level	SUBCELLULAR LOCATION: Secreted.			SIGNAL 1 20 {ECO:0000269|PubMed:6706947}.
Q6Q788	APOA5	GO:0055090; GO:0072562; GO:0015485; GO:0006695; GO:0033344; GO:0042632; GO:0017127; GO:0042627; GO:0008047; GO:0019899; GO:0005576; GO:0005615; GO:0008201; GO:0034364; GO:0034380; GO:0060229; GO:0035473; GO:0008289; GO:0006869; GO:0060230; GO:0042157; GO:0070325; GO:0050750; GO:0031102; GO:0031210; GO:0046470; GO:0060228; GO:0005543; GO:0033700; GO:0010873; GO:0045723; GO:0050996; GO:0051006; GO:…	Evidence at protein level	SUBCELLULAR LOCATION: Secreted {ECO:0000269|PubMed:12810715}.			SIGNAL 1 23 {ECO:0000255}.
P02655	APOC2	GO:0033344; GO:0042632; GO:0042627; GO:0034382; GO:0034371; GO:0005769; GO:0070062; GO:0005576; GO:0005615; GO:0034384; GO:0034363; GO:0055102; GO:0008289; GO:0016042; GO:0060230; GO:0042157; GO:0034362; GO:0032375; GO:0045833; GO:0048261; GO:0010916; GO:0016004; GO:0043274; GO:0033700; GO:0045723; GO:0051006; GO:0010518; GO:0060697; GO:0010898; GO:0010902; GO:0042803; GO:0001523; GO:0043691; GO:…	Evidence at protein level	SUBCELLULAR LOCATION: Secreted {ECO:0000269|PubMed:3525527}.			SIGNAL 1 22 {ECO:0000269|PubMed:194244, ECO:0000269|PubMed:6706938}.
P35858	IGFALS	GO:0007155; GO:0044267; GO:0070062; GO:0005576; GO:0005615; GO:0005520; GO:0042567; GO:0005654; GO:0007165	Evidence at protein level	SUBCELLULAR LOCATION: Secreted, extracellular space.			SIGNAL 1 27 {ECO:0000269|PubMed:2473065}.
P04746	AMY2A	GO:0004556; GO:0005509; GO:0016052; GO:0005975; GO:0031404; GO:0070062; GO:0005576; GO:0005615; GO:0044245	Evidence at protein level	SUBCELLULAR LOCATION: Secreted, extracellular space.			SIGNAL 1 15
P03950	ANG	GO:0003677; GO:0003779; GO:0030041; GO:0032431; GO:0007202; GO:0032148; GO:0034332; GO:0001525; GO:0032311; GO:0019731; GO:0019732; GO:0005605; GO:0007154; GO:0016477; GO:0005507; GO:0016023; GO:0050830; GO:0006651; GO:0004519; GO:0070062; GO:0005576; GO:0005615; GO:0030426; GO:0008201; GO:0042592; GO:0045087; GO:0048662; GO:0017148; GO:0043025; GO:0005730; GO:0005634; GO:0001556; GO:0001541; GO:…	Evidence at protein level	SUBCELLULAR LOCATION: Cytoplasmic vesicle, secretory vesicle lumen {ECO:0000250|UniProtKB:Q3TMQ6}. Secreted {ECO:0000250|UniProtKB:P10152}. Nucleus {ECO:0000269|PubMed:12051708, ECO:0000269|PubMed:25372031}. Nucleus, nucleolus {ECO:0000269|PubMed:7945327}. Note=Rapidly endocytosed by target cells and translocated to the nucleus where it accumulates in the nucleolus and binds to DNA (PubMed:120517…			SIGNAL 1 24 {ECO:0000269|PubMed:2866794}.
P02647	APOA1	GO:0007186; GO:0030325; GO:0034191; GO:0034190; GO:0001540; GO:0072562; GO:0043534; GO:0009986; GO:0044267; GO:0045499; GO:0015485; GO:0006695; GO:0033344; GO:0042632; GO:0070508; GO:0008203; GO:0030301; GO:0017127; GO:0042627; GO:0031410; GO:0005829; GO:0034365; GO:0005769; GO:0030139; GO:0071682; GO:0005788; GO:0001935; GO:0019899; GO:0070062; GO:0005576; GO:0005615; GO:1903561; GO:0008211; GO:…	Evidence at protein level	SUBCELLULAR LOCATION: Secreted.			SIGNAL 1 18 {ECO:0000269|PubMed:6328445, ECO:0000269|PubMed:6409108}.
Q6UX39	AMTN	GO:0005605; GO:0031214; GO:0007155; GO:0005911; GO:0042475; GO:0070169; GO:0070175; GO:0005578	Evidence at protein level	SUBCELLULAR LOCATION: Secreted {ECO:0000250|UniProtKB:Q9D3J8}.			SIGNAL 1 16 {ECO:0000269|PubMed:15340161}.
P04745	AMY1A	GO:0004556; GO:0005975; GO:0007586; GO:0070062; GO:0005615; GO:0046872	Evidence at protein level	SUBCELLULAR LOCATION: Secreted.			SIGNAL 1 15 {ECO:0000255}.
P05090	APOD	GO:0007568; GO:0001525; GO:0007420; GO:0015485; GO:0022626; GO:0030425; GO:0005783; GO:0070062; GO:0005576; GO:0005615; GO:0006006; GO:0006629; GO:0005319; GO:2000405; GO:1900016; GO:0051895; GO:0060588; GO:0071638; GO:0010642; GO:0042308; GO:0048662; GO:2000098; GO:0043025; GO:0048471; GO:0014012; GO:0048678; GO:0042493; GO:0000302; GO:0042246	Evidence at protein level	SUBCELLULAR LOCATION: Secreted.			SIGNAL 1 20 {ECO:0000269|PubMed:7918467}.
P02749	APOH	GO:0007568; GO:0007597; GO:0009986; GO:0042627; GO:0070062; GO:0005576; GO:0005615; GO:0001948; GO:0008201; GO:0034364; GO:0042802; GO:0008289; GO:0060230; GO:0016525; GO:0030195; GO:0010596; GO:0001937; GO:0051918; GO:0033033; GO:0060268; GO:0034392; GO:0031100; GO:0005543; GO:0005886; GO:0031639; GO:0002576; GO:0031089; GO:0030194; GO:0051006; GO:0010898; GO:0051917; GO:0034014; GO:0006641; GO:…	Evidence at protein level	SUBCELLULAR LOCATION: Secreted.			SIGNAL 1 19 {ECO:0000269|PubMed:11250549, ECO:0000269|PubMed:1602135, ECO:0000269|PubMed:2349221, ECO:0000269|PubMed:6587378}.
O43827	ANGPTL7	GO:0005576; GO:0006979	Evidence at protein level	SUBCELLULAR LOCATION: Secreted {ECO:0000305}.			SIGNAL 1 26 {ECO:0000269|PubMed:15340161}.
Q9Y264	ANGPT4	GO:0007219; GO:0001525; GO:0071456; GO:0005576; GO:0005615; GO:0050900; GO:0016525; GO:0043066; GO:0043537; GO:0045766; GO:0043536; GO:0010595; GO:0050731; GO:0030971; GO:0030297	Evidence at protein level	SUBCELLULAR LOCATION: Secreted {ECO:0000305}.			SIGNAL 1 24 {ECO:0000255}.
P01008	SERPINC1	GO:0007596; GO:0072562; GO:0070062; GO:0005576; GO:0005615; GO:0008201; GO:0050728; GO:0005886; GO:0002020; GO:2000266; GO:0007584; GO:0004867	Evidence at protein level	SUBCELLULAR LOCATION: Secreted, extracellular space.			SIGNAL 1 32 {ECO:0000269|Ref.10}.
Q13790	APOF	GO:0015485; GO:0008203; GO:0005576; GO:0034364; GO:0006629; GO:0006869; GO:0005319; GO:0034362; GO:0005102	Evidence at protein level	SUBCELLULAR LOCATION: Secreted.			SIGNAL 1 35 {ECO:0000255}.
P04114	APOB	GO:0005794; GO:0015629; GO:0048844; GO:0044257; GO:0071379; GO:0071356; GO:0033344; GO:0042632; GO:0008203; GO:0030301; GO:0017127; GO:0042627; GO:0034360; GO:0030669; GO:0005737; GO:0005829; GO:0005769; GO:0071682; GO:0005788; GO:0005789; GO:0031904; GO:0010008; GO:0070062; GO:0005576; GO:0005615; GO:0009566; GO:0008201; GO:0001701; GO:0034363; GO:0043231; GO:0050900; GO:0035473; GO:0042158; GO:…	Evidence at protein level	SUBCELLULAR LOCATION: Cytoplasm {ECO:0000269|PubMed:22580899}. Secreted {ECO:0000269|PubMed:22580899, ECO:0000269|PubMed:26224785}.			SIGNAL 1 27
P02649	APOE	GO:0097113; GO:0007186; GO:0005794; GO:0097114; GO:0016209; GO:0048844; GO:0001540; GO:0072562; GO:0019934; GO:0006874; GO:0015485; GO:0006707; GO:0033344; GO:0042632; GO:0008203; GO:0017127; GO:0042627; GO:0034382; GO:0005737; GO:0007010; GO:0030425; GO:0005769; GO:0071682; GO:0005783; GO:0070062; GO:0031012; GO:0005576; GO:0005615; GO:1903561; GO:0055089; GO:0008201; GO:0034364; GO:0034380; GO:…	Evidence at protein level	SUBCELLULAR LOCATION: Secreted {ECO:0000303|PubMed:3283935}.			SIGNAL 1 18 {ECO:0000269|PubMed:7068630}.
P28039	AOAH	GO:0050528; GO:0003824; GO:0005576; GO:0006954; GO:0006629; GO:0004465	Evidence at protein level	SUBCELLULAR LOCATION: Secreted.			SIGNAL 1 23 {ECO:0000255}.
P19801	AOC1	GO:0009308; GO:0005923; GO:0005509; GO:0097185; GO:0071280; GO:0035874; GO:0071504; GO:0071420; GO:0005507; GO:0052597; GO:0008144; GO:0070062; GO:0005615; GO:0008201; GO:0052598; GO:0052599; GO:0055114; GO:0005777; GO:0005886; GO:0008131; GO:0052600; GO:0032403; GO:0042803; GO:0048038; GO:0004872; GO:0046677; GO:0042493; GO:0006805; GO:0008270	Evidence at protein level	SUBCELLULAR LOCATION: Secreted, extracellular space.			SIGNAL 1 19 {ECO:0000269|PubMed:8144586}.
O14791	APOL1	GO:0072562; GO:0005254; GO:1902476; GO:0008203; GO:0019835; GO:0005576; GO:0005615; GO:0034364; GO:0045087; GO:0031224; GO:0031640; GO:0008289; GO:0006869; GO:0042157; GO:0006898; GO:0034361	Evidence at protein level	SUBCELLULAR LOCATION: Secreted.			SIGNAL 1 27 {ECO:0000269|PubMed:9325276}.
O95445	APOM	GO:0016209; GO:0033344; GO:0042632; GO:0034365; GO:0070062; GO:0005576; GO:0034364; GO:0034380; GO:0034384; GO:0034375; GO:0005887; GO:0005319; GO:0042157; GO:0034362; GO:0034445; GO:0005543; GO:0009749; GO:0001523; GO:0043691; GO:0034366; GO:0034361	Evidence at protein level	SUBCELLULAR LOCATION: Secreted {ECO:0000269|PubMed:17525477, ECO:0000269|PubMed:18279674, ECO:0000269|PubMed:18460466}. Note=Present in high density lipoprotein (HDL) and to a lesser extent in triglyceride-rich lipoproteins (TGRLP) and low density lipoproteins (LDL).			SIGNAL 1 ?22 Not cleaved.
Q5FYB1	ARSI	GO:0004065; GO:0005788; GO:0005576; GO:0006687; GO:0046872; GO:0043687	Evidence at protein level	SUBCELLULAR LOCATION: Secreted {ECO:0000269|PubMed:19262745}. Endoplasmic reticulum {ECO:0000269|PubMed:19262745}. Note=Localized in the intracellular granular structures.			SIGNAL 1 23 {ECO:0000255}.
Q6UWY0	ARSK	GO:0004065; GO:0005788; GO:0005576; GO:0006687; GO:0046872; GO:0043687	Evidence at protein level	SUBCELLULAR LOCATION: Secreted {ECO:0000305}.			SIGNAL 1 22 {ECO:0000255}.
P42127	ASIP	GO:0008343; GO:0005623; GO:0007267; GO:0005615; GO:0006091; GO:0071514; GO:0009755; GO:0042438; GO:0032438; GO:0032402; GO:0048023; GO:0005102; GO:0040030; GO:0007165	Evidence at protein level	SUBCELLULAR LOCATION: Secreted.			SIGNAL 1 22 {ECO:0000255}.
Q92484	SMPDL3A	GO:0070062; GO:0005615; GO:0009143; GO:0008081; GO:0008270	Evidence at protein level	SUBCELLULAR LOCATION: Secreted {ECO:0000269|PubMed:25288789}.			SIGNAL 1 22 {ECO:0000255}.
P17405	SMPD1	GO:0061750; GO:0046513; GO:0005768; GO:0070062; GO:0005615; GO:0006687; GO:0016798; GO:0042599; GO:0043202; GO:0005764; GO:0043407; GO:0007399; GO:0005886; GO:0043065; GO:0035307; GO:0042220; GO:0042493; GO:0007165; GO:0006685; GO:0006684; GO:0004767; GO:0023021; GO:0008270	Evidence at protein level	SUBCELLULAR LOCATION: Lysosome {ECO:0000269|PubMed:18815062}. Secreted {ECO:0000269|PubMed:8702487}.			SIGNAL 1 46
Q9BXN1	ASPN	GO:0030282; GO:0005509; GO:0019221; GO:0005737; GO:0046426; GO:0006469; GO:0070171; GO:0030512; GO:0004860; GO:0005578	Evidence at protein level	SUBCELLULAR LOCATION: Secreted, extracellular space, extracellular matrix {ECO:0000269|PubMed:17827158}.			SIGNAL 1 14 {ECO:0000255}.
Q8N6G6	ADAMTSL1	GO:0005788; GO:0008237; GO:0036066; GO:0005578; GO:0008270	Evidence at protein level	SUBCELLULAR LOCATION: Secreted, extracellular space, extracellular matrix {ECO:0000269|PubMed:11805097, ECO:0000269|PubMed:17395588, ECO:0000269|PubMed:19671700}.			SIGNAL 1 28
P82987	ADAMTSL3	GO:0008237; GO:0005578; GO:0008270	Evidence at protein level	SUBCELLULAR LOCATION: Secreted, extracellular space, extracellular matrix {ECO:0000269|PubMed:14667842}.			SIGNAL 1 26 {ECO:0000255}.
Q5T4W7	ARTN	GO:0000165; GO:0061146; GO:0005088; GO:0007411; GO:0005576; GO:0005615; GO:0050930; GO:0005622; GO:0097021; GO:0007405; GO:0007422; GO:0005102; GO:0007165	Evidence at protein level	SUBCELLULAR LOCATION: Secreted {ECO:0000250}.			SIGNAL 1 39 {ECO:0000255}.
Q6ZMM2	ADAMTSL5	GO:0005576; GO:0008201; GO:0004222; GO:0001527; GO:0005578; GO:0008270	Evidence at protein level	SUBCELLULAR LOCATION: Secreted {ECO:0000269|PubMed:23010571}. Secreted, extracellular space, extracellular matrix {ECO:0000269|PubMed:23010571}. Note=Colocalized with fibrillin microfibrils. Predominantly distributed in baso-lateral regions of fibroblast extracellular matrix.			SIGNAL 1 42 {ECO:0000255}.
O75173	ADAMTS4	GO:0031012; GO:0022617; GO:0005576; GO:0005615; GO:0004222; GO:0008237; GO:0008233; GO:0002020; GO:0005578; GO:0006508; GO:0001501; GO:0008270	Evidence at protein level	SUBCELLULAR LOCATION: Secreted, extracellular space, extracellular matrix {ECO:0000250}.			SIGNAL 1 51 {ECO:0000255}.
Q86TH1	ADAMTSL2	GO:0030198; GO:0060481; GO:0004222; GO:0050436; GO:0030512; GO:0005578; GO:0008270	Evidence at protein level	SUBCELLULAR LOCATION: Secreted {ECO:0000305}.			SIGNAL 1 22 {ECO:0000255}.
P58397	ADAMTS12	GO:0016477; GO:0007160; GO:0071773; GO:0071347; GO:0071356; GO:0031012; GO:0004222; GO:2001113; GO:1902548; GO:0032331; GO:1902203; GO:0005578; GO:0030167; GO:0051603; GO:1901509; GO:0050727; GO:0008270	Evidence at protein level	SUBCELLULAR LOCATION: Secreted, extracellular space, extracellular matrix {ECO:0000250}.			SIGNAL 1 25 {ECO:0000255}.
Q9P2N4	ADAMTS9	GO:0009986; GO:0005783; GO:0005615; GO:0006516; GO:0004222; GO:0008237; GO:0007275; GO:0045636; GO:0015031; GO:0005578; GO:0006508; GO:0016192; GO:0008270	Evidence at protein level	SUBCELLULAR LOCATION: Secreted, extracellular space, extracellular matrix {ECO:0000250}. Endoplasmic reticulum {ECO:0000269|PubMed:22419820}.			SIGNAL 1 18 {ECO:0000255}.
Q9H324	ADAMTS10	GO:0031012; GO:0004222; GO:0001527; GO:0008270	Evidence at protein level	SUBCELLULAR LOCATION: Secreted, extracellular space, extracellular matrix {ECO:0000269|PubMed:21402694}.			SIGNAL 1 25 {ECO:0000255}.
Q76LX8	ADAMTS13	GO:0005509; GO:0009986; GO:0007160; GO:0005788; GO:0005615; GO:0009100; GO:0005178; GO:0007229; GO:0004222; GO:0008237; GO:0043171; GO:0030168; GO:0036066; GO:0016485; GO:0005578; GO:0006508; GO:0034341; GO:0070670; GO:0009636; GO:0034612; GO:0008270	Evidence at protein level	SUBCELLULAR LOCATION: Secreted {ECO:0000269|PubMed:12791682}. Note=Secretion enhanced by O-fucosylation of TSP type-1 repeats.			SIGNAL 1 29 {ECO:0000255}.
Q15582	TGFBI	GO:0001525; GO:0005604; GO:0007155; GO:0008283; GO:0044267; GO:0002062; GO:0005518; GO:0070062; GO:0050840; GO:0030198; GO:0005576; GO:0005615; GO:0005178; GO:0007162; GO:0005886; GO:0005578; GO:0050896; GO:0005802; GO:0007601	Evidence at protein level	SUBCELLULAR LOCATION: Secreted {ECO:0000269|PubMed:18450759, ECO:0000269|PubMed:26273833, ECO:0000269|PubMed:8024701}. Secreted, extracellular space, extracellular matrix {ECO:0000269|PubMed:8077289}. Note=May be associated both with microfibrils and with the cell surface (PubMed:8077289). {ECO:0000269|PubMed:8077289}.			SIGNAL 1 23 {ECO:0000269|PubMed:8024701}.
Q8TE60	ADAMTS18	GO:0001654; GO:0004222; GO:0090331; GO:0005578; GO:0008270	Evidence at protein level	SUBCELLULAR LOCATION: Secreted, extracellular space, extracellular matrix {ECO:0000250}.			SIGNAL 1 47 {ECO:0000255}.
Q9UNA0	ADAMTS5	GO:0042742; GO:0005788; GO:0050840; GO:0022617; GO:0005576; GO:0005615; GO:0008201; GO:0005178; GO:0004222; GO:0008237; GO:0036066; GO:0005578; GO:0006508; GO:0008270	Evidence at protein level	SUBCELLULAR LOCATION: Secreted, extracellular space, extracellular matrix {ECO:0000250}.			SIGNAL 1 16 {ECO:0000255}.
Q9UKP4	ADAMTS7	GO:0009986; GO:0071773; GO:0071347; GO:0071356; GO:0005788; GO:0004222; GO:0008237; GO:0098779; GO:0032331; GO:0036066; GO:0005578; GO:0051603; GO:0008270	Evidence at protein level	SUBCELLULAR LOCATION: Secreted, extracellular space, extracellular matrix {ECO:0000250}. Note=Also found associated with the external cell surface. {ECO:0000250}.			SIGNAL 1 27 {ECO:0000255}.
O95393	BMP10	GO:0030509; GO:0060395; GO:0030018; GO:0032924; GO:0007512; GO:0055009; GO:0060038; GO:0007155; GO:0009986; GO:0005125; GO:0005737; GO:0005576; GO:0005615; GO:0060347; GO:0005179; GO:0010614; GO:0030308; GO:0030336; GO:0010596; GO:0060389; GO:0060045; GO:0010613; GO:0061036; GO:2000138; GO:0010862; GO:0060298; GO:0045893; GO:0033612; GO:0043408; GO:0042981; GO:0055117; GO:1903242; GO:0045214; GO:…	Evidence at protein level	SUBCELLULAR LOCATION: Secreted {ECO:0000250}.			SIGNAL 1 21 {ECO:0000255}.
P12645	BMP3	GO:0070700; GO:0030509; GO:0060395; GO:0051216; GO:0048468; GO:0007267; GO:0005125; GO:0070062; GO:0005615; GO:0040007; GO:0001649; GO:0010862; GO:0005102; GO:0043408; GO:0042981; GO:0001501; GO:0005160	Evidence at protein level	SUBCELLULAR LOCATION: Secreted.			SIGNAL 1 22 {ECO:0000255}.
P12643	BMP2	GO:0070700; GO:0070724; GO:0030509; GO:0003130; GO:0007219; GO:0046332; GO:0060395; GO:0000187; GO:0003181; GO:0030282; GO:0035630; GO:0001658; GO:0060317; GO:0055007; GO:0055008; GO:0035051; GO:0045165; GO:0009986; GO:0007267; GO:0071773; GO:0071407; GO:0002062; GO:0039706; GO:0060128; GO:0005125; GO:0009790; GO:0035054; GO:0003203; GO:0001837; GO:0005576; GO:0005615; GO:0040007; GO:0007507; GO:…	Evidence at protein level	SUBCELLULAR LOCATION: Secreted.			SIGNAL 1 23 {ECO:0000255}.
P18075	BMP7	GO:0070700; GO:0030509; GO:0060395; GO:0007411; GO:0060445; GO:0048754; GO:0051216; GO:0071773; GO:0071456; GO:0005125; GO:0016358; GO:0048596; GO:0030326; GO:0009880; GO:0060272; GO:0030855; GO:0001837; GO:0031012; GO:0005576; GO:0005615; GO:0040007; GO:0008201; GO:0031988; GO:0048762; GO:0060485; GO:0001707; GO:0001823; GO:0072136; GO:0072133; GO:0001656; GO:0070487; GO:0043407; GO:0042347; GO:…	Evidence at protein level	SUBCELLULAR LOCATION: Secreted.			SIGNAL 1 29 {ECO:0000255}.
Q8TDL5	BPIFB1	GO:0070062; GO:0005576; GO:0005615; GO:0002227; GO:0008289; GO:0034144	Evidence at protein level	SUBCELLULAR LOCATION: Secreted {ECO:0000250}.			SIGNAL 1 21 {ECO:0000255}.
Q8NFQ5	BPIFB6	GO:0005576; GO:0008289	Evidence at protein level	SUBCELLULAR LOCATION: Secreted {ECO:0000250}.			SIGNAL 1 18 {ECO:0000255}.
P61769	B2M	GO:0012507; GO:0005794; GO:0000139; GO:1990712; GO:0042612; GO:0033077; GO:0019731; GO:0019885; GO:0002479; GO:0002480; GO:0002481; GO:0002474; GO:0044267; GO:0071281; GO:0071222; GO:0005737; GO:0050829; GO:0050830; GO:0031905; GO:0031901; GO:0005788; GO:0009897; GO:0070062; GO:0005576; GO:0005615; GO:0005925; GO:0001948; GO:0042802; GO:0045087; GO:0060333; GO:0055072; GO:0016020; GO:0010977; GO:…	Evidence at protein level	SUBCELLULAR LOCATION: Secreted {ECO:0000269|PubMed:1336137, ECO:0000269|PubMed:7554280}. Note=Detected in serum and urine.			SIGNAL 1 20 {ECO:0000269|PubMed:1336137, ECO:0000269|PubMed:25946035, ECO:0000269|PubMed:3532124, ECO:0000269|PubMed:4586824, ECO:0000269|PubMed:8084451}.
P23560	BDNF	GO:0007411; GO:0031547; GO:0007267; GO:0048668; GO:0005737; GO:0016023; GO:0005576; GO:0008083; GO:0043524; GO:0007399; GO:0005169; GO:0048471; GO:0031550; GO:0048672; GO:0051965; GO:0007416	Evidence at protein level	SUBCELLULAR LOCATION: Secreted.			SIGNAL 1 18 {ECO:0000255}.
P17213	BPI	GO:0005737; GO:0050829; GO:0070062; GO:0005615; GO:0006955; GO:0005887; GO:0001530; GO:0032715; GO:0032717; GO:0043031; GO:0032720	Evidence at protein level	SUBCELLULAR LOCATION: Secreted {ECO:0000269|PubMed:8812832}. Cytoplasmic granule membrane {ECO:0000269|PubMed:2722846}. Note=Membrane-associated in polymorphonuclear Leukocytes (PMN) granules. {ECO:0000269|PubMed:2722846}.			SIGNAL 1 31 {ECO:0000269|PubMed:1937776, ECO:0000269|PubMed:2501794, ECO:0000269|PubMed:2722846, ECO:0000269|PubMed:3667613}.
P43251	BTD	GO:0006768; GO:0047708; GO:0007417; GO:0070062; GO:0005576; GO:0005615; GO:0016810; GO:0005759	Evidence at protein level	SUBCELLULAR LOCATION: Secreted, extracellular space.			SIGNAL 1 41
O95972	BMP15	GO:0030509; GO:0060395; GO:0048468; GO:0005125; GO:0005737; GO:0005615; GO:0007292; GO:0060016; GO:0001541; GO:0010862; GO:0043408; GO:0042981; GO:0005160	Evidence at protein level	SUBCELLULAR LOCATION: Secreted.			SIGNAL 1 18 {ECO:0000255}.
P13497	BMP1	GO:0030509; GO:0005794; GO:0060395; GO:0005509; GO:0001502; GO:0048468; GO:0005125; GO:0022617; GO:0005576; GO:0005615; GO:0042157; GO:0031988; GO:0004222; GO:0008237; GO:0007275; GO:0001503; GO:0008233; GO:0061036; GO:0010862; GO:0005578; GO:0006508; GO:0043408; GO:0042981; GO:0004252; GO:0001501; GO:0005160; GO:0008270	Evidence at protein level	SUBCELLULAR LOCATION: Golgi apparatus, trans-Golgi network {ECO:0000269|PubMed:12637569}. Secreted, extracellular space, extracellular matrix {ECO:0000269|PubMed:12637569}. Note=Co-localizes with POSTN in the Golgi. {ECO:0000250}.			SIGNAL 1 22 {ECO:0000255}.
Q9NP55	BPIFA1	GO:0019731; GO:0005576; GO:0005615; GO:0045087; GO:0008289; GO:0050891; GO:1900229; GO:0050828; GO:1902305	Evidence at protein level	SUBCELLULAR LOCATION: Secreted {ECO:0000269|PubMed:11425234, ECO:0000269|PubMed:12920053, ECO:0000269|PubMed:15158712, ECO:0000269|PubMed:23499554, ECO:0000269|PubMed:24043776, ECO:0000269|PubMed:24124190}. Note=Apical side of airway epithelial cells. Detected in airway surface liquid, nasal mucus and sputum.			SIGNAL 1 19 {ECO:0000255}.
P02746	C1QB	GO:0072562; GO:0005581; GO:0006956; GO:0006958; GO:0005602; GO:0070062; GO:0005576; GO:0045087; GO:0048839; GO:0004252	Evidence at protein level	SUBCELLULAR LOCATION: Secreted.			SIGNAL 1 27 {ECO:0000269|PubMed:486087, ECO:0000269|PubMed:708376}.
P02747	C1QC	GO:0072562; GO:0005581; GO:0006956; GO:0006958; GO:0070062; GO:0005576; GO:0005615; GO:0006955; GO:0045087; GO:0030853; GO:0045650; GO:0004252	Evidence at protein level	SUBCELLULAR LOCATION: Secreted.			SIGNAL 1 28 {ECO:0000269|PubMed:486087}.
O75973	C1QL1	GO:0005581; GO:0005737; GO:0005576; GO:0007626	Evidence at protein level	SUBCELLULAR LOCATION: Secreted.			SIGNAL 1 16 {ECO:0000255}.
P60827	C1QTNF8	GO:0005581; GO:0005576	Evidence at protein level	SUBCELLULAR LOCATION: Secreted {ECO:0000269|PubMed:19666007}.			SIGNAL 1 17 {ECO:0000255}.
P22004	BMP6	GO:0070700; GO:0030509; GO:0060395; GO:0051216; GO:0006879; GO:0071773; GO:0071281; GO:0071260; GO:0005125; GO:0005737; GO:0001958; GO:0005615; GO:0001654; GO:0040007; GO:0006955; GO:0006954; GO:0001822; GO:0030539; GO:0031988; GO:0060586; GO:0000122; GO:0001649; GO:2000105; GO:0060391; GO:0032349; GO:2000860; GO:0030501; GO:0032332; GO:0045603; GO:0001938; GO:0050679; GO:0031666; GO:0045666; GO:…	Evidence at protein level	SUBCELLULAR LOCATION: Secreted {ECO:0000250}.			SIGNAL 1 20 {ECO:0000255}.
Q9BXJ1	C1QTNF1	GO:0005518; GO:0005581; GO:0005615; GO:0005887; GO:0010544; GO:0090331; GO:0043410; GO:2000860; GO:0007204; GO:0010628; GO:0051897; GO:0070208; GO:0051260; GO:0010906	Evidence at protein level	SUBCELLULAR LOCATION: Secreted {ECO:0000305}.			SIGNAL 1 25 {ECO:0000255}.
P0C862	C1QTNF9	GO:0005581; GO:0005576; GO:0042802	Evidence at protein level	SUBCELLULAR LOCATION: Secreted {ECO:0000250}.			SIGNAL 1 19 {ECO:0000255}.
P06881	CALCA	GO:0002031; GO:0007190; GO:0019731; GO:0019732; GO:0007267; GO:0005737; GO:0050829; GO:0050830; GO:0043542; GO:0001935; GO:0005576; GO:0005615; GO:0045087; GO:0007159; GO:0045776; GO:0045779; GO:0010523; GO:0045671; GO:0001976; GO:0030819; GO:0051482; GO:0032730; GO:0032757; GO:0045651; GO:0045909; GO:0032403; GO:0006468; GO:0005102; GO:0031623; GO:0008217; GO:0051480; GO:0001878; GO:0001944	Evidence at protein level	SUBCELLULAR LOCATION: Secreted.			SIGNAL 1 25 {ECO:0000255}.
Q8N8U9	BMPER	GO:0002043; GO:0042118; GO:0045446; GO:0005615; GO:0048839; GO:0030514; GO:0070374; GO:0010594; GO:0060393; GO:0001657	Evidence at protein level	SUBCELLULAR LOCATION: Secreted {ECO:0000269|PubMed:14766204}.			SIGNAL 1 39 {ECO:0000255}.
Q9NZP8	C1RL	GO:0006958; GO:0070062; GO:0005615; GO:0045087; GO:0004252	Evidence at protein level	SUBCELLULAR LOCATION: Secreted {ECO:0000269|PubMed:15358180}.			SIGNAL 1 35 {ECO:0000255}.
Q16568	CARTPT	GO:0007186; GO:0000186; GO:0008343; GO:0007267; GO:0001678; GO:0009267; GO:0032922; GO:0005615; GO:0032099; GO:0045779; GO:0070093; GO:0045671; GO:0005184; GO:0007218; GO:0045777; GO:0032812; GO:0051971; GO:0050796; GO:0030141; GO:0007165; GO:0070253; GO:0007268	Evidence at protein level	SUBCELLULAR LOCATION: Secreted {ECO:0000305}.			SIGNAL 1 27 {ECO:0000269|PubMed:15340161}.
P12644	BMP4	GO:0070700; GO:0030509; GO:0003130; GO:0071893; GO:0061151; GO:0061149; GO:0060395; GO:0000186; GO:0060033; GO:0009948; GO:0002043; GO:0060442; GO:0001658; GO:0048754; GO:0060433; GO:0060503; GO:0060449; GO:0003279; GO:0071773; GO:0071260; GO:0034599; GO:0097067; GO:0042056; GO:0002062; GO:0060197; GO:0039706; GO:0007182; GO:0060363; GO:0005125; GO:0005737; GO:0035993; GO:0021904; GO:0048701; GO:…	Evidence at protein level	SUBCELLULAR LOCATION: Secreted, extracellular space, extracellular matrix.			SIGNAL 1 19 {ECO:0000255}.
Q96DR5	BPIFA2	GO:0042742; GO:0070062; GO:0005576; GO:0001530	Evidence at protein level	SUBCELLULAR LOCATION: Secreted {ECO:0000250}.			SIGNAL 1 18 {ECO:0000255}.
Q8N4F0	BPIFB2	GO:0070062; GO:0005615; GO:0008289	Evidence at protein level	SUBCELLULAR LOCATION: Secreted {ECO:0000250}.			SIGNAL 1 20 {ECO:0000269|PubMed:15340161}.
Q76B58	BRINP3	GO:0007050; GO:0071300; GO:0030425; GO:0005783; GO:0005576; GO:0005739; GO:0045930; GO:0043025; GO:0045666	Evidence at protein level	SUBCELLULAR LOCATION: Secreted {ECO:0000305}. Mitochondrion {ECO:0000250}.			SIGNAL 1 33 {ECO:0000255}.
P27797	CALR	GO:0036500; GO:0003677; GO:0005794; GO:0042824; GO:0001669; GO:0050681; GO:0002474; GO:0005509; GO:0030246; GO:0055007; GO:0007050; GO:0009986; GO:0006874; GO:0071285; GO:0090398; GO:0051087; GO:0061077; GO:0001849; GO:0030866; GO:0005737; GO:0005829; GO:0071682; GO:0005783; GO:0005788; GO:0009897; GO:0070062; GO:0005576; GO:0005615; GO:0005925; GO:0042921; GO:0001948; GO:0042562; GO:0071556; GO:…	Evidence at protein level	SUBCELLULAR LOCATION: Endoplasmic reticulum lumen {ECO:0000269|PubMed:10358038, ECO:0000269|PubMed:11149926}. Cytoplasm, cytosol {ECO:0000269|PubMed:11149926}. Secreted, extracellular space, extracellular matrix {ECO:0000305}. Cell surface {ECO:0000269|PubMed:10358038}. Sarcoplasmic reticulum lumen {ECO:0000250|UniProtKB:P28491}. Note=Also found in cell surface (T cells), cytosol and extracellula…			SIGNAL 1 17 {ECO:0000244|PubMed:25944712, ECO:0000269|PubMed:1286669, ECO:0000269|PubMed:1911778, ECO:0000269|PubMed:2400400, ECO:0000269|PubMed:3260607, ECO:0000269|PubMed:7841019, ECO:0000269|PubMed:8418194, ECO:0000269|PubMed:9150948}.
P05814	CSN2	GO:0005509; GO:0006816; GO:0004857; GO:0005576; GO:0005615; GO:0007595; GO:1903488; GO:0005215	Evidence at protein level	SUBCELLULAR LOCATION: Secreted.			SIGNAL 1 15 {ECO:0000269|PubMed:6715339}.
Q9BXJ5	C1QTNF2	GO:0000187; GO:0005581; GO:0005615; GO:0046321; GO:0046326; GO:0045725; GO:0070208; GO:0051260	Evidence at protein level	SUBCELLULAR LOCATION: Secreted {ECO:0000305}.			SIGNAL 1 15 {ECO:0000255}.
Q9BXI9	C1QTNF6	GO:0005581; GO:0005615; GO:0070208	Evidence at protein level	SUBCELLULAR LOCATION: Secreted {ECO:0000305}.			SIGNAL 1 27 {ECO:0000269|PubMed:15340161}.
P23280	CA6	GO:0015701; GO:0004089; GO:0005829; GO:0001580; GO:0070062; GO:0005576; GO:0005615; GO:0006730; GO:0008270	Evidence at protein level	SUBCELLULAR LOCATION: Secreted.			SIGNAL 1 17 {ECO:0000255}.
P10092	CALCB	GO:0005623; GO:0006874; GO:0005576; GO:0098779; GO:0005184; GO:0007165	Evidence at protein level	SUBCELLULAR LOCATION: Secreted.			SIGNAL 1 25 {ECO:0000255}.
P01258	CALCA	GO:0007190; GO:0032147; GO:0007189; GO:0007568; GO:0031716; GO:0044267; GO:1990090; GO:0071356; GO:0005737; GO:0050965; GO:0007566; GO:0005576; GO:0005615; GO:0007631; GO:0042802; GO:0006954; GO:0002548; GO:0045779; GO:0031645; GO:0030279; GO:0045986; GO:0045892; GO:0043025; GO:0007218; GO:0005634; GO:0045762; GO:0007204; GO:0051482; GO:0045778; GO:0002027; GO:0009408; GO:0048265; GO:0043195; GO:…	Evidence at protein level	SUBCELLULAR LOCATION: Secreted.			SIGNAL 1 25 {ECO:0000255}.
P07498	CSN3	GO:0005576; GO:0005615; GO:0007595; GO:0050821; GO:0055085	Evidence at protein level	SUBCELLULAR LOCATION: Secreted.			SIGNAL 1 20
P23435	CBLN1	GO:0030054; GO:0021707; GO:0005576; GO:0007157; GO:0007399; GO:0051965; GO:0045211; GO:0009306; GO:0007268	Evidence at protein level	SUBCELLULAR LOCATION: Secreted. Cell junction, synapse, postsynaptic cell membrane {ECO:0000250}.			SIGNAL 1 21 {ECO:0000255}.
P48052	CPA2	GO:0004180; GO:0005576; GO:0005615; GO:0004181; GO:0007039; GO:0005773; GO:0008270	Evidence at protein level	SUBCELLULAR LOCATION: Secreted.			SIGNAL 1 18 {ECO:0000255}.
Q66K79	CPZ	GO:0016055; GO:0070062; GO:0005615; GO:0004181; GO:0006518; GO:0016485; GO:0005578; GO:0006508; GO:0004185; GO:0008270	Evidence at protein level	SUBCELLULAR LOCATION: Secreted, extracellular space, extracellular matrix {ECO:0000269|PubMed:10671522}.			SIGNAL 1 18 {ECO:0000255}.
Q9GZN4	PRSS22	GO:0046658; GO:0005576; GO:0019897; GO:0004252; GO:0008236	Evidence at protein level	SUBCELLULAR LOCATION: Secreted {ECO:0000269|PubMed:11602603}.			SIGNAL 1 32 {ECO:0000255}.
Q9BXJ4	C1QTNF3	GO:0005623; GO:0035356; GO:0005581; GO:0070062; GO:0005615; GO:0045444; GO:0016020; GO:0042347; GO:0010629; GO:0045721; GO:0050728; GO:1900165; GO:0071638; GO:0070165; GO:0050715; GO:0070206	Evidence at protein level	SUBCELLULAR LOCATION: Secreted {ECO:0000305}.			SIGNAL 1 22 {ECO:0000255}.
O43852	CALU	GO:0005794; GO:0005509; GO:0005783; GO:0005789; GO:0004857; GO:0005576; GO:0042470; GO:0016020; GO:0014012; GO:0014070; GO:0033018	Evidence at protein level	SUBCELLULAR LOCATION: Endoplasmic reticulum membrane {ECO:0000269|PubMed:10222138}. Golgi apparatus {ECO:0000269|PubMed:10222138}. Secreted {ECO:0000305}. Melanosome {ECO:0000269|PubMed:12643545}. Sarcoplasmic reticulum lumen {ECO:0000305}. Note=Identified by mass spectrometry in melanosome fractions from stage I to stage IV. {ECO:0000269|PubMed:12643545}.			SIGNAL 1 19 {ECO:0000269|PubMed:12665801}.
P47710	CSN1S1	GO:0005576; GO:0005615; GO:0055085; GO:0005215	Evidence at protein level	SUBCELLULAR LOCATION: Secreted.			SIGNAL 1 15 {ECO:0000269|PubMed:7749638, ECO:0000269|PubMed:8192860}.
P07339	CTSD	GO:0019886; GO:0004190; GO:0006914; GO:0030574; GO:0004197; GO:0070062; GO:0005576; GO:0005615; GO:0043202; GO:0005764; GO:0042470; GO:0045121; GO:0030163; GO:0004252	Evidence at protein level	SUBCELLULAR LOCATION: Lysosome. Melanosome. Secreted, extracellular space. Note=Identified by mass spectrometry in melanosome fractions from stage I to stage IV. In aortic samples, detected as an extracellular protein loosely bound to the matrix (PubMed:20551380). {ECO:0000269|PubMed:20551380}.			SIGNAL 1 18
P08185	SERPINA6	GO:0070062; GO:0005615; GO:0008211; GO:0004867; GO:0005496; GO:0006810	Evidence at protein level	SUBCELLULAR LOCATION: Secreted.			SIGNAL 1 22 {ECO:0000269|PubMed:3347061}.
Q8N4T0	CPA6	GO:0005615; GO:0004181; GO:0005578; GO:0008270	Evidence at protein level	SUBCELLULAR LOCATION: Secreted, extracellular space, extracellular matrix {ECO:0000269|PubMed:18178555}.			SIGNAL 1 30 {ECO:0000255}.
Q9H6E4	CCDC134	GO:0005576; GO:0016020	Evidence at protein level	SUBCELLULAR LOCATION: Secreted {ECO:0000305}.			SIGNAL 1 22 {ECO:0000255}.
P51671	CCL11	GO:0048020; GO:0070371; GO:0007186; GO:0007015; GO:0060444; GO:0007155; GO:0006874; GO:0071346; GO:0071347; GO:0071356; GO:0008009; GO:0070098; GO:0006935; GO:0002544; GO:0007010; GO:0048245; GO:0005576; GO:0005615; GO:0006954; GO:0005622; GO:0048247; GO:0060763; GO:0002551; GO:0002548; GO:0030593; GO:0070374; GO:0043547; GO:0030838; GO:0045766; GO:0030335; GO:0001938; GO:0050729; GO:0006468; GO:…	Evidence at protein level	SUBCELLULAR LOCATION: Secreted.			SIGNAL 1 23
O15467	CCL16	GO:0048020; GO:0007186; GO:0007154; GO:0007267; GO:0071346; GO:0071347; GO:0071356; GO:0042056; GO:0008009; GO:0070098; GO:0006935; GO:0005576; GO:0005615; GO:0006954; GO:0048247; GO:0002548; GO:0030593; GO:0070374; GO:0043547; GO:0050729	Evidence at protein level	SUBCELLULAR LOCATION: Secreted.			SIGNAL 1 23 {ECO:0000269|PubMed:9596672}.
O15444	CCL25	GO:0031735; GO:0007186; GO:0060326; GO:0007166; GO:0071346; GO:0071347; GO:0071356; GO:0008009; GO:0042379; GO:0070098; GO:0006935; GO:0005576; GO:0005615; GO:0005179; GO:0006955; GO:0006954; GO:0048247; GO:0002548; GO:1903237; GO:0030593; GO:0070374; GO:0043547; GO:0001954	Evidence at protein level	SUBCELLULAR LOCATION: Secreted.			SIGNAL 1 23 {ECO:0000255}.
Q9Y4X3	CCL27	GO:0007267; GO:0008009; GO:0006935; GO:0005576; GO:0005615; GO:0006955	Evidence at protein level	SUBCELLULAR LOCATION: Secreted {ECO:0000250|UniProtKB:Q9Z1X0}.			SIGNAL 1 24 {ECO:0000269|PubMed:10556532}.
Q9NRJ3	CCL28	GO:0060326; GO:0008009; GO:0006935; GO:0005829; GO:0070062; GO:0005576; GO:0005615; GO:0006955; GO:1903237; GO:0001954; GO:0007204	Evidence at protein level	SUBCELLULAR LOCATION: Secreted.			SIGNAL 1 19 {ECO:0000255}.
P13236	CCL4	GO:0031726; GO:0031730; GO:0007186; GO:0007155; GO:0007267; GO:0071346; GO:0071347; GO:0071356; GO:0008009; GO:0070098; GO:0005125; GO:0007163; GO:0005576; GO:0005615; GO:0042802; GO:0006955; GO:0006954; GO:0002548; GO:0006928; GO:0043922; GO:0030593; GO:0070374; GO:0043547; GO:0051928; GO:0050850; GO:0050729; GO:2000503; GO:0009636; GO:0009615; GO:0007165	Evidence at protein level	SUBCELLULAR LOCATION: Secreted.			SIGNAL 1 23
P80098	CCL7	GO:0031726; GO:0007186; GO:0005623; GO:0007267; GO:0006874; GO:0071361; GO:0071346; GO:0071347; GO:0071356; GO:0008009; GO:0070098; GO:0006935; GO:0007010; GO:0048245; GO:0005576; GO:0005615; GO:0008201; GO:0006954; GO:0002548; GO:0030593; GO:0070374; GO:0043547; GO:0030335; GO:0050729; GO:2000503; GO:0008360; GO:0010332; GO:0007165	Evidence at protein level	SUBCELLULAR LOCATION: Secreted.			SIGNAL 1 23 {ECO:0000269|PubMed:15340161}.
P02745	C1QA	GO:0007267; GO:0005581; GO:0006956; GO:0006958; GO:0005602; GO:0070062; GO:0005576; GO:0045087; GO:0010039; GO:0004252	Evidence at protein level	SUBCELLULAR LOCATION: Secreted.			SIGNAL 1 22 {ECO:0000269|PubMed:486087}.
Q9BXJ3	C1QTNF4	GO:0005615	Evidence at protein level	SUBCELLULAR LOCATION: Secreted {ECO:0000269|PubMed:21658842}.			SIGNAL 1 16 {ECO:0000269|PubMed:21658842}.
P04003	C4BPA	GO:0072562; GO:0006958; GO:0005576; GO:0005615; GO:0045087; GO:0045959; GO:0044216; GO:0005886; GO:0044822; GO:0045732; GO:0030449; GO:1903027	Evidence at protein level	SUBCELLULAR LOCATION: Secreted.			SIGNAL 1 48 {ECO:0000269|PubMed:4033666}.
P20851	C4BPB	GO:0007596; GO:0006958; GO:0005576; GO:0005615; GO:0045087; GO:0045959; GO:0044216; GO:0005886; GO:0045732; GO:0030449; GO:1903027	Evidence at protein level	SUBCELLULAR LOCATION: Secreted.			SIGNAL 1 17
P49913	CAMP	GO:0019731; GO:0019732; GO:0045454; GO:0005618; GO:0002544; GO:0050829; GO:0050830; GO:0042742; GO:0070062; GO:0005576; GO:0005615; GO:0045087; GO:0002227; GO:0005622; GO:0051873; GO:0044140; GO:2000484; GO:0001878; GO:0042581	Evidence at protein level	SUBCELLULAR LOCATION: Secreted.			SIGNAL 1 30 {ECO:0000255}.
P15086	CPB1	GO:0004180; GO:0005615; GO:0004181; GO:0008270	Evidence at protein level	SUBCELLULAR LOCATION: Secreted {ECO:0000250|UniProtKB:P00732}.			SIGNAL 1 15 {ECO:0000269|PubMed:1370825, ECO:0000269|PubMed:2920728}.
Q96IY4	CPB2	GO:0007596; GO:0005623; GO:0071333; GO:0070062; GO:0005615; GO:0042730; GO:0097421; GO:0004181; GO:0051918; GO:2000346; GO:0010757; GO:0003331; GO:0006508; GO:0042493; GO:0009408; GO:0008270	Evidence at protein level	SUBCELLULAR LOCATION: Secreted.			SIGNAL 1 22 {ECO:0000255}.
Q6NSX1	CCDC70	GO:0005576; GO:0005886	Evidence at protein level	SUBCELLULAR LOCATION: Secreted {ECO:0000305}.			SIGNAL 1 32 {ECO:0000255}.
P06307	CCK	GO:0006919; GO:0030424; GO:0043203; GO:0043194; GO:0007409; GO:0001662; GO:0030425; GO:0042755; GO:0005576; GO:0005615; GO:0005179; GO:0032099; GO:0001764; GO:0005184; GO:0043204; GO:0008284; GO:0014049; GO:0051901; GO:0050731; GO:0032461; GO:0007205; GO:0051930; GO:0001836; GO:0007165; GO:0043195	Evidence at protein level	SUBCELLULAR LOCATION: Secreted.			SIGNAL 1 20
Q16627	CCL14	GO:0048020; GO:0007186; GO:0005623; GO:0006874; GO:0071346; GO:0071347; GO:0071356; GO:0008009; GO:0070098; GO:0005615; GO:0006954; GO:0048247; GO:0002548; GO:0030593; GO:0070374; GO:0043547; GO:0008284; GO:0050729	Evidence at protein level	SUBCELLULAR LOCATION: Secreted.			SIGNAL 1 19 {ECO:0000269|PubMed:10978165, ECO:0000269|PubMed:11085751, ECO:0000269|PubMed:8551235}.
P13501	CCL5	GO:0031726; GO:0031729; GO:0031730; GO:0007186; GO:0000165; GO:0031584; GO:0007568; GO:0006816; GO:0007267; GO:0006874; GO:0043623; GO:0071448; GO:0071230; GO:0071361; GO:0044344; GO:0071403; GO:0071346; GO:0071347; GO:0071315; GO:0071407; GO:0071560; GO:0071356; GO:0071307; GO:0042056; GO:0008009; GO:0046817; GO:0042379; GO:0070098; GO:0006935; GO:0002544; GO:0005737; GO:0002407; GO:0018894; GO:…	Evidence at protein level	SUBCELLULAR LOCATION: Secreted.			SIGNAL 1 23 {ECO:0000269|PubMed:1380064, ECO:0000269|PubMed:7524281}.
Q17RF5	ODAPH	GO:0005576	Evidence at protein level	SUBCELLULAR LOCATION: Secreted {ECO:0000305}.			SIGNAL 1 23 {ECO:0000255}.
O75493	CA11	GO:0016323; GO:0005576	Evidence at protein level	SUBCELLULAR LOCATION: Secreted {ECO:0000305}.			SIGNAL 1 23 {ECO:0000255}.
Q6UW01	CBLN3	GO:0005794; GO:0030054; GO:0005783; GO:0005615; GO:0045202	Evidence at protein level	SUBCELLULAR LOCATION: Endoplasmic reticulum {ECO:0000250}. Golgi apparatus, cis-Golgi network {ECO:0000250}. Secreted {ECO:0000250}. Cell junction, synapse {ECO:0000250}. Note=In the absence of CBLN1, remains in the endoplasmic reticulum/cis-Golgi apparatus. Partial secretion depends on a association with CBLN1 and maybe CBLN4, but not on CBLN2 (By similarity). {ECO:0000250}.			SIGNAL 1 32 {ECO:0000269|PubMed:15340161}.
P16870	CPE	GO:0005794; GO:0016055; GO:0004180; GO:0003214; GO:0050839; GO:0006464; GO:0070062; GO:0005615; GO:0030070; GO:0008152; GO:0004181; GO:0042043; GO:0043025; GO:0007218; GO:0005634; GO:0005886; GO:0072657; GO:0030141; GO:0030667; GO:0004185; GO:0097060; GO:0030658; GO:0008270	Evidence at protein level	SUBCELLULAR LOCATION: Isoform 1: Cytoplasmic vesicle, secretory vesicle membrane {ECO:0000250|UniProtKB:P15087}; Peripheral membrane protein {ECO:0000250|UniProtKB:P15087}. Secreted {ECO:0000250|UniProtKB:P15087}. Note=Associated with the secretory granule membrane through direct binding to lipid rafts in intragranular conditions. {ECO:0000250|UniProtKB:P15087}.; SUBCELLULAR LOCATION: Isoform 2: …			SIGNAL 1 25 {ECO:0000255}.
Q99616	CCL13	GO:0048020; GO:0007186; GO:0005623; GO:0007267; GO:0006874; GO:0071346; GO:0071347; GO:0071356; GO:0008009; GO:0070098; GO:0006935; GO:0007010; GO:0048245; GO:0005615; GO:0006954; GO:0048247; GO:0002548; GO:0030593; GO:0070374; GO:0043547; GO:0050729; GO:0005102; GO:0008360; GO:0007165	Evidence at protein level	SUBCELLULAR LOCATION: Secreted.			SIGNAL 1 16 {ECO:0000269|PubMed:8642349}.
Q99731	CCL19	GO:0048020; GO:0031735; GO:0031732; GO:0007186; GO:0031295; GO:0007257; GO:0007154; GO:0048469; GO:0006874; GO:0071346; GO:0071347; GO:0071356; GO:0098586; GO:0008009; GO:0042379; GO:0070098; GO:0002407; GO:0001768; GO:0005576; GO:0005615; GO:0006955; GO:0001771; GO:0006954; GO:0072610; GO:0005622; GO:0048247; GO:0097029; GO:0002548; GO:0002408; GO:2000107; GO:0070374; GO:0043547; GO:0043123; GO:…	Evidence at protein level	SUBCELLULAR LOCATION: Secreted.			SIGNAL 1 21
O00175	CCL24	GO:0048020; GO:0007186; GO:0007267; GO:0071346; GO:0071347; GO:0071356; GO:0008009; GO:0070098; GO:0006935; GO:0007010; GO:0048245; GO:0005615; GO:0006955; GO:0006954; GO:0048247; GO:0002548; GO:0030593; GO:0070374; GO:0043547; GO:0030838; GO:0045766; GO:0030335; GO:0001938; GO:2000418; GO:0050729; GO:0008360; GO:0007165	Evidence at protein level	SUBCELLULAR LOCATION: Secreted.			SIGNAL 1 26 {ECO:0000269|PubMed:15340161, ECO:0000269|PubMed:9104803, ECO:0000269|PubMed:9365122}.
P10147	CCL3	GO:0031726; GO:0031730; GO:0007186; GO:0000165; GO:0010818; GO:0043615; GO:0007610; GO:0006816; GO:0004698; GO:0019722; GO:0001775; GO:0007267; GO:0006874; GO:0071346; GO:0071347; GO:0071407; GO:0071356; GO:0042056; GO:0008009; GO:0070098; GO:0006935; GO:0005737; GO:0007010; GO:0005829; GO:0048245; GO:0043308; GO:0006887; GO:0005576; GO:0005615; GO:0071621; GO:0042802; GO:0006954; GO:0005622; GO:…	Evidence at protein level	SUBCELLULAR LOCATION: Secreted.			SIGNAL 1 23 {ECO:0000269|PubMed:8541527}.
Q5BLP8	C4orf48	GO:0005576	Evidence at protein level	SUBCELLULAR LOCATION: Secreted {ECO:0000305}.			SIGNAL 1 34 {ECO:0000255}.
Q9NTU7	CBLN4	GO:0005623; GO:0030054; GO:0005615; GO:0009306; GO:0045202	Evidence at protein level	SUBCELLULAR LOCATION: Secreted {ECO:0000250}. Cell junction, synapse {ECO:0000250}.			SIGNAL 1 27 {ECO:0000269|PubMed:15340161}.
Q8NHW4	CCL4L1	GO:0048020; GO:0007186; GO:0071346; GO:0071347; GO:0071356; GO:0008009; GO:0070098; GO:0005615; GO:0006954; GO:0048247; GO:0002548; GO:0030593; GO:0070374; GO:0043547; GO:0050729	Evidence at protein level	SUBCELLULAR LOCATION: Secreted {ECO:0000250}.			SIGNAL 1 23 {ECO:0000250}.
P55774	CCL18	GO:0048020; GO:0007186; GO:0007154; GO:0007267; GO:0071346; GO:0071347; GO:0071356; GO:0008009; GO:0070098; GO:0006935; GO:0005615; GO:0006955; GO:0006954; GO:0048247; GO:0002548; GO:0030593; GO:0070374; GO:0043547; GO:0050729; GO:0009607; GO:0007165	Evidence at protein level	SUBCELLULAR LOCATION: Secreted.			SIGNAL 1 20 {ECO:0000269|PubMed:9192897}.
O00585	CCL21	GO:0048020; GO:0031732; GO:0007186; GO:0031295; GO:0090630; GO:0060326; GO:0048469; GO:0007267; GO:0071346; GO:0071347; GO:0071356; GO:0008009; GO:0042379; GO:0070098; GO:0002407; GO:0097026; GO:0001768; GO:0005576; GO:0005615; GO:0006955; GO:0001771; GO:0006954; GO:0005622; GO:0048247; GO:0035759; GO:0002548; GO:2000548; GO:2000107; GO:1903237; GO:0070374; GO:0043123; GO:0046330; GO:2000406; GO:…	Evidence at protein level	SUBCELLULAR LOCATION: Secreted.			SIGNAL 1 23 {ECO:0000269|PubMed:9300671}.
P07858	CTSB	GO:0016324; GO:0006914; GO:0005901; GO:0071260; GO:0097067; GO:0005518; GO:0030574; GO:0004197; GO:0008234; GO:0046697; GO:0036021; GO:0030855; GO:0009897; GO:0070062; GO:0005576; GO:0005615; GO:0005622; GO:0043231; GO:0005764; GO:0042470; GO:0005739; GO:0060548; GO:0005730; GO:0008233; GO:0042277; GO:0048471; GO:0043394; GO:0006508; GO:0051603; GO:0042981; GO:0050790; GO:0014075; GO:0045471; GO:…	Evidence at protein level	SUBCELLULAR LOCATION: Lysosome. Melanosome. Secreted, extracellular space {ECO:0000250}. Note=Identified by mass spectrometry in melanosome fractions from stage I to stage IV.			SIGNAL 1 17 {ECO:0000255}.
Q8N8R5	C2orf69	GO:0005576	Evidence at protein level	SUBCELLULAR LOCATION: Secreted {ECO:0000305}.			SIGNAL 1 24 {ECO:0000255}.
Q9UI42	CPA4	GO:0005615; GO:0016573; GO:0004181; GO:0008270	Evidence at protein level	SUBCELLULAR LOCATION: Secreted {ECO:0000250}.			SIGNAL 1 16 {ECO:0000255}.
Q6UXH8	CCBE1	GO:0005509; GO:0005518; GO:0005581; GO:0005615; GO:0001946; GO:0045766; GO:0010595; GO:1901492; GO:0010954; GO:0010575; GO:1900748; GO:0002020; GO:0005578; GO:0002040; GO:0048845	Evidence at protein level	SUBCELLULAR LOCATION: Secreted {ECO:0000305}.			SIGNAL 1 34 {ECO:0000255}.
O00626	CCL22	GO:0048020; GO:0007186; GO:0007267; GO:0071346; GO:0071347; GO:0071356; GO:0008009; GO:0070098; GO:0006935; GO:0005576; GO:0005615; GO:0006955; GO:0006954; GO:0048247; GO:0002548; GO:0030593; GO:0070374; GO:0043547; GO:0009615; GO:0007165	Evidence at protein level	SUBCELLULAR LOCATION: Secreted.			SIGNAL 1 24 {ECO:0000269|PubMed:9151897}.
P13500	CCL2	GO:0044299; GO:0031727; GO:0007186; GO:0007187; GO:0007259; GO:0000165; GO:0036499; GO:0007568; GO:0001525; GO:0043615; GO:0043679; GO:0007155; GO:0007166; GO:0006874; GO:0019725; GO:0071318; GO:0071549; GO:0035690; GO:0044344; GO:0071403; GO:0032869; GO:0071346; GO:0071347; GO:0071354; GO:0071222; GO:0036006; GO:0071407; GO:0036120; GO:0071300; GO:0071356; GO:0008009; GO:0070098; GO:0006935; GO:…	Evidence at protein level	SUBCELLULAR LOCATION: Secreted.			SIGNAL 1 23 {ECO:0000269|PubMed:2648385}.
P80075	CCL8	GO:0048020; GO:0007186; GO:0006816; GO:0005623; GO:0007267; GO:0006874; GO:0071346; GO:0071347; GO:0071356; GO:0008009; GO:0070098; GO:0006935; GO:0006887; GO:0005615; GO:0008201; GO:0006954; GO:0048247; GO:0002548; GO:0070664; GO:0030593; GO:0016004; GO:0070374; GO:0043547; GO:0050729; GO:0002687; GO:0004672; GO:0009615; GO:0007165	Evidence at protein level	SUBCELLULAR LOCATION: Secreted.			SIGNAL 1 23 {ECO:0000305}.
P05156	CFI	GO:0006958; GO:0070062; GO:0005576; GO:0005615; GO:0045087; GO:0016020; GO:0046872; GO:0030449; GO:0005044; GO:0004252	Evidence at protein level	SUBCELLULAR LOCATION: Secreted, extracellular space.			SIGNAL 1 18
P15085	CPA1	GO:0005615; GO:0004181; GO:0006508; GO:0008270	Evidence at protein level	SUBCELLULAR LOCATION: Secreted.			SIGNAL 1 16 {ECO:0000269|PubMed:2307232, ECO:0000269|PubMed:2920728}.
P15169	CPN1	GO:0010815; GO:0005615; GO:0004181; GO:0006518; GO:0016485; GO:0051384; GO:0004185; GO:0008270	Evidence at protein level	SUBCELLULAR LOCATION: Secreted, extracellular space.			SIGNAL 1 20 {ECO:0000269|PubMed:3408501}.
Q9Y646	CPQ	GO:0005794; GO:0004180; GO:0005737; GO:0005783; GO:0070062; GO:0005615; GO:0005764; GO:0046872; GO:0070573; GO:0043171; GO:0042803; GO:0006508; GO:0006590; GO:0042246	Evidence at protein level	SUBCELLULAR LOCATION: Endoplasmic reticulum {ECO:0000269|PubMed:10206990}. Golgi apparatus {ECO:0000269|PubMed:10206990}. Lysosome {ECO:0000250}. Secreted {ECO:0000269|PubMed:10206990}. Note=Secretion is stimulated by TSH/thyroid-stimulating hormone, INS/insulin and SST/somatostatin. {ECO:0000250}.			SIGNAL 1 20 {ECO:0000255}.
Q92583	CCL17	GO:0048020; GO:0007186; GO:0007267; GO:0071346; GO:0071347; GO:0071356; GO:0008009; GO:0070098; GO:0006935; GO:0005576; GO:0005615; GO:0006954; GO:0048247; GO:0002548; GO:0007275; GO:0045662; GO:0030593; GO:0070374; GO:0043547; GO:0005102	Evidence at protein level	SUBCELLULAR LOCATION: Secreted.			SIGNAL 1 23 {ECO:0000269|PubMed:8702936}.
P22362	CCL1	GO:0048020; GO:0007186; GO:0005623; GO:0006874; GO:0071346; GO:0071347; GO:0071356; GO:0008009; GO:0070098; GO:0006935; GO:0005576; GO:0005615; GO:0006954; GO:0048247; GO:0002548; GO:0030593; GO:0070374; GO:0043547; GO:0050729; GO:0051384; GO:0007165; GO:0016032	Evidence at protein level	SUBCELLULAR LOCATION: Secreted.			SIGNAL 1 23 {ECO:0000269|PubMed:15340161, ECO:0000269|PubMed:1557400}.
P78556	CCL20	GO:0048020; GO:0007186; GO:0007267; GO:0071346; GO:0071347; GO:0071222; GO:0071223; GO:0071356; GO:0008009; GO:0070098; GO:0006935; GO:0042742; GO:0005576; GO:0005615; GO:0006955; GO:0006954; GO:0048247; GO:0002548; GO:0030593; GO:0070374; GO:0043547; GO:2000406; GO:0050726; GO:0051770; GO:0007165; GO:0042060	Evidence at protein level	SUBCELLULAR LOCATION: Secreted.			SIGNAL 1 26 {ECO:0000269|PubMed:9038201}.
Q2WEN9	CEACAM16	GO:0005615; GO:0042802; GO:0007605; GO:0032426	Evidence at protein level	SUBCELLULAR LOCATION: Secreted {ECO:0000269|PubMed:25589040}. Note=Localizes to the tip of cochlear outer hair cells and to the tectorial membrane. {ECO:0000250|UniProtKB:E9QA28}.			SIGNAL 1 20 {ECO:0000255}.
Q9NZK5	ADA2	GO:0006154; GO:0004000; GO:0031685; GO:0044267; GO:0005576; GO:0005615; GO:0008083; GO:0008201; GO:0043103; GO:0046103; GO:0007275; GO:0042803; GO:0043394; GO:0008270	Evidence at protein level	SUBCELLULAR LOCATION: Secreted {ECO:0000269|PubMed:15926889, ECO:0000269|PubMed:20147294, ECO:0000269|PubMed:20453107}.			SIGNAL 1 29 {ECO:0000255}.
P08217	CELA2A	GO:0005615; GO:0036457; GO:0017171; GO:0004252	Evidence at protein level	SUBCELLULAR LOCATION: Secreted.			SIGNAL 1 16
O95813	CER1	GO:0036122; GO:0030509; GO:0009948; GO:0009952; GO:0030282; GO:0042074; GO:0071773; GO:0048263; GO:0005576; GO:0005615; GO:0007369; GO:0003419; GO:0016015; GO:0030514; GO:0032926; GO:0008285; GO:2000381; GO:0007399; GO:0042803; GO:0035582; GO:0023019; GO:0001657	Evidence at protein level	SUBCELLULAR LOCATION: Secreted {ECO:0000305}.			SIGNAL 1 17 {ECO:0000269|PubMed:15340161}.
Q16663	CCL15	GO:0048020; GO:0007186; GO:0005623; GO:0007267; GO:0006874; GO:0071346; GO:0071347; GO:0071356; GO:0042056; GO:0008009; GO:0070098; GO:0006935; GO:0005615; GO:0008201; GO:0006954; GO:0048247; GO:0002548; GO:0030593; GO:0070374; GO:0043547; GO:0050729; GO:0005102; GO:0007165	Evidence at protein level	SUBCELLULAR LOCATION: Secreted.			SIGNAL 1 21 {ECO:0000269|PubMed:15340161}.
P55773	CCL23	GO:0031726; GO:0007186; GO:0005623; GO:0007267; GO:0006874; GO:0071346; GO:0071347; GO:0071356; GO:0008009; GO:0070098; GO:0006935; GO:0005576; GO:0005615; GO:0008201; GO:0006955; GO:0006954; GO:0048247; GO:0002548; GO:2001264; GO:0008285; GO:0030593; GO:0070374; GO:0043547; GO:0050729; GO:0007165	Evidence at protein level	SUBCELLULAR LOCATION: Secreted.			SIGNAL 1 21 {ECO:0000269|PubMed:9104803}.
P08603	CFH	GO:0072562; GO:0006956; GO:0006957; GO:0070062; GO:0005576; GO:0005615; GO:0043395; GO:0008201; GO:0030449	Evidence at protein level	SUBCELLULAR LOCATION: Secreted.			SIGNAL 1 18 {ECO:0000269|PubMed:6215918}.
P36222	CHI3L1	GO:0007250; GO:0006915; GO:0030246; GO:0005975; GO:0051216; GO:0071347; GO:0071356; GO:0008061; GO:0005737; GO:0005783; GO:0070062; GO:0005201; GO:0005615; GO:0004553; GO:0006954; GO:0072606; GO:0030324; GO:0048471; GO:0070374; GO:0045766; GO:0010800; GO:0051897; GO:0005578; GO:0070555; GO:0070741; GO:0009612; GO:0034612	Evidence at protein level	SUBCELLULAR LOCATION: Secreted, extracellular space {ECO:0000269|PubMed:9492324}. Cytoplasm {ECO:0000250}. Cytoplasm, perinuclear region {ECO:0000250}. Endoplasmic reticulum {ECO:0000250}.			SIGNAL 1 21 {ECO:0000269|PubMed:2375755, ECO:0000269|PubMed:9492324}.
Q9Y258	CCL26	GO:0048020; GO:0007186; GO:0007267; GO:0071346; GO:0071347; GO:0071356; GO:0008009; GO:0070098; GO:0006935; GO:0005615; GO:0006955; GO:0006954; GO:0048247; GO:0002548; GO:0030593; GO:0070374; GO:0043547; GO:0030838; GO:0030335; GO:0001938; GO:0050729; GO:0007165	Evidence at protein level	SUBCELLULAR LOCATION: Secreted.			SIGNAL 1 23 {ECO:0000269|PubMed:10488147}.
Q49AH0	CDNF	GO:0005576	Evidence at protein level	SUBCELLULAR LOCATION: Secreted {ECO:0000269|PubMed:17611540, ECO:0000269|PubMed:18561914}.			SIGNAL 1 24 {ECO:0000255}.
P11597	CETP	GO:0015485; GO:0042632; GO:0008203; GO:0030301; GO:0017127; GO:0070062; GO:0005576; GO:0005615; GO:0034364; GO:0034375; GO:0008289; GO:0055088; GO:0006869; GO:0005319; GO:0042157; GO:0034374; GO:0010745; GO:0031210; GO:0046470; GO:0055091; GO:0015914; GO:0005548; GO:0006898; GO:0010874; GO:0043691; GO:0017129; GO:0070328; GO:0006641; GO:0034197; GO:0034372; GO:0031982	Evidence at protein level	SUBCELLULAR LOCATION: Secreted, extracellular space {ECO:0000269|PubMed:24293641}. Note=Secreted in plasma. {ECO:0000250|UniProtKB:P47896}.			SIGNAL 1 17
Q9BZP6	CHIA	GO:0006915; GO:0030246; GO:0005975; GO:0006037; GO:0008061; GO:0006032; GO:0006030; GO:0004568; GO:0005737; GO:0007586; GO:0005576; GO:0005615; GO:0006955; GO:0019900; GO:0003796; GO:0000272; GO:0090197; GO:0002532; GO:0009620	Evidence at protein level	SUBCELLULAR LOCATION: Isoform 1: Secreted. Note=Secretion depends on EGFR activity.; SUBCELLULAR LOCATION: Isoform 2: Cytoplasm.; SUBCELLULAR LOCATION: Isoform 3: Cytoplasm.			SIGNAL 1 21 {ECO:0000250}.
O43866	CD5L	GO:0006915; GO:0072562; GO:0006968; GO:0005737; GO:0070062; GO:0005576; GO:0005615; GO:0002376; GO:0006954; GO:0016020; GO:0005044	Evidence at protein level	SUBCELLULAR LOCATION: Secreted {ECO:0000269|PubMed:24223991, ECO:0000269|PubMed:24804991}. Cytoplasm {ECO:0000250|UniProtKB:Q9QWK4}. Note=Secreted by macrophages and circulates in the blood (PubMed:24223991, PubMed:24804991). Transported in the cytoplasm via CD36-mediated endocytosis (By similarity). {ECO:0000250|UniProtKB:Q9QWK4, ECO:0000269|PubMed:24223991, ECO:0000269|PubMed:24804991}.			SIGNAL 1 19 {ECO:0000269|PubMed:15340161, ECO:0000269|PubMed:8034987, ECO:0000269|PubMed:9045627}.
Q6NUI6	CHADL	GO:0005518; GO:0098633; GO:0031012; GO:0032331; GO:1904027; GO:0005578	Evidence at protein level	SUBCELLULAR LOCATION: Secreted {ECO:0000269|PubMed:25451920}. Secreted, extracellular space, extracellular matrix {ECO:0000250|UniProtKB:E9Q7T7}.			SIGNAL 1 30 {ECO:0000255}.
Q9UNI1	CELA1	GO:0016055; GO:0060309; GO:0031017; GO:0005615; GO:0006954; GO:0046872; GO:0035264; GO:0000122; GO:0061113; GO:0045766; GO:0045944; GO:0009791; GO:0045595; GO:0042127; GO:0004252; GO:0048771	Evidence at protein level	SUBCELLULAR LOCATION: Secreted.			SIGNAL 1 8 {ECO:0000250}.
P00450	CP	GO:0007568; GO:0046658; GO:0072562; GO:0006879; GO:0051087; GO:0005507; GO:0006825; GO:0070062; GO:0005576; GO:0005615; GO:0004322; GO:0001889; GO:0030324; GO:0005765; GO:0046688; GO:0007584	Evidence at protein level	SUBCELLULAR LOCATION: Secreted. Note=Colocalizes with GCP1 in secretory intracellular compartments. {ECO:0000250}.			SIGNAL 1 19 {ECO:0000269|PubMed:6582496}.
Q9Y240	CLEC11A	GO:0030246; GO:0005737; GO:0005576; GO:0005615; GO:0008083; GO:0008284	Evidence at protein level	SUBCELLULAR LOCATION: Cytoplasm {ECO:0000269|PubMed:11803813}. Secreted {ECO:0000269|PubMed:11803813}.			SIGNAL 1 21 {ECO:0000269|PubMed:9442024}.
P19835	CEL	GO:0047372; GO:0052689; GO:0003824; GO:0009986; GO:0006707; GO:0005737; GO:0070062; GO:0005576; GO:0005615; GO:0009062; GO:0008201; GO:0016787; GO:0005887; GO:0030299; GO:0044258; GO:0044241; GO:0006629; GO:0050804; GO:0042043; GO:0007158; GO:0030157; GO:0018350; GO:0004872; GO:0004771; GO:0045202; GO:0007416; GO:0004806; GO:0006641	Evidence at protein level	SUBCELLULAR LOCATION: Secreted.			SIGNAL 1 20 {ECO:0000269|PubMed:1988041}.
Q8WUJ3	CEMIP	GO:0046923; GO:0032050; GO:0030665; GO:0005905; GO:0005737; GO:0005783; GO:0005576; GO:0030213; GO:0030214; GO:0005540; GO:0004415; GO:0005634; GO:0005886; GO:0030335; GO:0010800; GO:1900020; GO:0090314; GO:0051281; GO:0007605	Evidence at protein level	SUBCELLULAR LOCATION: Nucleus. Cytoplasm. Endoplasmic reticulum. Cell membrane. Membrane, clathrin-coated pit. Secreted. Note=Retained in the endoplasmic reticulum (ER) in a HSPA5/BIP-dependent manner. Colocalized with clathrin heavy chain/CLTC in clathrin-coated vesicles. Strongly detected in the cytoplasm of breast carcinoma cells, whereas poorly detected in adjacent normal epithelial cells, st…			SIGNAL 1 30 {ECO:0000269|PubMed:24269685}.
P00751	CFB	GO:0072562; GO:0006956; GO:0006957; GO:0001848; GO:0070062; GO:0005576; GO:0005615; GO:0005886; GO:0030449; GO:0004252	Evidence at protein level	SUBCELLULAR LOCATION: Secreted.			SIGNAL 1 25 {ECO:0000269|PubMed:6546754}.
P00746	CFD	GO:0006956; GO:0006957; GO:0070062; GO:0005576; GO:0005615; GO:0031093; GO:0002576; GO:0006508; GO:0004252; GO:0008236	Evidence at protein level	SUBCELLULAR LOCATION: Secreted.			SIGNAL 1 20 {ECO:0000255}.
Q15782	CHI3L2	GO:0030246; GO:0005975; GO:0008061; GO:0005615; GO:0004553	Evidence at protein level	SUBCELLULAR LOCATION: Secreted {ECO:0000305}.			SIGNAL 1 26
Q9BWS9	CHID1	GO:0005975; GO:0008061; GO:0006032; GO:0004568; GO:0070062; GO:0005615; GO:0045087; GO:0005770; GO:0005764; GO:0016020; GO:1900016; GO:0005634; GO:0070492; GO:0005802	Evidence at protein level	SUBCELLULAR LOCATION: Secreted {ECO:0000269|PubMed:16357325}. Lysosome {ECO:0000269|PubMed:16357325}.			SIGNAL 1 19 {ECO:0000255}.
Q9H2X0	CHRD	GO:0021919; GO:0019955; GO:0005615; GO:0033504; GO:0030900; GO:0001702; GO:0008201; GO:0001707; GO:0030514; GO:0030336; GO:0045668; GO:0001649; GO:0045785; GO:0002053; GO:0001501	Evidence at protein level	SUBCELLULAR LOCATION: Secreted {ECO:0000250}.			SIGNAL 1 26 {ECO:0000255}.
A5D8T8	CLEC18A	GO:0005794; GO:0005783; GO:0005768; GO:0005615; GO:0030247	Evidence at protein level	SUBCELLULAR LOCATION: Secreted {ECO:0000269|PubMed:26170455}. Endoplasmic reticulum {ECO:0000305|PubMed:26170455}. Golgi apparatus {ECO:0000305|PubMed:26170455}. Endosome {ECO:0000305|PubMed:26170455}.			SIGNAL 1 26 {ECO:0000255}.
O75339	CILP	GO:0070062; GO:0031012; GO:0005615; GO:0043569; GO:0005578	Evidence at protein level	SUBCELLULAR LOCATION: Secreted, extracellular space, extracellular matrix {ECO:0000269|PubMed:15864306}.			SIGNAL 1 21 {ECO:0000255}.
Q9H741	C12orf49	GO:0005576	Evidence at protein level	SUBCELLULAR LOCATION: Secreted {ECO:0000305}.			SIGNAL 1 33 {ECO:0000255}.
O75596	CLEC3A	GO:0030246; GO:0005576; GO:0001501	Evidence at protein level	SUBCELLULAR LOCATION: Secreted {ECO:0000269|PubMed:19173304}.			SIGNAL 1 22 {ECO:0000269|PubMed:19173304}.
Q9UBD9	CLCF1	GO:0030183; GO:0097059; GO:0097058; GO:0007259; GO:0007166; GO:0005127; GO:0005125; GO:0019221; GO:0070062; GO:0005576; GO:0008083; GO:0005622; GO:0043524; GO:0030890; GO:0048711; GO:0008284; GO:0002639; GO:0048295; GO:0042517; GO:0046982; GO:0005102	Evidence at protein level	SUBCELLULAR LOCATION: Secreted {ECO:0000250}.			SIGNAL 1 27 {ECO:0000255}.
P02458	COL2A1	GO:0005604; GO:0001502; GO:0051216; GO:0060351; GO:0071773; GO:0007417; GO:0002062; GO:0030574; GO:0030199; GO:0005585; GO:0060272; GO:0001958; GO:0005788; GO:0031012; GO:0030198; GO:0030020; GO:0005576; GO:0005615; GO:0003007; GO:0042802; GO:0042472; GO:0060174; GO:0046872; GO:2001240; GO:0030903; GO:0071599; GO:0060021; GO:0048407; GO:0006029; GO:0010468; GO:0050776; GO:0007605; GO:0001501; GO:…	Evidence at protein level	SUBCELLULAR LOCATION: Secreted, extracellular space, extracellular matrix {ECO:0000255|PROSITE-ProRule:PRU00793}.			SIGNAL 1 25 {ECO:0000255}.
P06681	C2	GO:0006956; GO:0006958; GO:0070062; GO:0005576; GO:0005615; GO:0045087; GO:0046872; GO:2000427; GO:0030449; GO:0007584; GO:0004252	Evidence at protein level	SUBCELLULAR LOCATION: Secreted.			SIGNAL 1 20 {ECO:0000269|PubMed:10734221, ECO:0000269|PubMed:6922702}.
P08572	COL4A2	GO:0001525; GO:0071560; GO:0030574; GO:0005587; GO:0035987; GO:0005788; GO:0070062; GO:0031012; GO:0030198; GO:0005201; GO:0005576; GO:0043231; GO:0016525; GO:0006351	Evidence at protein level	SUBCELLULAR LOCATION: Secreted, extracellular space, extracellular matrix, basement membrane.			SIGNAL 1 25
Q13231	CHIT1	GO:0005975; GO:0008061; GO:0006032; GO:0004568; GO:0008843; GO:0005576; GO:0005615; GO:0004553; GO:0006955; GO:0005764; GO:0000272; GO:0009617	Evidence at protein level	SUBCELLULAR LOCATION: Secreted. Lysosome. Note=A small proportion is lysosomal.			SIGNAL 1 21 {ECO:0000269|PubMed:7836450}.
P16619	CCL3L1	GO:0048020; GO:0007186; GO:0071346; GO:0071347; GO:0071356; GO:0008009; GO:0070098; GO:0005576; GO:0005615; GO:0006954; GO:0048247; GO:0002548; GO:0008285; GO:0030593; GO:0070374; GO:0043547; GO:0050729	Evidence at protein level	SUBCELLULAR LOCATION: Secreted.			SIGNAL 1 23 {ECO:0000269|PubMed:15340161}.
A8K7I4	CLCA1	GO:0006816; GO:0071456; GO:0005254; GO:0005615; GO:0005887; GO:0005229; GO:0034220; GO:0046872; GO:0004222; GO:0005902; GO:0005886; GO:0006810; GO:0042589	Evidence at protein level	SUBCELLULAR LOCATION: Secreted, extracellular space {ECO:0000269|PubMed:15919655}. Cell membrane {ECO:0000269|PubMed:15919655}; Peripheral membrane protein {ECO:0000269|PubMed:15919655}; Extracellular side {ECO:0000269|PubMed:15919655}. Note=Protein that remains attached to the plasma membrane appeared to be predominantly localized to microvilli.			SIGNAL 1 21 {ECO:0000255}.
P12110	COL6A2	GO:0007155; GO:0030574; GO:0005581; GO:0005788; GO:0070062; GO:0031012; GO:0030198; GO:0005576; GO:0005615; GO:1903561; GO:0043234; GO:0070208; GO:0005578; GO:0009749; GO:0042383	Evidence at protein level	SUBCELLULAR LOCATION: Secreted, extracellular space, extracellular matrix {ECO:0000269|PubMed:8305732}. Membrane {ECO:0000269|PubMed:8305732}; Peripheral membrane protein {ECO:0000269|PubMed:8305732}. Note=Recruited on membranes by CSPG4.			SIGNAL 1 20 {ECO:0000255}.
P12111	COL6A3	GO:0007155; GO:0030574; GO:0005589; GO:0005788; GO:0070062; GO:0031012; GO:0030198; GO:0005576; GO:0005615; GO:1903561; GO:0007517; GO:0005578; GO:0042383; GO:0004867	Evidence at protein level	SUBCELLULAR LOCATION: Secreted, extracellular space, extracellular matrix {ECO:0000250}.			SIGNAL 1 25 {ECO:0000255}.
P06276	BCHE	GO:0003990; GO:0001540; GO:0072562; GO:0003824; GO:0033265; GO:0019695; GO:0004104; GO:0050783; GO:0005788; GO:0019899; GO:0005576; GO:0016788; GO:0042802; GO:0007612; GO:0016020; GO:0008285; GO:0050805; GO:0014016; GO:0005641; GO:0043279; GO:0042493; GO:0051593; GO:0051384	Evidence at protein level	SUBCELLULAR LOCATION: Secreted {ECO:0000269|PubMed:19368529, ECO:0000269|PubMed:19542320}.			SIGNAL 1 28 {ECO:0000269|PubMed:20946535, ECO:0000269|PubMed:3542989}.
Q9Y6N3	CLCA3P	GO:0005262; GO:0005254; GO:0034707; GO:0005615; GO:0034220; GO:0004222; GO:0005886; GO:0006810; GO:0005215; GO:0005244	Evidence at protein level	SUBCELLULAR LOCATION: Secreted {ECO:0000269|PubMed:10095065}.			SIGNAL 1 20 {ECO:0000255}.
Q9H972	C14orf93	GO:0005576; GO:0044822	Evidence at protein level	SUBCELLULAR LOCATION: Secreted {ECO:0000305}.			SIGNAL 1 17 {ECO:0000255}.
P02461	COL3A1	GO:0007568; GO:0060414; GO:0007160; GO:0071230; GO:0021987; GO:0030574; GO:0030199; GO:0005586; GO:0048565; GO:0005788; GO:0043206; GO:0031012; GO:0030198; GO:0005201; GO:0005576; GO:0005615; GO:0007507; GO:0005178; GO:0007229; GO:0046872; GO:0050777; GO:2001223; GO:0018149; GO:0030168; GO:0048407; GO:0035025; GO:0050776; GO:0034097; GO:0009612; GO:0009314; GO:0001501; GO:0043588; GO:0007179; GO:…	Evidence at protein level	SUBCELLULAR LOCATION: Secreted, extracellular space, extracellular matrix {ECO:0000255|PROSITE-ProRule:PRU00793}.			SIGNAL 1 23
P0C0L4	C4A	GO:0072562; GO:0006956; GO:0006958; GO:0001849; GO:0004866; GO:0070062; GO:0005576; GO:0005615; GO:0006954; GO:0045087; GO:0005886; GO:2000427; GO:0030449; GO:0004252	Evidence at protein level	SUBCELLULAR LOCATION: Secreted.			SIGNAL 1 19
P01031	C5	GO:0007186; GO:0000187; GO:0007166; GO:0008009; GO:0006935; GO:0006956; GO:0006957; GO:0006958; GO:0019835; GO:0004866; GO:0070062; GO:0005576; GO:0005615; GO:0001701; GO:0006954; GO:0005579; GO:0098779; GO:0010760; GO:0045766; GO:0090197; GO:0010575; GO:0005102; GO:0030449; GO:0006950	Evidence at protein level	SUBCELLULAR LOCATION: Secreted.			SIGNAL 1 18 {ECO:0000255}.
P12107	COL11A1	GO:0001502; GO:0002063; GO:0030574; GO:0030199; GO:0005592; GO:0050910; GO:0048704; GO:0035987; GO:0005788; GO:0050840; GO:0030198; GO:0005201; GO:0005576; GO:0042472; GO:0046872; GO:0001503; GO:0030674; GO:0006029; GO:0007605; GO:0035989; GO:0055010; GO:0007601	Evidence at protein level	SUBCELLULAR LOCATION: Secreted, extracellular space, extracellular matrix {ECO:0000255|PROSITE-ProRule:PRU00793}.			SIGNAL 1 35 {ECO:0000255}.
Q6UWK7	GPR15L	GO:0050830; GO:0050832; GO:0005576; GO:0005615; GO:1902807; GO:0051782	Evidence at protein level	SUBCELLULAR LOCATION: Secreted {ECO:0000269|PubMed:25351403, ECO:0000269|PubMed:25585381}.			SIGNAL 1 24 {ECO:0000269|PubMed:25351403}.
P53420	COL4A4	GO:0005605; GO:0030574; GO:0005587; GO:0005788; GO:0030198; GO:0005201; GO:0005576; GO:0032836	Evidence at protein level	SUBCELLULAR LOCATION: Secreted, extracellular space, extracellular matrix, basement membrane {ECO:0000255|PROSITE-ProRule:PRU00736}. Note=Colocalizes with COL4A4 and COL4A5 in GBM, tubular basement membrane (TBM) and synaptic basal lamina (BL). {ECO:0000250}.			SIGNAL 1 38 {ECO:0000255}.
P29400	COL4A5	GO:0005605; GO:0030574; GO:0005587; GO:0005788; GO:0030198; GO:0005201; GO:0005576; GO:0031594; GO:0007528	Evidence at protein level	SUBCELLULAR LOCATION: Secreted, extracellular space, extracellular matrix, basement membrane.			SIGNAL 1 26 {ECO:0000255}.
P0C0L5	C4B	GO:0072562; GO:0030246; GO:0006956; GO:0006958; GO:0001848; GO:0032490; GO:0004866; GO:0070062; GO:0005576; GO:0005615; GO:0006954; GO:0045087; GO:0008228; GO:0044216; GO:0005886; GO:2000427; GO:0030449; GO:0004252	Evidence at protein level	SUBCELLULAR LOCATION: Secreted.			SIGNAL 1 19
P05997	COL5A2	GO:0071230; GO:0030574; GO:0030199; GO:0005588; GO:0005788; GO:0031012; GO:0030198; GO:0005201; GO:0005576; GO:0048592; GO:0046872; GO:1903225; GO:0001503; GO:0001501; GO:0043588	Evidence at protein level	SUBCELLULAR LOCATION: Secreted, extracellular space, extracellular matrix {ECO:0000255|PROSITE-ProRule:PRU00793}.			SIGNAL 1 26
Q02388	COL7A1	GO:0048208; GO:0030134; GO:0006888; GO:0000139; GO:0005604; GO:0007155; GO:0030574; GO:0005590; GO:0035987; GO:0005788; GO:0033116; GO:0008544; GO:0030198; GO:0005576; GO:0005615; GO:0004867	Evidence at protein level	SUBCELLULAR LOCATION: Secreted, extracellular space, extracellular matrix, basement membrane.			SIGNAL 1 16 {ECO:0000255}.
P27658	COL8A1	GO:0001525; GO:0048593; GO:0007155; GO:0030574; GO:0005591; GO:0035987; GO:0005788; GO:0050673; GO:0070062; GO:0030198; GO:0005576; GO:0043231; GO:0010811	Evidence at protein level	SUBCELLULAR LOCATION: Secreted, extracellular space, extracellular matrix, basement membrane.			SIGNAL 1 27 {ECO:0000255}.
P25067	COL8A2	GO:0001525; GO:0005604; GO:0048593; GO:0030574; GO:0005581; GO:0005788; GO:0050673; GO:0030198; GO:0005201; GO:0005576; GO:0030674; GO:0005578; GO:0016337	Evidence at protein level	SUBCELLULAR LOCATION: Secreted, extracellular space, extracellular matrix, basement membrane.			SIGNAL 1 28 {ECO:0000255}.
P04118	CLPS	GO:0008047; GO:0070062; GO:0005576; GO:0016042; GO:0044241; GO:0006629; GO:0009791; GO:0032094; GO:0001523	Evidence at protein level	SUBCELLULAR LOCATION: Secreted.			SIGNAL 1 17
P10643	C7	GO:0006956; GO:0006957; GO:0006958; GO:0019835; GO:0070062; GO:0005576; GO:0005579; GO:0030449	Evidence at protein level	SUBCELLULAR LOCATION: Secreted.			SIGNAL 1 22
P07358	C8B	GO:0006956; GO:0006957; GO:0006958; GO:0019835; GO:0070062; GO:0005576; GO:0005615; GO:1903561; GO:0006955; GO:0016020; GO:0005579; GO:0030449	Evidence at protein level	SUBCELLULAR LOCATION: Secreted.			SIGNAL 1 32 {ECO:0000255}.
Q14055	COL9A2	GO:0005594; GO:0005788; GO:0030198; GO:0030020; GO:0005576; GO:0005578; GO:0001501	Evidence at protein level	SUBCELLULAR LOCATION: Secreted, extracellular space, extracellular matrix {ECO:0000250}.			SIGNAL 1 23 {ECO:0000255}.
P39060	COL18A1	GO:0001525; GO:0005604; GO:0007155; GO:0030574; GO:0005581; GO:0005788; GO:0001886; GO:0070062; GO:0031012; GO:0030198; GO:0005576; GO:0005615; GO:0042802; GO:0046872; GO:0008285; GO:0009887; GO:0030335; GO:0008284; GO:2000353; GO:0042493; GO:0051599; GO:0005198; GO:0007601	Evidence at protein level	SUBCELLULAR LOCATION: Secreted, extracellular space, extracellular matrix {ECO:0000250}.			SIGNAL 1 23 {ECO:0000255}.
Q9P218	COL20A1	GO:0005581; GO:0005788; GO:0005576; GO:0005615	Evidence at protein level	SUBCELLULAR LOCATION: Secreted, extracellular space {ECO:0000305}.			SIGNAL 1 22 {ECO:0000255}.
P49747	COMP	GO:0006915; GO:0005509; GO:0007155; GO:0005518; GO:0070062; GO:0030198; GO:0005201; GO:0005576; GO:0005615; GO:0003417; GO:0043395; GO:0008201; GO:0060173; GO:0043066; GO:0009887; GO:0002020; GO:0005578; GO:0001501	Evidence at protein level	SUBCELLULAR LOCATION: Secreted, extracellular space, extracellular matrix.			SIGNAL 1 20 {ECO:0000255}.
Q96A83	COL26A1	GO:0005794; GO:0030574; GO:0005581; GO:0005788; GO:0031012; GO:0005576; GO:0005886; GO:0010811; GO:0005578	Evidence at protein level	SUBCELLULAR LOCATION: Secreted, extracellular space, extracellular matrix.			SIGNAL 1 20 {ECO:0000255}.
Q8IZC6	COL27A1	GO:0005788; GO:0030198; GO:0005201; GO:0005576; GO:0005583; GO:0003431; GO:0046872	Evidence at protein level	SUBCELLULAR LOCATION: Secreted, extracellular space, extracellular matrix. Note=Found on some small banded collagen fibrils and meshworks. {ECO:0000250}.			SIGNAL 1 41 {ECO:0000255}.
P10909	CLU	GO:0005794; GO:0016235; GO:0007568; GO:0097440; GO:0072562; GO:0000902; GO:0009986; GO:0071363; GO:0032286; GO:0051087; GO:0051131; GO:0061077; GO:0042583; GO:0006956; GO:0006958; GO:0005737; GO:0005829; GO:0031018; GO:0005783; GO:0044849; GO:0070062; GO:0031012; GO:0005576; GO:0005615; GO:0030426; GO:0045087; GO:0005622; GO:0097193; GO:0006629; GO:0001774; GO:0061518; GO:0051787; GO:0031966; GO:…	Evidence at protein level	SUBCELLULAR LOCATION: Isoform 1: Secreted. Note=Can retrotranslocate from the secretory compartments to the cytosol upon cellular stress.; SUBCELLULAR LOCATION: Nucleus. Cytoplasm. Mitochondrion membrane; Peripheral membrane protein; Cytoplasmic side. Cytoplasm, cytosol. Microsome. Endoplasmic reticulum. Cytoplasmic vesicle, secretory vesicle, chromaffin granule {ECO:0000250}. Note=Isoforms lacki…			SIGNAL 1 22 {ECO:0000269|PubMed:1903064, ECO:0000269|PubMed:2387851, ECO:0000269|PubMed:2601725, ECO:0000269|PubMed:2780565, ECO:0000269|PubMed:3154963, ECO:0000269|PubMed:8328966}.
P23946	CMA1	GO:0002003; GO:0071333; GO:0005737; GO:0004175; GO:0022617; GO:0005576; GO:0006955; GO:0050720; GO:0043231; GO:0030901; GO:0042277; GO:0045766; GO:0016485; GO:0050727; GO:0004252; GO:0008236	Evidence at protein level	SUBCELLULAR LOCATION: Secreted. Cytoplasmic granule. Note=Mast cell granules.			SIGNAL 1 19
P10645	CHGA	GO:0086030; GO:0042583; GO:0050829; GO:0050830; GO:0050832; GO:0005615; GO:0045087; GO:0031640; GO:0045576; GO:0002551; GO:0032762; GO:0043303; GO:0042629; GO:0033604; GO:1901215; GO:0045908; GO:0006996; GO:0042698; GO:0048471; GO:0030816; GO:0060452; GO:2000707; GO:1900738; GO:1901899; GO:0008217; GO:0002026; GO:0030141; GO:0030658	Evidence at protein level	SUBCELLULAR LOCATION: Cytoplasmic vesicle, secretory vesicle lumen {ECO:0000250}. Cytoplasmic vesicle, secretory vesicle membrane {ECO:0000250}. Secreted. Note=Associated with the secretory granule membrane through direct interaction to SCG3 that in turn binds to cholesterol-enriched lipid rafts in intragranular conditions. {ECO:0000250}.; SUBCELLULAR LOCATION: Serpinin: Secreted {ECO:0000250|Uni…			SIGNAL 1 18 {ECO:0000269|PubMed:12442257, ECO:0000269|PubMed:3704195}.
P20908	COL5A1	GO:0005604; GO:0001568; GO:0007155; GO:0016477; GO:0032964; GO:0030574; GO:0030199; GO:0005588; GO:0005788; GO:0070062; GO:0043206; GO:0031012; GO:0030198; GO:0005201; GO:0005576; GO:0048592; GO:0003007; GO:0008201; GO:0005178; GO:0045112; GO:0046872; GO:1903225; GO:0048407; GO:0043394; GO:0051128; GO:0043588; GO:0035989; GO:0035313	Evidence at protein level	SUBCELLULAR LOCATION: Secreted, extracellular space, extracellular matrix {ECO:0000255|PROSITE-ProRule:PRU00793}.			SIGNAL 1 37 {ECO:0000255}.
P25940	COL5A3	GO:0007160; GO:0005518; GO:0030574; GO:0030199; GO:0005588; GO:0005788; GO:0070062; GO:0030198; GO:0005201; GO:0005576; GO:0008201; GO:0043588	Evidence at protein level	SUBCELLULAR LOCATION: Secreted, extracellular space, extracellular matrix {ECO:0000255|PROSITE-ProRule:PRU00793}.			SIGNAL 1 29 {ECO:0000255}.
A6NMZ7	COL6A6	GO:0007155; GO:0030574; GO:0005581; GO:0005576; GO:0005578	Evidence at protein level	SUBCELLULAR LOCATION: Secreted, extracellular space, extracellular matrix {ECO:0000250}. Note=Deposed in the extracellular matrix of skeletal muscle. {ECO:0000250}.			SIGNAL 1 19 {ECO:0000255}.
Q03692	COL10A1	GO:0051216; GO:0005938; GO:0030574; GO:0005581; GO:0001958; GO:0005788; GO:0030198; GO:0005576; GO:0046872; GO:0005578; GO:0001501	Evidence at protein level	SUBCELLULAR LOCATION: Secreted, extracellular space, extracellular matrix {ECO:0000250}.			SIGNAL 1 18 {ECO:0000255}.
O43405	COCH	GO:0005518; GO:0042742; GO:0070062; GO:0031012; GO:0045089; GO:0005578; GO:0008360; GO:0007605	Evidence at protein level	SUBCELLULAR LOCATION: Secreted, extracellular space, extracellular matrix {ECO:0000269|PubMed:12843317, ECO:0000269|PubMed:22610276}.			SIGNAL 1 24 {ECO:0000255}.
Q05707	COL14A1	GO:0005518; GO:0030199; GO:0005581; GO:0005596; GO:0005788; GO:0070062; GO:0030198; GO:0005201; GO:0005576; GO:0005615; GO:0044822; GO:0030674; GO:0005578; GO:0016337	Evidence at protein level	SUBCELLULAR LOCATION: Secreted, extracellular space, extracellular matrix {ECO:0000250|UniProtKB:P32018}.			SIGNAL 1 28 {ECO:0000255}.
Q96KN2	CNDP1	GO:0004180; GO:0005829; GO:0016805; GO:0005576; GO:0046872; GO:0008237; GO:0006508; GO:0032268; GO:0034701	Evidence at protein level	SUBCELLULAR LOCATION: Secreted.			SIGNAL 1 26 {ECO:0000255}.
P02452	COL1A1	GO:0005794; GO:0007596; GO:0001568; GO:0060346; GO:0060351; GO:0071230; GO:0071364; GO:0044344; GO:1902618; GO:0071260; GO:0071300; GO:0071560; GO:0071356; GO:0071306; GO:0032964; GO:0030574; GO:0030199; GO:0005584; GO:0048706; GO:0001958; GO:0005788; GO:0031012; GO:0030198; GO:0005201; GO:0005576; GO:0005615; GO:0060325; GO:0042802; GO:0001957; GO:0050900; GO:0046872; GO:0010812; GO:0001649; GO:…	Evidence at protein level	SUBCELLULAR LOCATION: Secreted, extracellular space, extracellular matrix {ECO:0000255|PROSITE-ProRule:PRU00793}.			SIGNAL 1 22
P08123	COL1A2	GO:0007266; GO:0007596; GO:0001568; GO:0071230; GO:0030574; GO:0030199; GO:0005584; GO:0005788; GO:0070062; GO:0031012; GO:0030198; GO:0005201; GO:0005576; GO:0005615; GO:0042802; GO:0050900; GO:0046872; GO:0042476; GO:0030168; GO:0048407; GO:0030674; GO:0070208; GO:0008217; GO:0050776; GO:0001501; GO:0043589; GO:0007179	Evidence at protein level	SUBCELLULAR LOCATION: Secreted, extracellular space, extracellular matrix {ECO:0000255|PROSITE-ProRule:PRU00793}.			SIGNAL 1 22 {ECO:0000250|UniProtKB:P02466}.
P01024	C3	GO:0031715; GO:0007186; GO:0007596; GO:0072562; GO:0048037; GO:0006956; GO:0006957; GO:0006958; GO:0004866; GO:0070062; GO:0005576; GO:0005615; GO:0006631; GO:0006955; GO:0006954; GO:0008289; GO:0005886; GO:0070374; GO:0045745; GO:0001970; GO:0045766; GO:2000427; GO:0048639; GO:0010828; GO:0010884; GO:0001934; GO:0001798; GO:0010575; GO:0005102; GO:0030449; GO:0050776; GO:0010866; GO:0032355; GO:…	Evidence at protein level	SUBCELLULAR LOCATION: Secreted.			SIGNAL 1 22 {ECO:0000269|PubMed:8376604}.
P02462	COL4A1	GO:0005604; GO:0071711; GO:0048514; GO:0007420; GO:0071230; GO:0030574; GO:0005587; GO:0005788; GO:0030855; GO:0031012; GO:0030023; GO:0030198; GO:0005201; GO:0005576; GO:0007528; GO:0001569; GO:0048407; GO:0061333; GO:0061304	Evidence at protein level	SUBCELLULAR LOCATION: Secreted, extracellular space, extracellular matrix, basement membrane.			SIGNAL 1 27 {ECO:0000269|PubMed:4043082}.
Q01955	COL4A3	GO:0006919; GO:0005604; GO:0008015; GO:0007155; GO:0008283; GO:0007166; GO:0030574; GO:0005587; GO:0005783; GO:0005788; GO:0072577; GO:0030198; GO:0005201; GO:0005576; GO:0032836; GO:0005178; GO:0043231; GO:0008191; GO:0016525; GO:0008285; GO:0007605; GO:0005198	Evidence at protein level	SUBCELLULAR LOCATION: Secreted, extracellular space, extracellular matrix, basement membrane. Note=Colocalizes with COL4A4 and COL4A5 in GBM, tubular basement membrane (TBM) and synaptic basal lamina (BL). {ECO:0000250}.			SIGNAL 1 28 {ECO:0000255}.
Q14031	COL4A6	GO:0007155; GO:0030574; GO:0005587; GO:0005788; GO:0030198; GO:0005201; GO:0005576	Evidence at protein level	SUBCELLULAR LOCATION: Secreted, extracellular space, extracellular matrix, basement membrane.			SIGNAL 1 22 {ECO:0000255}.
Q14050	COL9A3	GO:0005594; GO:0005788; GO:0030198; GO:0030020; GO:0005576; GO:0008585; GO:0008584; GO:0005578	Evidence at protein level	SUBCELLULAR LOCATION: Secreted, extracellular space, extracellular matrix {ECO:0000250}.			SIGNAL 1 25 {ECO:0000255}.
Q07092	COL16A1	GO:0007155; GO:0033627; GO:0071230; GO:0005597; GO:0005788; GO:0030198; GO:0005576; GO:0007565; GO:0033622; GO:0005178; GO:0007229; GO:0051894; GO:0005578	Evidence at protein level	SUBCELLULAR LOCATION: Secreted, extracellular space, extracellular matrix {ECO:0000269|PubMed:9022684}.			SIGNAL 1 21 {ECO:0000269|PubMed:15165854, ECO:0000269|PubMed:7882999}.
Q6UWE3	CLPSL2	GO:0007586; GO:0008047; GO:0005576; GO:0016042	Evidence at protein level	SUBCELLULAR LOCATION: Secreted {ECO:0000305}.			SIGNAL 1 21 {ECO:0000269|PubMed:15340161}.
P22792	CPN2	GO:0072562; GO:0030234; GO:0070062; GO:0005576; GO:0050821	Evidence at protein level	SUBCELLULAR LOCATION: Secreted.			SIGNAL 1 21 {ECO:0000255}.
Q6UXH1	CRELD2	GO:0005794; GO:0005509; GO:0005783; GO:0005615	Evidence at protein level	SUBCELLULAR LOCATION: Secreted {ECO:0000305}. Endoplasmic reticulum {ECO:0000269|PubMed:16238698}.			SIGNAL 1 24 {ECO:0000269|PubMed:15340161}.
P12109	COL6A1	GO:0007155; GO:0071230; GO:0030574; GO:0005589; GO:0035987; GO:0005788; GO:0070062; GO:0031012; GO:0030198; GO:0005576; GO:0005765; GO:0016020; GO:0001649; GO:0048407; GO:0043234; GO:0070208; GO:0042383	Evidence at protein level	SUBCELLULAR LOCATION: Secreted, extracellular space, extracellular matrix {ECO:0000250}.			SIGNAL 1 19
A8TX70	COL6A5	GO:0007155; GO:0030574; GO:0005581; GO:0005576; GO:0005578	Evidence at protein level	SUBCELLULAR LOCATION: Secreted, extracellular space, extracellular matrix {ECO:0000250}. Note=Deposed in the extracellular matrix of skeletal muscle. {ECO:0000250}.			SIGNAL 1 18 {ECO:0000255}.
P13671	C6	GO:0006956; GO:0006958; GO:0019835; GO:0070062; GO:0005576; GO:0001701; GO:0045087; GO:0005579; GO:0001970; GO:0045766; GO:0030449	Evidence at protein level	SUBCELLULAR LOCATION: Secreted.			SIGNAL 1 21 {ECO:0000269|PubMed:2808363}.
P07357	C8A	GO:0072562; GO:0006956; GO:0006957; GO:0006958; GO:0019835; GO:0070062; GO:0005576; GO:0005615; GO:0006955; GO:0016020; GO:0005579; GO:0030449	Evidence at protein level	SUBCELLULAR LOCATION: Secreted. Cell membrane; Multi-pass membrane protein. Note=Secreted as soluble protein. Inserts into the cell membrane of target cells.			SIGNAL 1 20 {ECO:0000255}.
P07360	C8G	GO:0072562; GO:0006957; GO:0006958; GO:0019835; GO:0070062; GO:0005576; GO:0005579; GO:0030449; GO:0019841	Evidence at protein level	SUBCELLULAR LOCATION: Secreted.			SIGNAL 1 20
P20849	COL9A1	GO:0002062; GO:0005594; GO:0005788; GO:0030198; GO:0030020; GO:0005576; GO:0046872; GO:0009887; GO:0005578	Evidence at protein level	SUBCELLULAR LOCATION: Secreted, extracellular space, extracellular matrix {ECO:0000250}.			SIGNAL 1 23
Q9BWP8	COLEC11	GO:0005581; GO:0006956; GO:0032502; GO:0005576; GO:0005537; GO:0007275; GO:0006898; GO:0004252	Evidence at protein level	SUBCELLULAR LOCATION: Secreted {ECO:0000305}.			SIGNAL 1 25 {ECO:0000255}.
P01189	POMC	GO:0001664; GO:0007267; GO:0033059; GO:0005737; GO:0005576; GO:0005615; GO:0006091; GO:0042593; GO:0005179; GO:0032720; GO:0005184; GO:0007218; GO:0016486; GO:0005782; GO:0045944; GO:0005102; GO:0032098; GO:0008217; GO:2000852; GO:0070873; GO:0030141; GO:0034774; GO:0007165; GO:0070996; GO:0031781; GO:0031782	Evidence at protein level	SUBCELLULAR LOCATION: Secreted.			SIGNAL 1 26 {ECO:0000269|PubMed:15340161, ECO:0000269|PubMed:6267033, ECO:0000269|PubMed:6945581}.
Q0P5P2	C17orf67	GO:0005576	Evidence at protein level	SUBCELLULAR LOCATION: Secreted {ECO:0000305}.			SIGNAL 1 42 {ECO:0000255}.
Q6WN34	CHRDL2	GO:0051216; GO:0030154; GO:0005737; GO:0005615; GO:0001503	Evidence at protein level	SUBCELLULAR LOCATION: Isoform 1: Secreted {ECO:0000305}.; SUBCELLULAR LOCATION: Isoform 2: Secreted {ECO:0000305}.; SUBCELLULAR LOCATION: Isoform 3: Cytoplasm {ECO:0000305}.; SUBCELLULAR LOCATION: Isoform 4: Cytoplasm {ECO:0000305}.; SUBCELLULAR LOCATION: Isoform 5: Cytoplasm {ECO:0000305}.			SIGNAL 1 25 {ECO:0000269|PubMed:15340161}.
P54108	CRISP3	GO:0006952; GO:0070062; GO:0005576; GO:0005615; GO:0045087; GO:0005578; GO:0042581	Evidence at protein level	SUBCELLULAR LOCATION: Secreted. Note=In neutrophils, localized in specific granules.			SIGNAL 1 20 {ECO:0000255}.
P02741	CRP	GO:0006953; GO:0005509; GO:0033265; GO:0001849; GO:0050830; GO:0070062; GO:0005576; GO:0005615; GO:0006954; GO:0030169; GO:0050750; GO:0010888; GO:0010745; GO:0045908; GO:0008228; GO:0010628; GO:0032930; GO:2000482	Evidence at protein level	SUBCELLULAR LOCATION: Secreted.			SIGNAL 1 18 {ECO:0000269|PubMed:762075}.
P13942	COL11A2	GO:0051216; GO:0030574; GO:0030199; GO:0005592; GO:0005788; GO:0030020; GO:0005576; GO:0046872; GO:0060021; GO:0030674; GO:0007605; GO:0001501; GO:0060023	Evidence at protein level	SUBCELLULAR LOCATION: Secreted, extracellular space, extracellular matrix {ECO:0000255|PROSITE-ProRule:PRU00793}.			SIGNAL 1 27 {ECO:0000255}.
Q99715	COL12A1	GO:0007155; GO:0030574; GO:0030199; GO:0005595; GO:0035987; GO:0005788; GO:0070062; GO:0031012; GO:0030020; GO:0005576; GO:0005615; GO:1903561; GO:0001501	Evidence at protein level	SUBCELLULAR LOCATION: Secreted, extracellular space, extracellular matrix {ECO:0000250}.			SIGNAL 1 23 {ECO:0000255}.
P39059	COL15A1	GO:0001525; GO:0007155; GO:0030154; GO:0030574; GO:0005582; GO:0005788; GO:0070062; GO:0005201; GO:0005576; GO:0005615; GO:0016021; GO:0007165	Evidence at protein level	SUBCELLULAR LOCATION: Secreted, extracellular space, extracellular matrix {ECO:0000250}.			SIGNAL 1 27 {ECO:0000255}.
Q14993	COL19A1	GO:0007155; GO:0030154; GO:0030574; GO:0005581; GO:0005788; GO:0030198; GO:0005201; GO:0005576; GO:0030674; GO:0005578; GO:0016337; GO:0007519; GO:0001501	Evidence at protein level	SUBCELLULAR LOCATION: Secreted, extracellular space, extracellular matrix {ECO:0000250}.			SIGNAL 1 23 {ECO:0000255}.
Q17RW2	COL24A1	GO:0005581; GO:0005788; GO:0005201; GO:0005576; GO:0002244; GO:0005578	Evidence at protein level	SUBCELLULAR LOCATION: Secreted, extracellular space, extracellular matrix {ECO:0000255|PROSITE-ProRule:PRU00793}.			SIGNAL 1 35 {ECO:0000255}.
O75718	CRTAP	GO:0061077; GO:0005783; GO:0005788; GO:0005615; GO:0032991; GO:1901874; GO:0018400; GO:0032403; GO:0050821; GO:0005578; GO:0007283	Evidence at protein level	SUBCELLULAR LOCATION: Secreted, extracellular space, extracellular matrix {ECO:0000250}.			SIGNAL 1 26 {ECO:0000255}.
P09919	CSF3	GO:0071345; GO:0071222; GO:0005125; GO:0019221; GO:0019899; GO:0005576; GO:0005615; GO:0005130; GO:0030851; GO:0008083; GO:0006955; GO:0007275; GO:1901215; GO:2000251; GO:0030838; GO:0008284; GO:0045639; GO:0033138; GO:0050731; GO:0014068; GO:0032092; GO:0051897; GO:0042993; GO:0045944	Evidence at protein level	SUBCELLULAR LOCATION: Secreted.			SIGNAL 1 29 {ECO:0000305|PubMed:8554326}.
P0DML2	CSH1	GO:0060397; GO:0005783; GO:0005576; GO:0031988; GO:0046872	Evidence at protein level	SUBCELLULAR LOCATION: Secreted.			SIGNAL 1 26 {ECO:0000269|PubMed:4712450, ECO:0000269|PubMed:5286363}.
P13611	VCAN	GO:0005796; GO:0005509; GO:0030246; GO:0007155; GO:0008037; GO:0007417; GO:0030206; GO:0030207; GO:0030208; GO:0031012; GO:0030198; GO:0005201; GO:0005576; GO:0005615; GO:0008347; GO:0005539; GO:0030203; GO:0005540; GO:0043231; GO:0043202; GO:0016020; GO:0007275; GO:0001649; GO:0005578; GO:0001501	Evidence at protein level	SUBCELLULAR LOCATION: Secreted, extracellular space, extracellular matrix.			SIGNAL 1 20 {ECO:0000269|PubMed:1429726}.
Q8IUH2	CREG2	GO:0010181; GO:0005794; GO:0005783; GO:0005576; GO:0016491	Evidence at protein level	SUBCELLULAR LOCATION: Secreted {ECO:0000269|PubMed:12408961}.			SIGNAL 1 31 {ECO:0000255}.
P04141	CSF2	GO:0000165; GO:0005088; GO:0071222; GO:0097028; GO:0001892; GO:0042045; GO:0005576; GO:0005615; GO:0005129; GO:0006955; GO:0005622; GO:0042116; GO:0043011; GO:0045918; GO:2001240; GO:0045740; GO:0008284; GO:0010628; GO:0032747; GO:0010744; GO:0071803; GO:0042523; GO:0004713	Evidence at protein level	SUBCELLULAR LOCATION: Secreted.			SIGNAL 1 17
Q9Y426	C2CD2	GO:0005829; GO:0005576; GO:0005634	Evidence at protein level	SUBCELLULAR LOCATION: Secreted {ECO:0000305}.			SIGNAL 1 41 {ECO:0000255}.
Q8IZJ3	CPAMD8	GO:0005615; GO:0005886; GO:0004867	Evidence at protein level	SUBCELLULAR LOCATION: Secreted {ECO:0000305|PubMed:15177561}. Cell membrane {ECO:0000269|PubMed:15177561}; Peripheral membrane protein {ECO:0000269|PubMed:15177561}; Extracellular side {ECO:0000269|PubMed:15177561}.			SIGNAL 1 25 {ECO:0000255}.
Q6UX52	C17orf99	GO:0005576	Evidence at protein level	SUBCELLULAR LOCATION: Secreted {ECO:0000305}.			SIGNAL 1 20 {ECO:0000269|PubMed:15340161}.
Q2VPA4	CR1L	GO:0005737; GO:0005576; GO:0016020; GO:0043235	Evidence at protein level	SUBCELLULAR LOCATION: Cytoplasm {ECO:0000269|PubMed:14687939}. Membrane {ECO:0000269|PubMed:14687939}. Secreted {ECO:0000269|PubMed:14687939}. Note=Predominantly found in association with the membrane fraction, but also located in the cytoplasm and in the supernatant.			SIGNAL 1 32 {ECO:0000255}.
Q9BU40	CHRDL1	GO:0030509; GO:0030154; GO:0048749; GO:0005576; GO:0001654; GO:0030514; GO:0007399; GO:0001503	Evidence at protein level	SUBCELLULAR LOCATION: Secreted {ECO:0000305}.			SIGNAL 1 21 {ECO:0000255}.
O75629	CREG1	GO:0010181; GO:0008283; GO:0070062; GO:0005615; GO:0007275; GO:0016491; GO:0040008; GO:0006357; GO:0003714; GO:0005667	Evidence at protein level	SUBCELLULAR LOCATION: Secreted {ECO:0000269|PubMed:10815803}.			SIGNAL 1 31 {ECO:0000269|PubMed:15340161}.
O95715	CXCL14	GO:0005794; GO:0007267; GO:0008009; GO:0006935; GO:0005615; GO:0006955; GO:0048839; GO:0045662; GO:2000503; GO:0007165	Evidence at protein level	SUBCELLULAR LOCATION: Secreted.			SIGNAL 1 34 {ECO:0000269|PubMed:10946286}.
P24387	CRHBP	GO:0043679; GO:0048149; GO:0071320; GO:0071277; GO:0071314; GO:0035690; GO:0071392; GO:0071391; GO:0097211; GO:0035865; GO:0033554; GO:0071356; GO:0051424; GO:0030425; GO:0031045; GO:0005615; GO:0007565; GO:0042445; GO:0009755; GO:0006954; GO:0005622; GO:0007611; GO:0002125; GO:0005874; GO:0005771; GO:0051460; GO:1900011; GO:0005634; GO:0042277; GO:0043204; GO:0045055; GO:2000310; GO:0051459; GO:…	Evidence at protein level	SUBCELLULAR LOCATION: Secreted.			SIGNAL 1 24
P16562	CRISP2	GO:0005615; GO:0016337	Evidence at protein level	SUBCELLULAR LOCATION: Secreted {ECO:0000305}.			SIGNAL 1 21 {ECO:0000255}.
O75462	CRLF1	GO:0097058; GO:0019955; GO:0005576; GO:0005615; GO:2000672; GO:0043524; GO:0008284; GO:0042517; GO:0046982; GO:0004872; GO:0001657	Evidence at protein level	SUBCELLULAR LOCATION: Secreted {ECO:0000269|PubMed:9686600}.			SIGNAL 1 37 {ECO:0000269|PubMed:15340161}.
P29279	CCN2	GO:0071897; GO:0005794; GO:0001525; GO:0001502; GO:0007155; GO:0005938; GO:0030154; GO:0016477; GO:0007267; GO:0007160; GO:0035988; GO:0005801; GO:0005829; GO:0060401; GO:0008544; GO:0070278; GO:0005576; GO:0005615; GO:0008543; GO:0008201; GO:0005520; GO:0005178; GO:0007229; GO:0043231; GO:0035556; GO:0030324; GO:0060548; GO:0010629; GO:0010260; GO:0001503; GO:0048471; GO:0005886; GO:0070374; GO:…	Evidence at protein level	SUBCELLULAR LOCATION: Secreted, extracellular space, extracellular matrix {ECO:0000250}. Secreted {ECO:0000250}.			SIGNAL 1 26 {ECO:0000255}.
P19875	CXCL2	GO:0045236; GO:0007186; GO:0008009; GO:0070098; GO:0006935; GO:0005576; GO:0005615; GO:0006955; GO:0006954; GO:0090023; GO:0042127; GO:0032496; GO:0002237	Evidence at protein level	SUBCELLULAR LOCATION: Secreted.			SIGNAL 1 34
O43927	CXCL13	GO:0035754; GO:0035769; GO:0031735; GO:0048248; GO:0031724; GO:0007186; GO:0090630; GO:0005623; GO:0007166; GO:0007267; GO:0008009; GO:0070098; GO:0002544; GO:0042742; GO:0035768; GO:0005576; GO:0005615; GO:0017134; GO:0002467; GO:0008201; GO:0006955; GO:0006954; GO:0048535; GO:0002518; GO:2000545; GO:0010820; GO:0033634; GO:0007204; GO:0033625; GO:0046982; GO:0048018; GO:0045765; GO:0042127; GO:…	Evidence at protein level	SUBCELLULAR LOCATION: Secreted.			SIGNAL 1 22 {ECO:0000255}.
Q9NQ79	CRTAC1	GO:0007413; GO:0005509; GO:0070062; GO:0030426; GO:1900121; GO:0021772; GO:0005578	Evidence at protein level	SUBCELLULAR LOCATION: Secreted, extracellular space, extracellular matrix {ECO:0000269|PubMed:17074475}.			SIGNAL 1 27 {ECO:0000255}.
P06850	CRH	GO:0030325; GO:0008306; GO:0071314; GO:0071549; GO:0005737; GO:0016101; GO:0005576; GO:0005615; GO:0007565; GO:0006704; GO:0005179; GO:0008628; GO:0021854; GO:0006954; GO:0050801; GO:0007611; GO:0035641; GO:0060291; GO:0030324; GO:0045776; GO:0060548; GO:0042322; GO:0032811; GO:0010629; GO:0070093; GO:0033685; GO:0010700; GO:0005184; GO:0007567; GO:0043204; GO:2000987; GO:0030819; GO:0090280; GO:…	Evidence at protein level	SUBCELLULAR LOCATION: Secreted {ECO:0000250|UniProtKB:P06296}.			SIGNAL 1 24 {ECO:0000305}.
P0DML3	CSH2	GO:0005783; GO:0005576; GO:0031988; GO:0046872	Evidence at protein level	SUBCELLULAR LOCATION: Secreted.			SIGNAL 1 26 {ECO:0000269|PubMed:4712450, ECO:0000269|PubMed:5286363}.
O60676	CST8	GO:0009986; GO:0004869; GO:0005737; GO:0005576	Evidence at protein level	SUBCELLULAR LOCATION: Secreted.			SIGNAL 1 21 {ECO:0000255}.
Q9H4G1	CST9L	GO:0004869; GO:0005576	Evidence at protein level	SUBCELLULAR LOCATION: Secreted {ECO:0000305}.			SIGNAL 1 28 {ECO:0000269|PubMed:15340161}.
P02775	PPBP	GO:0045236; GO:0007186; GO:0008009; GO:0070098; GO:0042742; GO:0005576; GO:0005615; GO:0005355; GO:0015758; GO:0006955; GO:0006954; GO:0002523; GO:0030593; GO:0043312; GO:0031093; GO:0002576; GO:0051781; GO:0002690; GO:0042127; GO:0032496	Evidence at protein level	SUBCELLULAR LOCATION: Secreted.			SIGNAL 1 34 {ECO:0000269|PubMed:15340161, ECO:0000269|PubMed:2423119}.
P19876	CXCL3	GO:0045236; GO:0007186; GO:0008009; GO:0070098; GO:0005576; GO:0005615; GO:0006955; GO:0006954; GO:0030593; GO:0090023; GO:0042127; GO:0032496	Evidence at protein level	SUBCELLULAR LOCATION: Secreted.			SIGNAL 1 34 {ECO:0000269|PubMed:15340161}.
P80162	CXCL6	GO:0045236; GO:0007186; GO:0007267; GO:0008009; GO:0070098; GO:0006935; GO:0042742; GO:0005576; GO:0005615; GO:0008201; GO:0006955; GO:0006954; GO:0002446; GO:0002690; GO:0042127; GO:0032496; GO:0007165	Evidence at protein level	SUBCELLULAR LOCATION: Secreted.			SIGNAL 1 37 {ECO:0000269|PubMed:8399143, ECO:0000269|PubMed:8423327}.
P02778	CXCL10	GO:0048248; GO:0007186; GO:0010818; GO:0008015; GO:0008603; GO:0007166; GO:0007267; GO:0034605; GO:0071222; GO:0008009; GO:0070098; GO:0006935; GO:0051607; GO:0042118; GO:0009897; GO:0005576; GO:0005615; GO:0008201; GO:0006955; GO:0006954; GO:0007517; GO:0016525; GO:0045662; GO:1901740; GO:2000406; GO:0030816; GO:0043950; GO:0008284; GO:0090026; GO:0051281; GO:0045944; GO:0005102; GO:0010819; GO:…	Evidence at protein level	SUBCELLULAR LOCATION: Secreted.			SIGNAL 1 21 {ECO:0000269|PubMed:10233762, ECO:0000269|PubMed:11559369, ECO:0000269|PubMed:8423327}.
P01037	CST1	GO:0004869; GO:0001580; GO:0005615	Evidence at protein level	SUBCELLULAR LOCATION: Secreted {ECO:0000269|PubMed:20189825}.			SIGNAL 1 20 {ECO:0000269|PubMed:11788998, ECO:0000269|PubMed:15340161, ECO:0000269|PubMed:1778989}.
P01036	CST4	GO:0004869; GO:0001580; GO:0070062; GO:0005615; GO:0045861; GO:0001895	Evidence at protein level	SUBCELLULAR LOCATION: Secreted {ECO:0000269|PubMed:20189825}.			SIGNAL 1 20 {ECO:0000269|PubMed:1741693, ECO:0000269|PubMed:1747107, ECO:0000269|PubMed:1778989, ECO:0000269|PubMed:3496880}.
Q96CG8	CTHRC1	GO:0060071; GO:0016477; GO:0090103; GO:0005581; GO:0005737; GO:0090177; GO:0005615; GO:0060122; GO:0090090; GO:0043932; GO:0045669; GO:0033690; GO:0032092; GO:0005578	Evidence at protein level	SUBCELLULAR LOCATION: Secreted, extracellular space, extracellular matrix {ECO:0000250}.			SIGNAL 1 30
P42830	CXCL5	GO:0045236; GO:0007186; GO:0007267; GO:0008009; GO:0070098; GO:0006935; GO:0005576; GO:0005615; GO:0006955; GO:0006954; GO:0002446; GO:0008284; GO:0002690; GO:0032496; GO:0007165	Evidence at protein level	SUBCELLULAR LOCATION: Secreted.			SIGNAL 1 36 {ECO:0000269|PubMed:10095777, ECO:0000269|PubMed:12665801}.
Q07325	CXCL9	GO:0048248; GO:0007186; GO:0007267; GO:0006968; GO:0008009; GO:0070098; GO:0006935; GO:0005125; GO:0006952; GO:0051607; GO:0009897; GO:0005576; GO:0005615; GO:0006955; GO:0006954; GO:0030816; GO:0043950; GO:0002690; GO:0045663; GO:1901741; GO:0051281; GO:0042127; GO:0032496; GO:0007165	Evidence at protein level	SUBCELLULAR LOCATION: Secreted.			SIGNAL 1 22 {ECO:0000269|PubMed:10233762}.
P81534	DEFB103A	GO:0005796; GO:0042742; GO:0005576; GO:0005615; GO:0045087; GO:0006965	Evidence at protein level	SUBCELLULAR LOCATION: Secreted.			SIGNAL 1 22 {ECO:0000269|PubMed:11085990}.
O14625	CXCL11	GO:0048248; GO:0007186; GO:0010818; GO:0007267; GO:0008009; GO:0070098; GO:0006935; GO:0005576; GO:0005615; GO:0008201; GO:0006955; GO:0006954; GO:0030816; GO:0043950; GO:0002690; GO:0051281; GO:0042127; GO:0032496; GO:0007165	Evidence at protein level	SUBCELLULAR LOCATION: Secreted.			SIGNAL 1 21 {ECO:0000269|PubMed:10233762}.
O76096	CST7	GO:0004869; GO:0005737; GO:0004866; GO:0005576; GO:0006955	Evidence at protein level	SUBCELLULAR LOCATION: Secreted {ECO:0000269|PubMed:12423348}. Cytoplasm {ECO:0000269|PubMed:12423348}.			SIGNAL 1 19 {ECO:0000244|PubMed:25944712, ECO:0000255}.
P01034	CST3	GO:0001540; GO:0044267; GO:0004869; GO:0006952; GO:0004866; GO:0070062; GO:0043206; GO:0031012; GO:0005576; GO:0005615; GO:0042802; GO:0060313; GO:0010711; GO:0060311; GO:0010716; GO:0010466; GO:0045861; GO:0002020; GO:0034103	Evidence at protein level	SUBCELLULAR LOCATION: Secreted {ECO:0000269|PubMed:20189825}.			SIGNAL 1 26 {ECO:0000269|PubMed:15340161, ECO:0000269|PubMed:6283552, ECO:0000269|PubMed:6365094, ECO:0000269|PubMed:6662498}.
Q8N104	DEFB106A	GO:0009986; GO:0042742; GO:0005576; GO:0045087	Evidence at protein level	SUBCELLULAR LOCATION: Secreted.			SIGNAL 1 20 {ECO:0000255}.
P28325	CST5	GO:0004869; GO:0070062; GO:0005576	Evidence at protein level	SUBCELLULAR LOCATION: Secreted {ECO:0000269|PubMed:20189825}.			SIGNAL 1 20 {ECO:0000269|PubMed:8083219}.
P09228	CST2	GO:0004869; GO:0001580; GO:0005615	Evidence at protein level	SUBCELLULAR LOCATION: Secreted {ECO:0000269|PubMed:20189825}.			SIGNAL 1 20 {ECO:0000269|PubMed:15340161, ECO:0000269|PubMed:1778989}.
P81605	DCD	GO:0042742; GO:0050832; GO:0070062; GO:0005576; GO:0005615; GO:0031640; GO:0008233; GO:0044822	Evidence at protein level	SUBCELLULAR LOCATION: Secreted.			SIGNAL 1 19 {ECO:0000269|PubMed:15340161, ECO:0000269|PubMed:25946035, ECO:0000269|PubMed:9736629}.
Q30KQ6	DEFB114	GO:0042742; GO:0005576; GO:0045087; GO:0001530; GO:0031665	Evidence at protein level	SUBCELLULAR LOCATION: Secreted {ECO:0000250}.			SIGNAL 1 26 {ECO:0000255}.
Q9BYW3	DEFB126	GO:0009986; GO:0042742; GO:0005576; GO:0030112; GO:0045087; GO:0007338	Evidence at protein level	SUBCELLULAR LOCATION: Secreted {ECO:0000305}. Note=Secreted by epididymal cells and is absorbed to the surface of sperm during transit through the epididymis (By similarity). Mainly located on the sperm acrosome. {ECO:0000250|UniProtKB:Q9BEE3, ECO:0000269|PubMed:26832966}.			SIGNAL 1 20 {ECO:0000255}.
Q9H1M4	DEFB127	GO:0009986; GO:0042742; GO:0005576; GO:0045087	Evidence at protein level	SUBCELLULAR LOCATION: Secreted {ECO:0000305}.			SIGNAL 1 20 {ECO:0000269|PubMed:15340161}.
Q01523	DEFA5	GO:0005796; GO:0019731; GO:0050832; GO:0005576; GO:0005615; GO:0045087; GO:0031640; GO:0034774; GO:0030133	Evidence at protein level	SUBCELLULAR LOCATION: Secreted {ECO:0000269|PubMed:12021776}. Cytoplasmic vesicle, secretory vesicle {ECO:0000269|PubMed:12021776}. Note=Peptides HD5(20-94), HD5(23-94) and HD5(29-94) are found within tissues, HD5(20-94) being the predominant intracellular form. Peptides HD5(56-94) and HD5(63-94) are found in the extracellular milieu, HD5(63-94) being the most abundant form.			SIGNAL 1 19
O00622	CCN1	GO:0009653; GO:0003278; GO:0060413; GO:0003181; GO:0007155; GO:0008283; GO:0007267; GO:0006935; GO:0060591; GO:0060710; GO:0031012; GO:0050840; GO:0030198; GO:0008201; GO:0005178; GO:0002041; GO:0060716; GO:0043066; GO:0060548; GO:0001649; GO:0030513; GO:0061036; GO:0030335; GO:0010811; GO:2000304; GO:0043280; GO:0045669; GO:0033690; GO:0010518; GO:0045860; GO:0001934; GO:0045944; GO:0005578; GO:…	Evidence at protein level	SUBCELLULAR LOCATION: Secreted.			SIGNAL 1 24 {ECO:0000255}.
Q01524	DEFA6	GO:0005796; GO:0019731; GO:0050832; GO:0005576; GO:0005615; GO:0045087; GO:0031640	Evidence at protein level	SUBCELLULAR LOCATION: Secreted.			SIGNAL 1 19 {ECO:0000255}.
O15263	DEFB4A	GO:0007186; GO:0005796; GO:0006935; GO:0042742; GO:0005576; GO:0005615; GO:0006955; GO:0045087	Evidence at protein level	SUBCELLULAR LOCATION: Secreted.			SIGNAL 1 23 {ECO:0000255}.
Q9NRR1	CYTL1	GO:1990079; GO:0002062; GO:0050650; GO:0005615; GO:0048839; GO:0051091; GO:0045944; GO:0005102; GO:0007165	Evidence at protein level	SUBCELLULAR LOCATION: Secreted {ECO:0000269|PubMed:10857752}.			SIGNAL 1 22 {ECO:0000269|PubMed:15340161}.
P60022	DEFB1	GO:0007186; GO:0005796; GO:0002526; GO:0019731; GO:0006935; GO:0050830; GO:0042742; GO:0070062; GO:0005576; GO:0005615; GO:0006955; GO:0045087; GO:0002227; GO:0009617; GO:0033574	Evidence at protein level	SUBCELLULAR LOCATION: Secreted {ECO:0000269|PubMed:7628632}.			SIGNAL 1 21 {ECO:0000244|PubMed:25944712, ECO:0000255}.
Q5J5C9	DEFB121	GO:0009986; GO:0042742; GO:0005576; GO:0045087	Evidence at protein level	SUBCELLULAR LOCATION: Secreted {ECO:0000305}.			SIGNAL 1 15 {ECO:0000255}.
Q8NBQ5	HSD17B11	GO:0006710; GO:0005737; GO:0005829; GO:0004303; GO:0006703; GO:0005576; GO:0043231; GO:0005811; GO:0016229	Evidence at protein level	SUBCELLULAR LOCATION: Secreted {ECO:0000305}.			SIGNAL 1 19 {ECO:0000255}.
Q9UBT3	DKK4	GO:0016055; GO:0005576; GO:0007275; GO:0030178; GO:0090090; GO:0061170	Evidence at protein level	SUBCELLULAR LOCATION: Secreted.			SIGNAL 1 18 {ECO:0000269|PubMed:10570958, ECO:0000269|PubMed:15340161}.
Q07507	DPT	GO:0007155; GO:0030199; GO:0070062; GO:0005615; GO:0008285; GO:0005578	Evidence at protein level	SUBCELLULAR LOCATION: Secreted, extracellular space, extracellular matrix {ECO:0000250}.			SIGNAL 1 18 {ECO:0000250}.
Q6UWP2	DHRS11	GO:0005576; GO:0016491	Evidence at protein level	SUBCELLULAR LOCATION: Secreted {ECO:0000305}.			SIGNAL 1 30 {ECO:0000255}.
Q8NDZ4	DIPK2A	GO:0030126; GO:0000139; GO:0060038; GO:0005615; GO:0014066	Evidence at protein level	SUBCELLULAR LOCATION: Cytoplasmic vesicle, COPI-coated vesicle. Golgi apparatus. Secreted.			SIGNAL 1 35 {ECO:0000255}.
P59665	DEFA1	GO:0005796; GO:0019731; GO:0035578; GO:0006935; GO:0050830; GO:0050832; GO:0051607; GO:0070062; GO:0005576; GO:0005615; GO:0006955; GO:0045087; GO:0002227; GO:0030520; GO:0031640	Evidence at protein level	SUBCELLULAR LOCATION: Secreted.			SIGNAL 1 19 {ECO:0000269|PubMed:15340161}.
P12838	DEFA4	GO:0005796; GO:0019731; GO:0019730; GO:0042582; GO:0050829; GO:0050830; GO:0050832; GO:0005576; GO:0005615; GO:0045087; GO:0031640	Evidence at protein level	SUBCELLULAR LOCATION: Secreted.			SIGNAL 1 19 {ECO:0000255}.
P24855	DNASE1	GO:0006308; GO:0006915; GO:0004530; GO:0070062; GO:0005576; GO:0005635; GO:0005634	Evidence at protein level	SUBCELLULAR LOCATION: Secreted. Nucleus envelope. Note=Secretory protein, stored in zymogen granules and found in the nuclear envelope.			SIGNAL 1 22 {ECO:0000269|PubMed:2277032, ECO:0000269|PubMed:3263467}.
P59666	DEFA3	GO:0005796; GO:0019731; GO:0035578; GO:0050830; GO:0050832; GO:0051607; GO:0070062; GO:0005576; GO:0005615; GO:0045087; GO:0002227; GO:0030520; GO:0031640	Evidence at protein level	SUBCELLULAR LOCATION: Secreted.			SIGNAL 1 19
O94907	DKK1	GO:0090244; GO:0000904; GO:0039706; GO:0031901; GO:0030326; GO:0001706; GO:0005576; GO:0005615; GO:0060325; GO:0030900; GO:0008083; GO:0001942; GO:0050750; GO:0001707; GO:1904693; GO:0061743; GO:0030514; GO:0030178; GO:1904723; GO:0090090; GO:1901296; GO:2000726; GO:0042662; GO:0060394; GO:0033137; GO:0032091; GO:0048642; GO:0051964; GO:0000122; GO:0005886; GO:0090082; GO:0048019; GO:1904338; GO:…	Evidence at protein level	SUBCELLULAR LOCATION: Secreted.			SIGNAL 1 31 {ECO:0000269|PubMed:15340161}.
Q7Z5P4	HSD17B13	GO:0005576; GO:0005811; GO:0016491; GO:0046889	Evidence at protein level	SUBCELLULAR LOCATION: Secreted {ECO:0000305}.			SIGNAL 1 19 {ECO:0000255}.
O43323	DHH	GO:0033327; GO:0005509; GO:0007267; GO:0005615; GO:0030238; GO:0042552; GO:0008233; GO:0005886; GO:0050810; GO:0032355; GO:0007286; GO:0008270	Evidence at protein level	SUBCELLULAR LOCATION: Desert hedgehog protein N-product: Cell membrane {ECO:0000250}; Lipid-anchor {ECO:0000250}; Extracellular side {ECO:0000250}. Note=The N-terminal peptide remains associated with the cell surface. {ECO:0000250}.; SUBCELLULAR LOCATION: Desert hedgehog protein C-product: Secreted, extracellular space {ECO:0000250}. Note=The C-terminal peptide diffuses from the cell. {ECO:000025…			SIGNAL 1 22 {ECO:0000255}.
Q9UBP4	DKK3	GO:0016055; GO:0030325; GO:0009653; GO:0005615; GO:0032348; GO:1902613; GO:0090090; GO:2000065; GO:0045892; GO:0017015	Evidence at protein level	SUBCELLULAR LOCATION: Secreted.			SIGNAL 1 21 {ECO:0000269|PubMed:15340161, ECO:0000269|PubMed:19838169}.
Q8NBI3	DRAXIN	GO:0016055; GO:0007411; GO:0021528; GO:0021516; GO:0005576; GO:0030900; GO:0030517; GO:0090090; GO:0043524	Evidence at protein level	SUBCELLULAR LOCATION: Secreted {ECO:0000305}.			SIGNAL 1 25 {ECO:0000255|HAMAP-Rule:MF_03060, ECO:0000269|PubMed:15340161}.
Q9NZW4	DSPP	GO:0031214; GO:0005509; GO:0005518; GO:0005737; GO:0030198; GO:0005201; GO:0005576; GO:0007275; GO:0001503; GO:0005578; GO:0001501	Evidence at protein level	SUBCELLULAR LOCATION: Secreted, extracellular space, extracellular matrix.			SIGNAL 1 15 {ECO:0000255}.
Q9UGM3	DMBT1	GO:0048306; GO:0044267; GO:0005737; GO:0051607; GO:0030855; GO:0070062; GO:0005576; GO:0005615; GO:0019898; GO:0043152; GO:0045087; GO:0007275; GO:0030670; GO:0015031; GO:0005044; GO:0008329; GO:0016032; GO:0035375; GO:0042589	Evidence at protein level	SUBCELLULAR LOCATION: Secreted {ECO:0000250}. Note=Some isoforms may be membrane-bound. Localized to the lumenal aspect of crypt cells in the small intestine. In the colon, seen in the lumenal aspect of surface epithelial cells. Formed in the ducts of von Ebner gland, and released into the fluid bathing the taste buds contained in the taste papillae (By similarity). {ECO:0000250}.			SIGNAL 1 19 {ECO:0000255}.
Q13316	DMP1	GO:0031214; GO:0005509; GO:0005737; GO:0050840; GO:0030198; GO:0005576; GO:0005178; GO:0043231; GO:0005730; GO:0005634; GO:0001503; GO:0010811; GO:0005578	Evidence at protein level	SUBCELLULAR LOCATION: Nucleus {ECO:0000269|PubMed:12615915}. Cytoplasm {ECO:0000269|PubMed:12615915}. Secreted, extracellular space, extracellular matrix {ECO:0000269|PubMed:12615915}. Note=In proliferating preosteoblasts it is nuclear, during early maturation stage is cytoplasmic and in mature osteoblast localizes in the mineralized matrix. Export from the nucleus of differentiating osteoblast i…			SIGNAL 1 16 {ECO:0000255}.
Q92874	DNASE1L2	GO:0003677; GO:0006308; GO:0006259; GO:0005509; GO:0003335; GO:0005737; GO:0004536; GO:0004519; GO:0005576; GO:0001942; GO:0005634	Evidence at protein level	SUBCELLULAR LOCATION: Cytoplasm {ECO:0000269|PubMed:16902420}. Secreted {ECO:0000305}.			SIGNAL 1 20 {ECO:0000255}.
P12724	RNASE3	GO:0006401; GO:0019731; GO:0050830; GO:0004519; GO:0070062; GO:0005576; GO:0005615; GO:0002227; GO:0003676; GO:0004540	Evidence at protein level	SUBCELLULAR LOCATION: Secreted. Note=Located in the matrix of eosinophil large specific granule, which are released following activation by an immune stimulus.			SIGNAL 1 27 {ECO:0000269|PubMed:2501794, ECO:0000269|PubMed:3458170}.
P05305	EDN1	GO:0007186; GO:0033093; GO:0014824; GO:0045178; GO:0007589; GO:0019722; GO:0051216; GO:0016049; GO:0007166; GO:0007267; GO:0071277; GO:0035690; GO:0071398; GO:0071385; GO:0071456; GO:0071346; GO:0071347; GO:0071389; GO:0071375; GO:0071560; GO:0071356; GO:0005125; GO:0005737; GO:0009953; GO:0031707; GO:0031708; GO:0042045; GO:0005576; GO:0005615; GO:0015758; GO:0007507; GO:0001821; GO:0005179; GO:…	Evidence at protein level	SUBCELLULAR LOCATION: Secreted.			SIGNAL 1 17 {ECO:0000269|PubMed:1864385}.
P20800	EDN2	GO:0014824; GO:0019722; GO:0007166; GO:0019221; GO:0031708; GO:0097009; GO:0005576; GO:0005615; GO:0003058; GO:0005179; GO:0048016; GO:0005622; GO:0048286; GO:0042116; GO:0048246; GO:0030593; GO:0008284; GO:0007204; GO:0010460; GO:0002690; GO:0060585; GO:0045987; GO:0003099; GO:0001516; GO:0003100; GO:0019229; GO:0001659; GO:0042310; GO:0014826	Evidence at protein level	SUBCELLULAR LOCATION: Secreted.			SIGNAL 1 24 {ECO:0000255}.
Q16610	ECM1	GO:0001525; GO:0031214; GO:0019899; GO:0070062; GO:0031012; GO:0005576; GO:0005615; GO:0006954; GO:0043236; GO:0030502; GO:0001960; GO:0010466; GO:0001503; GO:0002576; GO:0031089; GO:0043123; GO:0045766; GO:0001938; GO:0002020; GO:0008022; GO:0005578; GO:2000404; GO:0006357; GO:0002828; GO:0004871	Evidence at protein level	SUBCELLULAR LOCATION: Secreted, extracellular space, extracellular matrix.			SIGNAL 1 19 {ECO:0000250|UniProtKB:Q62894}.
Q9NRM1	ENAM	GO:0097186; GO:0031214; GO:0005578	Evidence at protein level	SUBCELLULAR LOCATION: Secreted, extracellular space, extracellular matrix {ECO:0000250|UniProtKB:O97939}.			SIGNAL 1 39 {ECO:0000255}.
P14138	EDN3	GO:0008015; GO:0007166; GO:0007267; GO:0006874; GO:0010961; GO:0031708; GO:0005576; GO:0005615; GO:0005179; GO:0048016; GO:0005622; GO:0030318; GO:0007275; GO:0001755; GO:0030182; GO:0030593; GO:0030072; GO:0043406; GO:0045597; GO:0008284; GO:0010460; GO:0046887; GO:0002690; GO:0045840; GO:1901381; GO:0005102; GO:0048070; GO:0010468; GO:0003100; GO:0019229; GO:0007165; GO:0042310; GO:0014826	Evidence at protein level	SUBCELLULAR LOCATION: Secreted.			SIGNAL 1 16 {ECO:0000255}.
P19957	PI3	GO:0007620; GO:0004866; GO:0070062; GO:0005578; GO:0004867	Evidence at protein level	SUBCELLULAR LOCATION: Secreted.			SIGNAL 1 22 {ECO:0000269|PubMed:7685029}.
P15502	ELN	GO:0008015; GO:0008283; GO:0071953; GO:0022617; GO:0030198; GO:0005201; GO:0005576; GO:0009887; GO:0005578; GO:0007585	Evidence at protein level	SUBCELLULAR LOCATION: Secreted, extracellular space, extracellular matrix {ECO:0000269|PubMed:17035250}. Note=Extracellular matrix of elastic fibers. {ECO:0000269|PubMed:17035250}.			SIGNAL 1 26 {ECO:0000250|UniProtKB:Q99372}.
Q9UHF1	EGFL7	GO:0001525; GO:0001568; GO:0005509; GO:0007155; GO:0031012; GO:0005576; GO:0005615; GO:0045746; GO:0001938; GO:0001570	Evidence at protein level	SUBCELLULAR LOCATION: Secreted, extracellular space {ECO:0000269|PubMed:23386126}.			SIGNAL 1 23 {ECO:0000255}.
O95925	EPPIN	GO:0009986; GO:0042742; GO:0005615; GO:0090281; GO:0010466; GO:1901318; GO:0043234; GO:0051259; GO:0004867	Evidence at protein level	SUBCELLULAR LOCATION: Isoform 1: Secreted. Cell surface. Note=Bound to the surface of testicular and on the head and tail of ejaculate spermatozoa.			SIGNAL 1 21 {ECO:0000255}.
Q99944	EGFL8	GO:0005509; GO:0005576	Evidence at protein level	SUBCELLULAR LOCATION: Secreted {ECO:0000305}.			SIGNAL 1 25 {ECO:0000269|PubMed:15340161}.
Q9Y6C2	EMILIN1	GO:0007155; GO:0005581; GO:0070062; GO:0031012; GO:0005576; GO:0005578	Evidence at protein level	SUBCELLULAR LOCATION: Secreted, extracellular space, extracellular matrix. Note=Found mainly at the interface between amorphous elastin and microfibrils.			SIGNAL 1 21 {ECO:0000255}.
Q13822	ENPP2	GO:0007186; GO:0047391; GO:0005509; GO:0006935; GO:0005615; GO:0016787; GO:0006955; GO:0005887; GO:0004622; GO:0006928; GO:0003676; GO:0004551; GO:0006796; GO:0034638; GO:0004528; GO:0009395; GO:0005886; GO:0030247; GO:0010634; GO:2000394; GO:0050731; GO:0045765; GO:0030334; GO:0005044; GO:0008134; GO:0008270	Evidence at protein level	SUBCELLULAR LOCATION: Secreted {ECO:0000269|PubMed:15769751}. Note=Secreted by most body fluids including serum and CSF. Also by adipocytes and numerous cancer cells.			SIGNAL 1 27 {ECO:0000250}.
Q8N2X6	EXOC3-AS1	GO:0005576	Evidence at protein level	SUBCELLULAR LOCATION: Secreted {ECO:0000305}.			SIGNAL 1 18 {ECO:0000255}.
P21128	ENDOU	GO:0003723; GO:0005737; GO:0004521; GO:0005576; GO:0005615; GO:0007565; GO:0008083; GO:0006955; GO:0030145; GO:0005886; GO:0030247; GO:0006508; GO:0005044; GO:0008236	Evidence at protein level	SUBCELLULAR LOCATION: Secreted {ECO:0000305}.			SIGNAL 1 18 {ECO:0000269|PubMed:2350438}.
P01588	EPO	GO:0006953; GO:0007568; GO:0006915; GO:0008015; GO:0009986; GO:0071474; GO:0007566; GO:0030218; GO:0043249; GO:0005576; GO:0005615; GO:0042541; GO:0010523; GO:2001258; GO:1902251; GO:1902219; GO:1901215; GO:0000122; GO:0018105; GO:0045740; GO:0070374; GO:0046579; GO:0042104; GO:0008284; GO:0010976; GO:0045893; GO:0042523; GO:0030295; GO:0061418; GO:0048678; GO:0051602; GO:0043627; GO:0055093; GO:…	Evidence at protein level	SUBCELLULAR LOCATION: Secreted.			SIGNAL 1 27 {ECO:0000269|PubMed:3949763}.
Q9NQ30	ESM1	GO:0001525; GO:0005576; GO:0005171; GO:0005178; GO:0008284; GO:1902204; GO:0001558; GO:0002040	Evidence at protein level	SUBCELLULAR LOCATION: Secreted.			SIGNAL 1 19 {ECO:0000255}.
Q9BXX0	EMILIN2	GO:0007155; GO:0005581; GO:0031012; GO:0030023; GO:0005576; GO:0005578	Evidence at protein level	SUBCELLULAR LOCATION: Secreted, extracellular space, extracellular matrix. Note=Found mainly at the interface between amorphous elastin and microfibrils.			SIGNAL 1 30 {ECO:0000255}.
P00742	F10	GO:0006888; GO:0005796; GO:0007596; GO:0007598; GO:0007597; GO:0005509; GO:0005788; GO:0005576; GO:0031233; GO:0017187; GO:0005543; GO:0005886; GO:0030335; GO:0051897; GO:0004252; GO:0006465	Evidence at protein level	SUBCELLULAR LOCATION: Secreted.			SIGNAL 1 31 {ECO:0000255}.
P03951	F11	GO:0007596; GO:0007597; GO:0070062; GO:0005576; GO:0005615; GO:0008201; GO:0016020; GO:0005886; GO:0031639; GO:0051919; GO:0070009; GO:0004252	Evidence at protein level	SUBCELLULAR LOCATION: Secreted.			SIGNAL 1 18
P00740	F9	GO:0006888; GO:0005796; GO:0007596; GO:0007598; GO:0007597; GO:0005509; GO:0004175; GO:0005788; GO:0070062; GO:0005576; GO:0005615; GO:0017187; GO:0005886; GO:0006508; GO:0004252; GO:0006465; GO:0031638	Evidence at protein level	SUBCELLULAR LOCATION: Secreted {ECO:0000269|PubMed:19846852, ECO:0000269|PubMed:2592373, ECO:0000269|PubMed:3857619, ECO:0000269|PubMed:8295821, ECO:0000269|PubMed:9169594}.			SIGNAL 1 28 {ECO:0000255}.
P56851	EDDM3B	GO:0005576	Evidence at protein level	SUBCELLULAR LOCATION: Secreted {ECO:0000305}.			SIGNAL 1 25 {ECO:0000255}.
P00748	F12	GO:0002542; GO:0007597; GO:0005509; GO:0070062; GO:0005576; GO:0005615; GO:0042730; GO:0045087; GO:0051787; GO:0002353; GO:0005886; GO:0030194; GO:0051919; GO:0010756; GO:0016540; GO:0016485; GO:0051788; GO:0004252; GO:0031638	Evidence at protein level	SUBCELLULAR LOCATION: Secreted.			SIGNAL 1 19 {ECO:0000269|PubMed:3886654}.
P00451	F8	GO:0048208; GO:0030134; GO:0006888; GO:0000139; GO:0006953; GO:0007596; GO:0007597; GO:0005507; GO:0005788; GO:0033116; GO:0005576; GO:0005615; GO:0016491; GO:0005886; GO:0030168; GO:0031093; GO:0002576	Evidence at protein level	SUBCELLULAR LOCATION: Secreted, extracellular space.			SIGNAL 1 19
Q9UFP1	GASK1A	GO:0005576	Evidence at protein level	SUBCELLULAR LOCATION: Secreted {ECO:0000305}.			SIGNAL 1 29 {ECO:0000255}.
P23142	FBLN1	GO:0005604; GO:0072378; GO:0005509; GO:0071953; GO:0007566; GO:0070062; GO:0030198; GO:0005201; GO:0005576; GO:0005615; GO:0070051; GO:0001968; GO:0042802; GO:0005178; GO:0070373; GO:0007162; GO:2000146; GO:0001933; GO:2000647; GO:1900025; GO:1904188; GO:2001202; GO:0016504; GO:0048146; GO:0010628; GO:1904237; GO:0008022; GO:0032403; GO:0005578; GO:0016032	Evidence at protein level	SUBCELLULAR LOCATION: Secreted, extracellular space, extracellular matrix.			SIGNAL 1 29 {ECO:0000269|PubMed:2527614}.
Q9UBX5	FBLN5	GO:0005509; GO:0007160; GO:0071953; GO:0048251; GO:0070062; GO:0031012; GO:0030198; GO:0005576; GO:0005615; GO:0005178; GO:0008022; GO:0042803; GO:0034394; GO:0005578; GO:0001558; GO:2000121; GO:0046903	Evidence at protein level	SUBCELLULAR LOCATION: Secreted {ECO:0000269|PubMed:16652333, ECO:0000269|PubMed:17035250, ECO:0000269|PubMed:20599547}. Secreted, extracellular space, extracellular matrix {ECO:0000269|PubMed:17035250}. Note=co-localizes with ELN in elastic fibers. {ECO:0000269|PubMed:17035250}.			SIGNAL 1 23 {ECO:0000255}.
O75636	FCN3	GO:0003823; GO:0072562; GO:0030246; GO:0005581; GO:0006956; GO:0001867; GO:0051607; GO:0005576; GO:0046872; GO:1902679; GO:0046597; GO:0043654; GO:0004252	Evidence at protein level	SUBCELLULAR LOCATION: Secreted. Note=Found in blood plasma, bronchus, alveolus and bile duct.			SIGNAL 1 23 {ECO:0000269|PubMed:15340161}.
Q8NFU4	FDCSP	GO:0005576	Evidence at protein level	SUBCELLULAR LOCATION: Secreted.			SIGNAL 1 17 {ECO:0000255}.
Q96BH3	ELSPBP1	GO:0005576; GO:0007338	Evidence at protein level	SUBCELLULAR LOCATION: Secreted {ECO:0000269|PubMed:11144225, ECO:0000269|PubMed:17307309}.			SIGNAL 1 24 {ECO:0000255}.
P05160	F13B	GO:0007596; GO:0005576	Evidence at protein level	SUBCELLULAR LOCATION: Secreted {ECO:0000269|PubMed:26247044, ECO:0000269|PubMed:4405643}.			SIGNAL 1 20 {ECO:0000269|PubMed:3021194}.
P58499	FAM3B	GO:0006915; GO:0005125; GO:0070062; GO:0005576; GO:0005615; GO:0030073	Evidence at protein level	SUBCELLULAR LOCATION: Secreted. Note=Present in insulin secretory granules and likely cosecreted with insulin. Localized in discrete vesicular and perinuclear structure.			SIGNAL 1 29
Q96BQ1	FAM3D	GO:0005125; GO:0005576; GO:0046676	Evidence at protein level	SUBCELLULAR LOCATION: Secreted {ECO:0000305}.			SIGNAL 1 25 {ECO:0000255}.
P02771	AFP	GO:0060395; GO:0005737; GO:0005615; GO:0001889; GO:0046872; GO:0031100; GO:0001542; GO:0031016; GO:0042448; GO:0010033; GO:0006810	Evidence at protein level	SUBCELLULAR LOCATION: Secreted.			SIGNAL 1 18 {ECO:0000269|PubMed:1709810}.
Q9UGM5	FETUB	GO:0007339; GO:0004869; GO:0070062; GO:0005576; GO:0005615; GO:0008191; GO:0010951; GO:0007338	Evidence at protein level	SUBCELLULAR LOCATION: Secreted {ECO:0000250}.			SIGNAL 1 15 {ECO:0000255}.
O60258	FGF17	GO:0016303; GO:0000165; GO:0005088; GO:0007267; GO:0005576; GO:0005615; GO:0008543; GO:0008083; GO:0005622; GO:0007399; GO:0046934; GO:0048015; GO:0008284; GO:0004713; GO:0014066; GO:0007165; GO:0005105; GO:0005111	Evidence at protein level	SUBCELLULAR LOCATION: Secreted.			SIGNAL 1 22 {ECO:0000255}.
O95750	FGF19	GO:0016303; GO:0000165; GO:0005088; GO:0005576; GO:0005104; GO:0008543; GO:0007507; GO:0005622; GO:0070858; GO:0010629; GO:0007399; GO:0001755; GO:0046934; GO:0048015; GO:0070374; GO:0046330; GO:0008284; GO:0046326; GO:0001934; GO:0014066	Evidence at protein level	SUBCELLULAR LOCATION: Secreted.			SIGNAL 1 24 {ECO:0000269|PubMed:15340161}.
P08709	F7	GO:0006888; GO:0005796; GO:0007596; GO:0007598; GO:0005509; GO:0007623; GO:0005788; GO:0005576; GO:0005615; GO:0001948; GO:0031100; GO:0017187; GO:0005886; GO:0030194; GO:0030335; GO:0002690; GO:0010641; GO:0050927; GO:0051897; GO:0043627; GO:0060416; GO:0032571; GO:0004252; GO:0008236; GO:0006465; GO:0031982	Evidence at protein level	SUBCELLULAR LOCATION: Secreted.			SIGNAL 1 20 {ECO:0000255}.
P98173	FAM3A	GO:0005576	Evidence at protein level	SUBCELLULAR LOCATION: Secreted {ECO:0000305}.			SIGNAL 1 33 {ECO:0000255}.
Q9HCT0	FGF22	GO:0016303; GO:0005794; GO:0000165; GO:0005088; GO:0030154; GO:0009986; GO:0005576; GO:0005615; GO:0008543; GO:0005730; GO:0046934; GO:0048015; GO:0004713; GO:0014066	Evidence at protein level	SUBCELLULAR LOCATION: Secreted {ECO:0000305}.			SIGNAL 1 22 {ECO:0000255}.
Q9BYJ0	FGFBP2	GO:0005615	Evidence at protein level	SUBCELLULAR LOCATION: Secreted, extracellular space {ECO:0000269|PubMed:11342666}.			SIGNAL 1 19 {ECO:0000255}.
P36980	CFHR2	GO:0005576	Evidence at protein level	SUBCELLULAR LOCATION: Secreted.			SIGNAL 1 18 {ECO:0000269|PubMed:1533657}.
Q7Z5A9	TAFA1	GO:0005783; GO:0005576	Evidence at protein level	SUBCELLULAR LOCATION: Secreted {ECO:0000269|PubMed:15028294}.			SIGNAL 1 19 {ECO:0000255}.
Q96LR4	TAFA4	GO:0005576; GO:0042391; GO:0051930	Evidence at protein level	SUBCELLULAR LOCATION: Secreted {ECO:0000269|PubMed:15028294}.			SIGNAL 1 35 {ECO:0000255}.
Q8IXL6	FAM20C	GO:0005524; GO:0005794; GO:0031214; GO:0005509; GO:0097187; GO:0070166; GO:0070062; GO:0005615; GO:0030145; GO:0071895; GO:0036179; GO:0030501; GO:0045669; GO:0006468; GO:0004674; GO:0040036; GO:0051174	Evidence at protein level	SUBCELLULAR LOCATION: Secreted {ECO:0000269|PubMed:26091039}. Golgi apparatus {ECO:0000250|UniProtKB:Q5MJS3}.			SIGNAL 1 22 {ECO:0000255}.
P12259	F5	GO:0048208; GO:0030134; GO:0006888; GO:0000139; GO:0008015; GO:0007596; GO:0005507; GO:0005788; GO:0033116; GO:0005576; GO:0005615; GO:1903561; GO:0016020; GO:0005886; GO:0030168; GO:0031093; GO:0002576	Evidence at protein level	SUBCELLULAR LOCATION: Secreted {ECO:0000250}.			SIGNAL 1 28
Q12805	EFEMP1	GO:0005604; GO:0005509; GO:0043010; GO:0005737; GO:0048048; GO:0005154; GO:0007173; GO:0005006; GO:0070062; GO:0005576; GO:0005615; GO:0032331; GO:0010977; GO:0018108; GO:0031346; GO:0008284; GO:0048050; GO:0005578; GO:1903975; GO:0006355; GO:0007601	Evidence at protein level	SUBCELLULAR LOCATION: Secreted, extracellular space {ECO:0000250}. Secreted, extracellular space, extracellular matrix {ECO:0000250}. Note=Localizes to the lamina propria underneath the olfactory epithelium. {ECO:0000250}.			SIGNAL 1 17 {ECO:0000255}.
Q9NSA1	FGF21	GO:0005623; GO:0007267; GO:0035690; GO:0071333; GO:0071404; GO:0030968; GO:0072577; GO:0005576; GO:0005615; GO:2000352; GO:0070374; GO:0090080; GO:0008284; GO:0046326; GO:0045716; GO:0010988; GO:0014823; GO:0031667; GO:0007165	Evidence at protein level	SUBCELLULAR LOCATION: Secreted {ECO:0000305}.			SIGNAL 1 28 {ECO:0000269|PubMed:15340161}.
P11487	FGF3	GO:0016303; GO:0000165; GO:0005088; GO:0009653; GO:0030154; GO:0007267; GO:0005576; GO:0008543; GO:0008083; GO:0005622; GO:0007275; GO:0055026; GO:0046934; GO:0048015; GO:0051781; GO:0008284; GO:0004713; GO:0014066; GO:0007165	Evidence at protein level	SUBCELLULAR LOCATION: Secreted {ECO:0000305}.			SIGNAL 1 17 {ECO:0000255}.
P02675	FGB	GO:0002250; GO:0007596; GO:0072378; GO:0072562; GO:0005938; GO:0009986; GO:0007160; GO:0043623; GO:0071347; GO:0044320; GO:0051087; GO:0009897; GO:0070062; GO:0030198; GO:0005576; GO:0005615; GO:1903561; GO:0005577; GO:0042730; GO:0043152; GO:0045087; GO:2000352; GO:1902042; GO:0005886; GO:0031639; GO:0070527; GO:0031091; GO:0031093; GO:0002576; GO:0070374; GO:0045921; GO:0034116; GO:0090277; GO:…	Evidence at protein level	SUBCELLULAR LOCATION: Secreted {ECO:0000269|PubMed:10074346, ECO:0000269|PubMed:19296670, ECO:0000269|PubMed:9628725}.			SIGNAL 1 30 {ECO:0000269|PubMed:420779, ECO:0000269|PubMed:936108, ECO:0000269|Ref.11, ECO:0000269|Ref.13}.
P02679	FGG	GO:0007596; GO:0072378; GO:0072562; GO:0050839; GO:0005938; GO:0009986; GO:0007160; GO:0043623; GO:0009897; GO:0070062; GO:0030198; GO:0005576; GO:0005615; GO:0005577; GO:0042730; GO:0046872; GO:2000352; GO:1902042; GO:0005886; GO:0031639; GO:0070527; GO:0031091; GO:0031093; GO:0002576; GO:0070374; GO:0045921; GO:0034116; GO:0090277; GO:0050714; GO:1900026; GO:0045907; GO:0051258; GO:0009306; GO:…	Evidence at protein level	SUBCELLULAR LOCATION: Secreted {ECO:0000269|PubMed:10074346, ECO:0000269|PubMed:19296670, ECO:0000269|PubMed:9628725}.			SIGNAL 1 26 {ECO:0000269|PubMed:8509453, ECO:0000269|Ref.9}.
Q92520	FAM3C	GO:0005794; GO:0005125; GO:0070062; GO:0005576; GO:0007275; GO:0002576; GO:0031089	Evidence at protein level	SUBCELLULAR LOCATION: Secreted {ECO:0000250}. Cytoplasmic vesicle {ECO:0000269|PubMed:16959614}. Note=Cytoplasmic in some cancer cells.			SIGNAL 1 24 {ECO:0000255}.
Q9GZV9	FGF23	GO:0016303; GO:0005796; GO:0000165; GO:0005088; GO:0030154; GO:0030643; GO:0071354; GO:0044320; GO:0071374; GO:0071305; GO:0005576; GO:0005615; GO:0008543; GO:0030502; GO:0046888; GO:0045668; GO:0055062; GO:0046934; GO:0048015; GO:0070374; GO:0090080; GO:0045893; GO:0010980; GO:0004713; GO:0010966; GO:0014066; GO:0032026; GO:1904383; GO:0042369	Evidence at protein level	SUBCELLULAR LOCATION: Secreted {ECO:0000269|PubMed:16638743}. Note=Secretion is dependent on O-glycosylation.			SIGNAL 1 24 {ECO:0000269|PubMed:15340161}.
P02765	AHSG	GO:0006953; GO:0072562; GO:0004869; GO:0004866; GO:0070062; GO:0031012; GO:0005576; GO:0005615; GO:0019210; GO:0070168; GO:0030502; GO:0046627; GO:0001503; GO:0006907; GO:0031093; GO:0002576; GO:0050766; GO:0030500; GO:0050727; GO:0001501	Evidence at protein level	SUBCELLULAR LOCATION: Secreted.			SIGNAL 1 18 {ECO:0000269|PubMed:12665801, ECO:0000269|PubMed:3944104}.
P12034	FGF5	GO:0016303; GO:0000165; GO:0005088; GO:0008283; GO:0007267; GO:0005576; GO:0005615; GO:0005104; GO:0008543; GO:0010001; GO:0005622; GO:0007399; GO:0046934; GO:0048015; GO:0051781; GO:0008284; GO:0004713; GO:0014066; GO:0023019	Evidence at protein level	SUBCELLULAR LOCATION: Secreted {ECO:0000305}.			SIGNAL 1 20 {ECO:0000255}.
Q14512	FGFBP1	GO:0009986; GO:0007267; GO:0005576; GO:0005615; GO:0008543; GO:0008201; GO:0098779; GO:0008285; GO:0005886; GO:0008284; GO:0002230; GO:0045743; GO:0007165; GO:0098792	Evidence at protein level	SUBCELLULAR LOCATION: Secreted, extracellular space {ECO:0000269|PubMed:11148217, ECO:0000269|PubMed:15806171}. Cell membrane {ECO:0000269|PubMed:11148217, ECO:0000269|PubMed:15806171}; Peripheral membrane protein {ECO:0000269|PubMed:11148217, ECO:0000269|PubMed:15806171}. Note=Extracellular and plasma membrane-associated. Colocalizes with HSPG2 in the pericellular environment of squamous cell ca…			SIGNAL 1 23 {ECO:0000255}.
P98095	FBLN2	GO:0005509; GO:0070062; GO:0031012; GO:0050840; GO:0005201; GO:0005576; GO:1903561; GO:0010811; GO:0005578	Evidence at protein level	SUBCELLULAR LOCATION: Secreted, extracellular space, extracellular matrix.			SIGNAL 1 27 {ECO:0000255}.
O95967	EFEMP2	GO:0005604; GO:0005509; GO:0070062; GO:0005201; GO:0005576; GO:1903561	Evidence at protein level	SUBCELLULAR LOCATION: Secreted.			SIGNAL 1 25 {ECO:0000255}.
P35555	FBN1	GO:0005604; GO:0005509; GO:0043010; GO:1990314; GO:0071560; GO:0048048; GO:0070062; GO:0031012; GO:0030023; GO:0022617; GO:0030198; GO:0005201; GO:0005576; GO:0005615; GO:0007507; GO:0005178; GO:0001656; GO:0001527; GO:0048050; GO:0032403; GO:0005578; GO:0090287; GO:0035582; GO:0035583; GO:0001501	Evidence at protein level	SUBCELLULAR LOCATION: Secreted {ECO:0000269|PubMed:24982166}. Note=Fibrillin-1 and Asprosin chains are still linked together during the secretion from cells, but are subsequentely separated by furin (PubMed:24982166). {ECO:0000269|PubMed:24982166}.; SUBCELLULAR LOCATION: Asprosin: Secreted {ECO:0000269|PubMed:27087445}. Note=Secreted into the plasma. {ECO:0000269|PubMed:27087445}.; SUBCELLULAR LO…			SIGNAL 1 24 {ECO:0000269|PubMed:10636927}.
P35556	FBN2	GO:0060346; GO:0005509; GO:0043010; GO:0048048; GO:0030326; GO:0031012; GO:0030023; GO:0022617; GO:0030198; GO:0005201; GO:0005576; GO:0001527; GO:0030501; GO:0045669; GO:0090287; GO:0035583	Evidence at protein level	SUBCELLULAR LOCATION: Secreted, extracellular space, extracellular matrix.			SIGNAL 1 28 {ECO:0000255}.
O00602	FCN1	GO:0001664; GO:0007186; GO:0030246; GO:0002752; GO:0005581; GO:0006956; GO:0001867; GO:0005576; GO:0031232; GO:0046872; GO:0046597; GO:2000484; GO:0034394; GO:0043654; GO:0004252; GO:0033691; GO:0008329	Evidence at protein level	SUBCELLULAR LOCATION: Secreted {ECO:0000269|PubMed:20400674, ECO:0000269|PubMed:21037097}. Cell membrane {ECO:0000269|PubMed:20400674, ECO:0000269|PubMed:21037097}; Peripheral membrane protein {ECO:0000269|PubMed:20400674, ECO:0000269|PubMed:21037097}; Extracellular side {ECO:0000269|PubMed:20400674, ECO:0000269|PubMed:21037097}. Note=Found on the monocyte and granulocyte surface (PubMed:20400674…			SIGNAL 1 29 {ECO:0000269|PubMed:15340161}.
O76093	FGF18	GO:0016303; GO:0000165; GO:0005088; GO:0009653; GO:0001525; GO:0007267; GO:0002063; GO:0001958; GO:0005576; GO:0005615; GO:0008543; GO:0008083; GO:0001957; GO:0030324; GO:0005730; GO:0046934; GO:0048015; GO:0070374; GO:0043406; GO:0008284; GO:0032332; GO:2000546; GO:0030949; GO:0004713; GO:0014066; GO:0007165; GO:0005105; GO:0005111	Evidence at protein level	SUBCELLULAR LOCATION: Secreted {ECO:0000250}.			SIGNAL 1 27 {ECO:0000255}.
P10767	FGF6	GO:0016303; GO:0000165; GO:0005088; GO:0001525; GO:0001502; GO:0008283; GO:0007267; GO:0005576; GO:0005615; GO:0008543; GO:0008083; GO:0005622; GO:0045445; GO:0046934; GO:0048015; GO:0051781; GO:0008284; GO:0004713; GO:0014066; GO:0042383; GO:0007165	Evidence at protein level	SUBCELLULAR LOCATION: Secreted, extracellular space.			SIGNAL 1 37 {ECO:0000255}.
Q03591	CFHR1	GO:0072562; GO:0006956; GO:0070062; GO:0005615	Evidence at protein level	SUBCELLULAR LOCATION: Secreted.			SIGNAL 1 18 {ECO:0000255}.
Q92496	CFHR4	GO:0005576; GO:0005319	Evidence at protein level	SUBCELLULAR LOCATION: Secreted.			SIGNAL 1 19 {ECO:0000255}.
P02671	FGA	GO:0006953; GO:0002250; GO:0007596; GO:0072377; GO:0072378; GO:0072562; GO:0005938; GO:0009986; GO:0007160; GO:0043623; GO:0044267; GO:1990643; GO:0071354; GO:0071407; GO:0009897; GO:0070062; GO:0030198; GO:0005576; GO:0005615; GO:1903561; GO:0005577; GO:0042730; GO:0043152; GO:0045087; GO:0097421; GO:0046872; GO:2000261; GO:2000352; GO:1902042; GO:0005886; GO:0031639; GO:0070527; GO:0031091; GO:…	Evidence at protein level	SUBCELLULAR LOCATION: Secreted {ECO:0000269|PubMed:19296670, ECO:0000269|PubMed:9628725}.			SIGNAL 1 19 {ECO:0000269|PubMed:518846, ECO:0000269|Ref.10, ECO:0000269|Ref.14}.
Q15485	FCN2	GO:0003823; GO:0072562; GO:0048306; GO:0005581; GO:0006956; GO:0001867; GO:0050829; GO:0050830; GO:0070062; GO:0005576; GO:2001065; GO:0046872; GO:0008228; GO:0043394; GO:0043654; GO:0004252	Evidence at protein level	SUBCELLULAR LOCATION: Secreted.			SIGNAL 1 25 {ECO:0000255}.
P08620	FGF4	GO:0016303; GO:0000165; GO:0005088; GO:0060561; GO:0001502; GO:0007267; GO:0060591; GO:0060363; GO:0035116; GO:0005576; GO:0008543; GO:0008083; GO:0008201; GO:0005622; GO:0010463; GO:0043066; GO:0042475; GO:0046934; GO:0048015; GO:0070374; GO:0051781; GO:0008284; GO:0045944; GO:0004713; GO:2000544; GO:0014066; GO:0007165; GO:0019827	Evidence at protein level	SUBCELLULAR LOCATION: Secreted {ECO:0000305}.			SIGNAL 1 30 {ECO:0000255}.
P21781	FGF7	GO:0016303; GO:0005794; GO:0000165; GO:0005088; GO:0031532; GO:0060445; GO:0042056; GO:0008544; GO:0005576; GO:0005615; GO:0008543; GO:0008083; GO:0031069; GO:0008201; GO:0010463; GO:0001541; GO:0006656; GO:0046934; GO:0048015; GO:0050918; GO:0051781; GO:0008284; GO:0002230; GO:0050679; GO:0060501; GO:0051549; GO:0010838; GO:0050731; GO:0045893; GO:0034394; GO:0004713; GO:0060665; GO:0014066; GO:…	Evidence at protein level	SUBCELLULAR LOCATION: Secreted.			SIGNAL 1 31 {ECO:0000269|PubMed:2475908, ECO:0000269|PubMed:2915979}.
P55075	FGF8	GO:0016303; GO:0030509; GO:0000165; GO:0005088; GO:0009653; GO:0035909; GO:0006915; GO:0001974; GO:0060348; GO:0060445; GO:0001658; GO:0060070; GO:0045165; GO:0090134; GO:0021846; GO:0042056; GO:0060128; GO:0071542; GO:0033563; GO:0035116; GO:0003198; GO:0009897; GO:0005576; GO:0005615; GO:0008543; GO:0021798; GO:0048853; GO:0021884; GO:0007369; GO:0008406; GO:0008083; GO:0001947; GO:0005622; GO:…	Evidence at protein level	SUBCELLULAR LOCATION: Secreted.			SIGNAL 1 22 {ECO:0000255}.
Q8TAT2	FGFBP3	GO:0031012; GO:0005576; GO:0017134; GO:0008201; GO:0045743; GO:0043117	Evidence at protein level	SUBCELLULAR LOCATION: Secreted {ECO:0000269|PubMed:18669637}.			SIGNAL 1 26 {ECO:0000255}.
Q02985	CFHR3	GO:0072562; GO:0070062; GO:0005615	Evidence at protein level	SUBCELLULAR LOCATION: Secreted.			SIGNAL 1 18 {ECO:0000255}.
Q9BXR6	CFHR5	GO:0006957; GO:0005576	Evidence at protein level	SUBCELLULAR LOCATION: Secreted.			SIGNAL 1 18 {ECO:0000255}.
P02751	FN1	GO:0006953; GO:0001525; GO:0016324; GO:0005605; GO:0072562; GO:0007161; GO:0001775; GO:0007155; GO:0007044; GO:0071773; GO:0071333; GO:0071347; GO:0071222; GO:0071288; GO:0036120; GO:0071380; GO:0071560; GO:0035924; GO:0005518; GO:0035987; GO:0005793; GO:0070062; GO:0031012; GO:0022617; GO:0030198; GO:0005576; GO:0005615; GO:0005577; GO:0008347; GO:0008201; GO:0042802; GO:0033622; GO:0005178; GO:…	Evidence at protein level	SUBCELLULAR LOCATION: Secreted, extracellular space, extracellular matrix.			SIGNAL 1 31 {ECO:0000269|PubMed:6630202}.
Q06828	FMOD	GO:0005796; GO:0007409; GO:0030199; GO:0005576; GO:0005615; GO:0008201; GO:0018146; GO:0042340; GO:0043202; GO:0005578; GO:0007181	Evidence at protein level	SUBCELLULAR LOCATION: Secreted, extracellular space, extracellular matrix.			SIGNAL 1 18 {ECO:0000250}.
Q8TAL6	FIBIN	GO:0005794; GO:0005783; GO:0005576	Evidence at protein level	SUBCELLULAR LOCATION: Secreted {ECO:0000250}. Golgi apparatus {ECO:0000250}. Endoplasmic reticulum {ECO:0000269|PubMed:21615908}.			SIGNAL 1 18 {ECO:0000269|PubMed:21615908}.
P41439	FOLR3	GO:0005576; GO:0019898; GO:0005542; GO:0015884; GO:0016020	Evidence at protein level	SUBCELLULAR LOCATION: Secreted.			SIGNAL 1 23 {ECO:0000255}.
Q12841	FSTL1	GO:0030509; GO:0005509; GO:0070062; GO:0005576; GO:0005615; GO:0008201; GO:0042594	Evidence at protein level	SUBCELLULAR LOCATION: Secreted {ECO:0000305}.			SIGNAL 1 20 {ECO:0000269|PubMed:15340161}.
O95633	FSTL3	GO:0005794; GO:0048185; GO:0030325; GO:0071248; GO:0005576; GO:0005615; GO:0001968; GO:0002244; GO:0001822; GO:0030324; GO:0008584; GO:0030514; GO:0032926; GO:0045671; GO:0090101; GO:0044306; GO:0005654; GO:0005634; GO:0001503; GO:0022409; GO:0045944; GO:0006357; GO:0030141; GO:0007283; GO:0006351	Evidence at protein level	SUBCELLULAR LOCATION: Isoform 1: Secreted.; SUBCELLULAR LOCATION: Isoform 2: Nucleus. Note=Although alternative initiation has been demonstrated and resulted in different localization, the major source of nuclear FSTL3 appears not to depend on translation initiation at Met-27 according to. {ECO:0000269|PubMed:16150905}.			SIGNAL 1 26 {ECO:0000269|PubMed:15340161}.
P19883	FST	GO:0048185; GO:0005576; GO:0002244; GO:0032926; GO:0000122; GO:0051798; GO:0004871	Evidence at protein level	SUBCELLULAR LOCATION: Secreted.			SIGNAL 1 29 {ECO:0000269|PubMed:15340161}.
O15520	FGF10	GO:0016303; GO:0070371; GO:0070384; GO:0000165; GO:0005088; GO:0060510; GO:0031532; GO:0000187; GO:0001525; GO:0001974; GO:0060667; GO:0048754; GO:0060436; GO:0060449; GO:0060447; GO:0009986; GO:0042056; GO:0007368; GO:0031076; GO:0048557; GO:0030538; GO:0009880; GO:0010631; GO:0050673; GO:0060664; GO:0000132; GO:0005576; GO:0005615; GO:0048807; GO:0005104; GO:0008543; GO:0060595; GO:0008083; GO:…	Evidence at protein level	SUBCELLULAR LOCATION: Secreted {ECO:0000305}.			SIGNAL 1 37 {ECO:0000255}.
Q9BTY2	FUCA2	GO:0004560; GO:0070062; GO:0005615; GO:0006004; GO:0016139; GO:2000535; GO:0009617	Evidence at protein level	SUBCELLULAR LOCATION: Secreted {ECO:0000305}.			SIGNAL 1 28 {ECO:0000255}.
P22466	GAL	GO:0005794; GO:0019933; GO:0005576; GO:0005615; GO:0007631; GO:0004966; GO:0006954; GO:0030073; GO:0050672; GO:1902891; GO:0007399; GO:0043025; GO:0005184; GO:0043065; GO:0051795; GO:0051464; GO:1902608; GO:0045944; GO:0010737; GO:0031943; GO:0042493; GO:0043627; GO:0035902; GO:0032868; GO:0030141; GO:0031764; GO:0031765; GO:0031766	Evidence at protein level	SUBCELLULAR LOCATION: Secreted {ECO:0000269|PubMed:1370155, ECO:0000269|PubMed:1722333}.			SIGNAL 1 19 {ECO:0000255}.
P01225	FSHB	GO:0060011; GO:0005737; GO:0070062; GO:0005576; GO:0007292; GO:0007565; GO:0016913; GO:0042699; GO:0005179; GO:0016486; GO:0045780; GO:0030335; GO:0008284; GO:0045944; GO:0006701; GO:0045670; GO:0007165; GO:0007179	Evidence at protein level	SUBCELLULAR LOCATION: Secreted.			SIGNAL 1 18 {ECO:0000269|PubMed:3151250}.
P07093	SERPINE2	GO:0007596; GO:0021683; GO:0005829; GO:0061110; GO:0050974; GO:0007566; GO:0031012; GO:0005576; GO:0005615; GO:1903561; GO:0031232; GO:0005539; GO:0008201; GO:0060384; GO:0060291; GO:0042628; GO:0030195; GO:0030308; GO:0008285; GO:0014067; GO:0010757; GO:0090331; GO:0042177; GO:0010955; GO:0045861; GO:0045879; GO:0010766; GO:0031594; GO:0043025; GO:0031091; GO:0048711; GO:0010976; GO:0005102; GO:…	Evidence at protein level	SUBCELLULAR LOCATION: Secreted, extracellular space.			SIGNAL 1 19 {ECO:0000269|PubMed:15340161, ECO:0000269|PubMed:3997857}.
O95390	GDF11	GO:0060395; GO:0048593; GO:0048468; GO:0048469; GO:0005125; GO:0005615; GO:0040007; GO:0043231; GO:0007498; GO:0001656; GO:0008285; GO:0045665; GO:0007399; GO:0005654; GO:0060021; GO:0031016; GO:0010862; GO:0043234; GO:0043408; GO:0042981; GO:0001501; GO:0021512; GO:0005160; GO:0001657	Evidence at protein level	SUBCELLULAR LOCATION: Secreted {ECO:0000305}.			SIGNAL 1 24 {ECO:0000255}.
Q9NR23	GDF3	GO:0060395; GO:0048468; GO:0005125; GO:0005737; GO:0007492; GO:0005615; GO:0001654; GO:0048859; GO:0040007; GO:0001701; GO:0007498; GO:0030514; GO:0045605; GO:0045662; GO:0030903; GO:0010862; GO:0090009; GO:0019901; GO:0043408; GO:0042981; GO:0010453; GO:0002021; GO:0001501; GO:0032525; GO:0005160	Evidence at protein level	SUBCELLULAR LOCATION: Secreted {ECO:0000305}.			SIGNAL 1 24 {ECO:0000255}.
P01350	GAST	GO:0007186; GO:0005576; GO:0005615; GO:0005179; GO:0032094; GO:0007165	Evidence at protein level	SUBCELLULAR LOCATION: Secreted.			SIGNAL 1 21 {ECO:0000269|PubMed:8055952}.
Q9UK05	GDF2	GO:0030509; GO:0060395; GO:0032924; GO:0001525; GO:0048514; GO:0051216; GO:0005623; GO:0048468; GO:0006879; GO:0071773; GO:0005125; GO:0070062; GO:0005615; GO:0040007; GO:2000279; GO:0008156; GO:0016525; GO:0043537; GO:0030308; GO:0010596; GO:0001937; GO:0001503; GO:0001649; GO:0060389; GO:0001569; GO:0030513; GO:0045766; GO:0061036; GO:0045603; GO:0001938; GO:0032757; GO:0045669; GO:0010862; GO:…	Evidence at protein level	SUBCELLULAR LOCATION: Secreted {ECO:0000269|PubMed:18309101}.			SIGNAL 1 22 {ECO:0000255}.
Q6KF10	GDF6	GO:0030509; GO:0060395; GO:0032924; GO:0006915; GO:0048468; GO:0005125; GO:0005615; GO:0045444; GO:0040007; GO:0060389; GO:0032332; GO:0045666; GO:1900745; GO:0010862; GO:0045893; GO:0043408; GO:0042981; GO:1990009; GO:0005160	Evidence at protein level	SUBCELLULAR LOCATION: Secreted {ECO:0000269|PubMed:23307924}.			SIGNAL 1 22 {ECO:0000255}.
P01215	CGA	GO:0005796; GO:0007267; GO:0005576; GO:0005179; GO:0016486; GO:0030335; GO:0008284; GO:0045944; GO:0007165	Evidence at protein level	SUBCELLULAR LOCATION: Secreted.			SIGNAL 1 24 {ECO:0000269|PubMed:1150658, ECO:0000269|PubMed:1158880, ECO:0000269|PubMed:4745444, ECO:0000269|PubMed:481597}.
Q14393	GAS6	GO:0035754; GO:0006888; GO:0005796; GO:0032148; GO:0043277; GO:0060090; GO:0005509; GO:0070588; GO:0007155; GO:0007050; GO:0016477; GO:0008283; GO:0031589; GO:0035690; GO:0071333; GO:0071363; GO:0035457; GO:0009267; GO:0071307; GO:0043027; GO:0005737; GO:0097028; GO:0005788; GO:0007167; GO:0070062; GO:0085029; GO:0005576; GO:0005615; GO:0019064; GO:0097241; GO:0050900; GO:0010934; GO:0043066; GO:…	Evidence at protein level	SUBCELLULAR LOCATION: Secreted {ECO:0000269|PubMed:9326369}.			SIGNAL 1 30 {ECO:0000255}.
P27539	GDF1	GO:0030509; GO:0060395; GO:0048468; GO:0005125; GO:0005615; GO:0010862; GO:0043408; GO:0042981; GO:0005160	Evidence at protein level	SUBCELLULAR LOCATION: Secreted.			SIGNAL 1 29 {ECO:0000255}.
P43026	GDF5	GO:0036122; GO:0007184; GO:0060395; GO:0048468; GO:0007267; GO:0060591; GO:0002062; GO:0005125; GO:0030326; GO:0005576; GO:0005615; GO:0035136; GO:0040007; GO:0008083; GO:0035137; GO:0042802; GO:0005622; GO:0098779; GO:0032331; GO:0050680; GO:2001054; GO:0043524; GO:0005886; GO:0030513; GO:0032332; GO:0045666; GO:0010862; GO:0043408; GO:0042981; GO:0040014; GO:0005160; GO:0007179	Evidence at protein level	SUBCELLULAR LOCATION: Secreted {ECO:0000269|PubMed:11276205}. Cell membrane {ECO:0000269|PubMed:11276205}.			SIGNAL 1 27 {ECO:0000255}.
P39905	GDNF	GO:0000165; GO:0005088; GO:0008344; GO:0001658; GO:0048484; GO:0005576; GO:0005622; GO:0048255; GO:0003337; GO:0001656; GO:0043066; GO:2001240; GO:0043524; GO:0007399; GO:0001755; GO:0031175; GO:0001759; GO:0030432; GO:0090190; GO:0045597; GO:0008284; GO:0033603; GO:0072108; GO:0032770; GO:0045944; GO:0072107; GO:0021784; GO:0001941; GO:0042803; GO:0005102; GO:0051584; GO:0010468; GO:0060688; GO:…	Evidence at protein level	SUBCELLULAR LOCATION: Secreted {ECO:0000269|PubMed:9811930}.			SIGNAL 1 19 {ECO:0000255}.
Q86XP6	GKN2	GO:0045178; GO:0005615; GO:0042127	Evidence at protein level	SUBCELLULAR LOCATION: Secreted.			SIGNAL 1 20 {ECO:0000255}.
O14793	MSTN	GO:0060395; GO:0048468; GO:0071549; GO:0005125; GO:0005737; GO:0005615; GO:0008083; GO:0008201; GO:0042802; GO:0098779; GO:0046716; GO:0007517; GO:0046627; GO:0033673; GO:0014741; GO:0045662; GO:2000818; GO:0051898; GO:1902725; GO:1902723; GO:0048632; GO:0022602; GO:0002230; GO:0010862; GO:0045893; GO:0005102; GO:0043408; GO:0042981; GO:0051602; GO:0043627; GO:0045471; GO:0009629; GO:0009408; GO:…	Evidence at protein level	SUBCELLULAR LOCATION: Secreted.			SIGNAL 1 23 {ECO:0000255}.
O60383	GDF9	GO:0030509; GO:0060395; GO:0048468; GO:0005125; GO:0005737; GO:0005615; GO:0007292; GO:0008083; GO:0030308; GO:0001555; GO:0008284; GO:0010862; GO:0043408; GO:0042981; GO:2000870; GO:0005160; GO:0007179	Evidence at protein level	SUBCELLULAR LOCATION: Secreted {ECO:0000250}.			SIGNAL 1 24 {ECO:0000255}.
Q92820	GGH	GO:0005829; GO:0008238; GO:0070062; GO:0005615; GO:0034722; GO:0006541; GO:0005764; GO:0042470; GO:0005634; GO:0008242; GO:0042493; GO:0045471; GO:0032868; GO:0010043; GO:0046900; GO:0005773	Evidence at protein level	SUBCELLULAR LOCATION: Secreted, extracellular space {ECO:0000305}. Lysosome {ECO:0000269|PubMed:12643545}. Melanosome {ECO:0000269|PubMed:12643545}. Note=While its intracellular location is primarily the lysosome, most of the enzyme activity is secreted. Identified by mass spectrometry in melanosome fractions from stage I to stage IV. {ECO:0000269|PubMed:12643545}.			SIGNAL 1 24 {ECO:0000250}.
P06396	GSN	GO:0003779; GO:0030478; GO:0015629; GO:0051693; GO:0030041; GO:0090527; GO:0051014; GO:0045010; GO:0007568; GO:1990000; GO:0051016; GO:0072562; GO:0005509; GO:0044267; GO:0071276; GO:0060271; GO:0030864; GO:0005737; GO:0005829; GO:0070062; GO:0005576; GO:0005615; GO:0005925; GO:0097284; GO:0030027; GO:0043209; GO:0045159; GO:0046597; GO:0014003; GO:0048471; GO:0006911; GO:0048015; GO:0005886; GO:…	Evidence at protein level	SUBCELLULAR LOCATION: Isoform 2: Cytoplasm, cytoskeleton.; SUBCELLULAR LOCATION: Isoform 1: Secreted.			SIGNAL 1 27
Q9NXC2	GFOD1	GO:0005576; GO:0055114; GO:0016491	Evidence at protein level	SUBCELLULAR LOCATION: Secreted {ECO:0000305}.			SIGNAL 1 21 {ECO:0000255}.
Q9UBU3	GHRL	GO:0001664; GO:0007186; GO:0008154; GO:0000187; GO:0008343; GO:0030424; GO:0051216; GO:0043400; GO:0005829; GO:0046697; GO:0016358; GO:0005788; GO:0060079; GO:0005576; GO:0005615; GO:0001696; GO:0031768; GO:0006006; GO:0030252; GO:0016608; GO:0009755; GO:0016525; GO:0043066; GO:0042322; GO:0001937; GO:2000506; GO:0050728; GO:0046676; GO:0032691; GO:0045409; GO:0040013; GO:0042536; GO:0032100; GO:…	Evidence at protein level	SUBCELLULAR LOCATION: Secreted.			SIGNAL 1 23 {ECO:0000269|PubMed:10930375, ECO:0000269|PubMed:15340161}.
Q96T91	GPHA2	GO:0005576; GO:1903955	Evidence at protein level	SUBCELLULAR LOCATION: Secreted.			SIGNAL 1 23 {ECO:0000255}.
P13284	IFI30	GO:0042590; GO:0019886; GO:0030054; GO:0005737; GO:0005576; GO:0060333; GO:0043231; GO:0043202; GO:0005764; GO:0048147; GO:0016667; GO:0005886; GO:0050821	Evidence at protein level	SUBCELLULAR LOCATION: Secreted. Lysosome.			SIGNAL 1 26 {ECO:0000255}.
P09681	GIP	GO:0008344; GO:0055123; GO:0031018; GO:0005788; GO:0035640; GO:0005576; GO:0005615; GO:0007565; GO:0005179; GO:0060291; GO:0007613; GO:0043025; GO:0043950; GO:0070094; GO:0010828; GO:0032024; GO:0050796; GO:0010447; GO:0043200; GO:0048678; GO:0042493; GO:0009749; GO:0033993; GO:0014070; GO:0043434; GO:0010269; GO:0042594; GO:0034774; GO:0019233; GO:0007165; GO:0070328	Evidence at protein level	SUBCELLULAR LOCATION: Secreted.			SIGNAL 1 21 {ECO:0000255}.
P22749	GNLY	GO:0006968; GO:0042742; GO:0050832; GO:0005615; GO:0031640	Evidence at protein level	SUBCELLULAR LOCATION: Secreted. Note=Located in the cytotoxic granules of T-cells, which are released upon antigen stimulation.			SIGNAL 1 22 {ECO:0000255}.
Q86YW7	GPHB5	GO:0005576; GO:0002155	Evidence at protein level	SUBCELLULAR LOCATION: Secreted.			SIGNAL 1 24 {ECO:0000255}.
P01275	GCG	GO:0007186; GO:0007188; GO:0008283; GO:0071377; GO:0005788; GO:0005576; GO:0005615; GO:0007631; GO:0031769; GO:0005179; GO:0042802; GO:0043066; GO:0032099; GO:1900118; GO:2001243; GO:0005886; GO:0070374; GO:0030819; GO:0090280; GO:0035948; GO:0051571; GO:0035774; GO:0033138; GO:0010800; GO:0032092; GO:0045860; GO:0010737; GO:0005102; GO:0050796; GO:0042594; GO:0034774; GO:0007165	Evidence at protein level	SUBCELLULAR LOCATION: Secreted.			SIGNAL 1 20
P01148	GNRH1	GO:0005798; GO:0007568; GO:0043679; GO:0007267; GO:0098556; GO:0030425; GO:0044849; GO:0005576; GO:0005615; GO:0007565; GO:0005183; GO:0005179; GO:0030238; GO:0005739; GO:0007275; GO:0043066; GO:0008285; GO:0033087; GO:2001223; GO:1990008; GO:0043204; GO:0010468; GO:2000354; GO:0031960; GO:0045471; GO:0032496; GO:0035864; GO:1990637; GO:0034695; GO:0033574; GO:0007165	Evidence at protein level	SUBCELLULAR LOCATION: Secreted.			SIGNAL 1 23 {ECO:0000269|PubMed:6760865}.
Q6UWM5	GLIPR1L1	GO:0001669; GO:0007339; GO:0005576; GO:0097224	Evidence at protein level	SUBCELLULAR LOCATION: Secreted {ECO:0000305}.			SIGNAL 1 22 {ECO:0000269|PubMed:15340161}.
P22352	GPX3	GO:0070062; GO:0005576; GO:0005615; GO:0004602; GO:0042744; GO:0051289; GO:0006982; GO:0000302; GO:0008430; GO:0008134	Evidence at protein level	SUBCELLULAR LOCATION: Secreted.			SIGNAL 1 20 {ECO:0000255}.
P49863	GZMK	GO:0005576; GO:0004252; GO:0008236	Evidence at protein level	SUBCELLULAR LOCATION: Secreted. Cytoplasmic granule.			SIGNAL 1 24 {ECO:0000255}.
P51124	GZMM	GO:0006915; GO:0008219; GO:0019835; GO:0005576; GO:0045087; GO:0016020; GO:0004252; GO:0008236	Evidence at protein level	SUBCELLULAR LOCATION: Secreted. Cytoplasmic granule. Note=Granules of large granular lymphocytes.			SIGNAL 1 23 {ECO:0000255}.
O75715	GPX5	GO:0034599; GO:0005576; GO:0005615; GO:0004602; GO:0006629; GO:0000302; GO:0097524	Evidence at protein level	SUBCELLULAR LOCATION: Secreted.			SIGNAL 1 21 {ECO:0000255}.
P09341	CXCL1	GO:0045236; GO:0007186; GO:0030036; GO:0008283; GO:0008009; GO:0070098; GO:0006935; GO:0008047; GO:0005576; GO:0005615; GO:0006955; GO:0006954; GO:0005622; GO:0035556; GO:0008285; GO:0007399; GO:0090023; GO:0005102; GO:0032496; GO:0007165	Evidence at protein level	SUBCELLULAR LOCATION: Secreted.			SIGNAL 1 34 {ECO:0000269|PubMed:10095777, ECO:0000269|PubMed:15340161, ECO:0000269|PubMed:1755384, ECO:0000269|PubMed:2182761, ECO:0000269|PubMed:2655583}.
Q96SL4	GPX7	GO:0004096; GO:0005783; GO:0005788; GO:0005576; GO:0004602; GO:0004601; GO:0000302	Evidence at protein level	SUBCELLULAR LOCATION: Secreted {ECO:0000305}.			SIGNAL 1 19 {ECO:0000255}.
P07492	GRP	GO:0005576; GO:0005615; GO:0005184; GO:0007218; GO:0005102; GO:0007165	Evidence at protein level	SUBCELLULAR LOCATION: Secreted.			SIGNAL 1 23
P12544	GZMA	GO:0006915; GO:0019835; GO:0005576; GO:0006955; GO:0001772; GO:0043392; GO:0032078; GO:0051354; GO:0005634; GO:0043065; GO:0042803; GO:0051603; GO:0004252	Evidence at protein level	SUBCELLULAR LOCATION: Isoform alpha: Secreted. Cytoplasmic granule.			SIGNAL 1 26 In isoform alpha.
P28799	GRN	GO:0035988; GO:0005829; GO:0070062; GO:0005615; GO:0008083; GO:0043231; GO:0060179; GO:0061351; GO:0044822; GO:0060999; GO:0032355; GO:0007165; GO:0048488	Evidence at protein level	SUBCELLULAR LOCATION: Secreted.			SIGNAL 1 17 {ECO:0000255}.
Q14520	HABP2	GO:0005509; GO:0007155; GO:0005576; GO:0005615; GO:0005539; GO:0004252	Evidence at protein level	SUBCELLULAR LOCATION: Secreted {ECO:0000269|PubMed:8827452}. Note=Secreted as an inactive single-chain precursor and is then activated to a heterodimeric form.			SIGNAL 1 23 {ECO:0000269|PubMed:8827452}.
O60565	GREM1	GO:0036122; GO:0006915; GO:0001658; GO:0002042; GO:0000902; GO:0009986; GO:0007267; GO:0030199; GO:0048263; GO:0030326; GO:0005615; GO:0060173; GO:0003337; GO:0016015; GO:0030514; GO:0043066; GO:0030502; GO:1900158; GO:0046851; GO:1900155; GO:0090191; GO:0090090; GO:0030308; GO:0032331; GO:0090027; GO:0033689; GO:0090291; GO:0060394; GO:0045892; GO:0042346; GO:0051092; GO:0045766; GO:0090190; GO:…	Evidence at protein level	SUBCELLULAR LOCATION: Secreted {ECO:0000305}.			SIGNAL 1 24 {ECO:0000269|PubMed:15340161}.
Q02747	GUCA2A	GO:0070062; GO:0005576; GO:0030250; GO:0005179	Evidence at protein level	SUBCELLULAR LOCATION: Secreted.			SIGNAL 1 21 {ECO:0000269|PubMed:8095028}.
P15516	HTN3	GO:0031214; GO:0042742; GO:0050832; GO:0005576; GO:0031640; GO:0046872	Evidence at protein level	SUBCELLULAR LOCATION: Secreted {ECO:0000269|PubMed:14966203}. Note=Secreted by serous acinar and demilune cells.			SIGNAL 1 19 {ECO:0000269|PubMed:15272024, ECO:0000269|PubMed:2372245, ECO:0000269|PubMed:3286634}.
P26927	MST1	GO:0070062; GO:0005576; GO:0005615; GO:0048012; GO:0045721; GO:0030971; GO:2000479; GO:0004252	Evidence at protein level	SUBCELLULAR LOCATION: Secreted.			SIGNAL 1 18 {ECO:0000255}.
Q6UWX4	HHIPL2	GO:0005975; GO:0005576; GO:0016901; GO:0048038	Evidence at protein level	SUBCELLULAR LOCATION: Secreted {ECO:0000305}.			SIGNAL 1 41 {ECO:0000255}.
P02790	HPX	GO:0072562; GO:0006879; GO:0071682; GO:0070062; GO:0005576; GO:0005615; GO:0042168; GO:0015886; GO:0015232; GO:0020027; GO:0046872; GO:0002925; GO:0002639; GO:0060335; GO:0042511; GO:0006898; GO:0016032	Evidence at protein level	SUBCELLULAR LOCATION: Secreted.			SIGNAL 1 23 {ECO:0000269|PubMed:3855550, ECO:0000269|PubMed:6510521}.
Q04756	HGFAC	GO:0005576; GO:0005615; GO:0006508; GO:0004252; GO:0008236	Evidence at protein level	SUBCELLULAR LOCATION: Secreted. Note=Secreted as an inactive single-chain precursor and is then activated to a heterodimeric form.			SIGNAL 1 35 {ECO:0000269|PubMed:15340161}.
Q8WWQ2	HPSE2	GO:0005975; GO:0030198; GO:0006027; GO:0043395; GO:0030305; GO:0005622; GO:0005886; GO:0008284; GO:0005578	Evidence at protein level	SUBCELLULAR LOCATION: Secreted, extracellular space, extracellular matrix {ECO:0000269|PubMed:20576607}.			SIGNAL 1 41 {ECO:0000255}.
P81172	HAMP	GO:0045179; GO:0005623; GO:0006879; GO:0042742; GO:0050832; GO:0005576; GO:0005615; GO:0005179; GO:0006955; GO:0097690; GO:0031640; GO:0060586; GO:1904039; GO:1904479; GO:0032413; GO:1904255; GO:0000122; GO:1902916; GO:2000646; GO:0002092; GO:0005102; GO:0010039	Evidence at protein level	SUBCELLULAR LOCATION: Secreted.			SIGNAL 1 24 {ECO:0000255}.
Q96QV1	HHIP	GO:0005975; GO:0009986; GO:0060170; GO:0005737; GO:0009953; GO:0060441; GO:0005576; GO:0097108; GO:0005887; GO:0009968; GO:0045879; GO:0007405; GO:0016901; GO:0048038; GO:0040036; GO:0048705; GO:0007224; GO:0008270	Evidence at protein level	SUBCELLULAR LOCATION: Cell membrane {ECO:0000250}; Peripheral membrane protein {ECO:0000250}. Secreted {ECO:0000250}. Note=The last 22 C-terminal amino acids may participate in cell membrane attachment.; SUBCELLULAR LOCATION: Isoform 2: Cytoplasm {ECO:0000305}.			SIGNAL 1 17 {ECO:0000255}.
P00738	HP	GO:0006953; GO:0016209; GO:0072562; GO:0006952; GO:0042742; GO:0071682; GO:0070062; GO:0005576; GO:0005615; GO:0031838; GO:0030492; GO:0002376; GO:2000296; GO:0051354; GO:0010942; GO:0006898; GO:0042542	Evidence at protein level	SUBCELLULAR LOCATION: Secreted.			SIGNAL 1 18 {ECO:0000269|PubMed:6997877}.
P15515	HTN1	GO:0031214; GO:0042742; GO:0050832; GO:0005576; GO:0046848; GO:0031640	Evidence at protein level	SUBCELLULAR LOCATION: Secreted.			SIGNAL 1 19 {ECO:0000269|PubMed:2372245, ECO:0000269|PubMed:3286634, ECO:0000269|PubMed:3944083}.
Q9Y251	HPSE	GO:0060055; GO:0004566; GO:0005975; GO:0007160; GO:0030198; GO:0006027; GO:0043395; GO:0030200; GO:0030305; GO:0043231; GO:0043202; GO:0005765; GO:0005764; GO:0045121; GO:0005654; GO:0005634; GO:0030194; GO:0051798; GO:0033690; GO:0051897; GO:0010575; GO:0046983; GO:0005578; GO:0006029; GO:0051797; GO:0045545; GO:0061042	Evidence at protein level	SUBCELLULAR LOCATION: Lysosome membrane; Peripheral membrane protein. Secreted. Nucleus. Note=Proheparanase is secreted via vesicles of the Golgi. Interacts with cell membrane heparan sulfate proteoglycans (HSPGs). Endocytosed and accumulates in endosomes. Transferred to lysosomes where it is proteolytically cleaved to produce the active enzyme. Under certain stimuli, transferred to the cell surf…			SIGNAL 1 35 {ECO:0000269|PubMed:12713442}.
P83110	HTRA3	GO:0004175; GO:0005576; GO:0030514; GO:0030512; GO:0006508; GO:0001558; GO:0004252; GO:0008236	Evidence at protein level	SUBCELLULAR LOCATION: Secreted {ECO:0000269|PubMed:21321049}. Note=Secretion increased during decidualization of endometrial stromal cells.			SIGNAL 1 17 {ECO:0000255}.
Q12794	HYAL1	GO:0005975; GO:0051216; GO:0071493; GO:0044344; GO:0071347; GO:0071467; GO:0036120; GO:0071356; GO:0030207; GO:0005737; GO:0031410; GO:0060272; GO:0070062; GO:0005615; GO:0036117; GO:0030213; GO:0030214; GO:0030212; GO:0050501; GO:0004415; GO:0006954; GO:0043202; GO:0005764; GO:0030308; GO:0045766; GO:0045785; GO:0030307; GO:0010634; GO:0050679; GO:0045927; GO:1900106; GO:0046677; GO:0000302; GO:…	Evidence at protein level	SUBCELLULAR LOCATION: Secreted {ECO:0000269|PubMed:9223416}. Lysosome {ECO:0000269|PubMed:9223416}.			SIGNAL 1 21 {ECO:0000255}.
Q16270	IGFBP7	GO:0007155; GO:0070062; GO:0005576; GO:0005615; GO:0008285; GO:0001558	Evidence at protein level	SUBCELLULAR LOCATION: Secreted.			SIGNAL 1 26 {ECO:0000269|PubMed:15340161, ECO:0000269|PubMed:8117260, ECO:0000269|PubMed:8939990}.
P04196	HRG	GO:0001525; GO:0072562; GO:0006935; GO:0004869; GO:0050832; GO:0036019; GO:0070062; GO:0005576; GO:0042730; GO:0020037; GO:0015886; GO:0043395; GO:0008201; GO:0019865; GO:0046872; GO:0016525; GO:0043537; GO:0007162; GO:0033629; GO:0030308; GO:0008285; GO:2001027; GO:0051918; GO:0010593; GO:1900747; GO:0005886; GO:0030168; GO:0031093; GO:0002576; GO:0043065; GO:2000504; GO:0051894; GO:0002839; GO:…	Evidence at protein level	SUBCELLULAR LOCATION: Secreted {ECO:0000269|PubMed:21215706}.			SIGNAL 1 18 {ECO:0000269|PubMed:1459097}.
Q92743	HTRA1	GO:0060718; GO:0005829; GO:0097187; GO:0070062; GO:0031012; GO:0022617; GO:0005576; GO:0005615; GO:0030514; GO:0050687; GO:0030512; GO:0001890; GO:0005886; GO:0050679; GO:0006508; GO:0001558; GO:0004252; GO:0008236	Evidence at protein level	SUBCELLULAR LOCATION: Cell membrane {ECO:0000269|PubMed:21297635}. Secreted {ECO:0000269|PubMed:15208355, ECO:0000269|PubMed:9852107}. Cytoplasm, cytosol {ECO:0000269|PubMed:15208355, ECO:0000269|PubMed:20671064}. Note=Predominantly secreted (PubMed:15208355). Also found associated with the plasma membrane (PubMed:21297635). {ECO:0000269|PubMed:15208355, ECO:0000269|PubMed:21297635}.			SIGNAL 1 22 {ECO:0000255}.
P08833	IGFBP1	GO:0036499; GO:0044267; GO:0005576; GO:0005615; GO:0008286; GO:0031994; GO:0031995; GO:0005520; GO:0090090; GO:0030307; GO:0005102; GO:0043567; GO:0007165; GO:0042246	Evidence at protein level	SUBCELLULAR LOCATION: Secreted.			SIGNAL 1 25 {ECO:0000269|PubMed:19765076, ECO:0000269|PubMed:2466665, ECO:0000269|PubMed:2971653}.
P01568	IFNA21	GO:0030183; GO:0042100; GO:0002286; GO:0002250; GO:0007596; GO:0005125; GO:0005126; GO:0019221; GO:0051607; GO:0005576; GO:0005615; GO:0006959; GO:0045087; GO:0002323; GO:0033141; GO:0060338; GO:0043330; GO:0005132; GO:0060337	Evidence at protein level	SUBCELLULAR LOCATION: Secreted.			SIGNAL 1 23 {ECO:0000269|PubMed:1634550, ECO:0000269|PubMed:9425112}.
P01563	IFNA2	GO:0030183; GO:0042100; GO:0002286; GO:0006915; GO:0007596; GO:0007166; GO:0007267; GO:0005125; GO:0019221; GO:0051607; GO:0005576; GO:0005615; GO:0006959; GO:0006954; GO:0045087; GO:0002323; GO:0045581; GO:2000552; GO:0010629; GO:2000666; GO:2000663; GO:0045892; GO:0046597; GO:0033141; GO:0042327; GO:0045893; GO:0042517; GO:0060338; GO:0043330; GO:0005132; GO:0060337	Evidence at protein level	SUBCELLULAR LOCATION: Secreted.			SIGNAL 1 23 {ECO:0000269|PubMed:6159537, ECO:0000269|PubMed:9425112}.
P32881	IFNA8	GO:0030183; GO:0042100; GO:0002286; GO:0002250; GO:0007596; GO:0005125; GO:0005126; GO:0019221; GO:0051607; GO:0005576; GO:0005615; GO:0006959; GO:0045087; GO:0002323; GO:0033141; GO:0060338; GO:0043330; GO:0005132; GO:0060337	Evidence at protein level	SUBCELLULAR LOCATION: Secreted.			SIGNAL 1 23 {ECO:0000269|PubMed:9425112}.
P01574	IFNB1	GO:0002312; GO:0030183; GO:0042100; GO:0002286; GO:0002250; GO:0007596; GO:0007166; GO:0071549; GO:0071360; GO:0035458; GO:0098586; GO:0008811; GO:0005125; GO:0042742; GO:0051607; GO:0005576; GO:0005615; GO:0006959; GO:0030101; GO:0002323; GO:0045581; GO:2000552; GO:0045071; GO:2001235; GO:0045089; GO:0033141; GO:0045944; GO:0045343; GO:0060338; GO:0043330; GO:0009615; GO:0005132; GO:0060337	Evidence at protein level	SUBCELLULAR LOCATION: Secreted.			SIGNAL 1 21
O95998	IL18BP	GO:0042088; GO:0070301; GO:0071356; GO:0070062; GO:0005576; GO:0005615; GO:0042007; GO:0048019; GO:0032496	Evidence at protein level	SUBCELLULAR LOCATION: Secreted {ECO:0000305}.			SIGNAL 1 30 {ECO:0000269|PubMed:10023777, ECO:0000269|PubMed:10094485, ECO:0000269|PubMed:15340161}.
Q969J5	IL22RA2	GO:0005829; GO:0005576; GO:0005615; GO:0016021; GO:0042017; GO:0042018; GO:0050728; GO:0005886; GO:0042516	Evidence at protein level	SUBCELLULAR LOCATION: Secreted {ECO:0000269|PubMed:12700595}.			SIGNAL 1 21 {ECO:0000269|PubMed:15340161}.
P17936	IGFBP3	GO:0006915; GO:0044267; GO:0070062; GO:0005576; GO:0005615; GO:0001968; GO:0031994; GO:0031995; GO:0005520; GO:0016942; GO:0042567; GO:0046872; GO:0008285; GO:0001933; GO:0009968; GO:0014912; GO:0048662; GO:0005634; GO:0001649; GO:0043410; GO:0043065; GO:0043568; GO:0045663; GO:0006468; GO:0008160; GO:0042981; GO:0001558; GO:0010906; GO:0043567; GO:0044342	Evidence at protein level	SUBCELLULAR LOCATION: Secreted {ECO:0000269|PubMed:20353938}.			SIGNAL 1 27 {ECO:0000269|PubMed:15340161, ECO:0000269|PubMed:1697583, ECO:0000269|PubMed:1726837}.
P01570	IFNA14	GO:0030183; GO:0042100; GO:0002286; GO:0002250; GO:0007596; GO:0005125; GO:0005126; GO:0019221; GO:0051607; GO:0005576; GO:0005615; GO:0006959; GO:0045087; GO:0002323; GO:0033141; GO:0060338; GO:0043330; GO:0005132; GO:0060337	Evidence at protein level	SUBCELLULAR LOCATION: Secreted.			SIGNAL 1 23 {ECO:0000269|PubMed:1634550, ECO:0000269|PubMed:7765487, ECO:0000269|PubMed:9425112}.
P01562	IFNA1	GO:0030183; GO:0042100; GO:0002286; GO:0002250; GO:0007596; GO:0005125; GO:0019221; GO:0051607; GO:0005576; GO:0005615; GO:0006959; GO:0045087; GO:0002323; GO:0033141; GO:0060338; GO:0043330; GO:0005132; GO:0060337	Evidence at protein level	SUBCELLULAR LOCATION: Secreted.			SIGNAL 1 23 {ECO:0000269|PubMed:1634550, ECO:0000269|PubMed:9425112}.
Q8IU54	IFNL1	GO:0007259; GO:0051607; GO:0005576; GO:0005615; GO:0045087; GO:0032003; GO:0032002; GO:0005622; GO:0045581; GO:0008285; GO:0032696; GO:0032714; GO:0043381; GO:0045892; GO:0002829; GO:0046427; GO:0045345; GO:0050778; GO:0032729; GO:0045893; GO:0042531; GO:0005102	Evidence at protein level	SUBCELLULAR LOCATION: Secreted.			SIGNAL 1 19 {ECO:0000255}.
P01344	IGF2	GO:0044267; GO:0071260; GO:0070062; GO:0005576; GO:0005615; GO:0007565; GO:0006006; GO:0008083; GO:0005158; GO:0008286; GO:0038028; GO:0005159; GO:0007613; GO:0007275; GO:0045953; GO:0001503; GO:0005886; GO:0031093; GO:0002576; GO:0043410; GO:0042104; GO:0043085; GO:0008284; GO:2000467; GO:0045725; GO:0046628; GO:0045840; GO:0050731; GO:0051897; GO:0001934; GO:0043539; GO:0030546; GO:0006349; GO:…	Evidence at protein level	SUBCELLULAR LOCATION: Secreted {ECO:0000269|PubMed:16040806}.			SIGNAL 1 24 {ECO:0000269|PubMed:658418, ECO:0000269|PubMed:7633596}.
P01591	JCHAIN	GO:0019862; GO:0002250; GO:0019731; GO:0003823; GO:0072562; GO:0071750; GO:0070062; GO:0005576; GO:0005615; GO:0003094; GO:0006955; GO:0045087; GO:0071748; GO:0071756; GO:0032461; GO:0060267; GO:0042803; GO:0006898; GO:0001895; GO:0071751; GO:0071752	Evidence at protein level	SUBCELLULAR LOCATION: Secreted {ECO:0000250|UniProtKB:P01592}.			SIGNAL 1 22 {ECO:0000269|PubMed:25946035}.
P29459	IL12A	GO:0007050; GO:0016477; GO:0071222; GO:0098586; GO:0005737; GO:0050830; GO:0042832; GO:0005576; GO:0005615; GO:0097191; GO:0006955; GO:0042163; GO:0043514; GO:0005143; GO:0045513; GO:0032700; GO:0048662; GO:0051135; GO:0045582; GO:0001916; GO:0042102; GO:0045785; GO:2000510; GO:0032729; GO:0050671; GO:0032946; GO:0032816; GO:0045954; GO:0002860; GO:0034393; GO:0042520; GO:0046982; GO:0010224; GO:…	Evidence at protein level	SUBCELLULAR LOCATION: Secreted.			SIGNAL 1 22 {ECO:0000269|PubMed:2204066}.
P29460	IL12B	GO:0042088; GO:0042093; GO:0007050; GO:0016477; GO:0071346; GO:0071222; GO:0004896; GO:0005737; GO:0050829; GO:0042832; GO:0051607; GO:0005576; GO:0005615; GO:0042802; GO:0042095; GO:0042164; GO:0043514; GO:0005143; GO:0070743; GO:0016020; GO:0030101; GO:0002323; GO:0044130; GO:0002862; GO:0032693; GO:0032700; GO:0048662; GO:0042346; GO:0051135; GO:0051142; GO:0001916; GO:0042102; GO:0002827; GO:…	Evidence at protein level	SUBCELLULAR LOCATION: Secreted.			SIGNAL 1 22 {ECO:0000269|PubMed:2204066}.
O43820	HYAL3	GO:0005975; GO:0051216; GO:0071493; GO:0071347; GO:0071356; GO:0031410; GO:0005576; GO:0030214; GO:0033906; GO:0004415; GO:0006954; GO:0005764; GO:0046677; GO:0009615	Evidence at protein level	SUBCELLULAR LOCATION: Secreted {ECO:0000250}. Lysosome {ECO:0000250}.			SIGNAL 1 20 {ECO:0000255}.
P05013	IFNA6	GO:0030183; GO:0042100; GO:0002286; GO:0002250; GO:0007596; GO:0005125; GO:0019221; GO:0051607; GO:0005576; GO:0005615; GO:0006959; GO:0045087; GO:0002323; GO:0033141; GO:0060338; GO:0043330; GO:0005132; GO:0060337	Evidence at protein level	SUBCELLULAR LOCATION: Secreted.			SIGNAL 1 20 {ECO:0000269|PubMed:15340161}.
Q9P0W0	IFNK	GO:0030183; GO:0042100; GO:0002286; GO:0002250; GO:0005125; GO:0019221; GO:0051607; GO:0005576; GO:0005615; GO:0006959; GO:0030101; GO:0002323; GO:0008285; GO:0045089; GO:0033141; GO:0006355; GO:0043330; GO:0009615; GO:0005132	Evidence at protein level	SUBCELLULAR LOCATION: Secreted.			SIGNAL 1 27 {ECO:0000269|PubMed:15340161}.
Q6UW32	IGFL1	GO:0005615	Evidence at protein level	SUBCELLULAR LOCATION: Secreted {ECO:0000269|PubMed:16890402, ECO:0000269|PubMed:21454693}.			SIGNAL 1 24 {ECO:0000269|PubMed:15340161}.
Q9P0M4	IL17C	GO:0007166; GO:0007267; GO:0005125; GO:0005126; GO:0005576; GO:0005615; GO:0006954	Evidence at protein level	SUBCELLULAR LOCATION: Secreted.			SIGNAL 1 18 {ECO:0000255}.
Q14213	EBI3	GO:0042098; GO:0042088; GO:0004896; GO:0005576; GO:0005615; GO:0006959; GO:0005886; GO:0046641; GO:0045078	Evidence at protein level	SUBCELLULAR LOCATION: Secreted.			SIGNAL 1 20 {ECO:0000255}.
Q8NEV9	IL27	GO:0005576; GO:0005615; GO:0006954; GO:0045087; GO:0045523; GO:0045078; GO:0005102; GO:0042129; GO:0045625; GO:0050688; GO:0009617	Evidence at protein level	SUBCELLULAR LOCATION: Secreted {ECO:0000269|PubMed:12121660}. Note=Does not seem to be secreted without coexpression of EBI3.			SIGNAL 1 28 {ECO:0000255}.
P60568	IL2	GO:0000165; GO:0005088; GO:0030217; GO:0002250; GO:0030246; GO:0007155; GO:0007267; GO:0005125; GO:0005829; GO:0005576; GO:0005615; GO:0097192; GO:0043208; GO:0008083; GO:0006955; GO:0005134; GO:0019209; GO:0030101; GO:0002903; GO:0043066; GO:0045822; GO:0050728; GO:0050672; GO:0001933; GO:0030890; GO:0042104; GO:0030307; GO:0008284; GO:0007204; GO:0060999; GO:0051024; GO:0050729; GO:0032729; GO:…	Evidence at protein level	SUBCELLULAR LOCATION: Secreted.			SIGNAL 1 20 {ECO:0000269|PubMed:6333684}.
Q6ZMJ4	IL34	GO:0005576; GO:0005615; GO:0006954; GO:0045087; GO:0005157; GO:0008284; GO:0045651; GO:0045657; GO:0001934	Evidence at protein level	SUBCELLULAR LOCATION: Secreted {ECO:0000269|PubMed:18467591}.			SIGNAL 1 20 {ECO:0000255}.
P05155	SERPING1	GO:0007568; GO:0008015; GO:0007597; GO:0072562; GO:0006958; GO:0070062; GO:0005576; GO:0005615; GO:0042730; GO:0045087; GO:0001869; GO:0031093; GO:0002576; GO:0004867	Evidence at protein level	SUBCELLULAR LOCATION: Secreted.			SIGNAL 1 22 {ECO:0000269|PubMed:6416294}.
P01566	IFNA10	GO:0030183; GO:0042100; GO:0002286; GO:0002250; GO:0007596; GO:0005125; GO:0019221; GO:0051607; GO:0005576; GO:0005615; GO:0006959; GO:0045087; GO:0002323; GO:0033141; GO:0060338; GO:0043330; GO:0005132; GO:0060337	Evidence at protein level	SUBCELLULAR LOCATION: Secreted.			SIGNAL 1 23 {ECO:0000269|PubMed:9425112}.
P01569	IFNA5	GO:0030183; GO:0042100; GO:0002286; GO:0002250; GO:0007596; GO:0005125; GO:0005126; GO:0019221; GO:0051607; GO:0005576; GO:0005615; GO:0006959; GO:0045087; GO:0002323; GO:0033141; GO:0060338; GO:0043330; GO:0005132; GO:0060337	Evidence at protein level	SUBCELLULAR LOCATION: Secreted.			SIGNAL 1 21 {ECO:0000269|PubMed:15340161}.
P01579	IFNG	GO:0002302; GO:0050852; GO:0002250; GO:0019882; GO:0006915; GO:0007050; GO:0007166; GO:0071351; GO:0071222; GO:0005125; GO:0042742; GO:0042832; GO:0051607; GO:0030968; GO:0009897; GO:0005576; GO:0005615; GO:0097191; GO:0006959; GO:0005133; GO:0060333; GO:0005622; GO:0006928; GO:0030857; GO:0010629; GO:0044130; GO:0032700; GO:0031642; GO:0048662; GO:0000122; GO:0001781; GO:0030593; GO:0032834; GO:…	Evidence at protein level	SUBCELLULAR LOCATION: Secreted.			SIGNAL 1 23 {ECO:0000269|PubMed:3109913, ECO:0000269|PubMed:6427223}.
P20809	IL11	GO:0030183; GO:0007267; GO:0005125; GO:0005737; GO:0005576; GO:0005615; GO:0045444; GO:0008083; GO:0005142; GO:0030219; GO:0046888; GO:0043410; GO:0008284; GO:0033138; GO:0050731; GO:0045944	Evidence at protein level	SUBCELLULAR LOCATION: Secreted {ECO:0000269|PubMed:1828438, ECO:0000269|PubMed:2145578}.			SIGNAL 1 21 {ECO:0000255}.
P35225	IL13	GO:0007267; GO:0071345; GO:0071260; GO:0005125; GO:0005737; GO:0009897; GO:0005576; GO:0005615; GO:0006955; GO:0006954; GO:0005144; GO:0001774; GO:0006928; GO:0033861; GO:1903660; GO:2000352; GO:1901247; GO:1901215; GO:0071635; GO:0030890; GO:0032723; GO:0002639; GO:1901251; GO:0043032; GO:0043306; GO:2000231; GO:0050714; GO:0051281; GO:0048661; GO:0042526; GO:0010155; GO:0045471; GO:0032496; GO:…	Evidence at protein level	SUBCELLULAR LOCATION: Secreted.			SIGNAL 1 24 {ECO:0000255}.
P13232	IL7	GO:0002360; GO:0045453; GO:0007267; GO:0005125; GO:0005576; GO:0005615; GO:0008083; GO:0048873; GO:0006959; GO:0005139; GO:0043066; GO:0043086; GO:2001240; GO:0009887; GO:0030890; GO:0045582; GO:0008284; GO:0046622; GO:0010468	Evidence at protein level	SUBCELLULAR LOCATION: Secreted.			SIGNAL 1 25
P18065	IGFBP2	GO:0007568; GO:0016324; GO:0044267; GO:0032870; GO:0031410; GO:0070062; GO:0005576; GO:0005615; GO:0007565; GO:0031994; GO:0031995; GO:0090090; GO:0042104; GO:0005102; GO:0001558; GO:0043567; GO:0042493; GO:0032355; GO:0051384; GO:0010226; GO:0009612; GO:0007584; GO:0032526; GO:0007165	Evidence at protein level	SUBCELLULAR LOCATION: Secreted.			SIGNAL 1 35
P22692	IGFBP4	GO:0006259; GO:0008283; GO:0044267; GO:0005576; GO:0005615; GO:0006954; GO:0031994; GO:0031995; GO:0090090; GO:0043410; GO:0043568; GO:0005102; GO:0001558; GO:0010906; GO:0043567; GO:0007165; GO:0001501; GO:0044342	Evidence at protein level	SUBCELLULAR LOCATION: Secreted.			SIGNAL 1 21 {ECO:0000269|PubMed:1709161, ECO:0000269|PubMed:1709585, ECO:0000269|PubMed:1726835}.
P24593	IGFBP5	GO:0044267; GO:0071320; GO:0071407; GO:0005576; GO:0007565; GO:0001968; GO:0042593; GO:0006006; GO:0031069; GO:0031994; GO:0031995; GO:0016942; GO:0042567; GO:0005622; GO:0035556; GO:0048286; GO:0060056; GO:0030336; GO:0045926; GO:0043569; GO:1901862; GO:0045668; GO:1904205; GO:0014912; GO:0048662; GO:0017148; GO:0001649; GO:0043568; GO:0051897; GO:0001558; GO:0010906; GO:0060416; GO:0007165; GO:…	Evidence at protein level	SUBCELLULAR LOCATION: Secreted.			SIGNAL 1 20 {ECO:0000255}.
P24592	IGFBP6	GO:0005794; GO:0044267; GO:0070062; GO:0005576; GO:0005615; GO:0031994; GO:0031995; GO:0090090; GO:0008285; GO:0005102; GO:0001558; GO:0043567; GO:0007165	Evidence at protein level	SUBCELLULAR LOCATION: Secreted.			SIGNAL 1 27 {ECO:0000305|PubMed:1697583, ECO:0000305|PubMed:1850257, ECO:0000305|PubMed:2154495}.
P01571	IFNA17	GO:0030183; GO:0042100; GO:0002286; GO:0002250; GO:0007596; GO:0005125; GO:0019221; GO:0051607; GO:0005576; GO:0005615; GO:0006959; GO:0045087; GO:0002323; GO:0033141; GO:0060338; GO:0043330; GO:0009615; GO:0005132; GO:0060337	Evidence at protein level	SUBCELLULAR LOCATION: Secreted.			SIGNAL 1 23 {ECO:0000269|PubMed:1634550, ECO:0000269|PubMed:9425112}.
P05014	IFNA4	GO:0030183; GO:0042100; GO:0002286; GO:0002250; GO:0007596; GO:0005125; GO:0019221; GO:0051607; GO:0005576; GO:0005615; GO:0006959; GO:0045087; GO:0002323; GO:0033141; GO:0060338; GO:0043330; GO:0009615; GO:0005132; GO:0060337	Evidence at protein level	SUBCELLULAR LOCATION: Secreted.			SIGNAL 1 23 {ECO:0000269|PubMed:9425112}.
P05000	IFNW1	GO:0030183; GO:0042100; GO:0002286; GO:0002250; GO:0007050; GO:0005125; GO:0005126; GO:0019221; GO:0051607; GO:0005615; GO:0006959; GO:0045087; GO:0002323; GO:0033141; GO:0043330; GO:0009615; GO:0005132	Evidence at protein level	SUBCELLULAR LOCATION: Secreted.			SIGNAL 1 21 Or 23 in some molecules. {ECO:0000269|PubMed:15340161, ECO:0000269|PubMed:1693148, ECO:0000269|PubMed:7765487}.
P27352	CBLIF	GO:0016324; GO:0031419; GO:0009235; GO:0015889; GO:0006824; GO:0005768; GO:0005576; GO:0005615; GO:0043202; GO:0005902	Evidence at protein level	SUBCELLULAR LOCATION: Secreted.			SIGNAL 1 18 {ECO:0000255}.
P40933	IL15	GO:0005794; GO:0001866; GO:0007568; GO:0048469; GO:0009986; GO:0007267; GO:0071305; GO:0005125; GO:0005737; GO:0005768; GO:0005576; GO:0005615; GO:0045062; GO:0030212; GO:0006955; GO:0006954; GO:0005887; GO:0048535; GO:0016020; GO:0001779; GO:0048662; GO:0005654; GO:0042102; GO:0008284; GO:0050778; GO:0050729; GO:0032740; GO:0032825; GO:0032819; GO:1904100; GO:0034105; GO:0042517; GO:0045580; GO:…	Evidence at protein level	SUBCELLULAR LOCATION: Isoform IL15-S48AA: Secreted.; SUBCELLULAR LOCATION: Isoform IL15-S21AA: Cytoplasm. Nucleus. Note=IL15-S21AA is not secreted, but rather is stored intracellularly, appearing in the nucleus and cytoplasmic components.			SIGNAL 1 29 {ECO:0000255}.
Q9GZX6	IL22	GO:0006953; GO:0007267; GO:0005125; GO:0005576; GO:0005615; GO:0006955; GO:0006954; GO:0045518; GO:0046427; GO:0051384	Evidence at protein level	SUBCELLULAR LOCATION: Secreted.			SIGNAL 1 33 {ECO:0000269|PubMed:15340161}.
Q9NPF7	IL23A	GO:0042098; GO:0050829; GO:0051607; GO:0005576; GO:0006954; GO:0045087; GO:0070743; GO:0032693; GO:0042346; GO:0051135; GO:0051142; GO:0001916; GO:0042102; GO:0002827; GO:2000330; GO:2000318; GO:0042104; GO:0010535; GO:0002230; GO:0032725; GO:0050729; GO:0032729; GO:0032733; GO:0032735; GO:0032740; GO:0043382; GO:0032816; GO:0032819; GO:0090023; GO:0045672; GO:0034105; GO:0045944; GO:0032760; GO:…	Evidence at protein level	SUBCELLULAR LOCATION: Secreted {ECO:0000269|PubMed:11114383}. Note=Secreted upon association with IL12B.			SIGNAL 1 19 {ECO:0000255}.
P10997	IAPP	GO:0006915; GO:0007267; GO:0044267; GO:0042755; GO:0005576; GO:0005615; GO:0042802; GO:0045779; GO:0045596; GO:0043025; GO:0005102; GO:0019233; GO:0007165	Evidence at protein level	SUBCELLULAR LOCATION: Secreted {ECO:0000269|PubMed:17374526}.			SIGNAL 1 22 {ECO:0000255}.
Q6UXB1	IGFL3	GO:0005576	Evidence at protein level	SUBCELLULAR LOCATION: Secreted {ECO:0000305}.			SIGNAL 1 24 {ECO:0000269|PubMed:15340161}.
Q14623	IHH	GO:0005509; GO:0051216; GO:0007267; GO:0042733; GO:0005615; GO:0001947; GO:0016539; GO:0060135; GO:0033085; GO:0046639; GO:0043066; GO:0033088; GO:0009968; GO:0005113; GO:0008233; GO:0005886; GO:0033089; GO:0046638; GO:0032332; GO:0050679; GO:0045880; GO:0045944; GO:0032355; GO:0001501; GO:0007224; GO:0061053	Evidence at protein level	SUBCELLULAR LOCATION: Indian hedgehog protein N-product: Cell membrane {ECO:0000250}; Lipid-anchor {ECO:0000250}; Extracellular side {ECO:0000250}. Note=The N-terminal peptide remains associated with the cell surface. {ECO:0000250}.; SUBCELLULAR LOCATION: Indian hedgehog protein C-product: Secreted, extracellular space {ECO:0000250}. Note=The C-terminal peptide diffuses from the cell. {ECO:000025…			SIGNAL 1 27 {ECO:0000305}.
Q96PD4	IL17F	GO:0051216; GO:0005125; GO:0019955; GO:0042089; GO:0005126; GO:0005576; GO:0005615; GO:0006954; GO:0042109; GO:0016525; GO:1900017; GO:2000778; GO:0045944; GO:0042803; GO:0045423; GO:0045076; GO:0045408; GO:0045414; GO:0017015	Evidence at protein level	SUBCELLULAR LOCATION: Secreted.			SIGNAL 1 30 {ECO:0000269|PubMed:15340161}.
Q9H293	IL25	GO:0007166; GO:0005125; GO:0030222; GO:0005576; GO:0005615; GO:0006954; GO:0002437; GO:0032616; GO:0030380; GO:0032634; GO:0045944; GO:0009620; GO:0009624	Evidence at protein level	SUBCELLULAR LOCATION: Secreted.			SIGNAL 1 32 {ECO:0000269|PubMed:15340161}.
P58166	INHBE	GO:0060395; GO:0048468; GO:0005125; GO:0005615; GO:0010862; GO:0043408; GO:0042981; GO:0005160	Evidence at protein level	SUBCELLULAR LOCATION: Secreted {ECO:0000250}.			SIGNAL 1 19 {ECO:0000255}.
P05154	SERPINA5	GO:0032190; GO:0002080; GO:0007596; GO:0009897; GO:0070062; GO:0005576; GO:0005615; GO:0007342; GO:0005539; GO:0008201; GO:0006869; GO:0016020; GO:0051346; GO:0031210; GO:0031091; GO:0031094; GO:0002020; GO:0036029; GO:0036026; GO:0036027; GO:0036025; GO:0036024; GO:0097181; GO:0097183; GO:0097182; GO:0036030; GO:0036028; GO:0043234; GO:0001972; GO:0004867; GO:0007283	Evidence at protein level	SUBCELLULAR LOCATION: Secreted, extracellular space {ECO:0000269|PubMed:1725227, ECO:0000269|PubMed:18467335, ECO:0000269|PubMed:7521127, ECO:0000269|PubMed:8536714, ECO:0000269|PubMed:9510955, ECO:0000269|PubMed:9556620}. Note=Localized on the plasma membrane overlying the acrosomal head of spermatozoa of ependymal spermatozoa and ejaculated sperm. Localized at the equatorial segment of acrosome…			SIGNAL 1 19 {ECO:0000269|PubMed:2556811}.
Q8IZI9	IFNL3	GO:0007259; GO:0051607; GO:0005576; GO:0005615; GO:0045087; GO:0005622; GO:0045071; GO:0050778; GO:1903955; GO:0005102; GO:0050863	Evidence at protein level	SUBCELLULAR LOCATION: Secreted {ECO:0000269|PubMed:12483210}.			SIGNAL 1 21 {ECO:0000255}.
P18510	IL1RN	GO:0006953; GO:0005125; GO:0005737; GO:0070062; GO:0005615; GO:0006955; GO:0030073; GO:0045352; GO:0045353; GO:0005152; GO:0005149; GO:0005150; GO:0005151; GO:0005622; GO:0006629; GO:0034115; GO:2000660; GO:0005886; GO:0051384	Evidence at protein level	SUBCELLULAR LOCATION: Isoform 1: Secreted.; SUBCELLULAR LOCATION: Isoform 2: Cytoplasm.; SUBCELLULAR LOCATION: Isoform 3: Cytoplasm.; SUBCELLULAR LOCATION: Isoform 4: Cytoplasm.			SIGNAL 1 25 {ECO:0000269|PubMed:2137200, ECO:0000269|PubMed:2143761}.
Q9HBE4	IL21	GO:0048469; GO:0005126; GO:0005615; GO:0006955; GO:0005134; GO:0005622; GO:0030890; GO:0042102; GO:0008284; GO:0001819; GO:0050729; GO:0045078; GO:0032740; GO:0045954; GO:0034105; GO:0042511; GO:0042517; GO:0007165; GO:0042503	Evidence at protein level	SUBCELLULAR LOCATION: Secreted {ECO:0000269|PubMed:11081504}.			SIGNAL 1 22 {ECO:0000255}.
Q13007	IL24	GO:0006915; GO:0071353; GO:0071222; GO:0005125; GO:0005576; GO:0005615; GO:0006955; GO:0006954; GO:0030336; GO:0008285; GO:0046427; GO:0008284; GO:0042517; GO:0033136; GO:0042060	Evidence at protein level	SUBCELLULAR LOCATION: Secreted {ECO:0000305}.			SIGNAL 1 51 {ECO:0000269|PubMed:15340161}.
P08700	IL3	GO:0000165; GO:0005088; GO:0007267; GO:0005125; GO:0019221; GO:0035162; GO:0005576; GO:0005615; GO:0006955; GO:0005135; GO:0005622; GO:0007399; GO:0045740; GO:0008284; GO:0070668; GO:0002763; GO:0050731; GO:0042523; GO:0004713	Evidence at protein level	SUBCELLULAR LOCATION: Secreted.			SIGNAL 1 19
P09529	INHBB	GO:0060395; GO:0032924; GO:0048468; GO:0030154; GO:0071944; GO:0032869; GO:0044320; GO:0009267; GO:0005125; GO:0006952; GO:0005576; GO:0005615; GO:0045444; GO:0040007; GO:0005179; GO:0046789; GO:0046882; GO:0048178; GO:0046676; GO:0048599; GO:0001541; GO:0048471; GO:2001235; GO:0046881; GO:0060279; GO:0010862; GO:0042803; GO:0043408; GO:0042981; GO:0009612; GO:0005160	Evidence at protein level	SUBCELLULAR LOCATION: Secreted.			SIGNAL 1 28 {ECO:0000255}.
P51460	INSL3	GO:0007193; GO:0007267; GO:0005576; GO:0005615; GO:0005158; GO:0008584; GO:0043066; GO:0008285; GO:0001556; GO:0048471; GO:0030819; GO:0008284; GO:0010634; GO:0090303; GO:0002020; GO:0005102; GO:0007283	Evidence at protein level	SUBCELLULAR LOCATION: Secreted.			SIGNAL 1 20 {ECO:0000269|PubMed:15340161}.
P01308	INS	GO:0006888; GO:0007186; GO:0005796; GO:0000139; GO:0000165; GO:0032148; GO:0006953; GO:0046631; GO:0007267; GO:0044267; GO:0005788; GO:0033116; GO:0031904; GO:0005576; GO:0005615; GO:0055089; GO:0042593; GO:0006006; GO:0015758; GO:0005179; GO:0042802; GO:0005158; GO:0008286; GO:0005159; GO:0033861; GO:0002674; GO:0045922; GO:2000252; GO:0045721; GO:0045818; GO:0050995; GO:1902176; GO:0042177; GO:…	Evidence at protein level	SUBCELLULAR LOCATION: Secreted.			SIGNAL 1 24 {ECO:0000269|PubMed:14426955}.
Q9NQ38	SPINK5	GO:0042640; GO:0005938; GO:0005737; GO:0005829; GO:0005783; GO:0005789; GO:0009913; GO:0097209; GO:0030855; GO:0070062; GO:0030198; GO:0005576; GO:0035315; GO:0016525; GO:0002787; GO:0050777; GO:1900004; GO:0048471; GO:0045580; GO:0004867	Evidence at protein level	SUBCELLULAR LOCATION: Secreted.			SIGNAL 1 22 {ECO:0000255}.
P01567	IFNA7	GO:0030183; GO:0042100; GO:0002286; GO:0002250; GO:0007596; GO:0007267; GO:0005125; GO:0019221; GO:0051607; GO:0005576; GO:0005615; GO:0006959; GO:0045087; GO:0002323; GO:0033141; GO:0060338; GO:0043330; GO:0009615; GO:0005132; GO:0060337	Evidence at protein level	SUBCELLULAR LOCATION: Secreted.			SIGNAL 1 23 {ECO:0000269|PubMed:9425112}.
P05019	IGF1	GO:0006260; GO:0070371; GO:0007265; GO:0000187; GO:0032148; GO:0007568; GO:0035867; GO:0035630; GO:0001775; GO:0008283; GO:0044267; GO:0071257; GO:0071392; GO:0032869; GO:0050974; GO:0070382; GO:0005576; GO:0005615; GO:0007565; GO:0009441; GO:0005179; GO:0005158; GO:0016942; GO:0005159; GO:0048009; GO:0042567; GO:0005178; GO:0005614; GO:0007613; GO:0006928; GO:0014896; GO:0007517; GO:0045445; GO:…	Evidence at protein level	SUBCELLULAR LOCATION: Secreted {ECO:0000250|UniProtKB:P05017}.			SIGNAL 1 21 {ECO:0000255}.
Q16552	IL17A	GO:0006915; GO:0008219; GO:0007166; GO:0007267; GO:0071385; GO:0071347; GO:0005125; GO:0005126; GO:0005737; GO:0050832; GO:0009897; GO:0005576; GO:0005615; GO:0072537; GO:0006955; GO:0006954; GO:1900017; GO:0032747; GO:2000778; GO:0010940; GO:0045672; GO:0045944; GO:0043200	Evidence at protein level	SUBCELLULAR LOCATION: Secreted.			SIGNAL 1 23 {ECO:0000269|PubMed:15340161}.
Q9NYY1	IL20	GO:0005125; GO:0005576; GO:0005615; GO:0006955; GO:0045517; GO:0045518; GO:0045606; GO:0045618; GO:0045672; GO:0042517; GO:0050727	Evidence at protein level	SUBCELLULAR LOCATION: Secreted.			SIGNAL 1 24 {ECO:0000269|PubMed:15340161}.
P24001	IL32	GO:0007155; GO:0005829; GO:0006952; GO:0005615; GO:0006955; GO:0016020	Evidence at protein level	SUBCELLULAR LOCATION: Secreted {ECO:0000269|PubMed:15664165}.			SIGNAL 1 30 {ECO:0000255}.
P05113	IL5	GO:0000165; GO:0005088; GO:0005125; GO:0019221; GO:0005576; GO:0005615; GO:0006955; GO:0006954; GO:0005137; GO:0005622; GO:0030890; GO:0046427; GO:0045645; GO:0051024; GO:0050731; GO:0071803; GO:0051091; GO:0004713	Evidence at protein level	SUBCELLULAR LOCATION: Secreted.			SIGNAL 1 19 {ECO:0000269|PubMed:2361960}.
Q17R60	IMPG1	GO:0005201; GO:0005578; GO:0007601	Evidence at protein level	SUBCELLULAR LOCATION: Secreted {ECO:0000305}.			SIGNAL 1 20 {ECO:0000255}.
Q14641	INSL4	GO:0008283; GO:0007267; GO:0005615; GO:0007565; GO:0005159; GO:0007275; GO:0005102; GO:0007165	Evidence at protein level	SUBCELLULAR LOCATION: Secreted {ECO:0000250}.			SIGNAL 1 25 {ECO:0000269|PubMed:15340161}.
P19823	ITIH2	GO:0072562; GO:0004866; GO:0070062; GO:0005576; GO:0030212; GO:0004867	Evidence at protein level	SUBCELLULAR LOCATION: Secreted.			SIGNAL 1 18 {ECO:0000255}.
P22301	IL10	GO:0030183; GO:0042100; GO:0007568; GO:0060670; GO:0007267; GO:0071392; GO:0035729; GO:0071222; GO:0005125; GO:0005737; GO:0007253; GO:0042742; GO:0042832; GO:0005615; GO:0008083; GO:0030097; GO:0006954; GO:0005141; GO:0030595; GO:0030889; GO:0045347; GO:0042130; GO:0043066; GO:0071650; GO:0002875; GO:0060302; GO:0002740; GO:0044130; GO:0045355; GO:0032689; GO:0032692; GO:0032695; GO:0032701; GO:…	Evidence at protein level	SUBCELLULAR LOCATION: Secreted.			SIGNAL 1 18 {ECO:0000269|PubMed:15340161}.
Q9UHD0	IL19	GO:0006915; GO:0005125; GO:0005576; GO:0005615; GO:0006955; GO:0006954; GO:0042226; GO:2001237; GO:0046427; GO:2001244; GO:0072593; GO:0007165	Evidence at protein level	SUBCELLULAR LOCATION: Secreted.			SIGNAL 1 24 {ECO:0000269|PubMed:15340161}.
Q9NPH9	IL26	GO:0007267; GO:0005125; GO:0005829; GO:0005615; GO:0006955; GO:0006954; GO:0050680; GO:0070374; GO:0046427; GO:0050715; GO:0051897; GO:0032874; GO:0045944	Evidence at protein level	SUBCELLULAR LOCATION: Secreted {ECO:0000269|PubMed:18483078}.			SIGNAL 1 21 {ECO:0000255}.
P05112	IL4	GO:0031296; GO:0030183; GO:0002296; GO:0035745; GO:0045064; GO:0006968; GO:0071288; GO:0006935; GO:0008203; GO:0045189; GO:0005125; GO:0042832; GO:0097028; GO:0009897; GO:0005615; GO:0097192; GO:0007565; GO:0008083; GO:0006955; GO:0002227; GO:0005136; GO:0001774; GO:0043011; GO:2000320; GO:0002674; GO:0043066; GO:0002677; GO:1903660; GO:2000352; GO:0010633; GO:2001237; GO:0043031; GO:0045019; GO:…	Evidence at protein level	SUBCELLULAR LOCATION: Secreted.			SIGNAL 1 24
P05231	IL6	GO:0072540; GO:0006953; GO:0007568; GO:0046849; GO:0060445; GO:0016049; GO:0045454; GO:0071549; GO:0035729; GO:0070301; GO:0071347; GO:0071222; GO:0071356; GO:0005125; GO:0019221; GO:0005737; GO:0050829; GO:0050830; GO:0042832; GO:0051607; GO:0031018; GO:0060664; GO:0009897; GO:0005576; GO:0005615; GO:0070091; GO:0042593; GO:0008083; GO:0002384; GO:0006959; GO:0006954; GO:0005138; GO:0005896; GO:…	Evidence at protein level	SUBCELLULAR LOCATION: Secreted.			SIGNAL 1 29 {ECO:0000269|PubMed:1883960, ECO:0000269|PubMed:2610854, ECO:0000269|PubMed:3279116}.
P05111	INHA	GO:0060395; GO:0007050; GO:0048468; GO:0030154; GO:0007166; GO:0007267; GO:0005125; GO:0005737; GO:0030218; GO:0005576; GO:0008083; GO:0042541; GO:0005179; GO:0043512; GO:0043513; GO:0034673; GO:0008584; GO:0045578; GO:0045786; GO:0046882; GO:0045077; GO:0045650; GO:0042326; GO:0007399; GO:0043025; GO:0001541; GO:0001917; GO:0001750; GO:0046881; GO:0010862; GO:0005102; GO:0043408; GO:0042981; GO:…	Evidence at protein level	SUBCELLULAR LOCATION: Secreted.			SIGNAL 1 18
Q06033	ITIH3	GO:0004866; GO:0070062; GO:0005576; GO:0030212; GO:0002576; GO:0031089; GO:0004867	Evidence at protein level	SUBCELLULAR LOCATION: Secreted.			SIGNAL 1 20 {ECO:0000255}.
P10145	CXCL8	GO:0007186; GO:0036499; GO:0001525; GO:0019722; GO:0007050; GO:0044344; GO:0071347; GO:0071222; GO:0071356; GO:0008009; GO:0070098; GO:0006935; GO:0048566; GO:0005576; GO:0005615; GO:0006955; GO:0050930; GO:0006954; GO:0005153; GO:0005622; GO:0035556; GO:0006928; GO:0045744; GO:0008285; GO:0042119; GO:0030593; GO:0045766; GO:0090023; GO:0031623; GO:0030155; GO:0045091; GO:0034976; GO:0002237; GO:…	Evidence at protein level	SUBCELLULAR LOCATION: Secreted.			SIGNAL 1 20 {ECO:0000269|PubMed:2145175, ECO:0000269|PubMed:2523801, ECO:0000269|PubMed:2648135}.
P08476	INHBA	GO:0000082; GO:0097154; GO:0060395; GO:0043509; GO:0032924; GO:0007050; GO:0048468; GO:0030154; GO:0007166; GO:0007267; GO:0071397; GO:0071372; GO:0005125; GO:0006952; GO:0035987; GO:0030218; GO:0005576; GO:0097191; GO:0061029; GO:0040007; GO:0008083; GO:0001942; GO:0002244; GO:0042541; GO:0005179; GO:0042802; GO:0043512; GO:0008584; GO:0048333; GO:0045578; GO:0045786; GO:0030308; GO:0008285; GO:…	Evidence at protein level	SUBCELLULAR LOCATION: Secreted.			SIGNAL 1 20 {ECO:0000250}.
P20155	SPINK2	GO:0001669; GO:0004866; GO:0005615; GO:1900004; GO:0060046; GO:0004867	Evidence at protein level	SUBCELLULAR LOCATION: Secreted.			SIGNAL 1 23 {ECO:0000269|PubMed:2226783}.
Q6UWN8	SPINK6	GO:0005576; GO:1900004; GO:0004867	Evidence at protein level	SUBCELLULAR LOCATION: Secreted {ECO:0000250|UniProtKB:Q8BT20}.			SIGNAL 1 23 {ECO:0000269|PubMed:15340161}.
P29622	SERPINA4	GO:0070062; GO:0005576; GO:0005615; GO:0002576; GO:0031089; GO:0004867	Evidence at protein level	SUBCELLULAR LOCATION: Secreted.			SIGNAL 1 20 {ECO:0000255}.
Q14624	ITIH4	GO:0006953; GO:0072562; GO:0004866; GO:0070062; GO:0005576; GO:0030212; GO:0005886; GO:0002576; GO:0031089; GO:0034097; GO:0004867	Evidence at protein level	SUBCELLULAR LOCATION: Secreted.			SIGNAL 1 28 {ECO:0000269|PubMed:7541790}.
Q9Y5Q6	INSL5	GO:0001664; GO:0005576; GO:0005179; GO:2000253	Evidence at protein level	SUBCELLULAR LOCATION: Secreted.			SIGNAL 1 22 {ECO:0000269|PubMed:15340161}.
Q5DT21	SPINK9	GO:0005576; GO:1900004; GO:0004867	Evidence at protein level	SUBCELLULAR LOCATION: Secreted {ECO:0000305}.			SIGNAL 1 19 {ECO:0000269|PubMed:19194479}.
P19827	ITIH1	GO:0072562; GO:0005509; GO:0070062; GO:0005576; GO:0030212; GO:0004867	Evidence at protein level	SUBCELLULAR LOCATION: Secreted.			SIGNAL 1 27 {ECO:0000255}.
P00995	SPINK1	GO:0001669; GO:0004866; GO:0070062; GO:0005615; GO:0090281; GO:0010751; GO:0050732; GO:1900004; GO:0060046; GO:2001256; GO:0004867	Evidence at protein level	SUBCELLULAR LOCATION: Secreted {ECO:0000269|PubMed:7142173}.			SIGNAL 1 23 {ECO:0000269|PubMed:7142173, ECO:0000269|PubMed:843082}.
P58062	SPINK7	GO:0005576; GO:1900004; GO:0004867	Evidence at protein level	SUBCELLULAR LOCATION: Secreted {ECO:0000305}.			SIGNAL 1 19 {ECO:0000255}.
P23352	ANOS1	GO:0007411; GO:0007155; GO:0006935; GO:0005201; GO:0005576; GO:0005615; GO:0008543; GO:0008201; GO:0006928; GO:0005886; GO:0005578; GO:0004867	Evidence at protein level	SUBCELLULAR LOCATION: Cell membrane {ECO:0000269|PubMed:8842728}; Peripheral membrane protein {ECO:0000269|PubMed:8842728}. Secreted {ECO:0000269|PubMed:8842728}. Note=Proteolytic cleavage may release it from the cell surface into the extracellular space.			SIGNAL 1 24 {ECO:0000255}.
P07288	KLK3	GO:0002778; GO:0044267; GO:0004175; GO:0070062; GO:0005576; GO:0005615; GO:0016811; GO:0016525; GO:0005634; GO:0043234; GO:0006508; GO:0004252; GO:0008236	Evidence at protein level	SUBCELLULAR LOCATION: Secreted.			SIGNAL 1 17 {ECO:0000269|PubMed:15340161}.
Q92876	KLK6	GO:0042982; GO:0007417; GO:0030574; GO:0005737; GO:0005783; GO:0005576; GO:0005615; GO:0042445; GO:0045171; GO:0015630; GO:0005739; GO:0042552; GO:0070997; GO:0031965; GO:0005730; GO:0005654; GO:0045745; GO:0016540; GO:0016485; GO:0045595; GO:0010975; GO:0009611; GO:0004252; GO:0042246	Evidence at protein level	SUBCELLULAR LOCATION: Secreted. Nucleus, nucleolus. Cytoplasm. Mitochondrion. Microsome. Note=In brain, detected in the nucleus of glial cells and in the nucleus and cytoplasm of neurons. Detected in the mitochondrial and microsomal fractions of HEK-293 cells and released into the cytoplasm following cell stress.			SIGNAL 1 16 {ECO:0000255}.
Q15726	KISS1	GO:0016324; GO:0007010; GO:0005829; GO:0005576; GO:0005615; GO:0060112; GO:0008285; GO:0043005; GO:0043025; GO:0043410; GO:0051482; GO:0060124; GO:0033686; GO:0050806	Evidence at protein level	SUBCELLULAR LOCATION: Secreted.			SIGNAL 1 19 {ECO:0000255}.
O43240	KLK10	GO:0007049; GO:0005576; GO:0004252; GO:0008236	Evidence at protein level	SUBCELLULAR LOCATION: Secreted {ECO:0000305}.			SIGNAL 1 30 {ECO:0000255}.
Q9UBX7	KLK11	GO:0005794; GO:0070062; GO:0005615; GO:0004252; GO:0008236	Evidence at protein level	SUBCELLULAR LOCATION: Isoform 1: Secreted.; SUBCELLULAR LOCATION: Isoform 2: Golgi apparatus.			SIGNAL 1 50 {ECO:0000255}.
Q9Y5K2	KLK4	GO:0097186; GO:0031214; GO:0005576; GO:0046872; GO:0006508; GO:0004252; GO:0008236	Evidence at protein level	SUBCELLULAR LOCATION: Secreted.			SIGNAL 1 26 {ECO:0000255}.
Q9Y337	KLK5	GO:0097209; GO:0008544; GO:0005615; GO:0008233; GO:0045745; GO:0002803; GO:0004252; GO:0008236	Evidence at protein level	SUBCELLULAR LOCATION: Secreted.			SIGNAL 1 22 {ECO:0000255}.
Q14667	KIAA0100	GO:0005576	Evidence at protein level	SUBCELLULAR LOCATION: Secreted {ECO:0000305}.			SIGNAL 1 31 {ECO:0000255}.
Q9P0G3	KLK14	GO:0048730; GO:0070062; GO:0005615; GO:0009566; GO:0045744; GO:0045745; GO:0006508; GO:0070684; GO:0004252	Evidence at protein level	SUBCELLULAR LOCATION: Secreted, extracellular space {ECO:0000269|PubMed:15654974, ECO:0000269|PubMed:16456535, ECO:0000269|PubMed:17110383}.			SIGNAL 1 34
P49862	KLK7	GO:0097209; GO:0008544; GO:0022617; GO:0005576; GO:0005615; GO:0004222; GO:0008233; GO:0002803; GO:0004252; GO:0008236	Evidence at protein level	SUBCELLULAR LOCATION: Secreted {ECO:0000269|PubMed:12738725}. Note=In ovarian carcinoma, secreted and also observed at the apical membrane and in cytoplasm at the invasive front.			SIGNAL 1 22 {ECO:0000269|PubMed:8034709}.
P03952	KLKB1	GO:0002542; GO:0007597; GO:0070062; GO:0022617; GO:0005576; GO:0005615; GO:0042730; GO:0097421; GO:0005886; GO:0031639; GO:0051919; GO:0006508; GO:0004252; GO:0031638	Evidence at protein level	SUBCELLULAR LOCATION: Secreted.			SIGNAL 1 19
P01042	KNG1	GO:0007597; GO:0072562; GO:0004869; GO:0070062; GO:0005576; GO:0005615; GO:0008201; GO:0006954; GO:0030195; GO:0007162; GO:0045861; GO:0005886; GO:0031093; GO:0002576; GO:0043065; GO:0007204; GO:0035815; GO:0035810; GO:0005102; GO:0006939; GO:0042311; GO:0008270	Evidence at protein level	SUBCELLULAR LOCATION: Secreted, extracellular space.			SIGNAL 1 18 {ECO:0000269|PubMed:2989293, ECO:0000269|PubMed:3484703}.
Q6UWW0	LCN15	GO:0005576; GO:0006629; GO:0036094; GO:0005215	Evidence at protein level	SUBCELLULAR LOCATION: Secreted {ECO:0000305}.			SIGNAL 1 20 {ECO:0000255}.
O60938	KERA	GO:0005796; GO:0061303; GO:0005576; GO:0005615; GO:0018146; GO:0042340; GO:0043202; GO:0005578; GO:0050896; GO:0007601	Evidence at protein level	SUBCELLULAR LOCATION: Secreted, extracellular space, extracellular matrix {ECO:0000250}.			SIGNAL 1 20 {ECO:0000255}.
Q6ISS4	LAIR2	GO:0005576; GO:0050776	Evidence at protein level	SUBCELLULAR LOCATION: Secreted.			SIGNAL 1 21 {ECO:0000255}.
Q9UKR0	KLK12	GO:0070062; GO:0005615; GO:0008233; GO:0006508; GO:0004252; GO:0008236	Evidence at protein level	SUBCELLULAR LOCATION: Secreted.			SIGNAL 1 17 {ECO:0000255}.
O60259	KLK8	GO:0008219; GO:0005737; GO:0005615; GO:0043616; GO:0007613; GO:0048681; GO:0031642; GO:0048812; GO:0050807; GO:0009611; GO:0004252; GO:0050808	Evidence at protein level	SUBCELLULAR LOCATION: Secreted {ECO:0000269|PubMed:17761692}. Cytoplasm {ECO:0000269|PubMed:17761692}. Note=Shows a cytoplasmic distribution in the keratinocytes.			SIGNAL 1 28 {ECO:0000255}.
Q9Y6N6	LAMC3	GO:0014002; GO:0005604; GO:0007155; GO:0000904; GO:0030198; GO:0005576; GO:0016020; GO:0005578; GO:0060041; GO:0005198; GO:0007601	Evidence at protein level	SUBCELLULAR LOCATION: Secreted, extracellular space, extracellular matrix, basement membrane.			SIGNAL 1 19 {ECO:0000255}.
P04180	LCAT	GO:0034186; GO:0034435; GO:0042632; GO:0008203; GO:0030301; GO:0070062; GO:0005576; GO:0005615; GO:0034364; GO:0034375; GO:0042158; GO:0042157; GO:0006656; GO:0046470; GO:0004607; GO:0004623; GO:0006644; GO:0090107; GO:0046688; GO:0051384; GO:0043691; GO:0034372	Evidence at protein level	SUBCELLULAR LOCATION: Secreted {ECO:0000269|PubMed:10222237, ECO:0000269|PubMed:19065001, ECO:0000269|PubMed:3458198, ECO:0000269|PubMed:8820107}. Note=Secreted into blood plasma (PubMed:3458198, PubMed:8820107, PubMed:10222237). Produced in astrocytes and secreted into cerebral spinal fluid (CSF). {ECO:0000269|PubMed:10222237, ECO:0000269|PubMed:3458198, ECO:0000269|PubMed:8820107}.			SIGNAL 1 24 {ECO:0000269|PubMed:3458198}.
Q9H2R5	KLK15	GO:0005576; GO:0004252; GO:0008236	Evidence at protein level	SUBCELLULAR LOCATION: Secreted {ECO:0000305}.			SIGNAL 1 16 {ECO:0000255}.
P25391	LAMA1	GO:0005604; GO:0007155; GO:0007166; GO:0031012; GO:0030198; GO:0005201; GO:0005576; GO:0005615; GO:0005606; GO:0005608; GO:0005578; GO:0030155; GO:0030334; GO:0045995	Evidence at protein level	SUBCELLULAR LOCATION: Secreted, extracellular space, extracellular matrix, basement membrane. Note=Major component.			SIGNAL 1 17 {ECO:0000255}.
Q16787	LAMA3	GO:0005604; GO:0007155; GO:0035987; GO:0008544; GO:0070062; GO:0022617; GO:0030198; GO:0005576; GO:0031581; GO:0005610; GO:0030155; GO:0030334; GO:0045995; GO:0005198	Evidence at protein level	SUBCELLULAR LOCATION: Secreted, extracellular space, extracellular matrix, basement membrane. Note=Major component.			SIGNAL 1 35 {ECO:0000255}.
Q16363	LAMA4	GO:0005605; GO:0005604; GO:0007155; GO:0070062; GO:0030198; GO:0005201; GO:0005576; GO:0030155; GO:0030334; GO:0045995	Evidence at protein level	SUBCELLULAR LOCATION: Secreted, extracellular space, extracellular matrix, basement membrane. Note=Major component.			SIGNAL 1 24 {ECO:0000255}.
P60985	KRTDAP	GO:0030154; GO:0005576	Evidence at protein level	SUBCELLULAR LOCATION: Secreted {ECO:0000269|PubMed:15140226}.			SIGNAL 1 22 {ECO:0000255}.
Q13751	LAMB3	GO:0050873; GO:0007155; GO:0035987; GO:0008544; GO:0022617; GO:0030198; GO:0005576; GO:0031581; GO:0005610; GO:0005198	Evidence at protein level	SUBCELLULAR LOCATION: Secreted, extracellular space, extracellular matrix, basement membrane.			SIGNAL 1 17 {ECO:0000255}.
Q13753	LAMC2	GO:0007155; GO:0005938; GO:0008544; GO:0022617; GO:0030198; GO:0005576; GO:0005615; GO:0031581; GO:0008201; GO:0005607; GO:0016020; GO:0048471	Evidence at protein level	SUBCELLULAR LOCATION: Secreted, extracellular space, extracellular matrix, basement membrane. Note=Major component.			SIGNAL 1 21 {ECO:0000255}.
Q8IYD9	LAS2	GO:0005576	Evidence at protein level	SUBCELLULAR LOCATION: Secreted {ECO:0000305}.			SIGNAL 1 31 {ECO:0000255}.
Q9Y5X9	LIPG	GO:0005794; GO:0008283; GO:0009986; GO:0042632; GO:0005769; GO:0005576; GO:0005615; GO:0008201; GO:0034375; GO:0044241; GO:0006629; GO:0004465; GO:0008970; GO:0004620; GO:0009395; GO:0055091; GO:0032376; GO:0010983; GO:0050746; GO:0007584; GO:0043691	Evidence at protein level	SUBCELLULAR LOCATION: Secreted.			SIGNAL 1 20 {ECO:0000255}.
P00709	LALBA	GO:0005796; GO:0000139; GO:0006915; GO:0005509; GO:0007267; GO:0042742; GO:0005615; GO:0005989; GO:0004461; GO:0007165	Evidence at protein level	SUBCELLULAR LOCATION: Secreted.			SIGNAL 1 19 {ECO:0000269|PubMed:5049057}.
P24043	LAMA2	GO:0007411; GO:0005605; GO:0005604; GO:0007155; GO:0043197; GO:0070062; GO:0030198; GO:0005576; GO:0007517; GO:0022011; GO:0032224; GO:0030155; GO:0030334; GO:0045995; GO:0042383; GO:0005198	Evidence at protein level	SUBCELLULAR LOCATION: Secreted, extracellular space, extracellular matrix, basement membrane. Note=Major component.			SIGNAL 1 22 {ECO:0000255}.
P07942	LAMB1	GO:0005604; GO:0007155; GO:0035987; GO:0070062; GO:0031012; GO:0030198; GO:0005201; GO:0005576; GO:0005615; GO:0005606; GO:0043259; GO:0005607; GO:0043257; GO:0031175; GO:0021812; GO:0042476; GO:0048471; GO:0030335; GO:0050679; GO:0005198; GO:0034446	Evidence at protein level	SUBCELLULAR LOCATION: Secreted, extracellular space, extracellular matrix, basement membrane. Note=Major component.			SIGNAL 1 21
P11047	LAMC1	GO:0005604; GO:0007155; GO:0016477; GO:0007492; GO:0070062; GO:0031012; GO:0022617; GO:0030198; GO:0005201; GO:0005576; GO:0005615; GO:0031581; GO:0005606; GO:0043259; GO:0043260; GO:0050679; GO:0006461; GO:0034446	Evidence at protein level	SUBCELLULAR LOCATION: Secreted, extracellular space, extracellular matrix, basement membrane.			SIGNAL 1 33
P31025	LCN1	GO:0004869; GO:0070062; GO:0005576; GO:0005615; GO:0015909; GO:0006508; GO:0050896; GO:0001895; GO:0050909	Evidence at protein level	SUBCELLULAR LOCATION: Secreted.			SIGNAL 1 18 {ECO:0000269|PubMed:25946035, ECO:0000269|Ref.8}.
Q969E1	LEAP2	GO:0042742; GO:0005576	Evidence at protein level	SUBCELLULAR LOCATION: Secreted.			SIGNAL 1 22 {ECO:0000255}.
Q9GZZ8	LACRT	GO:0033173; GO:0019722; GO:0005518; GO:0042742; GO:0005576; GO:0005615; GO:0001968; GO:0001948; GO:0008083; GO:0043237; GO:0043066; GO:0031665; GO:0051533; GO:0008284; GO:0050679; GO:0016239; GO:0050731; GO:0051281; GO:0051047; GO:0047485; GO:0006473; GO:0034067; GO:0030141; GO:0070075	Evidence at protein level	SUBCELLULAR LOCATION: Secreted.			SIGNAL 1 19 {ECO:0000269|PubMed:25946035}.
O15230	LAMA5	GO:0001525; GO:0005605; GO:0005604; GO:0060445; GO:0001658; GO:0030154; GO:0016477; GO:0008283; GO:0008037; GO:0042384; GO:0007010; GO:0009790; GO:0045446; GO:0090002; GO:0070062; GO:0031012; GO:0030198; GO:0005576; GO:0005615; GO:0048041; GO:0001942; GO:0005178; GO:0007229; GO:0043259; GO:0043260; GO:0005610; GO:0030324; GO:0001738; GO:0016331; GO:0007517; GO:0001755; GO:0005634; GO:0042475; GO:…	Evidence at protein level	SUBCELLULAR LOCATION: Secreted, extracellular space, extracellular matrix, basement membrane. Note=Major component.			SIGNAL 1 35 {ECO:0000255}.
P55268	LAMB2	GO:0014044; GO:0014002; GO:0048677; GO:0007411; GO:0005605; GO:0005604; GO:0007155; GO:0070062; GO:0030198; GO:0005576; GO:0043260; GO:0005608; GO:0072274; GO:0072249; GO:0007528; GO:0060041; GO:0005198; GO:0045202; GO:0007601	Evidence at protein level	SUBCELLULAR LOCATION: Secreted, extracellular space, extracellular matrix, basement membrane. Note=S-laminin is concentrated in the synaptic cleft of the neuromuscular junction.			SIGNAL 1 32 {ECO:0000255}.
P62502	LCN6	GO:0005576; GO:0007338	Evidence at protein level	SUBCELLULAR LOCATION: Secreted. Note=Located on the head and tail of spermatozoa with the highest concentration on the post-acrosomal region of the head, where it appears aggregated into large patches.			SIGNAL 1 20 {ECO:0000255}.
Q08397	LOXL1	GO:0001669; GO:0035904; GO:0005604; GO:0005507; GO:0030198; GO:0005576; GO:0005615; GO:0055114; GO:0016641; GO:0018277; GO:0032496	Evidence at protein level	SUBCELLULAR LOCATION: Secreted, extracellular space {ECO:0000305}.			SIGNAL 1 25 {ECO:0000255}.
P18428	LBP	GO:0006953; GO:0009986; GO:0006968; GO:0071222; GO:0071223; GO:0050829; GO:0050830; GO:0032490; GO:0070062; GO:0005576; GO:0005615; GO:0045087; GO:0002232; GO:0001530; GO:0015920; GO:0031663; GO:0070891; GO:0001889; GO:0002281; GO:0016020; GO:0044130; GO:0032720; GO:0008228; GO:0032722; GO:0032755; GO:0032757; GO:0043032; GO:0090023; GO:0060100; GO:0060265; GO:0034145; GO:0042535; GO:0032760; GO:…	Evidence at protein level	SUBCELLULAR LOCATION: Secreted {ECO:0000269|PubMed:2402637, ECO:0000269|PubMed:24120359, ECO:0000269|PubMed:7517398}. Cytoplasmic granule membrane {ECO:0000250|UniProtKB:P17213}. Note=Membrane-associated in polymorphonuclear Leukocytes (PMN) granules. {ECO:0000250|UniProtKB:P17213}.			SIGNAL 1 25 {ECO:0000269|PubMed:2402637}.
Q6JVE6	LCN10	GO:0005576; GO:0006810	Evidence at protein level	SUBCELLULAR LOCATION: Secreted {ECO:0000305}.			SIGNAL 1 19 {ECO:0000255}.
O14960	LECT2	GO:0006935; GO:0005737; GO:0005615; GO:0042802; GO:0001501	Evidence at protein level	SUBCELLULAR LOCATION: Cytoplasm {ECO:0000269|PubMed:8877413}. Secreted {ECO:0000269|PubMed:8877413}.			SIGNAL 1 18 {ECO:0000250}.
Q6P5S2	LEG1	GO:0070062; GO:0005615; GO:0007275	Evidence at protein level	SUBCELLULAR LOCATION: Secreted {ECO:0000250|UniProtKB:A5PF61, ECO:0000250|UniProtKB:Q4QRF7}.			SIGNAL 1 20 {ECO:0000255}.
O00292	LEFTY2	GO:0060395; GO:0048468; GO:0016049; GO:0005125; GO:0031012; GO:0005576; GO:0005615; GO:0007275; GO:0031093; GO:0002576; GO:0010862; GO:0043408; GO:0042981; GO:0005160; GO:0007179	Evidence at protein level	SUBCELLULAR LOCATION: Secreted.			SIGNAL 1 21 {ECO:0000255}.
Q08380	LGALS3BP	GO:0072562; GO:0007155; GO:0006968; GO:0070062; GO:0005576; GO:0005615; GO:0016020; GO:0002576; GO:0031089; GO:0005578; GO:0005044; GO:0007165	Evidence at protein level	SUBCELLULAR LOCATION: Secreted {ECO:0000269|PubMed:8390986}. Secreted, extracellular space, extracellular matrix {ECO:0000269|PubMed:9501082}.			SIGNAL 1 18 {ECO:0000269|PubMed:8390986, ECO:0000269|PubMed:8454062, ECO:0000269|PubMed:8757764}.
P15018	LIF	GO:0048708; GO:0001974; GO:0005125; GO:0005737; GO:0046697; GO:0007566; GO:0005576; GO:0005615; GO:0008083; GO:0006955; GO:0005146; GO:0048861; GO:0048286; GO:0060463; GO:0060426; GO:0007275; GO:0048644; GO:0070373; GO:0016525; GO:0008285; GO:0046888; GO:0045835; GO:0048666; GO:0031100; GO:0043410; GO:0048711; GO:0008284; GO:0051461; GO:1901676; GO:0045651; GO:0072108; GO:0010976; GO:0033138; GO:…	Evidence at protein level	SUBCELLULAR LOCATION: Secreted.			SIGNAL 1 22 {ECO:0000269|PubMed:2730639}.
Q8WWY8	LIPH	GO:0052689; GO:0005615; GO:0008201; GO:0016042; GO:0044241; GO:0004620; GO:0005886	Evidence at protein level	SUBCELLULAR LOCATION: Secreted. Membrane; Peripheral membrane protein.			SIGNAL 1 18 {ECO:0000255}.
P54317	PNLIPRP2	GO:0047372; GO:0005509; GO:0005576; GO:0005615; GO:0047714; GO:0019376; GO:0044241; GO:0004620; GO:0009395; GO:0004806; GO:0006641	Evidence at protein level	SUBCELLULAR LOCATION: Secreted {ECO:0000269|PubMed:18702514, ECO:0000269|PubMed:19824014}.			SIGNAL 1 17 {ECO:0000255}.
Q8N6C8	LILRA3	GO:0002250; GO:0003823; GO:0006952; GO:0005576; GO:0005886; GO:0004872; GO:0007165	Evidence at protein level	SUBCELLULAR LOCATION: Secreted {ECO:0000305}.			SIGNAL 1 23 {ECO:0000269|PubMed:15340161}.
P41159	LEP	GO:0030217; GO:1990051; GO:0060612; GO:0008343; GO:0001525; GO:0008206; GO:0098868; GO:0035630; GO:0003300; GO:0071298; GO:0044320; GO:0071300; GO:0021954; GO:0008203; GO:0007623; GO:0005737; GO:0042755; GO:0006112; GO:0005576; GO:0005615; GO:0006635; GO:0007565; GO:0042593; GO:0006006; GO:0006114; GO:0005179; GO:0042445; GO:0030073; GO:0072604; GO:0072606; GO:0050892; GO:0033210; GO:0050901; GO:…	Evidence at protein level	SUBCELLULAR LOCATION: Secreted {ECO:0000305|PubMed:25232147}.			SIGNAL 1 21 {ECO:0000255}.
P11150	LIPC	GO:0047372; GO:0034185; GO:0009986; GO:0032870; GO:0042632; GO:0008203; GO:0034382; GO:0034371; GO:0007623; GO:0048589; GO:0005769; GO:0005788; GO:0005576; GO:0005615; GO:0006633; GO:0015012; GO:0008201; GO:0034364; GO:0034375; GO:0034373; GO:0005770; GO:0008289; GO:0044241; GO:0001889; GO:0030169; GO:0034383; GO:0034374; GO:0004622; GO:0005902; GO:0046473; GO:0008970; GO:0034638; GO:0046337; GO:…	Evidence at protein level	SUBCELLULAR LOCATION: Secreted.			SIGNAL 1 22
P16233	PNLIP	GO:0005576; GO:0030299; GO:0016042; GO:0044241; GO:0046872; GO:0061365; GO:0001523; GO:0004806	Evidence at protein level	SUBCELLULAR LOCATION: Secreted.			SIGNAL 1 16
P54315	PNLIPRP1	GO:0005509; GO:0005576; GO:0006629; GO:0004806	Evidence at protein level	SUBCELLULAR LOCATION: Secreted {ECO:0000269|PubMed:1379598, ECO:0000269|PubMed:19824014}.			SIGNAL 1 17 {ECO:0000255}.
P01229	LHB	GO:0005796; GO:0007267; GO:0070062; GO:0005576; GO:0008584; GO:0016486; GO:0006701; GO:0005102; GO:0007165	Evidence at protein level	SUBCELLULAR LOCATION: Secreted.			SIGNAL 1 20 {ECO:0000269|PubMed:1191677}.
Q14767	LTBP2	GO:0005509; GO:0070062; GO:0043206; GO:0005615; GO:0008201; GO:0005622; GO:0009306; GO:0006605; GO:0005578; GO:0007179	Evidence at protein level	SUBCELLULAR LOCATION: Secreted {ECO:0000250}. Note=Localized in nuchal ligament and aorta to the fibrillin-containing, microfibrillar component of elastic fibers. {ECO:0000250}.			SIGNAL 1 35 {ECO:0000250|UniProtKB:O35806}.
Q8N2S1	LTBP4	GO:0005509; GO:0070062; GO:0031012; GO:0005576; GO:0005615; GO:0005539; GO:0030252; GO:0005178; GO:0007275; GO:0006457; GO:0005578; GO:0045595; GO:0001558; GO:0030162; GO:0017015; GO:0050431; GO:0005024	Evidence at protein level	SUBCELLULAR LOCATION: Secreted, extracellular space, extracellular matrix {ECO:0000269|PubMed:16157329, ECO:0000269|PubMed:9660815}.			SIGNAL 1 27 {ECO:0000255}.
Q5SRR4	LY6G5C	GO:0005576	Evidence at protein level	SUBCELLULAR LOCATION: Secreted {ECO:0000305}.			SIGNAL 1 41 {ECO:0000255}.
O95970	LGI1	GO:0007411; GO:0030054; GO:0008283; GO:0005576; GO:0005615; GO:0007399; GO:0031175; GO:0030307; GO:0050806; GO:0051260; GO:0005102; GO:0045202	Evidence at protein level	SUBCELLULAR LOCATION: Secreted {ECO:0000269|PubMed:16787412, ECO:0000269|PubMed:17067999, ECO:0000269|PubMed:17296837}. Cell junction, synapse {ECO:0000250}. Note=Isoform 1 but not isoform 2 is secreted. Isoform 1 is enriched in the Golgi apparatus while isoform 2 accumulates in the endoplasmic reticulum.			SIGNAL 1 34 {ECO:0000255}.
Q6XZB0	LIPI	GO:0052689; GO:0005576; GO:0005615; GO:0008201; GO:0016042; GO:0044241; GO:0004620; GO:0005886	Evidence at protein level	SUBCELLULAR LOCATION: Isoform 1: Membrane. Secreted. Note=May associate with lipid draft.; SUBCELLULAR LOCATION: Isoform 2: Membrane. Note=May associate with lipid draft.			SIGNAL 1 15 {ECO:0000255}.
Q96II8	LRCH3	GO:0005737; GO:0005576	Evidence at protein level	SUBCELLULAR LOCATION: Secreted {ECO:0000305}.			SIGNAL 1 22 {ECO:0000255}.
Q86SG7	LYG2	GO:0016998; GO:0005576; GO:0003796; GO:0009253	Evidence at protein level	SUBCELLULAR LOCATION: Secreted {ECO:0000305}.			SIGNAL 1 19 {ECO:0000255}.
P07098	LIPF	GO:0005576; GO:0008289; GO:0016042; GO:0016615; GO:0006108; GO:0005739; GO:0004806; GO:0006641	Evidence at protein level	SUBCELLULAR LOCATION: Secreted.			SIGNAL 1 19 {ECO:0000269|PubMed:2753032}.
Q9Y4K0	LOXL2	GO:0007568; GO:0005604; GO:0007155; GO:0006464; GO:0003682; GO:0005694; GO:0030199; GO:0005507; GO:0009055; GO:0043542; GO:0001935; GO:0001837; GO:0005615; GO:0016570; GO:0016020; GO:0035064; GO:0045892; GO:0005654; GO:0005634; GO:0070492; GO:0055114; GO:0032332; GO:0018277; GO:0004720; GO:0046688; GO:0001666; GO:0005044; GO:0002040; GO:0003714; GO:0006351	Evidence at protein level	SUBCELLULAR LOCATION: Secreted, extracellular space, extracellular matrix, basement membrane {ECO:0000250}. Nucleus. Chromosome. Note=Associated with chromatin. It is unclear how LOXL2 is nuclear: it contains a clear signal sequence and is predicted to localize in the extracellular medium. However, different reports confirmed the intracellular location and its key role in transcription regulation.			SIGNAL 1 25 {ECO:0000255}.
Q96JB6	LOXL4	GO:0005507; GO:0070062; GO:0005615; GO:0016020; GO:0016641; GO:0043235; GO:0005044	Evidence at protein level	SUBCELLULAR LOCATION: Secreted, extracellular space {ECO:0000305}.			SIGNAL 1 24 {ECO:0000255}.
Q8NDX9	LY6G5B	GO:0005576	Evidence at protein level	SUBCELLULAR LOCATION: Secreted {ECO:0000305}.			SIGNAL 1 18 {ECO:0000255}.
O95460	MATN4	GO:0005509; GO:0030198; GO:0005576	Evidence at protein level	SUBCELLULAR LOCATION: Secreted.			SIGNAL 1 18 {ECO:0000250}.
O95711	LY86	GO:0006915; GO:0008283; GO:0005615; GO:0006959; GO:0006954; GO:0045087; GO:0005886; GO:0031666	Evidence at protein level	SUBCELLULAR LOCATION: Secreted, extracellular space. Note=Associated with CD180 at the cell surface.			SIGNAL 1 20 {ECO:0000269|PubMed:15340161}.
P61626	LYZ	GO:0044267; GO:0019835; GO:0042742; GO:0070062; GO:0005576; GO:0005615; GO:0042802; GO:0006954; GO:0003796; GO:0001895	Evidence at protein level	SUBCELLULAR LOCATION: Secreted.			SIGNAL 1 18 {ECO:0000269|PubMed:11946553, ECO:0000269|PubMed:11946554, ECO:0000269|PubMed:25946035, ECO:0000269|PubMed:5168859, ECO:0000269|PubMed:5284421}.
P48740	MASP1	GO:0005509; GO:0048306; GO:0006956; GO:0001867; GO:0005576; GO:0005615; GO:0045916; GO:0008233; GO:0042803; GO:0006898; GO:0004252	Evidence at protein level	SUBCELLULAR LOCATION: Secreted {ECO:0000269|PubMed:11485744}.			SIGNAL 1 19 {ECO:0000269|PubMed:11290788}.
O00187	MASP2	GO:0005509; GO:0048306; GO:0006956; GO:0006958; GO:0001867; GO:0001855; GO:0070062; GO:0005576; GO:0008233; GO:0004252	Evidence at protein level	SUBCELLULAR LOCATION: Secreted.			SIGNAL 1 15 {ECO:0000255}.
Q14766	LTBP1	GO:0035904; GO:0005509; GO:0060976; GO:0031012; GO:0005576; GO:0001527; GO:0050436; GO:0043234; GO:0005578; GO:0035583; GO:0050431; GO:0005024; GO:0003281	Evidence at protein level	SUBCELLULAR LOCATION: Secreted.			SIGNAL 1 23 {ECO:0000255}.
Q9NS15	LTBP3	GO:0005509; GO:0070062; GO:0031012; GO:0005576; GO:2000741; GO:1902462; GO:0036363; GO:0050431	Evidence at protein level	SUBCELLULAR LOCATION: Secreted {ECO:0000250}. Note=Secretion occurs after coexpression with TGFB1 and requires complexing with 'Cys-33' of the TGFB1 propeptide. {ECO:0000250}.			SIGNAL 1 43 {ECO:0000255}.
P51884	LUM	GO:0005796; GO:0051216; GO:0005518; GO:0030199; GO:0070062; GO:0030198; GO:0005201; GO:0005576; GO:0005615; GO:0005583; GO:0018146; GO:0042340; GO:0043202; GO:0045944; GO:0032914; GO:0005578; GO:0070848; GO:0014070; GO:0007601	Evidence at protein level	SUBCELLULAR LOCATION: Secreted, extracellular space, extracellular matrix {ECO:0000250}.			SIGNAL 1 18
Q9Y6Y9	LY96	GO:0007249; GO:0002755; GO:0002756; GO:0035666; GO:0097190; GO:0007166; GO:0006968; GO:0015026; GO:0032497; GO:0010008; GO:0005615; GO:0006954; GO:0045087; GO:0031226; GO:0001875; GO:0046696; GO:0070266; GO:0034128; GO:0005886; GO:0031666; GO:0032760; GO:0032496; GO:0034142	Evidence at protein level	SUBCELLULAR LOCATION: Secreted, extracellular space {ECO:0000269|PubMed:10359581, ECO:0000269|PubMed:11593030, ECO:0000305|PubMed:11274165}. Secreted {ECO:0000269|PubMed:11593030}. Note=Retained in the extracellular space at the cell surface by interaction with TLR4 (PubMed:10359581). {ECO:0000269|PubMed:10359581, ECO:0000269|PubMed:11593030}.			SIGNAL 1 18 {ECO:0000255}.
P28300	LOX	GO:0035904; GO:0006464; GO:0030199; GO:0005581; GO:0005507; GO:0048251; GO:0030198; GO:0005576; GO:0005615; GO:0007507; GO:0030324; GO:0005634; GO:0004720; GO:0005578; GO:0042493; GO:0048545; GO:0042060	Evidence at protein level	SUBCELLULAR LOCATION: Secreted, extracellular space.			SIGNAL 1 21 {ECO:0000250|UniProtKB:P16636}.
P55145	MANF	GO:0005576; GO:0005634; GO:0044822; GO:0006986	Evidence at protein level	SUBCELLULAR LOCATION: Secreted {ECO:0000269|PubMed:12794311, ECO:0000269|PubMed:18561914}.			SIGNAL 1 24 {ECO:0000269|PubMed:12665801, ECO:0000269|PubMed:12794311}.
P21941	MATN1	GO:0005509; GO:0030198; GO:0005201; GO:0005576; GO:0003429; GO:0006461; GO:0005578; GO:0030500	Evidence at protein level	SUBCELLULAR LOCATION: Secreted, extracellular space, extracellular matrix.			SIGNAL 1 22
O15232	MATN3	GO:0005509; GO:0030198; GO:0005201; GO:0005576; GO:0005578; GO:0001501	Evidence at protein level	SUBCELLULAR LOCATION: Secreted.			SIGNAL 1 28 {ECO:0000255}.
Q86Y78	LYPD6	GO:0005576	Evidence at protein level	SUBCELLULAR LOCATION: Secreted {ECO:0000305}.			SIGNAL 1 22 {ECO:0000269|PubMed:15340161}.
P11226	MBL2	GO:0006953; GO:0005509; GO:0048306; GO:0009986; GO:0005581; GO:0006956; GO:0006958; GO:0001867; GO:0050830; GO:0042742; GO:0005576; GO:0005615; GO:0045087; GO:0051873; GO:0005537; GO:0044130; GO:0048525; GO:0008228; GO:0050766; GO:0005102; GO:0006979; GO:0004252	Evidence at protein level	SUBCELLULAR LOCATION: Secreted {ECO:0000269|PubMed:7982896}.			SIGNAL 1 20 {ECO:0000269|PubMed:7982896}.
Q13361	MFAP5	GO:0060216; GO:0043206; GO:0030198; GO:0005201; GO:0005576; GO:0001527	Evidence at protein level	SUBCELLULAR LOCATION: Secreted, extracellular space, extracellular matrix.			SIGNAL 1 21 {ECO:0000255}.
O00339	MATN2	GO:0007411; GO:0005604; GO:0005509; GO:0031104; GO:0008347; GO:0001764; GO:0005578; GO:0048678	Evidence at protein level	SUBCELLULAR LOCATION: Secreted.			SIGNAL 1 23 {ECO:0000255}.
P20382	PMCH	GO:0030154; GO:0005576; GO:0007631; GO:0007275; GO:0007218; GO:0005634; GO:0007283; GO:0007268	Evidence at protein level	SUBCELLULAR LOCATION: Secreted.			SIGNAL 1 21 {ECO:0000255}.
Q9NQ76	MEPE	GO:0031214; GO:1990430; GO:0005201; GO:0030502; GO:0005578; GO:0046850; GO:0001501	Evidence at protein level	SUBCELLULAR LOCATION: Secreted, extracellular space, extracellular matrix.			SIGNAL 1 17 {ECO:0000255}.
Q08431	MFGE8	GO:0001525; GO:0007155; GO:0044267; GO:0009897; GO:0070062; GO:0005576; GO:0005615; GO:1903561; GO:0019897; GO:0016020; GO:0006911; GO:0006910; GO:0008429; GO:0001786; GO:2000427; GO:0008284; GO:0043627; GO:0007338; GO:0016032	Evidence at protein level	SUBCELLULAR LOCATION: Membrane {ECO:0000269|PubMed:19204935}; Peripheral membrane protein {ECO:0000269|PubMed:19204935}. Secreted {ECO:0000269|PubMed:19204935}.			SIGNAL 1 23
Q96PC5	MIA2	GO:0042632; GO:0070971; GO:0005576; GO:0070328	Evidence at protein level	SUBCELLULAR LOCATION: Secreted {ECO:0000305}.			SIGNAL 1 22 {ECO:0000255}.
P08493	MGP	GO:0005509; GO:0001502; GO:0030154; GO:0070062; GO:0005201; GO:0001503; GO:0005578; GO:0030500; GO:0008147	Evidence at protein level	SUBCELLULAR LOCATION: Secreted.			SIGNAL 1 19
P24347	MMP11	GO:0005796; GO:0071711; GO:0005509; GO:0030574; GO:0030199; GO:0022617; GO:0005576; GO:0004222; GO:0007275; GO:0045599; GO:0005578; GO:0006508; GO:0004252; GO:0008270	Evidence at protein level	SUBCELLULAR LOCATION: Secreted, extracellular space, extracellular matrix {ECO:0000305}.			SIGNAL 1 31 {ECO:0000255}.
P08253	MMP2	GO:0001525; GO:0001955; GO:0060346; GO:0044267; GO:0071230; GO:0030574; GO:0007566; GO:0035987; GO:0048013; GO:0022617; GO:0005576; GO:0005615; GO:0060325; GO:0001957; GO:0004222; GO:0008237; GO:0005739; GO:0005634; GO:0005886; GO:0045089; GO:0005578; GO:0006508; GO:0001666; GO:0030017; GO:0004252; GO:0008270	Evidence at protein level	SUBCELLULAR LOCATION: Isoform 1: Secreted, extracellular space, extracellular matrix. Membrane. Nucleus. Note=Colocalizes with integrin alphaV/beta3 at the membrane surface in angiogenic blood vessels and melanomas. Found in mitochondria, along microfibrils, and in nuclei of cardiomyocytes.; SUBCELLULAR LOCATION: Isoform 2: Cytoplasm. Mitochondrion.			SIGNAL 1 29 {ECO:0000250|UniProtKB:P33436}.
O75095	MEGF6	GO:0005509; GO:0005576	Evidence at protein level	SUBCELLULAR LOCATION: Secreted {ECO:0000305}.			SIGNAL 1 30 {ECO:0000255}.
P21741	MDK	GO:0007219; GO:0030325; GO:0001662; GO:0030154; GO:0016477; GO:0042995; GO:0021681; GO:0021987; GO:0005737; GO:0030421; GO:0021542; GO:0005576; GO:0008083; GO:0008201; GO:0043524; GO:0007399; GO:0051781; GO:0045893; GO:0050795; GO:0042493; GO:0051384; GO:0009611; GO:0007614; GO:0007165	Evidence at protein level	SUBCELLULAR LOCATION: Secreted.			SIGNAL 1 20 {ECO:0000269|PubMed:15340161, ECO:0000269|PubMed:1883381, ECO:0000269|PubMed:8241100}.
P09237	MMP7	GO:0007568; GO:0009986; GO:0071260; GO:0030574; GO:0044849; GO:0070062; GO:0022617; GO:0005576; GO:0005615; GO:0008201; GO:0060135; GO:0004222; GO:0005578; GO:0006508; GO:0031667; GO:0004252; GO:0008270	Evidence at protein level	SUBCELLULAR LOCATION: Secreted, extracellular space, extracellular matrix {ECO:0000305}.			SIGNAL 1 17 {ECO:0000269|PubMed:2253219}.
P22894	MMP8	GO:0005509; GO:0030574; GO:0035987; GO:0022617; GO:0005576; GO:0005615; GO:0004222; GO:0005578; GO:0006508; GO:0004252; GO:0008270	Evidence at protein level	SUBCELLULAR LOCATION: Cytoplasmic granule. Secreted, extracellular space, extracellular matrix {ECO:0000305}. Note=Stored in intracellular granules.			SIGNAL 1 20 {ECO:0000269|PubMed:1662606, ECO:0000269|PubMed:2159879}.
P14780	MMP9	GO:0005518; GO:0030574; GO:0007566; GO:0035987; GO:0004175; GO:0048013; GO:0070062; GO:0022617; GO:0005576; GO:0005615; GO:0042802; GO:0050900; GO:0030225; GO:0004222; GO:0008237; GO:0043066; GO:2001258; GO:2001268; GO:2001243; GO:0001503; GO:0043388; GO:0045742; GO:0051549; GO:0001934; GO:1900122; GO:0090200; GO:0005578; GO:0006508; GO:0004252; GO:0001501; GO:0008270	Evidence at protein level	SUBCELLULAR LOCATION: Secreted, extracellular space, extracellular matrix {ECO:0000305}.			SIGNAL 1 19 {ECO:0000269|PubMed:1371271, ECO:0000269|PubMed:1400481, ECO:0000269|PubMed:1464361, ECO:0000269|PubMed:1653055, ECO:0000269|PubMed:2551898, ECO:0000269|PubMed:7669817}.
P55083	MFAP4	GO:0009650; GO:0007155; GO:0071493; GO:0071953; GO:0048251; GO:0070062; GO:0043206; GO:0005576; GO:0001527; GO:0010712	Evidence at protein level	SUBCELLULAR LOCATION: Secreted, extracellular space, extracellular matrix.			SIGNAL 1 21 {ECO:0000269|PubMed:15340161}.
P20774	OGN	GO:0005796; GO:0007409; GO:0070062; GO:0005576; GO:0005615; GO:1903561; GO:0008201; GO:0018146; GO:0042340; GO:0043202; GO:0048662; GO:0005578	Evidence at protein level	SUBCELLULAR LOCATION: Secreted, extracellular space, extracellular matrix {ECO:0000250}.			SIGNAL 1 20 {ECO:0000269|PubMed:15340161}.
P45452	MMP13	GO:0005794; GO:0030282; GO:0060349; GO:0005509; GO:0044267; GO:0071498; GO:0005518; GO:0030574; GO:0035116; GO:0001958; GO:0044849; GO:0022617; GO:0005576; GO:0005615; GO:0003417; GO:0007507; GO:0046581; GO:0001554; GO:0005764; GO:0004222; GO:0001649; GO:0007567; GO:0043171; GO:1904244; GO:0005578; GO:0006508; GO:0042493; GO:0043627; GO:0001666; GO:0009612; GO:0004252; GO:0008270	Evidence at protein level	SUBCELLULAR LOCATION: Secreted, extracellular space, extracellular matrix {ECO:0000305|PubMed:8576151}. Secreted {ECO:0000269|PubMed:8576151}.			SIGNAL 1 19 {ECO:0000269|PubMed:8576151}.
Q99542	MMP19	GO:0001525; GO:0005509; GO:0030154; GO:0030574; GO:0022617; GO:0005576; GO:0001554; GO:0004222; GO:0001541; GO:0001542; GO:0005578; GO:0006508; GO:0051591; GO:0009725; GO:0004252; GO:0008270	Evidence at protein level	SUBCELLULAR LOCATION: Secreted, extracellular space, extracellular matrix {ECO:0000250}.			SIGNAL 1 18 {ECO:0000255}.
P03956	MMP1	GO:0005509; GO:0044267; GO:0030574; GO:0004175; GO:0022617; GO:0005576; GO:0050900; GO:0004222; GO:0032461; GO:0005578; GO:0006508; GO:0004252; GO:0016032; GO:0008270	Evidence at protein level	SUBCELLULAR LOCATION: Secreted, extracellular space, extracellular matrix {ECO:0000305|PubMed:2167156}.			SIGNAL 1 19
P03971	AMH	GO:0001880; GO:0007568; GO:0007267; GO:0005576; GO:0005615; GO:0007506; GO:0005179; GO:2000355; GO:0051092; GO:0010628; GO:0001546; GO:0005102; GO:0042493; GO:0014070; GO:0007530; GO:0007548; GO:0001655	Evidence at protein level	SUBCELLULAR LOCATION: Secreted.			SIGNAL 1 18 {ECO:0000255}.
P09238	MMP10	GO:0005509; GO:0030574; GO:0022617; GO:0005576; GO:0005615; GO:0004222; GO:0005578; GO:0006508; GO:0030334; GO:0004252; GO:0008270	Evidence at protein level	SUBCELLULAR LOCATION: Secreted, extracellular space, extracellular matrix {ECO:0000305}.			SIGNAL 1 17 {ECO:0000305}.
Q13201	MMRN1	GO:0007596; GO:0005509; GO:0007155; GO:0005576; GO:0031093; GO:0002576	Evidence at protein level	SUBCELLULAR LOCATION: Secreted {ECO:0000305}.			SIGNAL 1 19 {ECO:0000255}.
Q16674	MIA	GO:0008283; GO:0005615	Evidence at protein level	SUBCELLULAR LOCATION: Secreted.			SIGNAL 1 24 {ECO:0000269|PubMed:15340161}.
P12872	MLN	GO:0007186; GO:0007267; GO:0005576; GO:0005102	Evidence at protein level	SUBCELLULAR LOCATION: Secreted.			SIGNAL 1 25 {ECO:0000269|PubMed:15340161}.
O60882	MMP20	GO:0097186; GO:0005509; GO:0030574; GO:0022617; GO:0005576; GO:0005615; GO:0004222; GO:0030163; GO:0005578; GO:0006508; GO:0070173; GO:0004252; GO:0008270	Evidence at protein level	SUBCELLULAR LOCATION: Secreted, extracellular space, extracellular matrix {ECO:0000250}.			SIGNAL 1 22 {ECO:0000255}.
P08254	MMP3	GO:0005509; GO:0071732; GO:0030574; GO:0004175; GO:0022617; GO:0005576; GO:0005615; GO:0004222; GO:0010727; GO:1903209; GO:0032461; GO:0005578; GO:0006508; GO:0004252; GO:0008270	Evidence at protein level	SUBCELLULAR LOCATION: Secreted, extracellular space, extracellular matrix {ECO:0000305}.			SIGNAL 1 17 {ECO:0000305|PubMed:3360803}.
P08118	MSMB	GO:0005615; GO:0005634	Evidence at protein level	SUBCELLULAR LOCATION: Secreted. Note=Sperm surface.			SIGNAL 1 20 {ECO:0000269|PubMed:11788998, ECO:0000269|PubMed:1930232, ECO:0000269|PubMed:3995056, ECO:0000269|PubMed:6434350, ECO:0000269|PubMed:7671139}.
Q1L6U9	MSMP	GO:0005737; GO:0005615	Evidence at protein level	SUBCELLULAR LOCATION: Secreted {ECO:0000269|PubMed:17338636}.			SIGNAL 1 35 {ECO:0000255}.
P39900	MMP12	GO:0005509; GO:0030574; GO:0004175; GO:0022617; GO:0005576; GO:0004222; GO:0060054; GO:0005578; GO:0006508; GO:0042493; GO:0014070; GO:0004252; GO:0035313; GO:0008270	Evidence at protein level	SUBCELLULAR LOCATION: Secreted, extracellular space, extracellular matrix {ECO:0000305}.			SIGNAL 1 16 {ECO:0000305}.
Q9H8L6	MMRN2	GO:0001525; GO:0005604; GO:0070062; GO:0005615; GO:0090051; GO:0030948	Evidence at protein level	SUBCELLULAR LOCATION: Secreted, extracellular space, extracellular matrix {ECO:0000269|PubMed:11559704}.			SIGNAL 1 22 {ECO:0000255}.
Q6W4X9	MUC6	GO:0005796; GO:0016266; GO:0005201; GO:0005576; GO:0030277	Evidence at protein level	SUBCELLULAR LOCATION: Secreted.			SIGNAL 1 22 {ECO:0000255}.
Q8N307	MUC20	GO:0005796; GO:0016266; GO:0000187; GO:0016324; GO:0009925; GO:0005576; GO:0048012; GO:0031528; GO:0051260	Evidence at protein level	SUBCELLULAR LOCATION: Secreted {ECO:0000305}. Apical cell membrane {ECO:0000269|PubMed:14565953}. Basolateral cell membrane {ECO:0000269|PubMed:14565953}. Cell projection, microvillus membrane {ECO:0000269|PubMed:14565953}.			SIGNAL 1 25 {ECO:0000255}.
P98088	MUC5AC	GO:0005796; GO:0016266; GO:0005737; GO:0070062; GO:0043206; GO:0005201; GO:0005615; GO:0043205; GO:0036438; GO:0048015	Evidence at protein level	SUBCELLULAR LOCATION: Secreted {ECO:0000269|PubMed:14718370}.			SIGNAL 1 27 {ECO:0000255}.
Q9HC84	MUC5B	GO:0005796; GO:0016266; GO:0042742; GO:0070062; GO:0005615; GO:0043231; GO:0043030	Evidence at protein level	SUBCELLULAR LOCATION: Secreted.			SIGNAL 1 25 {ECO:0000255}.
Q96DR8	MUCL1	GO:0005796; GO:0016266; GO:0005576; GO:0016020	Evidence at protein level	SUBCELLULAR LOCATION: Secreted {ECO:0000305|PubMed:15880534}. Membrane {ECO:0000305|PubMed:15880534}.			SIGNAL 1 20 {ECO:0000269|PubMed:15340161}.
Q99972	MYOC	GO:0038133; GO:0005794; GO:0060348; GO:0005929; GO:0045162; GO:0031410; GO:0016023; GO:0005783; GO:0070062; GO:0031012; GO:0005615; GO:0001968; GO:0005109; GO:0046872; GO:0005743; GO:0005758; GO:0005741; GO:0022011; GO:0032027; GO:0035024; GO:0001953; GO:0051497; GO:0031175; GO:0033268; GO:0038031; GO:0001649; GO:0030335; GO:0051894; GO:0051901; GO:0014068; GO:0051897; GO:0051496; GO:1900026; GO:…	Evidence at protein level	SUBCELLULAR LOCATION: Secreted {ECO:0000269|PubMed:11431441, ECO:0000269|PubMed:12697062, ECO:0000269|PubMed:19287508, ECO:0000269|PubMed:9497363}. Golgi apparatus {ECO:0000269|PubMed:11053284}. Cytoplasmic vesicle {ECO:0000269|PubMed:11431441}. Secreted, extracellular space. Secreted, extracellular space, extracellular matrix {ECO:0000269|PubMed:11773026, ECO:0000305|PubMed:11431441}. Secreted, …			SIGNAL 1 32 {ECO:0000269|PubMed:19287508, ECO:0000269|PubMed:9497363}.
Q969H8	MYDGF	GO:0036498; GO:0001525; GO:0006915; GO:0005788; GO:0005793; GO:0070062; GO:0005615; GO:0043066; GO:0043410; GO:0045766; GO:0001938; GO:0014068; GO:0051897; GO:0001934; GO:0045944	Evidence at protein level	SUBCELLULAR LOCATION: Secreted {ECO:0000269|PubMed:17362502, ECO:0000269|PubMed:25581518}. Endoplasmic reticulum-Golgi intermediate compartment {ECO:0000269|PubMed:17362502}. Note=Secreted into blood plasma. {ECO:0000269|PubMed:25581518}.			SIGNAL 1 31 {ECO:0000269|PubMed:19892738}.
O96009	NAPSA	GO:0097208; GO:0004190; GO:0044267; GO:0004175; GO:0070062; GO:0005615; GO:0005764; GO:0033619; GO:0097486; GO:0008233; GO:0030163; GO:0006508; GO:0043129	Evidence at protein level	SUBCELLULAR LOCATION: Secreted {ECO:0000305}.			SIGNAL 1 25 {ECO:0000255}.
P41271	NBL1	GO:0036122; GO:0048263; GO:0005615; GO:0016015; GO:0030514; GO:0090027; GO:0007399; GO:0048812; GO:0045666; GO:0042803; GO:0038098; GO:0035582	Evidence at protein level	SUBCELLULAR LOCATION: Secreted.			SIGNAL 1 16 {ECO:0000269|PubMed:11594460}.
Q8WU39	MZB1	GO:0006915; GO:0005737; GO:0034663; GO:0005788; GO:0005576; GO:0033622; GO:2001274; GO:0008284; GO:0002642; GO:0030888; GO:0042127	Evidence at protein level	SUBCELLULAR LOCATION: Isoform 1: Endoplasmic reticulum lumen {ECO:0000269|PubMed:19805157}. Secreted {ECO:0000269|PubMed:21688198}.; SUBCELLULAR LOCATION: Isoform 2: Cytoplasm {ECO:0000269|PubMed:11350957}. Note=Diffuse granular localization in the cytoplasm surrounding the nucleus (PubMed:11350957).			SIGNAL 1 22 {ECO:0000255}.
O00634	NTN3	GO:0005794; GO:0007411; GO:0005578	Evidence at protein level	SUBCELLULAR LOCATION: Secreted, extracellular space, extracellular matrix {ECO:0000250}.			SIGNAL 1 27 {ECO:0000255}.
P01185	AVP	GO:0070371; GO:0031894; GO:0007267; GO:0043027; GO:0005829; GO:0030425; GO:0005576; GO:0005615; GO:0006091; GO:0007625; GO:0042538; GO:0007626; GO:0002125; GO:0042711; GO:0043066; GO:0043154; GO:0007621; GO:0090201; GO:0051970; GO:0005184; GO:0043084; GO:0030819; GO:0030307; GO:0008284; GO:0032849; GO:0007204; GO:0010628; GO:0014049; GO:0033138; GO:0031394; GO:0003084; GO:0045907; GO:0070528; GO:…	Evidence at protein level	SUBCELLULAR LOCATION: Secreted.			SIGNAL 1 19 {ECO:0000269|PubMed:13591312}.
P14543	NID1	GO:0005605; GO:0005604; GO:0071711; GO:0005509; GO:0071944; GO:0007160; GO:0005518; GO:0070062; GO:0031012; GO:0022617; GO:0030198; GO:0005576; GO:0032836; GO:0043236; GO:0010811; GO:0043394	Evidence at protein level	SUBCELLULAR LOCATION: Secreted, extracellular space, extracellular matrix, basement membrane.			SIGNAL 1 28
Q14112	NID2	GO:0005604; GO:0071711; GO:0005509; GO:0007155; GO:0007160; GO:0005518; GO:0070062; GO:0031012; GO:0030198; GO:0005576	Evidence at protein level	SUBCELLULAR LOCATION: Secreted, extracellular space, extracellular matrix, basement membrane.			SIGNAL 1 30 {ECO:0000269|PubMed:9733643}.
O14594	NCAN	GO:0005796; GO:0005509; GO:0030246; GO:0007155; GO:0007417; GO:0030206; GO:0030207; GO:0030208; GO:0030198; GO:0005201; GO:0005576; GO:0030203; GO:0005540; GO:0043202; GO:0005578; GO:0001501	Evidence at protein level	SUBCELLULAR LOCATION: Secreted {ECO:0000250}.			SIGNAL 1 22 {ECO:0000255}.
Q8TB73	NDNF	GO:0001525; GO:0016049; GO:0071456; GO:0031012; GO:0030198; GO:0005576; GO:0005539; GO:0008201; GO:0005622; GO:2000352; GO:0043524; GO:0001764; GO:0007263; GO:0019800; GO:0010811; GO:0010976; GO:0005578; GO:0002931; GO:0061042	Evidence at protein level	SUBCELLULAR LOCATION: Secreted {ECO:0000269|PubMed:20969804, ECO:0000269|PubMed:24706764}.			SIGNAL 1 19 {ECO:0000255}.
Q99574	SERPINI1	GO:0007417; GO:0070062; GO:0005615; GO:0007422; GO:0030155; GO:0004867	Evidence at protein level	SUBCELLULAR LOCATION: Secreted.			SIGNAL 1 16 {ECO:0000255}.
P80188	LCN2	GO:0006915; GO:0005623; GO:0006879; GO:0070062; GO:0005576; GO:0005615; GO:0045087; GO:0006811; GO:0005506; GO:0015891; GO:0036094; GO:0005215	Evidence at protein level	SUBCELLULAR LOCATION: Secreted {ECO:0000269|PubMed:12453413}. Note=Upon binding to the SLC22A17 (24p3R) receptor, it is internalized.			SIGNAL 1 20 {ECO:0000269|PubMed:7683678}.
Q6P988	NOTUM	GO:0016055; GO:0005576; GO:0030178; GO:1990699; GO:0004629; GO:1990697	Evidence at protein level	SUBCELLULAR LOCATION: Secreted {ECO:0000250|UniProtKB:Q9VUX3}.			SIGNAL 1 19 {ECO:0000255}.
Q99435	NELL2	GO:0005509; GO:0005737; GO:0030425; GO:0005615; GO:0008201; GO:0016020; GO:0070050; GO:0043204; GO:0070207; GO:0040008	Evidence at protein level	SUBCELLULAR LOCATION: Secreted {ECO:0000250|UniProtKB:Q62918}.			SIGNAL 1 21
Q9UMX5	NENF	GO:0012505; GO:0005615; GO:0016020; GO:0046872; GO:0032099; GO:0005654; GO:0005634; GO:0043410	Evidence at protein level	SUBCELLULAR LOCATION: Secreted, extracellular space {ECO:0000250}.			SIGNAL 1 31 {ECO:0000255}.
O95631	NTN1	GO:0032488; GO:0007265; GO:0033564; GO:0006915; GO:0007411; GO:0005604; GO:0005737; GO:0040023; GO:0005576; GO:0042472; GO:0060603; GO:0030517; GO:0001764; GO:0045773; GO:2000147; GO:0008284; GO:0030334; GO:0016337; GO:0006930	Evidence at protein level	SUBCELLULAR LOCATION: Secreted, extracellular space, extracellular matrix {ECO:0000250}.			SIGNAL 1 24 {ECO:0000255}.
P30990	NTS	GO:0043679; GO:0071549; GO:0071285; GO:1990090; GO:0048565; GO:0005576; GO:0006972; GO:0001889; GO:0043025; GO:0005184; GO:0050880; GO:0001975; GO:0097332; GO:0048678; GO:0042220; GO:0051412; GO:0032355; GO:0007165; GO:0030133; GO:0008542	Evidence at protein level	SUBCELLULAR LOCATION: Secreted. Cytoplasmic vesicle, secretory vesicle. Note=Packaged within secretory vesicles.			SIGNAL 1 23 {ECO:0000255}.
P08949	NMB	GO:0050482; GO:0007267; GO:0005829; GO:0005576; GO:0042593; GO:0005179; GO:0046888; GO:0043005; GO:0007218; GO:0008284; GO:0007204; GO:0046887; GO:0007165	Evidence at protein level	SUBCELLULAR LOCATION: Secreted.			SIGNAL 1 24
Q13253	NOG	GO:0030509; GO:0048318; GO:0051216; GO:0021533; GO:0019955; GO:0009953; GO:0042733; GO:0060272; GO:0048706; GO:0001706; GO:0001837; GO:0005576; GO:0005615; GO:0060325; GO:0060825; GO:0001701; GO:0060173; GO:0060425; GO:0001707; GO:0042474; GO:0008045; GO:0030514; GO:2001234; GO:0048712; GO:0090090; GO:0060044; GO:0061037; GO:0030336; GO:0060302; GO:0045668; GO:0060394; GO:0000122; GO:0007399; GO:…	Evidence at protein level	SUBCELLULAR LOCATION: Secreted.			SIGNAL 1 27 {ECO:0000255}.
P48745	CCN3	GO:0005112; GO:0001525; GO:0030424; GO:1990523; GO:0033627; GO:0060326; GO:0007267; GO:0002062; GO:0005737; GO:0030425; GO:0035767; GO:0071603; GO:0005576; GO:0010761; GO:0005921; GO:0061484; GO:0008201; GO:0005178; GO:0043231; GO:0042347; GO:0060392; GO:0060548; GO:0030308; GO:1902731; GO:0050728; GO:0046676; GO:0090027; GO:0010832; GO:1904057; GO:0043025; GO:0045747; GO:0005578; GO:0010468; GO:…	Evidence at protein level	SUBCELLULAR LOCATION: Secreted. Cytoplasm {ECO:0000269|PubMed:15181016}. Cell junction, gap junction {ECO:0000269|PubMed:15181016}. Note=Localizes at the Gap junction in presence of GJA1/CX43. {ECO:0000250|UniProtKB:Q9QZQ5}.			SIGNAL 1 31 {ECO:0000269|PubMed:15340161}.
Q00604	NDP	GO:0016055; GO:0060070; GO:0008283; GO:0009986; GO:0007267; GO:0005125; GO:0031012; GO:0035426; GO:0005615; GO:0005109; GO:0008083; GO:0007399; GO:0001890; GO:0051091; GO:0045893; GO:0042803; GO:0061299; GO:0007605; GO:0007165; GO:0007033; GO:0007601	Evidence at protein level	SUBCELLULAR LOCATION: Secreted {ECO:0000269|PubMed:9407136}.			SIGNAL 1 24 {ECO:0000255}.
Q92832	NELL1	GO:0005509; GO:0030154; GO:0005737; GO:0005576; GO:2000599; GO:0033689; GO:0007399; GO:0005635; GO:0048471; GO:0030501; GO:0045669; GO:0010468	Evidence at protein level	SUBCELLULAR LOCATION: Cytoplasm {ECO:0000269|PubMed:21723284}. Nucleus envelope {ECO:0000269|PubMed:21723284}. Secreted {ECO:0000250}. Note=Colocalizes with ATRAID on the nuclear envelope and the perinuclear region.			SIGNAL 1 21 {ECO:0000255}.
P01178	OXT	GO:0005829; GO:0042756; GO:0042755; GO:0005576; GO:0005615; GO:0007565; GO:0007625; GO:0007507; GO:0042538; GO:0060179; GO:0002125; GO:0042711; GO:0007613; GO:0045776; GO:0060455; GO:0035811; GO:0045777; GO:0007204; GO:0045925; GO:0060450; GO:0010701; GO:0045778; GO:0060406; GO:0032308; GO:0035815; GO:0051965; GO:0050806; GO:0070474; GO:0002027; GO:0051930; GO:0014823; GO:0001975; GO:0051591; GO:…	Evidence at protein level	SUBCELLULAR LOCATION: Secreted.			SIGNAL 1 19 {ECO:0000269|PubMed:13591312}.
Q99784	OLFM1	GO:0003190; GO:0030424; GO:0044295; GO:0060317; GO:0005623; GO:0030054; GO:0005783; GO:0005615; GO:0010629; GO:0007399; GO:0043025; GO:0023041; GO:0043204; GO:0010718; GO:0010628; GO:0030516; GO:0045202	Evidence at protein level	SUBCELLULAR LOCATION: Secreted {ECO:0000250|UniProtKB:O88998}. Cell junction, synapse {ECO:0000250|UniProtKB:O88998}. Endoplasmic reticulum {ECO:0000250|UniProtKB:O88998}. Cell projection, axon {ECO:0000250|UniProtKB:O88998}. Perikaryon {ECO:0000250|UniProtKB:O88998}.			SIGNAL 1 16 {ECO:0000255}.
P01303	NPY	GO:0004930; GO:0001664; GO:0007187; GO:0005794; GO:0008343; GO:0019731; GO:0019732; GO:0007610; GO:0008015; GO:0005246; GO:0006816; GO:0005623; GO:0008283; GO:0021954; GO:0021987; GO:0050829; GO:0050830; GO:0007586; GO:0005576; GO:0005615; GO:0007631; GO:0045087; GO:0006928; GO:0031175; GO:0005184; GO:0007218; GO:0032100; GO:0005102; GO:0032098; GO:0008217; GO:0001878; GO:0007268	Evidence at protein level	SUBCELLULAR LOCATION: Secreted.			SIGNAL 1 28 {ECO:0000269|PubMed:6589611}.
P01138	NGF	GO:0005796; GO:0000186; GO:0006919; GO:0007267; GO:0016023; GO:0005768; GO:0005576; GO:0008625; GO:0008083; GO:0008191; GO:0007018; GO:0043066; GO:0043154; GO:0043524; GO:0032455; GO:0005163; GO:0048812; GO:0048011; GO:0048015; GO:0043065; GO:0050772; GO:0010628; GO:0043281; GO:0045664; GO:0007169	Evidence at protein level	SUBCELLULAR LOCATION: Secreted.			SIGNAL 1 18 {ECO:0000255}.
O95897	OLFM2	GO:0032281; GO:0030054; GO:0005737; GO:0005576; GO:0007626; GO:0005634; GO:0051152; GO:0009306; GO:0097060; GO:0007601	Evidence at protein level	SUBCELLULAR LOCATION: Secreted {ECO:0000269|PubMed:21228389}. Cell junction, synapse {ECO:0000250|UniProtKB:Q8BM13}. Membrane {ECO:0000250|UniProtKB:Q8BM13}. Nucleus {ECO:0000269|PubMed:25298399}. Cytoplasm {ECO:0000269|PubMed:25298399}. Note=Nuclear localization is induced by TGF-beta. {ECO:0000269|PubMed:25298399}.			SIGNAL 1 20 {ECO:0000255}.
Q96PB7	OLFM3	GO:0032281; GO:0005794; GO:0030054; GO:0005615; GO:0042462; GO:0045202	Evidence at protein level	SUBCELLULAR LOCATION: Secreted {ECO:0000250}. Cell junction, synapse {ECO:0000250}.			SIGNAL 1 23 {ECO:0000255}.
Q99748	NRTN	GO:0000165; GO:0005088; GO:0030424; GO:0005576; GO:0005622; GO:0021675; GO:0007399; GO:0001755; GO:0031175; GO:0005102; GO:0007169	Evidence at protein level	SUBCELLULAR LOCATION: Secreted.			SIGNAL 1 19 {ECO:0000255}.
Q9NPE2	NGRN	GO:0005576; GO:0030182; GO:0005634; GO:0044822	Evidence at protein level	SUBCELLULAR LOCATION: Nucleus {ECO:0000269|PubMed:11118320}. Secreted {ECO:0000305}.			SIGNAL 1 15 {ECO:0000255}.
P48645	NMU	GO:0007186; GO:0007586; GO:0042755; GO:0005576; GO:0001696; GO:0007218; GO:0009648; GO:0046887; GO:0045987; GO:0050806; GO:0005102; GO:0006940; GO:0019233; GO:0007165; GO:0043195	Evidence at protein level	SUBCELLULAR LOCATION: Secreted.			SIGNAL 1 34 {ECO:0000255}.
Q9HCQ7	NPVF	GO:0005576; GO:0032277; GO:0007218	Evidence at protein level	SUBCELLULAR LOCATION: Secreted.			SIGNAL 1 26 {ECO:0000255}.
Q8NG41	NPB	GO:0007186; GO:0005576; GO:0007218	Evidence at protein level	SUBCELLULAR LOCATION: Secreted.			SIGNAL 1 24 {ECO:0000255}.
Q8N729	NPW	GO:0007186; GO:0005576; GO:0007631; GO:0007218	Evidence at protein level	SUBCELLULAR LOCATION: Secreted.			SIGNAL 1 32 {ECO:0000255}.
P20783	NTF3	GO:0090630; GO:0000187; GO:0032148; GO:0007267; GO:0042056; GO:0016023; GO:0005576; GO:0008083; GO:0050930; GO:0050804; GO:0042552; GO:0043524; GO:0050732; GO:0007399; GO:0048812; GO:0005166; GO:2000251; GO:0030335; GO:0008284; GO:0045687; GO:0033138; GO:0050731; GO:0002092; GO:0005102; GO:0042981; GO:0045664; GO:0007165; GO:0007169	Evidence at protein level	SUBCELLULAR LOCATION: Secreted.			SIGNAL 1 18 {ECO:0000255}.
Q96S42	NODAL	GO:0030509; GO:0060395; GO:0048327; GO:0007420; GO:0042074; GO:0005125; GO:0048546; GO:0048701; GO:0009880; GO:0001892; GO:0060136; GO:0035987; GO:0060802; GO:0005615; GO:0033505; GO:0048859; GO:0001947; GO:0002085; GO:0060460; GO:0001889; GO:0001893; GO:0060137; GO:0048382; GO:0016015; GO:0060766; GO:0010721; GO:1901383; GO:0000122; GO:1901164; GO:0001842; GO:1900164; GO:0001890; GO:0010085; GO:…	Evidence at protein level	SUBCELLULAR LOCATION: Secreted {ECO:0000250}.			SIGNAL 1 26 {ECO:0000255}.
P34130	NTF4	GO:0008344; GO:0007267; GO:0016023; GO:0005788; GO:0008544; GO:0005576; GO:0007402; GO:0008083; GO:0060384; GO:0007616; GO:0042490; GO:0043524; GO:0048812; GO:0005166; GO:0045664; GO:0008052; GO:0061193; GO:0007169	Evidence at protein level	SUBCELLULAR LOCATION: Secreted.			SIGNAL 1 24 {ECO:0000255}.
P80303	NUCB2	GO:0003677; GO:0005794; GO:0005509; GO:0005829; GO:0005783; GO:0005793; GO:0070062; GO:0005615; GO:0005635; GO:0005886	Evidence at protein level	SUBCELLULAR LOCATION: Golgi apparatus {ECO:0000269|PubMed:11749975}. Membrane {ECO:0000269|PubMed:11749975}; Peripheral membrane protein {ECO:0000269|PubMed:11749975}. Cytoplasm {ECO:0000269|PubMed:11749975}. Secreted {ECO:0000269|PubMed:11749975}. Endoplasmic reticulum {ECO:0000250}. Nucleus envelope {ECO:0000250}. Note=Golgi retention is mediated by its N-terminal region.; SUBCELLULAR LOCATION:…			SIGNAL 1 24 {ECO:0000244|PubMed:25944712, ECO:0000255}.
P47972	NPTX2	GO:0008306; GO:0030246; GO:0005576; GO:0046872; GO:0007268	Evidence at protein level	SUBCELLULAR LOCATION: Secreted {ECO:0000250}.			SIGNAL 1 15 {ECO:0000255}.
Q02818	NUCB1	GO:0003677; GO:0005794; GO:0032580; GO:0005798; GO:0005509; GO:0005801; GO:0005769; GO:0005793; GO:0070062; GO:0005615; GO:0090498; GO:0098547; GO:0016020; GO:0015630; GO:0005634; GO:1903533; GO:0072718; GO:0005791; GO:0005802	Evidence at protein level	SUBCELLULAR LOCATION: Golgi apparatus, cis-Golgi network membrane {ECO:0000250|UniProtKB:Q63083}; Peripheral membrane protein {ECO:0000250|UniProtKB:Q63083}; Lumenal side {ECO:0000250|UniProtKB:Q63083}. Cytoplasm {ECO:0000250|UniProtKB:Q63083}. Secreted {ECO:0000250|UniProtKB:Q63083}. Note=A small fraction of the protein may be cytoplasmic. {ECO:0000250|UniProtKB:Q63083}.			SIGNAL 1 26 {ECO:0000255}.
Q9NY56	OBP2A	GO:0005576; GO:0005549; GO:0050896; GO:0007606; GO:0007608; GO:0006810	Evidence at protein level	SUBCELLULAR LOCATION: Secreted {ECO:0000305}.			SIGNAL 1 15 {ECO:0000255}.
Q9UBM4	OPTC	GO:0005201; GO:0005578	Evidence at protein level	SUBCELLULAR LOCATION: Secreted, extracellular space, extracellular matrix {ECO:0000250}.			SIGNAL 1 19 {ECO:0000250}.
O95157	NXPH3	GO:0005576; GO:0007218	Evidence at protein level	SUBCELLULAR LOCATION: Secreted {ECO:0000305}.			SIGNAL 1 22 {ECO:0000269|PubMed:15340161}.
Q6UX06	OLFM4	GO:0045296; GO:0003824; GO:0007155; GO:0070062; GO:0005615; GO:0005739; GO:0048471; GO:0005886; GO:1900026; GO:0042803; GO:0051260; GO:0042581	Evidence at protein level	SUBCELLULAR LOCATION: Secreted, extracellular space. Mitochondrion. Note=Subcellular location is not clearly defined: has been shown to be secreted (PubMed:16566923), but also in the mitochondrion (PubMed:15059901 and PubMed:20724538), cytoplasm and plasma membrane (PubMed:20724538) and in the nucleus (PubMed:15059901). {ECO:0000269|PubMed:15059901, ECO:0000269|PubMed:16566923, ECO:0000269|PubMed…			SIGNAL 1 20 {ECO:0000255}.
Q32P28	P3H1	GO:0031418; GO:0060348; GO:0061077; GO:0032963; GO:0005783; GO:0005788; GO:0070062; GO:0005506; GO:0032991; GO:0016020; GO:0008285; GO:1901874; GO:0019797; GO:0032403; GO:0006457; GO:0018126; GO:0050821; GO:0005578; GO:0050708	Evidence at protein level	SUBCELLULAR LOCATION: Isoform 1: Endoplasmic reticulum.; SUBCELLULAR LOCATION: Secreted, extracellular space, extracellular matrix {ECO:0000250}. Note=Secreted into the extracellular matrix as a chondroitin sulfate proteoglycan (CSPG). {ECO:0000269|PubMed:19088120}.			SIGNAL 1 22 {ECO:0000255}.
Q6UWY5	OLFML1	GO:0005576	Evidence at protein level	SUBCELLULAR LOCATION: Secreted {ECO:0000269|PubMed:18708057}.			SIGNAL 1 28 {ECO:0000269|PubMed:15340161}.
P02818	BGLAP	GO:0006888; GO:0005796; GO:0060348; GO:0030282; GO:0005509; GO:0007155; GO:0007569; GO:0071363; GO:0071305; GO:0005737; GO:0030425; GO:0005788; GO:0005615; GO:0046848; GO:0031988; GO:0042476; GO:0002076; GO:0001649; GO:0017187; GO:0043204; GO:0030500; GO:0045124; GO:0045670; GO:0014823; GO:0042493; GO:0043627; GO:0045471; GO:0051384; GO:0009629; GO:0033594; GO:0009612; GO:0033574; GO:0033280; GO:…	Evidence at protein level	SUBCELLULAR LOCATION: Secreted.			SIGNAL 1 23 {ECO:0000305}.
Q6ZRI0	OTOG	GO:0046373; GO:0008344; GO:0046556; GO:0016324; GO:0005615; GO:0007605; GO:0005198	Evidence at protein level	SUBCELLULAR LOCATION: Apical cell membrane {ECO:0000250|UniProtKB:O55225}; Peripheral membrane protein {ECO:0000250|UniProtKB:O55225}; Extracellular side {ECO:0000250|UniProtKB:O55225}. Secreted, extracellular space {ECO:0000250|UniProtKB:O55225}. Note=Found in fiber-like structures during the maturation process of the tectorial membrane. {ECO:0000250|UniProtKB:O55225}.			SIGNAL 1 22 {ECO:0000255}.
Q9UNK4	PLA2G2D	GO:0002361; GO:0005509; GO:0005576; GO:0008201; GO:0006954; GO:0016042; GO:0042130; GO:0006654; GO:0036151; GO:0036152; GO:0036148; GO:0036149; GO:0036150; GO:0004623; GO:0006644	Evidence at protein level	SUBCELLULAR LOCATION: Secreted {ECO:0000305}.			SIGNAL 1 20 {ECO:0000255}.
Q9BSG0	PRADC1	GO:0070062; GO:0005576	Evidence at protein level	SUBCELLULAR LOCATION: Secreted {ECO:0000269|PubMed:15498570}.			SIGNAL 1 21 {ECO:0000255}.
Q9GZU5	NYX	GO:0019221; GO:0005737; GO:0005622; GO:0046426; GO:0006469; GO:0004860; GO:0005578; GO:0007601	Evidence at protein level	SUBCELLULAR LOCATION: Secreted, extracellular space, extracellular matrix {ECO:0000250}.			SIGNAL 1 23 {ECO:0000255}.
A1E959	ODAM	GO:0031214; GO:0071944; GO:0044267; GO:0005737; GO:0005576; GO:0005615; GO:0043205; GO:0006954; GO:0005634; GO:0042475; GO:0043547; GO:0060054; GO:0010628; GO:0001934; GO:0032956	Evidence at protein level	SUBCELLULAR LOCATION: Secreted {ECO:0000250|UniProtKB:Q3HS83}. Cytoplasm {ECO:0000269|PubMed:25911094}. Nucleus {ECO:0000269|PubMed:25911094}.			SIGNAL 1 15 {ECO:0000255}.
Q13093	PLA2G7	GO:0003847; GO:0047499; GO:0005737; GO:0005576; GO:0016788; GO:0016042; GO:0034440; GO:0034362; GO:0034374; GO:0005543; GO:0034441; GO:0050729; GO:0090026	Evidence at protein level	SUBCELLULAR LOCATION: Secreted, extracellular space.			SIGNAL 1 21
P01298	PPY	GO:0001664; GO:0007267; GO:0005737; GO:0007586; GO:0005576; GO:0005615; GO:0007631; GO:0005179; GO:0098779; GO:0005184; GO:0007218; GO:0002230; GO:0009306; GO:0005102; GO:0032098; GO:0098792	Evidence at protein level	SUBCELLULAR LOCATION: Secreted.			SIGNAL 1 29
Q9NZK7	PLA2G2E	GO:0005509; GO:0005576; GO:0006954; GO:0016042; GO:0006654; GO:0036151; GO:0036152; GO:0036148; GO:0036149; GO:0036150; GO:0004623; GO:0006644	Evidence at protein level	SUBCELLULAR LOCATION: Secreted.			SIGNAL 1 19 {ECO:0000255}.
Q8NCC3	PLA2G15	GO:0008374; GO:0047499; GO:0006672; GO:0070062; GO:0005615; GO:0009062; GO:0006650; GO:0004622; GO:0005764; GO:0016020; GO:0005739; GO:0034638; GO:0046338; GO:0005543	Evidence at protein level	SUBCELLULAR LOCATION: Lysosome {ECO:0000269|PubMed:23958596}. Secreted {ECO:0000269|PubMed:10092508, ECO:0000269|PubMed:20410020}. Membrane {ECO:0000269|PubMed:25727495}; Peripheral membrane protein {ECO:0000269|PubMed:25727495}.			SIGNAL 1 33 {ECO:0000269|PubMed:10092508, ECO:0000269|PubMed:15340161}.
Q99983	OMD	GO:0005796; GO:0007155; GO:0070062; GO:0005576; GO:0005615; GO:0018146; GO:0042340; GO:0043202; GO:0005578; GO:0030500	Evidence at protein level	SUBCELLULAR LOCATION: Secreted, extracellular space, extracellular matrix {ECO:0000250}.			SIGNAL 1 20 {ECO:0000255}.
P13725	OSM	GO:0048266; GO:0008283; GO:0005125; GO:0005576; GO:0005615; GO:0008083; GO:0006955; GO:0005622; GO:0007275; GO:0008285; GO:0046888; GO:0045835; GO:0005147; GO:0038165; GO:0007422; GO:0043410; GO:0002675; GO:2001235; GO:0051781; GO:0008284; GO:0033138; GO:0050731; GO:0045944; GO:0042517; GO:0040008; GO:0009408; GO:0042508; GO:0042503; GO:0042506	Evidence at protein level	SUBCELLULAR LOCATION: Secreted.			SIGNAL 1 25 {ECO:0000269|PubMed:1542792, ECO:0000269|PubMed:3540948}.
P04054	PLA2G1B	GO:0007015; GO:0000187; GO:0032431; GO:0019731; GO:0050482; GO:0032052; GO:0005509; GO:0047498; GO:0009986; GO:0032869; GO:0050830; GO:0005576; GO:0005615; GO:0006633; GO:0015758; GO:0002227; GO:0032637; GO:0035556; GO:0019370; GO:0044240; GO:0030593; GO:0002446; GO:0006654; GO:0036151; GO:0046470; GO:0036152; GO:0036148; GO:0036149; GO:0036150; GO:0004623; GO:0045740; GO:0051092; GO:0010524; GO:…	Evidence at protein level	SUBCELLULAR LOCATION: Secreted {ECO:0000269|PubMed:19297324}. Note=secreted from pancreatic acinar cells in its inactive form.			SIGNAL 1 15 {ECO:0000269|PubMed:7060561}.
P14555	PLA2G2A	GO:0005509; GO:0047498; GO:0050830; GO:0005783; GO:0005789; GO:0070062; GO:0005576; GO:0005615; GO:0016042; GO:0034374; GO:0048471; GO:0006654; GO:0046473; GO:0036151; GO:0036152; GO:0036148; GO:0036149; GO:0036150; GO:0004623; GO:0005543; GO:0006644; GO:0070374; GO:0050729; GO:0010744; GO:0030141	Evidence at protein level	SUBCELLULAR LOCATION: Cell membrane {ECO:0000305}; Peripheral membrane protein {ECO:0000269|PubMed:2775276}. Secreted {ECO:0000269|PubMed:2925608, ECO:0000269|PubMed:2925633}.			SIGNAL 1 20 {ECO:0000269|PubMed:2775276, ECO:0000269|PubMed:2925633, ECO:0000269|PubMed:3202859, ECO:0000269|PubMed:3240982, ECO:0000269|PubMed:8399335}.
O15496	PLA2G10	GO:0019369; GO:0007411; GO:0005509; GO:0042632; GO:0005576; GO:0016042; GO:0051977; GO:0090370; GO:0043433; GO:0006654; GO:0036151; GO:0036152; GO:0036148; GO:0036149; GO:0036150; GO:0004623; GO:0004620; GO:0090238; GO:0032270; GO:0010884; GO:0010744; GO:0032308; GO:0043030	Evidence at protein level	SUBCELLULAR LOCATION: Secreted.			SIGNAL 1 31 {ECO:0000255}.
Q6UXH9	PAMR1	GO:0005509; GO:0005576	Evidence at protein level	SUBCELLULAR LOCATION: Secreted {ECO:0000305}.			SIGNAL 1 21 {ECO:0000255}.
Q9BZM2	PLA2G2F	GO:0005509; GO:0005829; GO:0005576; GO:0016042; GO:0042130; GO:0006654; GO:0036151; GO:0036152; GO:0036148; GO:0036149; GO:0036150; GO:0004623	Evidence at protein level	SUBCELLULAR LOCATION: Secreted {ECO:0000269|PubMed:11112443}.			SIGNAL 1 20 {ECO:0000255}.
Q8WXA2	PATE1	GO:0005576	Evidence at protein level	SUBCELLULAR LOCATION: Secreted {ECO:0000305}.			SIGNAL 1 21 {ECO:0000255}.
Q8NBP7	PCSK9	GO:0030134; GO:0005794; GO:1990667; GO:1990666; GO:0034185; GO:0034190; GO:0006915; GO:0009986; GO:0032869; GO:0009267; GO:0042632; GO:0008203; GO:0005737; GO:0005769; GO:0005783; GO:0005615; GO:0031232; GO:0001822; GO:0005770; GO:0042157; GO:0001889; GO:0030169; GO:0050750; GO:0032802; GO:0007041; GO:0005764; GO:0010989; GO:2000272; GO:0001920; GO:2000650; GO:0022008; GO:0030182; GO:0048471; GO:…	Evidence at protein level	SUBCELLULAR LOCATION: Cytoplasm. Secreted. Endosome. Lysosome. Cell surface. Endoplasmic reticulum. Golgi apparatus. Note=Autocatalytic cleavage is required to transport it from the endoplasmic reticulum to the Golgi apparatus and for the secretion of the mature protein. Localizes to the endoplasmic reticulum in the absence of LDLR and colocalizes to the cell surface and to the endosomes/lysosome…			SIGNAL 1 30 {ECO:0000269|PubMed:12552133}.
Q8IYS5	OSCAR	GO:0070062; GO:0005576; GO:0016021; GO:0005886; GO:0050776	Evidence at protein level	SUBCELLULAR LOCATION: Isoform 1: Secreted {ECO:0000305}.; SUBCELLULAR LOCATION: Isoform 2: Cell membrane {ECO:0000305}; Single-pass type I membrane protein {ECO:0000305}.			SIGNAL 1 18 {ECO:0000255}.
P10451	SPP1	GO:0031214; GO:0007155; GO:0042995; GO:0046697; GO:0007566; GO:0070062; GO:0050840; GO:0022617; GO:0030198; GO:0005576; GO:0005615; GO:0006954; GO:0031988; GO:0048685; GO:0001649; GO:0048471; GO:0045780; GO:0048545; GO:0033280	Evidence at protein level	SUBCELLULAR LOCATION: Secreted.			SIGNAL 1 16 {ECO:0000255}.
Q9NRC9	OTOR	GO:0001502; GO:0005576; GO:0007605	Evidence at protein level	SUBCELLULAR LOCATION: Secreted {ECO:0000305}.			SIGNAL 1 17 {ECO:0000269|PubMed:15340161}.
P39877	PLA2G5	GO:0005794; GO:0050482; GO:0005509; GO:0047498; GO:0005576; GO:0008201; GO:0019370; GO:0016042; GO:0048471; GO:0006654; GO:0036151; GO:0036152; GO:0036148; GO:0036149; GO:0036150; GO:0004623; GO:0006644; GO:0005886; GO:0006663; GO:0070374; GO:0010518; GO:0051591; GO:0034097	Evidence at protein level	SUBCELLULAR LOCATION: Secreted.			SIGNAL 1 20 {ECO:0000255}.
P09466	PAEP	GO:0006915; GO:0005576; GO:0007275; GO:0032725; GO:2000667; GO:2000778; GO:0036094; GO:0006810	Evidence at protein level	SUBCELLULAR LOCATION: Secreted.			SIGNAL 1 18 {ECO:0000269|PubMed:11278680, ECO:0000269|PubMed:3569148, ECO:0000269|PubMed:3667877}.
P29122	PCSK6	GO:0005796; GO:0009986; GO:0007368; GO:0004175; GO:0005783; GO:0031012; GO:0005615; GO:0009100; GO:0008201; GO:0016020; GO:0048406; GO:0032455; GO:0032902; GO:0016486; GO:0016485; GO:0030510; GO:0032940; GO:0004252; GO:0007354	Evidence at protein level	SUBCELLULAR LOCATION: Isoform PACE4A-I: Secreted.; SUBCELLULAR LOCATION: Isoform PACE4A-II: Secreted.; SUBCELLULAR LOCATION: Isoform PACE4C: Endoplasmic reticulum. Note=Not secreted, remains probably in zymogen form in endoplasmic reticulum.; SUBCELLULAR LOCATION: Isoform PACE4CS: Endoplasmic reticulum. Note=Not secreted, remains probably in zymogen form in endoplasmic reticulum.; SUBCELLULAR LOC…			SIGNAL 1 63 {ECO:0000255}.
Q9NRA1	PDGFC	GO:0000139; GO:0007171; GO:0007596; GO:0060348; GO:0009986; GO:0071230; GO:0007417; GO:0005737; GO:0005829; GO:0048565; GO:0009790; GO:0005788; GO:0070062; GO:0005576; GO:0005615; GO:0005634; GO:0009887; GO:0005886; GO:0005161; GO:0048008; GO:0045740; GO:0070374; GO:0043406; GO:0051781; GO:0030335; GO:0048146; GO:0014068; GO:0031954; GO:0042803; GO:0050730	Evidence at protein level	SUBCELLULAR LOCATION: Cytoplasm, cytosol {ECO:0000269|PubMed:16443219}. Secreted {ECO:0000269|PubMed:10806482, ECO:0000269|PubMed:10858496, ECO:0000269|PubMed:11297552, ECO:0000269|PubMed:15061151, ECO:0000269|PubMed:15372073, ECO:0000269|PubMed:15911618}. Nucleus {ECO:0000269|PubMed:16443219}. Cytoplasmic granule {ECO:0000269|PubMed:15061151}. Cell membrane {ECO:0000269|PubMed:16443219}. Note=Su…			SIGNAL 1 22 {ECO:0000255}.
Q9NZ20	PLA2G3	GO:0001675; GO:0047498; GO:0005814; GO:0060271; GO:0005576; GO:0005615; GO:0016042; GO:0019372; GO:0043303; GO:0042629; GO:0046872; GO:0036151; GO:0036152; GO:0036148; GO:0004623; GO:0006644; GO:0005886; GO:0007288	Evidence at protein level	SUBCELLULAR LOCATION: Secreted. Cell membrane. Cytoplasm, cytoskeleton, microtubule organizing center, centrosome, centriole.			SIGNAL 1 19 {ECO:0000255}.
P18509	ADCYAP1	GO:0046034; GO:0007190; GO:0001662; GO:0019933; GO:0007267; GO:0071385; GO:0005576; GO:0005615; GO:0007565; GO:0001821; GO:0005622; GO:0034260; GO:0002865; GO:0002878; GO:0045786; GO:0060253; GO:0010656; GO:0043267; GO:0031175; GO:0005184; GO:0007218; GO:0001541; GO:0051428; GO:0016521; GO:0021983; GO:0070374; GO:0043547; GO:0010579; GO:0008284; GO:0071651; GO:0007204; GO:0060124; GO:0032755; GO:…	Evidence at protein level	SUBCELLULAR LOCATION: Secreted.			SIGNAL 1 24 {ECO:0000255}.
P05121	SERPINE1	GO:0001525; GO:0071222; GO:0001300; GO:0007623; GO:0050829; GO:0070062; GO:0031012; GO:0030198; GO:0005576; GO:0005615; GO:0042730; GO:0030195; GO:0033629; GO:0030336; GO:0010951; GO:2000352; GO:1902042; GO:0051918; GO:0010757; GO:0014912; GO:2000098; GO:0061044; GO:0061045; GO:0005886; GO:0031093; GO:0002576; GO:0045766; GO:0030194; GO:0050729; GO:0032757; GO:0035491; GO:0090026; GO:0048260; GO:…	Evidence at protein level	SUBCELLULAR LOCATION: Secreted.			SIGNAL 1 23
Q9BXP8	PAPPA2	GO:0060349; GO:0044267; GO:0070062; GO:0005576; GO:0005622; GO:0004222; GO:0008237; GO:0006508; GO:0001558; GO:0008270	Evidence at protein level	SUBCELLULAR LOCATION: Secreted {ECO:0000250}.			SIGNAL 1 22 {ECO:0000255}.
Q9GZP0	PDGFD	GO:0000139; GO:0007596; GO:0071230; GO:0070301; GO:0036120; GO:0071560; GO:0005788; GO:0070062; GO:0005576; GO:0005615; GO:0007275; GO:0005161; GO:0048008; GO:0070374; GO:0043406; GO:0051781; GO:0030335; GO:0008284; GO:0048146; GO:0072126; GO:2000439; GO:0014068; GO:0031954; GO:0071673; GO:0048661; GO:0050730	Evidence at protein level	SUBCELLULAR LOCATION: Secreted {ECO:0000269|PubMed:11331882}. Note=Released by platelets upon wounding.			SIGNAL 1 18 {ECO:0000255}.
P05120	SERPINB2	GO:0005737; GO:0005576; GO:0005615; GO:0042730; GO:0043066; GO:0005886; GO:0004867; GO:0042060	Evidence at protein level	SUBCELLULAR LOCATION: Cytoplasm. Secreted, extracellular space.			SIGNAL 1 ? Not cleaved.
P01210	PENK	GO:0002118; GO:0007568; GO:0043679; GO:0001662; GO:0070852; GO:0071320; GO:0034599; GO:0071560; GO:0098586; GO:0071305; GO:0030425; GO:0005576; GO:0051867; GO:0014009; GO:0035641; GO:0043025; GO:0005184; GO:0007218; GO:0031628; GO:0001649; GO:0043204; GO:0005886; GO:2000987; GO:0051592; GO:0071871; GO:0032355; GO:0045471; GO:0001666; GO:0032496; GO:0043278; GO:0035094; GO:0009314; GO:0009636; GO:…	Evidence at protein level	SUBCELLULAR LOCATION: Secreted.			SIGNAL 1 24 {ECO:0000255}.
P10720	PF4V1	GO:0045236; GO:0007186; GO:0008009; GO:0070098; GO:0005615; GO:0008201; GO:0006955; GO:0006954; GO:0030595; GO:0030168; GO:0002690; GO:0042127; GO:0032496	Evidence at protein level	SUBCELLULAR LOCATION: Secreted.			SIGNAL 1 30 {ECO:0000269|PubMed:15459074}.
Q15113	PCOLCE	GO:0005518; GO:0070062; GO:0005615; GO:0008201; GO:0007275; GO:0016504; GO:0006508	Evidence at protein level	SUBCELLULAR LOCATION: Secreted.			SIGNAL 1 25 {ECO:0000255}.
Q9UHG2	PCSK1N	GO:0004866; GO:0070062; GO:0005615; GO:0007218; GO:0016486; GO:0005102; GO:0009409; GO:0002021; GO:0030141; GO:0004867; GO:0005802	Evidence at protein level	SUBCELLULAR LOCATION: Secreted {ECO:0000250|UniProtKB:Q9QXV0}. Golgi apparatus, trans-Golgi network {ECO:0000250|UniProtKB:Q9QXV0}. Note=A N-terminal processed peptide, probably Big SAAS or Little SAAS, is accumulated in cytoplasmic protein tau deposits in frontotemporal dementia and parkinsonism linked to chromosome 17 (Pick disease), Alzheimer disease and amyotrophic lateral sclerosis-parkinson…			SIGNAL 1 33 {ECO:0000255}.
P01127	PDGFB	GO:0006260; GO:0000139; GO:0000165; GO:0005088; GO:0032148; GO:0032147; GO:0016323; GO:0060326; GO:0016049; GO:0009986; GO:0071363; GO:0071506; GO:0042056; GO:0005518; GO:0005737; GO:0001892; GO:0005788; GO:0030198; GO:0005576; GO:0005615; GO:0008083; GO:0007507; GO:0042802; GO:0072255; GO:0002548; GO:0010629; GO:0010512; GO:0010544; GO:0032091; GO:0045892; GO:1905064; GO:0038001; GO:0018105; GO:…	Evidence at protein level	SUBCELLULAR LOCATION: Secreted. Note=Released by platelets upon wounding.			SIGNAL 1 20
P36955	SERPINF1	GO:0007568; GO:0043203; GO:0005604; GO:0008283; GO:0071279; GO:0071549; GO:0071333; GO:0071300; GO:0070062; GO:0005576; GO:0005615; GO:0001822; GO:0042470; GO:0007275; GO:0016525; GO:0010596; GO:0060770; GO:0010629; GO:0050728; GO:1901215; GO:0042698; GO:0048471; GO:0050769; GO:0010976; GO:0010447; GO:0046685; GO:0060041; GO:0004867; GO:0007614	Evidence at protein level	SUBCELLULAR LOCATION: Secreted {ECO:0000269|PubMed:17081065}. Melanosome {ECO:0000269|PubMed:17081065}. Note=Enriched in stage I melanosomes.			SIGNAL 1 19
P14222	PRF1	GO:0006915; GO:0005509; GO:0006968; GO:0019835; GO:0044194; GO:0016023; GO:0002357; GO:0051607; GO:0031904; GO:0005576; GO:0002418; GO:0001771; GO:0016021; GO:0016020; GO:0005886; GO:0051260; GO:0022829	Evidence at protein level	SUBCELLULAR LOCATION: Cytoplasmic granule lumen. Secreted. Cell membrane; Multi-pass membrane protein. Endosome lumen. Note=Stored in cytoplasmic granules of cytolytic T-lymphocytes and secreted into the cleft between T-lymphocyte and target cell. Inserts into the cell membrane of target cells and forms pores. Membrane insertion and pore formation requires a major conformation change. May be take…			SIGNAL 1 21
Q13219	PAPPA	GO:0044267; GO:0005576; GO:0007565; GO:0004222; GO:0008237; GO:0008270	Evidence at protein level	SUBCELLULAR LOCATION: Secreted {ECO:0000269|PubMed:10077652}.			SIGNAL 1 22 {ECO:0000255}.
Q8NBM8	PCYOX1L	GO:0005576; GO:0016020; GO:0030327; GO:0030328; GO:0001735; GO:0005774	Evidence at protein level	SUBCELLULAR LOCATION: Secreted.			SIGNAL 1 22 {ECO:0000269|PubMed:15340161}.
P22079	LPO	GO:0016323; GO:0005737; GO:0042742; GO:0001580; GO:0070062; GO:0005615; GO:0020037; GO:0042744; GO:0046872; GO:0006979; GO:0036393	Evidence at protein level	SUBCELLULAR LOCATION: Secreted {ECO:0000269|PubMed:12626341}.			SIGNAL 1 26 {ECO:0000255}.
Q9BZM1	PLA2G12A	GO:0005794; GO:0005509; GO:0047498; GO:0005783; GO:0005576; GO:0016042; GO:0006654; GO:0036151; GO:0036152; GO:0036148; GO:0036149; GO:0036150; GO:0004623	Evidence at protein level	SUBCELLULAR LOCATION: Secreted {ECO:0000269|PubMed:12522102}. Cytoplasm {ECO:0000269|PubMed:12522102}.			SIGNAL 1 22 {ECO:0000305}.
O75594	PGLYRP1	GO:0008745; GO:0050830; GO:0016045; GO:0070062; GO:0005576; GO:0044117; GO:0006955; GO:0045087; GO:0050728; GO:0032689; GO:0032827; GO:0042834; GO:0009253; GO:0016019; GO:0008270	Evidence at protein level	SUBCELLULAR LOCATION: Secreted {ECO:0000269|PubMed:16354652}. Cytoplasmic granule {ECO:0000250}.			SIGNAL 1 21 {ECO:0000255}.
Q96LB9	PGLYRP3	GO:0008745; GO:0050830; GO:0016045; GO:0005576; GO:0044117; GO:0045087; GO:0005622; GO:0016020; GO:0032689; GO:0032827; GO:0042834; GO:0009253; GO:0016019; GO:0008270	Evidence at protein level	SUBCELLULAR LOCATION: Secreted {ECO:0000269|PubMed:16354652}.			SIGNAL 1 17 {ECO:0000255}.
Q96LB8	PGLYRP4	GO:0008745; GO:0050830; GO:0016045; GO:0005576; GO:0045087; GO:0005622; GO:0016020; GO:0042834; GO:0009253; GO:0016019; GO:0008270	Evidence at protein level	SUBCELLULAR LOCATION: Secreted {ECO:0000269|PubMed:16354652}.			SIGNAL 1 17 {ECO:0000255}.
P80108	GPLD1	GO:0006507; GO:0002042; GO:0071277; GO:0071397; GO:0035690; GO:0032869; GO:0071467; GO:0071401; GO:0002062; GO:0002430; GO:0005737; GO:0070062; GO:0005615; GO:0004621; GO:0035701; GO:0097241; GO:0008286; GO:0005622; GO:0043231; GO:0005765; GO:0008285; GO:0010897; GO:0001503; GO:0046470; GO:0004630; GO:0010694; GO:0043065; GO:0045919; GO:0010595; GO:0010907; GO:0010983; GO:0035774; GO:0051044; GO:…	Evidence at protein level	SUBCELLULAR LOCATION: Secreted.			SIGNAL 1 23
P04085	PDGFA	GO:0000139; GO:0000165; GO:0005088; GO:0030036; GO:0001525; GO:0001775; GO:0030031; GO:0009986; GO:0007267; GO:0005518; GO:1990401; GO:0005788; GO:0030198; GO:0005576; GO:0005615; GO:0008083; GO:0001942; GO:0048839; GO:0048286; GO:0005902; GO:0050919; GO:0010512; GO:0010544; GO:0009887; GO:0046934; GO:0048015; GO:0031093; GO:0002576; GO:0048407; GO:0005161; GO:0048008; GO:0045740; GO:0070374; GO:…	Evidence at protein level	SUBCELLULAR LOCATION: Secreted. Note=Released by platelets upon wounding.			SIGNAL 1 20
P07237	P4HB	GO:0045454; GO:0071456; GO:0005783; GO:0034663; GO:0005788; GO:0005793; GO:0009897; GO:0070062; GO:0005576; GO:0005925; GO:0005178; GO:0042158; GO:0042470; GO:0018401; GO:0044822; GO:0046598; GO:0004656; GO:0016222; GO:0003756; GO:0006457; GO:0046982; GO:1902175; GO:0034976; GO:0000302	Evidence at protein level	SUBCELLULAR LOCATION: Endoplasmic reticulum {ECO:0000269|PubMed:23475612}. Endoplasmic reticulum lumen {ECO:0000269|PubMed:10636893, ECO:0000269|PubMed:23475612}. Melanosome {ECO:0000269|PubMed:12643545, ECO:0000269|PubMed:17081065}. Cell membrane {ECO:0000269|PubMed:21670307}; Peripheral membrane protein {ECO:0000305}. Note=Highly abundant. In some cell types, seems to be also secreted or associ…			SIGNAL 1 17 {ECO:0000244|PubMed:25944712, ECO:0000269|PubMed:12665801, ECO:0000269|PubMed:2079031, ECO:0000269|PubMed:9150948, ECO:0000269|Ref.10}.
P21810	BGN	GO:0005796; GO:0001974; GO:0009986; GO:0030206; GO:0030207; GO:0019221; GO:0005737; GO:0030208; GO:0070062; GO:0050840; GO:0030198; GO:0005201; GO:0005576; GO:0005539; GO:0030203; GO:0043202; GO:0046426; GO:0006469; GO:0019800; GO:0004860; GO:0005578; GO:0042383; GO:0030133	Evidence at protein level	SUBCELLULAR LOCATION: Secreted, extracellular space, extracellular matrix {ECO:0000250}.			SIGNAL 1 16 {ECO:0000250|UniProtKB:P47853}.
P07585	DCN	GO:0005796; GO:0007568; GO:0030206; GO:0030207; GO:0005589; GO:0019221; GO:0005737; GO:0030208; GO:0050840; GO:0022617; GO:0030198; GO:0005576; GO:0005615; GO:0005539; GO:0030203; GO:0001822; GO:0043202; GO:0046426; GO:0016525; GO:0010596; GO:0006469; GO:1900747; GO:0009887; GO:0019800; GO:0001890; GO:0044822; GO:0010508; GO:0016239; GO:0051901; GO:0090141; GO:0014068; GO:0045944; GO:0004860; GO:…	Evidence at protein level	SUBCELLULAR LOCATION: Secreted, extracellular space, extracellular matrix.			SIGNAL 1 16 {ECO:0000250|UniProtKB:Q01129}.
P01213	PDYN	GO:0043679; GO:0005737; GO:0030425; GO:0005576; GO:0043025; GO:0005184; GO:0007218; GO:0031628; GO:0005886; GO:0007600; GO:0007268	Evidence at protein level	SUBCELLULAR LOCATION: Secreted.			SIGNAL 1 20
Q15198	PDGFRL	GO:0005576; GO:0004992; GO:0005019	Evidence at protein level	SUBCELLULAR LOCATION: Secreted {ECO:0000305}.			SIGNAL 1 21 {ECO:0000255}.
P12273	PIP	GO:0019864; GO:0003779; GO:0016324; GO:0004190; GO:0001580; GO:0070062; GO:0005576; GO:0005615; GO:0001948; GO:0070233; GO:0005634; GO:0010628; GO:0046983; GO:0006508; GO:0002682; GO:0001895; GO:0055085	Evidence at protein level	SUBCELLULAR LOCATION: Secreted.			SIGNAL 1 28 {ECO:0000269|PubMed:2013294, ECO:0000269|PubMed:25946035}.
P20142	PGC	GO:0004190; GO:0007586; GO:0070062; GO:0005615; GO:0002803; GO:0030163; GO:0006508	Evidence at protein level	SUBCELLULAR LOCATION: Secreted.			SIGNAL 1 16 {ECO:0000269|PubMed:2515193, ECO:0000269|PubMed:6816595}.
P16112	ACAN	GO:0005796; GO:0030246; GO:0007155; GO:0007417; GO:0022617; GO:0030198; GO:0005201; GO:0005576; GO:0005540; GO:0018146; GO:0042340; GO:0043202; GO:0046872; GO:0005578; GO:0006508; GO:0001501	Evidence at protein level	SUBCELLULAR LOCATION: Secreted, extracellular space, extracellular matrix {ECO:0000250}.			SIGNAL 1 16 {ECO:0000269|PubMed:7574678}.
P02776	PF4	GO:0048248; GO:0007186; GO:0008009; GO:0070098; GO:0019221; GO:0005576; GO:0005615; GO:0008201; GO:0006955; GO:0006954; GO:0030595; GO:0045347; GO:0016525; GO:0045918; GO:2001240; GO:0045653; GO:0030168; GO:0031093; GO:0002576; GO:0030816; GO:0043950; GO:0010628; GO:0002690; GO:0010744; GO:0045651; GO:0045944; GO:0032760; GO:0042127; GO:0032496	Evidence at protein level	SUBCELLULAR LOCATION: Secreted.			SIGNAL 1 31 {ECO:0000269|PubMed:267922, ECO:0000269|PubMed:601757, ECO:0000269|PubMed:6445090, ECO:0000269|PubMed:7644496, ECO:0000269|PubMed:893407}.
Q9BX93	PLA2G12B	GO:0005509; GO:0005576; GO:0016042; GO:0004623	Evidence at protein level	SUBCELLULAR LOCATION: Secreted.			SIGNAL 1 19 {ECO:0000269|PubMed:15340161}.
P98160	HSPG2	GO:0005796; GO:0001525; GO:0005604; GO:0005509; GO:0044267; GO:0070062; GO:0031012; GO:0022617; GO:0030198; GO:0005576; GO:0005615; GO:0005925; GO:0006024; GO:0006027; GO:0030203; GO:0042157; GO:0043202; GO:0005886; GO:0008022; GO:0001523	Evidence at protein level	SUBCELLULAR LOCATION: Secreted, extracellular space, extracellular matrix, basement membrane.			SIGNAL 1 21 {ECO:0000255}.
Q5JTB6	PLAC9	GO:0005576	Evidence at protein level	SUBCELLULAR LOCATION: Secreted {ECO:0000305}.			SIGNAL 1 22 {ECO:0000255}.
P49763	PGF	GO:0001658; GO:0030154; GO:0007267; GO:0032870; GO:0005576; GO:0005615; GO:0007565; GO:0008083; GO:0008201; GO:0016020; GO:0031100; GO:0045766; GO:0051781; GO:0008284; GO:0001938; GO:0060688; GO:0042493; GO:0001666; GO:0007165; GO:0002040; GO:0048010	Evidence at protein level	SUBCELLULAR LOCATION: Secreted. Note=The three isoforms are secreted but PlGF-2 appears to remain cell attached unless released by heparin.			SIGNAL 1 18 {ECO:0000269|PubMed:7929268}.
P55058	PLTP	GO:0005576; GO:0005615; GO:0034375; GO:0008289; GO:0006629; GO:0006869; GO:0010875; GO:0030317; GO:0010189	Evidence at protein level	SUBCELLULAR LOCATION: Secreted.			SIGNAL 1 17 {ECO:0000269|PubMed:8132678}.
Q15166	PON3	GO:0018733; GO:0102007; GO:0019439; GO:0004063; GO:0004064; GO:0046395; GO:0046226; GO:0047856; GO:0070062; GO:0005615; GO:0043231; GO:0046872; GO:0032929; GO:0010124; GO:0042803; GO:0009605; GO:0009636	Evidence at protein level	SUBCELLULAR LOCATION: Secreted, extracellular space {ECO:0000250}.			SIGNAL 2 ? Not cleaved. {ECO:0000255}.
P00747	PLG	GO:0034185; GO:0007596; GO:0072562; GO:0009986; GO:0044267; GO:0070062; GO:0022617; GO:0005576; GO:0005615; GO:0031232; GO:0042730; GO:0008285; GO:2000048; GO:0010812; GO:0051918; GO:0005886; GO:0031093; GO:0002576; GO:0051919; GO:0019904; GO:0005102; GO:0004252; GO:0008236; GO:0048771	Evidence at protein level	SUBCELLULAR LOCATION: Secreted {ECO:0000269|PubMed:10077593, ECO:0000269|PubMed:14699093}. Note=Locates to the cell surface where it is proteolytically cleaved to produce the active plasmin. Interaction with HRG tethers it to the cell surface.			SIGNAL 1 19 {ECO:0000269|PubMed:122932, ECO:0000269|Ref.7}.
Q04118	PRB3	GO:0050829; GO:0005576	Evidence at protein level	SUBCELLULAR LOCATION: Secreted.			SIGNAL 1 16 {ECO:0000255}.
P51888	PRELP	GO:0005796; GO:0007569; GO:0070062; GO:0005201; GO:0005576; GO:0005615; GO:1903561; GO:0008201; GO:0018146; GO:0042340; GO:0043202; GO:0005578; GO:0001501	Evidence at protein level	SUBCELLULAR LOCATION: Secreted, extracellular space, extracellular matrix.			SIGNAL 1 20 {ECO:0000255}.
Q13519	PNOC	GO:0043679; GO:0030425; GO:0005576; GO:0007565; GO:0043025; GO:0005184; GO:0007218; GO:0031628; GO:0005886; GO:0007600; GO:0007165; GO:0007268	Evidence at protein level	SUBCELLULAR LOCATION: Secreted.			SIGNAL 1 19 {ECO:0000255}.
Q5K4E3	PRSS36	GO:0005737; GO:0005578; GO:0004252	Evidence at protein level	SUBCELLULAR LOCATION: Secreted, extracellular space, extracellular matrix {ECO:0000269|PubMed:15536082}. Note=Not attached to membranes.			SIGNAL 1 22 {ECO:0000255}.
P15309	ACPP	GO:0008253; GO:0031985; GO:0003993; GO:0046085; GO:0045177; GO:0033265; GO:0016311; GO:0070062; GO:0005615; GO:0030175; GO:0042802; GO:0016021; GO:0005622; GO:0052642; GO:0005765; GO:0005771; GO:0009117; GO:0005634; GO:0016791; GO:0005886; GO:0060168; GO:0006144; GO:0051930; GO:0030141; GO:0006772; GO:0042131; GO:0012506	Evidence at protein level	SUBCELLULAR LOCATION: Isoform 1: Secreted {ECO:0000305|PubMed:17638863}.; SUBCELLULAR LOCATION: Isoform 2: Cell membrane {ECO:0000269|PubMed:17638863, ECO:0000269|PubMed:17897319}; Single-pass type I membrane protein {ECO:0000255}. Lysosome membrane {ECO:0000269|PubMed:17638863, ECO:0000269|PubMed:17897319}; Single-pass type I membrane protein {ECO:0000255}. Note=Appears to shuttle between the ce…			SIGNAL 1 32
Q13162	PRDX4	GO:0019471; GO:0007252; GO:0045454; GO:0005829; GO:0070062; GO:0030198; GO:0005615; GO:0008584; GO:0005739; GO:2000255; GO:0005634; GO:0022417; GO:0072593; GO:0005790; GO:0007283; GO:0008379	Evidence at protein level	SUBCELLULAR LOCATION: Cytoplasm {ECO:0000269|PubMed:9388242}. Secreted {ECO:0000269|PubMed:9388242}.			SIGNAL 1 37 {ECO:0000244|PubMed:25944712, ECO:0000269|PubMed:19892738}.
Q7Z5L7	PODN	GO:0005518; GO:0019221; GO:0005737; GO:0005615; GO:0046426; GO:0030336; GO:0008285; GO:0006469; GO:0004860; GO:0005578	Evidence at protein level	SUBCELLULAR LOCATION: Isoform 1: Secreted, extracellular space, extracellular matrix.; SUBCELLULAR LOCATION: Isoform 2: Cytoplasm {ECO:0000305}.; SUBCELLULAR LOCATION: Isoform 3: Cytoplasm {ECO:0000305}.; SUBCELLULAR LOCATION: Isoform 4: Cytoplasm {ECO:0000305}.			SIGNAL 1 19 {ECO:0000255}.
Q96NZ9	PRAP1	GO:0005576	Evidence at protein level	SUBCELLULAR LOCATION: Secreted {ECO:0000269|PubMed:14583459}.			SIGNAL 1 20 {ECO:0000255}.
P13727	PRG2	GO:0030246; GO:0042742; GO:0002215; GO:0070062; GO:0005576; GO:0008201; GO:0006955; GO:0032693; GO:0032753; GO:0042035; GO:0030133	Evidence at protein level	SUBCELLULAR LOCATION: Bone marrow proteoglycan: Secreted. Note=The proform is secreted.; SUBCELLULAR LOCATION: Eosinophil granule major basic protein: Cytoplasmic vesicle, secretory vesicle. Note=The proform is secreted. The mature protein is found in the matrix of the eosinophil's large specific granule (crystalloid core).			SIGNAL 1 16 {ECO:0000269|PubMed:7539791, ECO:0000269|PubMed:7685339, ECO:0000269|PubMed:8507662}.
Q92954	PRG4	GO:0008283; GO:0005576; GO:0006955; GO:0030247; GO:0005044	Evidence at protein level	SUBCELLULAR LOCATION: Secreted {ECO:0000269|PubMed:14976050}.			SIGNAL 1 24 {ECO:0000255}.
P04070	PROC	GO:0006888; GO:0005794; GO:0005796; GO:0007596; GO:0005509; GO:0005783; GO:0005788; GO:0005576; GO:0005615; GO:0050900; GO:0043066; GO:0030195; GO:0050819; GO:0050728; GO:0017187; GO:1903142; GO:0006508; GO:0004252; GO:0006465	Evidence at protein level	SUBCELLULAR LOCATION: Secreted {ECO:0000269|PubMed:25618265}. Golgi apparatus {ECO:0000269|PubMed:22531345, ECO:0000269|PubMed:25748729}. Endoplasmic reticulum {ECO:0000269|PubMed:22531345, ECO:0000269|PubMed:25748729}.			SIGNAL 1 18 {ECO:0000255}.
P10163	PRB4	GO:0005576	Evidence at protein level	SUBCELLULAR LOCATION: Secreted.			SIGNAL 1 16 {ECO:0000269|PubMed:8373986}.
P58294	PROK1	GO:0001664; GO:0000187; GO:0001525; GO:0007623; GO:0005576; GO:0051781; GO:0008284; GO:0045765	Evidence at protein level	SUBCELLULAR LOCATION: Secreted.			SIGNAL 1 19 {ECO:0000269|PubMed:15340161}.
Q8NF86	PRSS33	GO:0005615; GO:0004252	Evidence at protein level	SUBCELLULAR LOCATION: Secreted {ECO:0000250}.			SIGNAL 1 22 {ECO:0000255}.
Q6UWY2	PRSS57	GO:0005576; GO:0004252	Evidence at protein level	SUBCELLULAR LOCATION: Secreted {ECO:0000305}.			SIGNAL 1 31 {ECO:0000255}.
P27169	PON1	GO:0102007; GO:0019439; GO:0004063; GO:0004064; GO:0072562; GO:0005509; GO:0046395; GO:0008203; GO:0070062; GO:0005576; GO:0005615; GO:0034364; GO:0043231; GO:0046434; GO:0046470; GO:0005543; GO:0051099; GO:0010875; GO:0032411; GO:0042803; GO:0009605; GO:0070542; GO:1902617; GO:0031667; GO:0009636; GO:0034366	Evidence at protein level	SUBCELLULAR LOCATION: Secreted, extracellular space.			SIGNAL 2 ? Not cleaved.
Q15063	POSTN	GO:1990523; GO:0007155; GO:0050839; GO:0044344; GO:0071560; GO:0071356; GO:0071307; GO:0031012; GO:0030198; GO:0005615; GO:0008201; GO:0046872; GO:0001953; GO:1900025; GO:0031594; GO:1990138; GO:1904209; GO:0014911; GO:0005578; GO:0008593; GO:0003073; GO:0032355; GO:0001666; GO:0009612; GO:0014850; GO:0001501; GO:0005802	Evidence at protein level	SUBCELLULAR LOCATION: Golgi apparatus {ECO:0000250|UniProtKB:Q62009}. Secreted {ECO:0000269|PubMed:18450759, ECO:0000269|PubMed:26273833}. Secreted, extracellular space, extracellular matrix {ECO:0000269|PubMed:12235007, ECO:0000269|PubMed:18450759}. Note=Colocalizes with BMP1 in the Golgi. {ECO:0000250|UniProtKB:Q62009}.			SIGNAL 1 21 {ECO:0000255}.
Q9HC23	PROK2	GO:0001664; GO:0007186; GO:0000187; GO:0001525; GO:0005623; GO:0008283; GO:0006935; GO:0007623; GO:0005576; GO:0006954; GO:0043066; GO:0007218; GO:0008284; GO:0007204; GO:0045987; GO:0045765; GO:0019233; GO:0007283	Evidence at protein level	SUBCELLULAR LOCATION: Secreted.			SIGNAL 1 27 {ECO:0000269|PubMed:15340161}.
P07225	PROS1	GO:0006888; GO:0005796; GO:0000139; GO:0007596; GO:0072562; GO:0005509; GO:0004866; GO:0005789; GO:0070062; GO:0005576; GO:0005615; GO:0042730; GO:0050900; GO:0017187; GO:0005886; GO:0031093; GO:0002576; GO:0050766; GO:0043234; GO:0030449; GO:0032496; GO:0006465	Evidence at protein level	SUBCELLULAR LOCATION: Secreted.			SIGNAL 1 24
P02810	PRH1	GO:0005615	Evidence at protein level	SUBCELLULAR LOCATION: Secreted.			SIGNAL 1 16 {ECO:0000269|PubMed:15693058, ECO:0000269|PubMed:3196309, ECO:0000269|PubMed:3710693, ECO:0000269|PubMed:438215, ECO:0000269|PubMed:7228490, ECO:0000269|PubMed:7380845, ECO:0000269|Ref.11}.
P02812	PRB2	GO:0005576	Evidence at protein level	SUBCELLULAR LOCATION: Secreted {ECO:0000250}.			SIGNAL 1 16 {ECO:0000255}.
Q99935	OPRPN	GO:0004866; GO:0005576; GO:0005615; GO:0030414; GO:0051930; GO:0001895	Evidence at protein level	SUBCELLULAR LOCATION: Secreted {ECO:0000269|PubMed:17101991}.			SIGNAL 1 21 {ECO:0000269|PubMed:17101991, ECO:0000269|PubMed:25946035}.
P04280	PRB1	GO:0005576	Evidence at protein level	SUBCELLULAR LOCATION: Secreted {ECO:0000269|PubMed:3521730}.			SIGNAL 1 16 {ECO:0000269|PubMed:1849422}.
P01236	PRL	GO:0060397; GO:0008283; GO:0007166; GO:0044267; GO:0005576; GO:0007565; GO:0005622; GO:0007595; GO:0046427; GO:0005148; GO:0040014	Evidence at protein level	SUBCELLULAR LOCATION: Secreted.			SIGNAL 1 28 {ECO:0000269|PubMed:1126929, ECO:0000269|PubMed:925136}.
Q9BQR3	PRSS27	GO:0005576; GO:0005886; GO:0004252	Evidence at protein level	SUBCELLULAR LOCATION: Secreted.			SIGNAL 1 22 {ECO:0000255}.
Q16378	PRR4	GO:0005615; GO:0001895; GO:0007601	Evidence at protein level	SUBCELLULAR LOCATION: Secreted.			SIGNAL 1 16 {ECO:0000255}.
P27918	CFP	GO:0006956; GO:0006957; GO:0042742; GO:0005788; GO:0005576; GO:0005615; GO:0006955; GO:0036066; GO:0030449	Evidence at protein level	SUBCELLULAR LOCATION: Secreted.			SIGNAL 1 27
P11464	PSG1	GO:0005576; GO:0007565	Evidence at protein level	SUBCELLULAR LOCATION: Secreted {ECO:0000305}.			SIGNAL 1 34
Q15238	PSG5	GO:0005576; GO:0007565	Evidence at protein level	SUBCELLULAR LOCATION: Secreted {ECO:0000305}.			SIGNAL 1 34 {ECO:0000255}.
P26022	PTX3	GO:0001872; GO:0001849; GO:0005576; GO:0005615; GO:0006954; GO:0045087; GO:0044869; GO:0044871; GO:1903016; GO:1903019; GO:0046597; GO:0008228; GO:0045429; GO:0050766; GO:0001878; GO:0046790	Evidence at protein level	SUBCELLULAR LOCATION: Secreted.			SIGNAL 1 17 {ECO:0000255}.
P07988	SFTPB	GO:0001664; GO:0097208; GO:0044267; GO:0045334; GO:0005789; GO:0008047; GO:0005576; GO:0005615; GO:0042599; GO:0005764; GO:0005771; GO:0097486; GO:0005654; GO:0009887; GO:0007585; GO:0006665	Evidence at protein level	SUBCELLULAR LOCATION: Secreted, extracellular space, surface film.			SIGNAL 1 24 {ECO:0000255}.
P41222	PTGDS	GO:0005794; GO:0019371; GO:0005789; GO:0070062; GO:0005576; GO:0005615; GO:0005504; GO:2000255; GO:0031965; GO:0048471; GO:0001516; GO:0004667; GO:0045187; GO:0051384; GO:0005501; GO:0005791; GO:0006810; GO:0005215	Evidence at protein level	SUBCELLULAR LOCATION: Rough endoplasmic reticulum {ECO:0000269|PubMed:9065498}. Nucleus membrane {ECO:0000269|PubMed:9065498}. Golgi apparatus {ECO:0000269|PubMed:9065498}. Cytoplasm, perinuclear region {ECO:0000269|PubMed:9065498}. Secreted {ECO:0000269|PubMed:9065498}. Note=Detected on rough endoplasmic reticulum of arachnoid and menigioma cells. Localized to the nuclear envelope, Golgi apparat…			SIGNAL 1 22 {ECO:0000269|PubMed:1726844, ECO:0000269|PubMed:7689714, ECO:0000269|PubMed:7692978, ECO:0000269|PubMed:8336134, ECO:0000269|PubMed:8336140, ECO:0000269|PubMed:9475419, ECO:0000269|PubMed:9844724}.
P12272	PTHLH	GO:0005794; GO:0007189; GO:0046058; GO:0007267; GO:0005737; GO:0008544; GO:0005576; GO:0005615; GO:0007565; GO:0005179; GO:0008285; GO:0032331; GO:0005654; GO:0002076; GO:0051428; GO:0030819; GO:0008284; GO:0010468; GO:0001501	Evidence at protein level	SUBCELLULAR LOCATION: Cytoplasm. Nucleus. Secreted.			SIGNAL 1 24 {ECO:0000255}.
P01270	PTH	GO:0007186; GO:0007266; GO:0007189; GO:0045453; GO:0046058; GO:0007267; GO:0006874; GO:0034645; GO:0005576; GO:0005615; GO:0048873; GO:0005179; GO:0008628; GO:0005622; GO:0071866; GO:0000122; GO:0031856; GO:0051428; GO:0030501; GO:0030819; GO:0071864; GO:0046326; GO:0045725; GO:0090290; GO:0009967; GO:0045944; GO:0010468; GO:0046686; GO:0042493; GO:0045471; GO:0071774; GO:0010288; GO:0071107; GO:…	Evidence at protein level	SUBCELLULAR LOCATION: Secreted.			SIGNAL 1 25 {ECO:0000269|PubMed:15340161, ECO:0000269|PubMed:4833516}.
A1KZ92	PXDNL	GO:0005737; GO:0004519; GO:0005615; GO:0020037; GO:0042744; GO:0046872; GO:0055114; GO:0004601; GO:0006979	Evidence at protein level	SUBCELLULAR LOCATION: Secreted {ECO:0000305}.; SUBCELLULAR LOCATION: Isoform PMR1: Cytoplasm. Note=Associates with polysomes.			SIGNAL 1 23 {ECO:0000255}.
Q92626	PXDN	GO:0005783; GO:0070062; GO:0031012; GO:0030198; GO:0005201; GO:0005615; GO:0020037; GO:0042744; GO:0006955; GO:0005152; GO:0046872; GO:0055114; GO:0004601; GO:0005578; GO:0006979	Evidence at protein level	SUBCELLULAR LOCATION: Secreted, extracellular space, extracellular matrix {ECO:0000269|PubMed:19590037, ECO:0000269|Ref.8}. Note=Enriched in the peritubular space of fibrotic kidneys.			SIGNAL 1 26 {ECO:0000255}.
P21246	PTN	GO:0005604; GO:0030282; GO:0009986; GO:0034644; GO:0071456; GO:0036120; GO:0071305; GO:0021549; GO:0005783; GO:0045446; GO:0044849; GO:0005615; GO:0007507; GO:1904399; GO:0008201; GO:0007612; GO:0001889; GO:0060291; GO:0030324; GO:0016020; GO:0016525; GO:0030336; GO:0050680; GO:0060253; GO:0045837; GO:0072201; GO:1904397; GO:0007399; GO:0031594; GO:0048471; GO:0043065; GO:0051781; GO:0008284; GO:…	Evidence at protein level	SUBCELLULAR LOCATION: Secreted {ECO:0000269|PubMed:1733956, ECO:0000269|PubMed:8241100}.			SIGNAL 1 32 {ECO:0000269|PubMed:1733956, ECO:0000269|PubMed:2388713, ECO:0000269|PubMed:8241100}.
P10082	PYY	GO:0001664; GO:0007186; GO:0008283; GO:0007267; GO:0007010; GO:0007586; GO:0042755; GO:0005576; GO:0005615; GO:0007631; GO:0005179; GO:0006928; GO:0005184; GO:0007218; GO:0032098	Evidence at protein level	SUBCELLULAR LOCATION: Secreted.			SIGNAL 1 28 {ECO:0000269|PubMed:2587421, ECO:0000269|PubMed:3202875}.
P20742	PZP	GO:0072562; GO:0004866; GO:0070062; GO:0005576; GO:0007565; GO:0004867	Evidence at protein level	SUBCELLULAR LOCATION: Secreted.			SIGNAL 1 25
Q99969	RARRES2	GO:0050873; GO:0006935; GO:0048566; GO:0070062; GO:0031012; GO:0005576; GO:0001701; GO:0006954; GO:0002576; GO:0031089; GO:0050921; GO:0045600; GO:2001275; GO:0010759; GO:0001934; GO:0005102; GO:0050994; GO:0001523	Evidence at protein level	SUBCELLULAR LOCATION: Secreted {ECO:0000305}.			SIGNAL 1 20 {ECO:0000269|PubMed:14675762}.
Q8WXF3	RLN3	GO:0001664; GO:0005576; GO:0005179	Evidence at protein level	SUBCELLULAR LOCATION: Secreted.			SIGNAL 1 25 {ECO:0000269|PubMed:12686464}.
Q9HD89	RETN	GO:0007568; GO:0070062; GO:0005615; GO:0045444; GO:0005179; GO:2000252; GO:0005634; GO:0010714; GO:2000872; GO:0014911; GO:0048661; GO:0050806; GO:0032868; GO:0009612	Evidence at protein level	SUBCELLULAR LOCATION: Secreted.			SIGNAL 1 18 {ECO:0000255}.
P04090	RLN2	GO:0005576; GO:0007565; GO:0045766; GO:0030819; GO:0010628; GO:0050790	Evidence at protein level	SUBCELLULAR LOCATION: Secreted.			SIGNAL 1 24 {ECO:0000269|PubMed:1572287}.
Q06141	REG3A	GO:0006953; GO:0030246; GO:0008283; GO:0005737; GO:0005615; GO:0007157; GO:0007275; GO:0045617; GO:0010838; GO:0090303	Evidence at protein level	SUBCELLULAR LOCATION: Secreted. Note=Found in the apical region of pancreatic acinar cells.			SIGNAL 1 26 {ECO:0000250}.
Q6UW15	REG3G	GO:0002755; GO:0006953; GO:0030246; GO:0005737; GO:0050830; GO:0005576; GO:0045617; GO:0010838; GO:0090303	Evidence at protein level	SUBCELLULAR LOCATION: Secreted. Cytoplasm {ECO:0000250}.			SIGNAL 1 26 {ECO:0000269|PubMed:15340161, ECO:0000269|PubMed:19095652}.
P78509	RELN	GO:0097114; GO:0008306; GO:0007411; GO:0007420; GO:0007155; GO:0000904; GO:0007417; GO:0021800; GO:0005737; GO:0030425; GO:0016358; GO:0005615; GO:0010001; GO:0021766; GO:0097477; GO:0021819; GO:0070325; GO:0007616; GO:0060291; GO:0046872; GO:0050804; GO:0001764; GO:0018108; GO:0005886; GO:0032793; GO:0032008; GO:2000969; GO:0061003; GO:2000463; GO:1902078; GO:1900273; GO:0010976; GO:0050731; GO:…	Evidence at protein level	SUBCELLULAR LOCATION: Secreted, extracellular space, extracellular matrix {ECO:0000250}.			SIGNAL 1 25 {ECO:0000255}.
P00797	REN	GO:0002003; GO:0004190; GO:0050435; GO:0048469; GO:0035690; GO:0042756; GO:0005576; GO:0005615; GO:0009755; GO:0001822; GO:0005764; GO:0008584; GO:0001823; GO:0008233; GO:0005886; GO:0006508; GO:0005102; GO:0043408; GO:0008217; GO:0002018; GO:0051591; GO:0070305; GO:0035902; GO:0032496	Evidence at protein level	SUBCELLULAR LOCATION: Secreted. Membrane. Note=Associated to membranes via binding to ATP6AP2.			SIGNAL 1 23 {ECO:0000269|PubMed:2016271}.
P10745	RBP3	GO:0005576; GO:0005615; GO:1903561; GO:0033165; GO:0006629; GO:0016918; GO:0005501; GO:0001523; GO:0019841; GO:0008236; GO:0006810; GO:0007601	Evidence at protein level	SUBCELLULAR LOCATION: Secreted, extracellular space, extracellular matrix, interphotoreceptor matrix. Note=Interphotoreceptor matrix that permeates the space between the retina and the contiguous layer of pigment epithelium cells.			SIGNAL 1 17 {ECO:0000269|PubMed:3827838}.
Q9BYZ8	REG4	GO:0005737; GO:0005576; GO:0008201; GO:2001065	Evidence at protein level	SUBCELLULAR LOCATION: Secreted {ECO:0000269|PubMed:12819006}.			SIGNAL 1 22 {ECO:0000269|PubMed:15340161}.
P02753	RBP4	GO:0048738; GO:0005829; GO:0048562; GO:0060059; GO:0048706; GO:0070062; GO:0005576; GO:0005615; GO:0001654; GO:0048807; GO:0006094; GO:0042593; GO:0007507; GO:0060347; GO:0030324; GO:0030277; GO:0060044; GO:0051024; GO:0032024; GO:0043234; GO:0045471; GO:0032526; GO:0016918; GO:0001523; GO:0019841; GO:0042572; GO:0034633; GO:0034632; GO:0060157; GO:0060065; GO:0060068; GO:0007601	Evidence at protein level	SUBCELLULAR LOCATION: Secreted.			SIGNAL 1 18 {ECO:0000269|PubMed:2444024, ECO:0000269|PubMed:573217, ECO:0000269|PubMed:6942701}.
Q9H1E1	RNASE7	GO:0019731; GO:0050829; GO:0050830; GO:0004519; GO:0070062; GO:0005576; GO:0045087; GO:0001530; GO:0051673; GO:0003676; GO:0042834; GO:0009617; GO:0004540	Evidence at protein level	SUBCELLULAR LOCATION: Secreted.			SIGNAL 1 28 {ECO:0000255}.
Q5VYX0	RNLS	GO:0005615; GO:0016491; GO:0071871; GO:0002931; GO:1902074	Evidence at protein level	SUBCELLULAR LOCATION: Secreted {ECO:0000269|PubMed:15841207}.			SIGNAL 1 17 {ECO:0000255}.
O00584	RNASET2	GO:0003723; GO:0006401; GO:0005788; GO:0070062; GO:0005576; GO:0005615; GO:0043202; GO:0005764; GO:0033897; GO:0004540	Evidence at protein level	SUBCELLULAR LOCATION: Secreted. Lysosome lumen. Endoplasmic reticulum lumen. Note=Subcellular fractionation of transfected ovarian cancer cells reveals full-length RNASET2 in the endoplasmic reticulum fraction and the 2 smaller RNASET2 proteolytic products in the lysosome fraction.			SIGNAL 1 24 {ECO:0000255}.
Q93091	RNASE6	GO:0006401; GO:0006952; GO:0004519; GO:0070062; GO:0005576; GO:0003676; GO:0004540	Evidence at protein level	SUBCELLULAR LOCATION: Secreted.			SIGNAL 1 23 {ECO:0000250}.
Q8TDE3	RNASE8	GO:0005576; GO:0003676; GO:0004522	Evidence at protein level	SUBCELLULAR LOCATION: Secreted {ECO:0000305}.			SIGNAL 1 27 {ECO:0000255}.
P34096	RNASE4	GO:0004519; GO:0070062; GO:0005576; GO:0006379; GO:0003676; GO:0004522; GO:0004540	Evidence at protein level	SUBCELLULAR LOCATION: Secreted.			SIGNAL 1 28 {ECO:0000269|PubMed:8223579}.
P60153	RNASE9	GO:0005576; GO:0003676; GO:0060474	Evidence at protein level	SUBCELLULAR LOCATION: Secreted {ECO:0000305}.			SIGNAL 1 26 {ECO:0000269|PubMed:19137000}.
Q2MKA7	RSPO1	GO:0001664; GO:0016055; GO:0005576; GO:0008201; GO:0005634; GO:0030177; GO:0090263; GO:0001934; GO:0005102; GO:0002090	Evidence at protein level	SUBCELLULAR LOCATION: Secreted {ECO:0000250|UniProtKB:Q9Z132}. Nucleus {ECO:0000250|UniProtKB:Q9Z132}. Note=Seems to mainly localize to nucleoli. {ECO:0000250|UniProtKB:Q9Z132}.			SIGNAL 1 20 {ECO:0000255}.
Q2I0M5	RSPO4	GO:0016055; GO:0005576; GO:0008201; GO:0035878; GO:0030177	Evidence at protein level	SUBCELLULAR LOCATION: Secreted {ECO:0000250}.			SIGNAL 1 19 {ECO:0000255}.
Q6UXX9	RSPO2	GO:0016055; GO:0030282; GO:0009986; GO:0071542; GO:0035115; GO:0035116; GO:0060441; GO:0005576; GO:0008201; GO:0060437; GO:0042489; GO:0001649; GO:0030177; GO:0090263; GO:0005102; GO:0060535	Evidence at protein level	SUBCELLULAR LOCATION: Secreted {ECO:0000250}.			SIGNAL 1 21 {ECO:0000255}.
Q9BXY4	RSPO3	GO:0016055; GO:0001974; GO:0060670; GO:0005576; GO:0008201; GO:0030177; GO:2000096; GO:0090263; GO:2000052; GO:0005102; GO:0002040	Evidence at protein level	SUBCELLULAR LOCATION: Secreted {ECO:0000250|UniProtKB:Q2TJ95}.			SIGNAL 1 21 {ECO:0000255}.
Q8IVN8	SBSPON	GO:0006955; GO:0030247; GO:0005578; GO:0005044	Evidence at protein level	SUBCELLULAR LOCATION: Secreted, extracellular space, extracellular matrix {ECO:0000269|PubMed:20551380}.			SIGNAL 1 20 {ECO:0000255}.
Q96DX4	RSPRY1	GO:0005576; GO:0008270	Evidence at protein level	SUBCELLULAR LOCATION: Secreted {ECO:0000305}.			SIGNAL 1 16 {ECO:0000255}.
P0DJI8	SAA1	GO:0001664; GO:0000187; GO:0006953; GO:0044267; GO:0042056; GO:0005881; GO:0071682; GO:0070062; GO:0005576; GO:0005615; GO:0008201; GO:0034364; GO:0045087; GO:0048247; GO:0048246; GO:0050728; GO:0030593; GO:0030168; GO:0045785; GO:0050715; GO:0007204; GO:0050716; GO:0006898; GO:0050708	Evidence at protein level	SUBCELLULAR LOCATION: Secreted {ECO:0000269|PubMed:7115671}.			SIGNAL 1 18 {ECO:0000269|PubMed:11946204, ECO:0000269|PubMed:1259755, ECO:0000269|PubMed:1463770, ECO:0000269|PubMed:1546977, ECO:0000269|PubMed:4816450, ECO:0000269|PubMed:5055786, ECO:0000269|PubMed:5056669, ECO:0000269|PubMed:6155694, ECO:0000269|PubMed:7115671}.
P02743	APCS	GO:0006953; GO:0072562; GO:0005509; GO:0030246; GO:0044267; GO:0051131; GO:0001849; GO:0070062; GO:0005576; GO:0005615; GO:0045087; GO:0044869; GO:0044871; GO:0002674; GO:1903016; GO:1903019; GO:0045656; GO:0046597; GO:0048525; GO:0061045; GO:0005634; GO:0006457; GO:0051082; GO:0046790	Evidence at protein level	SUBCELLULAR LOCATION: Secreted.			SIGNAL 1 19 {ECO:0000269|PubMed:4055725, ECO:0000269|PubMed:81686}.
P48061	CXCL12	GO:0045236; GO:0007186; GO:0008344; GO:0007411; GO:0008015; GO:0007155; GO:0060326; GO:0006874; GO:0042056; GO:0008009; GO:0042379; GO:0070098; GO:0006935; GO:0009897; GO:0070062; GO:0005576; GO:0005615; GO:0006955; GO:0050930; GO:1902230; GO:2000107; GO:1903237; GO:0001764; GO:0031100; GO:2000406; GO:0048842; GO:0090280; GO:0045785; GO:0033603; GO:0001938; GO:0090026; GO:0005102; GO:0008064; GO:…	Evidence at protein level	SUBCELLULAR LOCATION: Secreted.			SIGNAL 1 21 {ECO:0000255}.
P0DJI9	SAA2	GO:0006953; GO:0060326; GO:0042056; GO:0070062; GO:0005615; GO:0034364	Evidence at protein level	SUBCELLULAR LOCATION: Secreted.			SIGNAL 1 18 {ECO:0000255}.
P05060	CHGB	GO:0005576; GO:0005179; GO:0030141	Evidence at protein level	SUBCELLULAR LOCATION: Secreted. Note=Neuroendocrine and endocrine secretory granules.			SIGNAL 1 20 {ECO:0000269|PubMed:1882087, ECO:0000269|PubMed:3608978}.
P07602	PSAP	GO:0001664; GO:0007193; GO:0071310; GO:0005737; GO:0008047; GO:0060742; GO:0070062; GO:0005576; GO:0005615; GO:0006687; GO:0016021; GO:0008289; GO:0006869; GO:0043202; GO:0005765; GO:0005739; GO:1903206; GO:0002576; GO:0043410; GO:0060736; GO:0010506; GO:0019216	Evidence at protein level	SUBCELLULAR LOCATION: Lysosome {ECO:0000269|PubMed:14657016, ECO:0000269|PubMed:21835174}.; SUBCELLULAR LOCATION: Prosaposin: Secreted. Note=Secreted as a fully glycosylated 70 kDa protein composed of complex glycans. {ECO:0000250|UniProtKB:Q61207}.			SIGNAL 1 16 {ECO:0000244|PubMed:25944712, ECO:0000269|PubMed:1958198, ECO:0000269|PubMed:8323276}.
P35542	SAA4	GO:0006953; GO:0060326; GO:0042056; GO:0070062; GO:0005576; GO:0005615; GO:0034364	Evidence at protein level	SUBCELLULAR LOCATION: Secreted.			SIGNAL 1 18
Q8IX30	SCUBE3	GO:0005509; GO:0009986; GO:0005576; GO:0051291; GO:0051260	Evidence at protein level	SUBCELLULAR LOCATION: Secreted {ECO:0000269|PubMed:15234972}. Cell surface {ECO:0000269|PubMed:15234972}.			SIGNAL 1 20 {ECO:0000255}.
O15041	SEMA3E	GO:0045499; GO:0005576; GO:0005615; GO:0050919; GO:0016525; GO:0048843; GO:0001953; GO:0001755; GO:0038191; GO:0001569; GO:0030335; GO:2000249; GO:0008360; GO:0030215; GO:0071526; GO:0002040; GO:0050808	Evidence at protein level	SUBCELLULAR LOCATION: Secreted {ECO:0000250}.			SIGNAL 1 25 {ECO:0000255}.
Q6FHJ7	SFRP4	GO:0004930; GO:0042813; GO:0017147; GO:0030154; GO:0009986; GO:0005737; GO:0005615; GO:0016021; GO:0098779; GO:0007275; GO:0030178; GO:0090090; GO:0008285; GO:0043433; GO:2000119; GO:0035567; GO:0005634; GO:0055062; GO:0043065; GO:0090263; GO:0045606; GO:0010628; GO:1902174; GO:0002092; GO:0009725	Evidence at protein level	SUBCELLULAR LOCATION: Secreted {ECO:0000269|PubMed:19480240}. Note=Cytoplasmic in ovarian tumor cells.			SIGNAL 1 18 {ECO:0000255}.
O95968	SCGB1D1	GO:0005615; GO:0046982	Evidence at protein level	SUBCELLULAR LOCATION: Secreted {ECO:0000305}.			SIGNAL 1 21 {ECO:0000269|PubMed:25946035, ECO:0000269|PubMed:9720917}.
Q6XE38	SCGB1D4	GO:0005576	Evidence at protein level	SUBCELLULAR LOCATION: Secreted.			SIGNAL 1 21 {ECO:0000269|PubMed:15340161}.
P13521	SCG2	GO:0000165; GO:0001525; GO:0042056; GO:0005125; GO:0031045; GO:0043542; GO:0048245; GO:0005615; GO:0050930; GO:0006954; GO:0035556; GO:2000352; GO:0001937; GO:2001237; GO:0050918; GO:0001938; GO:0009306	Evidence at protein level	SUBCELLULAR LOCATION: Secreted. Note=Neuroendocrine and endocrine secretory granules.			SIGNAL 1 27 {ECO:0000255}.
Q8IWY4	SCUBE1	GO:0007512; GO:0007596; GO:0005509; GO:0009986; GO:0045446; GO:0009897; GO:0005615; GO:0019897; GO:0042802; GO:0006954; GO:0009791; GO:0046982; GO:0051260	Evidence at protein level	SUBCELLULAR LOCATION: Secreted {ECO:0000269|PubMed:12270931, ECO:0000269|PubMed:16753137}. Cell membrane {ECO:0000269|PubMed:16753137}; Peripheral membrane protein {ECO:0000269|PubMed:16753137}.			SIGNAL 1 23 {ECO:0000255}.
P09683	SCT	GO:0007420; GO:0048566; GO:0005576; GO:0005615; GO:0005179; GO:1903640; GO:0030157; GO:0030819; GO:0090187; GO:0090274	Evidence at protein level	SUBCELLULAR LOCATION: Secreted.			SIGNAL 1 18 {ECO:0000255}.
Q96HF1	SFRP2	GO:0004930; GO:0090244; GO:0042813; GO:0017147; GO:0060349; GO:0003214; GO:0007267; GO:0071481; GO:0031668; GO:0002063; GO:0030199; GO:0060028; GO:0048546; GO:0042733; GO:0061133; GO:0031012; GO:0005615; GO:0001968; GO:0071425; GO:0016021; GO:0005178; GO:0008584; GO:1904693; GO:0030514; GO:0043508; GO:0030178; GO:0090090; GO:0010667; GO:0030308; GO:0030336; GO:0008285; GO:0043154; GO:0061185; GO:…	Evidence at protein level	SUBCELLULAR LOCATION: Secreted {ECO:0000250}.			SIGNAL 1 24 {ECO:0000269|PubMed:15340161}.
Q6UW10	SFTA2	GO:0005576	Evidence at protein level	SUBCELLULAR LOCATION: Secreted {ECO:0000305|PubMed:22768197}. Cytoplasmic vesicle, secretory vesicle {ECO:0000269|PubMed:22768197}. Golgi apparatus {ECO:0000269|PubMed:22768197}.			SIGNAL 1 19 {ECO:0000269|PubMed:15340161}.
Q9HAT2	SIAE	GO:0005975; GO:0070062; GO:0005615; GO:0005764; GO:0002682; GO:0001681	Evidence at protein level	SUBCELLULAR LOCATION: Lysosome {ECO:0000305}. Secreted.			SIGNAL 1 23 {ECO:0000255}.
Q8WXD2	SCG3	GO:0031410; GO:0005576; GO:0002576; GO:0044822; GO:0034774; GO:0030658	Evidence at protein level	SUBCELLULAR LOCATION: Cytoplasmic vesicle, secretory vesicle lumen {ECO:0000250}. Cytoplasmic vesicle, secretory vesicle membrane {ECO:0000250}; Peripheral membrane protein {ECO:0000250}. Secreted. Note=Associated with the secretory granule membrane through direct binding to cholesterol-enriched lipid rafts in intragranular conditions (By similarity). Neuroendocrine and endocrine secretory granul…			SIGNAL 1 19 {ECO:0000255}.
O75711	SCRG1	GO:0005794; GO:0005615; GO:0007399; GO:0044306	Evidence at protein level	SUBCELLULAR LOCATION: Secreted {ECO:0000305}.			SIGNAL 1 20 {ECO:0000269|PubMed:15340161}.
Q99470	SDF2	GO:0000032; GO:0044845; GO:0004169; GO:0031502; GO:0005615; GO:0007275; GO:0006486; GO:1900101	Evidence at protein level	SUBCELLULAR LOCATION: Secreted {ECO:0000305}.			SIGNAL 1 18 {ECO:0000244|PubMed:25944712, ECO:0000255}.
P35247	SFTPD	GO:0030246; GO:0044267; GO:0045334; GO:0005581; GO:0042742; GO:0030139; GO:0005789; GO:0005576; GO:0005615; GO:0045087; GO:0042599; GO:0048286; GO:0005764; GO:0048246; GO:0042130; GO:0045085; GO:0050766; GO:0005578; GO:0072593; GO:0006898; GO:0001817; GO:0050776; GO:0007585; GO:0043129	Evidence at protein level	SUBCELLULAR LOCATION: Secreted, extracellular space, extracellular matrix. Secreted, extracellular space, surface film.			SIGNAL 1 20 {ECO:0000250}.
Q14563	SEMA3A	GO:0006915; GO:0030424; GO:0048846; GO:0007411; GO:0007413; GO:0060385; GO:0021785; GO:0045499; GO:0030425; GO:0048813; GO:0060666; GO:0005576; GO:0005615; GO:0021612; GO:1903375; GO:0021828; GO:0048843; GO:0010633; GO:0021675; GO:0001755; GO:1901166; GO:1903045; GO:0001764; GO:0038191; GO:0021772; GO:2000020; GO:2001224; GO:0048841; GO:0002027; GO:0030215; GO:0071526; GO:1902287; GO:1902285; GO:…	Evidence at protein level	SUBCELLULAR LOCATION: Secreted {ECO:0000250}.			SIGNAL 1 20 {ECO:0000255}.
Q02383	SEMG2	GO:0019731; GO:0050817; GO:0070062; GO:0005615; GO:0046872; GO:1901318; GO:0005634; GO:1900005; GO:0002020; GO:0051291	Evidence at protein level	SUBCELLULAR LOCATION: Secreted.			SIGNAL 1 23
Q8N474	SFRP1	GO:0004930; GO:0090244; GO:0042813; GO:0017147; GO:0060346; GO:0060070; GO:0009986; GO:0071773; GO:0071481; GO:0071392; GO:0071391; GO:0044344; GO:0071363; GO:0071504; GO:0071456; GO:0071347; GO:0071380; GO:0009267; GO:0071560; GO:0071356; GO:0071305; GO:0090246; GO:0004197; GO:0005829; GO:0048546; GO:0071542; GO:0009950; GO:0008144; GO:0070062; GO:0031012; GO:0005576; GO:0005615; GO:0008585; GO:…	Evidence at protein level	SUBCELLULAR LOCATION: Secreted. Note=Cell membrane or extracellular matrix-associated. Released by heparin-binding.			SIGNAL 1 31 {ECO:0000269|PubMed:11741940}.
Q8IWL2	SFTPA1	GO:0030246; GO:0044267; GO:0045334; GO:0005581; GO:0005789; GO:0005576; GO:0005615; GO:0042599; GO:0005319; GO:0005578; GO:0007585	Evidence at protein level	SUBCELLULAR LOCATION: Secreted, extracellular space, extracellular matrix. Secreted, extracellular space, surface film.			SIGNAL 1 20
P21815	IBSP	GO:0030282; GO:0007155; GO:0071363; GO:0031012; GO:0030198; GO:0005576; GO:0005615; GO:0016020; GO:0031988; GO:0001649	Evidence at protein level	SUBCELLULAR LOCATION: Secreted.			SIGNAL 1 16
P01286	GHRH	GO:0021984; GO:0007189; GO:0019933; GO:0007267; GO:0005576; GO:0005615; GO:0030252; GO:0016608; GO:0031770; GO:0005622; GO:0030819; GO:0008284; GO:0046005; GO:0060124; GO:0043568; GO:0040018; GO:0032094; GO:0043195	Evidence at protein level	SUBCELLULAR LOCATION: Secreted.			SIGNAL 1 20 {ECO:0000255}.
P04279	SEMG1	GO:0019731; GO:0044267; GO:0050817; GO:0070062; GO:0005576; GO:0005615; GO:0007320; GO:0046872; GO:0090281; GO:1901318; GO:0005634; GO:1900005; GO:0043234; GO:0051291	Evidence at protein level	SUBCELLULAR LOCATION: Secreted.			SIGNAL 1 23
Q8IWL1	SFTPA2	GO:0030246; GO:0044267; GO:0045334; GO:0005581; GO:0005789; GO:0005576; GO:0005615; GO:0042599; GO:0005578; GO:0007585	Evidence at protein level	SUBCELLULAR LOCATION: Secreted, extracellular space, extracellular matrix. Secreted, extracellular space, surface film.			SIGNAL 1 20
Q92765	FRZB	GO:0004930; GO:0042813; GO:0017147; GO:0090103; GO:0060029; GO:0005615; GO:0016021; GO:0016020; GO:0030178; GO:0090090; GO:0061037; GO:0010721; GO:0030308; GO:0008285; GO:0070367; GO:0014033; GO:0035567; GO:0043065; GO:0045600; GO:0001501; GO:0061053	Evidence at protein level	SUBCELLULAR LOCATION: Secreted {ECO:0000305}.			SIGNAL 1 32 {ECO:0000269|PubMed:15340161}.
P03973	SLPI	GO:0019731; GO:0004866; GO:0019899; GO:0070062; GO:0005615; GO:0006955; GO:0045087; GO:0032091; GO:0045071; GO:0032496; GO:0004867	Evidence at protein level	SUBCELLULAR LOCATION: Secreted {ECO:0000269|PubMed:2039600, ECO:0000269|PubMed:24352879, ECO:0000269|PubMed:3462719, ECO:0000269|PubMed:3485543}.			SIGNAL 1 25 {ECO:0000269|PubMed:2039600, ECO:0000269|PubMed:25946035, ECO:0000269|PubMed:3462719, ECO:0000269|PubMed:3485543}.
P01241	GH1	GO:0007259; GO:0060397; GO:0070977; GO:0005576; GO:0005615; GO:0015758; GO:0008083; GO:0005131; GO:0060396; GO:0005622; GO:0046872; GO:0046427; GO:0043406; GO:0010535; GO:0043568; GO:0040018; GO:0050731; GO:0014068; GO:0042517; GO:0042523; GO:0005148; GO:0032355	Evidence at protein level	SUBCELLULAR LOCATION: Secreted.			SIGNAL 1 26 {ECO:0000269|PubMed:5144027, ECO:0000269|PubMed:5279046, ECO:0000269|PubMed:5810834}.
P49908	SELENOP	GO:0007420; GO:0070062; GO:0005576; GO:0005615; GO:0040007; GO:0007626; GO:0002576; GO:0031089; GO:0009791; GO:0006979; GO:0008430; GO:0001887; GO:0019953	Evidence at protein level	SUBCELLULAR LOCATION: Secreted.			SIGNAL 1 19
Q96QR1	SCGB3A1	GO:0005125; GO:0070062; GO:0005615; GO:0030308; GO:1901741; GO:0042127	Evidence at protein level	SUBCELLULAR LOCATION: Secreted.			SIGNAL 1 20 {ECO:0000269|PubMed:15340161}.
P01242	GH2	GO:0060397; GO:0005576; GO:0005179; GO:0005622	Evidence at protein level	SUBCELLULAR LOCATION: Secreted.			SIGNAL 1 26 {ECO:0000269|PubMed:2196278}.
P02814	SMR3B	GO:0070062; GO:0005615	Evidence at protein level	SUBCELLULAR LOCATION: Secreted.			SIGNAL 1 22 {ECO:0000269|PubMed:479131}.
O75830	SERPINI2	GO:0070062; GO:0005615; GO:0006928; GO:0004867	Evidence at protein level	SUBCELLULAR LOCATION: Secreted {ECO:0000305}.			SIGNAL 1 18 {ECO:0000255}.
P04278	SHBG	GO:0005497; GO:0070062; GO:0005576	Evidence at protein level	SUBCELLULAR LOCATION: Secreted {ECO:0000250}. Note=In testis, it is synthesized by the Sertoli cells, secreted into the lumen of the seminiferous tubule and transported to the epididymis. {ECO:0000250}.			SIGNAL 1 29 {ECO:0000269|PubMed:3542030, ECO:0000269|PubMed:3702459}.
Q15465	SHH	GO:0060020; GO:0043369; GO:0033077; GO:0008209; GO:0097190; GO:0060840; GO:0007411; GO:0007596; GO:0060445; GO:0001658; GO:0048754; GO:0060447; GO:0005509; GO:0043010; GO:0060070; GO:0048468; GO:0001708; GO:0009986; GO:0007267; GO:0071285; GO:0007417; GO:0021930; GO:0005829; GO:0003140; GO:0071542; GO:0021904; GO:0009953; GO:0007398; GO:0009790; GO:0048557; GO:0042733; GO:0048617; GO:0035115; GO:…	Evidence at protein level	SUBCELLULAR LOCATION: Sonic hedgehog protein C-product: Secreted, extracellular space {ECO:0000250|UniProtKB:Q62226}. Note=The C-terminal peptide diffuses from the cell. {ECO:0000250|UniProtKB:Q62226}.; SUBCELLULAR LOCATION: Sonic hedgehog protein N-product: Cell membrane {ECO:0000250|UniProtKB:Q62226}; Lipid-anchor {ECO:0000250|UniProtKB:Q62226}. Note=The N-product either remains associated with…			SIGNAL 1 23 {ECO:0000269|PubMed:9593755}.
O94813	SLIT2	GO:0005095; GO:0048495; GO:0035385; GO:0061364; GO:0048846; GO:0007411; GO:0048754; GO:0005509; GO:0002042; GO:0009986; GO:0071504; GO:0032870; GO:0021836; GO:0021972; GO:0005737; GO:0070062; GO:0005576; GO:0005615; GO:0008201; GO:0042802; GO:0050929; GO:0043237; GO:0016020; GO:0008045; GO:0050919; GO:0030837; GO:0030308; GO:0030336; GO:0090288; GO:0070100; GO:0010596; GO:0050728; GO:0010593; GO:…	Evidence at protein level	SUBCELLULAR LOCATION: Secreted {ECO:0000269|PubMed:10102268}. Note=The C-terminal cleavage protein is more diffusible than the larger N-terminal protein that is more tightly cell associated.			SIGNAL 1 30 {ECO:0000255}.
P55000	SLURP1	GO:0001775; GO:0007155; GO:0005125; GO:0070062; GO:0005576; GO:0005615; GO:0007626; GO:0010839; GO:0050884	Evidence at protein level	SUBCELLULAR LOCATION: Secreted.			SIGNAL 1 22 {ECO:0000269|PubMed:10211827}.
Q96KW9	SPACA7	GO:0043160; GO:0001669; GO:0005576; GO:0007162; GO:0007338	Evidence at protein level	SUBCELLULAR LOCATION: Secreted {ECO:0000250|UniProtKB:Q9D2S4}. Cytoplasmic vesicle, secretory vesicle, acrosome {ECO:0000269|PubMed:22495889}. Cytoplasmic vesicle, secretory vesicle, acrosome lumen {ECO:0000250|UniProtKB:Q9D2S4}. Note=Localized in perinuclear pro-acrosomal granules in round spermatides. Localized between the inner and outer acrosomal membranes (matrix or lumen) in spermatozoa. Se…			SIGNAL 1 24 {ECO:0000255}.
P09486	SPARC	GO:0005604; GO:0060348; GO:0005509; GO:0009986; GO:0071363; GO:0005518; GO:0005737; GO:0071682; GO:0050840; GO:0030198; GO:0005576; GO:0005615; GO:0007507; GO:0048839; GO:0030324; GO:0016525; GO:0001937; GO:0016363; GO:0001503; GO:0031091; GO:0031093; GO:0031092; GO:0002576; GO:0010595; GO:0006898; GO:0022604; GO:0033591; GO:0051591; GO:0046686; GO:0051592; GO:0034097; GO:0045471; GO:0051384; GO:…	Evidence at protein level	SUBCELLULAR LOCATION: Secreted, extracellular space, extracellular matrix, basement membrane {ECO:0000269|PubMed:2306517, ECO:0000269|PubMed:3400777, ECO:0000269|PubMed:7495300, ECO:0000269|PubMed:9457905}. Note=In or around the basement membrane.			SIGNAL 1 17 {ECO:0000269|PubMed:2306517, ECO:0000269|PubMed:3597437}.
Q9NWH7	SPATA6	GO:0030154; GO:0005576; GO:0044458; GO:0007275; GO:0097224; GO:0007283	Evidence at protein level	SUBCELLULAR LOCATION: Secreted {ECO:0000250|UniProtKB:Q3U6K5}. Cell projection, cilium, flagellum {ECO:0000250|UniProtKB:Q3U6K5}. Note=Specifically localizes to the segmented columns and the capitulum of the sperm connecting piece. {ECO:0000250|UniProtKB:Q3U6K5}.			SIGNAL 1 20 {ECO:0000255}.
O43278	SPINT1	GO:0060670; GO:0071773; GO:0070062; GO:0030198; GO:0005576; GO:0005615; GO:0016020; GO:2000178; GO:0001843; GO:0060674; GO:0005886; GO:0045687; GO:0004867	Evidence at protein level	SUBCELLULAR LOCATION: Secreted.			SIGNAL 1 35 {ECO:0000269|PubMed:15340161}.
Q9HCB6	SPON1	GO:0007155; GO:0005788; GO:0005615; GO:0046872; GO:0036066; GO:0005578	Evidence at protein level	SUBCELLULAR LOCATION: Secreted, extracellular space, extracellular matrix {ECO:0000250}.			SIGNAL 1 28 {ECO:0000255}.
P61278	SST	GO:0007186; GO:0007166; GO:0007267; GO:0007586; GO:0005576; GO:0005615; GO:0005179; GO:0008628; GO:0006972; GO:0008285; GO:0043025; GO:0030334; GO:0010447; GO:0043200; GO:0042493; GO:0009408; GO:0007584; GO:0048545; GO:0007268	Evidence at protein level	SUBCELLULAR LOCATION: Secreted.			SIGNAL 1 24
Q9BUD6	SPON2	GO:0003823; GO:0007411; GO:0007155; GO:0071222; GO:0050832; GO:0051607; GO:0070062; GO:0005615; GO:0043152; GO:0045087; GO:0001530; GO:0002448; GO:0046872; GO:0008228; GO:0032755; GO:0060907; GO:0032760; GO:0005578	Evidence at protein level	SUBCELLULAR LOCATION: Secreted, extracellular space, extracellular matrix {ECO:0000250}.			SIGNAL 1 26 {ECO:0000255}.
Q13103	SPP2	GO:0046849; GO:0004866; GO:0070062; GO:0005576; GO:0002576; GO:0031089; GO:0001501	Evidence at protein level	SUBCELLULAR LOCATION: Secreted.			SIGNAL 1 29 {ECO:0000255}.
P08294	SOD3	GO:0005796; GO:0005507; GO:0005737; GO:0070062; GO:0031012; GO:0005576; GO:0005615; GO:0008201; GO:0005634; GO:0046688; GO:0001666; GO:0000302; GO:0004784; GO:0005802; GO:0008270	Evidence at protein level	SUBCELLULAR LOCATION: Secreted, extracellular space. Note=99% of EC-SOD is anchored to heparan sulfate proteoglycans in the tissue interstitium, and 1% is located in the vasculature in equilibrium between the plasma and the endothelium.			SIGNAL 1 18
Q9BT56	SPX	GO:0005615; GO:0044539; GO:0032099; GO:0010459; GO:0035814; GO:0005184; GO:0003084; GO:0045944; GO:0051930; GO:0030133; GO:0031765; GO:0031766	Evidence at protein level	SUBCELLULAR LOCATION: Secreted. Secreted, extracellular space. Cytoplasmic vesicle, secretory vesicle. Note=Secreted via the classical ER/Golgi-dependent pathway into the extracellular medium largely as a full-length protein without the signal peptide, and not as a hydrolyzed and amidated peptide (PubMed:19193193 and PubMed:17284679). Localized extracellularly surrounding the villous trophoblasti…			SIGNAL 1 26 {ECO:0000255}.
Q9BQB4	SOST	GO:0005794; GO:0016055; GO:0071374; GO:0005576; GO:0005615; GO:0008201; GO:0030514; GO:2000054; GO:0090090; GO:0030279; GO:0031333; GO:0001503; GO:0045893; GO:0005578; GO:0009612; GO:0008134	Evidence at protein level	SUBCELLULAR LOCATION: Secreted, extracellular space, extracellular matrix {ECO:0000269|PubMed:20551380}.			SIGNAL 1 23 {ECO:0000269|PubMed:15340161}.
Q14515	SPARCL1	GO:0005509; GO:0070062; GO:0005615; GO:0005578; GO:0007165	Evidence at protein level	SUBCELLULAR LOCATION: Secreted, extracellular space, extracellular matrix {ECO:0000250}.			SIGNAL 1 16 {ECO:0000255}.
P10124	SRGN	GO:0005794; GO:0000139; GO:0033371; GO:0031214; GO:0005576; GO:0005615; GO:0008626; GO:0033382; GO:0033373; GO:0042629; GO:0033364; GO:0030502; GO:0050710; GO:0031093; GO:0002576; GO:0033368; GO:0016485; GO:0042588	Evidence at protein level	SUBCELLULAR LOCATION: Cytoplasmic granule {ECO:0000269|PubMed:11154222}. Secreted, extracellular space {ECO:0000269|PubMed:11154222, ECO:0000269|PubMed:16870619}. Golgi apparatus {ECO:0000269|PubMed:11154222, ECO:0000269|PubMed:15136585}. Note=Found in mast cell granules and in cytoplasmic granules of cytolytic T lymphocytes from where it is secreted upon cell activation (By similarity). Secreted…			SIGNAL 1 27 {ECO:0000269|PubMed:3214420, ECO:0000269|PubMed:3402609}.
O60687	SRPX2	GO:0001525; GO:0030054; GO:0048870; GO:0009986; GO:0005737; GO:0060076; GO:0005615; GO:0036458; GO:0042802; GO:0090050; GO:0051965; GO:0005102; GO:0042325; GO:0016337; GO:0097060; GO:0071625	Evidence at protein level	SUBCELLULAR LOCATION: Secreted. Cytoplasm. Cell surface. Cell junction, synapse {ECO:0000250}.			SIGNAL 1 23 {ECO:0000255}.
Q6X4U4	SOSTDC1	GO:0016055; GO:0005615; GO:0031069; GO:0060648; GO:0030514; GO:0090090; GO:0010454; GO:0042475; GO:0007389	Evidence at protein level	SUBCELLULAR LOCATION: Secreted {ECO:0000269|PubMed:15020244}.			SIGNAL 1 23 {ECO:0000269|PubMed:15340161}.
Q8IW75	SERPINA12	GO:0005615; GO:0006006; GO:0045721; GO:0051055; GO:0005886; GO:0046628; GO:0014068; GO:0090181; GO:0090207; GO:0004867	Evidence at protein level	SUBCELLULAR LOCATION: Secreted.			SIGNAL 1 20 {ECO:0000250}.
Q86WD7	SERPINA9	GO:0005737; GO:0005615; GO:0016020; GO:0004867	Evidence at protein level	SUBCELLULAR LOCATION: Isoform 1: Secreted.; SUBCELLULAR LOCATION: Isoform 2: Cytoplasm {ECO:0000305}.; SUBCELLULAR LOCATION: Isoform 3: Cytoplasm {ECO:0000305}.; SUBCELLULAR LOCATION: Isoform 4: Cytoplasm {ECO:0000305}.; SUBCELLULAR LOCATION: Isoform 5: Cytoplasm {ECO:0000305}.; SUBCELLULAR LOCATION: Isoform 6: Cytoplasm {ECO:0000305}.; SUBCELLULAR LOCATION: Isoform 7: Membrane {ECO:0000305}; Sin…			SIGNAL 1 23 {ECO:0000255}.
P02808	STATH	GO:0031214; GO:0042742; GO:0030197; GO:0005576; GO:0046848; GO:0030502; GO:0001503; GO:0046541; GO:0030345	Evidence at protein level	SUBCELLULAR LOCATION: Secreted.			SIGNAL 1 19 {ECO:0000269|PubMed:3476566}.
O76061	STC2	GO:0005794; GO:0006874; GO:0071456; GO:0046697; GO:0007566; GO:0005783; GO:0030968; GO:0019899; GO:0005615; GO:0020037; GO:0010629; GO:0040015; GO:0048471; GO:0042803; GO:0046885; GO:2001256; GO:0006979; GO:0043434; GO:0033280	Evidence at protein level	SUBCELLULAR LOCATION: Secreted {ECO:0000305}.			SIGNAL 1 24 {ECO:0000255}.
Q4LDE5	SVEP1	GO:0005509; GO:0007155; GO:0003682; GO:0005737; GO:0005576; GO:0016020	Evidence at protein level	SUBCELLULAR LOCATION: Secreted {ECO:0000305}. Cytoplasm {ECO:0000269|PubMed:16206243}. Membrane {ECO:0000269|PubMed:16206243}; Peripheral membrane protein {ECO:0000269|PubMed:16206243}.			SIGNAL 1 17 {ECO:0000255}.
A1L4H1	SSC5D	GO:0005737; GO:0050829; GO:0050830; GO:0042494; GO:0031012; GO:0050840; GO:0005615; GO:0001968; GO:0045087; GO:0005622; GO:0043236; GO:0016020; GO:0007275; GO:2000483; GO:0005044	Evidence at protein level	SUBCELLULAR LOCATION: Secreted {ECO:0000250}. Cytoplasm {ECO:0000250}.			SIGNAL 1 16 {ECO:0000255}.
P52823	STC1	GO:0016324; GO:0060348; GO:0006874; GO:0071320; GO:0071385; GO:0071456; GO:0035988; GO:0005737; GO:0046697; GO:0007566; GO:0001886; GO:0005615; GO:0003421; GO:0051926; GO:0030336; GO:0010596; GO:1903403; GO:0005634; GO:0001503; GO:0090280; GO:0044070; GO:0086004; GO:0033280	Evidence at protein level	SUBCELLULAR LOCATION: Secreted.			SIGNAL 1 17 {ECO:0000269|PubMed:15340161}.
M5A8F1	ERVH48-1	GO:0005615; GO:0006949	Evidence at protein level	SUBCELLULAR LOCATION: Secreted {ECO:0000269|PubMed:23492904}. Note=Also found in cell lysates.			SIGNAL 1 39 {ECO:0000255}.
P05452	CLEC3B	GO:0030282; GO:0005509; GO:0030246; GO:0071310; GO:0071560; GO:0005737; GO:0070062; GO:0005576; GO:0005615; GO:0001652; GO:0008201; GO:0036143; GO:0001503; GO:0002576; GO:0031089; GO:0010756	Evidence at protein level	SUBCELLULAR LOCATION: Secreted.			SIGNAL 1 21 {ECO:0000269|PubMed:3427041}.
Q9UQP3	TNN	GO:0007409; GO:0016049; GO:0016477; GO:0009986; GO:0007160; GO:0005578	Evidence at protein level	SUBCELLULAR LOCATION: Secreted, extracellular space, extracellular matrix.			SIGNAL 1 28 {ECO:0000255}.
P04155	TFF1	GO:0005975; GO:0030154; GO:0007586; GO:0005615; GO:0030277; GO:0008285; GO:0035902; GO:0010039; GO:0043434	Evidence at protein level	SUBCELLULAR LOCATION: Secreted {ECO:0000269|PubMed:15924415, ECO:0000269|PubMed:3041593}.			SIGNAL 1 24 {ECO:0000269|PubMed:15340161, ECO:0000269|PubMed:15924415, ECO:0000269|PubMed:16308573, ECO:0000269|PubMed:3146413, ECO:0000269|PubMed:3261981}.
P24821	TNC	GO:0005604; GO:0060447; GO:0007155; GO:0071799; GO:0071300; GO:0071305; GO:0031012; GO:0030198; GO:0005576; GO:0005615; GO:0005925; GO:0005614; GO:0016020; GO:0060739; GO:0007162; GO:0007528; GO:0042475; GO:0001649; GO:0014012; GO:0008284; GO:0010628; GO:0060740; GO:0045471; GO:0071774; GO:0009612; GO:0009611; GO:0045545; GO:0042060	Evidence at protein level	SUBCELLULAR LOCATION: Secreted, extracellular space, extracellular matrix.			SIGNAL 1 22 {ECO:0000269|PubMed:1707164}.
Q7Z7G0	ABI3BP	GO:0030198; GO:0005615; GO:0008201; GO:0005614; GO:0010811	Evidence at protein level	SUBCELLULAR LOCATION: Secreted {ECO:0000305}.			SIGNAL 1 28 {ECO:0000255}.
P61812	TGFB2	GO:0007184; GO:0060395; GO:0032147; GO:0001525; GO:0030424; GO:0007411; GO:0001540; GO:0001974; GO:0060317; GO:0060038; GO:0010002; GO:0001502; GO:0042637; GO:0007050; GO:0008219; GO:0016049; GO:0016477; GO:0000902; GO:0008283; GO:0045216; GO:0007267; GO:0030199; GO:0005125; GO:0042416; GO:0009790; GO:0048566; GO:0003203; GO:0005768; GO:0001837; GO:0031012; GO:0005576; GO:0005615; GO:0097191; GO:…	Evidence at protein level	SUBCELLULAR LOCATION: Secreted.			SIGNAL 1 20 {ECO:0000255}.
P20062	TCN2	GO:0031419; GO:0009235; GO:0015889; GO:0006824; GO:0005768; GO:0070062; GO:0005576; GO:0005615; GO:0043202; GO:0046872	Evidence at protein level	SUBCELLULAR LOCATION: Secreted.			SIGNAL 1 18 {ECO:0000269|PubMed:3782074}.
Q07654	TFF3	GO:0005737; GO:0006952; GO:0007586; GO:0070062; GO:0005576; GO:0005578	Evidence at protein level	SUBCELLULAR LOCATION: Secreted, extracellular space, extracellular matrix {ECO:0000269|PubMed:8454642}. Cytoplasm {ECO:0000269|PubMed:10824705, ECO:0000269|PubMed:8454642}.			SIGNAL 1 21 {ECO:0000269|PubMed:15340161, ECO:0000269|PubMed:19670903}.
Q92752	TNR	GO:0008306; GO:0007411; GO:0007155; GO:0009986; GO:0005737; GO:0030198; GO:0005576; GO:0035641; GO:0060291; GO:0045121; GO:0048692; GO:0022408; GO:0050805; GO:0050885; GO:0007158; GO:0005654; GO:0005634; GO:0072534; GO:0051968; GO:0051971; GO:0005578; GO:0050808; GO:0022029	Evidence at protein level	SUBCELLULAR LOCATION: Secreted, extracellular space, extracellular matrix.			SIGNAL 1 31 {ECO:0000255}.
P01137	TGFB1	GO:0006754; GO:0005796; GO:0000165; GO:0007219; GO:0007183; GO:0007184; GO:0060395; GO:0043029; GO:0046732; GO:0002460; GO:0007568; GO:0003823; GO:0030424; GO:0072562; GO:0060751; GO:0007050; GO:0016049; GO:0016477; GO:0009986; GO:0045216; GO:0006874; GO:0071549; GO:0071407; GO:0071560; GO:0002062; GO:0007182; GO:0002248; GO:0005125; GO:0005737; GO:0009817; GO:0048565; GO:0007492; GO:0019899; GO:…	Evidence at protein level	SUBCELLULAR LOCATION: Secreted, extracellular space, extracellular matrix {ECO:0000269|PubMed:17827158}.			SIGNAL 1 29 {ECO:0000269|PubMed:3162913}.
Q8WUY1	THEM6	GO:0005576	Evidence at protein level	SUBCELLULAR LOCATION: Secreted {ECO:0000305}.			SIGNAL 1 17 {ECO:0000255}.
P20061	TCN1	GO:0031419; GO:0009235; GO:0015889; GO:0006824; GO:0005576; GO:0005615	Evidence at protein level	SUBCELLULAR LOCATION: Secreted.			SIGNAL 1 23
P22105	TNXB	GO:0030036; GO:0007155; GO:0007160; GO:0030199; GO:0032963; GO:0048251; GO:0070062; GO:0043206; GO:0005615; GO:0006631; GO:0008201; GO:0005178; GO:0005622; GO:0005578; GO:0043506; GO:0016337; GO:0006641	Evidence at protein level	SUBCELLULAR LOCATION: Secreted, extracellular space, extracellular matrix.			SIGNAL 1 23 {ECO:0000255}.
P01266	TG	GO:0005794; GO:0043168; GO:0052689; GO:0005783; GO:0005576; GO:0005615; GO:0042446; GO:0015705; GO:0048471; GO:0043234; GO:0031641; GO:0032496; GO:0009268; GO:0007165; GO:0030878; GO:0006590; GO:0045056	Evidence at protein level	SUBCELLULAR LOCATION: Secreted.			SIGNAL 1 19
P16035	TIMP2	GO:0007568; GO:0009986; GO:0007417; GO:0070062; GO:0022617; GO:0005576; GO:0005615; GO:0030426; GO:0046872; GO:0008191; GO:0046580; GO:0008285; GO:0051045; GO:0045930; GO:0043025; GO:0043410; GO:0045762; GO:0045666; GO:0002020; GO:0005578; GO:0032487; GO:0034097; GO:0042493; GO:0009725	Evidence at protein level	SUBCELLULAR LOCATION: Secreted.			SIGNAL 1 26 {ECO:0000269|PubMed:1480041, ECO:0000269|PubMed:1730286, ECO:0000269|PubMed:2793861}.
Q9BQ16	SPOCK3	GO:0005509; GO:0031012; GO:0005615; GO:0005539; GO:0008191; GO:0010951; GO:0019800; GO:0005578; GO:0007165	Evidence at protein level	SUBCELLULAR LOCATION: Secreted, extracellular space, extracellular matrix.			SIGNAL 1 21 {ECO:0000255}.
Q96A98	PTH2	GO:0005576; GO:0007218	Evidence at protein level	SUBCELLULAR LOCATION: Secreted.			SIGNAL 1 30 {ECO:0000255}.
Q86UU9	TAC4	GO:0005623; GO:0007267; GO:0005615; GO:0006954; GO:0007204; GO:0046878; GO:0005102; GO:0008217; GO:0007217	Evidence at protein level	SUBCELLULAR LOCATION: Secreted {ECO:0000305}.			SIGNAL 1 20 {ECO:0000255}.
P48307	TFPI2	GO:0007596; GO:0005201; GO:0005634; GO:0005578; GO:0004867	Evidence at protein level	SUBCELLULAR LOCATION: Secreted.			SIGNAL 1 22 {ECO:0000269|PubMed:3276312, ECO:0000269|PubMed:7872799}.
P10600	TGFB3	GO:0007184; GO:0060395; GO:0030315; GO:0000187; GO:0007568; GO:0016049; GO:0009986; GO:0045216; GO:0005125; GO:0070483; GO:0048565; GO:0048702; GO:0031012; GO:0005576; GO:0005615; GO:0060325; GO:0007565; GO:0060364; GO:0042802; GO:0001701; GO:0048839; GO:0048286; GO:0030879; GO:0008156; GO:0008285; GO:0010936; GO:0043524; GO:0030512; GO:0043025; GO:0005634; GO:0042476; GO:0043932; GO:0060021; GO:…	Evidence at protein level	SUBCELLULAR LOCATION: Secreted.			SIGNAL 1 23 {ECO:0000255}.
P05543	SERPINA7	GO:0070062; GO:0005576; GO:0005615; GO:0004867; GO:0070327	Evidence at protein level	SUBCELLULAR LOCATION: Secreted.			SIGNAL 1 20 {ECO:0000269|PubMed:414747}.
Q92563	SPOCK2	GO:0005509; GO:0050840; GO:0030198; GO:0005539; GO:0019800; GO:0010811; GO:0005578; GO:0045595; GO:0007165; GO:0007416	Evidence at protein level	SUBCELLULAR LOCATION: Secreted, extracellular space, extracellular matrix {ECO:0000305}.			SIGNAL 1 22 {ECO:0000269|PubMed:15340161}.
O95407	TNFRSF6B	GO:0097190; GO:0005576; GO:0005615; GO:0006955; GO:0006954; GO:0005887; GO:0007275; GO:0043066; GO:0043410; GO:0004872; GO:0042127; GO:0032496; GO:0005031; GO:0033209	Evidence at protein level	SUBCELLULAR LOCATION: Secreted.			SIGNAL 1 29 {ECO:0000269|PubMed:10318773}.
Q8N2E6	TOR2A	GO:0005524; GO:0005576	Evidence at protein level	SUBCELLULAR LOCATION: Secreted {ECO:0000269|PubMed:12910263}.			SIGNAL 1 26 {ECO:0000255}.
P00734	F2	GO:0006888; GO:0005796; GO:0006953; GO:0007596; GO:0007597; GO:0072562; GO:0005509; GO:0007166; GO:0044267; GO:0071260; GO:0005788; GO:0070062; GO:0031012; GO:0005576; GO:0005615; GO:0042730; GO:0008083; GO:0050900; GO:0007275; GO:0048712; GO:0051918; GO:0010544; GO:0045861; GO:0017187; GO:0005886; GO:0030168; GO:0030194; GO:0030307; GO:0008284; GO:0032967; GO:0014068; GO:1900738; GO:0001934; GO:…	Evidence at protein level	SUBCELLULAR LOCATION: Secreted, extracellular space.			SIGNAL 1 24 {ECO:0000255}.
P35625	TIMP3	GO:0007568; GO:0005604; GO:0071310; GO:0007417; GO:0070062; GO:0005576; GO:0005615; GO:0046872; GO:0008191; GO:0070373; GO:0051045; GO:1904684; GO:0005634; GO:0002576; GO:0031089; GO:1903984; GO:0002020; GO:0005578; GO:0043627; GO:0051593; GO:0009612; GO:0010033; GO:0042246; GO:0007601	Evidence at protein level	SUBCELLULAR LOCATION: Secreted, extracellular space, extracellular matrix.			SIGNAL 1 23 {ECO:0000269|PubMed:7795886}.
O43897	TLL1	GO:0005509; GO:0030154; GO:0022617; GO:0005576; GO:0004222; GO:0004252; GO:0001501; GO:0008270	Evidence at protein level	SUBCELLULAR LOCATION: Secreted {ECO:0000305}.			SIGNAL 1 30 {ECO:0000255}.
P02787	TF	GO:1990712; GO:0016324; GO:0045178; GO:0009925; GO:0072562; GO:0009986; GO:0006879; GO:0071281; GO:0005905; GO:0016023; GO:0005769; GO:0030139; GO:0010008; GO:0070062; GO:0005576; GO:0005615; GO:0031232; GO:0008199; GO:0015091; GO:0008198; GO:0097460; GO:0055072; GO:0005770; GO:0048471; GO:0002576; GO:0048260; GO:0055037; GO:0031647; GO:0001895; GO:0034774; GO:1990459; GO:0033572; GO:0031982	Evidence at protein level	SUBCELLULAR LOCATION: Secreted.			SIGNAL 1 19 {ECO:0000269|PubMed:6833213}.
Q08629	SPOCK1	GO:0005509; GO:0007155; GO:0021953; GO:0004869; GO:0005737; GO:0005615; GO:0008191; GO:0010812; GO:0010951; GO:0010977; GO:0007399; GO:0022008; GO:0031594; GO:0001764; GO:0033268; GO:0014069; GO:0005578; GO:0001558; GO:0016528; GO:0004867; GO:0007165	Evidence at protein level	SUBCELLULAR LOCATION: Secreted, extracellular space, extracellular matrix.			SIGNAL 1 21 {ECO:0000255}.
Q9UHF0	TAC3	GO:0070062; GO:0005576; GO:0005615; GO:0007565; GO:0007218; GO:0005102; GO:0007217	Evidence at protein level	SUBCELLULAR LOCATION: Secreted.			SIGNAL 1 16 {ECO:0000255}.
Q9Y6L7	TLL2	GO:0005509; GO:0030154; GO:0022617; GO:0005576; GO:0004222; GO:0007275; GO:0048632; GO:0004252; GO:0008270	Evidence at protein level	SUBCELLULAR LOCATION: Secreted {ECO:0000305}.			SIGNAL 1 25 {ECO:0000255}.
P01374	LTA	GO:0006915; GO:0007267; GO:0050830; GO:0005615; GO:0006959; GO:0048535; GO:0048147; GO:0044130; GO:0005886; GO:0043065; GO:0002876; GO:0060252; GO:0002925; GO:0032729; GO:0005102; GO:0042493; GO:0001666; GO:0032496; GO:0007584; GO:0007165; GO:0033209	Evidence at protein level	SUBCELLULAR LOCATION: Secreted. Membrane. Note=The homotrimer is secreted. The heterotrimer is membrane-associated.			SIGNAL 1 34
P01033	TIMP1	GO:0007568; GO:0005604; GO:0051216; GO:0001775; GO:0005125; GO:0070062; GO:0022617; GO:0005576; GO:0005615; GO:0046872; GO:0008191; GO:0043066; GO:0043086; GO:0010951; GO:0051045; GO:1901164; GO:0031093; GO:0002576; GO:0008284; GO:0002020; GO:0005578; GO:2001044; GO:0034097; GO:0009725; GO:0043434; GO:0042060	Evidence at protein level	SUBCELLULAR LOCATION: Secreted {ECO:0000269|PubMed:1730286, ECO:0000269|PubMed:24635319, ECO:0000269|PubMed:3010309, ECO:0000269|PubMed:3839290, ECO:0000269|PubMed:3903517, ECO:0000269|PubMed:8541540}.			SIGNAL 1 23 {ECO:0000269|PubMed:15340161, ECO:0000269|PubMed:1653055, ECO:0000269|PubMed:1730286, ECO:0000269|PubMed:3010309, ECO:0000269|PubMed:3839290, ECO:0000269|PubMed:3903517}.
Q9GZM7	TINAGL1	GO:0007155; GO:0008234; GO:0005737; GO:0016197; GO:0070062; GO:0005201; GO:0005576; GO:0005615; GO:0006955; GO:0030247; GO:0005044	Evidence at protein level	SUBCELLULAR LOCATION: Secreted {ECO:0000269|PubMed:10799322, ECO:0000269|PubMed:11170462}.			SIGNAL 1 21 {ECO:0000269|PubMed:11170462, ECO:0000269|PubMed:15340161}.
P20366	TAC1	GO:0019731; GO:0019732; GO:0008306; GO:0030424; GO:0007267; GO:1990090; GO:0050829; GO:0050830; GO:0009582; GO:0005576; GO:0005615; GO:0006954; GO:0045087; GO:0007320; GO:0007616; GO:0010459; GO:0043025; GO:0007218; GO:0005886; GO:0045760; GO:0002675; GO:2000854; GO:0007204; GO:0010634; GO:0050671; GO:0045778; GO:0035815; GO:0046878; GO:0051496; GO:0032230; GO:0032224; GO:0005102; GO:0008217; GO:…	Evidence at protein level	SUBCELLULAR LOCATION: Secreted.			SIGNAL 1 19 {ECO:0000255}.
P00750	PLAT	GO:0045177; GO:0007596; GO:0009986; GO:0006464; GO:0005737; GO:0070062; GO:0005576; GO:0005615; GO:0042730; GO:0001948; GO:0045861; GO:0051219; GO:0031639; GO:0048008; GO:0006508; GO:0005102; GO:0001666; GO:0030141; GO:0004252; GO:0014909	Evidence at protein level	SUBCELLULAR LOCATION: Secreted, extracellular space.			SIGNAL 1 22 {ECO:0000269|Ref.20}.
O00300	TNFRSF11B	GO:0097190; GO:0005125; GO:0030198; GO:0005576; GO:0005615; GO:0006955; GO:0006954; GO:0005887; GO:0045779; GO:0042489; GO:0005886; GO:0043410; GO:0005578; GO:0004872; GO:0042981; GO:0042127; GO:0046685; GO:0042493; GO:0043627; GO:0032496; GO:0032026; GO:0007584; GO:0007165; GO:0001501; GO:0005031; GO:0033209	Evidence at protein level	SUBCELLULAR LOCATION: Secreted.			SIGNAL 1 21 {ECO:0000269|PubMed:15340161, ECO:0000269|PubMed:9571159}.
P02788	LTF	GO:0003677; GO:0019731; GO:0019732; GO:0060349; GO:0045454; GO:0009986; GO:0044267; GO:0005737; GO:0070062; GO:0005576; GO:0005615; GO:0008201; GO:0006959; GO:0002227; GO:0006811; GO:0033214; GO:0005506; GO:0044793; GO:0032780; GO:0043066; GO:0031665; GO:2001205; GO:1900229; GO:2000308; GO:0045071; GO:0048525; GO:0005634; GO:0001503; GO:0097013; GO:0043123; GO:0051092; GO:1900159; GO:1902732; GO:…	Evidence at protein level	SUBCELLULAR LOCATION: Isoform 1: Secreted. Cytoplasmic granule. Note=Secreted into most exocrine fluids by various endothelial cells. Stored in the secondary granules of neutrophils.; SUBCELLULAR LOCATION: Isoform DeltaLf: Cytoplasm. Nucleus. Note=Mainly localized in the cytoplasm.			SIGNAL 1 19 {ECO:0000269|PubMed:14573629}.
Q15661	TPSAB1	GO:0006952; GO:0022617; GO:0005576; GO:0005615; GO:0004252; GO:0008236	Evidence at protein level	SUBCELLULAR LOCATION: Secreted. Note=Released from the secretory granules upon mast cell activation. {ECO:0000250}.			SIGNAL 1 18 {ECO:0000255}.
P40225	THPO	GO:0008283; GO:0005615; GO:0008083; GO:0007275; GO:0030099; GO:0070374; GO:1902035; GO:0045654; GO:0051897; GO:0001934; GO:0038163	Evidence at protein level	SUBCELLULAR LOCATION: Secreted.			SIGNAL 1 21
P07478	PRSS2	GO:0005509; GO:0030574; GO:0007586; GO:0031012; GO:0022617; GO:0005576; GO:0005615; GO:0045785; GO:0030307; GO:0006508; GO:0004252; GO:0008236	Evidence at protein level	SUBCELLULAR LOCATION: Secreted, extracellular space.			SIGNAL 1 15 {ECO:0000269|PubMed:2598466}.
P35443	THBS4	GO:0005604; GO:0048266; GO:0005509; GO:0005783; GO:0071603; GO:0070062; GO:0031012; GO:0005576; GO:0005615; GO:0008201; GO:0005178; GO:0051451; GO:0016525; GO:0031594; GO:0048812; GO:0051781; GO:0001938; GO:0090023; GO:0050731; GO:0051260; GO:0034103; GO:0034976; GO:0006986; GO:0016529; GO:0048771	Evidence at protein level	SUBCELLULAR LOCATION: Endoplasmic reticulum {ECO:0000250|UniProtKB:Q9Z1T2}. Sarcoplasmic reticulum {ECO:0000250|UniProtKB:Q9Z1T2}. Secreted {ECO:0000250|UniProtKB:Q9Z1T2}. Secreted, extracellular space {ECO:0000250|UniProtKB:Q9Z1T2}. Secreted, extracellular space, extracellular matrix {ECO:0000250|UniProtKB:Q9Z1T2}.			SIGNAL 1 26 {ECO:0000255}.
P20396	TRH	GO:0007628; GO:0007267; GO:0042755; GO:0005576; GO:0001692; GO:0009755; GO:2000252; GO:0014050; GO:0005634; GO:0005886; GO:0014054; GO:0032024; GO:0009409; GO:0051412; GO:0045471; GO:0009749; GO:0001666; GO:0030141; GO:0007165; GO:0008437	Evidence at protein level	SUBCELLULAR LOCATION: Secreted.			SIGNAL 1 24 {ECO:0000255}.
P07477	PRSS1	GO:0072562; GO:0009235; GO:0007586; GO:0070062; GO:0022617; GO:0005576; GO:0046872; GO:0004252; GO:0008236	Evidence at protein level	SUBCELLULAR LOCATION: Secreted, extracellular space.			SIGNAL 1 15 {ECO:0000269|PubMed:2598466, ECO:0000269|PubMed:7945238}.
P35030	PRSS3	GO:0005509; GO:0009235; GO:0007586; GO:0043542; GO:0070062; GO:0005576; GO:0005615; GO:0006508; GO:0004252; GO:0008236; GO:0031638	Evidence at protein level	SUBCELLULAR LOCATION: Secreted.			SIGNAL 1 ? {ECO:0000255}.
P01222	TSHB	GO:0007186; GO:0009653; GO:0007267; GO:0005576; GO:0005179; GO:0016486; GO:0051592; GO:0043627; GO:0033189	Evidence at protein level	SUBCELLULAR LOCATION: Secreted.			SIGNAL 1 20 {ECO:0000269|PubMed:890569}.
Q969D9	TSLP	GO:0005615	Evidence at protein level	SUBCELLULAR LOCATION: Secreted {ECO:0000269|PubMed:11418668}.			SIGNAL 1 28 {ECO:0000255}.
P02766	TTR	GO:0044267; GO:0005737; GO:0070062; GO:0030198; GO:0005576; GO:0005615; GO:0042562; GO:0042802; GO:0043234; GO:0001523; GO:0042572; GO:0006810	Evidence at protein level	SUBCELLULAR LOCATION: Secreted. Cytoplasm.			SIGNAL 1 20 {ECO:0000269|PubMed:12665801, ECO:0000269|PubMed:1517749, ECO:0000269|PubMed:3135807, ECO:0000269|PubMed:4607556, ECO:0000269|PubMed:6583672, ECO:0000269|PubMed:6651852}.
Q9GZX9	TWSG1	GO:0030509; GO:0043010; GO:0030154; GO:0070062; GO:0005615; GO:0030900; GO:0030097; GO:0001707; GO:0030514; GO:0045668; GO:0001503; GO:0030513; GO:0007435	Evidence at protein level	SUBCELLULAR LOCATION: Secreted {ECO:0000250}.			SIGNAL 1 25 {ECO:0000255}.
Q969E3	UCN3	GO:0001664; GO:0007189; GO:0031669; GO:0007586; GO:0005615; GO:0006950	Evidence at protein level	SUBCELLULAR LOCATION: Secreted.			SIGNAL 1 21 {ECO:0000255}.
P55089	UCN	GO:0007186; GO:0034199; GO:0009060; GO:0008306; GO:0043679; GO:0030425; GO:0042756; GO:0005576; GO:0007565; GO:0035483; GO:0046811; GO:0006954; GO:0043066; GO:0032099; GO:0045776; GO:0045792; GO:2000252; GO:0060455; GO:0010629; GO:0046888; GO:0060547; GO:1901215; GO:0031175; GO:0005184; GO:0007218; GO:0030157; GO:0043204; GO:0045740; GO:2000987; GO:0030819; GO:0090280; GO:0060452; GO:0030307; GO:…	Evidence at protein level	SUBCELLULAR LOCATION: Secreted.			SIGNAL 1 25 {ECO:0000255}.
P00749	PLAU	GO:0001525; GO:0007596; GO:0009986; GO:0071498; GO:0071333; GO:0035729; GO:0071456; GO:0071222; GO:0072734; GO:0006935; GO:0007566; GO:0070062; GO:0005576; GO:0005615; GO:0042730; GO:0005925; GO:0070997; GO:0005886; GO:0030335; GO:0008284; GO:0060279; GO:2000379; GO:0014911; GO:0006508; GO:0033628; GO:2000345; GO:0010469; GO:0014910; GO:2000097; GO:0061041; GO:0014823; GO:0055093; GO:0004252; GO:…	Evidence at protein level	SUBCELLULAR LOCATION: Secreted.			SIGNAL 1 20 {ECO:0000269|PubMed:2023947, ECO:0000269|PubMed:6754569}.
P11684	SCGB1A1	GO:0007566; GO:0070062; GO:0005615; GO:0007565; GO:0042130; GO:0032689; GO:0032696; GO:0032713; GO:0032714; GO:0000122; GO:0005635; GO:0019834; GO:0097160; GO:0050727; GO:0043488; GO:0034097; GO:0042493; GO:0071774; GO:0051384; GO:0032496; GO:0010193; GO:0034021; GO:0009410; GO:0005791; GO:0030141; GO:0007165	Evidence at protein level	SUBCELLULAR LOCATION: Secreted.			SIGNAL 1 21 {ECO:0000269|PubMed:11788998, ECO:0000269|PubMed:1395029, ECO:0000269|PubMed:1400743}.
O95399	UTS2	GO:0005829; GO:0005576; GO:0005615; GO:0005179; GO:0006936; GO:0045776; GO:0003105; GO:0010459; GO:0046676; GO:0035814; GO:0035811; GO:0045766; GO:0045777; GO:0045597; GO:0046005; GO:0010841; GO:0032967; GO:0007204; GO:0010763; GO:0048146; GO:0010460; GO:0032224; GO:0045909; GO:0005102; GO:0008217; GO:0042493; GO:0001666; GO:0033574; GO:0007268	Evidence at protein level	SUBCELLULAR LOCATION: Secreted.			SIGNAL 1 20
Q96RP3	UCN2	GO:0001664; GO:0007189; GO:0006171; GO:0008283; GO:0071385; GO:0071456; GO:0031669; GO:0007586; GO:0005576; GO:0005615; GO:0042562; GO:0046882; GO:0010629; GO:0033685; GO:0005102; GO:0035902; GO:0006950	Evidence at protein level	SUBCELLULAR LOCATION: Secreted.			SIGNAL 1 22 {ECO:0000250}.
P49765	VEGFB	GO:0001525; GO:0060048; GO:0042056; GO:0060976; GO:0005576; GO:0005615; GO:0008201; GO:0050930; GO:0016020; GO:0043066; GO:0010629; GO:0043524; GO:0031093; GO:0002576; GO:0070374; GO:0051781; GO:0001938; GO:0060754; GO:0050731; GO:0051897; GO:0030949; GO:0035470; GO:0006493; GO:0042493; GO:0043183; GO:0048010	Evidence at protein level	SUBCELLULAR LOCATION: Secreted. Note=Secreted but remains associated to cells or to the extracellular matrix unless released by heparin.			SIGNAL 1 21 {ECO:0000255}.
O15240	VGF	GO:0033500; GO:0031410; GO:0042742; GO:0005615; GO:0006091; GO:0042593; GO:0005179; GO:0030073; GO:0043231; GO:0001541; GO:0048167; GO:0051591; GO:0009409; GO:0002021; GO:0032868; GO:0019953; GO:0030133	Evidence at protein level	SUBCELLULAR LOCATION: Secreted {ECO:0000269|PubMed:19194657}. Cytoplasmic vesicle, secretory vesicle {ECO:0000269|PubMed:19194657}. Note=Stored in secretory vesicles and then secreted, NERP peptides colocalize with vasopressin in the storage granules of hypothalamus.			SIGNAL 1 22 {ECO:0000255}.
P01282	VIP	GO:0007186; GO:0019731; GO:0019732; GO:0007589; GO:0050829; GO:0050830; GO:0005576; GO:0005179; GO:0045087; GO:0007611; GO:0048255; GO:0043066; GO:0043267; GO:0048662; GO:0043025; GO:0005184; GO:0010579; GO:0008284; GO:0001938; GO:0060406; GO:0045732; GO:0045909; GO:0070459; GO:0032880; GO:0051930; GO:0001878	Evidence at protein level	SUBCELLULAR LOCATION: Secreted.			SIGNAL 1 20 {ECO:0000255}.
Q6UXB2	CXCL17	GO:0001525; GO:0030154; GO:0006935; GO:0005576	Evidence at protein level	SUBCELLULAR LOCATION: Secreted.			SIGNAL 1 21 {ECO:0000269|PubMed:15340161}.
O43915	VEGFD	GO:0001525; GO:0008283; GO:0042056; GO:0071542; GO:0005576; GO:0005615; GO:0050930; GO:0016020; GO:0031093; GO:0002576; GO:0005161; GO:0051781; GO:0008284; GO:0032755; GO:0060754; GO:0030947; GO:0001666; GO:0070555; GO:0005172; GO:0048010	Evidence at protein level	SUBCELLULAR LOCATION: Secreted.			SIGNAL 1 21 {ECO:0000255}.
P15692	VEGFA	GO:0038190; GO:0032147; GO:0001525; GO:0048844; GO:0002575; GO:0048754; GO:0048593; GO:0048739; GO:0060948; GO:0048469; GO:0002042; GO:0009986; GO:0071456; GO:0035924; GO:0042056; GO:0071679; GO:0060982; GO:0003169; GO:0005125; GO:0005737; GO:0071542; GO:0035767; GO:0030855; GO:0050840; GO:0005576; GO:0005615; GO:0042462; GO:0001968; GO:0040007; GO:0008083; GO:0003007; GO:0008201; GO:0042802; GO:…	Evidence at protein level	SUBCELLULAR LOCATION: Secreted {ECO:0000269|PubMed:11563986, ECO:0000269|PubMed:11731620, ECO:0000269|PubMed:15896327}. Note=VEGF121 is acidic and freely secreted. VEGF165 is more basic, has heparin-binding properties and, although a signicant proportion remains cell-associated, most is freely secreted. VEGF189 is very basic, it is cell-associated after secretion and is bound avidly by heparin an…			SIGNAL 1 26 {ECO:0000269|PubMed:15340161, ECO:0000269|PubMed:7678805}.
P02774	GC	GO:0003779; GO:0030424; GO:0072562; GO:1902118; GO:0005829; GO:0070062; GO:0005576; GO:0005615; GO:0007565; GO:0007595; GO:0043202; GO:0048471; GO:0032355; GO:0031667; GO:0005499; GO:0042359; GO:0051180; GO:0051183	Evidence at protein level	SUBCELLULAR LOCATION: Secreted.			SIGNAL 1 16 {ECO:0000269|PubMed:218624, ECO:0000269|PubMed:2423133}.
Q8NEX5	WFDC9	GO:0005576	Evidence at protein level	SUBCELLULAR LOCATION: Secreted {ECO:0000305}.			SIGNAL 1 23 {ECO:0000255}.
O95388	WISP1	GO:0016055; GO:0007155; GO:0007267; GO:0005737; GO:0005615; GO:0008201; GO:0005178; GO:0060548; GO:0005578; GO:0001558; GO:0007165	Evidence at protein level	SUBCELLULAR LOCATION: Secreted.			SIGNAL 1 22 {ECO:0000255}.
P56705	WNT4	GO:0005796; GO:0016055; GO:0030325; GO:0006702; GO:0001658; GO:0060070; GO:0045165; GO:0009986; GO:0009267; GO:0071560; GO:0005737; GO:0001838; GO:0030666; GO:0005788; GO:0001837; GO:0090002; GO:0070062; GO:0005576; GO:0005615; GO:0008585; GO:0030237; GO:0005109; GO:0033080; GO:0001822; GO:0001889; GO:0008584; GO:0061180; GO:0060231; GO:0072162; GO:0072273; GO:0072174; GO:2001234; GO:0090090; GO:…	Evidence at protein level	SUBCELLULAR LOCATION: Secreted, extracellular space, extracellular matrix.			SIGNAL 1 22 {ECO:0000255}.
O00755	WNT7A	GO:0005796; GO:0016055; GO:0035659; GO:0001525; GO:0008105; GO:0007409; GO:0060070; GO:0001502; GO:0045165; GO:0021846; GO:0009986; GO:0071560; GO:0022009; GO:0021707; GO:0002062; GO:0005125; GO:0005829; GO:0060997; GO:0009953; GO:0000578; GO:0042733; GO:0035115; GO:0035116; GO:0030666; GO:0005788; GO:0030010; GO:1904861; GO:0070062; GO:0005576; GO:0005615; GO:0005109; GO:0070307; GO:0043066; GO:…	Evidence at protein level	SUBCELLULAR LOCATION: Secreted, extracellular space, extracellular matrix.			SIGNAL 1 31 {ECO:0000255}.
Q9UBD3	XCL2	GO:0048020; GO:0007186; GO:0008015; GO:0071346; GO:0071347; GO:0071356; GO:0008009; GO:0070098; GO:0005576; GO:0005615; GO:0006954; GO:0048247; GO:0002548; GO:0030593; GO:0070374; GO:0043547; GO:0050729; GO:0007165	Evidence at protein level	SUBCELLULAR LOCATION: Secreted.			SIGNAL 1 21 {ECO:0000269|PubMed:15340161}.
P49767	VEGFC	GO:0001525; GO:0042056; GO:0005576; GO:0005615; GO:0050930; GO:0016020; GO:0016331; GO:0045776; GO:0008285; GO:0009887; GO:0031093; GO:0002576; GO:0045766; GO:0043536; GO:0051781; GO:0008284; GO:0001954; GO:0050679; GO:1901492; GO:0060754; GO:0002052; GO:0050731; GO:0031954; GO:0050714; GO:0030947; GO:0042493; GO:0007165; GO:0006929; GO:0048010	Evidence at protein level	SUBCELLULAR LOCATION: Secreted.			SIGNAL 1 31 {ECO:0000269|PubMed:15340161, ECO:0000269|PubMed:9233800}.
P04275	VWF	GO:0033093; GO:0007596; GO:0007597; GO:0007155; GO:0031589; GO:0051087; GO:0005518; GO:0005783; GO:0070062; GO:0031012; GO:0030198; GO:0005576; GO:0001948; GO:0007599; GO:0042802; GO:0019865; GO:0005178; GO:0030168; GO:0031091; GO:0031093; GO:0002576; GO:0002020; GO:0047485; GO:0042803; GO:0051260; GO:0005578; GO:0035902; GO:0009611	Evidence at protein level	SUBCELLULAR LOCATION: Secreted {ECO:0000269|PubMed:10961880}. Secreted, extracellular space, extracellular matrix {ECO:0000269|PubMed:10961880}. Note=Localized to storage granules.			SIGNAL 1 22 {ECO:0000269|PubMed:3495266}.
O76076	WISP2	GO:0007155; GO:0007267; GO:0070062; GO:0005615; GO:0008201; GO:0005178; GO:0060548; GO:0005578; GO:0001558; GO:0007165	Evidence at protein level	SUBCELLULAR LOCATION: Secreted {ECO:0000305}.			SIGNAL 1 23 {ECO:0000269|PubMed:15340161}.
Q93097	WNT2B	GO:0016055; GO:0060070; GO:0045165; GO:0009267; GO:0002062; GO:0061303; GO:0005576; GO:0005615; GO:0021871; GO:0005109; GO:0071425; GO:0061072; GO:0002088; GO:0060492; GO:0008584; GO:0060638; GO:0030182; GO:0090190; GO:0090263; GO:0005578	Evidence at protein level	SUBCELLULAR LOCATION: Secreted, extracellular space, extracellular matrix.			SIGNAL 1 ? {ECO:0000255}.
Q5TIE3	VWA5B1	GO:0005576	Evidence at protein level	SUBCELLULAR LOCATION: Secreted {ECO:0000305}.			SIGNAL 1 18 {ECO:0000255}.
Q6PCB0	VWA1	GO:0005604; GO:0048266; GO:0070062; GO:0030198; GO:0005615; GO:0005614	Evidence at protein level	SUBCELLULAR LOCATION: Secreted, extracellular space, extracellular matrix, basement membrane {ECO:0000250|UniProtKB:Q8R2Z5}.			SIGNAL 1 22 {ECO:0000255}.
O96014	WNT11	GO:0005096; GO:0016055; GO:0007223; GO:0060071; GO:0030325; GO:0048844; GO:0070830; GO:0030282; GO:0060070; GO:0045165; GO:0071300; GO:0060197; GO:0060028; GO:0005737; GO:0048706; GO:0001837; GO:0005576; GO:0005615; GO:0005109; GO:0060484; GO:0045199; GO:0072177; GO:0043066; GO:0090090; GO:0061037; GO:0060548; GO:0030308; GO:0030336; GO:0090272; GO:0072201; GO:0045892; GO:0061101; GO:0030182; GO:…	Evidence at protein level	SUBCELLULAR LOCATION: Secreted, extracellular space, extracellular matrix.			SIGNAL 1 24 {ECO:0000255}.
P04628	WNT1	GO:0005796; GO:0060061; GO:0033077; GO:0016055; GO:1904953; GO:0060071; GO:1904886; GO:0060348; GO:0001658; GO:0060070; GO:1904954; GO:0044336; GO:0045165; GO:0033278; GO:0009986; GO:0007267; GO:0071375; GO:0021551; GO:0021588; GO:0005125; GO:0005737; GO:0021536; GO:0000578; GO:1990403; GO:0030666; GO:0005788; GO:0070062; GO:0005576; GO:0005615; GO:0021797; GO:0005109; GO:0071425; GO:0070365; GO:…	Evidence at protein level	SUBCELLULAR LOCATION: Secreted, extracellular space, extracellular matrix.			SIGNAL 1 27 {ECO:0000255}.
P56704	WNT3A	GO:0010387; GO:0005796; GO:0016055; GO:0021874; GO:1904953; GO:1990851; GO:0090245; GO:0007411; GO:1904886; GO:0060070; GO:0061317; GO:0021846; GO:0033278; GO:0009986; GO:0034613; GO:0071300; GO:0039706; GO:0005829; GO:0021904; GO:0031901; GO:0030666; GO:0005788; GO:0070062; GO:0030198; GO:0005576; GO:0005615; GO:0005109; GO:0001947; GO:0030097; GO:0021766; GO:0001701; GO:0042472; GO:0030879; GO:…	Evidence at protein level	SUBCELLULAR LOCATION: Secreted, extracellular space, extracellular matrix.			SIGNAL 1 18 {ECO:0000255}.
A3KMH1	VWA8	GO:0005524; GO:0016887; GO:0005576; GO:0005739	Evidence at protein level	SUBCELLULAR LOCATION: Secreted {ECO:0000305}.			SIGNAL 1 15 {ECO:0000255}.
Q96NZ8	WFIKKN1	GO:0005576; GO:0008191; GO:0048747; GO:0043392; GO:0032091; GO:0060021; GO:0004867; GO:0001501	Evidence at protein level	SUBCELLULAR LOCATION: Secreted {ECO:0000250}.			SIGNAL 1 19 {ECO:0000255}.
Q9GZT5	WNT10A	GO:0016055; GO:0045165; GO:0071560; GO:0048730; GO:0005576; GO:0005615; GO:0005109; GO:0001942; GO:0031069; GO:0014033; GO:0030182; GO:0042476; GO:0010628; GO:0005578; GO:0042487; GO:0048733; GO:0043588; GO:0043586	Evidence at protein level	SUBCELLULAR LOCATION: Secreted, extracellular space, extracellular matrix.			SIGNAL 1 35 {ECO:0000255}.
Q9Y6F9	WNT6	GO:0005796; GO:0016055; GO:0009798; GO:0001658; GO:0045165; GO:0009986; GO:0071300; GO:0061303; GO:0030666; GO:0005788; GO:0060684; GO:0070062; GO:0005576; GO:0005615; GO:0005109; GO:0072079; GO:0030182; GO:0042475; GO:0005886; GO:0010628; GO:0070172; GO:0045893; GO:0005578	Evidence at protein level	SUBCELLULAR LOCATION: Secreted, extracellular space, extracellular matrix.			SIGNAL 1 24 {ECO:0000255}.
O15537	RS1	GO:0016062; GO:0007155; GO:0005615; GO:0019897; GO:0007275; GO:0005547; GO:0043325; GO:0080025; GO:0032266; GO:0005546; GO:0070273; GO:0010314; GO:0001786; GO:0010842; GO:0007601	Evidence at protein level	SUBCELLULAR LOCATION: Secreted {ECO:0000269|PubMed:10915776}.			SIGNAL 1 23 {ECO:0000255}.
P04004	VTN	GO:0071062; GO:0072562; GO:0007155; GO:0033627; GO:0007160; GO:0035987; GO:0070062; GO:0031012; GO:0050840; GO:0030198; GO:0005576; GO:0005615; GO:0008201; GO:0006955; GO:0005178; GO:0030195; GO:0010951; GO:0048709; GO:0030247; GO:0010811; GO:0050731; GO:0032092; GO:0048260; GO:0014911; GO:0030949; GO:0090303; GO:0005578; GO:0030449; GO:0005044; GO:0061302	Evidence at protein level	SUBCELLULAR LOCATION: Secreted, extracellular space.			SIGNAL 1 19 {ECO:0000269|PubMed:631332, ECO:0000269|PubMed:7522053}.
Q5GFL6	VWA2	GO:0005604; GO:0005509; GO:0007161; GO:0070062; GO:0005615; GO:0042802; GO:0051260; GO:0046626	Evidence at protein level	SUBCELLULAR LOCATION: Secreted.			SIGNAL 1 23 {ECO:0000255}.
Q14508	WFDC2	GO:0019828; GO:0004869; GO:0004866; GO:0070062; GO:0005615; GO:0006508; GO:0004867; GO:0007283	Evidence at protein level	SUBCELLULAR LOCATION: Secreted {ECO:0000269|PubMed:15781627, ECO:0000269|PubMed:23139753}.			SIGNAL 1 30 {ECO:0000255}.
Q8TEU8	WFIKKN2	GO:0005576; GO:0008191; GO:0048747; GO:0043392; GO:0032091; GO:0060021; GO:0004867; GO:0001501; GO:0007179	Evidence at protein level	SUBCELLULAR LOCATION: Secreted {ECO:0000250}.			SIGNAL 1 34 {ECO:0000250}.
O95389	CCN6	GO:0007155; GO:0007267; GO:0005615; GO:0008201; GO:0005178; GO:0060548; GO:0005578; GO:0001558; GO:0007165	Evidence at protein level	SUBCELLULAR LOCATION: Secreted {ECO:0000305}.			SIGNAL 1 23 {ECO:0000255}.
P56703	WNT3	GO:0005796; GO:0060064; GO:0016055; GO:1990909; GO:0009948; GO:0007411; GO:0060070; GO:0044338; GO:0044339; GO:0045165; GO:0000902; GO:0071300; GO:0009950; GO:0035115; GO:0035116; GO:0030666; GO:0005788; GO:0070062; GO:0005576; GO:0005615; GO:0005109; GO:0007276; GO:0060323; GO:0060174; GO:0061180; GO:0001707; GO:0048843; GO:0030182; GO:0005886; GO:0030177; GO:0048697; GO:0010628; GO:0005578; GO:…	Evidence at protein level	SUBCELLULAR LOCATION: Secreted, extracellular space, extracellular matrix.			SIGNAL 1 21 {ECO:0000255}.
P41221	WNT5A	GO:0005796; GO:0016055; GO:1904953; GO:0007223; GO:0060071; GO:0090630; GO:0007257; GO:0000187; GO:0032148; GO:0008595; GO:0007411; GO:0060070; GO:0051216; GO:0045165; GO:0009986; GO:0034613; GO:0071277; GO:0071346; GO:0071222; GO:0071300; GO:0071560; GO:0060067; GO:1902379; GO:0036517; GO:0036518; GO:0030669; GO:0090103; GO:0060028; GO:0060029; GO:0042733; GO:0048706; GO:0030666; GO:0005788; GO:…	Evidence at protein level	SUBCELLULAR LOCATION: Secreted, extracellular space, extracellular matrix.			SIGNAL 1 35 {ECO:0000255}.
O14905	WNT9B	GO:0016055; GO:0060071; GO:0001658; GO:0060070; GO:0045165; GO:0007267; GO:0071300; GO:0009267; GO:0072044; GO:0061303; GO:0048701; GO:0072046; GO:0005576; GO:0005615; GO:0005109; GO:0001701; GO:0072003; GO:0030539; GO:0072038; GO:0072181; GO:0072174; GO:0007275; GO:0030182; GO:0060021; GO:0043085; GO:0005578; GO:0009786; GO:0003339; GO:0001932; GO:0035150; GO:0032526; GO:0061038	Evidence at protein level	SUBCELLULAR LOCATION: Secreted, extracellular space, extracellular matrix.			SIGNAL 1 22 {ECO:0000255}.
P47992	XCL1	GO:0048020; GO:0007186; GO:0007267; GO:0071346; GO:0071347; GO:0071353; GO:0071560; GO:0071356; GO:0008009; GO:0042379; GO:0070098; GO:0005576; GO:0005615; GO:0005622; GO:0035782; GO:0002548; GO:2000562; GO:0002725; GO:2000518; GO:0002826; GO:0032689; GO:0032703; GO:0043433; GO:0045892; GO:0030593; GO:2000538; GO:2000563; GO:2000566; GO:0070374; GO:0043547; GO:0010820; GO:0002726; GO:0001916; GO:…	Evidence at protein level	SUBCELLULAR LOCATION: Secreted.			SIGNAL 1 21 {ECO:0000255}.
Q9Y5W5	WIF1	GO:0016055; GO:0017147; GO:0005576; GO:0007275; GO:0030178; GO:0045600; GO:0007165	Evidence at protein level	SUBCELLULAR LOCATION: Secreted.			SIGNAL 1 28 {ECO:0000255}.
O00744	WNT10B	GO:0000086; GO:0016055; GO:0060346; GO:0060070; GO:0007050; GO:0045165; GO:0071320; GO:0071464; GO:0071374; GO:0071300; GO:0002062; GO:0005576; GO:0005615; GO:0005109; GO:0061196; GO:0071425; GO:0006629; GO:0014835; GO:0050680; GO:0045599; GO:0000122; GO:0030182; GO:0010971; GO:0045899; GO:0051885; GO:0043065; GO:0030501; GO:0090263; GO:0008284; GO:0030858; GO:0045669; GO:0051091; GO:0050821; GO:…	Evidence at protein level	SUBCELLULAR LOCATION: Secreted, extracellular space, extracellular matrix.			SIGNAL 1 28 {ECO:0000255}.
Q9UK55	SERPINA10	GO:0008218; GO:0007596; GO:0070062; GO:0005615; GO:0008201; GO:0004867	Evidence at protein level	SUBCELLULAR LOCATION: Secreted.			SIGNAL 1 21 {ECO:0000269|PubMed:9689066}.
P25311	AZGP1	GO:0042612; GO:0003823; GO:0019882; GO:0002474; GO:0007155; GO:0001580; GO:0070062; GO:0005576; GO:0005615; GO:0001948; GO:0006955; GO:0008285; GO:0005634; GO:0042605; GO:0005886; GO:0008320; GO:0001895; GO:0004540; GO:0055085	Evidence at protein level	SUBCELLULAR LOCATION: Secreted.			SIGNAL 1 20 {ECO:0000269|PubMed:15340161, ECO:0000269|PubMed:3422450}.
O60844	ZG16	GO:0005796; GO:0030246; GO:0060205; GO:0031012; GO:0015031; GO:0005578; GO:0042589	Evidence at protein level	SUBCELLULAR LOCATION: Secreted, extracellular space, extracellular matrix {ECO:0000269|PubMed:17307141}. Cytoplasmic vesicle lumen {ECO:0000305|PubMed:17307141}. Golgi apparatus lumen {ECO:0000269|PubMed:17307141}. Note=Stored in zymogen granules. {ECO:0000250}.			SIGNAL 1 16 {ECO:0000269|PubMed:15340161}.
Q96DA0	ZG16B	GO:0030246; GO:0070062; GO:0005615; GO:0001895	Evidence at protein level	SUBCELLULAR LOCATION: Secreted {ECO:0000305}.			SIGNAL 1 52 {ECO:0000255}.
A0A0D9SGA7	CGA	GO:0005576	Evidence at protein level	SUBCELLULAR LOCATION: Secreted {ECO:0000256|RuleBase:RU362129, ECO:0000256|SAAS:SAAS00521609}.			SIGNAL 1 24 {ECO:0000256|RuleBase:RU362129}.
Q4VXY6	COL11A2	GO:0002062; GO:0005581; GO:0005201; GO:0005578; GO:0005840; GO:0048705; GO:0001894	Evidence at protein level	SUBCELLULAR LOCATION: Secreted, extracellular space, extracellular matrix {ECO:0000256|SAAS:SAAS00565546}.			SIGNAL 1 22 {ECO:0000256|SAM:SignalP}.
F5H6I0	B2M	GO:0042612; GO:0002474; GO:0005576; GO:0006955	Evidence at protein level	SUBCELLULAR LOCATION: Secreted {ECO:0000256|SAAS:SAAS00359205}.			SIGNAL 1 20 {ECO:0000256|SAM:SignalP}.
A0A087X089	CCL14	GO:0060326; GO:0005615; GO:0006955	Evidence at protein level	SUBCELLULAR LOCATION: Secreted {ECO:0000256|RuleBase:RU361150}.			SIGNAL 1 23 {ECO:0000256|RuleBase:RU361150}.
Q4VAQ0	COL8A2	GO:0005581; GO:0005576	Evidence at protein level	SUBCELLULAR LOCATION: Secreted {ECO:0000256|SAAS:SAAS00562217}.			SIGNAL 1 21 {ECO:0000256|SAM:SignalP}.
H3BRW4	PLA2G10	GO:0005509; GO:0005576; GO:0016042; GO:0004623	Evidence at protein level	SUBCELLULAR LOCATION: Secreted {ECO:0000256|RuleBase:RU361236}.			SIGNAL 1 31 {ECO:0000256|RuleBase:RU361236}.
A0A0G2JPR0	C4A	GO:0006956; GO:0004866; GO:0005615; GO:0006954	Evidence at protein level	SUBCELLULAR LOCATION: Secreted {ECO:0000256|SAAS:SAAS00562025}.			SIGNAL 1 19 {ECO:0000256|SAM:SignalP}.
Q13429	IGF-I	GO:0005615; GO:0060283; GO:0010560; GO:0050714; GO:0050821; GO:0030166; GO:0010468	Evidence at protein level	SUBCELLULAR LOCATION: Secreted {ECO:0000256|RuleBase:RU000406}.			SIGNAL 1 29 {ECO:0000256|SAM:SignalP}.
B4DTR8	LIPG	GO:0005576; GO:0006629; GO:0004465	Evidence at protein level	SUBCELLULAR LOCATION: Secreted {ECO:0000256|SAAS:SAAS00553472}.			SIGNAL 1 20 {ECO:0000256|SAM:SignalP}.
Q5I0G2	PRL	GO:0005576	Evidence at protein level	SUBCELLULAR LOCATION: Secreted {ECO:0000256|RuleBase:RU003618, ECO:0000256|SAAS:SAAS00585560}.			SIGNAL 1 29 {ECO:0000256|SAM:SignalP}.
B1A4G9	GH1	GO:0005576	Evidence at protein level	SUBCELLULAR LOCATION: Secreted {ECO:0000256|RuleBase:RU003618, ECO:0000256|SAAS:SAAS00585560}.			SIGNAL 1 26 {ECO:0000256|SAM:SignalP}.
B1A4H2	CSH1	GO:0005576	Evidence at protein level	SUBCELLULAR LOCATION: Secreted {ECO:0000256|RuleBase:RU003618, ECO:0000256|SAAS:SAAS00585560}.			SIGNAL 1 26 {ECO:0000256|SAM:SignalP}.
H0YIS1	COL11A2	GO:0005581; GO:0005201; GO:0005578	Evidence at protein level	SUBCELLULAR LOCATION: Secreted, extracellular space, extracellular matrix {ECO:0000256|SAAS:SAAS00565546}.			SIGNAL 1 22 {ECO:0000256|SAM:SignalP}.
A2IBA6	LIPH	GO:0052689; GO:0005576	Evidence at protein level	SUBCELLULAR LOCATION: Secreted {ECO:0000256|SAAS:SAAS00553472}.			SIGNAL 1 18 {ECO:0000256|SAM:SignalP}.
A6NFB4	CSH1	GO:0005576	Evidence at protein level	SUBCELLULAR LOCATION: Secreted {ECO:0000256|RuleBase:RU003618, ECO:0000256|SAAS:SAAS00585560}.			SIGNAL 1 26 {ECO:0000256|SAM:SignalP}.
A0A0G2JL54	C4B_2	GO:0006956; GO:0004866; GO:0005615; GO:0006954	Evidence at protein level	SUBCELLULAR LOCATION: Secreted {ECO:0000256|SAAS:SAAS00562025}.			SIGNAL 1 19 {ECO:0000256|SAM:SignalP}.
B4DN26	PLAT	GO:0005576; GO:0004252	Evidence at protein level	SUBCELLULAR LOCATION: Secreted {ECO:0000256|SAAS:SAAS00558208}.			SIGNAL 1 22 {ECO:0000256|SAM:SignalP}.
A0A0G2JL35	COL11A2	GO:0005581; GO:0005201; GO:0005578	Evidence at protein level	SUBCELLULAR LOCATION: Secreted, extracellular space, extracellular matrix {ECO:0000256|SAAS:SAAS00565546}.			SIGNAL 1 22 {ECO:0000256|SAM:SignalP}.
F5GXS0	C4B	GO:0006956; GO:0004866; GO:0005615; GO:0006954	Evidence at protein level	SUBCELLULAR LOCATION: Secreted {ECO:0000256|SAAS:SAAS00562025}.			SIGNAL 1 19 {ECO:0000256|SAM:SignalP}.
A0A0C4DFS1	COL11A2	GO:0005581; GO:0005201; GO:0005578	Evidence at protein level	SUBCELLULAR LOCATION: Secreted, extracellular space, extracellular matrix {ECO:0000256|SAAS:SAAS00565546}.			SIGNAL 1 22 {ECO:0000256|SAM:SignalP}.
A6XMH3	PRL	GO:0005576	Evidence at protein level	SUBCELLULAR LOCATION: Secreted {ECO:0000256|RuleBase:RU003618, ECO:0000256|SAAS:SAAS00585560}.			SIGNAL 1 23 {ECO:0000256|SAM:SignalP}.
E9PEV4	APOE	GO:0005576; GO:0008289; GO:0006869; GO:0042157	Evidence at protein level	SUBCELLULAR LOCATION: Secreted {ECO:0000256|SAAS:SAAS00143437}.			SIGNAL 1 18 {ECO:0000256|SAM:SignalP}.
E7ENL6	COL6A3	GO:0005615; GO:0004867	Evidence at protein level	SUBCELLULAR LOCATION: Secreted, extracellular space {ECO:0000256|SAAS:SAAS00566016}.			SIGNAL 1 25 {ECO:0000256|SAM:SignalP}.
A0A0C4DFX3	NA	GO:0005581; GO:0030023; GO:0030198; GO:0010811; GO:0005578	Evidence at protein level	SUBCELLULAR LOCATION: Secreted {ECO:0000256|SAAS:SAAS00562217}.			SIGNAL 1 23 {ECO:0000256|SAM:SignalP}.
A0A087WX88	PNLIPRP2	GO:0005576; GO:0016042; GO:0004806	Evidence at protein level	SUBCELLULAR LOCATION: Secreted {ECO:0000256|RuleBase:RU362046, ECO:0000256|SAAS:SAAS00553472}.			SIGNAL 1 17 {ECO:0000256|RuleBase:RU362046}.
B1AL00	BMP7	GO:0005576; GO:0040007	Evidence at protein level	SUBCELLULAR LOCATION: Secreted {ECO:0000256|SAAS:SAAS00536846}.			SIGNAL 1 29 {ECO:0000256|SAM:SignalP}.
E7END6	PROC	GO:0005509; GO:0005576; GO:0004252	Evidence at protein level	SUBCELLULAR LOCATION: Secreted {ECO:0000256|SAAS:SAAS00558208}.			SIGNAL 1 18 {ECO:0000256|SAM:SignalP}.
A0A087WT59	TTR	GO:0005576; GO:0042572; GO:0070324; GO:0070327	Evidence at protein level	SUBCELLULAR LOCATION: Secreted {ECO:0000256|RuleBase:RU361269}.			SIGNAL 1 20 {ECO:0000256|RuleBase:RU361269}.
E9PMA6	PNLIPRP1	GO:0005576; GO:0006629; GO:0004806	Evidence at protein level	SUBCELLULAR LOCATION: Secreted {ECO:0000256|SAAS:SAAS00553472}.			SIGNAL 1 17 {ECO:0000256|SAM:SignalP}.
X6R3P0	SLIT2	GO:0005509; GO:0005576	Evidence at protein level	SUBCELLULAR LOCATION: Secreted {ECO:0000256|SAAS:SAAS00567783}.			SIGNAL 1 18 {ECO:0000256|SAM:SignalP}.
D6RAR4	HGFAC	GO:0005615; GO:0005791; GO:0004252	Evidence at protein level	SUBCELLULAR LOCATION: Secreted {ECO:0000256|SAAS:SAAS00558208}.			SIGNAL 1 35 {ECO:0000256|SAM:SignalP}.
E5RHN7	LPL	GO:0005576; GO:0006629; GO:0004465	Evidence at protein level	SUBCELLULAR LOCATION: Secreted {ECO:0000256|SAAS:SAAS00553472}.			SIGNAL 1 20 {ECO:0000256|SAM:SignalP}.
F5H034	WNT5B	GO:0016055; GO:0007275; GO:0005578	Evidence at protein level	SUBCELLULAR LOCATION: Secreted, extracellular space, extracellular matrix {ECO:0000256|RuleBase:RU003500}.			SIGNAL 1 17 {ECO:0000256|SAM:SignalP}.
C9J3H3	WNT10B	GO:0016055; GO:0007275; GO:0005578	Evidence at protein level	SUBCELLULAR LOCATION: Secreted, extracellular space, extracellular matrix {ECO:0000256|RuleBase:RU003500}.			SIGNAL 1 28 {ECO:0000256|SAM:SignalP}.
Q5H9B5	TIMP1	GO:0005576; GO:0008191	Evidence at protein level	SUBCELLULAR LOCATION: Secreted {ECO:0000256|SAAS:SAAS00562025}.			SIGNAL 1 23 {ECO:0000256|SAM:SignalP}.
F5H3Q5	COL4A6	GO:0005581; GO:0005201; GO:0005578	Evidence at protein level	SUBCELLULAR LOCATION: Secreted, extracellular space, extracellular matrix {ECO:0000256|SAAS:SAAS00565546}.			SIGNAL 1 21 {ECO:0000256|SAM:SignalP}.
X6R8F3	LCN2	GO:0005576; GO:0036094; GO:0005215	Evidence at protein level	SUBCELLULAR LOCATION: Secreted {ECO:0000256|SAAS:SAAS00557686}.			SIGNAL 1 20 {ECO:0000256|SAM:SignalP}.
A0A087X1L7	NA	GO:0016049; GO:0005576	Evidence at protein level	SUBCELLULAR LOCATION: Secreted {ECO:0000256|SAAS:SAAS00536846}.			SIGNAL 1 21 {ECO:0000256|SAM:SignalP}.
C9JF17	APOD	GO:0005576; GO:0008289; GO:0036094; GO:0005215	Evidence at protein level	SUBCELLULAR LOCATION: Secreted {ECO:0000256|SAAS:SAAS00578457}.			SIGNAL 1 48 {ECO:0000256|SAM:SignalP}.
A0A087WTA8	COL1A2	GO:0005581; GO:0005201; GO:0005578	Evidence at protein level	SUBCELLULAR LOCATION: Secreted, extracellular space, extracellular matrix {ECO:0000256|SAAS:SAAS00565546}.			SIGNAL 1 20 {ECO:0000256|SAM:SignalP}.
C9JUI2	WNT2	GO:0016055; GO:0007275; GO:0005578	Evidence at protein level	SUBCELLULAR LOCATION: Secreted, extracellular space, extracellular matrix {ECO:0000256|RuleBase:RU003500}.			SIGNAL 1 25 {ECO:0000256|SAM:SignalP}.
E7EUJ1	LIPC	GO:0005576; GO:0006629; GO:0004806	Evidence at protein level	SUBCELLULAR LOCATION: Secreted {ECO:0000256|SAAS:SAAS00553472}.			SIGNAL 1 22 {ECO:0000256|SAM:SignalP}.
E9PAL5	COL6A5	GO:0005615; GO:0005578	Evidence at protein level	SUBCELLULAR LOCATION: Secreted, extracellular space, extracellular matrix {ECO:0000256|SAAS:SAAS00565546}.			SIGNAL 1 18 {ECO:0000256|SAM:SignalP}.
E7EX42	PNLIPRP1	GO:0005576; GO:0016042; GO:0004806	Evidence at protein level	SUBCELLULAR LOCATION: Secreted {ECO:0000256|RuleBase:RU362046, ECO:0000256|SAAS:SAAS00553472}.			SIGNAL 1 17 {ECO:0000256|RuleBase:RU362046}.
E9PRT6	PNLIPRP1	GO:0005576; GO:0016042; GO:0004806	Evidence at protein level	SUBCELLULAR LOCATION: Secreted {ECO:0000256|RuleBase:RU362046, ECO:0000256|SAAS:SAAS00553472}.			SIGNAL 1 17 {ECO:0000256|RuleBase:RU362046}.
A0A087X2I3	NA	GO:0051607; GO:0005615	Evidence at protein level	SUBCELLULAR LOCATION: Secreted {ECO:0000256|SAAS:SAAS00135286}.			SIGNAL 1 23 {ECO:0000256|SAM:SignalP}.
A0A0G2JNJ8	MUC6	GO:0005576; GO:0030277	Evidence at protein level	SUBCELLULAR LOCATION: Secreted {ECO:0000256|SAAS:SAAS00567783}.			SIGNAL 1 20 {ECO:0000256|SAM:SignalP}.
A0A0A0MTG5	IL7	GO:0045453; GO:0005615; GO:0006955; GO:0030890; GO:0045582	Evidence at protein level	SUBCELLULAR LOCATION: Secreted {ECO:0000256|PIRNR:PIRNR001942}.			SIGNAL 1 25 {ECO:0000256|SAM:SignalP}.
F5H8B0	F7	GO:0007596; GO:0005509; GO:0005576; GO:0004252	Evidence at protein level	SUBCELLULAR LOCATION: Secreted {ECO:0000256|SAAS:SAAS00558208}.			SIGNAL 1 20 {ECO:0000256|SAM:SignalP}.
D6R934	C1QB	GO:0005581; GO:0005576	Evidence at protein level	SUBCELLULAR LOCATION: Secreted {ECO:0000256|SAAS:SAAS00562217}.			SIGNAL 1 25 {ECO:0000256|SAM:SignalP}.
A0A087WYZ4	CGA	GO:0005623; GO:0032870; GO:0048589; GO:0005576; GO:0046884; GO:0008406; GO:0032275; GO:0046621; GO:0030878; GO:0006590	Evidence at protein level	SUBCELLULAR LOCATION: Secreted {ECO:0000256|RuleBase:RU362129, ECO:0000256|SAAS:SAAS00521609}.			SIGNAL 1 24 {ECO:0000256|RuleBase:RU362129}.
B7ZBK1	F10	GO:0005509; GO:0005576; GO:0004252	Evidence at protein level	SUBCELLULAR LOCATION: Secreted {ECO:0000256|SAAS:SAAS00601650}.			SIGNAL 1 23 {ECO:0000256|SAM:SignalP}.
C9JZZ0	APOA5	GO:0005576; GO:0008289; GO:0006869; GO:0042157	Evidence at protein level	SUBCELLULAR LOCATION: Secreted {ECO:0000256|SAAS:SAAS00143437}.			SIGNAL 1 23 {ECO:0000256|SAM:SignalP}.
B1AKZ9	BMP7	GO:0005576; GO:0040007	Evidence at protein level	SUBCELLULAR LOCATION: Secreted {ECO:0000256|SAAS:SAAS00536846}.			SIGNAL 1 29 {ECO:0000256|SAM:SignalP}.
E5RJI0	LPL	GO:0005576; GO:0006629; GO:0004465	Evidence at protein level	SUBCELLULAR LOCATION: Secreted {ECO:0000256|SAAS:SAAS00553472}.			SIGNAL 1 20 {ECO:0000256|SAM:SignalP}.
A0A087WXW9	NA	GO:0005581; GO:0005201; GO:0005578	Evidence at protein level	SUBCELLULAR LOCATION: Secreted, extracellular space, extracellular matrix {ECO:0000256|SAAS:SAAS00565546}.			SIGNAL 1 36 {ECO:0000256|SAM:SignalP}.
E5RFR1	PENK	GO:0005576; GO:0007218	Evidence at protein level	SUBCELLULAR LOCATION: Secreted {ECO:0000256|RuleBase:RU004400}.			SIGNAL 1 20 {ECO:0000256|SAM:SignalP}.
A0A0A0MSV6	C1QB	GO:0005581; GO:0005576	Evidence at protein level	SUBCELLULAR LOCATION: Secreted {ECO:0000256|SAAS:SAAS00588336}.			SIGNAL 1 25 {ECO:0000256|SAM:SignalP}.
Q5H9B4	TIMP1	GO:0005576; GO:0008191	Evidence at protein level	SUBCELLULAR LOCATION: Secreted {ECO:0000256|SAAS:SAAS00562025}.			SIGNAL 1 35 {ECO:0000256|SAM:SignalP}.
D6RGG3	COL12A1	GO:0005615	Evidence at protein level	SUBCELLULAR LOCATION: Secreted, extracellular space {ECO:0000256|SAAS:SAAS00566016}.			SIGNAL 1 23 {ECO:0000256|SAM:SignalP}.
E7ERP7	APOE	GO:0005576; GO:0008289; GO:0006869; GO:0042157	Evidence at protein level	SUBCELLULAR LOCATION: Secreted {ECO:0000256|SAAS:SAAS00143437}.			SIGNAL 1 18 {ECO:0000256|SAM:SignalP}.
F5GYM2	WNT5B	GO:0016055; GO:0007275; GO:0005578	Evidence at protein level	SUBCELLULAR LOCATION: Secreted, extracellular space, extracellular matrix {ECO:0000256|RuleBase:RU003500}.			SIGNAL 1 17 {ECO:0000256|SAM:SignalP}.
A0A087WX75	NA	GO:0005576	Evidence at protein level	SUBCELLULAR LOCATION: Secreted {ECO:0000256|RuleBase:RU003618, ECO:0000256|SAAS:SAAS00585560}.			SIGNAL 1 26 {ECO:0000256|SAM:SignalP}.
E9PMX6	PNLIPRP1	GO:0005576; GO:0006629; GO:0004806	Evidence at protein level	SUBCELLULAR LOCATION: Secreted {ECO:0000256|SAAS:SAAS00553472}.			SIGNAL 1 17 {ECO:0000256|SAM:SignalP}.
A0A0C4DGV7	NA	GO:0005576; GO:0005501; GO:0036094; GO:0005215	Evidence at protein level	SUBCELLULAR LOCATION: Secreted {ECO:0000256|SAAS:SAAS00557686}.			SIGNAL 1 16 {ECO:0000256|SAM:SignalP}.
A0A0G2JN42	MUC6	GO:0005576; GO:0030277	Evidence at protein level	SUBCELLULAR LOCATION: Secreted {ECO:0000256|SAAS:SAAS00567783}.			SIGNAL 1 20 {ECO:0000256|SAM:SignalP}.
Q5JVE8	F10	GO:0005509; GO:0005576; GO:0004252	Evidence at protein level	SUBCELLULAR LOCATION: Secreted {ECO:0000256|SAAS:SAAS00601650}.			SIGNAL 1 23 {ECO:0000256|SAM:SignalP}.
X6RLJ0	C1QA	GO:0005581; GO:0005576	Evidence at protein level	SUBCELLULAR LOCATION: Secreted {ECO:0000256|SAAS:SAAS00588336}.			SIGNAL 1 22 {ECO:0000256|SAM:SignalP}.
A0A087WV45	TTR	GO:0005576; GO:0042572; GO:0070324; GO:0070327	Evidence at protein level	SUBCELLULAR LOCATION: Secreted {ECO:0000256|RuleBase:RU361269}.			SIGNAL 1 20 {ECO:0000256|RuleBase:RU361269}.
B5MCC8	WNT10B	GO:0016055; GO:0007275; GO:0005578	Evidence at protein level	SUBCELLULAR LOCATION: Secreted, extracellular space, extracellular matrix {ECO:0000256|RuleBase:RU003500, ECO:0000256|SAAS:SAAS00569942}.			SIGNAL 1 28 {ECO:0000256|SAM:SignalP}.
E9PJC9	PNLIPRP1	GO:0005576; GO:0006629; GO:0004806	Evidence at protein level	SUBCELLULAR LOCATION: Secreted {ECO:0000256|SAAS:SAAS00553472}.			SIGNAL 1 17 {ECO:0000256|SAM:SignalP}.
C9JCI2	WNT10B	GO:0016055; GO:0007275; GO:0005578	Evidence at protein level	SUBCELLULAR LOCATION: Secreted, extracellular space, extracellular matrix {ECO:0000256|RuleBase:RU003500}.			SIGNAL 1 28 {ECO:0000256|SAM:SignalP}.
E7EUK6	LIPC	GO:0005576; GO:0006629; GO:0004806	Evidence at protein level	SUBCELLULAR LOCATION: Secreted {ECO:0000256|SAAS:SAAS00553472}.			SIGNAL 1 22 {ECO:0000256|SAM:SignalP}.
Q9NP10	IGF1	GO:0005615; GO:0010560; GO:0050714; GO:0050821; GO:0030166	Evidence at protein level	SUBCELLULAR LOCATION: Secreted {ECO:0000256|RuleBase:RU000406, ECO:0000256|SAAS:SAAS00037338}.			SIGNAL 1 25 {ECO:0000256|SAM:SignalP}.
F5H364	WNT5B	GO:0016055; GO:0007275; GO:0005578	Evidence at protein level	SUBCELLULAR LOCATION: Secreted, extracellular space, extracellular matrix {ECO:0000256|RuleBase:RU003500, ECO:0000256|SAAS:SAAS00569942}.			SIGNAL 1 17 {ECO:0000256|SAM:SignalP}.
A0A087X094	NPPA	GO:0005576; GO:0050880	Evidence at protein level	SUBCELLULAR LOCATION: Secreted {ECO:0000256|RuleBase:RU003686, ECO:0000256|SAAS:SAAS00591933}.			SIGNAL 1 25 {ECO:0000256|SAM:SignalP}.
C9J8I8	WNT5A	GO:0016055; GO:0007275; GO:0005578	Evidence at protein level	SUBCELLULAR LOCATION: Secreted, extracellular space, extracellular matrix {ECO:0000256|RuleBase:RU003500, ECO:0000256|SAAS:SAAS00569942}.			SIGNAL 1 27 {ECO:0000256|SAM:SignalP}.
E9PR20	PNLIPRP1	GO:0005576; GO:0006629; GO:0004806	Evidence at protein level	SUBCELLULAR LOCATION: Secreted {ECO:0000256|SAAS:SAAS00553472}.			SIGNAL 1 17 {ECO:0000256|SAM:SignalP}.
A0A075B781	NA	GO:0005576; GO:0016042; GO:0004806	Evidence at protein level	SUBCELLULAR LOCATION: Secreted {ECO:0000256|RuleBase:RU362046, ECO:0000256|SAAS:SAAS00553472}.			SIGNAL 1 17 {ECO:0000256|RuleBase:RU362046}.
H7C4H1	PLA1A	GO:0052689; GO:0005576	Evidence at protein level	SUBCELLULAR LOCATION: Secreted {ECO:0000256|SAAS:SAAS00553472}.			SIGNAL 1 20 {ECO:0000256|SAM:SignalP}.
A0A087WXJ5	GH2	GO:0005576	Evidence at protein level	SUBCELLULAR LOCATION: Secreted {ECO:0000256|RuleBase:RU003618, ECO:0000256|SAAS:SAAS00585560}.			SIGNAL 1 26 {ECO:0000256|SAM:SignalP}.
A0A087WVM3	NA	GO:0005576; GO:0001558	Evidence at protein level	SUBCELLULAR LOCATION: Secreted {ECO:0000256|SAAS:SAAS00567783}.			SIGNAL 1 24 {ECO:0000256|SAM:SignalP}.
H0YM39	CSH2	GO:0005576	Evidence at protein level	SUBCELLULAR LOCATION: Secreted {ECO:0000256|RuleBase:RU003618, ECO:0000256|SAAS:SAAS00585560}.			SIGNAL 1 24 {ECO:0000256|SAM:SignalP}.
F5H7Q6	WNT5B	GO:0016055; GO:0007275; GO:0005578	Evidence at protein level	SUBCELLULAR LOCATION: Secreted, extracellular space, extracellular matrix {ECO:0000256|RuleBase:RU003500, ECO:0000256|SAAS:SAAS00569942}.			SIGNAL 1 17 {ECO:0000256|SAM:SignalP}.
F8WDR1	WNT2	GO:0016055; GO:0007275; GO:0005578	Evidence at protein level	SUBCELLULAR LOCATION: Secreted, extracellular space, extracellular matrix {ECO:0000256|RuleBase:RU003500}.			SIGNAL 1 25 {ECO:0000256|SAM:SignalP}.
E7ESF4	PLAT	GO:0005576; GO:0004252	Evidence at protein level	SUBCELLULAR LOCATION: Secreted {ECO:0000256|SAAS:SAAS00558208}.			SIGNAL 1 22 {ECO:0000256|SAM:SignalP}.
F5H851	COL4A6	GO:0005581; GO:0005201; GO:0005578	Evidence at protein level	SUBCELLULAR LOCATION: Secreted, extracellular space, extracellular matrix {ECO:0000256|SAAS:SAAS00565546}.			SIGNAL 1 21 {ECO:0000256|SAM:SignalP}.
H0Y7L5	APOE	GO:0005576; GO:0008289; GO:0006869; GO:0042157	Evidence at protein level	SUBCELLULAR LOCATION: Secreted {ECO:0000256|SAAS:SAAS00143437}.			SIGNAL 1 44 {ECO:0000256|SAM:SignalP}.
A0A087WZY5	COL4A6	GO:0005581; GO:0005201; GO:0005578	Evidence at protein level	SUBCELLULAR LOCATION: Secreted, extracellular space, extracellular matrix {ECO:0000256|SAAS:SAAS00565546}.			SIGNAL 1 21 {ECO:0000256|SAM:SignalP}.
Q5VZ75	CCL19	GO:0060326; GO:0005615; GO:0006955	Evidence at protein level	SUBCELLULAR LOCATION: Secreted {ECO:0000256|RuleBase:RU361150}.			SIGNAL 1 21 {ECO:0000256|RuleBase:RU361150}.
B1AHL2	FBLN1	GO:0005509; GO:0030198; GO:0016504; GO:0005578	Evidence at protein level	SUBCELLULAR LOCATION: Secreted, extracellular space, extracellular matrix {ECO:0000256|PIRNR:PIRNR036313}.			SIGNAL 1 29 {ECO:0000256|SAM:SignalP}.
S4R3Y4	AMBP	GO:0005576; GO:0036094	Evidence at protein level	SUBCELLULAR LOCATION: Secreted {ECO:0000256|SAAS:SAAS00557686}.			SIGNAL 1 19 {ECO:0000256|SAM:SignalP}.
A0A087WWS6	IFNA13	GO:0051607; GO:0005615	Evidence at protein level	SUBCELLULAR LOCATION: Secreted {ECO:0000256|SAAS:SAAS00135286}.			SIGNAL 1 24 {ECO:0000256|SAM:SignalP}.
E7EVP0	PNOC	GO:0005576; GO:0007218; GO:0007268	Evidence at protein level	SUBCELLULAR LOCATION: Secreted {ECO:0000256|RuleBase:RU004400}.			SIGNAL 1 19 {ECO:0000256|SAM:SignalP}.
C9J4T6	CXCL8	GO:0005615; GO:0006955; GO:0042119; GO:0030593	Evidence at protein level	SUBCELLULAR LOCATION: Secreted {ECO:0000256|RuleBase:RU361149, ECO:0000256|SAAS:SAAS00156280}.			SIGNAL 1 22 {ECO:0000256|RuleBase:RU361149}.
A0A0R4J2F0	CGA	GO:0005576	Evidence at protein level	SUBCELLULAR LOCATION: Secreted {ECO:0000256|RuleBase:RU362129, ECO:0000256|SAAS:SAAS00521609}.			SIGNAL 1 22 {ECO:0000256|RuleBase:RU362129}.
X6R4H8	ADAMTSL5	GO:0004222; GO:0005578; GO:0008270	Evidence at protein level	SUBCELLULAR LOCATION: Secreted {ECO:0000256|SAAS:SAAS00562025}.			SIGNAL 1 32 {ECO:0000256|SAM:SignalP}.
D6RF92	CXCL6	GO:0060326; GO:0005615; GO:0006955	Evidence at protein level	SUBCELLULAR LOCATION: Secreted {ECO:0000256|RuleBase:RU361149, ECO:0000256|SAAS:SAAS00156280}.			SIGNAL 1 36 {ECO:0000256|RuleBase:RU361149}.
