# Supplementary material for: Comprehensive Identification and Characterization of Human Secretome Based on Integrative Proteomic and Transcriptomic Data
Source: Front Cell Dev Biol. 2019 Nov 21;7:299. doi: 10.3389/fcell.2019.00299 (PMC6881247; doi:10.3389/fcell.2019.00299)
Supplement: Supplementary file 2 [file Table_2.xlsx]

## Sheet: Supplementary Table 2
Supplementary Table 2: GSNPs from UniProt database
Entry	Gene name	Protein existence	Gene ontology IDs	Signal peptide	Subcellular location [CC]	Transmembrane	Intramembrane
A0A023T787	RBM8	Evidence at transcript level	GO:0003723; GO:0008380; GO:0005737; GO:0030425; GO:0006397; GO:0051028; GO:0043025; GO:0016607; GO:0005654; GO:0000166		SUBCELLULAR LOCATION: Nucleus {ECO:0000256|RuleBase:RU361239}. Nucleus speckle {ECO:0000256|RuleBase:RU361239}. Cytoplasm {ECO:0000256|RuleBase:RU361239}.
A0A024QYU9	EIF3S8	Inferred from homology	GO:0016282; GO:0033290; GO:0005852; GO:0001731; GO:0006446; GO:0003743		SUBCELLULAR LOCATION: Cytoplasm {ECO:0000256|HAMAP-Rule:MF_03002, ECO:0000256|SAAS:SAAS00535949}.
A0A024QYX5	FTSJ1	Evidence at transcript level	GO:0005737; GO:0002181; GO:0008175; GO:0002128		SUBCELLULAR LOCATION: Cytoplasm {ECO:0000256|HAMAP-Rule:MF_03162}.
A0A024QYX7	EIF3S8	Inferred from homology	GO:0016282; GO:0033290; GO:0005852; GO:0001731; GO:0006446; GO:0003743		SUBCELLULAR LOCATION: Cytoplasm {ECO:0000256|HAMAP-Rule:MF_03002, ECO:0000256|SAAS:SAAS00535949}.
A0A024QYZ8	hCG_1985585	Predicted	GO:0005634; GO:0006355; GO:0006351		SUBCELLULAR LOCATION: Nucleus {ECO:0000256|SAAS:SAAS00600858}.
A0A024QZ45	NA	Predicted	GO:0005524; GO:0004003; GO:0003677; GO:0071295; GO:0005737; GO:0008285; GO:0031965; GO:0006139; GO:0005634		SUBCELLULAR LOCATION: Nucleus {ECO:0000256|SAAS:SAAS00553264}.
A0A024QZ86	TBX2	Predicted	GO:0003677; GO:0007219; GO:0035909; GO:0036302; GO:0048738; GO:0007569; GO:0060560; GO:0048596; GO:0042733; GO:0003203; GO:0060596; GO:0007521; GO:1901211; GO:1901208; GO:0000122; GO:0005634; GO:0003148; GO:0060021; GO:0060465; GO:0060045; GO:0003256; GO:0003700; GO:0005667; GO:0006351		SUBCELLULAR LOCATION: Nucleus {ECO:0000256|SAAS:SAAS00353240}.
A0A024QZB1	hCG_1998636	Predicted	GO:0008168; GO:0003676; GO:0000166; GO:0005634		SUBCELLULAR LOCATION: Nucleus {ECO:0000256|SAAS:SAAS00574581}.
A0A024QZD8	TEAD2	Predicted	GO:0003677; GO:0035329; GO:0005634; GO:0003700; GO:0006351		SUBCELLULAR LOCATION: Nucleus {ECO:0000256|PIRNR:PIRNR002603}.
A0A024QZE2	TEAD2	Predicted	GO:0003677; GO:0035329; GO:0005634; GO:0003700; GO:0006351		SUBCELLULAR LOCATION: Nucleus {ECO:0000256|PIRNR:PIRNR002603}.
A0A024QZP6	H2AFY2	Predicted	GO:0031490; GO:0016568; GO:0000790; GO:0005654; GO:0000786; GO:0006334		SUBCELLULAR LOCATION: Nucleus {ECO:0000256|PIRNR:PIRNR037942}. Chromosome {ECO:0000256|PIRNR:PIRNR037942}.
A0A024QZR3	hCG_2002731	Inferred from homology	GO:0071025; GO:0005737; GO:0004519; GO:0046872; GO:0070966; GO:0070481; GO:0005634		SUBCELLULAR LOCATION: Nucleus {ECO:0000256|RuleBase:RU362019}. Cytoplasm {ECO:0000256|RuleBase:RU362019}.
A0A024QZS1	MOCS2	Inferred from homology	GO:0006777; GO:0005737; GO:0005829; GO:0030366; GO:0019008; GO:0005634		SUBCELLULAR LOCATION: Cytoplasm, cytosol {ECO:0000256|HAMAP-Rule:MF_03052}.
A0A024QZZ7	HIST1H2BD	Inferred from homology	GO:0003677; GO:0005737; GO:0005654; GO:0000786		SUBCELLULAR LOCATION: Chromosome {ECO:0000256|SAAS:SAAS00565666}.; SUBCELLULAR LOCATION: Nucleus {ECO:0000256|RuleBase:RU000451, ECO:0000256|SAAS:SAAS00566189}.
A0A024R012	SIRT5	Inferred from homology	GO:0070403; GO:0034979; GO:0005829; GO:0005743; GO:0005739; GO:0010667; GO:0005634; GO:0061697; GO:0036054; GO:0036055; GO:0010566; GO:0031667; GO:0008270		SUBCELLULAR LOCATION: Mitochondrion {ECO:0000256|HAMAP-Rule:MF_03160}. Cytoplasm, cytosol {ECO:0000256|HAMAP-Rule:MF_03160}. Nucleus {ECO:0000256|HAMAP-Rule:MF_03160}. Note=Mainly mitochondrial. Also present extramitochondrially: a fraction is present in the cytosol and very small amounts are also detected in the nucleus. {ECO:0000256|HAMAP-Rule:MF_03160}.
A0A024R017	HIST1H2AC	Inferred from homology	GO:0003677; GO:0000786; GO:0005634		SUBCELLULAR LOCATION: Chromosome {ECO:0000256|SAAS:SAAS00534031}.; SUBCELLULAR LOCATION: Nucleus {ECO:0000256|RuleBase:RU000527, ECO:0000256|SAAS:SAAS00534029}.
A0A024R087	hCG_36935	Predicted	GO:0000981; GO:0046872; GO:0003676; GO:0005634; GO:0006351		SUBCELLULAR LOCATION: Nucleus {ECO:0000256|SAAS:SAAS00535819}.
A0A024R0L3	POU2F2	Inferred from homology	GO:0005634; GO:0043565; GO:0003700; GO:0006351		SUBCELLULAR LOCATION: Nucleus {ECO:0000256|RuleBase:RU361194, ECO:0000256|SAAS:SAAS00553137}.
A0A024R0L4	ERF	Inferred from homology	GO:0005794; GO:0000122; GO:0005634; GO:0043565; GO:0003714; GO:0003700		SUBCELLULAR LOCATION: Nucleus {ECO:0000256|SAAS:SAAS00594387}.
A0A024R0S2	MEIS3	Predicted	GO:0003677; GO:0005634; GO:0006355		SUBCELLULAR LOCATION: Nucleus {ECO:0000256|SAAS:SAAS00563020}.
A0A024R0W2	MEIS3	Predicted	GO:0003677; GO:0005634; GO:0006355		SUBCELLULAR LOCATION: Nucleus {ECO:0000256|SAAS:SAAS00563020}.
A0A024R0Y4	TADA2A	Evidence at protein level	GO:0005671; GO:0003677; GO:0016573; GO:0007067; GO:0072686; GO:0031063; GO:0001932; GO:0031647; GO:0006357; GO:0090043		SUBCELLULAR LOCATION: Nucleus {ECO:0000256|SAAS:SAAS00548613}.
A0A024R0Y5	PFKM	Evidence at transcript level	GO:0003872; GO:0005524; GO:0005737; GO:0006002; GO:0046872		SUBCELLULAR LOCATION: Cytoplasm {ECO:0000256|HAMAP-Rule:MF_03184}.
A0A024R126	NR4A1	Inferred from homology	GO:0004879; GO:0005737; GO:0031965; GO:0005634; GO:0043565; GO:0003707; GO:0006351; GO:0008270		SUBCELLULAR LOCATION: Nucleus {ECO:0000256|SAAS:SAAS00595767}.
A0A024R158	SMC2L1	Inferred from homology	GO:0005524; GO:0000796; GO:0051383; GO:0010032; GO:0045132; GO:0007076; GO:0005730; GO:0005634		SUBCELLULAR LOCATION: Nucleus {ECO:0000256|PIRNR:PIRNR005719}.
A0A024R168	NR4A3	Inferred from homology	GO:0004879; GO:0005634; GO:0043565; GO:0003707; GO:0006351; GO:0008270		SUBCELLULAR LOCATION: Nucleus {ECO:0000256|SAAS:SAAS00595767}.
A0A024R1A7	ELK1	Inferred from homology	GO:0043679; GO:0071480; GO:0071394; GO:0003682; GO:0001047; GO:0030425; GO:0003690; GO:0005739; GO:0043025; GO:0005654; GO:1901216; GO:0045944; GO:0071774; GO:0009416; GO:0043565; GO:0003700		SUBCELLULAR LOCATION: Nucleus {ECO:0000256|SAAS:SAAS00594387}.
A0A024R1M4	CBX7	Predicted	GO:0005737; GO:0005654		SUBCELLULAR LOCATION: Nucleus {ECO:0000256|SAAS:SAAS00539527}.
A0A024R1Q2	CBX7	Predicted	GO:0035102; GO:0003682; GO:0005737; GO:0000792; GO:0005654; GO:0042493; GO:0048733; GO:0003727		SUBCELLULAR LOCATION: Nucleus {ECO:0000256|SAAS:SAAS00539527}.
A0A024R1T9	ACLY	Inferred from homology	GO:0005524; GO:0003878; GO:0006085; GO:0006101; GO:0048037; GO:0005737; GO:0006633; GO:0016829; GO:0046872; GO:0005654; GO:0005886		SUBCELLULAR LOCATION: Cytoplasm {ECO:0000256|PIRNR:PIRNR036511}.
A0A024R1U5	PMM1	Inferred from homology	GO:0009298; GO:0005737; GO:0043025; GO:0004615		SUBCELLULAR LOCATION: Cytoplasm {ECO:0000256|RuleBase:RU361118}.
A0A024R1V8	BRCA1	Predicted	GO:0031436; GO:0003677; GO:0006310; GO:0006281; GO:0007049; GO:0005694; GO:0016874; GO:0085020; GO:0051865; GO:0004842; GO:0008270		SUBCELLULAR LOCATION: Nucleus {ECO:0000256|PIRNR:PIRNR001734}. Chromosome {ECO:0000256|PIRNR:PIRNR001734}. Note=Localizes at sites of DNA damage at double-strand breaks (DSBs); recruitment to DNA damage sites is mediated by the BRCA1-A complex. {ECO:0000256|PIRNR:PIRNR001734}.
A0A024R1W0	BRCA1	Predicted	GO:0031436; GO:0003677; GO:0006310; GO:0006281; GO:0007049; GO:0005694; GO:0016874; GO:0085020; GO:0051865; GO:0004842; GO:0008270		SUBCELLULAR LOCATION: Nucleus {ECO:0000256|PIRNR:PIRNR001734}. Chromosome {ECO:0000256|PIRNR:PIRNR001734}. Note=Localizes at sites of DNA damage at double-strand breaks (DSBs); recruitment to DNA damage sites is mediated by the BRCA1-A complex. {ECO:0000256|PIRNR:PIRNR001734}.
A0A024R1Y0	BRCA1	Predicted	GO:0031436; GO:0003677; GO:0006310; GO:0006281; GO:0007049; GO:0005694; GO:0016874; GO:0085020; GO:0051865; GO:0004842; GO:0008270		SUBCELLULAR LOCATION: Nucleus {ECO:0000256|PIRNR:PIRNR001734}. Chromosome {ECO:0000256|PIRNR:PIRNR001734}. Note=Localizes at sites of DNA damage at double-strand breaks (DSBs); recruitment to DNA damage sites is mediated by the BRCA1-A complex. {ECO:0000256|PIRNR:PIRNR001734}.
A0A024R1Y1	BRCA1	Predicted	GO:0031436; GO:0003677; GO:0006310; GO:0006281; GO:0007049; GO:0005694; GO:0016874; GO:0085020; GO:0051865; GO:0004842; GO:0008270		SUBCELLULAR LOCATION: Nucleus {ECO:0000256|PIRNR:PIRNR001734}. Chromosome {ECO:0000256|PIRNR:PIRNR001734}. Note=Localizes at sites of DNA damage at double-strand breaks (DSBs); recruitment to DNA damage sites is mediated by the BRCA1-A complex. {ECO:0000256|PIRNR:PIRNR001734}.
A0A024R1Y2	ACLY	Inferred from homology	GO:0005524; GO:0003878; GO:0006085; GO:0006101; GO:0048037; GO:0005737; GO:0006629; GO:0016829; GO:0046872; GO:0005654; GO:0005886		SUBCELLULAR LOCATION: Cytoplasm {ECO:0000256|PIRNR:PIRNR036511}.
A0A024R241	NFIL3	Inferred from homology	GO:0000979; GO:0071353; GO:0007623; GO:0006955; GO:0005634; GO:0010628; GO:0003700; GO:0006366		SUBCELLULAR LOCATION: Nucleus {ECO:0000256|PIRNR:PIRNR019029}.
A0A024R274	SMAD4	Evidence at transcript level	GO:0030509; GO:0000977; GO:0090575; GO:0036302; GO:0003190; GO:0007411; GO:0003360; GO:0001658; GO:0003279; GO:0008283; GO:0006879; GO:0003682; GO:0005737; GO:0048589; GO:0042733; GO:0060956; GO:0007492; GO:0042118; GO:0003198; GO:0061040; GO:0048859; GO:0001702; GO:0001701; GO:0070102; GO:0007498; GO:0072133; GO:0060548; GO:0008285; GO:0000122; GO:0072134; GO:0014033; GO:0048663; GO:0001541; GO:…		SUBCELLULAR LOCATION: Cytoplasm {ECO:0000256|RuleBase:RU361195}. Nucleus {ECO:0000256|RuleBase:RU361195}.; SUBCELLULAR LOCATION: Nucleus {ECO:0000256|SAAS:SAAS00573677}.
A0A024R2H1	SATB1	Inferred from homology	GO:0003677; GO:0005634; GO:0006355; GO:0006351		SUBCELLULAR LOCATION: Nucleus {ECO:0000256|RuleBase:RU361129}.
A0A024R2H2	TSEN2	Inferred from homology	GO:0005813; GO:0005737; GO:0016829; GO:0003676; GO:0005654; GO:0006388; GO:0000213; GO:0000214		SUBCELLULAR LOCATION: Nucleus {ECO:0000256|PIRNR:PIRNR011789}.
A0A024R2P0	RPSA	Inferred from homology	GO:0007155; GO:0022627; GO:0005055; GO:0005634; GO:0005886; GO:0000028; GO:0003735; GO:0006412		SUBCELLULAR LOCATION: Cell membrane {ECO:0000256|HAMAP-Rule:MF_03016}. Cytoplasm {ECO:0000256|HAMAP-Rule:MF_03016}. Nucleus {ECO:0000256|HAMAP-Rule:MF_03016}. Note=67LR is found at the surface of the plasma membrane, with its C-terminal laminin-binding domain accessible to extracellular ligands. 37LRP is found at the cell surface, in the cytoplasm and in the nucleus. Co-localizes with PPP1R16B in…
A0A024R2V0	MAP4	Predicted	GO:0005737; GO:0005874		SUBCELLULAR LOCATION: Cytoplasm, cytoskeleton {ECO:0000256|RuleBase:RU000686}.
A0A024R328	PRKCD	Inferred from homology	GO:0005524; GO:0042100; GO:0006915; GO:0007049; GO:0005911; GO:0005737; GO:0042742; GO:0016064; GO:0032613; GO:0032615; GO:0035556; GO:0016020; GO:0046872; GO:0030837; GO:0051490; GO:0046627; GO:0050732; GO:0090331; GO:0016363; GO:0048471; GO:2001235; GO:0004697		SUBCELLULAR LOCATION: Cytoplasm {ECO:0000256|PIRNR:PIRNR000551}. Cytoplasm, perinuclear region {ECO:0000256|PIRNR:PIRNR000551}. Nucleus {ECO:0000256|PIRNR:PIRNR000551}.
A0A024R364	HESX1	Predicted	GO:0003682; GO:0048853; GO:0045892; GO:0043584; GO:0005634; GO:0030916; GO:0043565		SUBCELLULAR LOCATION: Nucleus {ECO:0000256|RuleBase:RU000682}.
A0A024R385	SHOX	Inferred from homology	GO:0005634; GO:0006355; GO:0043565		SUBCELLULAR LOCATION: Nucleus {ECO:0000256|RuleBase:RU000682, ECO:0000256|SAAS:SAAS00159552}.
A0A024R3K4	FLI1	Inferred from homology	GO:0005634; GO:0043565; GO:0003700		SUBCELLULAR LOCATION: Nucleus {ECO:0000256|SAAS:SAAS00594387}.
A0A024R3M3	ZNF202	Predicted	GO:0046872; GO:0005739; GO:0003676; GO:0005654; GO:0003700; GO:0006351		SUBCELLULAR LOCATION: Nucleus {ECO:0000256|SAAS:SAAS00574784}.
A0A024R3M5	FLI1	Inferred from homology	GO:0000978; GO:0000980; GO:0008015; GO:0003682; GO:0035855; GO:0005634; GO:0009887; GO:0001077		SUBCELLULAR LOCATION: Nucleus {ECO:0000256|SAAS:SAAS00594387}.
A0A024R3N6	FLI1	Inferred from homology	GO:0005634; GO:0043565; GO:0003700		SUBCELLULAR LOCATION: Nucleus {ECO:0000256|SAAS:SAAS00594387}.
A0A024R3P0	hCG_1983452	Predicted	GO:0005634		SUBCELLULAR LOCATION: Nucleus {ECO:0000256|SAAS:SAAS00539527}.
A0A024R3T7	MIXL1	Predicted	GO:0005634; GO:0006355; GO:0043565		SUBCELLULAR LOCATION: Nucleus {ECO:0000256|RuleBase:RU000682}.
A0A024R3U6	SATB2	Inferred from homology	GO:0051216; GO:0071310; GO:0003682; GO:0006338; GO:0021902; GO:0005737; GO:0009880; GO:0048704; GO:0000118; GO:0000122; GO:0001764; GO:0005654; GO:0002076; GO:0060021; GO:0045944; GO:0043565; GO:0005667; GO:0006351		SUBCELLULAR LOCATION: Nucleus {ECO:0000256|RuleBase:RU361129}.
A0A024R3V2	EXO1	Predicted	GO:0035312; GO:0003677; GO:0006281; GO:0005634		SUBCELLULAR LOCATION: Nucleus {ECO:0000256|SAAS:SAAS00537425}.
A0A024R3V5	NIF3L1	Inferred from homology	GO:0005737; GO:0005634		SUBCELLULAR LOCATION: Cytoplasm {ECO:0000256|PIRNR:PIRNR037490}. Nucleus {ECO:0000256|PIRNR:PIRNR037490}.
A0A024R3V7	NIF3L1	Inferred from homology	GO:0005739; GO:1903507; GO:0030182; GO:0005634		SUBCELLULAR LOCATION: Cytoplasm {ECO:0000256|PIRNR:PIRNR037490}. Nucleus {ECO:0000256|PIRNR:PIRNR037490}.
A0A024R3Y8	MAP2	Predicted	GO:0021954; GO:0005737; GO:0005874; GO:0001578		SUBCELLULAR LOCATION: Cytoplasm, cytoskeleton {ECO:0000256|RuleBase:RU000686}.
A0A024R3Z1	MAP2	Predicted	GO:0021954; GO:0005737; GO:0005874; GO:0001578		SUBCELLULAR LOCATION: Cytoplasm, cytoskeleton {ECO:0000256|RuleBase:RU000686}.
A0A024R3Z2	SUMO1	Inferred from homology	GO:0016605; GO:0030578; GO:0001741; GO:0030425; GO:0001650; GO:0000792; GO:0031965; GO:0005730; GO:0005634; GO:0060021; GO:1901896; GO:0090204; GO:0016925; GO:0086004; GO:0031647; GO:0006355; GO:0045202; GO:0008134		SUBCELLULAR LOCATION: Nucleus {ECO:0000256|RuleBase:RU361190}.
A0A024R407	MAP2	Predicted	GO:0021954; GO:0005737; GO:0005874; GO:0001578; GO:0005730		SUBCELLULAR LOCATION: Cytoplasm, cytoskeleton {ECO:0000256|RuleBase:RU000686}.
A0A024R409	MAP2	Predicted	GO:0021954; GO:0005737; GO:0005874; GO:0001578; GO:0005730		SUBCELLULAR LOCATION: Cytoplasm, cytoskeleton {ECO:0000256|RuleBase:RU000686}.
A0A024R470	PAX3	Predicted	GO:0007517; GO:0014029; GO:0005654; GO:0006357; GO:0043565; GO:0003700; GO:0006351		SUBCELLULAR LOCATION: Nucleus {ECO:0000256|RuleBase:RU000491, ECO:0000256|SAAS:SAAS00117811}.
A0A024R4E9	RERE	Predicted	GO:0001105; GO:0001106; GO:0048755; GO:0021691; GO:0021930; GO:0003682; GO:0006338; GO:0048813; GO:0000118; GO:0021942; GO:0043565; GO:0003700; GO:0008270		SUBCELLULAR LOCATION: Nucleus {ECO:0000256|SAAS:SAAS00548613}.
A0A024R4I5	SPIB	Inferred from homology	GO:0005634; GO:0043565; GO:0003700		SUBCELLULAR LOCATION: Nucleus {ECO:0000256|SAAS:SAAS00594387}.
A0A024R4K8	SPIB	Inferred from homology	GO:0005634; GO:0043565; GO:0003700		SUBCELLULAR LOCATION: Nucleus {ECO:0000256|SAAS:SAAS00594387}.
A0A024R4N9	TSEN34	Evidence at protein level	GO:0016829; GO:0003676; GO:0005634; GO:0000213; GO:0000214; GO:0000379		SUBCELLULAR LOCATION: Nucleus {ECO:0000256|PIRNR:PIRNR017250}.
A0A024R4P4	ZNF444	Predicted	GO:0046872; GO:0003676; GO:0005634; GO:0003700; GO:0006351		SUBCELLULAR LOCATION: Nucleus {ECO:0000256|SAAS:SAAS00574784}.
A0A024R4R6	ZNF42	Predicted	GO:0046872; GO:0003676; GO:0005634; GO:0003700; GO:0006351		SUBCELLULAR LOCATION: Nucleus {ECO:0000256|SAAS:SAAS00574784}.
A0A024R4S5	ZNF444	Predicted	GO:0046872; GO:0003676; GO:0005634; GO:0003700; GO:0006351		SUBCELLULAR LOCATION: Nucleus {ECO:0000256|SAAS:SAAS00574784}.
A0A024R4S6	ZSCAN5	Predicted	GO:0046872; GO:0003676; GO:0005634; GO:0003700; GO:0006351		SUBCELLULAR LOCATION: Nucleus {ECO:0000256|SAAS:SAAS00574784}.
A0A024R4T0	ZNF447	Predicted	GO:0046872; GO:0003676; GO:0005634; GO:0003700; GO:0006351		SUBCELLULAR LOCATION: Nucleus {ECO:0000256|SAAS:SAAS00574784}.
A0A024R4T5	ZNF42	Predicted	GO:0046872; GO:0003676; GO:0005634; GO:0003700; GO:0006351		SUBCELLULAR LOCATION: Nucleus {ECO:0000256|SAAS:SAAS00574784}.
A0A024R4T7	ZNF446	Predicted	GO:0046872; GO:0003676; GO:0005634; GO:0003700; GO:0006351		SUBCELLULAR LOCATION: Nucleus {ECO:0000256|SAAS:SAAS00574784}.
A0A024R4X8	PAX8	Predicted	GO:0003677; GO:0007275; GO:0005654; GO:0006355; GO:0006351		SUBCELLULAR LOCATION: Nucleus {ECO:0000256|RuleBase:RU000491, ECO:0000256|SAAS:SAAS00117811}.
A0A024R524	PAX8	Predicted	GO:0003677; GO:0007275; GO:0005654; GO:0006355; GO:0006351		SUBCELLULAR LOCATION: Nucleus {ECO:0000256|RuleBase:RU000491, ECO:0000256|SAAS:SAAS00117811}.
A0A024R531	PAX8	Evidence at transcript level	GO:0003677; GO:0007275; GO:0005634; GO:0006355; GO:0006351		SUBCELLULAR LOCATION: Nucleus {ECO:0000256|RuleBase:RU000491, ECO:0000256|SAAS:SAAS00117811}.
A0A024R534	MTA2	Predicted	GO:0006306; GO:0016581; GO:0003682; GO:0004407; GO:0000122; GO:0005654; GO:0045944; GO:0010762; GO:0043565; GO:0003700; GO:0000989; GO:0044212; GO:0008270		SUBCELLULAR LOCATION: Nucleus {ECO:0000256|SAAS:SAAS00548613}.
A0A024R597	HTATIP	Inferred from homology	GO:0004402; GO:0005654; GO:0006355		SUBCELLULAR LOCATION: Nucleus {ECO:0000256|RuleBase:RU361211}.
A0A024R5A7	TAF6L	Predicted	GO:0006352; GO:0005634; GO:0051090		SUBCELLULAR LOCATION: Nucleus {ECO:0000256|SAAS:SAAS00570996}.
A0A024R5E8	HTATIP	Inferred from homology	GO:0004402; GO:0005654; GO:0006355		SUBCELLULAR LOCATION: Nucleus {ECO:0000256|RuleBase:RU361211}.
A0A024R5Q5	ZNF496	Predicted	GO:0003677; GO:0046872; GO:0000122; GO:0016604; GO:0045893; GO:0003700; GO:0006351		SUBCELLULAR LOCATION: Nucleus {ECO:0000256|SAAS:SAAS00574784}.
A0A024R5Q7	ADSS	Inferred from homology	GO:0044208; GO:0005525; GO:0046040; GO:0004019; GO:0006531; GO:0071257; GO:0005737; GO:0000287; GO:0005886; GO:0060359; GO:0014074		SUBCELLULAR LOCATION: Cytoplasm {ECO:0000256|HAMAP-Rule:MF_03127}.
A0A024R5S5	EIF3S1	Inferred from homology	GO:0016282; GO:0033290; GO:0005852; GO:0001731; GO:0006446; GO:0003743		SUBCELLULAR LOCATION: Cytoplasm {ECO:0000256|HAMAP-Rule:MF_03009}.
A0A024R5Z3	SMAD3	Inferred from homology	GO:0000977; GO:0007183; GO:0060395; GO:0042110; GO:0097296; GO:0031490; GO:0005737; GO:0048589; GO:0048701; GO:0048617; GO:0009880; GO:0007492; GO:0001947; GO:0002520; GO:0001701; GO:0070306; GO:0001889; GO:0001707; GO:0043066; GO:0050728; GO:0045668; GO:0033689; GO:0000122; GO:0061045; GO:0005654; GO:0002076; GO:0048340; GO:0060039; GO:0005886; GO:0010694; GO:0030501; GO:0030335; GO:0032332; GO:…		SUBCELLULAR LOCATION: Cytoplasm {ECO:0000256|RuleBase:RU361195}. Nucleus {ECO:0000256|RuleBase:RU361195}.; SUBCELLULAR LOCATION: Nucleus {ECO:0000256|SAAS:SAAS00573677}.
A0A024R5Z5	GTF2A2	Inferred from homology	GO:0030054; GO:0005654; GO:0045944; GO:0005672; GO:0006367		SUBCELLULAR LOCATION: Nucleus {ECO:0000256|PIRNR:PIRNR009415}.
A0A024R689	C14orf43	Predicted	GO:0003677; GO:0005654		SUBCELLULAR LOCATION: Nucleus {ECO:0000256|SAAS:SAAS00548613}.
A0A024R6P5	MTA1	Predicted	GO:0003682; GO:0005634; GO:0043565; GO:0003700; GO:0008270		SUBCELLULAR LOCATION: Nucleus {ECO:0000256|SAAS:SAAS00548613}.
A0A024R6U1	KATNB1	Inferred from homology	GO:0051301; GO:0005813; GO:0008352; GO:0005874; GO:0051013; GO:0007079; GO:0031117; GO:0000922		SUBCELLULAR LOCATION: Cytoplasm {ECO:0000256|HAMAP-Rule:MF_03022}. Cytoplasm, cytoskeleton, microtubule organizing center, centrosome {ECO:0000256|HAMAP-Rule:MF_03022}. Cytoplasm, cytoskeleton, spindle pole {ECO:0000256|HAMAP-Rule:MF_03022}. Cytoplasm, cytoskeleton {ECO:0000256|HAMAP-Rule:MF_03022}. Note=Predominantly cytoplasmic. Localized to the interphase centrosome and mitotic spindle poles. …
A0A024R6U4	BBS2	Predicted	GO:0034464; GO:0060170; GO:0005737; GO:0005815; GO:0035058		SUBCELLULAR LOCATION: Cell projection, cilium membrane {ECO:0000256|PIRNR:PIRNR013684}. Cytoplasm, cytoskeleton, microtubule organizing center, centrosome, centriolar satellite {ECO:0000256|PIRNR:PIRNR013684}.
A0A024R6V6	C16orf57	Inferred from homology	GO:0008380; GO:0034477; GO:0045171; GO:0006397; GO:0004518; GO:0005634		SUBCELLULAR LOCATION: Nucleus {ECO:0000256|HAMAP-Rule:MF_03040}.
A0A024R6X7	hCG_2025835	Inferred from homology	GO:0043010; GO:0048468; GO:0033169; GO:0000122; GO:0005654; GO:0045597; GO:0008284; GO:0045944; GO:0070207; GO:0043565; GO:0003700; GO:0007601		SUBCELLULAR LOCATION: Nucleus {ECO:0000256|SAAS:SAAS00535900}.
A0A024R752	FOXP2	Predicted	GO:0005634; GO:0043565; GO:0003700; GO:0006351		SUBCELLULAR LOCATION: Nucleus {ECO:0000256|SAAS:SAAS00582275}.
A0A024R7E3	DNMT1	Inferred from homology	GO:0003886; GO:0003677; GO:0003682; GO:0005634; GO:0008270		SUBCELLULAR LOCATION: Nucleus {ECO:0000256|PIRNR:PIRNR037404}.
A0A024R7K5	MEF2B	Predicted	GO:0003677; GO:0005634; GO:0006355; GO:0006351		SUBCELLULAR LOCATION: Nucleus {ECO:0000256|RuleBase:RU000476, ECO:0000256|SAAS:SAAS00579852}.
A0A024R7N0	MEF2B	Predicted	GO:0003677; GO:0005634; GO:0006355; GO:0006351		SUBCELLULAR LOCATION: Nucleus {ECO:0000256|RuleBase:RU000476, ECO:0000256|SAAS:SAAS00579852}.
A0A024R7P5	LOC388524	Inferred from homology	GO:0015935; GO:0003735; GO:0006412		SUBCELLULAR LOCATION: Cytoplasm {ECO:0000256|SAAS:SAAS00536002}.
A0A024R7U6	MCM4	Inferred from homology	GO:0005524; GO:0003677; GO:0003678; GO:0006270; GO:0042555; GO:0005634		SUBCELLULAR LOCATION: Nucleus {ECO:0000256|SAAS:SAAS00534438}.
A0A024R7V7	CHD7	Predicted	GO:0005524; GO:0016817; GO:0005634		SUBCELLULAR LOCATION: Nucleus {ECO:0000256|SAAS:SAAS00539527}.
A0A024R7Z0	PLAG1	Predicted	GO:0022612; GO:0046872; GO:0035264; GO:0010629; GO:0003676; GO:0005634; GO:0010628; GO:0060252; GO:0060736; GO:0003700; GO:0006351		SUBCELLULAR LOCATION: Nucleus {ECO:0000256|SAAS:SAAS00535819}.
A0A024R821	EIF3S9	Inferred from homology	GO:0005737; GO:0016282; GO:0033290; GO:0071541; GO:0001731; GO:0005654; GO:0000166; GO:0006446; GO:0003743		SUBCELLULAR LOCATION: Cytoplasm {ECO:0000256|HAMAP-Rule:MF_03001, ECO:0000256|PIRNR:PIRNR036424, ECO:0000256|SAAS:SAAS00319717}.
A0A024R829	POLE3	Predicted	GO:0005634		SUBCELLULAR LOCATION: Nucleus {ECO:0000256|SAAS:SAAS00572571}.
A0A024R852	LHX6	Predicted	GO:0005634; GO:0006355; GO:0043565; GO:0008270		SUBCELLULAR LOCATION: Nucleus {ECO:0000256|RuleBase:RU000682, ECO:0000256|SAAS:SAAS00397436}.
A0A024R864	PBX3	Predicted	GO:0005634; GO:0043565; GO:0003700		SUBCELLULAR LOCATION: Nucleus {ECO:0000256|RuleBase:RU000682}.
A0A024R885	CIZ1	Predicted	GO:0003676; GO:0005634; GO:0008270		SUBCELLULAR LOCATION: Nucleus {ECO:0000256|SAAS:SAAS00591741}.
A0A024R8C7	C9orf74	Inferred from homology	GO:0005829; GO:0032447; GO:0034227; GO:0002098		SUBCELLULAR LOCATION: Cytoplasm {ECO:0000256|HAMAP-Rule:MF_03048, ECO:0000256|RuleBase:RU361182, ECO:0000256|SAAS:SAAS00357733}.
A0A024R8S3	SUMO2	Inferred from homology	GO:0005634; GO:0016925		SUBCELLULAR LOCATION: Nucleus {ECO:0000256|RuleBase:RU361190}.
A0A024R8Y2	POU2F1	Inferred from homology	GO:0005783; GO:0043231; GO:0005654; GO:0043565; GO:0003700; GO:0006351		SUBCELLULAR LOCATION: Nucleus {ECO:0000256|RuleBase:RU361194, ECO:0000256|SAAS:SAAS00553137}.
A0A024R919	PBX1	Predicted	GO:0000978; GO:0030325; GO:0009952; GO:0001658; GO:0005737; GO:0035162; GO:0030326; GO:0048706; GO:0045665; GO:0005634; GO:0010971; GO:0008284; GO:0009954; GO:0030278; GO:0048536; GO:0048538; GO:0005667; GO:0001077		SUBCELLULAR LOCATION: Nucleus {ECO:0000256|RuleBase:RU000682}.
A0A024R974	ELF3	Inferred from homology	GO:0000978; GO:0001824; GO:0030855; GO:0030198; GO:0006954; GO:0060056; GO:0005634; GO:0001077		SUBCELLULAR LOCATION: Nucleus {ECO:0000256|SAAS:SAAS00594387}.
A0A024R997	ELK4	Inferred from homology	GO:0005737; GO:0005654; GO:0043565; GO:0003700		SUBCELLULAR LOCATION: Nucleus {ECO:0000256|SAAS:SAAS00594387}.
A0A024R998	PPP1R12B	Predicted	GO:0005737; GO:0019208; GO:0007165		SUBCELLULAR LOCATION: Cytoplasm {ECO:0000256|PIRNR:PIRNR038141}.
A0A024R9B2	PPP1R12B	Predicted	GO:0005737; GO:0019208; GO:0007165		SUBCELLULAR LOCATION: Cytoplasm {ECO:0000256|PIRNR:PIRNR038141}.
A0A024R9C1	PABPC1	Inferred from homology	GO:0003723; GO:0005737; GO:0000166		SUBCELLULAR LOCATION: Cytoplasm {ECO:0000256|RuleBase:RU362004}.
A0A024R9C2	ELK4	Inferred from homology	GO:0005737; GO:0005654; GO:0043565; GO:0003700		SUBCELLULAR LOCATION: Nucleus {ECO:0000256|SAAS:SAAS00594387}.
A0A024R9D9	ENY2	Inferred from homology	GO:0071819; GO:0000124; GO:0016578; GO:0030374; GO:0006406; GO:0061179; GO:0005643; GO:0045893; GO:0015031; GO:0006368; GO:0070390		SUBCELLULAR LOCATION: Nucleus, nucleoplasm {ECO:0000256|HAMAP-Rule:MF_03046}. Nucleus, nuclear pore complex {ECO:0000256|HAMAP-Rule:MF_03046}.
A0A024R9F1	hCG_2044510	Predicted	GO:0003677; GO:0046872; GO:0005654		SUBCELLULAR LOCATION: Nucleus {ECO:0000256|RuleBase:RU000682}.
A0A024R9I7	MEIS2	Predicted	GO:0003677; GO:0005634; GO:0006355		SUBCELLULAR LOCATION: Nucleus {ECO:0000256|SAAS:SAAS00563020}.
A0A024R9L4	MEIS2	Predicted	GO:0003677; GO:0005634; GO:0006355		SUBCELLULAR LOCATION: Nucleus {ECO:0000256|SAAS:SAAS00563020}.
A0A024R9N2	FANCC	Evidence at transcript level	GO:0006281; GO:0043240; GO:0000785; GO:0005737		SUBCELLULAR LOCATION: Nucleus {ECO:0000256|PIRNR:PIRNR018417}.
A0A024R9X5	GNPDA2	Inferred from homology	GO:0006044; GO:0005975; GO:0005737; GO:0004342; GO:0016787		SUBCELLULAR LOCATION: Cytoplasm {ECO:0000256|RuleBase:RU361197}.
A0A024R9Y0	MAPT	Predicted	GO:0005737; GO:0005874		SUBCELLULAR LOCATION: Cytoplasm, cytoskeleton {ECO:0000256|RuleBase:RU000686}.
A0A024R9Y1	MAPT	Predicted	GO:0005737; GO:0005874		SUBCELLULAR LOCATION: Cytoplasm, cytoskeleton {ECO:0000256|RuleBase:RU000686}.
A0A024R9Z8	AHR	Predicted	GO:0003677; GO:0004874; GO:0034751; GO:0071385; GO:0005737; GO:0005829; GO:0005654; GO:0001541; GO:0032355; GO:0009410; GO:0003700; GO:0006351		SUBCELLULAR LOCATION: Nucleus {ECO:0000256|SAAS:SAAS00600858}.
A0A024RA17	MAPT	Predicted	GO:0005737; GO:0005874		SUBCELLULAR LOCATION: Cytoplasm, cytoskeleton {ECO:0000256|RuleBase:RU000686}.
A0A024RA19	MAPT	Predicted	GO:0005737; GO:0005874		SUBCELLULAR LOCATION: Cytoplasm, cytoskeleton {ECO:0000256|RuleBase:RU000686}.
A0A024RA33	HOXA3	Inferred from homology	GO:0009952; GO:0001974; GO:0051216; GO:0048704; GO:0021615; GO:0005654; GO:0048645; GO:0060017; GO:0008284; GO:0043565; GO:0010159; GO:0048538; GO:0030878; GO:0003700		SUBCELLULAR LOCATION: Nucleus {ECO:0000256|RuleBase:RU000682, ECO:0000256|SAAS:SAAS00544279}.
A0A024RA37	HOXA10	Predicted	GO:0005634; GO:0006355; GO:0043565		SUBCELLULAR LOCATION: Nucleus {ECO:0000256|RuleBase:RU000682}.
A0A024RA52	PSMA2	Evidence at protein level	GO:0005737; GO:0005634; GO:0019773; GO:0004298; GO:0006511		SUBCELLULAR LOCATION: Cytoplasm {ECO:0000256|RuleBase:RU000551}. Nucleus {ECO:0000256|RuleBase:RU000551}.; SUBCELLULAR LOCATION: Nucleus {ECO:0000256|SAAS:SAAS00594407}.
A0A024RA81	NT5C3	Inferred from homology	GO:0008253; GO:0005737; GO:0000287; GO:0000166; GO:0009117		SUBCELLULAR LOCATION: Cytoplasm {ECO:0000256|RuleBase:RU361276}.
A0A024RAE8	PTPN4	Inferred from homology	GO:0005737; GO:0005856; GO:0004726		SUBCELLULAR LOCATION: Cytoplasm, cytoskeleton {ECO:0000256|PIRNR:PIRNR000927}.
A0A024RAL6	MEF2C	Predicted	GO:0003677; GO:0043231; GO:0005654; GO:0006355; GO:0006351		SUBCELLULAR LOCATION: Nucleus {ECO:0000256|RuleBase:RU000476, ECO:0000256|SAAS:SAAS00579852}.
A0A024RAL7	MEF2C	Predicted	GO:0003677; GO:0043231; GO:0005654; GO:0006355; GO:0006351		SUBCELLULAR LOCATION: Nucleus {ECO:0000256|RuleBase:RU000476, ECO:0000256|SAAS:SAAS00579852}.
A0A024RAS2	H2AFJ	Inferred from homology	GO:0003677; GO:0000786; GO:0005634		SUBCELLULAR LOCATION: Chromosome {ECO:0000256|SAAS:SAAS00534031}.; SUBCELLULAR LOCATION: Nucleus {ECO:0000256|RuleBase:RU000527, ECO:0000256|SAAS:SAAS00534029}.
A0A024RAV8	BHLHB3	Predicted	GO:0070888; GO:0000978; GO:0032922; GO:0010832; GO:0010944; GO:0005634; GO:0003714; GO:0003705; GO:0006351; GO:0001078; GO:0001191		SUBCELLULAR LOCATION: Nucleus {ECO:0000256|SAAS:SAAS00573650}.
A0A024RAZ6	HOXC9	Predicted	GO:0009952; GO:0048704; GO:0005634; GO:0006355; GO:0043565; GO:0006351		SUBCELLULAR LOCATION: Nucleus {ECO:0000256|RuleBase:RU000682, ECO:0000256|SAAS:SAAS00544279}.
A0A024RB22	SMARCC2	Predicted	GO:0003677; GO:0016514; GO:0003682; GO:0006338; GO:0071565; GO:0000122; GO:0071564; GO:0005654; GO:0021882		SUBCELLULAR LOCATION: Nucleus {ECO:0000256|SAAS:SAAS00548613}.
A0A024RB51	hCG_2043420	Inferred from homology	GO:0009952; GO:0051216; GO:0048562; GO:0005634; GO:0043565; GO:0003700		SUBCELLULAR LOCATION: Nucleus {ECO:0000256|RuleBase:RU000682, ECO:0000256|SAAS:SAAS00544279}.
A0A024RB62	METTL1	Inferred from homology	GO:0005737; GO:0005730; GO:0005654; GO:0005634; GO:0008176; GO:0000049		SUBCELLULAR LOCATION: Nucleus {ECO:0000256|HAMAP-Rule:MF_03055, ECO:0000256|SAAS:SAAS00496410}.
A0A024RB66	HOXC10	Predicted	GO:0005634; GO:0006355; GO:0043565		SUBCELLULAR LOCATION: Nucleus {ECO:0000256|RuleBase:RU000682}.
A0A024RB85	PA2G4	Predicted	GO:0005737; GO:0043066; GO:0005730; GO:0005654; GO:0005634; GO:0045597		SUBCELLULAR LOCATION: Cytoplasm {ECO:0000256|SAAS:SAAS00546213}.
A0A024RBE2	ELK3	Inferred from homology	GO:0001525; GO:0043231; GO:0005739; GO:0005654; GO:0043565; GO:0003700; GO:0042060		SUBCELLULAR LOCATION: Nucleus {ECO:0000256|SAAS:SAAS00594387}.
A0A024RBF1	PPP1R12A	Predicted	GO:0005737; GO:0019208; GO:0007165		SUBCELLULAR LOCATION: Cytoplasm {ECO:0000256|PIRNR:PIRNR038141}.
A0A024RBG7	NFYB	Predicted	GO:0016602; GO:0045893; GO:0043565; GO:0003700; GO:0044212		SUBCELLULAR LOCATION: Nucleus {ECO:0000256|SAAS:SAAS00572571}.
A0A024RBL6	TBX3	Predicted	GO:0003677; GO:0003167; GO:0001568; GO:0060444; GO:0060923; GO:0007569; GO:0042733; GO:0035116; GO:0001947; GO:0001701; GO:0021761; GO:0060596; GO:0043066; GO:0030857; GO:0000122; GO:0005634; GO:0003151; GO:0060021; GO:2000648; GO:0045893; GO:0060931; GO:0010159; GO:0019827; GO:0003700; GO:0006351; GO:0060412		SUBCELLULAR LOCATION: Nucleus {ECO:0000256|SAAS:SAAS00353240}.
A0A024RBM7	PRDM4	Predicted	GO:0003677; GO:0071363; GO:0031670; GO:0005737; GO:0035097; GO:0046872; GO:0030308; GO:0006355; GO:0006366		SUBCELLULAR LOCATION: Nucleus {ECO:0000256|PIRNR:PIRNR037161}.
A0A024RBQ4	TBX3	Predicted	GO:0003677; GO:0005634; GO:0003700; GO:0006351		SUBCELLULAR LOCATION: Nucleus {ECO:0000256|SAAS:SAAS00353240}.
A0A024RBS3	NCOR2	Predicted	GO:0003677; GO:0005654		SUBCELLULAR LOCATION: Nucleus {ECO:0000256|SAAS:SAAS00548613}.
A0A024RBU9	NCOR2	Predicted	GO:0003677; GO:0005634		SUBCELLULAR LOCATION: Nucleus {ECO:0000256|SAAS:SAAS00548613}.
A0A024RBZ0	hCG_1982709	Inferred from homology	GO:0003677; GO:0000278; GO:0005634; GO:0003713; GO:0003700; GO:0005667; GO:0006351		SUBCELLULAR LOCATION: Nucleus {ECO:0000256|RuleBase:RU003796}.
A0A024RC32	DTNA	Inferred from homology	GO:0005737; GO:0008270		SUBCELLULAR LOCATION: Cytoplasm {ECO:0000256|PIRNR:PIRNR038204}.
A0A024RC47	ZNF24	Predicted	GO:0046872; GO:0003676; GO:0005634; GO:0003700; GO:0006351		SUBCELLULAR LOCATION: Nucleus {ECO:0000256|SAAS:SAAS00574784}.
A0A024RC75	CHD2	Predicted	GO:0005524; GO:0001046; GO:0005634; GO:0006355		SUBCELLULAR LOCATION: Nucleus {ECO:0000256|SAAS:SAAS00539527}.
A0A024RC91	LASS3	Predicted	GO:0003677; GO:0005783; GO:0016021; GO:0005634		SUBCELLULAR LOCATION: Nucleus {ECO:0000256|RuleBase:RU000682}.	TRANSMEM 37 56 Helical. {ECO:0000256|SAM:Phobius}.; TRANSMEM 135 154 Helical. {ECO:0000256|SAM:Phobius}.; TRANSMEM 179 198 Helical. {ECO:0000256|SAM:Phobius}.; TRANSMEM 301 323 Helical. {ECO:0000256|SAM:Phobius}.
A0A024RC92	FES	Inferred from homology	GO:0005524; GO:0051297; GO:0005737; GO:0001578; GO:0015630; GO:0004715		SUBCELLULAR LOCATION: Cytoplasm, cytoskeleton {ECO:0000256|PIRNR:PIRNR000632}.
A0A024RCI2	ZNF96	Predicted	GO:0046872; GO:0003676; GO:0005634; GO:0003700; GO:0006351		SUBCELLULAR LOCATION: Nucleus {ECO:0000256|SAAS:SAAS00574784}.
A0A024RCJ2	HIST1H2BJ	Inferred from homology	GO:0003677; GO:0005737; GO:0005654; GO:0000786		SUBCELLULAR LOCATION: Chromosome {ECO:0000256|SAAS:SAAS00565666}.; SUBCELLULAR LOCATION: Nucleus {ECO:0000256|RuleBase:RU000451, ECO:0000256|SAAS:SAAS00566189}.
A0A024RCJ9	HIST1H2BN	Inferred from homology	GO:0003677; GO:0005737; GO:0005654; GO:0000786		SUBCELLULAR LOCATION: Chromosome {ECO:0000256|SAAS:SAAS00565666}.; SUBCELLULAR LOCATION: Nucleus {ECO:0000256|RuleBase:RU000451, ECO:0000256|SAAS:SAAS00566189}.
A0A024RCK7	ZNF192	Predicted	GO:0046872; GO:0003676; GO:0005634; GO:0003700; GO:0006351		SUBCELLULAR LOCATION: Nucleus {ECO:0000256|SAAS:SAAS00574784}.
A0A024RCK9	ZNF193	Predicted	GO:0046872; GO:0003676; GO:0005634; GO:0003700; GO:0006351		SUBCELLULAR LOCATION: Nucleus {ECO:0000256|SAAS:SAAS00574784}.
A0A024RCL4	ZNF323	Predicted	GO:0046872; GO:0003676; GO:0005634; GO:0003700; GO:0006351		SUBCELLULAR LOCATION: Nucleus {ECO:0000256|SAAS:SAAS00574784}.
A0A024RCL8	HIST1H2BK	Inferred from homology	GO:0003677; GO:0005737; GO:0005654; GO:0000786		SUBCELLULAR LOCATION: Chromosome {ECO:0000256|SAAS:SAAS00565666}.; SUBCELLULAR LOCATION: Nucleus {ECO:0000256|RuleBase:RU000451, ECO:0000256|SAAS:SAAS00566189}.
A0A024RCN4	ZSCAN26	Evidence at protein level	GO:0005737; GO:0046872; GO:0003676; GO:0005654; GO:0003700; GO:0006351		SUBCELLULAR LOCATION: Nucleus {ECO:0000256|SAAS:SAAS00574784}.
A0A024RCN9	EHMT2	Predicted	GO:0005694; GO:0018024; GO:0005654; GO:0008270		SUBCELLULAR LOCATION: Chromosome {ECO:0000256|SAAS:SAAS00563877}.; SUBCELLULAR LOCATION: Nucleus {ECO:0000256|RuleBase:RU004542, ECO:0000256|SAAS:SAAS00563921}.
A0A024RCR3	hCG_2039588	Predicted	GO:0003682; GO:0030326; GO:0005634; GO:0045944; GO:0009954; GO:0043565; GO:0003700; GO:0005667		SUBCELLULAR LOCATION: Nucleus {ECO:0000256|RuleBase:RU000682}.
A0A024RCW6	PPARD	Inferred from homology	GO:0004879; GO:0060612; GO:0008366; GO:0030154; GO:0031589; GO:0071456; GO:0071222; GO:0046697; GO:0007566; GO:0006635; GO:0005504; GO:0015908; GO:0007507; GO:0051546; GO:0043616; GO:0009299; GO:0043066; GO:0030308; GO:0032966; GO:0050680; GO:0050728; GO:0045662; GO:1902894; GO:0014912; GO:0048662; GO:0000790; GO:0008654; GO:0045684; GO:0010628; GO:0032024; GO:2000288; GO:0014068; GO:0043415; GO:…		SUBCELLULAR LOCATION: Nucleus {ECO:0000256|SAAS:SAAS00595767}.
A0A024RD16	SRF	Predicted	GO:0000978; GO:0008306; GO:0070830; GO:0060532; GO:0055003; GO:0060947; GO:0002042; GO:0007160; GO:0071333; GO:0031490; GO:0005737; GO:0048589; GO:0035912; GO:0090136; GO:0010669; GO:0048821; GO:0061029; GO:0060324; GO:0001947; GO:0060347; GO:0060218; GO:0021766; GO:0001701; GO:0060292; GO:0007616; GO:0060425; GO:0061145; GO:0042789; GO:0035855; GO:0001707; GO:0002011; GO:0046716; GO:0030336; GO:…		SUBCELLULAR LOCATION: Nucleus {ECO:0000256|RuleBase:RU000476, ECO:0000256|SAAS:SAAS00579852}.
A0A024RD47	NCOR1	Predicted	GO:0001012; GO:0021549; GO:0003682; GO:0007595; GO:0045892; GO:0005634; GO:0048471; GO:0008284; GO:0007519		SUBCELLULAR LOCATION: Nucleus {ECO:0000256|SAAS:SAAS00548613}.
A0A024RD50	TRERF1	Predicted	GO:0003677; GO:0046872; GO:0005634		SUBCELLULAR LOCATION: Nucleus {ECO:0000256|SAAS:SAAS00548613}.
A0A024RDL1	CCT6A	Inferred from homology	GO:0005524; GO:0005737; GO:0006457		SUBCELLULAR LOCATION: Cytoplasm {ECO:0000256|SAAS:SAAS00547836}.
A0A024RDN3	LOC221143	Inferred from homology	GO:0005737; GO:0003676; GO:0016279		SUBCELLULAR LOCATION: Cytoplasm {ECO:0000256|HAMAP-Rule:MF_03187}.
A0A024RDR3	SMAD9	Inferred from homology	GO:0003677; GO:0005737; GO:0005634; GO:0003700; GO:0005667; GO:0006351; GO:0007179		SUBCELLULAR LOCATION: Cytoplasm {ECO:0000256|RuleBase:RU361195}. Nucleus {ECO:0000256|RuleBase:RU361195}.; SUBCELLULAR LOCATION: Nucleus {ECO:0000256|SAAS:SAAS00573677}.
A0A024RDU6	ELF1	Inferred from homology	GO:0000978; GO:0050860; GO:0005654; GO:0001817; GO:0001077		SUBCELLULAR LOCATION: Nucleus {ECO:0000256|SAAS:SAAS00594387}.
A0A024RDU9	GTF2F2	Inferred from homology	GO:0005524; GO:0003677; GO:0004386; GO:0005675; GO:0015630; GO:0005634; GO:0045899; GO:0032968; GO:0005674; GO:0006367		SUBCELLULAR LOCATION: Nucleus {ECO:0000256|PIRNR:PIRNR015849}.
A0A024RDY4	TFDP1	Inferred from homology	GO:0003677; GO:0000278; GO:0005634; GO:0003713; GO:0003700; GO:0005667; GO:0006351		SUBCELLULAR LOCATION: Nucleus {ECO:0000256|RuleBase:RU003796}.
A0A068L529	TBLR1-RARA	Evidence at transcript level	GO:0005634; GO:0003708; GO:0043565; GO:0003707; GO:0006351; GO:0008270		SUBCELLULAR LOCATION: Nucleus {ECO:0000256|SAAS:SAAS00595767}.
A0A075B6F0	ZNF541	Evidence at protein level	GO:0003677; GO:0046872; GO:0005634		SUBCELLULAR LOCATION: Nucleus {ECO:0000256|SAAS:SAAS00548613}.
A0A075B6F9	NOSIP	Evidence at protein level	GO:0005737; GO:0005634; GO:0050999		SUBCELLULAR LOCATION: Cytoplasm {ECO:0000256|PIRNR:PIRNR023577}. Nucleus {ECO:0000256|PIRNR:PIRNR023577}.
A0A075B736	TUBB8	Evidence at protein level	GO:0005525; GO:0003924; GO:0005737; GO:0005874; GO:0007017; GO:0005200		SUBCELLULAR LOCATION: Cytoplasm, cytoskeleton {ECO:0000256|SAAS:SAAS00045381}.
A0A075B759	PPIAL4E	Inferred from homology	GO:0005737; GO:0003755; GO:0006457		SUBCELLULAR LOCATION: Cytoplasm {ECO:0000250|UniProtKB:P62937}.
A0A076MKN9	CDX2	Evidence at transcript level	GO:0003677; GO:0007275; GO:0005634; GO:0006355		SUBCELLULAR LOCATION: Nucleus {ECO:0000256|RuleBase:RU000682}.
A0A087WSW0	HELT	Predicted	GO:0003677; GO:0005634; GO:0006355; GO:0006351		SUBCELLULAR LOCATION: Nucleus {ECO:0000256|SAAS:SAAS00573650}.
A0A087WT22	TP53	Evidence at protein level	GO:0006915; GO:0007049; GO:0005737; GO:0046872; GO:0005634; GO:0003700; GO:0044212; GO:0006351		SUBCELLULAR LOCATION: Cytoplasm {ECO:0000256|RuleBase:RU003304}. Nucleus {ECO:0000256|RuleBase:RU003304}.
A0A087WTE5	EBF1	Evidence at protein level	GO:0003677; GO:0046872; GO:0007275; GO:0005634; GO:0006355; GO:0006351		SUBCELLULAR LOCATION: Nucleus {ECO:0000256|RuleBase:RU004489}.
A0A087WTJ6	CDX1	Evidence at protein level	GO:0005634; GO:0006355; GO:0043565		SUBCELLULAR LOCATION: Nucleus {ECO:0000256|RuleBase:RU000682, ECO:0000256|SAAS:SAAS00544279}.
A0A087WTT1	PABPC1	Evidence at protein level	GO:0003723; GO:0005737; GO:0000166		SUBCELLULAR LOCATION: Cytoplasm {ECO:0000256|RuleBase:RU362004}.
A0A087WU06	TUBGCP3	Evidence at protein level	GO:0005737; GO:0005874; GO:0007020; GO:0005815; GO:0000922		SUBCELLULAR LOCATION: Cytoplasm, cytoskeleton, microtubule organizing center {ECO:0000256|RuleBase:RU363050}.
A0A087WU18	ELF4	Evidence at protein level	GO:0001866; GO:0000981; GO:0045087; GO:0001787; GO:0005634; GO:0045944; GO:0043565		SUBCELLULAR LOCATION: Nucleus {ECO:0000256|SAAS:SAAS00594387}.
A0A087WUH0	NA	Evidence at protein level	GO:0004519; GO:0006289; GO:0005634; GO:0003697		SUBCELLULAR LOCATION: Nucleus {ECO:0000256|SAAS:SAAS00537425}.
A0A087WUK4	NR2C1	Evidence at protein level	GO:0005634; GO:0043565; GO:0043401; GO:0003700; GO:0006351; GO:0008270		SUBCELLULAR LOCATION: Nucleus {ECO:0000256|SAAS:SAAS00595767}.
A0A087WUL8	NBPF19	Uncertain	GO:0005737		SUBCELLULAR LOCATION: Cytoplasm {ECO:0000305}.
A0A087WUM8	NA	Evidence at protein level	GO:0046872; GO:0003676; GO:0005634; GO:0003700; GO:0006351		SUBCELLULAR LOCATION: Nucleus {ECO:0000256|SAAS:SAAS00574784}.
A0A087WV14	NA	Evidence at protein level	GO:0005634; GO:0006355; GO:0043565		SUBCELLULAR LOCATION: Nucleus {ECO:0000256|RuleBase:RU000682, ECO:0000256|SAAS:SAAS00544279}.
A0A087WVB7	SHOX2	Evidence at protein level	GO:0005634; GO:0006355; GO:0043565		SUBCELLULAR LOCATION: Nucleus {ECO:0000256|RuleBase:RU000682, ECO:0000256|SAAS:SAAS00159552}.
A0A087WVB9	EIF3K	Evidence at protein level	GO:0016282; GO:0033290; GO:0005852; GO:0001731; GO:0005634; GO:0006446; GO:0043022; GO:0003743		SUBCELLULAR LOCATION: Cytoplasm {ECO:0000256|SAAS:SAAS00533625}.; SUBCELLULAR LOCATION: Nucleus {ECO:0000256|HAMAP-Rule:MF_03010}. Cytoplasm {ECO:0000256|HAMAP-Rule:MF_03010}.
A0A087WVE9	ARNT2	Evidence at protein level	GO:0003677; GO:0005737; GO:0005634; GO:0003700; GO:0005667; GO:0006351		SUBCELLULAR LOCATION: Nucleus {ECO:0000256|SAAS:SAAS00600858}.
A0A087WVG7	NA	Predicted	GO:0003677; GO:0030154; GO:0007399; GO:0005634; GO:0006355; GO:0006351		SUBCELLULAR LOCATION: Nucleus {ECO:0000256|PIRNR:PIRNR015618}.
A0A087WVL9	TUBGCP5	Evidence at protein level	GO:0005737; GO:0005874; GO:0007020; GO:0005815; GO:0000922		SUBCELLULAR LOCATION: Cytoplasm, cytoskeleton, microtubule organizing center {ECO:0000256|RuleBase:RU363050}.
A0A087WVU3	NKX2-3	Evidence at protein level	GO:0005634; GO:0006355; GO:0043565		SUBCELLULAR LOCATION: Nucleus {ECO:0000256|RuleBase:RU000682, ECO:0000256|SAAS:SAAS00544279}.
A0A087WVZ8	TUBGCP5	Evidence at protein level	GO:0005737; GO:0005874; GO:0007020; GO:0005815; GO:0000922		SUBCELLULAR LOCATION: Cytoplasm, cytoskeleton, microtubule organizing center {ECO:0000256|RuleBase:RU363050}.
A0A087WW44	FANCC	Evidence at protein level	GO:0006281; GO:0043240; GO:0005737		SUBCELLULAR LOCATION: Nucleus {ECO:0000256|PIRNR:PIRNR018417}.
A0A087WW95	NA	Evidence at protein level	GO:0003677; GO:0005634; GO:0003700; GO:0006351		SUBCELLULAR LOCATION: Nucleus {ECO:0000256|SAAS:SAAS00353240}.
A0A087WWB5	NA	Evidence at protein level	GO:0005737; GO:0005874; GO:0007020; GO:0005815; GO:0000922		SUBCELLULAR LOCATION: Cytoplasm, cytoskeleton, microtubule organizing center {ECO:0000256|RuleBase:RU363050}.
A0A087WWK1	ZNF518A	Evidence at protein level	GO:0046872; GO:0003676; GO:0005634; GO:0003700; GO:0006351		SUBCELLULAR LOCATION: Nucleus {ECO:0000256|SAAS:SAAS00535819}.
A0A087WWK3	CDKN3	Evidence at protein level	GO:0007049; GO:0048471; GO:0004725		SUBCELLULAR LOCATION: Cytoplasm, perinuclear region {ECO:0000256|PIRNR:PIRNR037322}.
A0A087WWK9	NA	Evidence at protein level	GO:0005634; GO:0006355; GO:0043565		SUBCELLULAR LOCATION: Nucleus {ECO:0000256|RuleBase:RU000682, ECO:0000256|SAAS:SAAS00544279}.
A0A087WWR4	TADA2A	Evidence at protein level	GO:0003677; GO:0005634		SUBCELLULAR LOCATION: Nucleus {ECO:0000256|SAAS:SAAS00548613}.
A0A087WXP2	NFIB	Evidence at protein level	GO:0006260; GO:0005634; GO:0003700; GO:0006351		SUBCELLULAR LOCATION: Nucleus {ECO:0000256|SAAS:SAAS00573677}.
A0A087WXQ8	PSMB3	Evidence at protein level	GO:0005634; GO:0005839; GO:0051603; GO:0004298		SUBCELLULAR LOCATION: Nucleus {ECO:0000256|SAAS:SAAS00551005}.
A0A087WXR4	PGR	Evidence at protein level	GO:0005634; GO:0043565; GO:0005496; GO:0003707; GO:0003700; GO:0006351; GO:0008270		SUBCELLULAR LOCATION: Nucleus {ECO:0000256|SAAS:SAAS00595767}.
A0A087WXU6	NA	Evidence at protein level	GO:0003677; GO:0005634; GO:0006355		SUBCELLULAR LOCATION: Nucleus {ECO:0000256|SAAS:SAAS00563020}.
A0A087WXV4	HNF4A	Evidence at protein level	GO:0004879; GO:0005634; GO:0043565; GO:0003707; GO:0006351; GO:0008270		SUBCELLULAR LOCATION: Nucleus {ECO:0000256|SAAS:SAAS00595767}.
A0A087WXV5	PAX1	Evidence at protein level	GO:0003677; GO:0007275; GO:0005634; GO:0003700; GO:0006351		SUBCELLULAR LOCATION: Nucleus {ECO:0000256|RuleBase:RU000491, ECO:0000256|SAAS:SAAS00117811}.
A0A087WXZ1	TP53	Evidence at protein level	GO:0006915; GO:0007049; GO:0005737; GO:0046872; GO:0005634; GO:0003700; GO:0044212; GO:0006351		SUBCELLULAR LOCATION: Cytoplasm {ECO:0000256|RuleBase:RU003304}. Nucleus {ECO:0000256|RuleBase:RU003304}.
A0A087WY10	PSMB3	Evidence at protein level	GO:0005634; GO:0005839; GO:0051603; GO:0004298		SUBCELLULAR LOCATION: Nucleus {ECO:0000256|SAAS:SAAS00551005}.
A0A087WYK3	TADA2A	Evidence at protein level	GO:0003677; GO:0016573; GO:0005634; GO:0006357		SUBCELLULAR LOCATION: Nucleus {ECO:0000256|SAAS:SAAS00548613}.
A0A087WYL7	MED6	Evidence at protein level	GO:0001104; GO:0016592; GO:0006351; GO:0000151; GO:0061630		SUBCELLULAR LOCATION: Nucleus {ECO:0000256|PIRNR:PIRNR023869}.
A0A087WYZ9	SETDB2	Evidence at protein level	GO:0003677; GO:0005694; GO:0018024; GO:0005634; GO:0008270		SUBCELLULAR LOCATION: Chromosome {ECO:0000256|SAAS:SAAS00563877}.; SUBCELLULAR LOCATION: Nucleus {ECO:0000256|RuleBase:RU004542, ECO:0000256|SAAS:SAAS00563921}.
A0A087WZ66	AR	Evidence at protein level	GO:0004882; GO:0005634; GO:0043565; GO:0005496; GO:0006351; GO:0008270		SUBCELLULAR LOCATION: Nucleus {ECO:0000256|SAAS:SAAS00586772}.
A0A087WZ88	RXRG	Inferred from homology	GO:0005634; GO:0043565; GO:0003707; GO:0003700; GO:0006351; GO:0008270		SUBCELLULAR LOCATION: Nucleus {ECO:0000256|SAAS:SAAS00595767}.
A0A087WZC2	HNF1B	Evidence at protein level	GO:0003677; GO:0005634; GO:0045893		SUBCELLULAR LOCATION: Nucleus {ECO:0000256|RuleBase:RU000682}.
A0A087WZK9	EIF3H	Evidence at protein level	GO:0016282; GO:0033290; GO:0005852; GO:0001731; GO:0003743		SUBCELLULAR LOCATION: Cytoplasm {ECO:0000256|HAMAP-Rule:MF_03007}.
A0A087WZU8	TP53	Evidence at protein level	GO:0006915; GO:0007049; GO:0005737; GO:0046872; GO:0005634; GO:0051262; GO:0003700; GO:0044212; GO:0006351		SUBCELLULAR LOCATION: Cytoplasm {ECO:0000256|RuleBase:RU003304}. Nucleus {ECO:0000256|RuleBase:RU003304}.
A0A087WZV5	TUBGCP3	Evidence at protein level	GO:0005737; GO:0005874; GO:0007020; GO:0005815; GO:0000922		SUBCELLULAR LOCATION: Cytoplasm, cytoskeleton, microtubule organizing center {ECO:0000256|RuleBase:RU363050}.
A0A087WZV9	NA	Evidence at protein level	GO:0019478; GO:0005737; GO:0016788; GO:0016021		SUBCELLULAR LOCATION: Cytoplasm {ECO:0000256|RuleBase:RU003470}.	TRANSMEM 12 31 Helical. {ECO:0000256|SAM:Phobius}.
A0A087X006	TUBGCP5	Evidence at protein level	GO:0005737; GO:0005874; GO:0007020; GO:0005815; GO:0000922		SUBCELLULAR LOCATION: Cytoplasm, cytoskeleton, microtubule organizing center {ECO:0000256|RuleBase:RU363050}.
A0A087X0B6	E2F3	Evidence at protein level	GO:0003677; GO:0005634; GO:0003700; GO:0005667; GO:0006351		SUBCELLULAR LOCATION: Nucleus {ECO:0000256|RuleBase:RU003796}.
A0A087X0P4	PBX1	Evidence at protein level	GO:0005634; GO:0043565; GO:0003700		SUBCELLULAR LOCATION: Nucleus {ECO:0000256|RuleBase:RU000682}.
A0A087X1B6	AR	Evidence at protein level	GO:0004882; GO:0005634; GO:0043565; GO:0005496; GO:0006351; GO:0008270		SUBCELLULAR LOCATION: Nucleus {ECO:0000256|SAAS:SAAS00595767}.
A0A087X1C2	REST	Evidence at protein level	GO:0046872; GO:0003676; GO:0005634; GO:0003700; GO:0006351		SUBCELLULAR LOCATION: Nucleus {ECO:0000256|SAAS:SAAS00535819}.
A0A087X1C5	CYP2D7	Uncertain	GO:0070330; GO:0005737; GO:0042738; GO:0020037; GO:0016021; GO:0005506; GO:0005739; GO:0006805		SUBCELLULAR LOCATION: Membrane {ECO:0000305}; Multi-pass membrane protein {ECO:0000255}. Cytoplasm {ECO:0000305|PubMed:15051713}. Mitochondrion {ECO:0000269|PubMed:18838503}.	TRANSMEM 3 23 Helical; Name=1. {ECO:0000255}.; TRANSMEM 302 322 Helical; Name=2. {ECO:0000255}.
A0A087X1Q1	TP53	Evidence at protein level	GO:0006915; GO:0007049; GO:0005737; GO:0046872; GO:0005634; GO:0051262; GO:0003700; GO:0044212; GO:0006351		SUBCELLULAR LOCATION: Cytoplasm {ECO:0000256|RuleBase:RU003304}. Nucleus {ECO:0000256|RuleBase:RU003304}.
A0A087X1W9	ELF5	Evidence at protein level	GO:0000981; GO:0005634; GO:0043565		SUBCELLULAR LOCATION: Nucleus {ECO:0000256|SAAS:SAAS00594387}.
A0A087X1Z1	TUBGCP5	Evidence at protein level	GO:0005737; GO:0005874; GO:0007020; GO:0005815; GO:0000922		SUBCELLULAR LOCATION: Cytoplasm, cytoskeleton, microtubule organizing center {ECO:0000256|RuleBase:RU363050}.
A0A087X222	NA	Evidence at protein level	GO:0005634; GO:0006355; GO:0043565; GO:0006351		SUBCELLULAR LOCATION: Nucleus {ECO:0000256|RuleBase:RU000682, ECO:0000256|SAAS:SAAS00544279}.
A0A087X299	NA	Evidence at protein level	GO:0000978; GO:0061470; GO:0055007; GO:0003682; GO:0033152; GO:0001701; GO:0072619; GO:0061140; GO:0008045; GO:1901250; GO:0000122; GO:0005634; GO:2000727; GO:0050679; GO:0002639; GO:0002053; GO:0045944; GO:0002329; GO:0060043; GO:0045214; GO:0007519; GO:0048745; GO:0003705; GO:0006351; GO:0021517		SUBCELLULAR LOCATION: Nucleus {ECO:0000256|SAAS:SAAS00582275}.
A0A087X2B1	RBFOX1	Predicted	GO:0003723; GO:0008380; GO:0006397; GO:0000166; GO:0005634; GO:0043484		SUBCELLULAR LOCATION: Nucleus {ECO:0000256|PIRNR:PIRNR037932}.
A0A087X2C8	TADA2A	Predicted	GO:0003677; GO:0016573; GO:0005634; GO:0006357		SUBCELLULAR LOCATION: Nucleus {ECO:0000256|SAAS:SAAS00548613}.
A0A087X2F7	ELK4	Evidence at protein level	GO:0005634; GO:0043565; GO:0003700		SUBCELLULAR LOCATION: Nucleus {ECO:0000256|SAAS:SAAS00594387}.
A0A087X2I4	PSMB6	Evidence at protein level	GO:0005737; GO:0005634; GO:0005839; GO:0051603; GO:0004298		SUBCELLULAR LOCATION: Cytoplasm {ECO:0000256|RuleBase:RU000694}. Nucleus {ECO:0000256|RuleBase:RU000694}.; SUBCELLULAR LOCATION: Nucleus {ECO:0000256|SAAS:SAAS00551005}.
A0A088AWL3	NCOR1	Evidence at protein level	GO:0003677; GO:0005634		SUBCELLULAR LOCATION: Nucleus {ECO:0000256|SAAS:SAAS00548613}.
A0A088AWM2	NA	Evidence at protein level	GO:0003677; GO:0005634		SUBCELLULAR LOCATION: Nucleus {ECO:0000256|RuleBase:RU000682}.
A0A089VKS7	Egr-1	Evidence at transcript level	GO:0003677; GO:0046872; GO:0005634; GO:0006355; GO:0006351		SUBCELLULAR LOCATION: Nucleus {ECO:0000256|RuleBase:RU363046}.
A0A090HNM7	ERCC5	Evidence at transcript level	GO:0004519; GO:0006289; GO:0005634; GO:0003697		SUBCELLULAR LOCATION: Nucleus {ECO:0000256|SAAS:SAAS00537425}.
A0A090J7P6	NA	Evidence at transcript level	GO:0004519; GO:0006289; GO:0005634; GO:0003697		SUBCELLULAR LOCATION: Nucleus {ECO:0000256|SAAS:SAAS00537425}.
A0A090N7T3	NEUROD6	Predicted	GO:0000978; GO:0030154; GO:0021542; GO:0005634; GO:0001077		SUBCELLULAR LOCATION: Nucleus {ECO:0000256|PIRNR:PIRNR015618}.
A0A090N7U2	NT5C3	Inferred from homology	GO:0008253; GO:0005737; GO:0000287; GO:0000166; GO:0009117		SUBCELLULAR LOCATION: Cytoplasm {ECO:0000256|RuleBase:RU361276}.
A0A090N7W7	LOC393070	Predicted	GO:0005634; GO:0006355; GO:0043565		SUBCELLULAR LOCATION: Nucleus {ECO:0000256|RuleBase:RU000682, ECO:0000256|SAAS:SAAS00544279}.
A0A090N8E5	LOC135935	Predicted	GO:0003677; GO:0005634		SUBCELLULAR LOCATION: Nucleus {ECO:0000256|RuleBase:RU000682}.
A0A096LNS4	ZNF638	Evidence at protein level	GO:0003676; GO:0005634; GO:0008270		SUBCELLULAR LOCATION: Nucleus {ECO:0000256|SAAS:SAAS00591741}.
A0A096LPK8	ZNF638	Evidence at protein level	GO:0003676; GO:0005634; GO:0008270		SUBCELLULAR LOCATION: Nucleus {ECO:0000256|SAAS:SAAS00591741}.
A0A0A0MQU7	HNF1A	Evidence at protein level	GO:0003677; GO:0005634; GO:0045893		SUBCELLULAR LOCATION: Nucleus {ECO:0000256|RuleBase:RU000682}.
A0A0A0MQV9	SETD1B	Evidence at protein level	GO:0008168; GO:0003676; GO:0000166; GO:0005634		SUBCELLULAR LOCATION: Nucleus {ECO:0000256|SAAS:SAAS00574581}.
A0A0A0MR47	ZNF274	Evidence at protein level	GO:0046872; GO:0003676; GO:0005634; GO:0003700; GO:0006351		SUBCELLULAR LOCATION: Nucleus {ECO:0000256|SAAS:SAAS00574784}.
A0A0A0MRB6	PAX4	Predicted	GO:0007275; GO:0005634; GO:0006355; GO:0043565; GO:0006351		SUBCELLULAR LOCATION: Nucleus {ECO:0000256|RuleBase:RU000491, ECO:0000256|SAAS:SAAS00117811}.
A0A0A0MRH0	NLE1	Evidence at protein level	GO:0005730		SUBCELLULAR LOCATION: Nucleus, nucleolus {ECO:0000256|SAAS:SAAS00556393}.
A0A0A0MRH7	PAX2	Evidence at protein level	GO:0003677; GO:0007275; GO:0005634; GO:0006355; GO:0006351		SUBCELLULAR LOCATION: Nucleus {ECO:0000256|RuleBase:RU000491, ECO:0000256|SAAS:SAAS00117811}.
A0A0A0MRP6	SMARCA1	Evidence at protein level	GO:0005524; GO:0043044; GO:0016887; GO:0003677; GO:0016589		SUBCELLULAR LOCATION: Nucleus {ECO:0000256|SAAS:SAAS00548613}.
A0A0A0MRR7	SNRPC	Evidence at protein level	GO:0030619; GO:0005685; GO:0071004; GO:0000243; GO:0000395; GO:0003729; GO:0000387; GO:0008270		SUBCELLULAR LOCATION: Nucleus {ECO:0000256|HAMAP-Rule:MF_03153, ECO:0000256|PIRNR:PIRNR037969, ECO:0000256|SAAS:SAAS00591741}.
A0A0A0MRX8	NFIB	Evidence at protein level	GO:0003677; GO:0006260; GO:0005634; GO:0003700; GO:0006351		SUBCELLULAR LOCATION: Nucleus {ECO:0000256|RuleBase:RU000690, ECO:0000256|SAAS:SAAS00573677}.
A0A0A0MS24	NA	Evidence at protein level	GO:0005737; GO:0019208; GO:0007165		SUBCELLULAR LOCATION: Cytoplasm {ECO:0000256|PIRNR:PIRNR038141}.
A0A0A0MS70	MYD88	Evidence at protein level	GO:0002755; GO:0005737; GO:0006954; GO:0043123		SUBCELLULAR LOCATION: Cytoplasm {ECO:0000256|PIRNR:PIRNR037756}.
A0A0A0MST0	NA	Evidence at protein level	GO:0007254; GO:0002755; GO:0008063; GO:0019221; GO:0005829; GO:0050830; GO:0090557; GO:0016064; GO:0009682; GO:0006954; GO:0031663; GO:0044130; GO:0005886; GO:0043123; GO:0046330; GO:0051092; GO:0045080; GO:0032740; GO:0032747; GO:0032755; GO:0050671; GO:0048661; GO:0032760; GO:0014069; GO:0043234; GO:2000338; GO:2000341; GO:0050727; GO:1902622; GO:0002238; GO:0032494; GO:0009615; GO:0045351		SUBCELLULAR LOCATION: Cytoplasm {ECO:0000256|PIRNR:PIRNR037756}.
A0A0A0MSU2	ELMSAN1	Evidence at protein level	GO:0003677; GO:0005634		SUBCELLULAR LOCATION: Nucleus {ECO:0000256|SAAS:SAAS00548613}.
A0A0A0MSW2	EBF4	Inferred from homology	GO:0003677; GO:0046872; GO:0007275; GO:0005634; GO:0006355; GO:0006351		SUBCELLULAR LOCATION: Nucleus {ECO:0000256|RuleBase:RU004489}.
A0A0A0MSX5	HOXD8	Evidence at protein level	GO:0007275; GO:0005634; GO:0043565; GO:0003700		SUBCELLULAR LOCATION: Nucleus {ECO:0000256|RuleBase:RU000682, ECO:0000256|SAAS:SAAS00544279}.
A0A0A0MT00	NFYC	Evidence at protein level	GO:0016602; GO:0003700		SUBCELLULAR LOCATION: Nucleus {ECO:0000256|SAAS:SAAS00572571}.
A0A0A0MT46	POU2F1	Evidence at protein level	GO:0005634; GO:0043565; GO:0003700; GO:0006351		SUBCELLULAR LOCATION: Nucleus {ECO:0000256|RuleBase:RU361194, ECO:0000256|SAAS:SAAS00553137}.
A0A0A0MT61	ATG4A	Evidence at protein level	GO:0006914; GO:0004197; GO:0005737; GO:0015031		SUBCELLULAR LOCATION: Cytoplasm {ECO:0000256|SAAS:SAAS00570686}.
A0A0A0MTF4	HOXD8	Evidence at protein level	GO:0007275; GO:0005634; GO:0043565; GO:0003700		SUBCELLULAR LOCATION: Nucleus {ECO:0000256|RuleBase:RU000682, ECO:0000256|SAAS:SAAS00544279}.
A0A0A0MTI0	PBX1	Evidence at protein level	GO:0003677; GO:0005634; GO:0003700		SUBCELLULAR LOCATION: Nucleus {ECO:0000256|RuleBase:RU000682}.
A0A0A0MTK8	HNF1A	Evidence at protein level	GO:0003677; GO:0005634; GO:0045893		SUBCELLULAR LOCATION: Nucleus {ECO:0000256|RuleBase:RU000682}.
A0A0A0U7X4	TP53	Inferred from homology	GO:0006915; GO:0007049; GO:0005737; GO:0046872; GO:0005634; GO:0003700; GO:0044212; GO:0006351		SUBCELLULAR LOCATION: Cytoplasm {ECO:0000256|RuleBase:RU003304}. Nucleus {ECO:0000256|RuleBase:RU003304}.
A0A0A0VEB4	GTF2I-RARA	Evidence at transcript level	GO:0005634; GO:0003708; GO:0043565; GO:0003707; GO:0006351; GO:0008270		SUBCELLULAR LOCATION: Nucleus {ECO:0000256|SAAS:SAAS00595767}.
A0A0A6YYL0	TGIF2-C20orf24	Predicted	GO:0003677; GO:0016021; GO:0005739; GO:0005634; GO:0006355		SUBCELLULAR LOCATION: Nucleus {ECO:0000256|SAAS:SAAS00563020}.	TRANSMEM 70 89 Helical. {ECO:0000256|SAM:Phobius}.; TRANSMEM 94 113 Helical. {ECO:0000256|SAM:Phobius}.; TRANSMEM 133 152 Helical. {ECO:0000256|SAM:Phobius}.
A0A0A7EP36	UNCX	Evidence at transcript level	GO:0003677; GO:0005634		SUBCELLULAR LOCATION: Nucleus {ECO:0000256|RuleBase:RU000682}.
A0A0A7EP75	UNCX	Evidence at transcript level	GO:0003677; GO:0005634		SUBCELLULAR LOCATION: Nucleus {ECO:0000256|RuleBase:RU000682}.
A0A0A7EPG2	UNCX	Evidence at transcript level	GO:0005634; GO:0006355; GO:0043565		SUBCELLULAR LOCATION: Nucleus {ECO:0000256|RuleBase:RU000682}.
A0A0B4J291	CDYL2	Evidence at protein level	GO:0003824; GO:0008152; GO:0005634		SUBCELLULAR LOCATION: Nucleus {ECO:0000256|SAAS:SAAS00539527}.
A0A0B4J2A2	PPIAL4C	Evidence at transcript level	GO:0005737; GO:0003755; GO:0006457		SUBCELLULAR LOCATION: Cytoplasm {ECO:0000250|UniProtKB:P62937}.
A0A0B4J2F3	FOXP1	Evidence at protein level	GO:0005634; GO:0043565; GO:0003700; GO:0006351		SUBCELLULAR LOCATION: Nucleus {ECO:0000256|SAAS:SAAS00582275}.
A0A0B4J2G2	ZNF446	Evidence at protein level	GO:0046872; GO:0003676; GO:0005634; GO:0003700; GO:0006351		SUBCELLULAR LOCATION: Nucleus {ECO:0000256|SAAS:SAAS00574784}.
A0A0B5HBE9	PITX3	Predicted	GO:0003677; GO:0005634		SUBCELLULAR LOCATION: Nucleus {ECO:0000256|RuleBase:RU000682}.
A0A0B5J4B6	FOXE3	Predicted	GO:0005634; GO:0043565; GO:0003700; GO:0006351		SUBCELLULAR LOCATION: Nucleus {ECO:0000256|SAAS:SAAS00582275}.
A0A0C4DFL8	KDM4B	Evidence at protein level	GO:0070544; GO:0032454; GO:1900113; GO:0031618; GO:0008270		SUBCELLULAR LOCATION: Nucleus {ECO:0000256|SAAS:SAAS00575847}.
A0A0C4DFN0	ZSCAN25	Evidence at protein level	GO:0046872; GO:0003676; GO:0005634; GO:0003700; GO:0006351		SUBCELLULAR LOCATION: Nucleus {ECO:0000256|SAAS:SAAS00574784}.
A0A0C4DFP5	RORA	Inferred from homology	GO:0004879; GO:0005634; GO:0043565; GO:0003707; GO:0006351; GO:0008270		SUBCELLULAR LOCATION: Nucleus {ECO:0000256|SAAS:SAAS00595767}.
A0A0C4DFQ3	ZSCAN2	Evidence at protein level	GO:0046872; GO:0003676; GO:0005634; GO:0003700; GO:0006351		SUBCELLULAR LOCATION: Nucleus {ECO:0000256|SAAS:SAAS00574784}.
A0A0C4DFW2	ING1	Evidence at protein level	GO:0016568; GO:0008285; GO:0005634; GO:0045893; GO:0006606; GO:0010941; GO:0008270		SUBCELLULAR LOCATION: Nucleus {ECO:0000256|RuleBase:RU361213}.
A0A0C4DFW6	FOXP3	Evidence at protein level	GO:0046872; GO:0005634; GO:0043565; GO:0003700; GO:0006351		SUBCELLULAR LOCATION: Nucleus {ECO:0000256|SAAS:SAAS00582275}.
A0A0C4DFW9	TP73	Evidence at protein level	GO:0006915; GO:0007050; GO:0005737; GO:0046872; GO:0005634; GO:0051262; GO:0003700; GO:0044212; GO:0006351		SUBCELLULAR LOCATION: Cytoplasm {ECO:0000256|RuleBase:RU003304}. Nucleus {ECO:0000256|RuleBase:RU003304}.
A0A0C4DFZ9	PAN3	Evidence at protein level	GO:0005524; GO:0031251; GO:0000932; GO:0006397; GO:0000289; GO:0044822; GO:0010606; GO:0004672		SUBCELLULAR LOCATION: Cytoplasm, P-body {ECO:0000256|HAMAP-Rule:MF_03181}.
A0A0C4DG07	NBN	Evidence at protein level	GO:0006281; GO:0030870; GO:0000781; GO:0051321; GO:0007093; GO:0000723		SUBCELLULAR LOCATION: Nucleus {ECO:0000256|PIRNR:PIRNR011869}.
A0A0C4DG17	RPSA	Evidence at protein level	GO:0005604; GO:0022627; GO:0030855; GO:0005055; GO:0043025; GO:0005634; GO:0005886; GO:0000028; GO:0016337; GO:0003735; GO:0006412		SUBCELLULAR LOCATION: Cell membrane {ECO:0000256|HAMAP-Rule:MF_03016}. Cytoplasm {ECO:0000256|HAMAP-Rule:MF_03016}. Nucleus {ECO:0000256|HAMAP-Rule:MF_03016}. Note=67LR is found at the surface of the plasma membrane, with its C-terminal laminin-binding domain accessible to extracellular ligands. 37LRP is found at the cell surface, in the cytoplasm and in the nucleus. Co-localizes with PPP1R16B in…
A0A0C4DG41	ERG	Evidence at protein level	GO:0005634; GO:0043565; GO:0003700		SUBCELLULAR LOCATION: Nucleus {ECO:0000256|SAAS:SAAS00594387}.
A0A0C4DG53	RORA	Inferred from homology	GO:0004879; GO:0005634; GO:0043565; GO:0003707; GO:0006351; GO:0008270		SUBCELLULAR LOCATION: Nucleus {ECO:0000256|SAAS:SAAS00595767}.
A0A0C4DG78	ZSCAN18	Evidence at protein level	GO:0046872; GO:0003676; GO:0005634; GO:0003700; GO:0006351		SUBCELLULAR LOCATION: Nucleus {ECO:0000256|SAAS:SAAS00535819}.
A0A0C4DG88	POU2F1	Evidence at protein level	GO:0005634; GO:0043565; GO:0003700; GO:0006351		SUBCELLULAR LOCATION: Nucleus {ECO:0000256|RuleBase:RU361194, ECO:0000256|SAAS:SAAS00553137}.
A0A0C4DGF8	EHMT1	Evidence at protein level	GO:0018024; GO:0005634; GO:0008270		SUBCELLULAR LOCATION: Nucleus {ECO:0000256|RuleBase:RU004542}.
A0A0C4DGG9	CHD4	Evidence at protein level	GO:0005524; GO:0008026; GO:0003677; GO:0016581; GO:0006325; GO:0006355; GO:0051225; GO:0008270		SUBCELLULAR LOCATION: Nucleus {ECO:0000256|SAAS:SAAS00539527}.
A0A0C4DGK8	APEX1	Evidence at protein level	GO:0003677; GO:0006281; GO:0003906; GO:0046872; GO:0005739; GO:0005634		SUBCELLULAR LOCATION: Nucleus {ECO:0000256|RuleBase:RU362131}. Cytoplasm {ECO:0000256|RuleBase:RU362131}. Mitochondrion {ECO:0000256|RuleBase:RU362131}.
A0A0C4DGM2	ZSCAN29	Evidence at protein level	GO:0046872; GO:0003676; GO:0005634; GO:0003700; GO:0006351		SUBCELLULAR LOCATION: Nucleus {ECO:0000256|SAAS:SAAS00574784}.
A0A0C4DGQ1	ZSCAN5A	Evidence at protein level	GO:0046872; GO:0003676; GO:0005634; GO:0003700; GO:0006351		SUBCELLULAR LOCATION: Nucleus {ECO:0000256|SAAS:SAAS00574784}.
A0A0C4DGR5	ZNF496	Evidence at protein level	GO:0046872; GO:0003676; GO:0005634; GO:0003700; GO:0006351		SUBCELLULAR LOCATION: Nucleus {ECO:0000256|SAAS:SAAS00535819}.
A0A0C4DGS8	HNF1B	Evidence at protein level	GO:0003677; GO:0005634; GO:0045893		SUBCELLULAR LOCATION: Nucleus {ECO:0000256|RuleBase:RU000682}.
A0A0C4DGW4	NA	Evidence at protein level	GO:0016055; GO:0006915; GO:0007050; GO:0005737; GO:0005634; GO:0006986; GO:0043565; GO:0003700; GO:0006351		SUBCELLULAR LOCATION: Cytoplasm {ECO:0000256|PIRNR:PIRNR016571}. Nucleus {ECO:0000256|PIRNR:PIRNR016571}. Note=Present in the cytoplasm under non-stressed conditions and ER stress leads to its nuclear accumulation. {ECO:0000256|PIRNR:PIRNR016571}.
A0A0C5GCB1	VSX2	Predicted	GO:0003677; GO:0005634		SUBCELLULAR LOCATION: Nucleus {ECO:0000256|RuleBase:RU000682}.
A0A0D9SEK4	TBX6	Predicted	GO:0003677; GO:0005634; GO:0003700; GO:0006351		SUBCELLULAR LOCATION: Nucleus {ECO:0000256|SAAS:SAAS00353240}.
A0A0D9SEQ4	PLAGL1	Predicted	GO:0000977; GO:0046872; GO:0005634; GO:0006357; GO:0003700; GO:0006351		SUBCELLULAR LOCATION: Nucleus {ECO:0000256|SAAS:SAAS00535819}.
A0A0D9SET2	MEF2C	Evidence at protein level	GO:0003677; GO:0005634; GO:0006355; GO:0006351		SUBCELLULAR LOCATION: Nucleus {ECO:0000256|RuleBase:RU000476, ECO:0000256|SAAS:SAAS00579852}.
A0A0D9SEZ9	NA	Evidence at protein level	GO:0016282; GO:0033290; GO:0005852; GO:0001731; GO:0006446; GO:0003743		SUBCELLULAR LOCATION: Cytoplasm {ECO:0000256|HAMAP-Rule:MF_03005, ECO:0000256|SAAS:SAAS00003543}.
A0A0D9SFA3	CHD2	Evidence at protein level	GO:0001046; GO:0005634; GO:0006355		SUBCELLULAR LOCATION: Nucleus {ECO:0000256|SAAS:SAAS00539054}.
A0A0D9SFD0	MEF2C	Evidence at protein level	GO:0003677; GO:0005634; GO:0006355; GO:0006351		SUBCELLULAR LOCATION: Nucleus {ECO:0000256|RuleBase:RU000476, ECO:0000256|SAAS:SAAS00579852}.
A0A0D9SFI7	PLAGL1	Predicted	GO:0000977; GO:0046872; GO:0005634; GO:0006357; GO:0003700; GO:0006351		SUBCELLULAR LOCATION: Nucleus {ECO:0000256|SAAS:SAAS00535819}.
A0A0D9SFL9	NA	Evidence at protein level	GO:0005634; GO:0043565; GO:0043401; GO:0003700; GO:0006351; GO:0008270		SUBCELLULAR LOCATION: Nucleus {ECO:0000256|SAAS:SAAS00595767}.
A0A0D9SFM8	PLAGL1	Predicted	GO:0000977; GO:0046872; GO:0005634; GO:0006357; GO:0003700; GO:0006351		SUBCELLULAR LOCATION: Nucleus {ECO:0000256|SAAS:SAAS00535819}.
A0A0D9SFV8	CHD2	Evidence at protein level	GO:0001046; GO:0005634; GO:0006355		SUBCELLULAR LOCATION: Nucleus {ECO:0000256|SAAS:SAAS00539054}.
A0A0D9SG05	NANOGP8	Predicted	GO:0005634; GO:0006355; GO:0043565		SUBCELLULAR LOCATION: Nucleus {ECO:0000256|RuleBase:RU000682}.
A0A0D9SGB5	EIF3D	Evidence at protein level	GO:0005852; GO:0003743		SUBCELLULAR LOCATION: Cytoplasm {ECO:0000256|SAAS:SAAS00187789}.
A0A0D9SGF7	PLAGL1	Predicted	GO:0000977; GO:0046872; GO:0005634; GO:0006357; GO:0003700; GO:0006351		SUBCELLULAR LOCATION: Nucleus {ECO:0000256|SAAS:SAAS00535819}.
A0A0D9SGI5	MEF2C	Evidence at protein level	GO:0003677; GO:0005634; GO:0006355; GO:0006351		SUBCELLULAR LOCATION: Nucleus {ECO:0000256|RuleBase:RU000476, ECO:0000256|SAAS:SAAS00579852}.
A0A0D9SGK0	CHD2	Evidence at protein level	GO:0001046; GO:0005634; GO:0006355		SUBCELLULAR LOCATION: Nucleus {ECO:0000256|SAAS:SAAS00539527}.
A0A0F6T557	NA	Inferred from homology	GO:0005634; GO:0043565; GO:0003707; GO:0003700; GO:0006351; GO:0008270		SUBCELLULAR LOCATION: Nucleus {ECO:0000256|SAAS:SAAS00595767}.
A0A0G2JHI1	RXRB	Evidence at protein level	GO:0003677; GO:0005634; GO:0006355; GO:0003707; GO:0006351; GO:0008270		SUBCELLULAR LOCATION: Nucleus {ECO:0000256|SAAS:SAAS00595767}.
A0A0G2JIR1	EHMT2	Evidence at protein level	GO:0005694; GO:0018024; GO:0005634; GO:0008270		SUBCELLULAR LOCATION: Chromosome {ECO:0000256|SAAS:SAAS00563877}.; SUBCELLULAR LOCATION: Nucleus {ECO:0000256|RuleBase:RU004542, ECO:0000256|SAAS:SAAS00563921}.
A0A0G2JIS2	EHMT2	Evidence at protein level	GO:0005694; GO:0018024; GO:0005634; GO:0008270		SUBCELLULAR LOCATION: Chromosome {ECO:0000256|SAAS:SAAS00563877}.; SUBCELLULAR LOCATION: Nucleus {ECO:0000256|RuleBase:RU004542, ECO:0000256|SAAS:SAAS00563921}.
A0A0G2JJA7	PSMB9	Evidence at protein level	GO:0005737; GO:0005634; GO:0005839; GO:0051603; GO:0004298		SUBCELLULAR LOCATION: Cytoplasm {ECO:0000256|RuleBase:RU000694}. Nucleus {ECO:0000256|RuleBase:RU000694}.; SUBCELLULAR LOCATION: Nucleus {ECO:0000256|SAAS:SAAS00551005}.
A0A0G2JK64	EHMT2	Evidence at protein level	GO:0005694; GO:0018024; GO:0005634; GO:0008270		SUBCELLULAR LOCATION: Chromosome {ECO:0000256|SAAS:SAAS00563877}.; SUBCELLULAR LOCATION: Nucleus {ECO:0000256|RuleBase:RU004542, ECO:0000256|SAAS:SAAS00563921}.
A0A0G2JKR7	RXRB	Evidence at protein level	GO:0005634; GO:0043565; GO:0003707; GO:0003700; GO:0006351; GO:0008270		SUBCELLULAR LOCATION: Nucleus {ECO:0000256|SAAS:SAAS00595767}.
A0A0G2JMX7	MAPT	Evidence at protein level	GO:0005737; GO:0005874		SUBCELLULAR LOCATION: Cytoplasm, cytoskeleton {ECO:0000256|RuleBase:RU000686}.
A0A0G2JPD5	MAPT	Evidence at protein level	GO:0005737; GO:0005874		SUBCELLULAR LOCATION: Cytoplasm, cytoskeleton {ECO:0000256|RuleBase:RU000686}.
A0A0G2JPW5	TUBGCP5	Evidence at protein level	GO:0005737; GO:0005874; GO:0007020; GO:0005815; GO:0000922		SUBCELLULAR LOCATION: Cytoplasm, cytoskeleton, microtubule organizing center {ECO:0000256|RuleBase:RU363050}.
A0A0G2JQ02	PROP1	Predicted	GO:0005634; GO:0006355; GO:0043565		SUBCELLULAR LOCATION: Nucleus {ECO:0000256|RuleBase:RU000682, ECO:0000256|SAAS:SAAS00159552}.
A0A0G2JQI0	TUBGCP5	Evidence at protein level	GO:0005737; GO:0005874; GO:0007020; GO:0005815; GO:0000922		SUBCELLULAR LOCATION: Cytoplasm, cytoskeleton, microtubule organizing center {ECO:0000256|RuleBase:RU363050}.
A0A0G2JQJ7	MAPT	Evidence at protein level	GO:0005737; GO:0005874		SUBCELLULAR LOCATION: Cytoplasm, cytoskeleton {ECO:0000256|RuleBase:RU000686}.
A0A0G2JQK2	TUBGCP5	Evidence at protein level	GO:0005737; GO:0005874; GO:0007020; GO:0005815; GO:0000922		SUBCELLULAR LOCATION: Cytoplasm, cytoskeleton, microtubule organizing center {ECO:0000256|RuleBase:RU363050}.
A0A0G2JQX1	TUBGCP5	Evidence at protein level	GO:0005737; GO:0005874; GO:0007020; GO:0005815; GO:0000922		SUBCELLULAR LOCATION: Cytoplasm, cytoskeleton, microtubule organizing center {ECO:0000256|RuleBase:RU363050}.
A0A0G2JR45	TUBGCP5	Evidence at protein level	GO:0005737; GO:0005874; GO:0007020; GO:0005815; GO:0000922		SUBCELLULAR LOCATION: Cytoplasm, cytoskeleton, microtubule organizing center {ECO:0000256|RuleBase:RU363050}.
A0A0G2JRG1	TUBGCP5	Evidence at protein level	GO:0005737; GO:0005874; GO:0007020; GO:0005815; GO:0000922		SUBCELLULAR LOCATION: Cytoplasm, cytoskeleton, microtubule organizing center {ECO:0000256|RuleBase:RU363050}.
A0A0G2JRN8	EHMT2	Evidence at protein level	GO:0005694; GO:0018024; GO:0005634; GO:0008270		SUBCELLULAR LOCATION: Chromosome {ECO:0000256|SAAS:SAAS00563877}.; SUBCELLULAR LOCATION: Nucleus {ECO:0000256|RuleBase:RU004542, ECO:0000256|SAAS:SAAS00563921}.
A0A0G2JRR0	EHMT2	Evidence at protein level	GO:0005694; GO:0018024; GO:0005634; GO:0008270		SUBCELLULAR LOCATION: Chromosome {ECO:0000256|SAAS:SAAS00563877}.; SUBCELLULAR LOCATION: Nucleus {ECO:0000256|RuleBase:RU004542, ECO:0000256|SAAS:SAAS00563921}.
A0A0G2JS51	TUBGCP5	Evidence at protein level	GO:0005737; GO:0005874; GO:0007020; GO:0005815; GO:0000922		SUBCELLULAR LOCATION: Cytoplasm, cytoskeleton, microtubule organizing center {ECO:0000256|RuleBase:RU363050}.
A0A0G2JS76	MAPT	Evidence at protein level	GO:0005737; GO:0005874		SUBCELLULAR LOCATION: Cytoplasm, cytoskeleton {ECO:0000256|RuleBase:RU000686}.
A0A0G2JSA7	TUBGCP5	Evidence at protein level	GO:0005737; GO:0005874; GO:0007020; GO:0005815; GO:0000922		SUBCELLULAR LOCATION: Cytoplasm, cytoskeleton, microtubule organizing center {ECO:0000256|RuleBase:RU363050}.
A0A0H3W5K0	OTX2	Predicted	GO:0003677; GO:0005634		SUBCELLULAR LOCATION: Nucleus {ECO:0000256|RuleBase:RU000682}.
A0A0J9YVN9	OVOL3	Predicted	GO:0000981; GO:0046872; GO:0003676; GO:0005634; GO:0006366		SUBCELLULAR LOCATION: Nucleus {ECO:0000256|SAAS:SAAS00535819}.
A0A0J9YVP1	PGR	Evidence at protein level	GO:0005634; GO:0043565; GO:0005496; GO:0003707; GO:0003700; GO:0006351; GO:0008270		SUBCELLULAR LOCATION: Nucleus {ECO:0000256|SAAS:SAAS00586772}.
A0A0J9YW13	RBM8A	Evidence at protein level	GO:0003723; GO:0008380; GO:0005737; GO:0006397; GO:0051028; GO:0016607; GO:0000166		SUBCELLULAR LOCATION: Nucleus {ECO:0000256|RuleBase:RU361239}. Nucleus speckle {ECO:0000256|RuleBase:RU361239}. Cytoplasm {ECO:0000256|RuleBase:RU361239}.
A0A0J9YX56	TUBGCP3	Evidence at protein level	GO:0005737; GO:0005874; GO:0007020; GO:0005815; GO:0000922		SUBCELLULAR LOCATION: Cytoplasm, cytoskeleton, microtubule organizing center {ECO:0000256|RuleBase:RU363050}.
A0A0J9YX63	TUBGCP3	Evidence at protein level	GO:0005737; GO:0005874; GO:0007020; GO:0005815; GO:0000922		SUBCELLULAR LOCATION: Cytoplasm, cytoskeleton, microtubule organizing center {ECO:0000256|RuleBase:RU363050}.
A0A0K0K1K4	HEL-S-276	Evidence at transcript level	GO:0005737; GO:0005634; GO:0019773; GO:0004298; GO:0006511		SUBCELLULAR LOCATION: Cytoplasm {ECO:0000256|RuleBase:RU000551}. Nucleus {ECO:0000256|RuleBase:RU000551}.; SUBCELLULAR LOCATION: Nucleus {ECO:0000256|SAAS:SAAS00594407}.
A0A0M3HER7	NA	Predicted	GO:0005634; GO:0043565; GO:0003700; GO:0006351		SUBCELLULAR LOCATION: Nucleus {ECO:0000256|SAAS:SAAS00582275}.
A0A0M3L9V7	CDX2	Evidence at transcript level	GO:0005634; GO:0006355; GO:0043565		SUBCELLULAR LOCATION: Nucleus {ECO:0000256|RuleBase:RU000682, ECO:0000256|SAAS:SAAS00544279}.
A0A0M4B4Y9	TP53	Inferred from homology	GO:0006915; GO:0007049; GO:0005737; GO:0046872; GO:0005634; GO:0003700; GO:0044212; GO:0006351		SUBCELLULAR LOCATION: Cytoplasm {ECO:0000256|RuleBase:RU003304}. Nucleus {ECO:0000256|RuleBase:RU003304}.
A0A0P0GE07	POU2F1	Evidence at transcript level	GO:0005634; GO:0043565; GO:0003700; GO:0006351		SUBCELLULAR LOCATION: Nucleus {ECO:0000256|RuleBase:RU361194, ECO:0000256|SAAS:SAAS00553137}.
A0A0R4J2E8	MATR3	Evidence at protein level	GO:0003676; GO:0000166; GO:0005634; GO:0008270		SUBCELLULAR LOCATION: Nucleus {ECO:0000256|SAAS:SAAS00591741}.
A0A0R4J2G5	MEF2C	Evidence at protein level	GO:0003677; GO:0005634; GO:0006355; GO:0006351		SUBCELLULAR LOCATION: Nucleus {ECO:0000256|RuleBase:RU000476, ECO:0000256|SAAS:SAAS00579852}.
A0A0R5RI31	THRA	Inferred from homology	GO:0005634; GO:0006355; GO:0043401; GO:0006351		SUBCELLULAR LOCATION: Nucleus {ECO:0000256|SAAS:SAAS00595767}.
A0A0R5RI36	THRA	Inferred from homology	GO:0005634; GO:0006355; GO:0043401; GO:0006351		SUBCELLULAR LOCATION: Nucleus {ECO:0000256|SAAS:SAAS00595767}.
A0A0R5RI44	THRA	Inferred from homology	GO:0005634; GO:0006355; GO:0043401; GO:0006351		SUBCELLULAR LOCATION: Nucleus {ECO:0000256|SAAS:SAAS00595767}.
A0A0R5RI47	THRA	Inferred from homology	GO:0005634; GO:0006355; GO:0043401; GO:0006351		SUBCELLULAR LOCATION: Nucleus {ECO:0000256|SAAS:SAAS00595767}.
A0A0R5RI63	THRA	Inferred from homology	GO:0005634; GO:0006355; GO:0043401; GO:0006351		SUBCELLULAR LOCATION: Nucleus {ECO:0000256|SAAS:SAAS00595767}.
A0A0R5RI99	THRB	Inferred from homology	GO:0003677; GO:0005634; GO:0003707; GO:0004887; GO:0006351		SUBCELLULAR LOCATION: Nucleus {ECO:0000256|SAAS:SAAS00595767}.
A0A0R5RIB5	THRB	Inferred from homology	GO:0003677; GO:0005634; GO:0003707; GO:0004887; GO:0006351		SUBCELLULAR LOCATION: Nucleus {ECO:0000256|SAAS:SAAS00595767}.
A0A0S2Z383	NKX2-5	Evidence at transcript level	GO:0005634; GO:0006355; GO:0043565		SUBCELLULAR LOCATION: Nucleus {ECO:0000256|RuleBase:RU000682, ECO:0000256|SAAS:SAAS00544279}.
A0A0S2Z3C9	ETV6	Evidence at transcript level	GO:0005634; GO:0043565; GO:0003700		SUBCELLULAR LOCATION: Nucleus {ECO:0000256|SAAS:SAAS00594387}.
A0A0S2Z3K8	E2F6	Evidence at transcript level	GO:0003677; GO:0005634; GO:0003700; GO:0005667; GO:0006351		SUBCELLULAR LOCATION: Nucleus {ECO:0000256|RuleBase:RU003796}.
A0A0S2Z3Q5	EGR2	Evidence at transcript level	GO:0003677; GO:0046872; GO:0005634; GO:0006355; GO:0006351		SUBCELLULAR LOCATION: Nucleus {ECO:0000256|RuleBase:RU363046}.
A0A0S2Z3W7	ITPA	Evidence at transcript level	GO:0005737; GO:0046872; GO:0009143; GO:0047429; GO:0000166; GO:0009117		SUBCELLULAR LOCATION: Cytoplasm {ECO:0000256|SAAS:SAAS00338608}.
A0A0S2Z417	MEF2A	Evidence at transcript level	GO:0003677; GO:0005634; GO:0006355; GO:0006351		SUBCELLULAR LOCATION: Nucleus {ECO:0000256|RuleBase:RU000476, ECO:0000256|SAAS:SAAS00579852}.
A0A0S2Z418	NR4A2	Evidence at transcript level	GO:0004879; GO:0005634; GO:0043565; GO:0003707; GO:0006351; GO:0008270		SUBCELLULAR LOCATION: Nucleus {ECO:0000256|SAAS:SAAS00595767}.
A0A0S2Z423	ITPA	Evidence at transcript level	GO:0005737; GO:0046872; GO:0009143; GO:0047429; GO:0000166; GO:0009117		SUBCELLULAR LOCATION: Cytoplasm {ECO:0000256|SAAS:SAAS00338608}.
A0A0S2Z439	LMX1B	Evidence at transcript level	GO:0005634; GO:0006355; GO:0043565; GO:0008270		SUBCELLULAR LOCATION: Nucleus {ECO:0000256|RuleBase:RU000682, ECO:0000256|SAAS:SAAS00397436}.
A0A0S2Z453	MEF2A	Evidence at transcript level	GO:0003677; GO:0005634; GO:0006355; GO:0006351		SUBCELLULAR LOCATION: Nucleus {ECO:0000256|RuleBase:RU000476, ECO:0000256|SAAS:SAAS00579852}.
A0A0S2Z454	MEF2A	Evidence at transcript level	GO:0003677; GO:0005634; GO:0006355; GO:0006351		SUBCELLULAR LOCATION: Nucleus {ECO:0000256|RuleBase:RU000476, ECO:0000256|SAAS:SAAS00579852}.
A0A0S2Z492	MCM3	Evidence at transcript level	GO:0005524; GO:0003677; GO:0003678; GO:0006270; GO:0042555; GO:0005634		SUBCELLULAR LOCATION: Nucleus {ECO:0000256|SAAS:SAAS00534438}.
A0A0S2Z4A5	MCM7	Evidence at transcript level	GO:0005524; GO:0003677; GO:0003678; GO:0006270; GO:0042555; GO:0005634		SUBCELLULAR LOCATION: Nucleus {ECO:0000256|SAAS:SAAS00534438}.
A0A0S2Z4B2	SMAD4	Evidence at transcript level	GO:0003677; GO:0005737; GO:0005634; GO:0003700; GO:0005667; GO:0006351; GO:0007179		SUBCELLULAR LOCATION: Cytoplasm {ECO:0000256|RuleBase:RU361195}. Nucleus {ECO:0000256|RuleBase:RU361195}.; SUBCELLULAR LOCATION: Nucleus {ECO:0000256|SAAS:SAAS00573677}.
A0A0S2Z4G1	TADA2A	Evidence at transcript level	GO:0003677; GO:0016573; GO:0005634; GO:0006357		SUBCELLULAR LOCATION: Nucleus {ECO:0000256|SAAS:SAAS00548613}.
A0A0S2Z4H3	NFIB	Evidence at transcript level	GO:0006260; GO:0005634; GO:0003700; GO:0006351		SUBCELLULAR LOCATION: Nucleus {ECO:0000256|SAAS:SAAS00573677}.
A0A0S2Z4J6	PMM2	Evidence at transcript level	GO:0009298; GO:0005737; GO:0004615		SUBCELLULAR LOCATION: Cytoplasm {ECO:0000256|RuleBase:RU361118}.
A0A0S2Z4K4	ZNF213	Evidence at transcript level	GO:0046872; GO:0003676; GO:0005634; GO:0003700		SUBCELLULAR LOCATION: Nucleus {ECO:0000256|SAAS:SAAS00574784}.
A0A0S2Z4K5	PPARG	Evidence at transcript level	GO:0004879; GO:0005634; GO:0043565; GO:0043401; GO:0006351; GO:0008270		SUBCELLULAR LOCATION: Nucleus {ECO:0000256|SAAS:SAAS00595767}.
A0A0S2Z4L1	LMX1B	Evidence at transcript level	GO:0005634; GO:0006355; GO:0043565; GO:0008270		SUBCELLULAR LOCATION: Nucleus {ECO:0000256|RuleBase:RU000682, ECO:0000256|SAAS:SAAS00397436}.
A0A0S2Z4L6	ZNF213	Evidence at transcript level	GO:0046872; GO:0003676; GO:0005634; GO:0003700		SUBCELLULAR LOCATION: Nucleus {ECO:0000256|SAAS:SAAS00574784}.
A0A0S2Z4M5	RXRB	Evidence at transcript level	GO:0005634; GO:0043565; GO:0003707; GO:0003700; GO:0006351; GO:0008270		SUBCELLULAR LOCATION: Nucleus {ECO:0000256|SAAS:SAAS00595767}.
A0A0S2Z4N0	MEF2A	Evidence at transcript level	GO:0003677; GO:0005634; GO:0006355; GO:0006351		SUBCELLULAR LOCATION: Nucleus {ECO:0000256|RuleBase:RU000476, ECO:0000256|SAAS:SAAS00579852}.
A0A0S2Z4P2	PAX8	Evidence at transcript level	GO:0003677; GO:0007275; GO:0005634; GO:0006355; GO:0006351		SUBCELLULAR LOCATION: Nucleus {ECO:0000256|RuleBase:RU000491, ECO:0000256|SAAS:SAAS00117811}.
A0A0S2Z4Q9	CBX4	Evidence at transcript level	GO:0005634		SUBCELLULAR LOCATION: Nucleus {ECO:0000256|SAAS:SAAS00539054}.
A0A0S2Z4R5	TADA2A	Evidence at transcript level	GO:0003677; GO:0016573; GO:0005634; GO:0006357		SUBCELLULAR LOCATION: Nucleus {ECO:0000256|SAAS:SAAS00548613}.
A0A0S2Z4T1	MCM3	Evidence at transcript level	GO:0005524; GO:0003677; GO:0003678; GO:0006270; GO:0042555; GO:0005634		SUBCELLULAR LOCATION: Nucleus {ECO:0000256|SAAS:SAAS00534438}.
A0A0S2Z570	RXRB	Evidence at transcript level	GO:0005634; GO:0043565; GO:0003707; GO:0003700; GO:0006351; GO:0008270		SUBCELLULAR LOCATION: Nucleus {ECO:0000256|SAAS:SAAS00595767}.
A0A0S2Z5B2	CBX4	Evidence at transcript level	GO:0005634		SUBCELLULAR LOCATION: Nucleus {ECO:0000256|SAAS:SAAS00539054}.
A0A0S2Z5C9	FTSJ1	Evidence at transcript level	GO:0005737; GO:0002181; GO:0008175; GO:0002128		SUBCELLULAR LOCATION: Cytoplasm {ECO:0000256|HAMAP-Rule:MF_03162}.
A0A0S2Z5L0	GINS3	Evidence at transcript level	GO:0006260; GO:0005634		SUBCELLULAR LOCATION: Nucleus {ECO:0000256|SAAS:SAAS00542169}.
A0A0S2Z5P2	GINS3	Evidence at transcript level	GO:0006260; GO:0005634		SUBCELLULAR LOCATION: Nucleus {ECO:0000256|SAAS:SAAS00542169}.
A0A0S2Z5S4	LHX4	Evidence at transcript level	GO:0005634; GO:0006355; GO:0043565; GO:0008270		SUBCELLULAR LOCATION: Nucleus {ECO:0000256|RuleBase:RU000682, ECO:0000256|SAAS:SAAS00397436}.
A0A0S2Z658	ZKSCAN4	Evidence at transcript level	GO:0046872; GO:0003676; GO:0005634; GO:0003700		SUBCELLULAR LOCATION: Nucleus {ECO:0000256|SAAS:SAAS00574784}.
A0A0U1RQC9	TP53	Evidence at protein level	GO:0006915; GO:0007049; GO:0005737; GO:0016021; GO:0046872; GO:0005634; GO:0051262; GO:0003700; GO:0044212; GO:0006351		SUBCELLULAR LOCATION: Cytoplasm {ECO:0000256|RuleBase:RU003304}. Nucleus {ECO:0000256|RuleBase:RU003304}.	TRANSMEM 373 392 Helical. {ECO:0000256|SAM:Phobius}.
A0A0U1RQM2	FOXP2	Evidence at protein level	GO:0005634; GO:0043565; GO:0003700; GO:0006351		SUBCELLULAR LOCATION: Nucleus {ECO:0000256|SAAS:SAAS00582275}.
A0A0U1RQR2	CIZ1	Evidence at protein level	GO:0003676; GO:0005634; GO:0008270		SUBCELLULAR LOCATION: Nucleus {ECO:0000256|SAAS:SAAS00591741}.
A0A0U1RQR8	FOXP2	Evidence at protein level	GO:0005634; GO:0043565; GO:0003700; GO:0006351		SUBCELLULAR LOCATION: Nucleus {ECO:0000256|SAAS:SAAS00582275}.
A0A0U1RQY3	FOXP2	Evidence at protein level	GO:0005634; GO:0043565; GO:0003700; GO:0006351		SUBCELLULAR LOCATION: Nucleus {ECO:0000256|SAAS:SAAS00582275}.
A0A0U1RR32	hCG_2039566	Inferred from homology	GO:0003677; GO:0000786; GO:0005634		SUBCELLULAR LOCATION: Chromosome {ECO:0000256|SAAS:SAAS00534031}.; SUBCELLULAR LOCATION: Nucleus {ECO:0000256|RuleBase:RU000527, ECO:0000256|SAAS:SAAS00534029}.
A0A0U1RRH7	NA	Inferred from homology	GO:0003677; GO:0000786; GO:0005634		SUBCELLULAR LOCATION: Chromosome {ECO:0000256|SAAS:SAAS00534031}.; SUBCELLULAR LOCATION: Nucleus {ECO:0000256|RuleBase:RU000527, ECO:0000256|SAAS:SAAS00534029}.
A0A0U1RRL5	ELF1	Evidence at protein level	GO:0005634; GO:0043565; GO:0003700		SUBCELLULAR LOCATION: Nucleus {ECO:0000256|SAAS:SAAS00594387}.
A0A109NGN6	NA	Evidence at transcript level	GO:0005737; GO:0005634; GO:0019773; GO:0004298; GO:0006511		SUBCELLULAR LOCATION: Cytoplasm {ECO:0000256|RuleBase:RU000551}. Nucleus {ECO:0000256|RuleBase:RU000551}.; SUBCELLULAR LOCATION: Nucleus {ECO:0000256|SAAS:SAAS00594407}.
A0A125SXV6	ESR1	Evidence at transcript level	GO:0030284; GO:0005634; GO:0043565; GO:0005496; GO:0003700; GO:0006351; GO:0008270		SUBCELLULAR LOCATION: Nucleus {ECO:0000256|SAAS:SAAS00595767}.
A0A125SXV7	ESR1	Evidence at transcript level	GO:0030284; GO:0005634; GO:0043565; GO:0005496; GO:0003700; GO:0006351; GO:0008270		SUBCELLULAR LOCATION: Nucleus {ECO:0000256|SAAS:SAAS00595767}.
A0A125SXV8	ESR1	Evidence at transcript level	GO:0030284; GO:0005634; GO:0043565; GO:0005496; GO:0003700; GO:0006351; GO:0008270		SUBCELLULAR LOCATION: Nucleus {ECO:0000256|SAAS:SAAS00595767}.
A0A125SXV9	ESR1	Evidence at transcript level	GO:0030284; GO:0005634; GO:0043565; GO:0005496; GO:0003700; GO:0006351; GO:0008270		SUBCELLULAR LOCATION: Nucleus {ECO:0000256|SAAS:SAAS00595767}.
A0A125SXW0	ESR1	Evidence at transcript level	GO:0030284; GO:0005634; GO:0043565; GO:0005496; GO:0003700; GO:0006351; GO:0008270		SUBCELLULAR LOCATION: Nucleus {ECO:0000256|SAAS:SAAS00595767}.
A0A125SXW1	ESR1	Evidence at transcript level	GO:0030284; GO:0005634; GO:0043565; GO:0005496; GO:0003700; GO:0006351; GO:0008270		SUBCELLULAR LOCATION: Nucleus {ECO:0000256|SAAS:SAAS00595767}.
A0A125SXW2	ESR1	Evidence at transcript level	GO:0030284; GO:0005634; GO:0043565; GO:0005496; GO:0003700; GO:0006351; GO:0008270		SUBCELLULAR LOCATION: Nucleus {ECO:0000256|SAAS:SAAS00595767}.
A0A125SXW3	ESR1	Evidence at transcript level	GO:0030284; GO:0005634; GO:0043565; GO:0005496; GO:0003700; GO:0006351; GO:0008270		SUBCELLULAR LOCATION: Nucleus {ECO:0000256|SAAS:SAAS00595767}.
A0AV96	RBM47	Evidence at protein level	GO:0016554; GO:0002244; GO:0000166; GO:0005634; GO:0044822		SUBCELLULAR LOCATION: Nucleus {ECO:0000250}.
A0AVK6	E2F8	Evidence at protein level	GO:0000978; GO:0033301; GO:0008283; GO:0060718; GO:0001047; GO:0070365; GO:0032466; GO:0000122; GO:0005634; GO:0001890; GO:0032877; GO:0045944; GO:0002040; GO:0003714; GO:0003700; GO:0005667; GO:0006351; GO:0001078; GO:0060707		SUBCELLULAR LOCATION: Nucleus {ECO:0000269|PubMed:15897886}.
A0JLS9	ZEB1	Evidence at transcript level	GO:0003677; GO:0046872; GO:0005634		SUBCELLULAR LOCATION: Nucleus {ECO:0000256|RuleBase:RU000682}.
A0JLT2	MED19	Evidence at protein level	GO:0001104; GO:0016592; GO:0005634; GO:0045944; GO:0008134; GO:0006351		SUBCELLULAR LOCATION: Nucleus {ECO:0000305}.
A0MNN5	NA	Evidence at transcript level	GO:0005737; GO:0005730; GO:0005634		SUBCELLULAR LOCATION: Nucleus {ECO:0000256|SAAS:SAAS00542127}.
A0MZ66	SHTN1	Evidence at protein level	GO:0032488; GO:0007265; GO:0051015; GO:0061573; GO:0030424; GO:0044295; GO:0007409; GO:0031252; GO:0060327; GO:0061163; GO:0030175; GO:0030426; GO:0030027; GO:0005874; GO:0005875; GO:0015630; GO:0038007; GO:0048812; GO:0043204; GO:0048471; GO:0045773; GO:2001224; GO:2000114; GO:0006930		SUBCELLULAR LOCATION: Perikaryon {ECO:0000250|UniProtKB:Q8K2Q9}. Cell projection, axon {ECO:0000250|UniProtKB:Q8K2Q9}. Cell projection, growth cone {ECO:0000250|UniProtKB:Q8K2Q9}. Cytoplasm, cytoskeleton {ECO:0000250|UniProtKB:Q8K2Q9}. Cell projection, filopodium {ECO:0000250|UniProtKB:A0MZ67}. Cell projection, lamellipodium {ECO:0000250|UniProtKB:A0MZ67}. Note=Localizes in multiple growth cones …
A0PJ83	REST	Evidence at transcript level	GO:0000981; GO:0046872; GO:0045665; GO:0003676; GO:0005634; GO:0043065; GO:0006351		SUBCELLULAR LOCATION: Nucleus {ECO:0000256|SAAS:SAAS00535819}.
A0PJD3	C14orf43	Evidence at transcript level	GO:0003677; GO:0005634		SUBCELLULAR LOCATION: Nucleus {ECO:0000256|SAAS:SAAS00548613}.
A0PJF9	NPAS2	Evidence at transcript level	GO:0005737; GO:0005634; GO:0003700; GO:0005667; GO:0006351		SUBCELLULAR LOCATION: Nucleus {ECO:0000256|SAAS:SAAS00600858}.
A0PJY2	FEZF1	Evidence at protein level	GO:0000978; GO:0007411; GO:0021797; GO:0046872; GO:0008285; GO:0045892; GO:0001764; GO:0005634; GO:0021772; GO:0045666; GO:0045893; GO:0006351; GO:0001227		SUBCELLULAR LOCATION: Nucleus {ECO:0000269|PubMed:19318583}.
A0PK00	TMEM120B	Evidence at protein level	GO:0045444; GO:0016021; GO:0005637; GO:0051291		SUBCELLULAR LOCATION: Nucleus inner membrane {ECO:0000250|UniProtKB:Q3TA38}; Multi-pass membrane protein {ECO:0000255}.	TRANSMEM 102 124 Helical. {ECO:0000255}.; TRANSMEM 132 152 Helical. {ECO:0000255}.; TRANSMEM 159 179 Helical. {ECO:0000255}.; TRANSMEM 187 207 Helical. {ECO:0000255}.; TRANSMEM 270 290 Helical. {ECO:0000255}.; TRANSMEM 302 322 Helical. {ECO:0000255}.
A1A4F3	SEPSECS	Evidence at transcript level	GO:0005737; GO:0097056; GO:0000049; GO:0016785; GO:0006412		SUBCELLULAR LOCATION: Cytoplasm {ECO:0000256|PIRNR:PIRNR017689}.
A1A4S6	ARHGAP10	Evidence at protein level	GO:0005096; GO:0007010; GO:0005829; GO:0043066; GO:0048471; GO:0005886; GO:0051056; GO:0007165		SUBCELLULAR LOCATION: Cytoplasm {ECO:0000250}. Cytoplasm, perinuclear region {ECO:0000250}. Cell membrane {ECO:0000250}. Note=Association to cell membrane is dependent on PH domain. {ECO:0000250}.
A1A519	FAM170A	Evidence at transcript level	GO:0003677; GO:0046872; GO:0005634; GO:0045893; GO:0006366		SUBCELLULAR LOCATION: Nucleus {ECO:0000269|PubMed:20162441}.
A1ECB1	NKX2-5	Predicted	GO:0005634; GO:0006355; GO:0043565		SUBCELLULAR LOCATION: Nucleus {ECO:0000256|RuleBase:RU000682, ECO:0000256|SAAS:SAAS00544279}.
A1ECB2	NKX2-5	Predicted	GO:0005634; GO:0006355; GO:0043565		SUBCELLULAR LOCATION: Nucleus {ECO:0000256|RuleBase:RU000682, ECO:0000256|SAAS:SAAS00544279}.
A1ECB6	NKX2-5	Predicted	GO:0005634; GO:0006355; GO:0043565		SUBCELLULAR LOCATION: Nucleus {ECO:0000256|RuleBase:RU000682, ECO:0000256|SAAS:SAAS00544279}.
A1ECB7	NKX2-5	Predicted	GO:0005634; GO:0006355; GO:0043565		SUBCELLULAR LOCATION: Nucleus {ECO:0000256|RuleBase:RU000682, ECO:0000256|SAAS:SAAS00544279}.
A1ECB8	NKX2-5	Predicted	GO:0005634; GO:0006355; GO:0043565		SUBCELLULAR LOCATION: Nucleus {ECO:0000256|RuleBase:RU000682, ECO:0000256|SAAS:SAAS00544279}.
A1ECD1	NKX2-5	Predicted	GO:0005634; GO:0006355; GO:0043565		SUBCELLULAR LOCATION: Nucleus {ECO:0000256|RuleBase:RU000682, ECO:0000256|SAAS:SAAS00544279}.
A1KXE4	FAM168B	Evidence at protein level	GO:0030424; GO:0070062; GO:0016021; GO:0048471; GO:0005886		SUBCELLULAR LOCATION: Cytoplasm, perinuclear region {ECO:0000250}. Cell membrane {ECO:0000250}; Multi-pass membrane protein {ECO:0000250}. Cell projection, axon {ECO:0000250}. Note=Expressed in neuronal cell bodies and axonal fibers. {ECO:0000250}.	TRANSMEM 19 42 Helical. {ECO:0000255}.; TRANSMEM 143 164 Helical. {ECO:0000255}.
A1KYQ7	EIF3C	Evidence at transcript level	GO:0016282; GO:0033290; GO:0005852; GO:0001731; GO:0006446; GO:0003743		SUBCELLULAR LOCATION: Cytoplasm {ECO:0000256|HAMAP-Rule:MF_03002, ECO:0000256|SAAS:SAAS00535949}.
A1L020	MEX3A	Evidence at protein level	GO:0000932; GO:0005634; GO:0044822; GO:0008270		SUBCELLULAR LOCATION: Cytoplasm {ECO:0000269|PubMed:17267406}. Nucleus {ECO:0000269|PubMed:17267406}. Cytoplasm, P-body {ECO:0000269|PubMed:17267406}. Note=Predominantly expressed in the cytoplasm and shuttles between the cytoplasm and the nucleus through the CRM1 export pathway.
A1L0T6	HOXA4	Evidence at transcript level	GO:0005634; GO:0006355; GO:0043565		SUBCELLULAR LOCATION: Nucleus {ECO:0000256|RuleBase:RU000682, ECO:0000256|SAAS:SAAS00544279}.
A1L167	UBE2QL1	Evidence at protein level	GO:0005524; GO:0005634; GO:0061631		SUBCELLULAR LOCATION: Nucleus {ECO:0000269|PubMed:24000165}.
A1L190	SYCE3	Evidence at protein level	GO:0051301; GO:0000801; GO:0005694; GO:0005634; GO:0043065; GO:0007131; GO:0007283; GO:0007130		SUBCELLULAR LOCATION: Nucleus {ECO:0000250|UniProtKB:B5KM66}. Chromosome {ECO:0000250|UniProtKB:B5KM66}. Note=Colocalizes with SYCE1 in the central elements. {ECO:0000250|UniProtKB:B5KM66}.
A1L407	HIST1H1T	Evidence at transcript level	GO:0003677; GO:0000786; GO:0006334; GO:0005634		SUBCELLULAR LOCATION: Chromosome {ECO:0000256|SAAS:SAAS00569684}.; SUBCELLULAR LOCATION: Nucleus {ECO:0000256|RuleBase:RU003895, ECO:0000256|SAAS:SAAS00569685}.
A1L461	REV1	Evidence at transcript level	GO:0006281; GO:0003684; GO:0042276; GO:0016779; GO:0005634		SUBCELLULAR LOCATION: Nucleus {ECO:0000256|PIRNR:PIRNR036573}.
A1L473	CDY2B	Evidence at transcript level	GO:0003824; GO:0008152; GO:0005634		SUBCELLULAR LOCATION: Nucleus {ECO:0000256|SAAS:SAAS00539527}.
A1X283	SH3PXD2B	Evidence at protein level	GO:0042169; GO:0060612; GO:0060348; GO:0030154; GO:0030054; GO:0042995; GO:0005737; GO:0022617; GO:0001654; GO:0007507; GO:0055114; GO:0080025; GO:0032266; GO:0070273; GO:0010314; GO:0002102; GO:0071800; GO:0045600; GO:0072657; GO:0001501; GO:0006801; GO:0016176		SUBCELLULAR LOCATION: Cytoplasm {ECO:0000250}. Cell projection, podosome {ECO:0000250}. Note=Cytoplasmic in normal cells and localizes to podosomes in SRC-transformed cells. {ECO:0000250}.
A1YLA1	PLAGL1	Evidence at transcript level	GO:0000977; GO:0046872; GO:0005634; GO:0006357; GO:0003700; GO:0006351		SUBCELLULAR LOCATION: Nucleus {ECO:0000256|SAAS:SAAS00535819}.
A1Z1Q3	MACROD2	Evidence at protein level	GO:0007420; GO:0006974; GO:0019213; GO:0016798; GO:0005634; GO:0051725; GO:0042278		SUBCELLULAR LOCATION: Nucleus. Note=Recruited to DNA lesions, probably via mono-APD-ribosylated proteins.
A2A288	ZC3H12D	Evidence at protein level	GO:0061158; GO:0005737; GO:0000932; GO:0004519; GO:0046872; GO:2000134; GO:0030308; GO:0005634		SUBCELLULAR LOCATION: Cytoplasm, P-body {ECO:0000269|PubMed:26134560}. Note=Colocalizes with ZC3H12A in GW bodies (GWBs) (PubMed:26134560). {ECO:0000269|PubMed:26134560}.; SUBCELLULAR LOCATION: Isoform 1: Cytoplasm. Note=Localized as discrete granules. Colocalized with mRNA-processing body markers, AGO2 and DCP1A, but not with a stress granule maker, TIA1, in the cytoplasm.; SUBCELLULAR LOCATION:…
A2A3N6	PIPSL	Uncertain	GO:0005737; GO:0016307		SUBCELLULAR LOCATION: Cytoplasm {ECO:0000269|PubMed:17623810}.
A2ABF8	EHMT2	Evidence at protein level	GO:0010424; GO:0000977; GO:0035690; GO:0005694; GO:0009566; GO:0046976; GO:0046974; GO:0007616; GO:1902902; GO:0000122; GO:0005654; GO:0035265; GO:0044030; GO:0006275; GO:0051569; GO:0051570; GO:0045471; GO:0060992; GO:0031667; GO:0007286; GO:0007130; GO:0008270		SUBCELLULAR LOCATION: Chromosome {ECO:0000256|SAAS:SAAS00563877}.; SUBCELLULAR LOCATION: Nucleus {ECO:0000256|RuleBase:RU004542, ECO:0000256|SAAS:SAAS00563921}.
A2ABF9	EHMT2	Evidence at protein level	GO:0005694; GO:0018024; GO:0005654; GO:0008270		SUBCELLULAR LOCATION: Chromosome {ECO:0000256|SAAS:SAAS00563877}.; SUBCELLULAR LOCATION: Nucleus {ECO:0000256|RuleBase:RU004542, ECO:0000256|SAAS:SAAS00563921}.
A2ACR1	PSMB9	Evidence at protein level	GO:0005737; GO:0005634; GO:0005839; GO:0051603; GO:0004298		SUBCELLULAR LOCATION: Cytoplasm {ECO:0000256|RuleBase:RU000694}. Nucleus {ECO:0000256|RuleBase:RU000694}.; SUBCELLULAR LOCATION: Nucleus {ECO:0000256|SAAS:SAAS00551005}.
A2I2P5	NPAS2	Predicted	GO:0003677; GO:0005737; GO:0005634; GO:0003700; GO:0005667; GO:0006351		SUBCELLULAR LOCATION: Nucleus {ECO:0000256|SAAS:SAAS00600858}.
A2IDD5	CCDC78	Evidence at transcript level	GO:0030030; GO:0005814; GO:0098535; GO:0098536; GO:0048471; GO:0042383; GO:0016529; GO:0003009		SUBCELLULAR LOCATION: Cytoplasm, cytoskeleton, microtubule organizing center, centrosome, centriole. Cytoplasm, perinuclear region. Cell membrane, sarcolemma. Sarcoplasmic reticulum. Note=Localizes to centrioles and deuterosome. Found primarily in the perinuclear region as well as along the sarcolemmal membrane and in reticular pattern within the sarcoplasm.
A2NIV0	NA	Evidence at transcript level	GO:0005634; GO:0043565; GO:0003700		SUBCELLULAR LOCATION: Nucleus {ECO:0000256|SAAS:SAAS00594387}.
A2RRD8	ZNF320	Evidence at protein level	GO:0003677; GO:0046872; GO:0005634; GO:0006355; GO:0003700; GO:0006351		SUBCELLULAR LOCATION: Nucleus {ECO:0000305}.
A2RRP1	NBAS	Evidence at protein level	GO:0070939; GO:0000149; GO:0005829; GO:0005783; GO:0005789; GO:0016020; GO:2000623; GO:0000956; GO:0015031; GO:0006890		SUBCELLULAR LOCATION: Cytoplasm {ECO:0000269|PubMed:20577004}. Endoplasmic reticulum {ECO:0000269|PubMed:19369418}. Endoplasmic reticulum membrane; Peripheral membrane protein {ECO:0000305}.
A2RTX5	TARSL2	Evidence at protein level	GO:0005524; GO:0003723; GO:0005737; GO:0004829; GO:0006435		SUBCELLULAR LOCATION: Cytoplasm {ECO:0000250}.
A2RU30	TESPA1	Evidence at protein level	GO:0008180; GO:0010387; GO:0005737; GO:0005789; GO:0033089; GO:0050862		SUBCELLULAR LOCATION: Cytoplasm {ECO:0000269|PubMed:22561606, ECO:0000269|PubMed:23501103}. Endoplasmic reticulum membrane {ECO:0000269|PubMed:23501103}. Note=May localize to mitochondria-associated endoplasmic reticulum membrane (MAM). {ECO:0000269|PubMed:23501103}.
A2RU49	HYKK	Evidence at protein level	GO:0047992; GO:0006554; GO:0005759		SUBCELLULAR LOCATION: Cytoplasm {ECO:0000305}.
A2RU54	HMX2	Evidence at transcript level	GO:0007420; GO:0030154; GO:0042472; GO:0005634; GO:0008284; GO:0048026; GO:0006355; GO:0043565; GO:0006351		SUBCELLULAR LOCATION: Nucleus {ECO:0000255|PROSITE-ProRule:PRU00108}.
A2RUA4	NA	Evidence at transcript level	GO:0003677; GO:0000786; GO:0005634		SUBCELLULAR LOCATION: Nucleus {ECO:0000256|RuleBase:RU000527}.
A2RUB1	MEIOC	Evidence at transcript level	GO:0005737; GO:0051321		SUBCELLULAR LOCATION: Cytoplasm {ECO:0000250|UniProtKB:A2AG06}.
A2VDJ0	TMEM131L	Evidence at protein level	GO:0016055; GO:0005737; GO:0005783; GO:0016021; GO:0090090; GO:0033088; GO:0005886	SIGNAL 1 40 {ECO:0000255}.	SUBCELLULAR LOCATION: Cell membrane {ECO:0000269|PubMed:23690469}; Single-pass type I membrane protein {ECO:0000305}. Cytoplasm {ECO:0000269|PubMed:23690469}. Note=During intrathymic development, resides in punctate cytoplasmic structures in DN1 and DN2 cells. In DN3 cells, found in large crescent-shaped membrane structures, which preferentially localize in cell-to-cell contact zones. {ECO:000026…	TRANSMEM 870 890 Helical. {ECO:0000255}.
A3KPC7	HIST1H2AH	Evidence at transcript level	GO:0003677; GO:0000786; GO:0005634		SUBCELLULAR LOCATION: Chromosome {ECO:0000256|SAAS:SAAS00534031}.; SUBCELLULAR LOCATION: Nucleus {ECO:0000256|RuleBase:RU000527, ECO:0000256|SAAS:SAAS00534029}.
A3R0T7	NA	Evidence at transcript level	GO:0003677; GO:0000786; GO:0006334; GO:0005634		SUBCELLULAR LOCATION: Chromosome {ECO:0000256|SAAS:SAAS00569684}.; SUBCELLULAR LOCATION: Nucleus {ECO:0000256|RuleBase:RU003895, ECO:0000256|SAAS:SAAS00569685}.
A3R0T8	HIST1H1E	Evidence at transcript level	GO:0003677; GO:0098532; GO:0080182; GO:0000122; GO:0000786; GO:0006334; GO:0016584; GO:0005634		SUBCELLULAR LOCATION: Chromosome {ECO:0000256|SAAS:SAAS00569684}.; SUBCELLULAR LOCATION: Nucleus {ECO:0000256|RuleBase:RU003895, ECO:0000256|SAAS:SAAS00569685}.
A4D0T4	FOXP2	Predicted	GO:0005634; GO:0043565; GO:0003700; GO:0006351		SUBCELLULAR LOCATION: Nucleus {ECO:0000256|SAAS:SAAS00582275}.
A4D0Z1	PAX4	Predicted	GO:0007275; GO:0005634; GO:0006355; GO:0043565; GO:0006351		SUBCELLULAR LOCATION: Nucleus {ECO:0000256|RuleBase:RU000491, ECO:0000256|SAAS:SAAS00117811}.
A4D127	NA	Predicted	GO:0005634; GO:0006355; GO:0043565		SUBCELLULAR LOCATION: Nucleus {ECO:0000256|RuleBase:RU000682, ECO:0000256|SAAS:SAAS00544279}.
A4D177	CBX3	Predicted	GO:0071549; GO:0005634; GO:0035985		SUBCELLULAR LOCATION: Nucleus {ECO:0000256|SAAS:SAAS00539527}.
A4D182	HOXA3	Evidence at transcript level	GO:0005634; GO:0006355; GO:0043565		SUBCELLULAR LOCATION: Nucleus {ECO:0000256|RuleBase:RU000682, ECO:0000256|SAAS:SAAS00544279}.
A4D1E9	GTPBP10	Evidence at protein level	GO:0005525; GO:0003924; GO:0005694; GO:0000287; GO:0005739; GO:0005730; GO:0044822; GO:0042254		SUBCELLULAR LOCATION: Nucleus, nucleolus {ECO:0000269|PubMed:17054726}. Chromosome {ECO:0000269|PubMed:17054726}. Note=Found in the dense fibrillar compartment region of the nucleolus. At the onset of mitosis moves to the chromosome surface and remains there until anaphase. Gradually re-assembles into the nucleolus at late anaphase to telophase.
A4D210	EIF3S9	Inferred from homology	GO:0016282; GO:0033290; GO:0005852; GO:0001731; GO:0000166; GO:0006446; GO:0003743		SUBCELLULAR LOCATION: Cytoplasm {ECO:0000256|HAMAP-Rule:MF_03001, ECO:0000256|PIRNR:PIRNR036424, ECO:0000256|SAAS:SAAS00319717}.
A4D256	CDC14C	Evidence at transcript level	GO:0005737; GO:0016021; GO:0005730; GO:0005634; GO:1904668; GO:0004722; GO:0004725; GO:0008138		SUBCELLULAR LOCATION: Membrane {ECO:0000305}; Single-pass membrane protein {ECO:0000305}. Nucleus, nucleolus. Note=Nucleolar during interphase. {ECO:0000250}.	TRANSMEM 522 544 Helical. {ECO:0000255}.
A4D299	TAF6	Predicted	GO:0006352; GO:0005737; GO:0005634; GO:0051090		SUBCELLULAR LOCATION: Nucleus {ECO:0000256|SAAS:SAAS00570996}.
A4FTV9	HIST1H2AK	Evidence at transcript level	GO:0003677; GO:0000786; GO:0005634		SUBCELLULAR LOCATION: Chromosome {ECO:0000256|SAAS:SAAS00534031}.; SUBCELLULAR LOCATION: Nucleus {ECO:0000256|RuleBase:RU000527, ECO:0000256|SAAS:SAAS00534029}.
A4GW67	TP53	Inferred from homology	GO:0006915; GO:0007049; GO:0005737; GO:0046872; GO:0005634; GO:0003700; GO:0044212; GO:0006351		SUBCELLULAR LOCATION: Cytoplasm {ECO:0000256|RuleBase:RU003304}. Nucleus {ECO:0000256|RuleBase:RU003304}.
A4GW74	TP53	Inferred from homology	GO:0006915; GO:0007049; GO:0005737; GO:0046872; GO:0005634; GO:0003700; GO:0044212; GO:0006351		SUBCELLULAR LOCATION: Cytoplasm {ECO:0000256|RuleBase:RU003304}. Nucleus {ECO:0000256|RuleBase:RU003304}.
A4GW75	TP53	Inferred from homology	GO:0006915; GO:0007049; GO:0005737; GO:0046872; GO:0005634; GO:0003700; GO:0044212; GO:0006351		SUBCELLULAR LOCATION: Cytoplasm {ECO:0000256|RuleBase:RU003304}. Nucleus {ECO:0000256|RuleBase:RU003304}.
A4GW76	TP53	Inferred from homology	GO:0006915; GO:0007049; GO:0005737; GO:0046872; GO:0005634; GO:0003700; GO:0044212; GO:0006351		SUBCELLULAR LOCATION: Cytoplasm {ECO:0000256|RuleBase:RU003304}. Nucleus {ECO:0000256|RuleBase:RU003304}.
A4GW97	TP53	Inferred from homology	GO:0006915; GO:0007049; GO:0005737; GO:0046872; GO:0005634; GO:0003700; GO:0044212; GO:0006351		SUBCELLULAR LOCATION: Cytoplasm {ECO:0000256|RuleBase:RU003304}. Nucleus {ECO:0000256|RuleBase:RU003304}.
A4GWB4	TP53	Inferred from homology	GO:0006915; GO:0007049; GO:0005737; GO:0046872; GO:0005634; GO:0003700; GO:0044212; GO:0006351		SUBCELLULAR LOCATION: Cytoplasm {ECO:0000256|RuleBase:RU003304}. Nucleus {ECO:0000256|RuleBase:RU003304}.
A4GWB5	TP53	Inferred from homology	GO:0006915; GO:0007049; GO:0005737; GO:0046872; GO:0005634; GO:0003700; GO:0044212; GO:0006351		SUBCELLULAR LOCATION: Cytoplasm {ECO:0000256|RuleBase:RU003304}. Nucleus {ECO:0000256|RuleBase:RU003304}.
A4GXA9	EME2	Evidence at protein level	GO:0003677; GO:0006310; GO:0006281; GO:0048476; GO:0004519; GO:0005634		SUBCELLULAR LOCATION: Nucleus {ECO:0000305}.
A4VCI1	DNAJC1	Evidence at transcript level	GO:0003677; GO:0005634		SUBCELLULAR LOCATION: Nucleus {ECO:0000256|SAAS:SAAS00548613}.
A5D8V7	CCDC151	Evidence at protein level	GO:0005930; GO:0005814; GO:0036064; GO:0005929; GO:0003341; GO:0007368; GO:0036158; GO:1902017		SUBCELLULAR LOCATION: Cell projection, cilium {ECO:0000250|UniProtKB:Q8BSN3}. Cytoplasm, cytoskeleton, cilium basal body {ECO:0000250|UniProtKB:Q8BSN3}. Cytoplasm, cytoskeleton, microtubule organizing center, centrosome, centriole {ECO:0000250|UniProtKB:Q8BSN3}. Cytoplasm, cytoskeleton, cilium axoneme {ECO:0000269|PubMed:25192045}.
A5LHX3	PSMB11	Evidence at transcript level	GO:0038095; GO:0000165; GO:0038061; GO:0050852; GO:0060071; GO:0031145; GO:0002479; GO:0005829; GO:0090090; GO:0005634; GO:0008233; GO:0090263; GO:0051437; GO:0005839; GO:0043161; GO:0000209; GO:0006508; GO:0006521; GO:0043488; GO:0002223; GO:0004298; GO:0033209		SUBCELLULAR LOCATION: Cytoplasm {ECO:0000255|PROSITE-ProRule:PRU00809}. Nucleus {ECO:0000250}.
A5PKW7	NCOR1	Evidence at transcript level	GO:0003677; GO:0005634		SUBCELLULAR LOCATION: Nucleus {ECO:0000256|SAAS:SAAS00548613}.
A5PKX7	MYST3	Evidence at transcript level	GO:0003677; GO:0070776; GO:0048513; GO:0043966; GO:0004402; GO:0000786; GO:0006334; GO:0006355; GO:0003713; GO:0008270		SUBCELLULAR LOCATION: Nucleus {ECO:0000256|RuleBase:RU361211}.
A5PLL1	ANKRD34B	Evidence at transcript level	GO:0005737; GO:0005634		SUBCELLULAR LOCATION: Cytoplasm. Nucleus {ECO:0000250}.
A5PLL3	KAT6A	Evidence at protein level	GO:0003677; GO:0070776; GO:0048513; GO:0043966; GO:0004402; GO:0000786; GO:0006334; GO:0006355; GO:0003713; GO:0008270		SUBCELLULAR LOCATION: Nucleus {ECO:0000256|RuleBase:RU361211}.
A6H8Y1	BDP1	Evidence at protein level	GO:0003677; GO:0001026; GO:0005737; GO:0005654; GO:0000126; GO:0006351		SUBCELLULAR LOCATION: Nucleus {ECO:0000269|PubMed:11161782}.
A6H8Y5	NBN	Evidence at transcript level	GO:0006281; GO:0030870; GO:0000781; GO:0051321; GO:0007093; GO:0000723		SUBCELLULAR LOCATION: Nucleus {ECO:0000256|PIRNR:PIRNR011869}.
A6H901	FOXN4	Evidence at transcript level	GO:0005634; GO:0043565; GO:0003700; GO:0006351		SUBCELLULAR LOCATION: Nucleus {ECO:0000256|SAAS:SAAS00582275}.
A6N6J7	JARID1C	Evidence at transcript level	GO:0003677; GO:0001085; GO:0005737; GO:0034720; GO:0032453; GO:0042802; GO:0000122; GO:0005634; GO:0016706; GO:0008270		SUBCELLULAR LOCATION: Nucleus {ECO:0000256|SAAS:SAAS00575847}.
A6NC42	DPPA5	Evidence at transcript level	GO:0003723; GO:0005737; GO:0007275		SUBCELLULAR LOCATION: Cytoplasm {ECO:0000250}.
A6NCE0	NA	Evidence at protein level	GO:0000981; GO:0005737; GO:0007613; GO:0005634; GO:0060999; GO:0043565; GO:0006351		SUBCELLULAR LOCATION: Nucleus {ECO:0000256|SAAS:SAAS00582275}.
A6NCE7	MAP1LC3B2	Evidence at transcript level	GO:0000045; GO:0000421; GO:0006995; GO:0031410; GO:0005829; GO:0012505; GO:0005874; GO:0008017; GO:0000422		SUBCELLULAR LOCATION: Cytoplasm, cytoskeleton {ECO:0000250}. Endomembrane system {ECO:0000250}; Lipid-anchor {ECO:0000250}. Cytoplasmic vesicle, autophagosome membrane {ECO:0000250}; Lipid-anchor {ECO:0000250}. Note=LC3-II binds to the autophagic membranes. {ECO:0000250}.
A6NCL1	GMNC	Evidence at protein level	GO:0006270; GO:0007049; GO:0008283; GO:0003682; GO:0005634		SUBCELLULAR LOCATION: Nucleus {ECO:0000250}. Note=Associates with chromatin during pre-replication complex (pre-RC) formation. {ECO:0000250}.
A6NCS4	NKX2-6	Evidence at protein level	GO:0055014; GO:0030154; GO:0048565; GO:0035050; GO:0021854; GO:0043066; GO:0005634; GO:0060039; GO:0060037; GO:0008284; GO:0043565; GO:0043586; GO:0003700; GO:0006351; GO:0055015		SUBCELLULAR LOCATION: Nucleus {ECO:0000305}.
A6NCW0	USP17L3	Inferred from homology	GO:0006915; GO:0005783; GO:0005634; GO:0016579; GO:0036459; GO:0006511		SUBCELLULAR LOCATION: Nucleus {ECO:0000250}. Endoplasmic reticulum {ECO:0000250}.
A6NCW7	USP17L4	Inferred from homology	GO:0005783; GO:0005634; GO:0016579; GO:0036459		SUBCELLULAR LOCATION: Nucleus {ECO:0000250}. Endoplasmic reticulum {ECO:0000250}.
A6ND36	FAM83G	Evidence at protein level	GO:0030509; GO:0005829; GO:0005634		SUBCELLULAR LOCATION: Cytoplasm, cytosol {ECO:0000269|PubMed:24554596}. Nucleus {ECO:0000269|PubMed:24554596}. Note=Detected predominantly in cytosolic. Upon BMP stimulation, a small portion of PAWS1 is detected in the nucleus. {ECO:0000269|PubMed:24554596}.
A6NDB9	PALM3	Evidence at protein level	GO:0005524; GO:0008063; GO:0005737; GO:0001960; GO:0005886; GO:0032496		SUBCELLULAR LOCATION: Cytoplasm {ECO:0000250}. Cell membrane {ECO:0000250}; Lipid-anchor {ECO:0000250}.
A6NDE4	RBMY1B	Evidence at transcript level	GO:0003723; GO:0008380; GO:0006397; GO:0008584; GO:0000166; GO:0005634; GO:0007283		SUBCELLULAR LOCATION: Nucleus.
A6NDR6	MEIS3P1	Uncertain	GO:0003677; GO:0005634; GO:0006355		SUBCELLULAR LOCATION: Nucleus {ECO:0000255|PROSITE-ProRule:PRU00108}.
A6NDV4	TMEM8B	Evidence at protein level	GO:0009986; GO:0007160; GO:0005783; GO:0016021; GO:0005739; GO:0005634; GO:0005886; GO:0040008; GO:0007346		SUBCELLULAR LOCATION: Isoform 2: Cell membrane {ECO:0000269|PubMed:17641538}; Multi-pass membrane protein {ECO:0000269|PubMed:17641538}. Cytoplasm {ECO:0000269|PubMed:17641538}. Nucleus {ECO:0000269|PubMed:17641538}. Mitochondrion {ECO:0000269|PubMed:17641538}. Endoplasmic reticulum {ECO:0000269|PubMed:17641538}. Note=Also detected in mitochondrion and endoplasmic reticulum (PubMed:17641538).	TRANSMEM 234 254 Helical. {ECO:0000255}.; TRANSMEM 258 277 Helical. {ECO:0000255}.; TRANSMEM 293 313 Helical. {ECO:0000255}.; TRANSMEM 316 336 Helical. {ECO:0000255}.; TRANSMEM 343 363 Helical. {ECO:0000255}.; TRANSMEM 380 400 Helical. {ECO:0000255}.; TRANSMEM 406 426 Helical. {ECO:0000255}.
A6NDX5	ZNF840P	Uncertain	GO:0003677; GO:0046872; GO:0005634; GO:0006355; GO:0006351		SUBCELLULAR LOCATION: Nucleus {ECO:0000250}.
A6NDY0	PABPN1L	Evidence at transcript level	GO:0003723; GO:0005737; GO:0000166		SUBCELLULAR LOCATION: Cytoplasm {ECO:0000250}.
A6NEQ0	RBMY1E	Evidence at transcript level	GO:0003723; GO:0008380; GO:0006397; GO:0000166; GO:0005634		SUBCELLULAR LOCATION: Nucleus.
A6NF01	POM121B	Uncertain	GO:0051028; GO:0005643; GO:0015031		SUBCELLULAR LOCATION: Nucleus, nuclear pore complex {ECO:0000250}.
A6NF83	NUPR2	Evidence at transcript level	GO:0007050; GO:0006974; GO:0009267; GO:0003682; GO:0071157; GO:0008285; GO:0000122; GO:0005634; GO:0006351		SUBCELLULAR LOCATION: Nucleus {ECO:0000269|PubMed:25899918}.
A6NFD8	HELT	Evidence at transcript level	GO:0021858; GO:0000978; GO:0007417; GO:0010259; GO:0035264; GO:0005634; GO:0045944; GO:0009791; GO:0001967; GO:0005667; GO:0006351; GO:0001078		SUBCELLULAR LOCATION: Nucleus {ECO:0000255|PROSITE-ProRule:PRU00380, ECO:0000255|PROSITE-ProRule:PRU00981}.
A6NFI3	ZNF316	Evidence at protein level	GO:0003677; GO:0046872; GO:0005634; GO:0006355; GO:0006351		SUBCELLULAR LOCATION: Nucleus {ECO:0000250}.
A6NFN3	RBFOX3	Evidence at transcript level	GO:0003677; GO:0008380; GO:0005737; GO:0003729; GO:0006397; GO:0000166; GO:0005634; GO:0043204; GO:0000381		SUBCELLULAR LOCATION: Nucleus {ECO:0000250}. Cytoplasm {ECO:0000250}.
A6NFQ7	DPRX	Inferred from homology	GO:0005634; GO:0006355; GO:0043565; GO:0006351		SUBCELLULAR LOCATION: Nucleus {ECO:0000255|PROSITE-ProRule:PRU00108}.
A6NFY4	NEMP2	Evidence at transcript level	GO:0016021; GO:0005637	SIGNAL 1 24 {ECO:0000255}.	SUBCELLULAR LOCATION: Nucleus inner membrane {ECO:0000250|UniProtKB:Q6ZQE4}; Multi-pass membrane protein {ECO:0000255}; Nucleoplasmic side {ECO:0000250|UniProtKB:B9X187}.	TRANSMEM 148 168 Helical. {ECO:0000255}.; TRANSMEM 177 197 Helical. {ECO:0000255}.; TRANSMEM 207 227 Helical. {ECO:0000255}.; TRANSMEM 239 259 Helical. {ECO:0000255}.; TRANSMEM 280 300 Helical. {ECO:0000255}.
A6NGB9	WIPF3	Evidence at protein level	GO:0038096; GO:0005884; GO:0051015; GO:0030048; GO:0030154; GO:0005829; GO:0006897; GO:0007275; GO:0051127; GO:0008360; GO:0007283		SUBCELLULAR LOCATION: Cytoplasm. Note=In hippocampal neurons colocalizes with WASL in the cell body, axons and the growth cone. {ECO:0000250}.
A6NGD5	ZSCAN5C	Uncertain	GO:0000981; GO:0046872; GO:0003676; GO:0005634; GO:0006351		SUBCELLULAR LOCATION: Nucleus {ECO:0000255|PROSITE-ProRule:PRU00187}.
A6NGQ2	OOEP	Evidence at transcript level	GO:0003723; GO:0045177; GO:0005938; GO:0043623; GO:0007566; GO:0009880; GO:0035088; GO:0009566; GO:0001701; GO:0043234; GO:0006468		SUBCELLULAR LOCATION: Cytoplasm {ECO:0000250}. Note=In the subcortical cytoplasm of early embryos from the 1-cell to the blastocyst stages. From the 2-cell stage, still detected in the subcortex, but excluded from cell-cell contact regions (By similarity). {ECO:0000250}.
A6NGQ4	ATG4C	Evidence at protein level	GO:0006914; GO:0004197; GO:0005737; GO:0015031		SUBCELLULAR LOCATION: Cytoplasm {ECO:0000256|SAAS:SAAS00570686}.
A6NGV6	ARNT	Evidence at protein level	GO:0005737; GO:0005634; GO:0003700; GO:0005667; GO:0006351		SUBCELLULAR LOCATION: Nucleus {ECO:0000256|SAAS:SAAS00600858}.
A6NGY1	FRG2C	Inferred from homology	GO:0005634		SUBCELLULAR LOCATION: Nucleus {ECO:0000250}.
A6NHC0	CAPN8	Evidence at transcript level	GO:0005794; GO:0005509; GO:0004198; GO:0005737; GO:0007586; GO:0006508		SUBCELLULAR LOCATION: Cytoplasm {ECO:0000250}. Golgi apparatus {ECO:0000250}.
A6NHG4	DDTL	Evidence at transcript level	GO:0005737; GO:0070062; GO:0016829		SUBCELLULAR LOCATION: Cytoplasm {ECO:0000250}.
A6NHJ4	ZNF860	Evidence at transcript level	GO:0003677; GO:0046872; GO:0005634; GO:0006355; GO:0006351		SUBCELLULAR LOCATION: Nucleus {ECO:0000250}.
A6NHL2	TUBAL3	Evidence at protein level	GO:0005525; GO:0003924; GO:0005737; GO:0005874; GO:0007017; GO:0005200		SUBCELLULAR LOCATION: Cytoplasm, cytoskeleton {ECO:0000250}.
A6NHQ2	FBLL1	Inferred from homology	GO:0015030; GO:0003723; GO:0000494; GO:0031428; GO:1990258; GO:1990259; GO:0031167; GO:0008649; GO:0032040; GO:0008033		SUBCELLULAR LOCATION: Nucleus, nucleolus. Note=Fibrillar region of the nucleolus. {ECO:0000250}.
A6NHT5	HMX3	Evidence at protein level	GO:0000977; GO:0007420; GO:0030154; GO:0007566; GO:0042472; GO:0060135; GO:0050885; GO:0005634; GO:0006355; GO:0006351		SUBCELLULAR LOCATION: Nucleus {ECO:0000255|PROSITE-ProRule:PRU00108}.
A6NHX0	CASTOR2	Evidence at protein level	GO:0005829; GO:0042802; GO:1904262		SUBCELLULAR LOCATION: Cytoplasm, cytosol {ECO:0000269|PubMed:26972053}.
A6NI15	MSGN1	Inferred from homology	GO:0003677; GO:0030154; GO:0003682; GO:0005634; GO:0007379; GO:0001756; GO:0001228		SUBCELLULAR LOCATION: Nucleus {ECO:0000255|PROSITE-ProRule:PRU00981}.
A6NI72	NCF1B	Uncertain	GO:0043020; GO:0005829; GO:0055114; GO:0043325; GO:0045730; GO:0006801; GO:0016176; GO:0016175		SUBCELLULAR LOCATION: Cytoplasm {ECO:0000250}.
A6NIX2	WTIP	Evidence at protein level	GO:0005912; GO:0000932; GO:0007010; GO:0035195; GO:0035331; GO:0005634; GO:2000637; GO:0022604; GO:0006355; GO:0001666; GO:0003714; GO:0006351; GO:0008270		SUBCELLULAR LOCATION: Cell junction, adherens junction. Nucleus {ECO:0000250}. Cytoplasm, P-body. Note=Following podocyte injury, caused by treatment with LPS, puromycin aminonucleoside, ultraviolet or hydrogen peroxide, translocates from sites of cell-cell contacts into the cytosol and nucleus. The shift from cell contacts to intracellular plaques starts as early as 1 hour after LPS stimulation …
A6NIZ1	NA	Evidence at transcript level	GO:0005525; GO:0008283; GO:0035690; GO:0097211; GO:0071407; GO:0005829; GO:2000301; GO:0005886; GO:0070374; GO:0009743; GO:0007264		SUBCELLULAR LOCATION: Cell membrane {ECO:0000250}. Cytoplasm, cytosol {ECO:0000250}. Note=May shuttle between plasma membrane and cytosol. {ECO:0000250}.
A6NJ46	NKX6-3	Evidence at transcript level	GO:0001709; GO:0002067; GO:0030857; GO:0005634; GO:0006355; GO:0043565; GO:0006351		SUBCELLULAR LOCATION: Nucleus {ECO:0000255|PROSITE-ProRule:PRU00108}.
A6NJ64	NPIPB2	Uncertain	GO:0005634		SUBCELLULAR LOCATION: Nucleus {ECO:0000250}.
A6NJG6	ARGFX	Evidence at transcript level	GO:0005634; GO:0006355; GO:0043565; GO:0006351		SUBCELLULAR LOCATION: Nucleus {ECO:0000255|PROSITE-ProRule:PRU00108}.
A6NJL1	ZSCAN5B	Inferred from homology	GO:0003677; GO:0000981; GO:0046872; GO:0005634; GO:0006351		SUBCELLULAR LOCATION: Nucleus {ECO:0000255|PROSITE-ProRule:PRU00187}.
A6NJT0	UNCX	Inferred from homology	GO:0001502; GO:0035726; GO:0021516; GO:0005634; GO:0021889; GO:0007389; GO:0045595; GO:0006355; GO:0043565; GO:0006351		SUBCELLULAR LOCATION: Nucleus {ECO:0000255|PROSITE-ProRule:PRU00108}.
A6NK53	ZNF233	Evidence at transcript level	GO:0003677; GO:0046872; GO:0005634; GO:0006355; GO:0006351		SUBCELLULAR LOCATION: Nucleus {ECO:0000305}.
A6NK75	ZNF98	Evidence at transcript level	GO:0000978; GO:0046872; GO:0005634; GO:0006355; GO:0006351		SUBCELLULAR LOCATION: Nucleus {ECO:0000305}.
A6NK89	RASSF10	Evidence at transcript level	GO:0005829; GO:0005815; GO:0007165; GO:0000922		SUBCELLULAR LOCATION: Cytoplasm, cytosol {ECO:0000269|PubMed:20956940}. Cytoplasm, cytoskeleton, microtubule organizing center, centrosome {ECO:0000269|PubMed:20956940}. Cytoplasm, cytoskeleton, spindle pole {ECO:0000269|PubMed:20956940}. Note=During interphase, predominantly cytoplasmic, although some nuclear staining in several tumor cell contexts. During prophase, observed at developing centro…
A6NKD2	TSPY2	Inferred from homology	GO:0030154; GO:0005737; GO:0007506; GO:0006334; GO:0005634; GO:0007283		SUBCELLULAR LOCATION: Cytoplasm {ECO:0000250}. Nucleus {ECO:0000250}.
A6NKF1	SAC3D1	Evidence at protein level	GO:0051301; GO:0005737; GO:0005815; GO:0007067; GO:0005819		SUBCELLULAR LOCATION: Cytoplasm, cytoskeleton, microtubule organizing center, centrosome {ECO:0000250}. Cytoplasm, cytoskeleton, spindle {ECO:0000250}. Note=Localizes on centrosomes in interphase cells and at spindles in mitosis. {ECO:0000250}.
A6NKF2	ARID3C	Inferred from homology	GO:0003677; GO:0003682; GO:0005737; GO:0045121; GO:0005634; GO:0045944; GO:0006351		SUBCELLULAR LOCATION: Nucleus {ECO:0000255|PROSITE-ProRule:PRU00355}.
A6NLF2	ELOA3D	Inferred from homology	GO:0003677; GO:0070449; GO:0016021; GO:0006355; GO:0006368		SUBCELLULAR LOCATION: Nucleus {ECO:0000255|PROSITE-ProRule:PRU00649}.
A6NLG4	SHOX2	Evidence at transcript level	GO:0005634; GO:0006355; GO:0043565		SUBCELLULAR LOCATION: Nucleus {ECO:0000256|RuleBase:RU000682, ECO:0000256|SAAS:SAAS00159552}.
A6NLJ0	C2CD4B	Evidence at transcript level	GO:0005509; GO:0005544; GO:0005925; GO:0005730; GO:0005886		SUBCELLULAR LOCATION: Nucleus {ECO:0000269|PubMed:15527968}.
A6NLW8	DUXA	Inferred from homology	GO:0003677; GO:0005634; GO:0006355; GO:0006351		SUBCELLULAR LOCATION: Nucleus {ECO:0000255|PROSITE-ProRule:PRU00108}.
A6NM28	ZFP92	Evidence at transcript level	GO:0003677; GO:0046872; GO:0005634; GO:0006355; GO:0006351		SUBCELLULAR LOCATION: Nucleus {ECO:0000250}.
A6NM43	CCT8L1P	Uncertain	GO:0005524; GO:0005737		SUBCELLULAR LOCATION: Cytoplasm {ECO:0000250}.
A6NMT0	DBX1	Inferred from homology	GO:0005634; GO:0006357; GO:0043565; GO:0021521		SUBCELLULAR LOCATION: Nucleus {ECO:0000255|PROSITE-ProRule:PRU00108}.
A6NN14	ZNF729	Evidence at transcript level	GO:0003677; GO:0046872; GO:0005634; GO:0006355; GO:0006351		SUBCELLULAR LOCATION: Nucleus {ECO:0000305}.
A6NNA5	DRGX	Inferred from homology	GO:0007411; GO:0009593; GO:0016048; GO:0021516; GO:0001764; GO:0005634; GO:0006355; GO:0050954; GO:0043565; GO:0006351; GO:0021559		SUBCELLULAR LOCATION: Nucleus {ECO:0000255|PROSITE-ProRule:PRU00108, ECO:0000255|PROSITE-ProRule:PRU00138}.
A6NNF4	ZNF726	Evidence at transcript level	GO:0003677; GO:0046872; GO:0005634; GO:0006355; GO:0003700; GO:0006351		SUBCELLULAR LOCATION: Nucleus {ECO:0000250}.
A6NNU8	NR0B1	Evidence at protein level	GO:0005634; GO:0006355; GO:0043401; GO:0006351		SUBCELLULAR LOCATION: Nucleus {ECO:0000256|SAAS:SAAS00595767}.
A6NNZ2	TUBB8B	Evidence at protein level	GO:0005525; GO:0003924; GO:0005737; GO:0070062; GO:0005874; GO:0007017; GO:0005200		SUBCELLULAR LOCATION: Cytoplasm, cytoskeleton {ECO:0000250}.
A6NP11	ZNF716	Evidence at transcript level	GO:0000978; GO:0046872; GO:0005634; GO:0006355; GO:0006351		SUBCELLULAR LOCATION: Nucleus {ECO:0000305}.
A6PVC2	TTLL8	Evidence at transcript level	GO:0005524; GO:0005930; GO:0005929; GO:0005737; GO:0005874; GO:0015630; GO:0018094; GO:0070735; GO:0070736		SUBCELLULAR LOCATION: Cytoplasm, cytoskeleton {ECO:0000250}. Cell projection, cilium {ECO:0000250}. Cytoplasm, cytoskeleton, cilium axoneme {ECO:0000250}.
A6PVN5	PTPA	Evidence at protein level	GO:0005737; GO:0005654; GO:0003755; GO:0019211		SUBCELLULAR LOCATION: Cytoplasm {ECO:0000256|RuleBase:RU361210}.
A6PVN6	PTPA	Evidence at protein level	GO:0005737; GO:0003755; GO:0019211		SUBCELLULAR LOCATION: Cytoplasm {ECO:0000256|RuleBase:RU361210}.
A6PVN7	PTPA	Evidence at protein level	GO:0005737; GO:0003755; GO:0019211		SUBCELLULAR LOCATION: Cytoplasm {ECO:0000256|RuleBase:RU361210}.
A6PVN8	PTPA	Evidence at protein level	GO:0005737; GO:0003755; GO:0019211		SUBCELLULAR LOCATION: Cytoplasm {ECO:0000256|RuleBase:RU361210}.
A6PVN9	PTPA	Evidence at protein level	GO:0005737; GO:0005654; GO:0003755; GO:0019211		SUBCELLULAR LOCATION: Cytoplasm {ECO:0000256|RuleBase:RU361210}.
A6YCE1	PRKAR1A/RARA	Evidence at transcript level	GO:0016301; GO:0005634; GO:0043565; GO:0003700; GO:0006351; GO:0008270		SUBCELLULAR LOCATION: Nucleus {ECO:0000256|SAAS:SAAS00586772}.
A7E2A2	APAF1	Evidence at transcript level	GO:0043531; GO:0005524; GO:0043293; GO:0097190; GO:0042981		SUBCELLULAR LOCATION: Cytoplasm {ECO:0000256|PIRNR:PIRNR037646}.
A7E2B6	MYST4	Evidence at transcript level	GO:0003677; GO:0004402; GO:0000786; GO:0006334; GO:0005634; GO:0006355; GO:0008270		SUBCELLULAR LOCATION: Nucleus {ECO:0000256|RuleBase:RU361211}.
A7E2U8	C4orf47	Evidence at transcript level	GO:0005813; GO:0005737		SUBCELLULAR LOCATION: Cytoplasm, cytoskeleton, microtubule organizing center, centrosome {ECO:0000269|PubMed:25074808}.
A7KAX9	ARHGAP32	Evidence at protein level	GO:0005096; GO:0000139; GO:0015629; GO:0005938; GO:0030054; GO:0005829; GO:0043197; GO:0005789; GO:0010008; GO:0035091; GO:0014069; GO:0045211; GO:0051056; GO:0007165		SUBCELLULAR LOCATION: Cell junction, synapse, postsynaptic cell membrane, postsynaptic density {ECO:0000250|UniProtKB:Q811P8}. Cell projection, dendritic spine {ECO:0000250|UniProtKB:Q811P8}. Cytoplasm, cell cortex {ECO:0000269|PubMed:12446789}. Endosome membrane {ECO:0000269|PubMed:17663722}. Golgi apparatus membrane {ECO:0000269|PubMed:17663722}. Endoplasmic reticulum membrane {ECO:0000250|UniP…
A7MD06	ZNF483	Evidence at transcript level	GO:0046872; GO:0003676; GO:0005634; GO:0003700; GO:0006351		SUBCELLULAR LOCATION: Nucleus {ECO:0000256|SAAS:SAAS00574784}.
A7MD48	SRRM4	Evidence at protein level	GO:0008380; GO:0030154; GO:0003729; GO:0006397; GO:0007399; GO:0005634; GO:0043484; GO:0000381; GO:0007605		SUBCELLULAR LOCATION: Nucleus {ECO:0000250}.
A7WPU7	SRY	Inferred from homology	GO:0003677; GO:0030154; GO:0030238; GO:0005634; GO:0007548; GO:0003700; GO:0006351		SUBCELLULAR LOCATION: Nucleus {ECO:0000256|SAAS:SAAS00548902}.
A7WPU8	SRY	Inferred from homology	GO:0008301; GO:0000981; GO:0030154; GO:0008584; GO:0030238; GO:0000122; GO:0044798; GO:0006351		SUBCELLULAR LOCATION: Nucleus {ECO:0000256|SAAS:SAAS00548902}.
A7WPU9	SRY	Inferred from homology	GO:0003677; GO:0030154; GO:0030238; GO:0005634; GO:0007548; GO:0003700; GO:0006351		SUBCELLULAR LOCATION: Nucleus {ECO:0000256|SAAS:SAAS00548902}.
A7WPV0	SRY	Inferred from homology	GO:0003677; GO:0030154; GO:0030238; GO:0005634; GO:0007548; GO:0003700; GO:0006351		SUBCELLULAR LOCATION: Nucleus {ECO:0000256|SAAS:SAAS00548902}.
A7WPV2	SRY	Inferred from homology	GO:0003677; GO:0030154; GO:0030238; GO:0005634; GO:0007548; GO:0003700; GO:0006351		SUBCELLULAR LOCATION: Nucleus {ECO:0000256|SAAS:SAAS00548902}.
A8CG34	POM121C	Evidence at protein level	GO:0005789; GO:0031047; GO:0016021; GO:0075733; GO:0006406; GO:0007077; GO:0005635; GO:0031965; GO:0005643; GO:0016925; GO:0015031; GO:1900034; GO:0010827; GO:0006409; GO:0016032; GO:0019083		SUBCELLULAR LOCATION: Nucleus, nuclear pore complex {ECO:0000269|PubMed:17900573}. Nucleus membrane {ECO:0000269|PubMed:17900573}; Single-pass membrane protein {ECO:0000269|PubMed:17900573}. Endoplasmic reticulum membrane {ECO:0000250}; Single-pass membrane protein {ECO:0000250}. Note=Stably associated with the NPC throughout interphase and the endoplasmic reticulum during metaphase. {ECO:0000250…	TRANSMEM 41 61 Helical. {ECO:0000255}.
A8IE48	GABPA	Evidence at transcript level	GO:0003682; GO:0001701; GO:0045653; GO:0000122; GO:0005654; GO:0043565; GO:0001228		SUBCELLULAR LOCATION: Nucleus {ECO:0000256|SAAS:SAAS00594387}.
A8JZY9	NA	Evidence at transcript level	GO:0005525; GO:0003924; GO:0005737; GO:0005874; GO:0007017; GO:0005200		SUBCELLULAR LOCATION: Cytoplasm, cytoskeleton {ECO:0000256|SAAS:SAAS00392180}.
A8K0D4	NA	Evidence at transcript level	GO:0006352; GO:0005634; GO:0051090		SUBCELLULAR LOCATION: Nucleus {ECO:0000256|SAAS:SAAS00570996}.
A8K0G7	NA	Evidence at transcript level	GO:0003677; GO:0046872; GO:0005634		SUBCELLULAR LOCATION: Nucleus {ECO:0000256|RuleBase:RU000682}.
A8K0N9	NA	Evidence at transcript level	GO:0034464; GO:0060170; GO:0005737; GO:0005815; GO:0035058		SUBCELLULAR LOCATION: Cell projection, cilium membrane {ECO:0000256|PIRNR:PIRNR013684}. Cytoplasm, cytoskeleton, microtubule organizing center, centrosome, centriolar satellite {ECO:0000256|PIRNR:PIRNR013684}.
A8K0P8	NA	Evidence at transcript level	GO:0005634		SUBCELLULAR LOCATION: Nucleus {ECO:0000256|SAAS:SAAS00560942}.
A8K0S8	MEIS3P2	Evidence at transcript level	GO:0003677; GO:0005634; GO:0006355		SUBCELLULAR LOCATION: Nucleus {ECO:0000255|PROSITE-ProRule:PRU00108}.
A8K0W8	NA	Evidence at transcript level	GO:0004402; GO:0030374; GO:0005634; GO:0006355; GO:0006351		SUBCELLULAR LOCATION: Nucleus {ECO:0000256|SAAS:SAAS00600858}.
A8K0Z3	WASHC1	Evidence at protein level	GO:0034314; GO:0071203; GO:0043014; GO:0005776; GO:0005814; GO:0031410; GO:0005829; GO:0005769; GO:0031901; GO:0016197; GO:0006887; GO:0022617; GO:0071437; GO:0005770; GO:0030335; GO:0031274; GO:0015031; GO:0055037; GO:0055038; GO:0042147; GO:1990126; GO:0031625		SUBCELLULAR LOCATION: Early endosome membrane {ECO:0000269|PubMed:19922874}. Recycling endosome membrane {ECO:0000250|UniProtKB:Q8VDD8}. Late endosome {ECO:0000269|PubMed:22114305, ECO:0000269|PubMed:24344185}. Cytoplasmic vesicle, autophagosome {ECO:0000250|UniProtKB:Q8VDD8}. Cytoplasm, cytoskeleton, microtubule organizing center, centrosome, centriole {ECO:0000250|UniProtKB:Q8VDD8}. Note=Locali…
A8K0Z7	NA	Evidence at transcript level	GO:0003677; GO:0046872; GO:0007275; GO:0005634; GO:0006355; GO:0006351		SUBCELLULAR LOCATION: Nucleus {ECO:0000256|RuleBase:RU004489}.
A8K187	NA	Evidence at transcript level	GO:0046872; GO:0003676; GO:0005634; GO:0003700; GO:0006351		SUBCELLULAR LOCATION: Nucleus {ECO:0000256|SAAS:SAAS00574784}.
A8K1D3	NA	Evidence at transcript level	GO:0006281; GO:0030870; GO:0000781; GO:0051321; GO:0007093; GO:0000723		SUBCELLULAR LOCATION: Nucleus {ECO:0000256|PIRNR:PIRNR011869}.
A8K1E4	NA	Evidence at transcript level	GO:0005737; GO:0005874; GO:0007020; GO:0005815; GO:0000922		SUBCELLULAR LOCATION: Cytoplasm, cytoskeleton, microtubule organizing center {ECO:0000256|RuleBase:RU363050}.
A8K1M8	NA	Evidence at transcript level	GO:0003677; GO:0005634; GO:0006355; GO:0006351		SUBCELLULAR LOCATION: Nucleus {ECO:0000256|SAAS:SAAS00573650}.
A8K1V4	NA	Evidence at transcript level	GO:0004402; GO:0030374; GO:0005634; GO:0006355; GO:0006351		SUBCELLULAR LOCATION: Nucleus {ECO:0000256|SAAS:SAAS00600858}.
A8K206	NA	Evidence at transcript level	GO:0005634; GO:0043565; GO:0003707; GO:0004887; GO:0006351; GO:0008270		SUBCELLULAR LOCATION: Nucleus {ECO:0000256|SAAS:SAAS00595767}.
A8K3C3	NA	Evidence at transcript level	GO:0005524; GO:0005737; GO:0006457		SUBCELLULAR LOCATION: Cytoplasm {ECO:0000256|SAAS:SAAS00547836}.
A8K3H3	RARG	Evidence at transcript level	GO:0070384; GO:0000977; GO:0009952; GO:0071300; GO:0031076; GO:0048048; GO:0035116; GO:0060324; GO:0002068; GO:0003430; GO:0035264; GO:0043066; GO:0008285; GO:0032331; GO:0000122; GO:0001843; GO:0000790; GO:0005654; GO:0043065; GO:0008284; GO:0045944; GO:0060740; GO:0031641; GO:0045637; GO:0003406; GO:0003708; GO:0003707; GO:0060534; GO:0005667; GO:0006351; GO:0008270		SUBCELLULAR LOCATION: Nucleus {ECO:0000256|SAAS:SAAS00595767}.
A8K3J6	NA	Evidence at transcript level	GO:0003677; GO:0005634; GO:0003700; GO:0006351		SUBCELLULAR LOCATION: Nucleus {ECO:0000256|SAAS:SAAS00353240}.
A8K3N2	NA	Evidence at transcript level	GO:0001104; GO:0016592; GO:0006351		SUBCELLULAR LOCATION: Nucleus {ECO:0000256|PIRNR:PIRNR023869}.
A8K3R2	BOP1	Evidence at transcript level	GO:0000466; GO:0000463; GO:0005730; GO:0005654; GO:0030687; GO:0043021		SUBCELLULAR LOCATION: Nucleus, nucleolus {ECO:0000256|HAMAP-Rule:MF_03027}. Nucleus, nucleoplasm {ECO:0000256|HAMAP-Rule:MF_03027}.; SUBCELLULAR LOCATION: Nucleus, nucleoplasm {ECO:0000256|SAAS:SAAS00535448}.
A8K3S1	NA	Evidence at transcript level	GO:0006044; GO:0005975; GO:0005737; GO:0004342; GO:0016787		SUBCELLULAR LOCATION: Cytoplasm {ECO:0000256|RuleBase:RU361197}.
A8K3X2	TARBP2	Evidence at transcript level	GO:0016442; GO:0003725; GO:0035198; GO:0035280; GO:0005634; GO:0048471; GO:0031054; GO:0030422; GO:0046782; GO:0035197; GO:0030423		SUBCELLULAR LOCATION: Cytoplasm {ECO:0000256|HAMAP-Rule:MF_03034}. Cytoplasm, perinuclear region {ECO:0000256|HAMAP-Rule:MF_03034}. Nucleus {ECO:0000256|HAMAP-Rule:MF_03034}.
A8K3X7	NA	Evidence at transcript level	GO:0005634; GO:0006355; GO:0043565; GO:0008270		SUBCELLULAR LOCATION: Nucleus {ECO:0000256|RuleBase:RU000682, ECO:0000256|SAAS:SAAS00397436}.
A8K3Z5	NA	Evidence at transcript level	GO:0051028; GO:0031965; GO:0005643; GO:0000166; GO:0015031; GO:0055085		SUBCELLULAR LOCATION: Nucleus, nuclear pore complex {ECO:0000256|PIRNR:PIRNR038119}.
A8K443	ELF5	Evidence at transcript level	GO:0000981; GO:0005634; GO:0043565		SUBCELLULAR LOCATION: Nucleus {ECO:0000256|SAAS:SAAS00594387}.
A8K4D1	NA	Evidence at transcript level	GO:0005634; GO:0006355; GO:0043565		SUBCELLULAR LOCATION: Nucleus {ECO:0000256|RuleBase:RU000682}.
A8K4D5	KYNU	Evidence at transcript level	GO:0034354; GO:0097053; GO:0043420; GO:0005737; GO:0030429; GO:0030170; GO:0019805; GO:0006569		SUBCELLULAR LOCATION: Cytoplasm {ECO:0000256|HAMAP-Rule:MF_03017, ECO:0000256|PIRNR:PIRNR038800}.
A8K4M4	NA	Evidence at transcript level	GO:0003677; GO:0005783; GO:0016021; GO:0005634		SUBCELLULAR LOCATION: Nucleus {ECO:0000256|RuleBase:RU000682}.	TRANSMEM 45 68 Helical. {ECO:0000256|SAM:Phobius}.; TRANSMEM 140 160 Helical. {ECO:0000256|SAM:Phobius}.; TRANSMEM 210 229 Helical. {ECO:0000256|SAM:Phobius}.; TRANSMEM 264 291 Helical. {ECO:0000256|SAM:Phobius}.; TRANSMEM 303 324 Helical. {ECO:0000256|SAM:Phobius}.
A8K4S9	NA	Evidence at transcript level	GO:0003677; GO:0005737; GO:0005634; GO:0004871; GO:0003700; GO:0006351		SUBCELLULAR LOCATION: Cytoplasm {ECO:0000256|RuleBase:RU046415}.; SUBCELLULAR LOCATION: Nucleus {ECO:0000256|RuleBase:RU046415}.
A8K4W0	RPS3A	Evidence at transcript level	GO:0030154; GO:0022627; GO:0005634; GO:0003735; GO:0006412		SUBCELLULAR LOCATION: Cytoplasm {ECO:0000256|HAMAP-Rule:MF_03122}. Nucleus {ECO:0000256|HAMAP-Rule:MF_03122}. Note=Localized in cytoplasmic mRNP granules containing untranslated mRNAs. {ECO:0000256|HAMAP-Rule:MF_03122}.
A8K4Y7	NA	Evidence at protein level	GO:0003677; GO:0000786; GO:0005634		SUBCELLULAR LOCATION: Chromosome {ECO:0000256|SAAS:SAAS00597685}.; SUBCELLULAR LOCATION: Nucleus {ECO:0000256|SAAS:SAAS00597723}.
A8K521	NA	Evidence at transcript level	GO:0005524; GO:0003678; GO:0006270; GO:0003688; GO:0042555; GO:0051301; GO:0003682; GO:0005634		SUBCELLULAR LOCATION: Nucleus {ECO:0000256|SAAS:SAAS00534438}.
A8K568	NA	Evidence at transcript level	GO:0016829; GO:0003676; GO:0006388; GO:0000213; GO:0000214		SUBCELLULAR LOCATION: Nucleus {ECO:0000256|PIRNR:PIRNR011789}.
A8K5A9	NA	Evidence at transcript level	GO:0046872; GO:0003676; GO:0005634; GO:0003700; GO:0006351		SUBCELLULAR LOCATION: Nucleus {ECO:0000256|SAAS:SAAS00574784}.
A8K5H6	NA	Evidence at transcript level	GO:0035312; GO:0003677; GO:0006281; GO:0005634		SUBCELLULAR LOCATION: Nucleus {ECO:0000256|SAAS:SAAS00537425}.
A8K5V0	NA	Evidence at transcript level	GO:0005634; GO:0043565; GO:0003700		SUBCELLULAR LOCATION: Nucleus {ECO:0000256|RuleBase:RU000682}.
A8K5X3	NA	Evidence at transcript level	GO:0046872; GO:0003676; GO:0005634; GO:0003700; GO:0006351		SUBCELLULAR LOCATION: Nucleus {ECO:0000256|SAAS:SAAS00535819}.
A8K5Y1	NA	Evidence at transcript level	GO:0021954; GO:0005737; GO:0005874; GO:0001578		SUBCELLULAR LOCATION: Cytoplasm, cytoskeleton {ECO:0000256|RuleBase:RU000686}.
A8K670	NA	Evidence at transcript level	GO:0005737; GO:0005634; GO:0050999		SUBCELLULAR LOCATION: Cytoplasm {ECO:0000256|PIRNR:PIRNR023577}. Nucleus {ECO:0000256|PIRNR:PIRNR023577}.
A8K674	NA	Evidence at transcript level	GO:0005737		SUBCELLULAR LOCATION: Cytoplasm {ECO:0000256|SAAS:SAAS00544534}.
A8K6A2	NA	Evidence at transcript level	GO:0005634		SUBCELLULAR LOCATION: Nucleus {ECO:0000256|SAAS:SAAS00542127}.
A8K6I5	NA	Evidence at transcript level	GO:0003677; GO:0005737; GO:0005634; GO:0004871; GO:0003700; GO:0006351		SUBCELLULAR LOCATION: Cytoplasm {ECO:0000256|RuleBase:RU046415}.; SUBCELLULAR LOCATION: Nucleus {ECO:0000256|RuleBase:RU046415}.
A8K6P0	NA	Evidence at transcript level	GO:0003677; GO:0005737; GO:0005634; GO:0003700; GO:0005667; GO:0006351		SUBCELLULAR LOCATION: Nucleus {ECO:0000256|SAAS:SAAS00600858}.
A8K6P6	NA	Evidence at transcript level	GO:0000981; GO:0046872; GO:0003676; GO:0005634; GO:0006366		SUBCELLULAR LOCATION: Nucleus {ECO:0000256|SAAS:SAAS00535819}.
A8K720	NA	Evidence at transcript level	GO:0003677; GO:0005634; GO:0006355; GO:0006351		SUBCELLULAR LOCATION: Nucleus {ECO:0000256|RuleBase:RU000476, ECO:0000256|SAAS:SAAS00579852}.
A8K725	NA	Evidence at transcript level	GO:0005634; GO:0043565; GO:0003700		SUBCELLULAR LOCATION: Nucleus {ECO:0000256|SAAS:SAAS00594387}.
A8K7H4	NA	Evidence at transcript level	GO:0003677; GO:0006260; GO:0005634; GO:0000808		SUBCELLULAR LOCATION: Nucleus {ECO:0000256|PIRNR:PIRNR007858}.
A8K7L7	NA	Evidence at transcript level	GO:0005634; GO:0003708; GO:0043565; GO:0003707; GO:0006351; GO:0008270		SUBCELLULAR LOCATION: Nucleus {ECO:0000256|SAAS:SAAS00595767}.
A8K7N7	NA	Evidence at transcript level	GO:0046872; GO:0005634; GO:0043565; GO:0003700; GO:0006351		SUBCELLULAR LOCATION: Nucleus {ECO:0000256|SAAS:SAAS00582275}.
A8K7S5	KATNA1	Evidence at transcript level	GO:0005524; GO:0051301; GO:0005813; GO:0005737; GO:0005874; GO:0051013; GO:0008568; GO:0030496; GO:0007067; GO:0000922		SUBCELLULAR LOCATION: Cytoplasm {ECO:0000256|HAMAP-Rule:MF_03023}. Midbody {ECO:0000256|HAMAP-Rule:MF_03023}. Cytoplasm, cytoskeleton, microtubule organizing center, centrosome {ECO:0000256|HAMAP-Rule:MF_03023}. Cytoplasm, cytoskeleton, spindle pole {ECO:0000256|HAMAP-Rule:MF_03023}. Note=Predominantly cytoplasmic. Localized diffusely in the cytoplasm during the interphase. During metaphase is lo…
A8K7T0	KYNU	Evidence at transcript level	GO:0034354; GO:0097053; GO:0043420; GO:0005737; GO:0030429; GO:0030170; GO:0019805; GO:0006569		SUBCELLULAR LOCATION: Cytoplasm {ECO:0000256|HAMAP-Rule:MF_03017, ECO:0000256|PIRNR:PIRNR038800}.
A8K830	COLCA2	Evidence at transcript level	GO:0005737		SUBCELLULAR LOCATION: Cytoplasm {ECO:0000269|PubMed:24154973}.
A8K840	NA	Evidence at transcript level	GO:0005634; GO:0003708; GO:0043565; GO:0003707; GO:0006351; GO:0008270		SUBCELLULAR LOCATION: Nucleus {ECO:0000256|SAAS:SAAS00595767}.
A8K8A2	NA	Evidence at transcript level	GO:0046872; GO:0003676; GO:0005634; GO:0003700; GO:0006351		SUBCELLULAR LOCATION: Nucleus {ECO:0000256|SAAS:SAAS00574784}.
A8K8F3	NA	Evidence at transcript level	GO:0003824; GO:0008152; GO:0005634		SUBCELLULAR LOCATION: Nucleus {ECO:0000256|SAAS:SAAS00539527}.
A8K8K6	NA	Evidence at transcript level	GO:0046872; GO:0003676; GO:0005634; GO:0003700; GO:0006351		SUBCELLULAR LOCATION: Nucleus {ECO:0000256|SAAS:SAAS00574784}.
A8K8L0	NA	Evidence at transcript level	GO:0003824; GO:0008152; GO:0005634		SUBCELLULAR LOCATION: Nucleus {ECO:0000256|SAAS:SAAS00539527}.
A8K8P3	SFI1	Evidence at protein level	GO:0000086; GO:0005814; GO:0005829; GO:0010923; GO:0019902		SUBCELLULAR LOCATION: Cytoplasm, cytoskeleton, microtubule organizing center, centrosome, centriole {ECO:0000269|PubMed:14504268, ECO:0000269|PubMed:16956364}. Note=Localized close to the centriole.
A8K8Q0	NA	Evidence at transcript level	GO:0003677; GO:0005634		SUBCELLULAR LOCATION: Nucleus {ECO:0000256|RuleBase:RU000682}.
A8K8V0	ZNF785	Evidence at protein level	GO:0003677; GO:0046872; GO:0005634; GO:0006355; GO:0006351		SUBCELLULAR LOCATION: Nucleus {ECO:0000305}.
A8K946	NA	Evidence at transcript level	GO:0003723; GO:0004482; GO:0005634		SUBCELLULAR LOCATION: Nucleus {ECO:0000256|PIRNR:PIRNR028762}.
A8K984	NA	Evidence at transcript level	GO:0005524; GO:0000796; GO:0007076; GO:0005634		SUBCELLULAR LOCATION: Nucleus {ECO:0000256|PIRNR:PIRNR005719}.
A8K9J7	NA	Evidence at transcript level	GO:0003677; GO:0000786; GO:0005634		SUBCELLULAR LOCATION: Chromosome {ECO:0000256|SAAS:SAAS00565666}.; SUBCELLULAR LOCATION: Nucleus {ECO:0000256|RuleBase:RU000451, ECO:0000256|SAAS:SAAS00566189}.
A8K9Y5	NA	Evidence at transcript level	GO:0005524; GO:0001046; GO:0004386; GO:0005634; GO:0006355		SUBCELLULAR LOCATION: Nucleus {ECO:0000256|SAAS:SAAS00539054}.
A8KA05	EIF2C3	Evidence at transcript level	GO:0016442; GO:0000932; GO:0035198; GO:0035278; GO:0035068; GO:0072091		SUBCELLULAR LOCATION: Cytoplasm, P-body {ECO:0000256|HAMAP-Rule:MF_03032}.
A8KAF4	NA	Evidence at transcript level	GO:0030284; GO:0005634; GO:0043565; GO:0005496; GO:0003700; GO:0006351; GO:0008270		SUBCELLULAR LOCATION: Nucleus {ECO:0000256|PIRNR:PIRNR002527, ECO:0000256|SAAS:SAAS00595767}.
A8MPP1	DDX11L8	Evidence at protein level	GO:0005524; GO:0004003; GO:0003677; GO:0003723; GO:0006139; GO:0005730		SUBCELLULAR LOCATION: Nucleus, nucleolus {ECO:0000250}.
A8MQ14	ZNF850	Inferred from homology	GO:0003677; GO:0046872; GO:0005634; GO:0006355; GO:0006351		SUBCELLULAR LOCATION: Nucleus {ECO:0000250}.
A8MQ27	NEURL1B	Evidence at protein level	GO:0007219; GO:0005769; GO:0016874; GO:0016567; GO:0070086; GO:0008270		SUBCELLULAR LOCATION: Cytoplasm {ECO:0000269|PubMed:19723503}.
A8MT65	ZNF891	Evidence at transcript level	GO:0003677; GO:0046872; GO:0005634; GO:0006355; GO:0006351		SUBCELLULAR LOCATION: Nucleus {ECO:0000250}.
A8MT69	CENPX	Evidence at protein level	GO:0034080; GO:0003677; GO:0071821; GO:0043240; GO:0051301; GO:0000777; GO:0036297; GO:0051382; GO:0007067; GO:0005654; GO:0031398; GO:0031297; GO:0000712		SUBCELLULAR LOCATION: Nucleus. Chromosome, centromere. Chromosome, centromere, kinetochore. Note=Constitutively localizes to centromeres throughout the cell cycle, and to kinetochores during mitosis.
A8MTJ3	GNAT3	Evidence at transcript level	GO:0031683; GO:0001664; GO:0005525; GO:0003924; GO:0001669; GO:0007193; GO:0007188; GO:0016324; GO:0005930; GO:0005834; GO:0046872; GO:0005886; GO:0043234; GO:0006457; GO:0035094; GO:0050913; GO:0050916; GO:0050917; GO:0004871		SUBCELLULAR LOCATION: Cytoplasm {ECO:0000269|PubMed:8015379}. Note=Dual ditribution pattern; plasmalemmal pattern with apical region localization and cytosolic pattern with localization throughout the cytoplasm.
A8MTJ6	FOXI3	Evidence at transcript level	GO:0000981; GO:0005634; GO:0043565; GO:0006351		SUBCELLULAR LOCATION: Nucleus {ECO:0000305}.
A8MTQ0	NOTO	Evidence at transcript level	GO:0003677; GO:0060271; GO:0009953; GO:0009880; GO:0001947; GO:0030903; GO:0005634; GO:1902017; GO:0006355; GO:0006351		SUBCELLULAR LOCATION: Nucleus {ECO:0000255|PROSITE-ProRule:PRU00108}.
A8MTY0	ZNF724	Uncertain	GO:0000978; GO:0046872; GO:0005634; GO:0006355; GO:0006351		SUBCELLULAR LOCATION: Nucleus {ECO:0000305}.
A8MTZ0	BBIP1	Evidence at protein level	GO:0034464; GO:0005929; GO:0042384; GO:0005737; GO:0005829; GO:0015031; GO:0097500		SUBCELLULAR LOCATION: Cell projection, cilium {ECO:0000269|Ref.4}. Cytoplasm {ECO:0000269|Ref.4}. Note=Localizes inside the primary cilium but not at centriolar satellites.
A8MU46	SMTNL1	Evidence at protein level	GO:0031674; GO:0031430; GO:0043292; GO:0005737; GO:0045908; GO:0005634; GO:0045907		SUBCELLULAR LOCATION: Cytoplasm, myofibril {ECO:0000269|PubMed:18310078}. Cytoplasm, myofibril, sarcomere, I band {ECO:0000250}. Cytoplasm, myofibril, sarcomere, M line {ECO:0000250}. Nucleus {ECO:0000250}. Note=Colocalizes with MYH2. In its unphosphorylated state, localizes to the cytoplasm (By similarity). Phosphorylation at Ser-301 promotes translocation to the nucleus (By similarity). {ECO:00…
A8MUK1	USP17L5	Inferred from homology	GO:0006915; GO:0005783; GO:0005634; GO:0016579; GO:0036459; GO:0006511		SUBCELLULAR LOCATION: Nucleus {ECO:0000250}. Endoplasmic reticulum {ECO:0000250}.
A8MUP8	RARA	Evidence at protein level	GO:0015629; GO:0005737; GO:0005634; GO:0003708; GO:0043565; GO:0003707; GO:0006351; GO:0008270		SUBCELLULAR LOCATION: Nucleus {ECO:0000256|SAAS:SAAS00595767}.
A8MUV4	FOXP2	Evidence at protein level	GO:0005634; GO:0043565; GO:0003700; GO:0006351		SUBCELLULAR LOCATION: Nucleus {ECO:0000256|SAAS:SAAS00582275}.
A8MUV8	ZNF727	Uncertain	GO:0000978; GO:0046872; GO:0005634; GO:0006355; GO:0006351		SUBCELLULAR LOCATION: Nucleus {ECO:0000250}.
A8MUZ8	ZNF705G	Evidence at transcript level	GO:0003677; GO:0046872; GO:0005634; GO:0006355; GO:0006351		SUBCELLULAR LOCATION: Nucleus {ECO:0000305}.
A8MV65	VGLL3	Evidence at transcript level	GO:0005634; GO:0006355; GO:0006351		SUBCELLULAR LOCATION: Nucleus {ECO:0000250|UniProtKB:Q8N8G2}.
A8MVS1	ZNF705F	Inferred from homology	GO:0003677; GO:0046872; GO:0005634; GO:0006355; GO:0006351		SUBCELLULAR LOCATION: Nucleus {ECO:0000250}.
A8MVU1	NCF1C	Uncertain	GO:0043020; GO:0005829; GO:0055114; GO:0043325; GO:0045730; GO:0006801; GO:0016176; GO:0016175		SUBCELLULAR LOCATION: Cytoplasm {ECO:0000250}.
A8MVW5	HEPACAM2	Evidence at protein level	GO:0005794; GO:0000139; GO:0051301; GO:0005813; GO:0051297; GO:0016021; GO:0030496; GO:0007067; GO:0005819	SIGNAL 1 31 {ECO:0000255}.	SUBCELLULAR LOCATION: Golgi apparatus membrane {ECO:0000269|PubMed:19358830, ECO:0000269|PubMed:22864114}; Single-pass type I membrane protein {ECO:0000255}. Cytoplasm, cytoskeleton, spindle {ECO:0000269|PubMed:19358830, ECO:0000269|PubMed:22864114}. Cytoplasm, cytoskeleton, microtubule organizing center, centrosome {ECO:0000269|PubMed:19358830, ECO:0000269|PubMed:22864114}. Midbody {ECO:0000269|…	TRANSMEM 352 372 Helical. {ECO:0000255}.
A8MW95	BECN2	Evidence at protein level	GO:0032258; GO:1990172; GO:0000045; GO:0006914; GO:0006995; GO:0016023; GO:0008333; GO:0042593; GO:0045324; GO:0044804; GO:0034271; GO:0034272; GO:0000407		SUBCELLULAR LOCATION: Cytoplasm {ECO:0000305}.
A8MWA4	ZNF705E	Inferred from homology	GO:0003677; GO:0046872; GO:0005634; GO:0006355; GO:0006351		SUBCELLULAR LOCATION: Nucleus {ECO:0000305}.
A8MWD9	SNRPGP15	Uncertain	GO:0003723; GO:0000398; GO:0005732; GO:0005681		SUBCELLULAR LOCATION: Nucleus {ECO:0000250}.
A8MX39	ERG	Evidence at protein level	GO:0005634; GO:0043565; GO:0003700		SUBCELLULAR LOCATION: Nucleus {ECO:0000256|SAAS:SAAS00594387}.
A8MX75	ERCC2	Evidence at protein level	GO:0005524; GO:0004003; GO:0003677; GO:0006289; GO:0005634		SUBCELLULAR LOCATION: Nucleus {ECO:0000256|SAAS:SAAS00553264}.
A8MXP9	MATR3	Evidence at protein level	GO:0003676; GO:0005654; GO:0000166; GO:0008270		SUBCELLULAR LOCATION: Nucleus {ECO:0000256|SAAS:SAAS00591741}.
A8MXY4	ZNF99	Evidence at transcript level	GO:0003677; GO:0046872; GO:0005634; GO:0006355; GO:0006351		SUBCELLULAR LOCATION: Nucleus {ECO:0000305}.
A8MYV6	HIF1A	Evidence at protein level	GO:0005634; GO:0003700; GO:0006351		SUBCELLULAR LOCATION: Nucleus {ECO:0000256|SAAS:SAAS00600858}.
A8MYZ6	FOXO6	Evidence at protein level	GO:0000981; GO:0005737; GO:0005634; GO:0060999; GO:0006357; GO:0043565; GO:0006351		SUBCELLULAR LOCATION: Cytoplasm {ECO:0000250}. Nucleus {ECO:0000255|PROSITE-ProRule:PRU00089}. Note=When phosphorylated, translocated from nucleus to cytoplasm. High nuclear localization after stimulation with growth factors (By similarity). {ECO:0000250}.
A8MZ24	ERG	Evidence at protein level	GO:0005634; GO:0043565; GO:0003700		SUBCELLULAR LOCATION: Nucleus {ECO:0000256|SAAS:SAAS00594387}.
A8MZ59	LEUTX	Evidence at transcript level	GO:0005634; GO:0006355; GO:0043565		SUBCELLULAR LOCATION: Nucleus {ECO:0000255|PROSITE-ProRule:PRU00108}.
A9QM74	KPNA7	Evidence at protein level	GO:0006607; GO:0005829; GO:0075733; GO:0019054; GO:0008139; GO:0005643; GO:0005654; GO:0008565		SUBCELLULAR LOCATION: Nucleus {ECO:0000269|PubMed:20701745}.
A9UHW6	MIF4GD	Evidence at protein level	GO:0003723; GO:0005737; GO:0005730; GO:0008022; GO:0006417		SUBCELLULAR LOCATION: Cytoplasm {ECO:0000269|PubMed:18025107}. Nucleus {ECO:0000269|PubMed:18025107}.
A9YTQ3	AHRR	Evidence at protein level	GO:0003677; GO:0005737; GO:0005634; GO:0009410; GO:0006351; GO:0001191		SUBCELLULAR LOCATION: Cytoplasm {ECO:0000269|PubMed:17980155}. Nucleus {ECO:0000255|PROSITE-ProRule:PRU00981, ECO:0000269|PubMed:17980155}. Note=Predominantly in the nuclear compartment. First cytoplasmic, translocates into the nuclear compartment upon interaction with ARNT in the cytoplasmic compartment.
B0AZM1	NA	Evidence at transcript level	GO:0003677; GO:0005737; GO:0005634; GO:0003700; GO:0005667; GO:0006351		SUBCELLULAR LOCATION: Nucleus {ECO:0000256|SAAS:SAAS00600858}.
B0AZQ4	NA	Evidence at transcript level	GO:0005524; GO:0006281; GO:0003682; GO:0008280; GO:0007064; GO:0005634		SUBCELLULAR LOCATION: Nucleus {ECO:0000256|PIRNR:PIRNR005719}.
B0EXJ7	NA	Evidence at transcript level	GO:0003676; GO:0005634; GO:0008270		SUBCELLULAR LOCATION: Nucleus {ECO:0000256|SAAS:SAAS00591741}.
B0QXZ6	CBX6	Evidence at protein level	GO:0005634		SUBCELLULAR LOCATION: Nucleus {ECO:0000256|SAAS:SAAS00539527}.
B0QY89	EIF3L	Evidence at protein level	GO:0016282; GO:0033290; GO:0005852; GO:0001731; GO:0006446; GO:0003743		SUBCELLULAR LOCATION: Cytoplasm {ECO:0000256|HAMAP-Rule:MF_03011}.
B0QY90	EIF3L	Evidence at protein level	GO:0016282; GO:0033290; GO:0005852; GO:0001731; GO:0006446; GO:0003743		SUBCELLULAR LOCATION: Cytoplasm {ECO:0000256|HAMAP-Rule:MF_03011}.
B0QYA4	EIF3D	Evidence at protein level	GO:0005852; GO:0003743		SUBCELLULAR LOCATION: Cytoplasm {ECO:0000256|SAAS:SAAS00187789}.
B0QYA5	EIF3D	Evidence at protein level	GO:0005852; GO:0003743		SUBCELLULAR LOCATION: Cytoplasm {ECO:0000256|SAAS:SAAS00187789}.
B0QYA6	EIF3D	Evidence at protein level	GO:0005852; GO:0003743		SUBCELLULAR LOCATION: Cytoplasm {ECO:0000256|SAAS:SAAS00187789}.
B0QYA8	EIF3D	Evidence at protein level	GO:0005852; GO:0003743		SUBCELLULAR LOCATION: Cytoplasm {ECO:0000256|SAAS:SAAS00187789}.
B0QYP2	CBX7	Evidence at protein level	GO:0005634		SUBCELLULAR LOCATION: Nucleus {ECO:0000256|SAAS:SAAS00539527}.
B0QYV1	RBFOX2	Evidence at protein level	GO:0003723; GO:0008380; GO:0005737; GO:0006397; GO:0005654; GO:0000166; GO:0043484		SUBCELLULAR LOCATION: Nucleus {ECO:0000256|PIRNR:PIRNR037932}.
B0QYW7	ESR1	Evidence at protein level	GO:0005634; GO:0043565; GO:0043401; GO:0003700; GO:0006351; GO:0008270		SUBCELLULAR LOCATION: Nucleus {ECO:0000256|SAAS:SAAS00595767}.
B0QYY4	RBFOX2	Evidence at protein level	GO:0003723; GO:0008380; GO:0005737; GO:0006397; GO:0005654; GO:0000166; GO:0043484		SUBCELLULAR LOCATION: Nucleus {ECO:0000256|PIRNR:PIRNR037932}.
B0QZK4	HP1BP3	Evidence at protein level	GO:0003677; GO:0003682; GO:0070828; GO:0000786; GO:0006334; GO:0005634; GO:0006355		SUBCELLULAR LOCATION: Nucleus {ECO:0000256|RuleBase:RU003895}.
B0YJ74	PSMA8	Inferred from homology	GO:0005737; GO:0005634; GO:0019773; GO:0004298; GO:0006511		SUBCELLULAR LOCATION: Cytoplasm {ECO:0000256|RuleBase:RU000551}. Nucleus {ECO:0000256|RuleBase:RU000551}.; SUBCELLULAR LOCATION: Nucleus {ECO:0000256|SAAS:SAAS00594407}.
B0ZBF6	NR3C2	Evidence at protein level	GO:0005634; GO:0043565; GO:0043401; GO:0003700; GO:0006351; GO:0008270		SUBCELLULAR LOCATION: Nucleus {ECO:0000256|SAAS:SAAS00595767}.
B0ZBF8	NR3C2	Evidence at protein level	GO:0005634; GO:0043565; GO:0003700; GO:0006351; GO:0008270		SUBCELLULAR LOCATION: Nucleus {ECO:0000256|SAAS:SAAS00586772}.
B1AHB0	MCM5	Evidence at transcript level	GO:0005524; GO:0003678; GO:0006270; GO:0003688; GO:0042555; GO:0051301; GO:0003682; GO:0005654		SUBCELLULAR LOCATION: Nucleus {ECO:0000256|SAAS:SAAS00534438}.
B1AHB1	MCM5	Evidence at protein level	GO:0005524; GO:0003678; GO:0006270; GO:0003688; GO:0042555; GO:0051301; GO:0003682; GO:0005654		SUBCELLULAR LOCATION: Nucleus {ECO:0000256|SAAS:SAAS00534438}.
B1AK53	ESPN	Evidence at protein level	GO:0017124; GO:0051015; GO:0005903; GO:0005737; GO:0031941; GO:0007626; GO:0005902; GO:0051494; GO:0030046; GO:0051491; GO:0007605; GO:0032426		SUBCELLULAR LOCATION: Cytoplasm, cytoskeleton {ECO:0000250}. Cell projection, stereocilium {ECO:0000250}. Cell projection, microvillus {ECO:0000250}.
B1AKN3	RERE	Evidence at protein level	GO:0005634; GO:0043565; GO:0003700; GO:0008270		SUBCELLULAR LOCATION: Nucleus {ECO:0000256|SAAS:SAAS00548613}.
B1AKN5	NFIA	Evidence at protein level	GO:0003677; GO:0006260; GO:0030054; GO:0005654; GO:0003700; GO:0006351		SUBCELLULAR LOCATION: Nucleus {ECO:0000256|RuleBase:RU000690, ECO:0000256|SAAS:SAAS00573677}.
B1AKN6	NFIA	Evidence at protein level	GO:0003677; GO:0006260; GO:0005634; GO:0003700; GO:0006351		SUBCELLULAR LOCATION: Nucleus {ECO:0000256|RuleBase:RU000690, ECO:0000256|SAAS:SAAS00573677}.
B1AKN7	NFIA	Evidence at protein level	GO:0003677; GO:0006260; GO:0005654; GO:0003700; GO:0006351		SUBCELLULAR LOCATION: Nucleus {ECO:0000256|RuleBase:RU000690, ECO:0000256|SAAS:SAAS00573677}.
B1AKN8	NFIA	Evidence at protein level	GO:0003677; GO:0006260; GO:0030054; GO:0005654; GO:0003700; GO:0006351		SUBCELLULAR LOCATION: Nucleus {ECO:0000256|RuleBase:RU000690, ECO:0000256|SAAS:SAAS00573677}.
B1ANR0	PABPC4	Evidence at protein level	GO:0003723; GO:0005737; GO:0000166		SUBCELLULAR LOCATION: Cytoplasm {ECO:0000256|RuleBase:RU362004}.
B1APH4	ZNF487	Uncertain	GO:0003677; GO:0046872; GO:0005634; GO:0006355; GO:0006351		SUBCELLULAR LOCATION: Nucleus {ECO:0000305}.
B1B1I8	PAX6	Predicted	GO:0003677; GO:0007275; GO:0005634; GO:0006355; GO:0006351		SUBCELLULAR LOCATION: Nucleus {ECO:0000256|RuleBase:RU000491}.
B1B1I9	PAX6	Predicted	GO:0003677; GO:0007275; GO:0005634; GO:0006355; GO:0006351		SUBCELLULAR LOCATION: Nucleus {ECO:0000256|RuleBase:RU000491, ECO:0000256|SAAS:SAAS00117811}.
B1B1J0	PAX6	Predicted	GO:0003677; GO:0007275; GO:0005634; GO:0006355; GO:0006351		SUBCELLULAR LOCATION: Nucleus {ECO:0000256|RuleBase:RU000491, ECO:0000256|SAAS:SAAS00117811}.
B1B1S6	Pix-1	Evidence at transcript level	GO:0005634; GO:0006355; GO:0043565		SUBCELLULAR LOCATION: Nucleus {ECO:0000256|RuleBase:RU000682}.
B1PRL2	NA	Evidence at transcript level	GO:0005634; GO:0043565; GO:0003700		SUBCELLULAR LOCATION: Nucleus {ECO:0000256|SAAS:SAAS00594387}.
B2CNW3	ONECUT1	Evidence at transcript level	GO:0003677; GO:0005634		SUBCELLULAR LOCATION: Nucleus {ECO:0000256|RuleBase:RU000682}.
B2CW77	KLLN	Evidence at protein level	GO:0003677; GO:0006915; GO:0007050; GO:0005730; GO:0005634		SUBCELLULAR LOCATION: Nucleus {ECO:0000269|PubMed:18385383}.
B2R4D5	NA	Evidence at transcript level	GO:0034314; GO:0005885; GO:0005737		SUBCELLULAR LOCATION: Cytoplasm, cytoskeleton {ECO:0000256|PIRNR:PIRNR016315}.
B2R4P9	H3F3B	Evidence at transcript level	GO:0003677; GO:0007420; GO:0000786; GO:0005634; GO:0009725		SUBCELLULAR LOCATION: Chromosome {ECO:0000256|SAAS:SAAS00597685}.; SUBCELLULAR LOCATION: Nucleus {ECO:0000256|SAAS:SAAS00597723}.
B2R4R0	HIST1H4H	Evidence at transcript level	GO:0003677; GO:0006352; GO:0000786; GO:0006334; GO:0005634		SUBCELLULAR LOCATION: Chromosome {ECO:0000256|SAAS:SAAS00581170}.; SUBCELLULAR LOCATION: Nucleus {ECO:0000256|SAAS:SAAS00581157}.
B2R506	NA	Evidence at transcript level	GO:0006355; GO:0005672; GO:0006367		SUBCELLULAR LOCATION: Nucleus {ECO:0000256|PIRNR:PIRNR009415}.
B2R5B3	NA	Evidence at transcript level	GO:0003677; GO:0000786; GO:0005634		SUBCELLULAR LOCATION: Chromosome {ECO:0000256|SAAS:SAAS00534031}.; SUBCELLULAR LOCATION: Nucleus {ECO:0000256|RuleBase:RU000527, ECO:0000256|SAAS:SAAS00534029}.
B2R5B6	NA	Evidence at transcript level	GO:0003677; GO:0000786; GO:0005634		SUBCELLULAR LOCATION: Chromosome {ECO:0000256|SAAS:SAAS00534031}.; SUBCELLULAR LOCATION: Nucleus {ECO:0000256|RuleBase:RU000527, ECO:0000256|SAAS:SAAS00534029}.
B2R5U4	NA	Evidence at transcript level	GO:0005737; GO:0005634		SUBCELLULAR LOCATION: Cytoplasm {ECO:0000256|PIRNR:PIRNR011844}. Nucleus {ECO:0000256|PIRNR:PIRNR011844}.
B2R617	NA	Evidence at transcript level	GO:0005634; GO:0003700; GO:0006351		SUBCELLULAR LOCATION: Nucleus {ECO:0000256|SAAS:SAAS00600858}.
B2R680	NA	Evidence at transcript level	GO:0003677; GO:0005737; GO:0005634; GO:0004871; GO:0003700; GO:0006351		SUBCELLULAR LOCATION: Cytoplasm {ECO:0000256|RuleBase:RU046415}.; SUBCELLULAR LOCATION: Nucleus {ECO:0000256|RuleBase:RU046415}.
B2R681	NA	Evidence at transcript level	GO:0003677; GO:0005634; GO:0006355; GO:0006351		SUBCELLULAR LOCATION: Nucleus {ECO:0000256|RuleBase:RU000476, ECO:0000256|SAAS:SAAS00579852}.
B2R6D4	NA	Evidence at transcript level	GO:0009298; GO:0005737; GO:0004615		SUBCELLULAR LOCATION: Cytoplasm {ECO:0000256|RuleBase:RU361118}.
B2R6L0	NA	Evidence at transcript level	GO:0005525; GO:0003924; GO:0005737; GO:0005874; GO:0007017; GO:0005200		SUBCELLULAR LOCATION: Cytoplasm, cytoskeleton {ECO:0000256|SAAS:SAAS00045381}.
B2R6S5	NA	Evidence at transcript level	GO:0006207; GO:0005524; GO:0004127; GO:0005737; GO:0005634; GO:0006221; GO:0009041	SIGNAL 1 24 {ECO:0000256|SAM:SignalP}.	SUBCELLULAR LOCATION: Nucleus {ECO:0000256|HAMAP-Rule:MF_03172}. Cytoplasm {ECO:0000256|HAMAP-Rule:MF_03172}. Note=Predominantly nuclear. {ECO:0000256|HAMAP-Rule:MF_03172}.
B2R6Y1	NA	Evidence at transcript level	GO:0003677; GO:0000786; GO:0005634		SUBCELLULAR LOCATION: Chromosome {ECO:0000256|SAAS:SAAS00597685}.; SUBCELLULAR LOCATION: Nucleus {ECO:0000256|SAAS:SAAS00597723}.
B2R7C0	NA	Evidence at transcript level	GO:0005634; GO:0043565; GO:0003707; GO:0003700; GO:0006351; GO:0008270		SUBCELLULAR LOCATION: Nucleus {ECO:0000256|SAAS:SAAS00595767}.
B2R7C5	NA	Evidence at transcript level	GO:0005524; GO:0003677; GO:0003678; GO:0006270; GO:0042555; GO:0005634		SUBCELLULAR LOCATION: Nucleus {ECO:0000256|SAAS:SAAS00534438}.
B2R7F1	NA	Evidence at transcript level	GO:0005634; GO:0043565; GO:0003707; GO:0004887; GO:0006351; GO:0008270		SUBCELLULAR LOCATION: Nucleus {ECO:0000256|SAAS:SAAS00595767}.
B2R870	NA	Evidence at transcript level	GO:0003677; GO:0005634		SUBCELLULAR LOCATION: Nucleus {ECO:0000256|RuleBase:RU000682, ECO:0000256|SAAS:SAAS00544279}.
B2R8A7	NA	Evidence at transcript level	GO:0004402; GO:0005634; GO:0006355		SUBCELLULAR LOCATION: Nucleus {ECO:0000256|RuleBase:RU361211}.
B2R8B9	NA	Evidence at transcript level	GO:0005634; GO:0043565; GO:0003707; GO:0003700; GO:0006351; GO:0008270		SUBCELLULAR LOCATION: Nucleus {ECO:0000256|SAAS:SAAS00595767}.
B2R8C8	NA	Evidence at transcript level	GO:0000045; GO:0005737		SUBCELLULAR LOCATION: Cytoplasm {ECO:0000256|RuleBase:RU361201}.
B2R8X4	NA	Evidence at transcript level	GO:0005634; GO:0043565; GO:0003700		SUBCELLULAR LOCATION: Nucleus {ECO:0000256|SAAS:SAAS00594387}.
B2R940	NA	Evidence at transcript level	GO:0003677; GO:0005634; GO:0009887; GO:0003700; GO:0006351		SUBCELLULAR LOCATION: Nucleus {ECO:0000256|RuleBase:RU000491, ECO:0000256|SAAS:SAAS00117811}.
B2R968	NA	Evidence at transcript level	GO:0046872; GO:0003676; GO:0005634; GO:0003700; GO:0006351		SUBCELLULAR LOCATION: Nucleus {ECO:0000256|SAAS:SAAS00535819}.
B2R984	NA	Evidence at transcript level	GO:0003677; GO:0000786; GO:0006334; GO:0005634		SUBCELLULAR LOCATION: Chromosome {ECO:0000256|SAAS:SAAS00569684}.; SUBCELLULAR LOCATION: Nucleus {ECO:0000256|RuleBase:RU003895, ECO:0000256|SAAS:SAAS00569685}.
B2R9K5	NA	Evidence at transcript level	GO:0000469; GO:0005730		SUBCELLULAR LOCATION: Nucleus, nucleolus {ECO:0000256|SAAS:SAAS00371333}.
B2R9K8	NA	Evidence at transcript level	GO:0005524; GO:0005737; GO:0006457		SUBCELLULAR LOCATION: Cytoplasm {ECO:0000256|SAAS:SAAS00547836}.
B2R9M7	NA	Evidence at transcript level	GO:0005524; GO:0004699; GO:0007155; GO:0007049; GO:0051301; GO:0005856; GO:0035556; GO:0046872; GO:0005634; GO:0048471; GO:0005886		SUBCELLULAR LOCATION: Cytoplasm {ECO:0000256|PIRNR:PIRNR000551}. Cytoplasm, cytoskeleton {ECO:0000256|PIRNR:PIRNR000551}. Cell membrane {ECO:0000256|PIRNR:PIRNR000551}. Cytoplasm, perinuclear region {ECO:0000256|PIRNR:PIRNR000551}. Nucleus {ECO:0000256|PIRNR:PIRNR000551}. Note=Translocated to plasma membrane in epithelial cells stimulated by HGF. Associated with the Golgi at the perinuclear site …
B2R9U5	NA	Evidence at transcript level	GO:0005634; GO:0006355; GO:0043565		SUBCELLULAR LOCATION: Nucleus {ECO:0000256|RuleBase:RU000682, ECO:0000256|SAAS:SAAS00544279}.
B2RA15	NA	Evidence at transcript level	GO:0003682; GO:0016568; GO:0008285; GO:0005634; GO:0043065; GO:0008270		SUBCELLULAR LOCATION: Nucleus {ECO:0000256|RuleBase:RU361213}.
B2RAH5	NA	Evidence at transcript level	GO:0005737; GO:0019208; GO:0007165		SUBCELLULAR LOCATION: Cytoplasm {ECO:0000256|PIRNR:PIRNR038141}.
B2RAQ9	NA	Evidence at transcript level	GO:0005737; GO:0005634; GO:0005839; GO:0051603; GO:0004298		SUBCELLULAR LOCATION: Cytoplasm {ECO:0000256|RuleBase:RU000694}. Nucleus {ECO:0000256|RuleBase:RU000694}.; SUBCELLULAR LOCATION: Nucleus {ECO:0000256|SAAS:SAAS00551005}.
B2RAT9	NA	Evidence at transcript level	GO:0046872; GO:0003676; GO:0005634; GO:0003700; GO:0006351		SUBCELLULAR LOCATION: Nucleus {ECO:0000256|SAAS:SAAS00574784}.
B2RAZ0	NA	Evidence at transcript level	GO:0005254; GO:0034707; GO:0005737; GO:0005244		SUBCELLULAR LOCATION: Membrane {ECO:0000256|RuleBase:RU362009}; Single-pass membrane protein {ECO:0000256|RuleBase:RU362009}. Cytoplasm {ECO:0000256|RuleBase:RU362009}.
B2RB72	NA	Evidence at transcript level	GO:0003676; GO:0005634; GO:0008270		SUBCELLULAR LOCATION: Nucleus {ECO:0000256|SAAS:SAAS00591741}.
B2RBA6	MCM7	Evidence at transcript level	GO:0005524; GO:0003677; GO:0003678; GO:0006270; GO:0042555; GO:0005634		SUBCELLULAR LOCATION: Nucleus {ECO:0000256|SAAS:SAAS00534438}.
B2RBD5	NA	Evidence at transcript level	GO:0005525; GO:0003924; GO:0005737; GO:0005874; GO:0007017; GO:0005200		SUBCELLULAR LOCATION: Cytoplasm, cytoskeleton {ECO:0000256|SAAS:SAAS00045381}.
B2RBI6	NA	Evidence at transcript level	GO:0005634; GO:0006355; GO:0006351		SUBCELLULAR LOCATION: Nucleus {ECO:0000256|SAAS:SAAS00600858}.
B2RBI8	NA	Evidence at transcript level	GO:0003677; GO:0046872; GO:0005634		SUBCELLULAR LOCATION: Nucleus {ECO:0000256|RuleBase:RU000682}.
B2RBM8	NA	Evidence at transcript level	GO:0003677; GO:0046872; GO:0005634		SUBCELLULAR LOCATION: Nucleus {ECO:0000256|RuleBase:RU000682}.
B2RC57	NA	Evidence at transcript level	GO:0003677; GO:0005634; GO:0006355		SUBCELLULAR LOCATION: Nucleus {ECO:0000256|SAAS:SAAS00563020}.
B2RCL8	NA	Evidence at transcript level	GO:0003677; GO:0005737; GO:0005634; GO:0003700; GO:0005667; GO:0006351		SUBCELLULAR LOCATION: Nucleus {ECO:0000256|SAAS:SAAS00600858}.
B2RD01	CENPBD1	Evidence at transcript level	GO:0003677; GO:0005634		SUBCELLULAR LOCATION: Nucleus {ECO:0000255|PROSITE-ProRule:PRU00320, ECO:0000255|PROSITE-ProRule:PRU00583}.
B2RD51	NA	Evidence at transcript level	GO:0005783; GO:0043248		SUBCELLULAR LOCATION: Cytoplasm {ECO:0000256|PIRNR:PIRNR010076}.
B2RDD7	NA	Evidence at transcript level	GO:0005829; GO:0008469; GO:0005634		SUBCELLULAR LOCATION: Cytoplasm {ECO:0000256|PIRNR:PIRNR015894}.; SUBCELLULAR LOCATION: Nucleus {ECO:0000256|PIRNR:PIRNR015894}.
B2RDF2	PES1	Evidence at transcript level	GO:0070545; GO:0000793; GO:0005737; GO:0000466; GO:0000463; GO:0005730; GO:0007000; GO:0005654; GO:0005634; GO:0030687; GO:0033365; GO:0043021		SUBCELLULAR LOCATION: Nucleus, nucleolus {ECO:0000256|HAMAP-Rule:MF_03028}. Nucleus, nucleoplasm {ECO:0000256|HAMAP-Rule:MF_03028}. Chromosome {ECO:0000256|HAMAP-Rule:MF_03028}. Note=Appears to localize to the periphery of metaphase chromosomes during mitosis and to the prenucleolar bodies that form in mitotic cells prior to the actual nucleoli. {ECO:0000256|HAMAP-Rule:MF_03028}.; SUBCELLULAR LOC…
B2RDG0	NA	Evidence at transcript level	GO:0005737; GO:0005634; GO:0019773; GO:0004298; GO:0006511		SUBCELLULAR LOCATION: Cytoplasm {ECO:0000256|RuleBase:RU000551}. Nucleus {ECO:0000256|RuleBase:RU000551}.; SUBCELLULAR LOCATION: Nucleus {ECO:0000256|SAAS:SAAS00594407}.
B2RDN3	NUBP2	Evidence at transcript level	GO:0051539; GO:0005524; GO:0005737; GO:0016226; GO:0046872; GO:0005815; GO:0005634		SUBCELLULAR LOCATION: Nucleus {ECO:0000256|HAMAP-Rule:MF_03039}. Cytoplasm, cytoskeleton, microtubule organizing center, centrosome {ECO:0000256|HAMAP-Rule:MF_03039}. Note=Enriched at the centrosomes during mitosis. {ECO:0000256|HAMAP-Rule:MF_03039}.
B2RDN4	BOP1	Evidence at transcript level	GO:0000466; GO:0000463; GO:0005730; GO:0005654; GO:0030687; GO:0043021		SUBCELLULAR LOCATION: Nucleus, nucleolus {ECO:0000256|HAMAP-Rule:MF_03027}. Nucleus, nucleoplasm {ECO:0000256|HAMAP-Rule:MF_03027}.; SUBCELLULAR LOCATION: Nucleus, nucleoplasm {ECO:0000256|SAAS:SAAS00535448}.
B2RDP6	NA	Evidence at transcript level	GO:0005634		SUBCELLULAR LOCATION: Nucleus {ECO:0000256|SAAS:SAAS00542127}.
B2RDT1	NA	Evidence at transcript level	GO:0004879; GO:0005634; GO:0043565; GO:0003707; GO:0006351; GO:0008270		SUBCELLULAR LOCATION: Nucleus {ECO:0000256|SAAS:SAAS00595767}.
B2RE94	EEF1AKMT1	Evidence at transcript level	GO:0005737; GO:0003676; GO:0016279		SUBCELLULAR LOCATION: Cytoplasm {ECO:0000256|HAMAP-Rule:MF_03187}.
B2RNT0	EBF2	Evidence at transcript level	GO:0003677; GO:0046872; GO:0007275; GO:0005634; GO:0006355; GO:0006351		SUBCELLULAR LOCATION: Nucleus {ECO:0000256|RuleBase:RU004489}.
B2RPK0	HMGB1P1	Uncertain	GO:0003677; GO:0005694; GO:0006954; GO:0005634		SUBCELLULAR LOCATION: Nucleus {ECO:0000255|PROSITE-ProRule:PRU00267}. Chromosome {ECO:0000250}.
B2RWN8	MYST4	Evidence at transcript level	GO:0003677; GO:0004402; GO:0000786; GO:0006334; GO:0005634; GO:0006355; GO:0008270		SUBCELLULAR LOCATION: Nucleus {ECO:0000256|RuleBase:RU361211}.
B2RWP5	NSD1	Evidence at transcript level	GO:0018024; GO:0005634; GO:0008270		SUBCELLULAR LOCATION: Nucleus {ECO:0000256|SAAS:SAAS00574581}.
B2RXF5	ZBTB42	Evidence at protein level	GO:0003677; GO:0005737; GO:0046872; GO:0007517; GO:0000122; GO:0005654; GO:0005634; GO:0005886; GO:0006351		SUBCELLULAR LOCATION: Cytoplasm {ECO:0000250|UniProtKB:Q811H0}. Nucleus {ECO:0000269|PubMed:21193930}. Nucleus, nucleoplasm {ECO:0000250|UniProtKB:Q811H0}. Note=In skeletal myofibers, highly enriched in subsynaptic nuclei at the neuromuscular junctions. {ECO:0000250|UniProtKB:Q811H0}.
B2RXH2	KDM4E	Evidence at protein level	GO:0016568; GO:0051213; GO:0046872; GO:0005634; GO:0006355; GO:0006351		SUBCELLULAR LOCATION: Nucleus {ECO:0000255|PROSITE-ProRule:PRU00537}.
B2RXH8	HNRNPCL2	Evidence at transcript level	GO:0003723; GO:0030529; GO:0000166; GO:0005634		SUBCELLULAR LOCATION: Nucleus {ECO:0000250}. Note=Component of ribonucleosomes. {ECO:0000250}.
B2ZAH2	NA	Inferred from homology	GO:0006915; GO:0007049; GO:0005737; GO:0046872; GO:0005634; GO:0003700; GO:0044212; GO:0006351		SUBCELLULAR LOCATION: Cytoplasm {ECO:0000256|RuleBase:RU003304}. Nucleus {ECO:0000256|RuleBase:RU003304}.
B3EWF7	EPM2A	Evidence at protein level	GO:0032007; GO:0005634; GO:0016239		SUBCELLULAR LOCATION: Nucleus {ECO:0000269|PubMed:22036712}.
B3KM87	MATR3	Evidence at protein level	GO:0003676; GO:0000166; GO:0005634; GO:0008270		SUBCELLULAR LOCATION: Nucleus {ECO:0000256|SAAS:SAAS00591741}.
B3KMB1	NA	Evidence at transcript level	GO:0005524; GO:0000796; GO:0007076; GO:0005634		SUBCELLULAR LOCATION: Nucleus {ECO:0000256|PIRNR:PIRNR005719}.
B3KMC8	NA	Evidence at transcript level	GO:0003676; GO:0005634; GO:0008270		SUBCELLULAR LOCATION: Nucleus {ECO:0000256|SAAS:SAAS00591741}.
B3KMS8	NA	Evidence at transcript level	GO:0005634; GO:0016706; GO:0008270		SUBCELLULAR LOCATION: Nucleus {ECO:0000256|SAAS:SAAS00575847}.
B3KMV2	NA	Evidence at transcript level	GO:0006044; GO:0005975; GO:0005737; GO:0004342; GO:0016787		SUBCELLULAR LOCATION: Cytoplasm {ECO:0000256|RuleBase:RU361197}.
B3KMX0	NA	Evidence at transcript level	GO:0005524; GO:0003677; GO:0003678; GO:0006270; GO:0042555; GO:0005634		SUBCELLULAR LOCATION: Nucleus {ECO:0000256|SAAS:SAAS00534438}.
B3KN61	NA	Evidence at transcript level	GO:0046872; GO:0003676; GO:0005634; GO:0003700; GO:0006351		SUBCELLULAR LOCATION: Nucleus {ECO:0000256|SAAS:SAAS00574784}.
B3KN91	FTSJ1	Evidence at transcript level	GO:0005737; GO:0002181; GO:0008175; GO:0002128		SUBCELLULAR LOCATION: Cytoplasm {ECO:0000256|HAMAP-Rule:MF_03162}.
B3KND4	NA	Evidence at transcript level	GO:0030126; GO:0006886; GO:0005198; GO:0016192		SUBCELLULAR LOCATION: Cytoplasm {ECO:0000256|PIRNR:PIRNR037093}. Golgi apparatus membrane {ECO:0000256|PIRNR:PIRNR037093}; Peripheral membrane protein {ECO:0000256|PIRNR:PIRNR037093}; Cytoplasmic side {ECO:0000256|PIRNR:PIRNR037093}. Cytoplasmic vesicle, COPI-coated vesicle membrane {ECO:0000256|PIRNR:PIRNR037093}; Peripheral membrane protein {ECO:0000256|PIRNR:PIRNR037093}; Cytoplasmic side {ECO…
B3KNJ5	NA	Evidence at transcript level	GO:0005634; GO:0006355; GO:0043565; GO:0008270		SUBCELLULAR LOCATION: Nucleus {ECO:0000256|RuleBase:RU000682, ECO:0000256|SAAS:SAAS00397436}.
B3KNJ7	NA	Evidence at transcript level	GO:0007275; GO:0005634; GO:0043565; GO:0003700		SUBCELLULAR LOCATION: Nucleus {ECO:0000256|RuleBase:RU000682, ECO:0000256|SAAS:SAAS00544279}.
B3KNK8	NA	Evidence at transcript level	GO:0046872; GO:0003676; GO:0005634; GO:0003700; GO:0006351		SUBCELLULAR LOCATION: Nucleus {ECO:0000256|SAAS:SAAS00574784}.
B3KNL2	RUVBL2	Evidence at transcript level	GO:0005524; GO:0043141; GO:0006310; GO:0006281; GO:0005634; GO:0006355; GO:0006351		SUBCELLULAR LOCATION: Nucleus {ECO:0000256|RuleBase:RU363048, ECO:0000256|SAAS:SAAS00339597}.
B3KNP9	NA	Evidence at transcript level	GO:0046872; GO:0003676; GO:0005634; GO:0003700; GO:0006351		SUBCELLULAR LOCATION: Nucleus {ECO:0000256|SAAS:SAAS00574784}.
B3KNX6	NA	Evidence at transcript level	GO:0003677; GO:0030154; GO:0007399; GO:0005634; GO:0006355; GO:0006351		SUBCELLULAR LOCATION: Nucleus {ECO:0000256|PIRNR:PIRNR015618}.
B3KNZ4	EIF3C	Evidence at transcript level	GO:0016282; GO:0033290; GO:0005852; GO:0001731; GO:0006446; GO:0003743		SUBCELLULAR LOCATION: Cytoplasm {ECO:0000256|HAMAP-Rule:MF_03002, ECO:0000256|SAAS:SAAS00535949}.
B3KP81	MEIS2	Evidence at transcript level	GO:0003677; GO:0005634; GO:0006355		SUBCELLULAR LOCATION: Nucleus {ECO:0000256|SAAS:SAAS00563020}.
B3KPB9	EIF3L	Evidence at transcript level	GO:0016282; GO:0033290; GO:0005852; GO:0001731; GO:0006446; GO:0003743		SUBCELLULAR LOCATION: Cytoplasm {ECO:0000256|HAMAP-Rule:MF_03011}.
B3KPC1	NA	Evidence at transcript level	GO:0071025; GO:0005737; GO:0004519; GO:0046872; GO:0070966; GO:0070481; GO:0005634		SUBCELLULAR LOCATION: Nucleus {ECO:0000256|RuleBase:RU362019}. Cytoplasm {ECO:0000256|RuleBase:RU362019}.
B3KPD8	NA	Evidence at transcript level	GO:0003677; GO:0005634; GO:0006355		SUBCELLULAR LOCATION: Nucleus {ECO:0000256|SAAS:SAAS00563020}.
B3KPI0	NA	Evidence at transcript level	GO:0003677; GO:0046872; GO:0005634; GO:0006355; GO:0006366		SUBCELLULAR LOCATION: Nucleus {ECO:0000256|PIRNR:PIRNR037161}.
B3KPN8	NA	Evidence at transcript level	GO:0007275; GO:0005634; GO:0043565; GO:0003700		SUBCELLULAR LOCATION: Nucleus {ECO:0000256|RuleBase:RU000682, ECO:0000256|SAAS:SAAS00544279}.
B3KPQ9	NA	Evidence at transcript level	GO:0003677; GO:0005634; GO:0006355; GO:0006351		SUBCELLULAR LOCATION: Nucleus {ECO:0000256|RuleBase:RU361129}.
B3KPS3	NA	Evidence at transcript level	GO:0005525; GO:0003924; GO:0005737; GO:0005874; GO:0007017; GO:0005200		SUBCELLULAR LOCATION: Cytoplasm, cytoskeleton {ECO:0000256|SAAS:SAAS00392180}.
B3KQ23	MEF2B	Evidence at transcript level	GO:0003677; GO:0005634; GO:0006355; GO:0006351		SUBCELLULAR LOCATION: Nucleus {ECO:0000256|RuleBase:RU000476, ECO:0000256|SAAS:SAAS00579852}.
B3KQ42	NA	Evidence at transcript level	GO:0000981; GO:0046872; GO:0003676; GO:0005634; GO:0006351		SUBCELLULAR LOCATION: Nucleus {ECO:0000256|SAAS:SAAS00535819}.
B3KQB8	NA	Evidence at transcript level	GO:0003677; GO:0005634; GO:0006355; GO:0006351		SUBCELLULAR LOCATION: Nucleus {ECO:0000256|SAAS:SAAS00573650}.
B3KQG1	NA	Evidence at transcript level	GO:0007275; GO:0005634; GO:0006355; GO:0043565; GO:0006351		SUBCELLULAR LOCATION: Nucleus {ECO:0000256|RuleBase:RU000491, ECO:0000256|SAAS:SAAS00117811}.
B3KQM3	NA	Evidence at transcript level	GO:0005524; GO:0002250; GO:0005737; GO:0045087; GO:0043065; GO:0004674		SUBCELLULAR LOCATION: Cytoplasm {ECO:0000256|PIRNR:PIRNR037921}.
B3KRD4	NA	Evidence at transcript level	GO:0005524; GO:0008026; GO:0003677; GO:0005634		SUBCELLULAR LOCATION: Nucleus {ECO:0000256|SAAS:SAAS00539527}.
B3KRD9	NA	Evidence at transcript level	GO:0003677; GO:0005634; GO:0003700; GO:0006351		SUBCELLULAR LOCATION: Nucleus {ECO:0000256|SAAS:SAAS00353240}.
B3KRE9	NA	Evidence at transcript level	GO:0005634; GO:0043565; GO:0003700; GO:0006351		SUBCELLULAR LOCATION: Nucleus {ECO:0000256|RuleBase:RU361194, ECO:0000256|SAAS:SAAS00553137}.
B3KRG6	NA	Evidence at transcript level	GO:0003677; GO:0005634; GO:0006355; GO:0003707; GO:0006351		SUBCELLULAR LOCATION: Nucleus {ECO:0000256|SAAS:SAAS00595767}.
B3KRS1	NA	Evidence at transcript level	GO:0005737; GO:0005874; GO:0007020; GO:0005815; GO:0000922		SUBCELLULAR LOCATION: Cytoplasm, cytoskeleton, microtubule organizing center {ECO:0000256|RuleBase:RU363050}.
B3KRS7	NA	Evidence at transcript level	GO:0005524; GO:0043141; GO:0006310; GO:0006281; GO:0005634; GO:0006355; GO:0006351		SUBCELLULAR LOCATION: Nucleus {ECO:0000256|RuleBase:RU363048, ECO:0000256|SAAS:SAAS00339597}.
B3KRZ3	IMPDH	Evidence at transcript level	GO:0006177; GO:0003938; GO:0005737; GO:0046872; GO:0000166; GO:0005634		SUBCELLULAR LOCATION: Cytoplasm {ECO:0000256|HAMAP-Rule:MF_03156}. Nucleus {ECO:0000256|HAMAP-Rule:MF_03156}.
B3KS10	NA	Evidence at transcript level	GO:0005634		SUBCELLULAR LOCATION: Nucleus {ECO:0000256|SAAS:SAAS00539527}.
B3KS98	EIF3H	Evidence at protein level	GO:0016282; GO:0033290; GO:0005852; GO:0001731; GO:0003743		SUBCELLULAR LOCATION: Cytoplasm {ECO:0000256|HAMAP-Rule:MF_03007}.
B3KSH1	EIF3F	Evidence at transcript level	GO:0016282; GO:0033290; GO:0005852; GO:0001731; GO:0006446; GO:0003743		SUBCELLULAR LOCATION: Cytoplasm {ECO:0000256|HAMAP-Rule:MF_03005, ECO:0000256|SAAS:SAAS00003543}.
B3KT06	NA	Evidence at transcript level	GO:0005525; GO:0003924; GO:0005737; GO:0005874; GO:0007017; GO:0005200		SUBCELLULAR LOCATION: Cytoplasm, cytoskeleton {ECO:0000256|SAAS:SAAS00392180}.
B3KT27	NA	Evidence at transcript level	GO:0005634		SUBCELLULAR LOCATION: Nucleus {ECO:0000256|SAAS:SAAS00539527}.
B3KT91	NA	Evidence at transcript level	GO:0003677; GO:0005634; GO:0003700; GO:0006351		SUBCELLULAR LOCATION: Nucleus {ECO:0000256|RuleBase:RU361194, ECO:0000256|SAAS:SAAS00553137}.
B3KT93	NA	Evidence at transcript level	GO:0003723; GO:0005737; GO:0000166		SUBCELLULAR LOCATION: Cytoplasm {ECO:0000256|RuleBase:RU362004}.
B3KTA3	NA	Evidence at transcript level	GO:0007015; GO:0016477; GO:0005737; GO:0005856		SUBCELLULAR LOCATION: Cytoplasm, cytoskeleton {ECO:0000256|PIRNR:PIRNR005682}.
B3KTA4	NA	Evidence at transcript level	GO:0046872; GO:0003676; GO:0005634; GO:0003700; GO:0006351		SUBCELLULAR LOCATION: Nucleus {ECO:0000256|SAAS:SAAS00574784}.
B3KTH8	NA	Evidence at transcript level	GO:0005634; GO:0043565; GO:0003700; GO:0006351		SUBCELLULAR LOCATION: Nucleus {ECO:0000256|RuleBase:RU361194, ECO:0000256|SAAS:SAAS00553137}.
B3KTM0	NA	Evidence at transcript level	GO:0005737; GO:0005874		SUBCELLULAR LOCATION: Cytoplasm, cytoskeleton {ECO:0000256|RuleBase:RU000686}.
B3KTR3	NA	Evidence at transcript level	GO:0006915; GO:0005254; GO:0034707; GO:0005737; GO:0005244		SUBCELLULAR LOCATION: Membrane {ECO:0000256|RuleBase:RU362009}; Single-pass membrane protein {ECO:0000256|RuleBase:RU362009}. Cytoplasm {ECO:0000256|RuleBase:RU362009}.
B3KTU7	TUBGCP2	Evidence at protein level	GO:0005813; GO:0005737; GO:0005874; GO:0007020; GO:0005654; GO:0000922		SUBCELLULAR LOCATION: Cytoplasm, cytoskeleton, microtubule organizing center {ECO:0000256|RuleBase:RU363050}.
B3KTZ6	NA	Evidence at transcript level	GO:0005730; GO:0005654; GO:0006364		SUBCELLULAR LOCATION: Nucleus, nucleolus {ECO:0000256|SAAS:SAAS00560967}.; SUBCELLULAR LOCATION: Nucleus, nucleoplasm {ECO:0000256|SAAS:SAAS00560968}.
B3KU58	NA	Evidence at transcript level	GO:0046872; GO:0003676; GO:0005634; GO:0003700; GO:0006351		SUBCELLULAR LOCATION: Nucleus {ECO:0000256|SAAS:SAAS00574784}.
B3KUJ5	NA	Evidence at transcript level	GO:0032041; GO:0005634; GO:0006355; GO:0006351		SUBCELLULAR LOCATION: Nucleus {ECO:0000256|PIRNR:PIRNR037913}.
B3KUL8	NA	Evidence at transcript level	GO:0003677; GO:0005634; GO:0003700; GO:0006351		SUBCELLULAR LOCATION: Nucleus {ECO:0000256|SAAS:SAAS00353240}.
B3KUU9	NA	Evidence at transcript level	GO:0004879; GO:0005634; GO:0043565; GO:0003707; GO:0006351; GO:0008270		SUBCELLULAR LOCATION: Nucleus {ECO:0000256|SAAS:SAAS00595767}.
B3KUX3	NA	Evidence at transcript level	GO:0005634; GO:0003708; GO:0043565; GO:0003707; GO:0006351; GO:0008270		SUBCELLULAR LOCATION: Nucleus {ECO:0000256|SAAS:SAAS00595767}.
B3KUX4	NA	Evidence at transcript level	GO:0003677; GO:0005634; GO:0006355		SUBCELLULAR LOCATION: Nucleus {ECO:0000256|SAAS:SAAS00563020}.
B3KV37	NA	Evidence at transcript level	GO:0005634; GO:0043565; GO:0003707; GO:0003700; GO:0006351; GO:0008270		SUBCELLULAR LOCATION: Nucleus {ECO:0000256|SAAS:SAAS00595767}.
B3KV94	KDM5B	Evidence at protein level	GO:0005737; GO:0005634; GO:0016706; GO:0008270		SUBCELLULAR LOCATION: Nucleus {ECO:0000256|SAAS:SAAS00575847}.
B3KVC3	NA	Evidence at transcript level	GO:0005737; GO:0005634; GO:0005839; GO:0051603; GO:0004298		SUBCELLULAR LOCATION: Cytoplasm {ECO:0000256|RuleBase:RU000694}. Nucleus {ECO:0000256|RuleBase:RU000694}.; SUBCELLULAR LOCATION: Nucleus {ECO:0000256|SAAS:SAAS00551005}.
B3KVF0	NA	Evidence at transcript level	GO:0005524; GO:0003678; GO:0006270; GO:0003688; GO:0042555; GO:0003682; GO:0005634		SUBCELLULAR LOCATION: Nucleus {ECO:0000256|SAAS:SAAS00534438}.
B3KVJ2	NA	Evidence at transcript level	GO:0004402; GO:0005634; GO:0003700; GO:0008270		SUBCELLULAR LOCATION: Nucleus {ECO:0000256|RuleBase:RU361211}.
B3KVM5	NA	Evidence at transcript level	GO:0003677; GO:0005634; GO:0006355; GO:0003707; GO:0006351		SUBCELLULAR LOCATION: Nucleus {ECO:0000256|SAAS:SAAS00595767}.
B3KVU2	NA	Evidence at transcript level	GO:0006914; GO:0004197; GO:0005737; GO:0015031		SUBCELLULAR LOCATION: Cytoplasm {ECO:0000256|SAAS:SAAS00570686}.
B3KVX2	NA	Evidence at transcript level	GO:0005634		SUBCELLULAR LOCATION: Nucleus {ECO:0000256|SAAS:SAAS00560942}.
B3KX11	NA	Evidence at transcript level	GO:0005524; GO:0005737; GO:0006457		SUBCELLULAR LOCATION: Cytoplasm {ECO:0000256|SAAS:SAAS00547836}.
B3KXD6	PES1	Evidence at protein level	GO:0005737; GO:0005730; GO:0005654; GO:0005634; GO:0006364		SUBCELLULAR LOCATION: Nucleus, nucleolus {ECO:0000256|SAAS:SAAS00560967}.; SUBCELLULAR LOCATION: Nucleus, nucleoplasm {ECO:0000256|SAAS:SAAS00560968}.
B3KXK2	NA	Evidence at transcript level	GO:0003677; GO:0046872; GO:0005634		SUBCELLULAR LOCATION: Nucleus {ECO:0000256|SAAS:SAAS00548613}.
B3KXT5	NA	Evidence at transcript level	GO:0046872; GO:0003676; GO:0005634; GO:0003700; GO:0006351		SUBCELLULAR LOCATION: Nucleus {ECO:0000256|SAAS:SAAS00574784}.
B3KXT6	NA	Evidence at transcript level	GO:0005634; GO:0006355; GO:0043565		SUBCELLULAR LOCATION: Nucleus {ECO:0000256|RuleBase:RU000682, ECO:0000256|SAAS:SAAS00544279}.
B3KXW5	NA	Evidence at transcript level	GO:0005794; GO:0030131; GO:0005737; GO:0043231; GO:0006886; GO:0005765; GO:0008565; GO:0016192		SUBCELLULAR LOCATION: Cytoplasm {ECO:0000256|SAAS:SAAS00556307}.
B3KXX5	NA	Evidence at transcript level	GO:0005524; GO:0005694; GO:0051276; GO:0005634		SUBCELLULAR LOCATION: Nucleus {ECO:0000256|PIRNR:PIRNR005719}.
B3KXZ4	NA	Evidence at transcript level	GO:0005524; GO:0003677; GO:0003678; GO:0006270; GO:0042555; GO:0005634		SUBCELLULAR LOCATION: Nucleus {ECO:0000256|SAAS:SAAS00534438}.
B3KY63	NA	Evidence at transcript level	GO:0005524; GO:0008026; GO:0003677; GO:0016581; GO:0006325; GO:0006355; GO:0051225; GO:0008270		SUBCELLULAR LOCATION: Nucleus {ECO:0000256|SAAS:SAAS00539527}.
B4DDF2	NA	Evidence at transcript level	GO:0016573; GO:0008285; GO:0005634; GO:0043065; GO:0008270		SUBCELLULAR LOCATION: Nucleus {ECO:0000256|RuleBase:RU361213}.
B4DDF5	MCM7	Evidence at transcript level	GO:0005524; GO:0003677; GO:0003678; GO:0006270; GO:0042555; GO:0005634		SUBCELLULAR LOCATION: Nucleus {ECO:0000256|SAAS:SAAS00534438}.
B4DDN4	EIF3C	Evidence at transcript level	GO:0016282; GO:0033290; GO:0005852; GO:0001731; GO:0006446; GO:0003743		SUBCELLULAR LOCATION: Cytoplasm {ECO:0000256|HAMAP-Rule:MF_03002, ECO:0000256|SAAS:SAAS00535949}.
B4DDP1	NA	Evidence at transcript level	GO:0003677; GO:0005634; GO:0006355; GO:0003707; GO:0006351		SUBCELLULAR LOCATION: Nucleus {ECO:0000256|SAAS:SAAS00595767}.
B4DDQ6	PTPA	Evidence at protein level	GO:0005737; GO:0003755; GO:0019211		SUBCELLULAR LOCATION: Cytoplasm {ECO:0000256|RuleBase:RU361210}.
B4DDU2	NA	Evidence at transcript level	GO:0005525; GO:0003924; GO:0005737; GO:0005874; GO:0007017; GO:0005200		SUBCELLULAR LOCATION: Cytoplasm, cytoskeleton {ECO:0000256|SAAS:SAAS00392180}.
B4DDU6	NA	Evidence at transcript level	GO:0005524; GO:0005737; GO:0006457		SUBCELLULAR LOCATION: Cytoplasm {ECO:0000256|SAAS:SAAS00547836}.
B4DE30	NA	Evidence at transcript level	GO:0005524; GO:0005737; GO:0006457		SUBCELLULAR LOCATION: Cytoplasm {ECO:0000256|SAAS:SAAS00547836}.
B4DE95	NA	Evidence at transcript level	GO:0046872; GO:0003676; GO:0005634; GO:0003700; GO:0006351		SUBCELLULAR LOCATION: Nucleus {ECO:0000256|SAAS:SAAS00574784}.
B4DEA4	NA	Evidence at transcript level	GO:0006914; GO:0004197; GO:0005737; GO:0015031		SUBCELLULAR LOCATION: Cytoplasm {ECO:0000256|SAAS:SAAS00570686}.
B4DEB1	H3F3A	Evidence at protein level	GO:0003677; GO:0000786; GO:0005634		SUBCELLULAR LOCATION: Chromosome {ECO:0000256|SAAS:SAAS00597685}.; SUBCELLULAR LOCATION: Nucleus {ECO:0000256|SAAS:SAAS00597723}.
B4DEH6	NA	Evidence at transcript level	GO:0005634; GO:0006357; GO:0043565; GO:0003700		SUBCELLULAR LOCATION: Nucleus {ECO:0000256|SAAS:SAAS00535900}.
B4DEL2	NA	Evidence at transcript level	GO:0016568; GO:0005634; GO:0008270		SUBCELLULAR LOCATION: Nucleus {ECO:0000256|RuleBase:RU361213}.
B4DEN9	BOP1	Evidence at transcript level	GO:0000466; GO:0000463; GO:0005730; GO:0005654; GO:0030687; GO:0043021		SUBCELLULAR LOCATION: Nucleus, nucleolus {ECO:0000256|HAMAP-Rule:MF_03027}. Nucleus, nucleoplasm {ECO:0000256|HAMAP-Rule:MF_03027}.; SUBCELLULAR LOCATION: Nucleus, nucleoplasm {ECO:0000256|SAAS:SAAS00535448}.
B4DEV8	NA	Evidence at transcript level	GO:0005737; GO:0016021; GO:0005634; GO:0019773; GO:0004298; GO:0006511		SUBCELLULAR LOCATION: Cytoplasm {ECO:0000256|RuleBase:RU000551}. Nucleus {ECO:0000256|RuleBase:RU000551}.; SUBCELLULAR LOCATION: Nucleus {ECO:0000256|SAAS:SAAS00594407}.	TRANSMEM 105 123 Helical. {ECO:0000256|SAM:Phobius}.
B4DF22	NA	Evidence at transcript level	GO:0090544; GO:0003677; GO:0006338; GO:0006357		SUBCELLULAR LOCATION: Nucleus {ECO:0000256|SAAS:SAAS00548613}.
B4DF66	NA	Evidence at transcript level	GO:0003676; GO:0000166; GO:0005634; GO:0008270		SUBCELLULAR LOCATION: Nucleus {ECO:0000256|SAAS:SAAS00591741}.
B4DFH6	NA	Evidence at transcript level	GO:0005525; GO:0003924; GO:0005737; GO:0005874; GO:0007017; GO:0005200		SUBCELLULAR LOCATION: Cytoplasm, cytoskeleton {ECO:0000256|SAAS:SAAS00045381}.
B4DFL3	NA	Evidence at transcript level	GO:0005634; GO:0005839; GO:0051603; GO:0004298		SUBCELLULAR LOCATION: Nucleus {ECO:0000256|SAAS:SAAS00551005}.
B4DG18	NA	Evidence at transcript level	GO:0004402; GO:0005634; GO:0006355		SUBCELLULAR LOCATION: Nucleus {ECO:0000256|RuleBase:RU361211}.
B4DGC1	NA	Evidence at transcript level	GO:0003677; GO:0005783; GO:0016021; GO:0005634		SUBCELLULAR LOCATION: Nucleus {ECO:0000256|RuleBase:RU000682}.	TRANSMEM 46 64 Helical. {ECO:0000256|SAM:Phobius}.
B4DGH8	NA	Evidence at transcript level	GO:0004402; GO:0005634; GO:0006355		SUBCELLULAR LOCATION: Nucleus {ECO:0000256|RuleBase:RU361211}.
B4DGM8	NA	Evidence at transcript level	GO:0006914; GO:0008234; GO:0005737; GO:0015031		SUBCELLULAR LOCATION: Cytoplasm {ECO:0000256|SAAS:SAAS00570686}.
B4DGQ2	NA	Evidence at transcript level	GO:0004519; GO:0006289; GO:0005634; GO:0003697		SUBCELLULAR LOCATION: Nucleus {ECO:0000256|SAAS:SAAS00537425}.
B4DGU2	NA	Evidence at transcript level	GO:0003677; GO:0046872; GO:0005634		SUBCELLULAR LOCATION: Nucleus {ECO:0000256|RuleBase:RU000682}.
B4DGV5	NA	Evidence at transcript level	GO:0003677; GO:0005634; GO:0006355		SUBCELLULAR LOCATION: Nucleus {ECO:0000256|SAAS:SAAS00563020}.
B4DH59	NBPF26	Uncertain	GO:0005737		SUBCELLULAR LOCATION: Cytoplasm {ECO:0000250}.
B4DH80	NA	Evidence at transcript level	GO:0003677; GO:0046872; GO:0005634; GO:0006355; GO:0006351		SUBCELLULAR LOCATION: Nucleus {ECO:0000256|RuleBase:RU363046}.
B4DHW2	NA	Evidence at transcript level	GO:0003677; GO:0006260; GO:0005634; GO:0003700; GO:0006351		SUBCELLULAR LOCATION: Nucleus {ECO:0000256|RuleBase:RU000690, ECO:0000256|SAAS:SAAS00573677}.
B4DIJ7	NA	Evidence at transcript level	GO:0008168; GO:0005634		SUBCELLULAR LOCATION: Nucleus {ECO:0000256|SAAS:SAAS00574581}.
B4DJ40	NA	Evidence at transcript level	GO:0004402; GO:0005634; GO:0006355		SUBCELLULAR LOCATION: Nucleus {ECO:0000256|RuleBase:RU361211}.
B4DJ43	NA	Evidence at transcript level	GO:0005525; GO:0003924; GO:0005737; GO:0005874; GO:0007017; GO:0005200		SUBCELLULAR LOCATION: Cytoplasm, cytoskeleton {ECO:0000256|SAAS:SAAS00045381}.
B4DJC3	H2AFY	Evidence at protein level	GO:0003677; GO:0000786; GO:0005634		SUBCELLULAR LOCATION: Nucleus {ECO:0000256|RuleBase:RU000527}.
B4DJS4	NA	Evidence at transcript level	GO:0005634; GO:0006357; GO:0043565; GO:0003700		SUBCELLULAR LOCATION: Nucleus {ECO:0000256|SAAS:SAAS00535900}.
B4DL29	NA	Evidence at transcript level	GO:0006914; GO:0004197; GO:0005737; GO:0015031		SUBCELLULAR LOCATION: Cytoplasm {ECO:0000256|SAAS:SAAS00570686}.
B4DL38	NA	Evidence at transcript level	GO:0003677; GO:0046872; GO:0005634; GO:0006355; GO:0006351		SUBCELLULAR LOCATION: Nucleus {ECO:0000256|RuleBase:RU363046}.
B4DLA6	NA	Evidence at transcript level	GO:0005524; GO:0003677; GO:0003678; GO:0006270; GO:0042555; GO:0005634		SUBCELLULAR LOCATION: Nucleus {ECO:0000256|SAAS:SAAS00534438}.
B4DLB7	NA	Evidence at transcript level	GO:0003677; GO:0005737; GO:0005730; GO:0005634; GO:0006355		SUBCELLULAR LOCATION: Nucleus {ECO:0000256|SAAS:SAAS00563020}.
B4DLX5	NA	Evidence at transcript level	GO:0005737; GO:0003755; GO:0019211		SUBCELLULAR LOCATION: Cytoplasm {ECO:0000256|RuleBase:RU361210}.
B4DM62	NA	Evidence at transcript level	GO:0007275; GO:0005634; GO:0043565; GO:0003700		SUBCELLULAR LOCATION: Nucleus {ECO:0000256|RuleBase:RU000682}.
B4DM63	NA	Evidence at transcript level	GO:0034314; GO:0005885; GO:0005737		SUBCELLULAR LOCATION: Cytoplasm, cytoskeleton {ECO:0000256|PIRNR:PIRNR016315}.
B4DMH2	NA	Evidence at transcript level	GO:0006915; GO:0007049; GO:0005737; GO:0046872; GO:0005634; GO:0051262; GO:0003700; GO:0044212; GO:0006351		SUBCELLULAR LOCATION: Cytoplasm {ECO:0000256|RuleBase:RU003304}. Nucleus {ECO:0000256|RuleBase:RU003304}.
B4DMJ5	NA	Evidence at transcript level	GO:0005525; GO:0003924; GO:0005737; GO:0005874; GO:0007017; GO:0005200		SUBCELLULAR LOCATION: Cytoplasm, cytoskeleton {ECO:0000256|SAAS:SAAS00045381}.
B4DMT5	EIF3F	Evidence at transcript level	GO:0016282; GO:0033290; GO:0005852; GO:0001731; GO:0006446; GO:0003743		SUBCELLULAR LOCATION: Cytoplasm {ECO:0000256|HAMAP-Rule:MF_03005, ECO:0000256|SAAS:SAAS00003543}.
B4DMU8	NA	Evidence at transcript level	GO:0005525; GO:0003924; GO:0005737; GO:0005874; GO:0007017		SUBCELLULAR LOCATION: Cytoplasm, cytoskeleton {ECO:0000256|SAAS:SAAS00540861}.
B4DMV4	NA	Evidence at transcript level	GO:0005634; GO:0043565; GO:0003700; GO:0006351		SUBCELLULAR LOCATION: Nucleus {ECO:0000256|SAAS:SAAS00582275}.
B4DN49	NA	Evidence at transcript level	GO:0005524; GO:0006298; GO:0032300; GO:0030983		SUBCELLULAR LOCATION: Nucleus {ECO:0000256|PIRNR:PIRNR005813}.
B4DN58	NA	Evidence at transcript level	GO:0005525; GO:0003924; GO:0005737; GO:0005874; GO:0007017; GO:0005200		SUBCELLULAR LOCATION: Cytoplasm, cytoskeleton {ECO:0000256|SAAS:SAAS00540860}.
B4DN83	NA	Evidence at transcript level	GO:0005634; GO:0043565; GO:0003700		SUBCELLULAR LOCATION: Nucleus {ECO:0000256|SAAS:SAAS00594387}.
B4DNI2	NA	Evidence at transcript level	GO:0006915; GO:0007049; GO:0005737; GO:0046872; GO:0005634; GO:0051262; GO:0003700; GO:0044212; GO:0006351		SUBCELLULAR LOCATION: Cytoplasm {ECO:0000256|RuleBase:RU003304}. Nucleus {ECO:0000256|RuleBase:RU003304}.
B4DNJ7	IMPDH	Evidence at transcript level	GO:0006177; GO:0003938; GO:0005737; GO:0046872; GO:0000166; GO:0005634		SUBCELLULAR LOCATION: Cytoplasm {ECO:0000256|HAMAP-Rule:MF_03156}. Nucleus {ECO:0000256|HAMAP-Rule:MF_03156}.
B4DNP0	NA	Evidence at transcript level	GO:0003677; GO:0005737; GO:0005634; GO:0004871; GO:0003700; GO:0006351		SUBCELLULAR LOCATION: Cytoplasm {ECO:0000256|RuleBase:RU046415}.; SUBCELLULAR LOCATION: Nucleus {ECO:0000256|RuleBase:RU046415}.
B4DNY2	NA	Evidence at transcript level	GO:0006914; GO:0004197; GO:0005737; GO:0015031		SUBCELLULAR LOCATION: Cytoplasm {ECO:0000256|SAAS:SAAS00570686}.
B4DP54	NA	Evidence at transcript level	GO:0005525; GO:0003924; GO:0005737; GO:0005874; GO:0007017; GO:0005200		SUBCELLULAR LOCATION: Cytoplasm, cytoskeleton {ECO:0000256|SAAS:SAAS00045381}.
B4DPA6	NA	Evidence at transcript level	GO:0003677; GO:0005634; GO:0008270		SUBCELLULAR LOCATION: Nucleus {ECO:0000256|RuleBase:RU000682, ECO:0000256|SAAS:SAAS00397436}.
B4DPJ8	NA	Evidence at transcript level	GO:0005524; GO:0005737; GO:0006457		SUBCELLULAR LOCATION: Cytoplasm {ECO:0000256|SAAS:SAAS00547836}.
B4DPL6	NA	Evidence at transcript level	GO:0003677; GO:0005634; GO:0045893		SUBCELLULAR LOCATION: Nucleus {ECO:0000256|RuleBase:RU000682}.
B4DPN4	NA	Evidence at transcript level	GO:0003677; GO:0005634; GO:0045893		SUBCELLULAR LOCATION: Nucleus {ECO:0000256|RuleBase:RU000682}.
B4DPR1	NA	Evidence at transcript level	GO:0004879; GO:0005634; GO:0043565; GO:0003707; GO:0006351; GO:0008270		SUBCELLULAR LOCATION: Nucleus {ECO:0000256|SAAS:SAAS00595767}.
B4DPS2	USB1	Evidence at transcript level	GO:0008380; GO:0034477; GO:0006397; GO:0004518; GO:0005634		SUBCELLULAR LOCATION: Nucleus {ECO:0000256|HAMAP-Rule:MF_03040}.
B4DQ48	EIF3K	Evidence at protein level	GO:0005737; GO:0005852; GO:0006446; GO:0043022; GO:0003743		SUBCELLULAR LOCATION: Cytoplasm {ECO:0000256|SAAS:SAAS00533625}.
B4DQB3	NA	Evidence at transcript level	GO:0003677; GO:0005737; GO:0005634; GO:0004871; GO:0003700; GO:0006351		SUBCELLULAR LOCATION: Cytoplasm {ECO:0000256|RuleBase:RU046415}.; SUBCELLULAR LOCATION: Nucleus {ECO:0000256|RuleBase:RU046415}.
B4DQE4	NA	Evidence at transcript level	GO:0004879; GO:0005634; GO:0043565; GO:0003707; GO:0006351; GO:0008270		SUBCELLULAR LOCATION: Nucleus {ECO:0000256|SAAS:SAAS00595767}.
B4DQF6	EIF3L	Evidence at transcript level	GO:0016282; GO:0033290; GO:0005852; GO:0001731; GO:0006446; GO:0003743		SUBCELLULAR LOCATION: Cytoplasm {ECO:0000256|HAMAP-Rule:MF_03011}.
B4DQK4	NA	Evidence at transcript level	GO:0005525; GO:0003924; GO:0005737; GO:0005874; GO:0007017; GO:0005200		SUBCELLULAR LOCATION: Cytoplasm, cytoskeleton {ECO:0000256|SAAS:SAAS00392180}.
B4DQX0	NA	Evidence at transcript level	GO:0003723; GO:0005737; GO:0000166		SUBCELLULAR LOCATION: Cytoplasm {ECO:0000256|RuleBase:RU362004}.
B4DR42	NA	Evidence at transcript level	GO:0003677; GO:0005737; GO:0005634; GO:0004871; GO:0003700; GO:0006351		SUBCELLULAR LOCATION: Cytoplasm {ECO:0000256|RuleBase:RU046415}.; SUBCELLULAR LOCATION: Nucleus {ECO:0000256|RuleBase:RU046415}.
B4DR52	NA	Evidence at transcript level	GO:0003677; GO:0000786; GO:0005634		SUBCELLULAR LOCATION: Chromosome {ECO:0000256|SAAS:SAAS00565666}.; SUBCELLULAR LOCATION: Nucleus {ECO:0000256|RuleBase:RU000451, ECO:0000256|SAAS:SAAS00566189}.
B4DRN9	NA	Evidence at transcript level	GO:0003677; GO:0006260; GO:0005634; GO:0003700; GO:0006351		SUBCELLULAR LOCATION: Nucleus {ECO:0000256|RuleBase:RU000690, ECO:0000256|SAAS:SAAS00573677}.
B4DRS1	NA	Evidence at transcript level	GO:0003676; GO:0000166; GO:0005634; GO:0008270		SUBCELLULAR LOCATION: Nucleus {ECO:0000256|SAAS:SAAS00591741}.
B4DRT6	UNG	Evidence at transcript level	GO:0006284; GO:0005739; GO:0005634; GO:0004844		SUBCELLULAR LOCATION: Mitochondrion {ECO:0000256|HAMAP-Rule:MF_03166}. Nucleus {ECO:0000256|HAMAP-Rule:MF_03166}.
B4DRU0	EIF3C	Evidence at transcript level	GO:0016282; GO:0033290; GO:0005852; GO:0001731; GO:0006446; GO:0003743		SUBCELLULAR LOCATION: Cytoplasm {ECO:0000256|HAMAP-Rule:MF_03002, ECO:0000256|SAAS:SAAS00535949}.
B4DRV7	NA	Evidence at transcript level	GO:0008434; GO:0005634; GO:0043565; GO:0003707; GO:0006351; GO:0008270		SUBCELLULAR LOCATION: Nucleus {ECO:0000256|SAAS:SAAS00595767}.
B4DS26	NA	Evidence at transcript level	GO:0003677; GO:0046872; GO:0005634		SUBCELLULAR LOCATION: Nucleus {ECO:0000256|RuleBase:RU000682}.
B4DS45	NA	Evidence at transcript level	GO:0005737; GO:0005874; GO:0007020; GO:0005815; GO:0000922		SUBCELLULAR LOCATION: Cytoplasm, cytoskeleton, microtubule organizing center {ECO:0000256|RuleBase:RU363050}.
B4DS74	NA	Evidence at transcript level	GO:0003677; GO:0006260; GO:0005634; GO:0003700; GO:0006351		SUBCELLULAR LOCATION: Nucleus {ECO:0000256|RuleBase:RU000690, ECO:0000256|SAAS:SAAS00573677}.
B4DSB3	NA	Evidence at transcript level	GO:0005737; GO:0005874		SUBCELLULAR LOCATION: Cytoplasm, cytoskeleton {ECO:0000256|RuleBase:RU000686}.
B4DSB8	NA	Evidence at transcript level	GO:0003677; GO:0046872; GO:0005634		SUBCELLULAR LOCATION: Nucleus {ECO:0000256|RuleBase:RU000682}.
B4DSE3	NA	Evidence at transcript level	GO:0005737; GO:0005874		SUBCELLULAR LOCATION: Cytoplasm, cytoskeleton {ECO:0000256|RuleBase:RU000686}.
B4DSI3	NA	Evidence at transcript level	GO:0005634; GO:0003708; GO:0043565; GO:0003707; GO:0006351; GO:0008270		SUBCELLULAR LOCATION: Nucleus {ECO:0000256|SAAS:SAAS00595767}.
B4DSQ1	NA	Evidence at transcript level	GO:0005737; GO:0005874		SUBCELLULAR LOCATION: Cytoplasm, cytoskeleton {ECO:0000256|RuleBase:RU000686}.
B4DSV5	NA	Evidence at transcript level	GO:0005524; GO:0003677; GO:0003678; GO:0006270; GO:0042555; GO:0005634		SUBCELLULAR LOCATION: Nucleus {ECO:0000256|SAAS:SAAS00534438}.
B4DSY7	NA	Evidence at transcript level	GO:0003677; GO:0019221; GO:0005737; GO:0005634; GO:0045944; GO:0004871; GO:0003700; GO:0006351		SUBCELLULAR LOCATION: Cytoplasm {ECO:0000256|RuleBase:RU046415}.; SUBCELLULAR LOCATION: Nucleus {ECO:0000256|RuleBase:RU046415}.
B4DSZ7	NA	Evidence at transcript level	GO:0046872; GO:0005634; GO:0043565; GO:0003700; GO:0006351		SUBCELLULAR LOCATION: Nucleus {ECO:0000256|SAAS:SAAS00582275}.
B4DT51	NA	Evidence at transcript level	GO:0016829; GO:0003676; GO:0000213; GO:0000214; GO:0000379		SUBCELLULAR LOCATION: Nucleus {ECO:0000256|PIRNR:PIRNR017250}.
B4DTB6	NA	Evidence at transcript level	GO:0005634; GO:0043565; GO:0003700; GO:0006351		SUBCELLULAR LOCATION: Nucleus {ECO:0000256|SAAS:SAAS00582275}.
B4DTC7	NA	Evidence at transcript level	GO:0003677; GO:0005634; GO:0003707; GO:0004887; GO:0006351		SUBCELLULAR LOCATION: Nucleus {ECO:0000256|SAAS:SAAS00595767}.
B4DTK5	NA	Evidence at transcript level	GO:0003677; GO:0005634; GO:0003700; GO:0006351		SUBCELLULAR LOCATION: Nucleus {ECO:0000256|SAAS:SAAS00353240}.
B4DTS2	NA	Evidence at protein level	GO:0005524; GO:0005737; GO:0035556; GO:0046872; GO:0005654; GO:0004697		SUBCELLULAR LOCATION: Cytoplasm {ECO:0000256|PIRNR:PIRNR000552}.
B4DU20	NA	Evidence at transcript level	GO:0003677; GO:0005634; GO:0006355; GO:0006351		SUBCELLULAR LOCATION: Nucleus {ECO:0000256|SAAS:SAAS00573650}.
B4DU44	NA	Evidence at transcript level	GO:0005737; GO:0031424		SUBCELLULAR LOCATION: Cytoplasm {ECO:0000256|RuleBase:RU000533}.
B4DU55	ZNF879	Evidence at transcript level	GO:0003677; GO:0046872; GO:0005634; GO:0006355; GO:0003700; GO:0006351		SUBCELLULAR LOCATION: Nucleus {ECO:0000305}.
B4DUA2	NA	Evidence at transcript level	GO:0003677; GO:0030337; GO:0006260; GO:0005634; GO:0006275		SUBCELLULAR LOCATION: Nucleus {ECO:0000256|RuleBase:RU000641}.
B4DUC8	MTAP	Evidence at protein level	GO:0019509; GO:0017061; GO:0005737; GO:0005634; GO:0006166		SUBCELLULAR LOCATION: Cytoplasm {ECO:0000256|HAMAP-Rule:MF_03155}. Nucleus {ECO:0000256|HAMAP-Rule:MF_03155}.
B4DUD9	NA	Evidence at transcript level	GO:0005524; GO:0005737; GO:0005856; GO:0004715		SUBCELLULAR LOCATION: Cytoplasm, cytoskeleton {ECO:0000256|PIRNR:PIRNR000632}.
B4DUR8	CCT3	Evidence at protein level	GO:0005524; GO:0005737; GO:0005886; GO:0006457		SUBCELLULAR LOCATION: Cytoplasm {ECO:0000256|SAAS:SAAS00547836}.
B4DUS0	NA	Evidence at transcript level	GO:0006281; GO:0007049; GO:0005634		SUBCELLULAR LOCATION: Nucleus {ECO:0000256|PIRNR:PIRNR028983}.
B4DV00	NA	Evidence at transcript level	GO:0005829; GO:0008469; GO:0005634		SUBCELLULAR LOCATION: Cytoplasm {ECO:0000256|PIRNR:PIRNR015894}.; SUBCELLULAR LOCATION: Nucleus {ECO:0000256|PIRNR:PIRNR015894}.
B4DV04	NA	Evidence at transcript level	GO:0003677; GO:0019221; GO:0005737; GO:0005634; GO:0045944; GO:0004871; GO:0003700; GO:0006351		SUBCELLULAR LOCATION: Cytoplasm {ECO:0000256|RuleBase:RU046415}.; SUBCELLULAR LOCATION: Nucleus {ECO:0000256|RuleBase:RU046415}.
B4DV51	RAN	Evidence at protein level	GO:0005525; GO:0003924; GO:0006886; GO:0006913; GO:0005634; GO:0007264		SUBCELLULAR LOCATION: Nucleus {ECO:0000256|RuleBase:RU363057}.
B4DV59	RCOR3	Evidence at protein level	GO:0003677; GO:0005634		SUBCELLULAR LOCATION: Nucleus {ECO:0000256|SAAS:SAAS00548613}.
B4DV79	EIF3B	Evidence at transcript level	GO:0016282; GO:0033290; GO:0005852; GO:0001731; GO:0000166; GO:0006446; GO:0003743		SUBCELLULAR LOCATION: Cytoplasm {ECO:0000256|HAMAP-Rule:MF_03001, ECO:0000256|PIRNR:PIRNR036424, ECO:0000256|SAAS:SAAS00319717}.
B4DVD7	EIF3K	Evidence at transcript level	GO:0016282; GO:0033290; GO:0005852; GO:0001731; GO:0005634; GO:0006446; GO:0043022; GO:0003743		SUBCELLULAR LOCATION: Cytoplasm {ECO:0000256|SAAS:SAAS00533625}.; SUBCELLULAR LOCATION: Nucleus {ECO:0000256|HAMAP-Rule:MF_03010}. Cytoplasm {ECO:0000256|HAMAP-Rule:MF_03010}.
B4DVG0	NA	Evidence at transcript level	GO:0003677; GO:0046872; GO:0005634; GO:0006355; GO:0006351		SUBCELLULAR LOCATION: Nucleus {ECO:0000256|RuleBase:RU363046}.
B4DVH3	NA	Evidence at transcript level	GO:0046872; GO:0003676; GO:0005634; GO:0003700; GO:0006351		SUBCELLULAR LOCATION: Nucleus {ECO:0000256|SAAS:SAAS00574784}.
B4DVM4	TAF6L	Evidence at transcript level	GO:0006352; GO:0005634		SUBCELLULAR LOCATION: Nucleus {ECO:0000256|SAAS:SAAS00570996}.
B4DVM9	NA	Evidence at transcript level	GO:0003677; GO:0005634; GO:0016706; GO:0008270		SUBCELLULAR LOCATION: Nucleus {ECO:0000256|SAAS:SAAS00575847}.
B4DVQ5	EIF3C	Evidence at transcript level	GO:0016282; GO:0033290; GO:0005852; GO:0001731; GO:0006446; GO:0003743		SUBCELLULAR LOCATION: Cytoplasm {ECO:0000256|HAMAP-Rule:MF_03002, ECO:0000256|SAAS:SAAS00535949}.
B4DVR6	NA	Evidence at transcript level	GO:0003677; GO:0005737; GO:0005634; GO:0004871; GO:0003700; GO:0006351	SIGNAL 1 25 {ECO:0000256|SAM:SignalP}.	SUBCELLULAR LOCATION: Cytoplasm {ECO:0000256|RuleBase:RU046415}.; SUBCELLULAR LOCATION: Nucleus {ECO:0000256|RuleBase:RU046415}.
B4DVS0	SNRPB	Evidence at transcript level	GO:0003723; GO:0030529; GO:0005634; GO:0019013		SUBCELLULAR LOCATION: Nucleus {ECO:0000256|PIRNR:PIRNR037187}.
B4DVU3	EIF3C	Evidence at transcript level	GO:0016282; GO:0033290; GO:0005852; GO:0001731; GO:0006446; GO:0003743		SUBCELLULAR LOCATION: Cytoplasm {ECO:0000256|HAMAP-Rule:MF_03002, ECO:0000256|SAAS:SAAS00535949}.
B4DVX5	NA	Evidence at transcript level	GO:0005634; GO:0043565; GO:0003700		SUBCELLULAR LOCATION: Nucleus {ECO:0000256|SAAS:SAAS00594387}.
B4DVZ8	NA	Evidence at transcript level	GO:0005737; GO:0019370; GO:0004463; GO:0008237; GO:0008270		SUBCELLULAR LOCATION: Cytoplasm {ECO:0000256|RuleBase:RU361141}.
B4DW30	NA	Evidence at transcript level	GO:0005524; GO:0043141; GO:0006310; GO:0006281; GO:0005634; GO:0006355; GO:0006351		SUBCELLULAR LOCATION: Nucleus {ECO:0000256|RuleBase:RU363048}.
B4DWC4	NA	Evidence at transcript level	GO:0006915; GO:0005254; GO:0034707; GO:0005737; GO:0005244		SUBCELLULAR LOCATION: Membrane {ECO:0000256|RuleBase:RU362009}; Single-pass membrane protein {ECO:0000256|RuleBase:RU362009}. Cytoplasm {ECO:0000256|RuleBase:RU362009}.
B4DWZ4	FEN1	Evidence at transcript level	GO:0008409; GO:0017108; GO:0003677; GO:0043137; GO:0006284; GO:0000287; GO:0005739; GO:0005730; GO:0005654		SUBCELLULAR LOCATION: Mitochondrion {ECO:0000256|SAAS:SAAS00537654}.; SUBCELLULAR LOCATION: Nucleus, nucleolus {ECO:0000256|HAMAP-Rule:MF_03140}. Nucleus, nucleoplasm {ECO:0000256|HAMAP-Rule:MF_03140}. Mitochondrion {ECO:0000256|HAMAP-Rule:MF_03140}. Note=Resides mostly in the nucleoli and relocalizes to the nucleoplasm upon DNA damage. {ECO:0000256|HAMAP-Rule:MF_03140}.
B4DX08	NA	Evidence at transcript level	GO:0005524; GO:0005737; GO:0006457		SUBCELLULAR LOCATION: Cytoplasm {ECO:0000256|SAAS:SAAS00547836}.
B4DX44	ZNF736	Evidence at transcript level	GO:0000978; GO:0046872; GO:0005634; GO:0006355; GO:0006351		SUBCELLULAR LOCATION: Nucleus {ECO:0000250}.
B4DX80	NA	Evidence at transcript level	GO:0003677; GO:0005634; GO:0006355		SUBCELLULAR LOCATION: Nucleus {ECO:0000256|SAAS:SAAS00563020}.
B4DX96	NA	Evidence at transcript level	GO:0046872; GO:0003676; GO:0005634; GO:0003700; GO:0006351		SUBCELLULAR LOCATION: Nucleus {ECO:0000256|SAAS:SAAS00574784}.
B4DXD3	NR1D2	Evidence at transcript level	GO:0005634; GO:0043565; GO:0003707; GO:0003700; GO:0006351; GO:0008270		SUBCELLULAR LOCATION: Nucleus {ECO:0000256|SAAS:SAAS00595767}.
B4DXI1	NA	Evidence at transcript level	GO:0005524; GO:0005737; GO:0006457		SUBCELLULAR LOCATION: Cytoplasm {ECO:0000256|SAAS:SAAS00547836}.
B4DXN6	EIF3B	Evidence at transcript level	GO:0016282; GO:0033290; GO:0005852; GO:0001731; GO:0000166; GO:0006446; GO:0003743		SUBCELLULAR LOCATION: Cytoplasm {ECO:0000256|HAMAP-Rule:MF_03001, ECO:0000256|PIRNR:PIRNR036424, ECO:0000256|SAAS:SAAS00319717}.
B4DXR9	ZNF732	Evidence at transcript level	GO:0000978; GO:0046872; GO:0005634; GO:0006355; GO:0006351		SUBCELLULAR LOCATION: Nucleus {ECO:0000305}.
B4DXU5	NR1H3	Evidence at protein level	GO:0000978; GO:0004879; GO:0090575; GO:0044255; GO:0071222; GO:0042632; GO:0005737; GO:0008286; GO:0010887; GO:0050728; GO:0043031; GO:0090188; GO:0045861; GO:0090341; GO:0000122; GO:0010875; GO:2000188; GO:0003707; GO:0001077; GO:0070328; GO:0008270		SUBCELLULAR LOCATION: Nucleus {ECO:0000256|SAAS:SAAS00595767}.
B4DXZ5	NA	Evidence at transcript level	GO:0005525; GO:0003924; GO:0005737; GO:0005874; GO:0007017; GO:0005200		SUBCELLULAR LOCATION: Cytoplasm, cytoskeleton {ECO:0000256|SAAS:SAAS00045381}.
B4DY17	APIP	Evidence at transcript level	GO:0019284; GO:0019509; GO:0006915; GO:0005737; GO:0046570; GO:0008270		SUBCELLULAR LOCATION: Cytoplasm {ECO:0000256|HAMAP-Rule:MF_03116, ECO:0000256|SAAS:SAAS00212119}.
B4DYF0	NA	Evidence at transcript level	GO:0046872; GO:0003676; GO:0005634; GO:0003700; GO:0006351		SUBCELLULAR LOCATION: Nucleus {ECO:0000256|SAAS:SAAS00535819}.
B4DYF9	NA	Evidence at transcript level	GO:0043044; GO:0003677; GO:0016514		SUBCELLULAR LOCATION: Nucleus {ECO:0000256|SAAS:SAAS00548613}.
B4DYP7	NA	Evidence at transcript level	GO:0005737; GO:0005874; GO:0007020; GO:0005815; GO:0000922		SUBCELLULAR LOCATION: Cytoplasm, cytoskeleton, microtubule organizing center {ECO:0000256|RuleBase:RU363050}.
B4DYQ1	NA	Evidence at transcript level	GO:0043044; GO:0003677; GO:0016514		SUBCELLULAR LOCATION: Nucleus {ECO:0000256|SAAS:SAAS00548613}.
B4DZ92	NA	Evidence at transcript level	GO:0003676; GO:0005634; GO:0008270		SUBCELLULAR LOCATION: Nucleus {ECO:0000256|SAAS:SAAS00591741}.
B4DZC0	NA	Evidence at transcript level	GO:0005524; GO:0043044; GO:0016887; GO:0003677; GO:0016589		SUBCELLULAR LOCATION: Nucleus {ECO:0000256|SAAS:SAAS00548613}.
B4DZF8	NA	Evidence at transcript level	GO:0005737; GO:0003755; GO:0019211		SUBCELLULAR LOCATION: Cytoplasm {ECO:0000256|RuleBase:RU361210}.
B4DZJ7	NA	Evidence at transcript level	GO:0005654; GO:0032784; GO:0006357; GO:0006351; GO:0003746		SUBCELLULAR LOCATION: Nucleus {ECO:0000256|PIRNR:PIRNR036945}.
B4DZK0	NA	Evidence at transcript level	GO:0006914; GO:0004197; GO:0005737; GO:0015031		SUBCELLULAR LOCATION: Cytoplasm {ECO:0000256|SAAS:SAAS00570686}.
B4DZP1	NA	Evidence at transcript level	GO:0005634; GO:0003700; GO:0005667; GO:0006351; GO:0007179		SUBCELLULAR LOCATION: Nucleus {ECO:0000256|SAAS:SAAS00573677}.
B4DZT5	NA	Evidence at transcript level	GO:0005524; GO:0005737; GO:0005730; GO:0006457		SUBCELLULAR LOCATION: Cytoplasm {ECO:0000256|SAAS:SAAS00547836}.
B4DZW4	NA	Evidence at transcript level	GO:0003723; GO:0005737; GO:0000166		SUBCELLULAR LOCATION: Cytoplasm {ECO:0000256|RuleBase:RU362004}.
B4E052	NA	Evidence at transcript level	GO:0005525; GO:0003924; GO:0005737; GO:0005874; GO:0007017; GO:0005200		SUBCELLULAR LOCATION: Cytoplasm, cytoskeleton {ECO:0000256|SAAS:SAAS00045381}.
B4E074	NA	Evidence at transcript level	GO:0005730		SUBCELLULAR LOCATION: Nucleus, nucleolus {ECO:0000256|SAAS:SAAS00556393}.
B4E095	NA	Evidence at transcript level	GO:0006915; GO:0007049; GO:0005737; GO:0046872; GO:0005634; GO:0003700; GO:0044212; GO:0006351		SUBCELLULAR LOCATION: Cytoplasm {ECO:0000256|RuleBase:RU003304}. Nucleus {ECO:0000256|RuleBase:RU003304}.
B4E0A3	NA	Evidence at transcript level	GO:0003676; GO:0005634; GO:0008270		SUBCELLULAR LOCATION: Nucleus {ECO:0000256|SAAS:SAAS00591741}.
B4E0B3	NA	Evidence at transcript level	GO:0003677; GO:0000786; GO:0005634		SUBCELLULAR LOCATION: Nucleus {ECO:0000256|RuleBase:RU000527}.
B4E0N8	HP1BP3	Evidence at transcript level	GO:0003677; GO:0003682; GO:0070828; GO:0000786; GO:0006334; GO:0005634; GO:0006355		SUBCELLULAR LOCATION: Nucleus {ECO:0000256|RuleBase:RU003895}.
B4E0P9	NA	Evidence at transcript level	GO:0046872; GO:0003676; GO:0005634; GO:0003700; GO:0006351		SUBCELLULAR LOCATION: Nucleus {ECO:0000256|SAAS:SAAS00574784}.
B4E0X6	NA	Evidence at transcript level	GO:0005737; GO:0016021; GO:0005634; GO:0019773; GO:0004298; GO:0006511		SUBCELLULAR LOCATION: Cytoplasm {ECO:0000256|RuleBase:RU000551}. Nucleus {ECO:0000256|RuleBase:RU000551}.; SUBCELLULAR LOCATION: Nucleus {ECO:0000256|SAAS:SAAS00594407}.	TRANSMEM 105 123 Helical. {ECO:0000256|SAM:Phobius}.
B4E142	NA	Evidence at transcript level	GO:0005634; GO:0008270		SUBCELLULAR LOCATION: Nucleus {ECO:0000256|SAAS:SAAS00575847}.
B4E172	NA	Evidence at transcript level	GO:0003677; GO:0046872; GO:0007275; GO:0005634; GO:0006355; GO:0006351		SUBCELLULAR LOCATION: Nucleus {ECO:0000256|RuleBase:RU004489}.
B4E1J4	NA	Evidence at transcript level	GO:0005634; GO:0003708; GO:0043565; GO:0043401; GO:0006351; GO:0008270		SUBCELLULAR LOCATION: Nucleus {ECO:0000256|SAAS:SAAS00586772}.
B4E1K8	EIF3D	Evidence at transcript level	GO:0016282; GO:0033290; GO:0005852; GO:0001731; GO:0006446; GO:0003743		SUBCELLULAR LOCATION: Cytoplasm {ECO:0000256|HAMAP-Rule:MF_03003, ECO:0000256|SAAS:SAAS00187789}.
B4E1L0	ADSS	Evidence at transcript level	GO:0044208; GO:0005525; GO:0004019; GO:0005737; GO:0000287		SUBCELLULAR LOCATION: Cytoplasm {ECO:0000256|HAMAP-Rule:MF_03127}.
B4E1L3	NA	Evidence at transcript level	GO:0003677; GO:0005634; GO:0006355; GO:0006351		SUBCELLULAR LOCATION: Nucleus {ECO:0000256|SAAS:SAAS00573650}.
B4E1Y0	NA	Evidence at transcript level	GO:0003677; GO:0005634; GO:0016706; GO:0008270		SUBCELLULAR LOCATION: Nucleus {ECO:0000256|SAAS:SAAS00575847}.
B4E239	NA	Evidence at transcript level	GO:0005634; GO:0008270		SUBCELLULAR LOCATION: Nucleus {ECO:0000256|SAAS:SAAS00575847}.
B4E2M6	NA	Evidence at transcript level	GO:0005634; GO:0043565; GO:0003707; GO:0003700; GO:0006351; GO:0008270		SUBCELLULAR LOCATION: Nucleus {ECO:0000256|SAAS:SAAS00595767}.
B4E2U8	NA	Evidence at transcript level	GO:0003677; GO:0046872; GO:0007275; GO:0005634; GO:0006355; GO:0006351		SUBCELLULAR LOCATION: Nucleus {ECO:0000256|RuleBase:RU004489}.
B4E2Y1	NA	Evidence at transcript level	GO:0004879; GO:0005634; GO:0043565; GO:0003707; GO:0006351; GO:0008270		SUBCELLULAR LOCATION: Nucleus {ECO:0000256|SAAS:SAAS00595767}.
B4E2Z6	EIF3C	Evidence at transcript level	GO:0016282; GO:0033290; GO:0005852; GO:0001731; GO:0006446; GO:0003743		SUBCELLULAR LOCATION: Cytoplasm {ECO:0000256|HAMAP-Rule:MF_03002, ECO:0000256|SAAS:SAAS00535949}.
B4E303	NA	Evidence at transcript level	GO:0005730		SUBCELLULAR LOCATION: Nucleus, nucleolus {ECO:0000256|SAAS:SAAS00556393}.
B4E371	NA	Evidence at transcript level	GO:0003677; GO:0005089; GO:0005634; GO:0035023; GO:0006355; GO:0003707; GO:0006351		SUBCELLULAR LOCATION: Nucleus {ECO:0000256|SAAS:SAAS00595767}.
B4E374	NA	Evidence at transcript level	GO:0003677; GO:0005634; GO:0006355; GO:0003707; GO:0006351		SUBCELLULAR LOCATION: Nucleus {ECO:0000256|SAAS:SAAS00595767}.
B4E380	NA	Evidence at transcript level	GO:0003677; GO:0000786; GO:0005634		SUBCELLULAR LOCATION: Chromosome {ECO:0000256|SAAS:SAAS00597685}.; SUBCELLULAR LOCATION: Nucleus {ECO:0000256|SAAS:SAAS00597723}.
B4E3A6	NA	Evidence at transcript level	GO:0003677; GO:0005634; GO:0003700; GO:0006351		SUBCELLULAR LOCATION: Nucleus {ECO:0000256|SAAS:SAAS00353240}.
B4E3D6	NA	Evidence at transcript level	GO:0002755; GO:0005737; GO:0006954; GO:0043123		SUBCELLULAR LOCATION: Cytoplasm {ECO:0000256|PIRNR:PIRNR037756}.
B4E3I9	NA	Evidence at transcript level	GO:0033588; GO:0005737; GO:0016301; GO:0005634; GO:0006355; GO:0002098; GO:0006351		SUBCELLULAR LOCATION: Cytoplasm {ECO:0000256|PIRNR:PIRNR017233}. Nucleus {ECO:0000256|PIRNR:PIRNR017233}.
B4E3L5	NA	Evidence at transcript level	GO:0003677; GO:0005737; GO:0005634; GO:0003700; GO:0005667; GO:0006351		SUBCELLULAR LOCATION: Nucleus {ECO:0000256|SAAS:SAAS00600858}.
B4E3R5	NA	Evidence at transcript level	GO:0030284; GO:0005634; GO:0043565; GO:0005496; GO:0003700; GO:0006351; GO:0008270		SUBCELLULAR LOCATION: Nucleus {ECO:0000256|PIRNR:PIRNR002527, ECO:0000256|SAAS:SAAS00595767}.
B5BTZ6	STAT3	Evidence at transcript level	GO:0003677; GO:0005737; GO:0005634; GO:0004871; GO:0003700; GO:0006351		SUBCELLULAR LOCATION: Cytoplasm {ECO:0000256|RuleBase:RU046415}.; SUBCELLULAR LOCATION: Nucleus {ECO:0000256|RuleBase:RU046415}.
B5BU61	HDAC1	Evidence at transcript level	GO:0032041; GO:0005634; GO:0006355; GO:0006351		SUBCELLULAR LOCATION: Nucleus {ECO:0000256|PIRNR:PIRNR037913}.
B5BU77	PRKCH	Evidence at transcript level	GO:0005524; GO:0030154; GO:0005737; GO:0035556; GO:0046872; GO:0004697		SUBCELLULAR LOCATION: Cytoplasm {ECO:0000256|PIRNR:PIRNR000551}.
B5BUB1	RUVBL1	Evidence at transcript level	GO:0005524; GO:0043141; GO:0006310; GO:0006281; GO:0005634; GO:0006355; GO:0006351		SUBCELLULAR LOCATION: Nucleus {ECO:0000256|RuleBase:RU363048, ECO:0000256|SAAS:SAAS00339597}.
B5LY05	ESR1	Evidence at transcript level	GO:0005634; GO:0043565; GO:0043401; GO:0003700; GO:0006351; GO:0008270		SUBCELLULAR LOCATION: Nucleus {ECO:0000256|SAAS:SAAS00595767}.
B5MBY7	NR1H3	Evidence at protein level	GO:0005634; GO:0043565; GO:0003707; GO:0003700; GO:0006351; GO:0008270		SUBCELLULAR LOCATION: Nucleus {ECO:0000256|SAAS:SAAS00595767}.
B5MCF9	PES1	Evidence at protein level	GO:0005694; GO:0005737; GO:0000466; GO:0000463; GO:0005730; GO:0005654; GO:0005634; GO:0030687; GO:0043021		SUBCELLULAR LOCATION: Nucleus, nucleolus {ECO:0000256|HAMAP-Rule:MF_03028}. Nucleus, nucleoplasm {ECO:0000256|HAMAP-Rule:MF_03028}. Chromosome {ECO:0000256|HAMAP-Rule:MF_03028}. Note=Appears to localize to the periphery of metaphase chromosomes during mitosis and to the prenucleolar bodies that form in mitotic cells prior to the actual nucleoli. {ECO:0000256|HAMAP-Rule:MF_03028}.; SUBCELLULAR LOC…
B5MCM0	TEAD3	Evidence at protein level	GO:0003677; GO:0035329; GO:0005634; GO:0003700; GO:0006351		SUBCELLULAR LOCATION: Nucleus {ECO:0000256|PIRNR:PIRNR002603}.
B5MCT2	ETV1	Evidence at protein level	GO:0005634; GO:0048935; GO:0043565; GO:0003700; GO:0006366		SUBCELLULAR LOCATION: Nucleus {ECO:0000256|SAAS:SAAS00594387}.
B5MD17	CBX1	Evidence at protein level	GO:0005634		SUBCELLULAR LOCATION: Nucleus {ECO:0000256|SAAS:SAAS00539054}.
B5MDF5	RAN	Evidence at protein level	GO:0005525; GO:0003924; GO:0006886; GO:0006913; GO:0005634; GO:0007264		SUBCELLULAR LOCATION: Nucleus {ECO:0000256|RuleBase:RU363057}.
B5MDW0	ERG	Evidence at protein level	GO:0005634; GO:0043565; GO:0003700		SUBCELLULAR LOCATION: Nucleus {ECO:0000256|SAAS:SAAS00594387}.
B5ME19	EIF3CL	Inferred from homology	GO:0016282; GO:0033290; GO:0005852; GO:0001731; GO:0006446; GO:0003743; GO:0031369; GO:0006413		SUBCELLULAR LOCATION: Cytoplasm {ECO:0000250}.
B5ME60	POU2F2	Evidence at protein level	GO:0005634; GO:0043565; GO:0003700; GO:0006351		SUBCELLULAR LOCATION: Nucleus {ECO:0000256|RuleBase:RU361194, ECO:0000256|SAAS:SAAS00553137}.
B5TKC0	ESR1	Evidence at transcript level	GO:0005634; GO:0043565; GO:0043401; GO:0003700; GO:0006351; GO:0008270		SUBCELLULAR LOCATION: Nucleus {ECO:0000256|SAAS:SAAS00595767}.
B5TKC1	ESR1	Evidence at transcript level	GO:0005634; GO:0043565; GO:0003700; GO:0006351; GO:0008270		SUBCELLULAR LOCATION: Nucleus {ECO:0000256|SAAS:SAAS00586772}.
B5TKC2	ESR1	Evidence at transcript level	GO:0005634; GO:0043565; GO:0043401; GO:0003700; GO:0006351; GO:0008270		SUBCELLULAR LOCATION: Nucleus {ECO:0000256|SAAS:SAAS00595767}.
B5TZ77	ESR1	Evidence at transcript level	GO:0005634; GO:0043565; GO:0003700; GO:0006351; GO:0008270		SUBCELLULAR LOCATION: Nucleus {ECO:0000256|SAAS:SAAS00586772}.
B5TZ78	ESR1	Evidence at transcript level	GO:0005634; GO:0043565; GO:0003700; GO:0006351; GO:0008270		SUBCELLULAR LOCATION: Nucleus {ECO:0000256|SAAS:SAAS00586772}.
B5TZ79	ESR1	Evidence at transcript level	GO:0005634; GO:0043565; GO:0043401; GO:0003700; GO:0006351; GO:0008270		SUBCELLULAR LOCATION: Nucleus {ECO:0000256|SAAS:SAAS00595767}.
B5TZ80	ESR1	Evidence at transcript level	GO:0005634; GO:0043565; GO:0003700; GO:0006351; GO:0008270		SUBCELLULAR LOCATION: Nucleus {ECO:0000256|SAAS:SAAS00586772}.
B5TZ81	ESR1	Evidence at transcript level	GO:0005634; GO:0043565; GO:0003700; GO:0006351; GO:0008270		SUBCELLULAR LOCATION: Nucleus {ECO:0000256|SAAS:SAAS00586772}.
B5TZ82	ESR1	Evidence at transcript level	GO:0005634; GO:0043565; GO:0043401; GO:0003700; GO:0006351; GO:0008270		SUBCELLULAR LOCATION: Nucleus {ECO:0000256|SAAS:SAAS00586772}.
B5TZ83	ESR1	Evidence at transcript level	GO:0005634; GO:0043565; GO:0003700; GO:0006351; GO:0008270		SUBCELLULAR LOCATION: Nucleus {ECO:0000256|SAAS:SAAS00586772}.
B6DP71	ESR1	Evidence at transcript level	GO:0005634; GO:0043565; GO:0003700; GO:0006351; GO:0008270		SUBCELLULAR LOCATION: Nucleus {ECO:0000256|SAAS:SAAS00586772}.
B6DP72	ESR1	Evidence at transcript level	GO:0005634; GO:0043565; GO:0043401; GO:0003700; GO:0006351; GO:0008270		SUBCELLULAR LOCATION: Nucleus {ECO:0000256|SAAS:SAAS00586772}.
B6DP73	ESR1	Evidence at transcript level	GO:0005634; GO:0043565; GO:0003700; GO:0006351; GO:0008270		SUBCELLULAR LOCATION: Nucleus {ECO:0000256|SAAS:SAAS00586772}.
B6DU66	ESR1	Evidence at transcript level	GO:0005634; GO:0006355; GO:0043401; GO:0006351		SUBCELLULAR LOCATION: Nucleus {ECO:0000256|SAAS:SAAS00595767}.
B6DU67	ESR1	Evidence at transcript level	GO:0005634; GO:0043565; GO:0003700; GO:0006351; GO:0008270		SUBCELLULAR LOCATION: Nucleus {ECO:0000256|SAAS:SAAS00586772}.
B6DU68	ESR1	Evidence at transcript level	GO:0005634; GO:0043565; GO:0003707; GO:0003700; GO:0006351; GO:0008270		SUBCELLULAR LOCATION: Nucleus {ECO:0000256|SAAS:SAAS00595767}.
B6DU69	ESR1	Evidence at transcript level	GO:0005634; GO:0043565; GO:0003700; GO:0006351; GO:0008270		SUBCELLULAR LOCATION: Nucleus {ECO:0000256|SAAS:SAAS00586772}.
B6DU70	ESR1	Evidence at transcript level	GO:0005634; GO:0043565; GO:0003700; GO:0006351; GO:0008270		SUBCELLULAR LOCATION: Nucleus {ECO:0000256|SAAS:SAAS00586772}.
B6E4X6	NA	Evidence at transcript level	GO:0006915; GO:0007049; GO:0005737; GO:0046872; GO:0005634; GO:0051262; GO:0003700; GO:0044212; GO:0006351		SUBCELLULAR LOCATION: Cytoplasm {ECO:0000256|RuleBase:RU003304}. Nucleus {ECO:0000256|RuleBase:RU003304}.
B6ZGR6	NR1A1	Evidence at transcript level	GO:0005634; GO:0043565; GO:0003707; GO:0004887; GO:0006351; GO:0008270		SUBCELLULAR LOCATION: Nucleus {ECO:0000256|SAAS:SAAS00595767}.
B6ZGR7	NR1A2	Evidence at transcript level	GO:0005634; GO:0043565; GO:0043401; GO:0004887; GO:0006351; GO:0008270		SUBCELLULAR LOCATION: Nucleus {ECO:0000256|SAAS:SAAS00595767}.
B6ZGR8	NR1B2	Evidence at transcript level	GO:0005634; GO:0003708; GO:0043565; GO:0003707; GO:0006351; GO:0008270		SUBCELLULAR LOCATION: Nucleus {ECO:0000256|SAAS:SAAS00595767}.
B6ZGS2	NR1C3	Evidence at transcript level	GO:0004879; GO:0005634; GO:0043565; GO:0003707; GO:0006351; GO:0008270		SUBCELLULAR LOCATION: Nucleus {ECO:0000256|SAAS:SAAS00595767}.
B6ZGS3	NR1D2	Evidence at transcript level	GO:0005634; GO:0043565; GO:0003707; GO:0003700; GO:0006351; GO:0008270		SUBCELLULAR LOCATION: Nucleus {ECO:0000256|SAAS:SAAS00595767}.
B6ZGS4	NR1F1	Evidence at transcript level	GO:0004879; GO:0005634; GO:0043565; GO:0003707; GO:0006351; GO:0008270		SUBCELLULAR LOCATION: Nucleus {ECO:0000256|SAAS:SAAS00595767}.
B6ZGS5	NR1F2	Evidence at transcript level	GO:0004879; GO:0005634; GO:0043565; GO:0003707; GO:0006351; GO:0008270		SUBCELLULAR LOCATION: Nucleus {ECO:0000256|SAAS:SAAS00595767}.
B6ZGS6	NR1F3	Evidence at transcript level	GO:0004879; GO:0043231; GO:0005730; GO:0043565; GO:0003707; GO:0006351; GO:0008270		SUBCELLULAR LOCATION: Nucleus {ECO:0000256|SAAS:SAAS00595767}.
B6ZGS7	NR1H2	Evidence at transcript level	GO:0005634; GO:0043565; GO:0003707; GO:0003700; GO:0006351; GO:0008270		SUBCELLULAR LOCATION: Nucleus {ECO:0000256|SAAS:SAAS00595767}.
B6ZGS8	NR1H3	Evidence at transcript level	GO:0005634; GO:0043565; GO:0003707; GO:0003700; GO:0006351; GO:0008270		SUBCELLULAR LOCATION: Nucleus {ECO:0000256|SAAS:SAAS00595767}.
B6ZGS9	NR1H4	Evidence at transcript level	GO:0005634; GO:0043565; GO:0003707; GO:0004887; GO:0006351; GO:0008270		SUBCELLULAR LOCATION: Nucleus {ECO:0000256|SAAS:SAAS00595767}.
B6ZGT0	NR1I1	Evidence at transcript level	GO:0008434; GO:0005634; GO:0043565; GO:0003707; GO:0006351; GO:0008270		SUBCELLULAR LOCATION: Nucleus {ECO:0000256|SAAS:SAAS00595767}.
B6ZGT1	NR1I2	Evidence at transcript level	GO:0005634; GO:0043565; GO:0003707; GO:0003700; GO:0006351; GO:0008270		SUBCELLULAR LOCATION: Nucleus {ECO:0000256|SAAS:SAAS00595767}.
B6ZGT2	NR1I3	Evidence at transcript level	GO:0005634; GO:0043565; GO:0003707; GO:0003700; GO:0006351; GO:0008270		SUBCELLULAR LOCATION: Nucleus {ECO:0000256|SAAS:SAAS00595767}.
B6ZGT3	NR2A1	Evidence at transcript level	GO:0004879; GO:0005634; GO:0043565; GO:0003707; GO:0006351; GO:0008270		SUBCELLULAR LOCATION: Nucleus {ECO:0000256|SAAS:SAAS00595767}.
B6ZGT4	NR2A3	Evidence at transcript level	GO:0004879; GO:0005634; GO:0043565; GO:0003707; GO:0006351; GO:0008270		SUBCELLULAR LOCATION: Nucleus {ECO:0000256|SAAS:SAAS00595767}.
B6ZGT6	NR2B3	Evidence at transcript level	GO:0005634; GO:0043565; GO:0003707; GO:0003700; GO:0006351; GO:0008270		SUBCELLULAR LOCATION: Nucleus {ECO:0000256|SAAS:SAAS00595767}.
B6ZGT7	NR2C1	Evidence at transcript level	GO:0005634; GO:0043565; GO:0043401; GO:0003700; GO:0006351; GO:0008270		SUBCELLULAR LOCATION: Nucleus {ECO:0000256|SAAS:SAAS00595767}.
B6ZGT9	NR2E1	Evidence at transcript level	GO:0005634; GO:0043565; GO:0003707; GO:0003700; GO:0006351; GO:0008270		SUBCELLULAR LOCATION: Nucleus {ECO:0000256|SAAS:SAAS00595767}.
B6ZGU2	NR2F6	Evidence at transcript level	GO:0004879; GO:0005634; GO:0043565; GO:0003707; GO:0006351; GO:0008270		SUBCELLULAR LOCATION: Nucleus {ECO:0000256|SAAS:SAAS00595767}.
B6ZGU3	NR3A1	Evidence at transcript level	GO:0030284; GO:0005634; GO:0043565; GO:0005496; GO:0003700; GO:0006351; GO:0008270		SUBCELLULAR LOCATION: Nucleus {ECO:0000256|PIRNR:PIRNR002527, ECO:0000256|SAAS:SAAS00595767}.
B6ZGU5	NR3B3	Evidence at transcript level	GO:0005634; GO:0003708; GO:0043565; GO:0005496; GO:0003707; GO:0006351; GO:0008270		SUBCELLULAR LOCATION: Nucleus {ECO:0000256|PIRNR:PIRNR002527, ECO:0000256|SAAS:SAAS00595767}.
B6ZGU6	NR3C1	Evidence at transcript level	GO:0004883; GO:0005634; GO:0043565; GO:0005496; GO:0003700; GO:0006351; GO:0008270		SUBCELLULAR LOCATION: Nucleus {ECO:0000256|SAAS:SAAS00595767}.
B6ZGU8	NR5A1	Evidence at transcript level	GO:0005634; GO:0043565; GO:0003707; GO:0003700; GO:0006351; GO:0008270		SUBCELLULAR LOCATION: Nucleus {ECO:0000256|SAAS:SAAS00595767}.
B6ZGU9	NR5A2	Evidence at transcript level	GO:0005634; GO:0043565; GO:0003707; GO:0003700; GO:0006351; GO:0008270		SUBCELLULAR LOCATION: Nucleus {ECO:0000256|SAAS:SAAS00595767}.
B7Z1C9	CCT7	Evidence at transcript level	GO:0005524; GO:0005737; GO:0006457		SUBCELLULAR LOCATION: Cytoplasm {ECO:0000256|SAAS:SAAS00547836}.
B7Z1I8	NA	Evidence at transcript level	GO:0003677; GO:0005634; GO:0003700; GO:0005667; GO:0006351		SUBCELLULAR LOCATION: Nucleus {ECO:0000256|RuleBase:RU003796}.
B7Z1K5	NA	Evidence at transcript level	GO:0005525; GO:0003924; GO:0005737; GO:0005874; GO:0007017; GO:0005200		SUBCELLULAR LOCATION: Cytoplasm, cytoskeleton {ECO:0000256|SAAS:SAAS00392180}.
B7Z1R4	NA	Evidence at transcript level	GO:0005634; GO:0048935; GO:0043565; GO:0003700; GO:0006366		SUBCELLULAR LOCATION: Nucleus {ECO:0000256|SAAS:SAAS00594387}.
B7Z1U7	RBFOX1	Evidence at transcript level	GO:0003723; GO:0008380; GO:0005737; GO:0006397; GO:0050885; GO:0000166; GO:0005634; GO:0000381; GO:2001014		SUBCELLULAR LOCATION: Nucleus {ECO:0000256|PIRNR:PIRNR037932}.
B7Z272	NA	Evidence at transcript level	GO:0003677; GO:0005634; GO:0006355		SUBCELLULAR LOCATION: Nucleus {ECO:0000256|SAAS:SAAS00563020}.
B7Z2C9	NA	Evidence at transcript level	GO:0005634; GO:0048935; GO:0043565; GO:0003700; GO:0006366		SUBCELLULAR LOCATION: Nucleus {ECO:0000256|SAAS:SAAS00594387}.
B7Z2F4	NA	Evidence at transcript level	GO:0005524; GO:0005737; GO:0006457		SUBCELLULAR LOCATION: Cytoplasm {ECO:0000256|SAAS:SAAS00547836}.
B7Z2H6	NA	Evidence at transcript level	GO:0003677; GO:0005737; GO:0005634; GO:0003700; GO:0005667; GO:0006351		SUBCELLULAR LOCATION: Nucleus {ECO:0000256|SAAS:SAAS00600858}.
B7Z2M4	NA	Evidence at transcript level	GO:0003677; GO:0006260; GO:0005634; GO:0000808		SUBCELLULAR LOCATION: Nucleus {ECO:0000256|PIRNR:PIRNR007858}.
B7Z2Z8	NA	Evidence at transcript level	GO:0005524; GO:0005737; GO:0006457		SUBCELLULAR LOCATION: Cytoplasm {ECO:0000256|SAAS:SAAS00547836}.
B7Z355	NA	Evidence at transcript level	GO:0016829; GO:0003676; GO:0006388; GO:0000213; GO:0000214		SUBCELLULAR LOCATION: Nucleus {ECO:0000256|PIRNR:PIRNR011789}.
B7Z3E4	NA	Evidence at transcript level	GO:0005634; GO:0043565; GO:0043401; GO:0003700; GO:0006351; GO:0008270		SUBCELLULAR LOCATION: Nucleus {ECO:0000256|SAAS:SAAS00586772}.
B7Z3G7	NA	Evidence at transcript level	GO:0003677; GO:0005634; GO:0006355		SUBCELLULAR LOCATION: Nucleus {ECO:0000256|SAAS:SAAS00563020}.
B7Z3I4	CHD2	Evidence at protein level	GO:0001046; GO:0004386; GO:0005634; GO:0006355		SUBCELLULAR LOCATION: Nucleus {ECO:0000256|SAAS:SAAS00539527}.
B7Z3M5	RPS3A	Evidence at transcript level	GO:0030154; GO:0022627; GO:0005634; GO:0003735; GO:0006412		SUBCELLULAR LOCATION: Cytoplasm {ECO:0000256|HAMAP-Rule:MF_03122}. Nucleus {ECO:0000256|HAMAP-Rule:MF_03122}. Note=Localized in cytoplasmic mRNP granules containing untranslated mRNAs. {ECO:0000256|HAMAP-Rule:MF_03122}.
B7Z3M6	NA	Evidence at transcript level	GO:0009298; GO:0005737; GO:0004615		SUBCELLULAR LOCATION: Cytoplasm {ECO:0000256|RuleBase:RU361118}.
B7Z3U7	NA	Evidence at transcript level	GO:0003676; GO:0005634; GO:0008270		SUBCELLULAR LOCATION: Nucleus {ECO:0000256|SAAS:SAAS00591741}.
B7Z419	NA	Evidence at transcript level	GO:0009298; GO:0005737; GO:0004615		SUBCELLULAR LOCATION: Cytoplasm {ECO:0000256|RuleBase:RU361118}.
B7Z423	NA	Evidence at transcript level	GO:0005634; GO:0043565; GO:0003707; GO:0004887; GO:0006351; GO:0008270		SUBCELLULAR LOCATION: Nucleus {ECO:0000256|SAAS:SAAS00595767}.
B7Z4A9	NA	Evidence at transcript level	GO:0005634; GO:0043565; GO:0003700		SUBCELLULAR LOCATION: Nucleus {ECO:0000256|RuleBase:RU000682}.
B7Z4B3	NA	Evidence at transcript level	GO:0003677; GO:0005634; GO:0006355		SUBCELLULAR LOCATION: Nucleus {ECO:0000256|SAAS:SAAS00563020}.
B7Z4B4	NA	Evidence at transcript level	GO:0005634; GO:0003708; GO:0043565; GO:0003707; GO:0006351; GO:0008270		SUBCELLULAR LOCATION: Nucleus {ECO:0000256|SAAS:SAAS00595767}.
B7Z4D9	NA	Evidence at transcript level	GO:0004402; GO:0005634; GO:0003700; GO:0008270		SUBCELLULAR LOCATION: Nucleus {ECO:0000256|RuleBase:RU361211}.
B7Z4K0	NA	Evidence at transcript level	GO:0003677; GO:0005634; GO:0003700; GO:0006351		SUBCELLULAR LOCATION: Nucleus {ECO:0000256|SAAS:SAAS00353240}.
B7Z4N1	NA	Evidence at transcript level	GO:0005525; GO:0003924; GO:0005737; GO:0005874; GO:0007017; GO:0005200		SUBCELLULAR LOCATION: Cytoplasm, cytoskeleton {ECO:0000256|SAAS:SAAS00045381}.
B7Z4Q7	ATAT1	Evidence at transcript level	GO:0071929; GO:0030424; GO:0005905; GO:0005737; GO:0005925; GO:0005874; GO:0048666; GO:0070507; GO:0005819; GO:0019799		SUBCELLULAR LOCATION: Cytoplasm {ECO:0000256|HAMAP-Rule:MF_03130}. Membrane, clathrin-coated pit {ECO:0000256|HAMAP-Rule:MF_03130}. Cell junction, focal adhesion {ECO:0000256|HAMAP-Rule:MF_03130}. Cell projection, axon {ECO:0000256|HAMAP-Rule:MF_03130}. Cytoplasm, cytoskeleton {ECO:0000256|HAMAP-Rule:MF_03130}. Cytoplasm, cytoskeleton, spindle {ECO:0000256|HAMAP-Rule:MF_03130}.
B7Z4R3	NA	Evidence at transcript level	GO:0005524; GO:0005737; GO:0006457		SUBCELLULAR LOCATION: Cytoplasm {ECO:0000256|SAAS:SAAS00547836}.
B7Z4T4	NA	Evidence at transcript level	GO:0005634; GO:0003708; GO:0043565; GO:0003707; GO:0006351; GO:0008270		SUBCELLULAR LOCATION: Nucleus {ECO:0000256|SAAS:SAAS00595767}.
B7Z4T6	NA	Evidence at transcript level	GO:0003677; GO:0006260; GO:0005634; GO:0003700; GO:0006351		SUBCELLULAR LOCATION: Nucleus {ECO:0000256|RuleBase:RU000690, ECO:0000256|SAAS:SAAS00573677}.
B7Z569	NA	Evidence at transcript level	GO:0003677; GO:0000278; GO:0005634; GO:0003713; GO:0003700; GO:0005667; GO:0006351		SUBCELLULAR LOCATION: Nucleus {ECO:0000256|RuleBase:RU003796}.
B7Z5C8	ATAT1	Evidence at transcript level	GO:0071929; GO:0030424; GO:0005905; GO:0005737; GO:0005925; GO:0005874; GO:0048666; GO:0070507; GO:0005819; GO:0019799		SUBCELLULAR LOCATION: Cytoplasm {ECO:0000256|HAMAP-Rule:MF_03130}. Membrane, clathrin-coated pit {ECO:0000256|HAMAP-Rule:MF_03130}. Cell junction, focal adhesion {ECO:0000256|HAMAP-Rule:MF_03130}. Cell projection, axon {ECO:0000256|HAMAP-Rule:MF_03130}. Cytoplasm, cytoskeleton {ECO:0000256|HAMAP-Rule:MF_03130}. Cytoplasm, cytoskeleton, spindle {ECO:0000256|HAMAP-Rule:MF_03130}.
B7Z5E7	NA	Evidence at transcript level	GO:0005524; GO:0005737; GO:0006457		SUBCELLULAR LOCATION: Cytoplasm {ECO:0000256|SAAS:SAAS00547836}.
B7Z5E9	NA	Evidence at transcript level	GO:0003677; GO:0005634; GO:0006355; GO:0003707; GO:0006351		SUBCELLULAR LOCATION: Nucleus {ECO:0000256|SAAS:SAAS00595767}.
B7Z5F4	ETV4	Evidence at protein level	GO:0005730; GO:0043565; GO:0003700		SUBCELLULAR LOCATION: Nucleus {ECO:0000256|SAAS:SAAS00594387}.
B7Z5N5	SMAD2	Evidence at protein level	GO:0003677; GO:0005737; GO:0016021; GO:0005634; GO:0003700; GO:0005667; GO:0006351; GO:0007179		SUBCELLULAR LOCATION: Cytoplasm {ECO:0000256|RuleBase:RU361195}. Nucleus {ECO:0000256|RuleBase:RU361195}.; SUBCELLULAR LOCATION: Nucleus {ECO:0000256|SAAS:SAAS00573677}.	TRANSMEM 403 427 Helical. {ECO:0000256|SAM:Phobius}.
B7Z5Q0	NA	Evidence at transcript level	GO:0005634; GO:0043565; GO:0003700		SUBCELLULAR LOCATION: Nucleus {ECO:0000256|RuleBase:RU000682}.
B7Z5U7	NA	Evidence at transcript level	GO:0004879; GO:0005634; GO:0043565; GO:0003707; GO:0006351; GO:0008270		SUBCELLULAR LOCATION: Nucleus {ECO:0000256|SAAS:SAAS00595767}.
B7Z5W6	NA	Evidence at transcript level	GO:0003677; GO:0005634; GO:0003700; GO:0006351		SUBCELLULAR LOCATION: Nucleus {ECO:0000256|SAAS:SAAS00353240}.
B7Z5X5	NA	Evidence at transcript level	GO:0003677; GO:0005634; GO:0003700; GO:0006351		SUBCELLULAR LOCATION: Nucleus {ECO:0000256|SAAS:SAAS00353240}.
B7Z619	NA	Evidence at transcript level	GO:0003677; GO:0005634; GO:0003700; GO:0006351		SUBCELLULAR LOCATION: Nucleus {ECO:0000256|SAAS:SAAS00353240}.
B7Z6A1	NA	Evidence at transcript level	GO:0009298; GO:0005737; GO:0004615		SUBCELLULAR LOCATION: Cytoplasm {ECO:0000256|RuleBase:RU361118}.
B7Z6A9	NA	Evidence at transcript level	GO:0005737; GO:0008270		SUBCELLULAR LOCATION: Cytoplasm {ECO:0000256|PIRNR:PIRNR038204}.
B7Z6F6	NA	Evidence at transcript level	GO:0003677; GO:0005634; GO:0006355		SUBCELLULAR LOCATION: Nucleus {ECO:0000256|SAAS:SAAS00563020}.
B7Z6J2	NA	Evidence at transcript level	GO:0005634; GO:0043565; GO:0043401; GO:0003700; GO:0006351; GO:0008270		SUBCELLULAR LOCATION: Nucleus {ECO:0000256|SAAS:SAAS00586772}.
B7Z6N1	NA	Evidence at transcript level	GO:0005794; GO:0000122; GO:0005634; GO:0043565; GO:0003714; GO:0003700		SUBCELLULAR LOCATION: Nucleus {ECO:0000256|SAAS:SAAS00594387}.
B7Z6W3	NA	Evidence at transcript level	GO:0005634; GO:0003708; GO:0043565; GO:0003707; GO:0006351; GO:0008270		SUBCELLULAR LOCATION: Nucleus {ECO:0000256|SAAS:SAAS00595767}.
B7Z6X3	NA	Evidence at transcript level	GO:0005634; GO:0043565; GO:0003707; GO:0003700; GO:0006351; GO:0008270		SUBCELLULAR LOCATION: Nucleus {ECO:0000256|SAAS:SAAS00595767}.
B7Z720	ELF2	Evidence at transcript level	GO:0005634; GO:0043565; GO:0003700		SUBCELLULAR LOCATION: Nucleus {ECO:0000256|SAAS:SAAS00594387}.
B7Z774	NA	Evidence at transcript level	GO:0005634; GO:0043565; GO:0003700		SUBCELLULAR LOCATION: Nucleus {ECO:0000256|RuleBase:RU000682}.
B7Z789	NA	Evidence at transcript level	GO:0003677; GO:0005634; GO:0003700		SUBCELLULAR LOCATION: Nucleus {ECO:0000256|RuleBase:RU000682}.
B7Z7I2	NA	Evidence at transcript level	GO:0005634; GO:0043565; GO:0003707; GO:0003700; GO:0006351; GO:0008270		SUBCELLULAR LOCATION: Nucleus {ECO:0000256|SAAS:SAAS00595767}.
B7Z7I4	NA	Evidence at transcript level	GO:0005524; GO:0005737; GO:0006457		SUBCELLULAR LOCATION: Cytoplasm {ECO:0000256|SAAS:SAAS00547836}.
B7Z7J5	NA	Evidence at transcript level	GO:0005634; GO:0043565; GO:0003707; GO:0003700; GO:0006351; GO:0008270		SUBCELLULAR LOCATION: Nucleus {ECO:0000256|SAAS:SAAS00595767}.
B7Z852	NA	Evidence at transcript level	GO:0005694; GO:0018024; GO:0005634; GO:0008270		SUBCELLULAR LOCATION: Chromosome {ECO:0000256|SAAS:SAAS00563877}.; SUBCELLULAR LOCATION: Nucleus {ECO:0000256|RuleBase:RU004542, ECO:0000256|SAAS:SAAS00563921}.
B7Z8M6	NA	Evidence at transcript level	GO:0003677; GO:0005634; GO:0006355; GO:0006351		SUBCELLULAR LOCATION: Nucleus {ECO:0000256|SAAS:SAAS00573650}.
B7Z8P7	NA	Evidence at transcript level	GO:0005737; GO:0097056; GO:0000049; GO:0016785; GO:0006412		SUBCELLULAR LOCATION: Cytoplasm {ECO:0000256|PIRNR:PIRNR017689}.
B7Z8Q3	NA	Evidence at transcript level	GO:0005634; GO:0043565; GO:0003707; GO:0004887; GO:0006351; GO:0008270		SUBCELLULAR LOCATION: Nucleus {ECO:0000256|SAAS:SAAS00595767}.
B7Z8R4	NA	Evidence at transcript level	GO:0005634; GO:0043565; GO:0003700		SUBCELLULAR LOCATION: Nucleus {ECO:0000256|SAAS:SAAS00594387}.
B7Z8R7	NR1I3	Evidence at transcript level	GO:0005654; GO:0043565; GO:0003707; GO:0003700; GO:0006351; GO:0008270		SUBCELLULAR LOCATION: Nucleus {ECO:0000256|SAAS:SAAS00595767}.
B7Z8X6	NA	Evidence at transcript level	GO:0006915; GO:0007049; GO:0005737; GO:0032502; GO:0046872; GO:0005634; GO:0051262; GO:0003700; GO:0044212; GO:0006351		SUBCELLULAR LOCATION: Cytoplasm {ECO:0000256|RuleBase:RU003304}. Nucleus {ECO:0000256|RuleBase:RU003304}.
B7Z8Z6	NA	Evidence at transcript level	GO:0005524; GO:0003677; GO:0003678; GO:0006270; GO:0042555; GO:0005634		SUBCELLULAR LOCATION: Nucleus {ECO:0000256|SAAS:SAAS00534438}.
B7Z922	NA	Evidence at transcript level	GO:0009298; GO:0005737; GO:0004615		SUBCELLULAR LOCATION: Cytoplasm {ECO:0000256|RuleBase:RU361118}.
B7Z934	EBF2	Evidence at transcript level	GO:0003677; GO:0046872; GO:0007275; GO:0005634; GO:0006355; GO:0006351		SUBCELLULAR LOCATION: Nucleus {ECO:0000256|RuleBase:RU004489}.
B7Z9L0	NA	Evidence at transcript level	GO:0005524; GO:0005737; GO:0006457		SUBCELLULAR LOCATION: Cytoplasm {ECO:0000256|SAAS:SAAS00547836}.
B7Z9N6	NA	Evidence at transcript level	GO:0003677; GO:0005634; GO:0006355		SUBCELLULAR LOCATION: Nucleus {ECO:0000256|SAAS:SAAS00563020}.
B7ZA24	NA	Evidence at transcript level	GO:0003677; GO:0005737; GO:0005634; GO:0004871; GO:0003700; GO:0006351	SIGNAL 1 25 {ECO:0000256|SAM:SignalP}.	SUBCELLULAR LOCATION: Cytoplasm {ECO:0000256|RuleBase:RU046415}.; SUBCELLULAR LOCATION: Nucleus {ECO:0000256|RuleBase:RU046415}.
B7ZA52	NA	Evidence at transcript level	GO:0006914; GO:0004197; GO:0005737; GO:0015031		SUBCELLULAR LOCATION: Cytoplasm {ECO:0000256|SAAS:SAAS00570686}.
B7ZAC1	NA	Evidence at transcript level	GO:0003677; GO:0005737; GO:0005634; GO:0004871; GO:0003700; GO:0006351		SUBCELLULAR LOCATION: Cytoplasm {ECO:0000256|RuleBase:RU046415}.; SUBCELLULAR LOCATION: Nucleus {ECO:0000256|RuleBase:RU046415}.
B7ZAF3	NA	Evidence at transcript level	GO:0003677; GO:0005634; GO:0006355		SUBCELLULAR LOCATION: Nucleus {ECO:0000256|SAAS:SAAS00563020}.
B7ZAR1	CCT5	Evidence at protein level	GO:0005524; GO:0005737; GO:0005730; GO:0006457		SUBCELLULAR LOCATION: Cytoplasm {ECO:0000256|SAAS:SAAS00547836}.
B7ZAX9	NA	Evidence at transcript level	GO:0005524; GO:0043044; GO:0016887; GO:0003677; GO:0016589		SUBCELLULAR LOCATION: Nucleus {ECO:0000256|SAAS:SAAS00548613}.
B7ZAY9	NA	Evidence at transcript level	GO:0006914; GO:0008234; GO:0005737; GO:0015031		SUBCELLULAR LOCATION: Cytoplasm {ECO:0000256|SAAS:SAAS00570686}.
B7ZBM3	FOXP4	Evidence at protein level	GO:0005634; GO:0043565; GO:0003700; GO:0006351		SUBCELLULAR LOCATION: Nucleus {ECO:0000256|SAAS:SAAS00582275}.
B7ZBP7	PTPA	Evidence at protein level	GO:0005737; GO:0003755; GO:0019211		SUBCELLULAR LOCATION: Cytoplasm {ECO:0000256|RuleBase:RU361210}.
B7ZBP9	PTPA	Evidence at protein level	GO:0005737; GO:0003755; GO:0019211		SUBCELLULAR LOCATION: Cytoplasm {ECO:0000256|RuleBase:RU361210}.
B7ZBQ0	PTPA	Evidence at protein level	GO:0005737; GO:0003755; GO:0019211		SUBCELLULAR LOCATION: Cytoplasm {ECO:0000256|RuleBase:RU361210}.
B7ZKX2	NA	Evidence at transcript level	GO:0046872; GO:0003676; GO:0005634; GO:0003700; GO:0006351		SUBCELLULAR LOCATION: Nucleus {ECO:0000256|SAAS:SAAS00574784}.
B7ZLG1	FOXP3	Evidence at protein level	GO:0002361; GO:0046872; GO:0005634; GO:0043565; GO:0003700; GO:0006351		SUBCELLULAR LOCATION: Nucleus {ECO:0000256|SAAS:SAAS00582275}.
B7ZLH2	LMX1B	Evidence at protein level	GO:0005634; GO:0006355; GO:0043565; GO:0008270		SUBCELLULAR LOCATION: Nucleus {ECO:0000256|RuleBase:RU000682, ECO:0000256|SAAS:SAAS00397436}.
B7ZLK5	FOXP2	Evidence at transcript level	GO:0005634; GO:0043565; GO:0003700; GO:0006351		SUBCELLULAR LOCATION: Nucleus {ECO:0000256|SAAS:SAAS00582275}.
B7ZLQ5	SMARCA1	Evidence at protein level	GO:0005524; GO:0043044; GO:0016887; GO:0003677; GO:0016589; GO:0007420; GO:0030182; GO:0000790; GO:2000177		SUBCELLULAR LOCATION: Nucleus {ECO:0000256|SAAS:SAAS00548613}.
B7ZLZ7	SMC2	Evidence at transcript level	GO:0005524; GO:0000796; GO:0007076; GO:0005634		SUBCELLULAR LOCATION: Nucleus {ECO:0000256|PIRNR:PIRNR005719}.
B7ZM63	JMJD2B	Evidence at transcript level	GO:0005634; GO:0008270		SUBCELLULAR LOCATION: Nucleus {ECO:0000256|SAAS:SAAS00575847}.
B7ZM83	ZFHX2	Evidence at transcript level	GO:0046872; GO:0005634; GO:0006355; GO:0043565		SUBCELLULAR LOCATION: Nucleus {ECO:0000256|RuleBase:RU000682}.
B7ZMC8	BARHL1	Evidence at transcript level	GO:0005634; GO:0006355; GO:0043565		SUBCELLULAR LOCATION: Nucleus {ECO:0000256|RuleBase:RU000682, ECO:0000256|SAAS:SAAS00544279}.
B7ZMD4	ETV2	Evidence at transcript level	GO:0005634; GO:0043565; GO:0003700		SUBCELLULAR LOCATION: Nucleus {ECO:0000256|SAAS:SAAS00594387}.
B7ZML1	CHD9	Evidence at transcript level	GO:0005524; GO:0016817; GO:0005634		SUBCELLULAR LOCATION: Nucleus {ECO:0000256|SAAS:SAAS00539527}.
B7ZW38	HNRNPCL3	Evidence at transcript level	GO:0003723; GO:0000166; GO:0005634		SUBCELLULAR LOCATION: Nucleus {ECO:0000250|UniProtKB:P07910}.
B8XCX7	NA	Evidence at transcript level	GO:0032777; GO:0006357; GO:0006351		SUBCELLULAR LOCATION: Nucleus {ECO:0000256|RuleBase:RU361124}.
B8ZZJ5	MEF2B	Evidence at protein level	GO:0003677; GO:0005634; GO:0006355; GO:0006351		SUBCELLULAR LOCATION: Nucleus {ECO:0000256|RuleBase:RU000476, ECO:0000256|SAAS:SAAS00579852}.
B9EG68	PEG3	Evidence at transcript level	GO:0046872; GO:0003676; GO:0005634; GO:0003700; GO:0006351		SUBCELLULAR LOCATION: Nucleus {ECO:0000256|SAAS:SAAS00535819}.
B9EGR5	NA	Evidence at transcript level	GO:0003677; GO:0005634; GO:0003700; GO:0006351		SUBCELLULAR LOCATION: Nucleus {ECO:0000256|SAAS:SAAS00353240}.
B9EK48	ZFHX2	Evidence at transcript level	GO:0005634; GO:0006355; GO:0043565; GO:0008270		SUBCELLULAR LOCATION: Nucleus {ECO:0000256|RuleBase:RU000682}.
B9VVT8	HNF4A	Evidence at transcript level	GO:0005634; GO:0043565; GO:0003700; GO:0006351; GO:0008270		SUBCELLULAR LOCATION: Nucleus {ECO:0000256|SAAS:SAAS00586772}.
C0H5Y2	NR1I3	Evidence at transcript level	GO:0005634; GO:0043565; GO:0003707; GO:0003700; GO:0006351; GO:0008270		SUBCELLULAR LOCATION: Nucleus {ECO:0000256|SAAS:SAAS00595767}.
C0JKD5	AR	Evidence at transcript level	GO:0004882; GO:0005634; GO:0043565; GO:0005496; GO:0006351; GO:0008270		SUBCELLULAR LOCATION: Nucleus {ECO:0000256|SAAS:SAAS00586772}.
C0JKD6	AR	Evidence at transcript level	GO:0004882; GO:0005634; GO:0043565; GO:0005496; GO:0006351; GO:0008270		SUBCELLULAR LOCATION: Nucleus {ECO:0000256|SAAS:SAAS00586772}.
C0JKD7	AR	Evidence at transcript level	GO:0004882; GO:0005634; GO:0043565; GO:0005496; GO:0006351; GO:0008270		SUBCELLULAR LOCATION: Nucleus {ECO:0000256|SAAS:SAAS00586772}.
C0KTF2	PAX5	Evidence at transcript level	GO:0003677; GO:0007275; GO:0005634; GO:0006355; GO:0006351		SUBCELLULAR LOCATION: Nucleus {ECO:0000256|RuleBase:RU000491, ECO:0000256|SAAS:SAAS00117811}.
C0KWD2	NR4A2	Evidence at transcript level	GO:0003677; GO:0004879; GO:0005634; GO:0003707; GO:0006351		SUBCELLULAR LOCATION: Nucleus {ECO:0000256|SAAS:SAAS00595767}.
C0L927	ESR1	Evidence at transcript level	GO:0005634; GO:0043565; GO:0003700; GO:0006351; GO:0008270		SUBCELLULAR LOCATION: Nucleus {ECO:0000256|SAAS:SAAS00586772}.
C0LJA7	ESR1	Evidence at transcript level	GO:0005634; GO:0043565; GO:0043401; GO:0003700; GO:0006351; GO:0008270		SUBCELLULAR LOCATION: Nucleus {ECO:0000256|SAAS:SAAS00595767}.
C0LJA8	ESR1	Evidence at transcript level	GO:0005634; GO:0043565; GO:0043401; GO:0003700; GO:0006351; GO:0008270		SUBCELLULAR LOCATION: Nucleus {ECO:0000256|SAAS:SAAS00595767}.
C0LJA9	ESR1	Evidence at transcript level	GO:0005634; GO:0043565; GO:0003700; GO:0006351; GO:0008270		SUBCELLULAR LOCATION: Nucleus {ECO:0000256|SAAS:SAAS00586772}.
C0LLI5	ESR1	Evidence at transcript level	GO:0005634; GO:0043565; GO:0003700; GO:0006351; GO:0008270		SUBCELLULAR LOCATION: Nucleus {ECO:0000256|SAAS:SAAS00586772}.
C0LLI6	ESR1	Evidence at transcript level	GO:0005634; GO:0043565; GO:0043401; GO:0003700; GO:0006351; GO:0008270		SUBCELLULAR LOCATION: Nucleus {ECO:0000256|SAAS:SAAS00586772}.
C0LLI7	ESR1	Evidence at transcript level	GO:0005634; GO:0043565; GO:0043401; GO:0003700; GO:0006351; GO:0008270		SUBCELLULAR LOCATION: Nucleus {ECO:0000256|SAAS:SAAS00595767}.
C0LLI8	ESR1	Evidence at transcript level	GO:0005634; GO:0043565; GO:0003707; GO:0003700; GO:0006351; GO:0008270		SUBCELLULAR LOCATION: Nucleus {ECO:0000256|SAAS:SAAS00595767}.
C0LLI9	ESR1	Evidence at transcript level	GO:0005634; GO:0043565; GO:0043401; GO:0003700; GO:0006351; GO:0008270		SUBCELLULAR LOCATION: Nucleus {ECO:0000256|SAAS:SAAS00586772}.
C0SQ93	ERRgamma	Evidence at transcript level	GO:0005634; GO:0003708; GO:0043565; GO:0005496; GO:0003707; GO:0006351; GO:0008270		SUBCELLULAR LOCATION: Nucleus {ECO:0000256|PIRNR:PIRNR002527, ECO:0000256|SAAS:SAAS00595767}.
C1IDX9	ATG12	Evidence at transcript level	GO:0000045; GO:0005737		SUBCELLULAR LOCATION: Cytoplasm {ECO:0000256|RuleBase:RU361201}.
C1IK54	DDX5-ETV4	Evidence at transcript level	GO:0005634; GO:0043565; GO:0003700		SUBCELLULAR LOCATION: Nucleus {ECO:0000256|SAAS:SAAS00594387}.
C3U395	DUX4	Predicted	GO:0003677; GO:0005634		SUBCELLULAR LOCATION: Nucleus {ECO:0000256|RuleBase:RU000682}.
C3U396	DUX4	Predicted	GO:0003677; GO:0005634		SUBCELLULAR LOCATION: Nucleus {ECO:0000256|RuleBase:RU000682}.
C3U397	DUX4	Predicted	GO:0003677; GO:0005634		SUBCELLULAR LOCATION: Nucleus {ECO:0000256|RuleBase:RU000682}.
C3U398	DUX4	Predicted	GO:0003677; GO:0005634		SUBCELLULAR LOCATION: Nucleus {ECO:0000256|RuleBase:RU000682}.
C3U399	DUX4	Predicted	GO:0003677; GO:0005634	SIGNAL 1 28 {ECO:0000256|SAM:SignalP}.	SUBCELLULAR LOCATION: Nucleus {ECO:0000256|RuleBase:RU000682}.
C3U3A0	DUX4	Evidence at transcript level	GO:0003677; GO:0005634		SUBCELLULAR LOCATION: Nucleus {ECO:0000256|RuleBase:RU000682}.
C4AMC7	WASH3P	Evidence at protein level	GO:0034314; GO:0071203; GO:0043014; GO:0005776; GO:0005814; GO:0031410; GO:0005829; GO:0005769; GO:0031901; GO:0045022; GO:0016197; GO:0007032; GO:0030175; GO:0030027; GO:0006622; GO:0055037; GO:0055038; GO:0042147		SUBCELLULAR LOCATION: Early endosome {ECO:0000269|PubMed:20175130, ECO:0000269|PubMed:20498093}. Early endosome membrane {ECO:0000250|UniProtKB:A8K0Z3}. Recycling endosome membrane {ECO:0000250|UniProtKB:Q8VDD8}. Cell projection, lamellipodium {ECO:0000269|PubMed:18159949}. Cell projection, filopodium {ECO:0000269|PubMed:18159949}. Cytoplasmic vesicle, autophagosome {ECO:0000250|UniProtKB:Q8VDD8}…
C6EMX8	MCM7	Evidence at transcript level	GO:0005524; GO:0003677; GO:0003678; GO:0006270; GO:0042555; GO:0005634		SUBCELLULAR LOCATION: Nucleus {ECO:0000256|SAAS:SAAS00534438}.
C7FFR5	ESR1	Evidence at transcript level	GO:0005634; GO:0043565; GO:0003700; GO:0006351; GO:0008270		SUBCELLULAR LOCATION: Nucleus {ECO:0000256|SAAS:SAAS00586772}.
C7FNH7	NA	Predicted	GO:0003677; GO:0007275; GO:0005634; GO:0006355; GO:0006351		SUBCELLULAR LOCATION: Nucleus {ECO:0000256|RuleBase:RU000491, ECO:0000256|SAAS:SAAS00117811}.
C8CJK8	ESR1	Evidence at transcript level	GO:0005634; GO:0043565; GO:0003700; GO:0006351; GO:0008270		SUBCELLULAR LOCATION: Nucleus {ECO:0000256|SAAS:SAAS00586772}.
C8CJL1	ESR1	Evidence at transcript level	GO:0005634; GO:0043565; GO:0003700; GO:0006351; GO:0008270		SUBCELLULAR LOCATION: Nucleus {ECO:0000256|SAAS:SAAS00586772}.
C8CJL2	ESR1	Evidence at transcript level	GO:0005634; GO:0043565; GO:0003700; GO:0006351; GO:0008270		SUBCELLULAR LOCATION: Nucleus {ECO:0000256|SAAS:SAAS00586772}.
C8CJL3	ESR1	Evidence at transcript level	GO:0005634; GO:0043565; GO:0003700; GO:0006351; GO:0008270		SUBCELLULAR LOCATION: Nucleus {ECO:0000256|SAAS:SAAS00586772}.
C8CJL6	ESR1	Evidence at transcript level	GO:0005634; GO:0043565; GO:0003707; GO:0003700; GO:0006351; GO:0008270		SUBCELLULAR LOCATION: Nucleus {ECO:0000256|SAAS:SAAS00595767}.
C9D7C9	TP63	Evidence at transcript level	GO:0006915; GO:0007049; GO:0005737; GO:0032502; GO:0046872; GO:0005634; GO:0051262; GO:0003700; GO:0044212; GO:0006351		SUBCELLULAR LOCATION: Cytoplasm {ECO:0000256|RuleBase:RU003304}. Nucleus {ECO:0000256|RuleBase:RU003304}.
C9D7D0	TP63	Evidence at transcript level	GO:0006915; GO:0007049; GO:0005737; GO:0032502; GO:0046872; GO:0005634; GO:0051262; GO:0003700; GO:0044212; GO:0006351		SUBCELLULAR LOCATION: Cytoplasm {ECO:0000256|RuleBase:RU003304}. Nucleus {ECO:0000256|RuleBase:RU003304}.
C9E0E9	ESR1	Evidence at transcript level	GO:0005634; GO:0043565; GO:0003700; GO:0006351; GO:0008270		SUBCELLULAR LOCATION: Nucleus {ECO:0000256|SAAS:SAAS00586772}.
C9E0F0	ESR1	Evidence at transcript level	GO:0005634; GO:0043565; GO:0043401; GO:0003700; GO:0006351; GO:0008270		SUBCELLULAR LOCATION: Nucleus {ECO:0000256|SAAS:SAAS00595767}.
C9E0F1	ESR1	Evidence at transcript level	GO:0005634; GO:0006355; GO:0043401; GO:0006351		SUBCELLULAR LOCATION: Nucleus {ECO:0000256|SAAS:SAAS00595767}.
C9E0F3	ESR1	Evidence at transcript level	GO:0005634; GO:0043565; GO:0003700; GO:0006351; GO:0008270		SUBCELLULAR LOCATION: Nucleus {ECO:0000256|SAAS:SAAS00586772}.
C9IZ76	PTPA	Evidence at protein level	GO:0005737; GO:0003755; GO:0019211		SUBCELLULAR LOCATION: Cytoplasm {ECO:0000256|RuleBase:RU361210}.
C9J0D1	H2AFV	Evidence at protein level	GO:0003677; GO:0000786; GO:0005634		SUBCELLULAR LOCATION: Chromosome {ECO:0000256|SAAS:SAAS00579821}.; SUBCELLULAR LOCATION: Nucleus {ECO:0000256|RuleBase:RU000527, ECO:0000256|SAAS:SAAS00579805}.
C9J0F0	FOXP1	Evidence at protein level	GO:0005654; GO:0043565; GO:0003700; GO:0006351		SUBCELLULAR LOCATION: Nucleus {ECO:0000256|SAAS:SAAS00582275}.
C9J0Q5	NCOR2	Evidence at protein level	GO:0003677; GO:0005654		SUBCELLULAR LOCATION: Nucleus {ECO:0000256|SAAS:SAAS00548613}.
C9J1C1	ATG4B	Evidence at protein level	GO:0006914; GO:0004197; GO:0005737; GO:0015031		SUBCELLULAR LOCATION: Cytoplasm {ECO:0000256|SAAS:SAAS00570686}.
C9J1X4	EPC2	Evidence at protein level	GO:0032777; GO:0006357; GO:0006351		SUBCELLULAR LOCATION: Nucleus {ECO:0000256|RuleBase:RU361124}.
C9J2C8	NR1H3	Inferred from homology	GO:0005634; GO:0043565; GO:0003700; GO:0006351; GO:0008270		SUBCELLULAR LOCATION: Nucleus {ECO:0000256|SAAS:SAAS00586772}.
C9J2P7	USP17L15	Inferred from homology	GO:0005783; GO:0005634; GO:0016579; GO:0036459; GO:0006511		SUBCELLULAR LOCATION: Nucleus {ECO:0000250}. Endoplasmic reticulum {ECO:0000250}.
C9J330	NCOR2	Evidence at protein level	GO:0003677; GO:0005634		SUBCELLULAR LOCATION: Nucleus {ECO:0000256|SAAS:SAAS00548613}.
C9J381	IMPDH1	Evidence at protein level	GO:0006177; GO:0003938; GO:0005737; GO:0046872; GO:0000166; GO:0005634		SUBCELLULAR LOCATION: Cytoplasm {ECO:0000256|HAMAP-Rule:MF_03156}. Nucleus {ECO:0000256|HAMAP-Rule:MF_03156}.
C9J386	H2AFV	Inferred from homology	GO:0003677; GO:0000786; GO:0005634		SUBCELLULAR LOCATION: Nucleus {ECO:0000256|RuleBase:RU000527}.
C9J3C0	NA	Evidence at protein level	GO:0006914; GO:0004197; GO:0005737; GO:0015031		SUBCELLULAR LOCATION: Cytoplasm {ECO:0000256|SAAS:SAAS00570686}.
C9J3V5	TEX22	Evidence at transcript level	GO:0001669		SUBCELLULAR LOCATION: Cytoplasm {ECO:0000250}. Cytoplasmic vesicle, secretory vesicle, acrosome {ECO:0000250}.
C9J461	TFDP2	Evidence at protein level	GO:0003677; GO:0000278; GO:0005634; GO:0003712; GO:0003700; GO:0005667; GO:0006351		SUBCELLULAR LOCATION: Nucleus {ECO:0000256|RuleBase:RU003796}.
C9J4J4	MEF2B	Evidence at protein level	GO:0003677; GO:0005634; GO:0006355; GO:0006351		SUBCELLULAR LOCATION: Nucleus {ECO:0000256|RuleBase:RU000476, ECO:0000256|SAAS:SAAS00579852}.
C9J4R0	NR1H3	Evidence at protein level	GO:0005634; GO:0043565; GO:0043401; GO:0003700; GO:0006351; GO:0008270		SUBCELLULAR LOCATION: Nucleus {ECO:0000256|SAAS:SAAS00586772}.
C9J6K3	CBX8	Evidence at protein level	GO:0005634		SUBCELLULAR LOCATION: Nucleus {ECO:0000256|SAAS:SAAS00539054}.
C9J798	RASA4B	Inferred from homology	GO:0005096; GO:0005737; GO:0005829; GO:0035556; GO:0031235; GO:0046872; GO:0046580		SUBCELLULAR LOCATION: Cytoplasm, cytosol {ECO:0000250|UniProtKB:O43374}. Cell membrane {ECO:0000250|UniProtKB:O43374}; Peripheral membrane protein {ECO:0000250|UniProtKB:O43374}.
C9J7T7	NCOR2	Evidence at protein level	GO:0003677; GO:0005634		SUBCELLULAR LOCATION: Nucleus {ECO:0000256|SAAS:SAAS00548613}.
C9J872	TFDP2	Evidence at protein level	GO:0003677; GO:0000278; GO:0005634; GO:0003712; GO:0003700; GO:0005667; GO:0006351		SUBCELLULAR LOCATION: Nucleus {ECO:0000256|RuleBase:RU003796}.
C9J8W4	NR4A2	Evidence at protein level	GO:0004879; GO:0005634; GO:0043565; GO:0003707; GO:0006351; GO:0008270		SUBCELLULAR LOCATION: Nucleus {ECO:0000256|SAAS:SAAS00595767}.
C9J977	TFDP2	Evidence at protein level	GO:0003677; GO:0000278; GO:0005634; GO:0003712; GO:0003700; GO:0005667; GO:0006351		SUBCELLULAR LOCATION: Nucleus {ECO:0000256|RuleBase:RU003796}.
C9J9K3	RPSA	Evidence at protein level	GO:0015935; GO:0003735; GO:0006412		SUBCELLULAR LOCATION: Cytoplasm {ECO:0000256|SAAS:SAAS00536002}.
C9J9N2	EPAS1	Predicted	GO:0005737; GO:0005634; GO:0003700; GO:0005667; GO:0006351		SUBCELLULAR LOCATION: Nucleus {ECO:0000256|SAAS:SAAS00600858}.
C9JBS2	NR1H3	Evidence at protein level	GO:0005634; GO:0043565; GO:0043401; GO:0003700; GO:0006351; GO:0008270		SUBCELLULAR LOCATION: Nucleus {ECO:0000256|SAAS:SAAS00586772}.
C9JC51	ATG4C	Evidence at protein level	GO:0006914; GO:0004197; GO:0005737; GO:0015031		SUBCELLULAR LOCATION: Cytoplasm {ECO:0000256|SAAS:SAAS00570686}.
C9JCC6	DRAP1	Evidence at protein level	GO:0005634		SUBCELLULAR LOCATION: Nucleus {ECO:0000256|SAAS:SAAS00572571}.
C9JCS0	NR1H3	Evidence at protein level	GO:0005634; GO:0043565; GO:0043401; GO:0003700; GO:0006351; GO:0008270		SUBCELLULAR LOCATION: Nucleus {ECO:0000256|SAAS:SAAS00586772}.
C9JDI9	NR6A1	Inferred from homology	GO:0005634; GO:0043565; GO:0043401; GO:0003700; GO:0006351; GO:0008270		SUBCELLULAR LOCATION: Nucleus {ECO:0000256|SAAS:SAAS00586772}.
C9JE40	PATL2	Evidence at protein level	GO:0003723; GO:0005737; GO:0000932; GO:0033962; GO:0000290; GO:0010607; GO:0017148; GO:0005634		SUBCELLULAR LOCATION: Cytoplasm {ECO:0000269|PubMed:20584987}. Nucleus {ECO:0000250}.
C9JE98	NCOR2	Evidence at protein level	GO:0003677; GO:0005654		SUBCELLULAR LOCATION: Nucleus {ECO:0000256|SAAS:SAAS00548613}.
C9JFD3	NA	Evidence at protein level	GO:0001012; GO:0000785; GO:0003682; GO:0044849; GO:0007595; GO:0005654; GO:0032355; GO:0010243		SUBCELLULAR LOCATION: Nucleus {ECO:0000256|SAAS:SAAS00548613}.
C9JFU2	CHD6	Evidence at protein level	GO:0005524; GO:0005634		SUBCELLULAR LOCATION: Nucleus {ECO:0000256|SAAS:SAAS00539527}.
C9JH95	DOT1L	Evidence at protein level	GO:0031151; GO:0005634; GO:0051726		SUBCELLULAR LOCATION: Nucleus {ECO:0000256|RuleBase:RU271113}.
C9JIK8	ATG4B	Evidence at protein level	GO:0006914; GO:0004197; GO:0005737; GO:0015031		SUBCELLULAR LOCATION: Cytoplasm {ECO:0000256|SAAS:SAAS00570686}.
C9JJ16	NR1H3	Evidence at protein level	GO:0005634; GO:0043565; GO:0043401; GO:0003700; GO:0006351; GO:0008270		SUBCELLULAR LOCATION: Nucleus {ECO:0000256|SAAS:SAAS00586772}.
C9JJH3	USP17L10	Inferred from homology	GO:0005783; GO:0005634; GO:0016579; GO:0036459; GO:0006511		SUBCELLULAR LOCATION: Nucleus {ECO:0000250}. Endoplasmic reticulum {ECO:0000250}.
C9JK03	CLOCK	Evidence at protein level	GO:0005737; GO:0005634; GO:0003700; GO:0005667; GO:0006351		SUBCELLULAR LOCATION: Nucleus {ECO:0000256|SAAS:SAAS00600858}.
C9JKS0	NR2C2	Evidence at protein level	GO:0005634; GO:0043565; GO:0003700; GO:0006351; GO:0008270		SUBCELLULAR LOCATION: Nucleus {ECO:0000256|SAAS:SAAS00586772}.
C9JLJ4	USP17L13	Inferred from homology	GO:0005783; GO:0005634; GO:0016579; GO:0036459; GO:0006511		SUBCELLULAR LOCATION: Nucleus {ECO:0000250}. Endoplasmic reticulum {ECO:0000250}.
C9JLW8	MCRIP1	Evidence at protein level	GO:0005634; GO:0010717		SUBCELLULAR LOCATION: Nucleus {ECO:0000269|PubMed:25728771}.
C9JM54	CBX8	Evidence at protein level	GO:0005634		SUBCELLULAR LOCATION: Nucleus {ECO:0000256|SAAS:SAAS00539054}.
C9JMH9	CDY2A	Predicted	GO:0003824; GO:0008152; GO:0005634		SUBCELLULAR LOCATION: Nucleus {ECO:0000256|SAAS:SAAS00539527}.
C9JN71	ZNF878	Inferred from homology	GO:0046872; GO:0003676; GO:0005634; GO:0006355; GO:0006351		SUBCELLULAR LOCATION: Nucleus {ECO:0000305}.
C9JNQ4	THRB	Evidence at protein level	GO:0005634; GO:0043565; GO:0004887; GO:0006351; GO:0008270		SUBCELLULAR LOCATION: Nucleus {ECO:0000256|SAAS:SAAS00586772}.
C9JPN9	USP17L12	Inferred from homology	GO:0005783; GO:0005634; GO:0016579; GO:0036459; GO:0006511		SUBCELLULAR LOCATION: Nucleus {ECO:0000250}. Endoplasmic reticulum {ECO:0000250}.
C9JQ72	NA	Evidence at protein level	GO:0006914; GO:0004197; GO:0005737; GO:0015031		SUBCELLULAR LOCATION: Cytoplasm {ECO:0000256|SAAS:SAAS00570686}.
C9JQE8	NCOR2	Evidence at protein level	GO:0003677; GO:0005654		SUBCELLULAR LOCATION: Nucleus {ECO:0000256|SAAS:SAAS00548613}.
C9JR56	SATB2	Evidence at protein level	GO:0003677; GO:0005737; GO:0005654; GO:0006355; GO:0006351		SUBCELLULAR LOCATION: Nucleus {ECO:0000256|RuleBase:RU361129}.
C9JR72	KBTBD13	Evidence at protein level	GO:0031463; GO:0005737; GO:0016567		SUBCELLULAR LOCATION: Cytoplasm {ECO:0000269|PubMed:21109227, ECO:0000269|PubMed:22542517}.
C9JRZ8	AKR1B15	Evidence at protein level	GO:0005829; GO:0004303; GO:0006703; GO:0005759; GO:0005739; GO:0016616		SUBCELLULAR LOCATION: Isoform 1: Mitochondrion {ECO:0000269|PubMed:25577493}.; SUBCELLULAR LOCATION: Isoform 2: Cytoplasm, cytosol {ECO:0000269|PubMed:25577493}.
C9JSJ3	BHMG1	Inferred from homology	GO:0003677; GO:0005634; GO:0006355; GO:0006351		SUBCELLULAR LOCATION: Nucleus {ECO:0000255|PROSITE-ProRule:PRU00267}.
C9JU32	ESRRG	Evidence at protein level	GO:0005634; GO:0043565; GO:0005496; GO:0003707; GO:0003700; GO:0006351; GO:0008270		SUBCELLULAR LOCATION: Nucleus {ECO:0000256|SAAS:SAAS00595767}.
C9JVD5	NA	Evidence at protein level	GO:0006914; GO:0004197; GO:0005737; GO:0015031		SUBCELLULAR LOCATION: Cytoplasm {ECO:0000256|SAAS:SAAS00570686}.
C9JVI0	USP17L11	Inferred from homology	GO:0005783; GO:0005634; GO:0016579; GO:0036459; GO:0006511		SUBCELLULAR LOCATION: Nucleus {ECO:0000250}. Endoplasmic reticulum {ECO:0000250}.
C9JWJ8	NFIX	Evidence at protein level	GO:0003677; GO:0006260; GO:0005634; GO:0003700; GO:0006351		SUBCELLULAR LOCATION: Nucleus {ECO:0000256|RuleBase:RU000690, ECO:0000256|SAAS:SAAS00573677}.
C9JWS9	CBX1	Evidence at protein level	GO:0005634		SUBCELLULAR LOCATION: Nucleus {ECO:0000256|SAAS:SAAS00539054}.
C9JYE9	E2F5	Evidence at protein level	GO:0003677; GO:0005730; GO:0005634; GO:0051726; GO:0003700; GO:0005667; GO:0006351		SUBCELLULAR LOCATION: Nucleus {ECO:0000256|RuleBase:RU003796}.
C9K088	MNX1	Evidence at protein level	GO:0003677; GO:0005634		SUBCELLULAR LOCATION: Nucleus {ECO:0000256|RuleBase:RU000682, ECO:0000256|SAAS:SAAS00544279}.
C9K0F9	NA	Evidence at protein level	GO:0005794; GO:0070776; GO:0048513; GO:0043966; GO:0004402; GO:0005654; GO:0006355; GO:0003713		SUBCELLULAR LOCATION: Nucleus {ECO:0000256|RuleBase:RU361211}.
D0VY79	HIF1A	Evidence at transcript level	GO:0005634; GO:0003700; GO:0006351		SUBCELLULAR LOCATION: Nucleus {ECO:0000256|SAAS:SAAS00600858}.
D1H0M5	SRY	Inferred from homology	GO:0003677; GO:0030154; GO:0030238; GO:0005634; GO:0007548; GO:0003700; GO:0006351		SUBCELLULAR LOCATION: Nucleus {ECO:0000256|SAAS:SAAS00548902}.
D1KF47	PAX6	Evidence at transcript level	GO:0007275; GO:0005634; GO:0006355; GO:0043565; GO:0006351		SUBCELLULAR LOCATION: Nucleus {ECO:0000256|RuleBase:RU000491, ECO:0000256|SAAS:SAAS00117811}.
D2CFI4	NA	Evidence at transcript level	GO:0005634; GO:0006355; GO:0043565		SUBCELLULAR LOCATION: Nucleus {ECO:0000256|RuleBase:RU000682}.
D2CFI5	TPRX1	Evidence at transcript level	GO:0005634; GO:0006355; GO:0043565		SUBCELLULAR LOCATION: Nucleus {ECO:0000256|RuleBase:RU000682}.
D2CFK9	GTPBP4	Inferred from homology	GO:0005525; GO:0005794; GO:0005737; GO:0031965; GO:0005730; GO:0005634; GO:0042254		SUBCELLULAR LOCATION: Nucleus, nucleolus {ECO:0000256|PIRNR:PIRNR038919}.
D2DXM9	NA	Evidence at transcript level	GO:0003677; GO:0006260; GO:0005634; GO:0003700; GO:0006351		SUBCELLULAR LOCATION: Nucleus {ECO:0000256|RuleBase:RU000690, ECO:0000256|SAAS:SAAS00573677}.
D2IYK3	POU5F1	Evidence at transcript level	GO:0019955; GO:0001158; GO:0010629; GO:0000790; GO:0010628; GO:0003700; GO:0006351		SUBCELLULAR LOCATION: Nucleus {ECO:0000256|RuleBase:RU361194, ECO:0000256|SAAS:SAAS00553137}.
D2KF13	AR	Evidence at transcript level	GO:0004882; GO:0005634; GO:0043565; GO:0005496; GO:0006351; GO:0008270		SUBCELLULAR LOCATION: Nucleus {ECO:0000256|SAAS:SAAS00595767}.
D2KUA6	PPARG	Evidence at transcript level	GO:0005794; GO:0004879; GO:0043231; GO:0005634; GO:0043565; GO:0003707; GO:0006351; GO:0008270		SUBCELLULAR LOCATION: Nucleus {ECO:0000256|SAAS:SAAS00595767}.
D2Y6K2	AR	Inferred from homology	GO:0004882; GO:0005634; GO:0043565; GO:0005496; GO:0006351; GO:0008270		SUBCELLULAR LOCATION: Nucleus {ECO:0000256|SAAS:SAAS00595767}.
D3DPV3	ZNF643	Predicted	GO:0046872; GO:0003676; GO:0005634; GO:0003700; GO:0006351		SUBCELLULAR LOCATION: Nucleus {ECO:0000256|SAAS:SAAS00574784}.
D3DQZ8	PAX6	Predicted	GO:0005737; GO:0007275; GO:0005654; GO:0006355; GO:0043565; GO:0006351		SUBCELLULAR LOCATION: Nucleus {ECO:0000256|RuleBase:RU000491, ECO:0000256|SAAS:SAAS00117811}.
D3DSU2	HMBOX1	Predicted	GO:0003677; GO:0005634; GO:0045893		SUBCELLULAR LOCATION: Nucleus {ECO:0000256|RuleBase:RU000682}.
D3DTV9	PRAC2	Uncertain	GO:0005634		SUBCELLULAR LOCATION: Nucleus {ECO:0000269|PubMed:12746837}.
D3DUC1	ZNF263	Predicted	GO:0046872; GO:0003676; GO:0005634; GO:0003700; GO:0006351		SUBCELLULAR LOCATION: Nucleus {ECO:0000256|SAAS:SAAS00574784}.
D3DUQ6	TEAD4	Evidence at transcript level	GO:0003677; GO:0035329; GO:0005634; GO:0003700; GO:0006351		SUBCELLULAR LOCATION: Nucleus {ECO:0000256|PIRNR:PIRNR002603}.
D3DUU5	hCG_1730823	Predicted	GO:0005634; GO:0006355; GO:0043565		SUBCELLULAR LOCATION: Nucleus {ECO:0000256|RuleBase:RU000682}.
D3DV25	RORC	Inferred from homology	GO:0004879; GO:0043231; GO:0005730; GO:0043565; GO:0003707; GO:0006351; GO:0008270		SUBCELLULAR LOCATION: Nucleus {ECO:0000256|SAAS:SAAS00595767}.
D3DW91	hCG_23704	Inferred from homology	GO:0003677; GO:0000278; GO:0005634; GO:0003713; GO:0003700; GO:0005667; GO:0006351		SUBCELLULAR LOCATION: Nucleus {ECO:0000256|RuleBase:RU003796}.
D3DX44	ETV4	Inferred from homology	GO:0005634; GO:0043565; GO:0003700		SUBCELLULAR LOCATION: Nucleus {ECO:0000256|SAAS:SAAS00594387}.
D3YPP9	AR	Inferred from homology	GO:0004882; GO:0005634; GO:0043565; GO:0005496; GO:0006351; GO:0008270		SUBCELLULAR LOCATION: Nucleus {ECO:0000256|SAAS:SAAS00595767}.
D3YPQ0	AR	Inferred from homology	GO:0004882; GO:0005634; GO:0043565; GO:0005496; GO:0006351; GO:0008270		SUBCELLULAR LOCATION: Nucleus {ECO:0000256|SAAS:SAAS00595767}.
D3YPQ1	AR	Inferred from homology	GO:0004882; GO:0005634; GO:0043565; GO:0005496; GO:0006351; GO:0008270		SUBCELLULAR LOCATION: Nucleus {ECO:0000256|SAAS:SAAS00595767}.
D3YPQ2	AR	Inferred from homology	GO:0004882; GO:0005634; GO:0043565; GO:0005496; GO:0006351; GO:0008270		SUBCELLULAR LOCATION: Nucleus {ECO:0000256|SAAS:SAAS00595767}.
D3YPQ3	AR	Inferred from homology	GO:0004882; GO:0005634; GO:0043565; GO:0005496; GO:0006351; GO:0008270		SUBCELLULAR LOCATION: Nucleus {ECO:0000256|SAAS:SAAS00595767}.
D5K9Q3	POU5F1	Evidence at transcript level	GO:0019955; GO:0001158; GO:0010629; GO:0000790; GO:0010628; GO:0003700; GO:0006351		SUBCELLULAR LOCATION: Nucleus {ECO:0000256|RuleBase:RU361194, ECO:0000256|SAAS:SAAS00553137}.
D5K9Q6	POU5F1	Evidence at transcript level	GO:0005634; GO:0043565; GO:0003700; GO:0006351		SUBCELLULAR LOCATION: Nucleus {ECO:0000256|RuleBase:RU361194, ECO:0000256|SAAS:SAAS00553137}.
D5K9Q7	POU5F1	Evidence at transcript level	GO:0005634; GO:0043565; GO:0003700; GO:0006351		SUBCELLULAR LOCATION: Nucleus {ECO:0000256|RuleBase:RU361194, ECO:0000256|SAAS:SAAS00553137}.
D5K9Q9	POU5F1	Evidence at transcript level	GO:0005634; GO:0043565; GO:0003700; GO:0006351		SUBCELLULAR LOCATION: Nucleus {ECO:0000256|RuleBase:RU361194, ECO:0000256|SAAS:SAAS00553137}.
D5K9R1	POU5F1	Evidence at transcript level	GO:0005634; GO:0043565; GO:0003700; GO:0006351		SUBCELLULAR LOCATION: Nucleus {ECO:0000256|RuleBase:RU361194, ECO:0000256|SAAS:SAAS00553137}.
D5K9R2	POU5F1	Evidence at transcript level	GO:0005634; GO:0043565; GO:0003700; GO:0006351		SUBCELLULAR LOCATION: Nucleus {ECO:0000256|RuleBase:RU361194, ECO:0000256|SAAS:SAAS00553137}.
D5K9R3	POU5F1	Evidence at transcript level	GO:0019955; GO:0001158; GO:0010629; GO:0000790; GO:0010628; GO:0003700; GO:0006351		SUBCELLULAR LOCATION: Nucleus {ECO:0000256|RuleBase:RU361194, ECO:0000256|SAAS:SAAS00553137}.
D5K9R4	POU5F1	Evidence at transcript level	GO:0005634; GO:0043565; GO:0003700; GO:0006351		SUBCELLULAR LOCATION: Nucleus {ECO:0000256|RuleBase:RU361194, ECO:0000256|SAAS:SAAS00553137}.
D5K9R5	POU5F1	Evidence at transcript level	GO:0005634; GO:0043565; GO:0003700; GO:0006351		SUBCELLULAR LOCATION: Nucleus {ECO:0000256|RuleBase:RU361194, ECO:0000256|SAAS:SAAS00553137}.
D5K9R7	POU5F1	Evidence at transcript level	GO:0005634; GO:0043565; GO:0003700; GO:0006351		SUBCELLULAR LOCATION: Nucleus {ECO:0000256|RuleBase:RU361194, ECO:0000256|SAAS:SAAS00553137}.
D5K9R8	POU5F1	Evidence at transcript level	GO:0005634; GO:0043565; GO:0003700		SUBCELLULAR LOCATION: Nucleus {ECO:0000256|RuleBase:RU000682, ECO:0000256|SAAS:SAAS00553137}.
D5K9R9	POU5F1	Evidence at transcript level	GO:0005634; GO:0043565; GO:0003700; GO:0006351		SUBCELLULAR LOCATION: Nucleus {ECO:0000256|RuleBase:RU361194, ECO:0000256|SAAS:SAAS00553137}.
D5K9S1	POU5F1	Evidence at transcript level	GO:0005634; GO:0043565; GO:0003700; GO:0006351		SUBCELLULAR LOCATION: Nucleus {ECO:0000256|RuleBase:RU361194, ECO:0000256|SAAS:SAAS00553137}.
D5K9S3	POU5F1P4	Evidence at transcript level	GO:0005634; GO:0043565; GO:0003700; GO:0006351		SUBCELLULAR LOCATION: Nucleus {ECO:0000256|RuleBase:RU361194, ECO:0000256|SAAS:SAAS00553137}.
D5K9S5	POU5F1P4	Evidence at transcript level	GO:0005634; GO:0043565; GO:0003700		SUBCELLULAR LOCATION: Nucleus {ECO:0000256|RuleBase:RU000682, ECO:0000256|SAAS:SAAS00553137}.
D5K9S8	POU5F1P4	Evidence at transcript level	GO:0005634; GO:0043565; GO:0003700; GO:0006351		SUBCELLULAR LOCATION: Nucleus {ECO:0000256|RuleBase:RU361194, ECO:0000256|SAAS:SAAS00553137}.
D5K9T7	POU5F1P4	Evidence at transcript level	GO:0005634; GO:0043565; GO:0003700; GO:0006351		SUBCELLULAR LOCATION: Nucleus {ECO:0000256|RuleBase:RU361194, ECO:0000256|SAAS:SAAS00553137}.
D5K9T8	POU5F1P4	Evidence at transcript level	GO:0005634; GO:0043565; GO:0003700		SUBCELLULAR LOCATION: Nucleus {ECO:0000256|RuleBase:RU000682, ECO:0000256|SAAS:SAAS00553137}.
D5K9T9	POU5F1P4	Evidence at transcript level	GO:0003677; GO:0005634; GO:0003700; GO:0006351		SUBCELLULAR LOCATION: Nucleus {ECO:0000256|RuleBase:RU361194, ECO:0000256|SAAS:SAAS00553137}.
D5K9U0	POU5F1P4	Evidence at transcript level	GO:0005634; GO:0043565; GO:0003700; GO:0006351		SUBCELLULAR LOCATION: Nucleus {ECO:0000256|RuleBase:RU361194, ECO:0000256|SAAS:SAAS00553137}.
D5K9U2	POU5F1P4	Evidence at transcript level	GO:0005634; GO:0043565; GO:0003700		SUBCELLULAR LOCATION: Nucleus {ECO:0000256|RuleBase:RU000682, ECO:0000256|SAAS:SAAS00553137}.
D5K9U4	POU5F1P4	Evidence at transcript level	GO:0005634; GO:0043565; GO:0003700		SUBCELLULAR LOCATION: Nucleus {ECO:0000256|RuleBase:RU000682, ECO:0000256|SAAS:SAAS00553137}.
D5K9U9	POU5F1P4	Evidence at transcript level	GO:0005634; GO:0043565; GO:0003700; GO:0006351		SUBCELLULAR LOCATION: Nucleus {ECO:0000256|RuleBase:RU361194, ECO:0000256|SAAS:SAAS00553137}.
D5K9V1	POU5F1P4	Evidence at transcript level	GO:0005634; GO:0043565; GO:0003700; GO:0006351		SUBCELLULAR LOCATION: Nucleus {ECO:0000256|RuleBase:RU361194, ECO:0000256|SAAS:SAAS00553137}.
D5K9W5	POU5F1P4	Evidence at transcript level	GO:0005634; GO:0043565; GO:0003700; GO:0006351		SUBCELLULAR LOCATION: Nucleus {ECO:0000256|RuleBase:RU361194, ECO:0000256|SAAS:SAAS00553137}.
D5K9W6	POU5F1P4	Evidence at transcript level	GO:0003677; GO:0005634; GO:0003700; GO:0006351		SUBCELLULAR LOCATION: Nucleus {ECO:0000256|RuleBase:RU361194, ECO:0000256|SAAS:SAAS00553137}.
D5M8Q2	AR	Inferred from homology	GO:0004882; GO:0005634; GO:0043565; GO:0005496; GO:0006351; GO:0008270		SUBCELLULAR LOCATION: Nucleus {ECO:0000256|SAAS:SAAS00586772}.
D6R901	USP17L21	Inferred from homology	GO:0005783; GO:0005634; GO:0016579; GO:0036459; GO:0006511		SUBCELLULAR LOCATION: Nucleus {ECO:0000250}. Endoplasmic reticulum {ECO:0000250}.
D6R942	MEF2C	Evidence at protein level	GO:0003677; GO:0005634; GO:0006355; GO:0006351		SUBCELLULAR LOCATION: Nucleus {ECO:0000256|RuleBase:RU000476, ECO:0000256|SAAS:SAAS00579852}.
D6R955	PITX1	Evidence at protein level	GO:0003677; GO:0005634		SUBCELLULAR LOCATION: Nucleus {ECO:0000256|RuleBase:RU000682}.
D6R9B1	ELF2	Evidence at protein level	GO:0005634; GO:0043565; GO:0003700		SUBCELLULAR LOCATION: Nucleus {ECO:0000256|SAAS:SAAS00594387}.
D6R9B6	RPS3A	Evidence at protein level	GO:0005737; GO:0005730; GO:0005840; GO:0003735; GO:0006412		SUBCELLULAR LOCATION: Cytoplasm {ECO:0000256|SAAS:SAAS00583669}.
D6R9D4	SMAD5	Evidence at protein level	GO:0005634; GO:0003700; GO:0005667; GO:0006351; GO:0007179		SUBCELLULAR LOCATION: Nucleus {ECO:0000256|SAAS:SAAS00573677}.
D6R9N7	USP17L18	Inferred from homology	GO:0005783; GO:0005634; GO:0016579; GO:0036459; GO:0006511		SUBCELLULAR LOCATION: Nucleus {ECO:0000250}. Endoplasmic reticulum {ECO:0000250}.
D6R9P4	GNPDA1	Evidence at protein level	GO:0006044; GO:0005975; GO:0005737; GO:0004342; GO:0016787		SUBCELLULAR LOCATION: Cytoplasm {ECO:0000256|RuleBase:RU361197}.
D6R9U1	PITX1	Evidence at protein level	GO:0003677; GO:0005634		SUBCELLULAR LOCATION: Nucleus {ECO:0000256|RuleBase:RU000682}.
D6RA61	USP17L22	Inferred from homology	GO:0005783; GO:0005634; GO:0016579; GO:0036459; GO:0006511		SUBCELLULAR LOCATION: Nucleus {ECO:0000250}. Endoplasmic reticulum {ECO:0000250}.
D6RA96	RTEL1-TNFRSF6B	Inferred from homology	GO:0051539; GO:0005524; GO:0004003; GO:0003677; GO:0006310; GO:0006281; GO:0006260; GO:0046872; GO:0005634; GO:0010569; GO:0000723		SUBCELLULAR LOCATION: Nucleus {ECO:0000256|HAMAP-Rule:MF_03065}. Note=Colocalizes with PCNA within the replication foci in S-phase cells. {ECO:0000256|HAMAP-Rule:MF_03065}.
D6RAR5	NA	Predicted	GO:0005634; GO:0006355; GO:0043565		SUBCELLULAR LOCATION: Nucleus {ECO:0000256|RuleBase:RU000682, ECO:0000256|SAAS:SAAS00544279}.
D6RAS8	IRX4	Evidence at protein level	GO:0003677; GO:0005634; GO:0006355		SUBCELLULAR LOCATION: Nucleus {ECO:0000256|SAAS:SAAS00563020}.
D6RAT0	RPS3A	Evidence at protein level	GO:0030154; GO:0005737; GO:0022627; GO:0005730; GO:0003735; GO:0006412		SUBCELLULAR LOCATION: Cytoplasm {ECO:0000256|HAMAP-Rule:MF_03122}. Nucleus {ECO:0000256|HAMAP-Rule:MF_03122}. Note=Localized in cytoplasmic mRNP granules containing untranslated mRNAs. {ECO:0000256|HAMAP-Rule:MF_03122}.
D6RAY1	SMAD1	Evidence at protein level	GO:0005634; GO:0003700; GO:0005667; GO:0006351; GO:0007179		SUBCELLULAR LOCATION: Nucleus {ECO:0000256|SAAS:SAAS00573677}.
D6RAY7	GNPDA1	Evidence at protein level	GO:0006044; GO:0005975; GO:0005737; GO:0004342; GO:0016787		SUBCELLULAR LOCATION: Cytoplasm {ECO:0000256|RuleBase:RU361197}.
D6RB09	RPS3A	Evidence at protein level	GO:0005737; GO:0005730; GO:0005840; GO:0003735; GO:0006412		SUBCELLULAR LOCATION: Cytoplasm {ECO:0000256|SAAS:SAAS00535981}.
D6RB13	GNPDA1	Evidence at protein level	GO:0006044; GO:0005975; GO:0005737; GO:0004342; GO:0016787		SUBCELLULAR LOCATION: Cytoplasm {ECO:0000256|RuleBase:RU361197}.
D6RB91	MEF2C	Evidence at protein level	GO:0003677; GO:0005634; GO:0006355; GO:0006351		SUBCELLULAR LOCATION: Nucleus {ECO:0000256|RuleBase:RU000476, ECO:0000256|SAAS:SAAS00579852}.
D6RBB4	SMAD5	Evidence at protein level	GO:0005634; GO:0003700; GO:0005667; GO:0006351; GO:0007179		SUBCELLULAR LOCATION: Nucleus {ECO:0000256|SAAS:SAAS00573677}.
D6RBG8	PITX2	Predicted	GO:0005634; GO:0006355; GO:0043565		SUBCELLULAR LOCATION: Nucleus {ECO:0000256|RuleBase:RU000682, ECO:0000256|SAAS:SAAS00544279}.
D6RBI3	RARB	Evidence at protein level	GO:0005634; GO:0003708; GO:0043565; GO:0003707; GO:0006351; GO:0008270		SUBCELLULAR LOCATION: Nucleus {ECO:0000256|SAAS:SAAS00595767}.
D6RBJ1	ISL1	Evidence at protein level	GO:0005654; GO:0006355; GO:0043565; GO:0008270		SUBCELLULAR LOCATION: Nucleus {ECO:0000256|RuleBase:RU000682, ECO:0000256|SAAS:SAAS00397436}.
D6RBM5	USP17L23	Uncertain	GO:0005783; GO:0005634; GO:0016579; GO:0036459; GO:0006511		SUBCELLULAR LOCATION: Nucleus {ECO:0000250}. Endoplasmic reticulum {ECO:0000250}.
D6RBQ6	USP17L17	Inferred from homology	GO:0005783; GO:0005634; GO:0016579; GO:0036459; GO:0006511		SUBCELLULAR LOCATION: Nucleus {ECO:0000250}. Endoplasmic reticulum {ECO:0000250}.
D6RC63	MEF2C	Evidence at protein level	GO:0003677; GO:0005634; GO:0006355; GO:0006351		SUBCELLULAR LOCATION: Nucleus {ECO:0000256|RuleBase:RU000476, ECO:0000256|SAAS:SAAS00579852}.
D6RCF2	H2AFY	Evidence at protein level	GO:0003677; GO:0000786; GO:0005634		SUBCELLULAR LOCATION: Nucleus {ECO:0000256|RuleBase:RU000527}.
D6RCM6	MEF2C	Evidence at protein level	GO:0003677; GO:0005634; GO:0006355; GO:0006351		SUBCELLULAR LOCATION: Nucleus {ECO:0000256|RuleBase:RU000476, ECO:0000256|SAAS:SAAS00579852}.
D6RCP7	USP17L19	Inferred from homology	GO:0005783; GO:0005634; GO:0016579; GO:0036459; GO:0006511		SUBCELLULAR LOCATION: Nucleus {ECO:0000250}. Endoplasmic reticulum {ECO:0000250}.
D6RD62	SMAD1	Evidence at protein level	GO:0005634; GO:0003700; GO:0005667; GO:0006351; GO:0007179		SUBCELLULAR LOCATION: Nucleus {ECO:0000256|SAAS:SAAS00573677}.
D6RDN7	SMAD1	Evidence at protein level	GO:0005634; GO:0003700; GO:0005667; GO:0006351; GO:0007179		SUBCELLULAR LOCATION: Nucleus {ECO:0000256|SAAS:SAAS00573677}.
D6REQ3	SMAD1	Evidence at protein level	GO:0005634; GO:0003700; GO:0005667; GO:0006351; GO:0007179		SUBCELLULAR LOCATION: Nucleus {ECO:0000256|SAAS:SAAS00573677}.
D6REZ7	NR1I3	Inferred from homology	GO:0003677; GO:0005654; GO:0003707; GO:0004887; GO:0006351		SUBCELLULAR LOCATION: Nucleus {ECO:0000256|SAAS:SAAS00595767}.
D6RFF8	GNPDA1	Evidence at protein level	GO:0006044; GO:0005975; GO:0005737; GO:0004342; GO:0016787		SUBCELLULAR LOCATION: Cytoplasm {ECO:0000256|RuleBase:RU361197}.
D6RFI4	PITX2	Evidence at protein level	GO:0005634; GO:0043565; GO:0003700		SUBCELLULAR LOCATION: Nucleus {ECO:0000256|RuleBase:RU000682, ECO:0000256|SAAS:SAAS00094553}.
D6RG13	RPS3A	Evidence at protein level	GO:0005737; GO:0005730; GO:0005840; GO:0003735; GO:0006412		SUBCELLULAR LOCATION: Cytoplasm {ECO:0000256|SAAS:SAAS00535981}.
D6RG14	MEF2C	Predicted	GO:0003677; GO:0005634; GO:0006355; GO:0006351		SUBCELLULAR LOCATION: Nucleus {ECO:0000256|RuleBase:RU000476, ECO:0000256|SAAS:SAAS00579852}.
D6RG21	MEF2C	Evidence at protein level	GO:0003677; GO:0005634; GO:0006355; GO:0006351		SUBCELLULAR LOCATION: Nucleus {ECO:0000256|RuleBase:RU000476, ECO:0000256|SAAS:SAAS00579852}.
D6RGH6	MCIDAS	Evidence at protein level	GO:0007049; GO:0098534; GO:0042384; GO:0042802; GO:0044458; GO:1903251; GO:0005634; GO:0045944; GO:0006275; GO:0007346; GO:0003713; GO:0006351		SUBCELLULAR LOCATION: Nucleus {ECO:0000269|PubMed:21543332}. Note=Excluded from the nucleolus. {ECO:0000269|PubMed:21543332}.
D6RHI1	ELF2	Evidence at protein level	GO:0005634; GO:0043565; GO:0003700		SUBCELLULAR LOCATION: Nucleus {ECO:0000256|SAAS:SAAS00594387}.
D6RI02	RPS3A	Evidence at protein level	GO:0005840; GO:0003735; GO:0006412		SUBCELLULAR LOCATION: Cytoplasm {ECO:0000256|SAAS:SAAS00583669}.
D6RIZ9	SMAD5	Evidence at protein level	GO:0005634; GO:0003700; GO:0005667; GO:0006351; GO:0007179		SUBCELLULAR LOCATION: Nucleus {ECO:0000256|SAAS:SAAS00573677}.
D6RJ95	MEF2C	Predicted	GO:0003677; GO:0005634; GO:0006355; GO:0006351		SUBCELLULAR LOCATION: Nucleus {ECO:0000256|RuleBase:RU000476, ECO:0000256|SAAS:SAAS00579852}.
D6RJA7	MEF2C	Evidence at protein level	GO:0003677; GO:0005634; GO:0006355; GO:0006351		SUBCELLULAR LOCATION: Nucleus {ECO:0000256|RuleBase:RU000476, ECO:0000256|SAAS:SAAS00579852}.
D6RJB6	USP17L20	Inferred from homology	GO:0005783; GO:0005634; GO:0016579; GO:0036459; GO:0006511		SUBCELLULAR LOCATION: Nucleus {ECO:0000250}. Endoplasmic reticulum {ECO:0000250}.
D6RJG6	MEF2C	Evidence at protein level	GO:0003677; GO:0005737; GO:0043231; GO:0005654; GO:0006355; GO:0006351		SUBCELLULAR LOCATION: Nucleus {ECO:0000256|RuleBase:RU000476, ECO:0000256|SAAS:SAAS00579852}.
D6W5A2	MTA3	Evidence at protein level	GO:0016581; GO:0003682; GO:0008278; GO:0005737; GO:0043231; GO:0005634; GO:0010971; GO:0008284; GO:0043565; GO:0003700; GO:0008270		SUBCELLULAR LOCATION: Nucleus {ECO:0000256|SAAS:SAAS00548613}.
D6W5E5	OTX1	Predicted	GO:0007275; GO:0005634; GO:0043565; GO:0003700		SUBCELLULAR LOCATION: Nucleus {ECO:0000256|RuleBase:RU000682}.
D6W5J0	hCG_41062	Predicted	GO:0005634; GO:0006355; GO:0043565		SUBCELLULAR LOCATION: Nucleus {ECO:0000256|RuleBase:RU000682, ECO:0000256|SAAS:SAAS00544279}.
D8L7E9	MEF2C	Evidence at protein level	GO:0003677; GO:0005634; GO:0006355; GO:0006351		SUBCELLULAR LOCATION: Nucleus {ECO:0000256|RuleBase:RU000476, ECO:0000256|SAAS:SAAS00579852}.
D9IVD5	NFIL3	Evidence at transcript level	GO:0007623; GO:0006955; GO:0005634; GO:0043565; GO:0003700; GO:0006366		SUBCELLULAR LOCATION: Nucleus {ECO:0000256|PIRNR:PIRNR019029}.
D9J0B8	NA	Inferred from homology	GO:0003677; GO:0030154; GO:0030238; GO:0005634; GO:0007548; GO:0003700; GO:0006351		SUBCELLULAR LOCATION: Nucleus {ECO:0000256|SAAS:SAAS00548902}.
D9J0B9	NA	Inferred from homology	GO:0003677; GO:0030154; GO:0030238; GO:0005634; GO:0007548; GO:0003700; GO:0006351		SUBCELLULAR LOCATION: Nucleus {ECO:0000256|SAAS:SAAS00548902}.
D9J0C1	NA	Inferred from homology	GO:0003677; GO:0030154; GO:0030238; GO:0005634; GO:0007548; GO:0003700; GO:0006351		SUBCELLULAR LOCATION: Nucleus {ECO:0000256|SAAS:SAAS00548902}.
D9J0C2	NA	Inferred from homology	GO:0003677; GO:0030154; GO:0030238; GO:0005634; GO:0007548; GO:0003700; GO:0006351		SUBCELLULAR LOCATION: Nucleus {ECO:0000256|SAAS:SAAS00548902}.
D9J0C3	NA	Inferred from homology	GO:0003677; GO:0030154; GO:0030238; GO:0005634; GO:0007548; GO:0003700; GO:0006351		SUBCELLULAR LOCATION: Nucleus {ECO:0000256|SAAS:SAAS00548902}.
D9J0C4	NA	Inferred from homology	GO:0003677; GO:0030154; GO:0030238; GO:0005634; GO:0007548; GO:0003700; GO:0006351		SUBCELLULAR LOCATION: Nucleus {ECO:0000256|SAAS:SAAS00548902}.
D9J0C5	NA	Inferred from homology	GO:0003677; GO:0030154; GO:0030238; GO:0005634; GO:0007548; GO:0003700; GO:0006351		SUBCELLULAR LOCATION: Nucleus {ECO:0000256|SAAS:SAAS00548902}.
D9J0C7	NA	Inferred from homology	GO:0003677; GO:0030154; GO:0030238; GO:0005634; GO:0007548; GO:0003700; GO:0006351		SUBCELLULAR LOCATION: Nucleus {ECO:0000256|SAAS:SAAS00548902}.
D9J0C8	NA	Inferred from homology	GO:0003677; GO:0030154; GO:0030238; GO:0005634; GO:0007548; GO:0003700; GO:0006351		SUBCELLULAR LOCATION: Nucleus {ECO:0000256|SAAS:SAAS00548902}.
D9J2M0	SRY	Inferred from homology	GO:0003677; GO:0030154; GO:0030238; GO:0005634; GO:0007548; GO:0003700; GO:0006351		SUBCELLULAR LOCATION: Nucleus {ECO:0000256|SAAS:SAAS00548902}.
D9J2M1	SRY	Inferred from homology	GO:0003677; GO:0030154; GO:0030238; GO:0005634; GO:0007548; GO:0003700; GO:0006351		SUBCELLULAR LOCATION: Nucleus {ECO:0000256|SAAS:SAAS00548902}.
D9J2M2	SRY	Inferred from homology	GO:0003677; GO:0030154; GO:0030238; GO:0005634; GO:0007548; GO:0003700; GO:0006351		SUBCELLULAR LOCATION: Nucleus {ECO:0000256|SAAS:SAAS00548902}.
D9J2M3	SRY	Inferred from homology	GO:0003677; GO:0030154; GO:0030238; GO:0005634; GO:0007548; GO:0003700; GO:0006351		SUBCELLULAR LOCATION: Nucleus {ECO:0000256|SAAS:SAAS00548902}.
D9J2M4	SRY	Inferred from homology	GO:0003677; GO:0030154; GO:0030238; GO:0005634; GO:0007548; GO:0003700; GO:0006351		SUBCELLULAR LOCATION: Nucleus {ECO:0000256|SAAS:SAAS00548902}.
D9ZGG0	TBX1	Predicted	GO:0003677; GO:0005634; GO:0003700; GO:0006351		SUBCELLULAR LOCATION: Nucleus {ECO:0000256|SAAS:SAAS00353240}.
E0YLM6	DUX4	Predicted	GO:0003677; GO:0005634		SUBCELLULAR LOCATION: Nucleus {ECO:0000256|RuleBase:RU000682}.
E0YMI7	HNF1A	Evidence at transcript level	GO:0003677; GO:0005634; GO:0045893		SUBCELLULAR LOCATION: Nucleus {ECO:0000256|RuleBase:RU000682}.
E0YMJ3	HNF1A	Evidence at transcript level	GO:0003677; GO:0005634; GO:0045893		SUBCELLULAR LOCATION: Nucleus {ECO:0000256|RuleBase:RU000682}.
E0YMJ4	HNF1A	Evidence at transcript level	GO:0003677; GO:0005634; GO:0045893		SUBCELLULAR LOCATION: Nucleus {ECO:0000256|RuleBase:RU000682}.
E0YMJ6	HNF1B	Evidence at transcript level	GO:0003677; GO:0005654; GO:0045893		SUBCELLULAR LOCATION: Nucleus {ECO:0000256|RuleBase:RU000682}.
E0YMJ8	HNF1B	Evidence at protein level	GO:0003677; GO:0005654; GO:0045893		SUBCELLULAR LOCATION: Nucleus {ECO:0000256|RuleBase:RU000682}.
E0Z3E7	DUX4	Predicted	GO:0003677; GO:0005634		SUBCELLULAR LOCATION: Nucleus {ECO:0000256|RuleBase:RU000682}.
E0Z3E8	DUX4	Predicted	GO:0003677; GO:0005634		SUBCELLULAR LOCATION: Nucleus {ECO:0000256|RuleBase:RU000682}.
E0Z3E9	DUX4	Predicted	GO:0003677; GO:0005634		SUBCELLULAR LOCATION: Nucleus {ECO:0000256|RuleBase:RU000682}.
E0Z3F0	DUX4	Predicted	GO:0003677; GO:0005634		SUBCELLULAR LOCATION: Nucleus {ECO:0000256|RuleBase:RU000682}.
E0Z3F1	DUX4	Predicted	GO:0003677; GO:0005634		SUBCELLULAR LOCATION: Nucleus {ECO:0000256|RuleBase:RU000682}.
E0Z3F3	DUX4	Predicted	GO:0003677; GO:0005634		SUBCELLULAR LOCATION: Nucleus {ECO:0000256|RuleBase:RU000682}.
E0Z3F7	DUX4	Predicted	GO:0003677; GO:0005634		SUBCELLULAR LOCATION: Nucleus {ECO:0000256|RuleBase:RU000682}.
E0Z3G4	DUX4	Predicted	GO:0003677; GO:0005634		SUBCELLULAR LOCATION: Nucleus {ECO:0000256|RuleBase:RU000682}.
E0Z3H0	DUX4	Predicted	GO:0003677; GO:0005634		SUBCELLULAR LOCATION: Nucleus {ECO:0000256|RuleBase:RU000682}.
E0Z3H2	DUX4	Predicted	GO:0003677; GO:0005634		SUBCELLULAR LOCATION: Nucleus {ECO:0000256|RuleBase:RU000682}.
E0Z3H5	DUX4	Predicted	GO:0003677; GO:0005634		SUBCELLULAR LOCATION: Nucleus {ECO:0000256|RuleBase:RU000682}.
E2G6R5	TP53	Inferred from homology	GO:0006915; GO:0007049; GO:0005737; GO:0046872; GO:0005634; GO:0003700; GO:0044212; GO:0006351		SUBCELLULAR LOCATION: Cytoplasm {ECO:0000256|RuleBase:RU003304}. Nucleus {ECO:0000256|RuleBase:RU003304}.
E2JJS1	NA	Evidence at transcript level	GO:0003677; GO:0005634		SUBCELLULAR LOCATION: Nucleus {ECO:0000256|RuleBase:RU000682}.
E3UVQ2	BCOR-RARA	Evidence at transcript level	GO:0005634; GO:0003708; GO:0043565; GO:0003707; GO:0006351; GO:0008270		SUBCELLULAR LOCATION: Nucleus {ECO:0000256|SAAS:SAAS00595767}.
E3VSK7	NA	Evidence at transcript level	GO:0005634; GO:0003708; GO:0043565; GO:0003707; GO:0006351; GO:0008270		SUBCELLULAR LOCATION: Nucleus {ECO:0000256|SAAS:SAAS00595767}.
E5KN95	APEX2	Inferred from homology	GO:0003677; GO:0006281; GO:0003906; GO:0043231; GO:0005739; GO:0005730; GO:0005634; GO:0008270		SUBCELLULAR LOCATION: Nucleus {ECO:0000256|RuleBase:RU362131}. Cytoplasm {ECO:0000256|RuleBase:RU362131}. Mitochondrion {ECO:0000256|RuleBase:RU362131}.
E5KNB2	NA	Inferred from homology	GO:0003677; GO:0006281; GO:0003906; GO:0005739; GO:0005634; GO:0008270		SUBCELLULAR LOCATION: Nucleus {ECO:0000256|RuleBase:RU362131}. Cytoplasm {ECO:0000256|RuleBase:RU362131}. Mitochondrion {ECO:0000256|RuleBase:RU362131}.
E5KNC9	NA	Inferred from homology	GO:0003677; GO:0006281; GO:0003906; GO:0005739; GO:0005634; GO:0008270		SUBCELLULAR LOCATION: Nucleus {ECO:0000256|RuleBase:RU362131}. Cytoplasm {ECO:0000256|RuleBase:RU362131}. Mitochondrion {ECO:0000256|RuleBase:RU362131}.
E5KQF5	NR3C1	Inferred from homology	GO:0005737; GO:0004883; GO:0005654; GO:0043565; GO:0005496; GO:0003700; GO:0006351; GO:0008270		SUBCELLULAR LOCATION: Nucleus {ECO:0000256|SAAS:SAAS00595767}.
E5KQF6	NR3C1	Inferred from homology	GO:0005737; GO:0004883; GO:0005654; GO:0043565; GO:0005496; GO:0003700; GO:0006351; GO:0008270		SUBCELLULAR LOCATION: Nucleus {ECO:0000256|SAAS:SAAS00595767}.
E5KRP5	SPAST	Inferred from homology	GO:0005524; GO:0006888; GO:0007409; GO:0005813; GO:0032506; GO:0005783; GO:0005768; GO:0016021; GO:0005874; GO:0051013; GO:0008568; GO:0030496; GO:0005634; GO:0048471; GO:0031117; GO:0034214; GO:0005819		SUBCELLULAR LOCATION: Membrane {ECO:0000256|HAMAP-Rule:MF_03021}; Single-pass membrane protein {ECO:0000256|HAMAP-Rule:MF_03021}. Cytoplasm, cytoskeleton, microtubule organizing center, centrosome {ECO:0000256|HAMAP-Rule:MF_03021}. Cytoplasm, cytoskeleton {ECO:0000256|HAMAP-Rule:MF_03021}. Cytoplasm, perinuclear region {ECO:0000256|HAMAP-Rule:MF_03021}. Endoplasmic reticulum {ECO:0000256|HAMAP-Ru…	TRANSMEM 57 77 Helical. {ECO:0000256|HAMAP-Rule:MF_03021}.
E5KRP6	SPAST	Inferred from homology	GO:0005524; GO:0006888; GO:0007409; GO:0005813; GO:0032506; GO:0005783; GO:0005768; GO:0016021; GO:0005874; GO:0051013; GO:0008568; GO:0030496; GO:0005634; GO:0048471; GO:0031117; GO:0034214; GO:0005819		SUBCELLULAR LOCATION: Membrane {ECO:0000256|HAMAP-Rule:MF_03021}; Single-pass membrane protein {ECO:0000256|HAMAP-Rule:MF_03021}. Cytoplasm, cytoskeleton, microtubule organizing center, centrosome {ECO:0000256|HAMAP-Rule:MF_03021}. Cytoplasm, cytoskeleton {ECO:0000256|HAMAP-Rule:MF_03021}. Cytoplasm, perinuclear region {ECO:0000256|HAMAP-Rule:MF_03021}. Endoplasmic reticulum {ECO:0000256|HAMAP-Ru…	TRANSMEM 57 77 Helical. {ECO:0000256|HAMAP-Rule:MF_03021}.
E5KTA5	UNG	Inferred from homology	GO:0006284; GO:0005739; GO:0043066; GO:0005634; GO:0045830; GO:0016446; GO:0016447; GO:0004844		SUBCELLULAR LOCATION: Mitochondrion {ECO:0000256|HAMAP-Rule:MF_03166}. Nucleus {ECO:0000256|HAMAP-Rule:MF_03166}.
E5KTA6	UNG	Inferred from homology	GO:0006284; GO:0005739; GO:0005634; GO:0004844		SUBCELLULAR LOCATION: Mitochondrion {ECO:0000256|HAMAP-Rule:MF_03166}. Nucleus {ECO:0000256|HAMAP-Rule:MF_03166}.
E5KTI5	NTHL1	Inferred from homology	GO:0051539; GO:0003677; GO:0006285; GO:0046872; GO:0005739; GO:0006296; GO:0005634; GO:0000703		SUBCELLULAR LOCATION: Nucleus {ECO:0000256|HAMAP-Rule:MF_03183}. Mitochondrion {ECO:0000256|HAMAP-Rule:MF_03183}.
E5RFF9	GINS4	Evidence at protein level	GO:0006260; GO:0005634		SUBCELLULAR LOCATION: Nucleus {ECO:0000256|PIRNR:PIRNR007764, ECO:0000256|SAAS:SAAS00542169}.
E5RFQ1	EBF1	Evidence at protein level	GO:0003677; GO:0046872; GO:0007275; GO:0005634; GO:0006355; GO:0006351		SUBCELLULAR LOCATION: Nucleus {ECO:0000256|RuleBase:RU004489}.
E5RG51	HSF4	Inferred from homology	GO:0005634; GO:0006357; GO:0043565; GO:0003700		SUBCELLULAR LOCATION: Nucleus {ECO:0000256|SAAS:SAAS00535900}.
E5RGZ2	HMBOX1	Evidence at protein level	GO:0003677; GO:0005634; GO:0045893		SUBCELLULAR LOCATION: Nucleus {ECO:0000256|RuleBase:RU000682}.
E5RHK6	HEY1	Predicted	GO:0003677; GO:0005634; GO:0006355; GO:0006351		SUBCELLULAR LOCATION: Nucleus {ECO:0000256|SAAS:SAAS00573650}.
E5RHS5	EIF3E	Evidence at protein level	GO:0005852; GO:0003743		SUBCELLULAR LOCATION: Cytoplasm {ECO:0000256|SAAS:SAAS00545126}.
E5RHX8	ENY2	Evidence at protein level	GO:0071819; GO:0000124; GO:0016578; GO:0030374; GO:0006406; GO:0005643; GO:0045893; GO:0015031; GO:0006368; GO:0070390		SUBCELLULAR LOCATION: Nucleus, nucleoplasm {ECO:0000256|HAMAP-Rule:MF_03046}. Nucleus, nuclear pore complex {ECO:0000256|HAMAP-Rule:MF_03046}.
E5RII3	EIF3E	Evidence at protein level	GO:0005852; GO:0003743		SUBCELLULAR LOCATION: Cytoplasm {ECO:0000256|SAAS:SAAS00545126}.
E5RIT4	EIF3E	Evidence at protein level	GO:0005852; GO:0003743		SUBCELLULAR LOCATION: Cytoplasm {ECO:0000256|SAAS:SAAS00545126}.
E5RJV4	HSF4	Inferred from homology	GO:0005634; GO:0006357; GO:0043565; GO:0003700		SUBCELLULAR LOCATION: Nucleus {ECO:0000256|SAAS:SAAS00535900}.
E5RK26	HSF4	Evidence at protein level	GO:0005654; GO:0006357; GO:0043565; GO:0003700		SUBCELLULAR LOCATION: Nucleus {ECO:0000256|SAAS:SAAS00535900}.
E5RMA8	TP53	Inferred from homology	GO:0006915; GO:0007049; GO:0005737; GO:0046872; GO:0005634; GO:0051262; GO:0003700; GO:0044212; GO:0006351		SUBCELLULAR LOCATION: Cytoplasm {ECO:0000256|RuleBase:RU003304}. Nucleus {ECO:0000256|RuleBase:RU003304}.
E7EMR6	TP53	Evidence at protein level	GO:0006915; GO:0007049; GO:0005737; GO:0046872; GO:0005634; GO:0003700; GO:0044212; GO:0006351		SUBCELLULAR LOCATION: Cytoplasm {ECO:0000256|RuleBase:RU003304}. Nucleus {ECO:0000256|RuleBase:RU003304}.
E7EPN6	PKNOX1	Evidence at protein level	GO:0003677; GO:0005634; GO:0006355		SUBCELLULAR LOCATION: Nucleus {ECO:0000256|SAAS:SAAS00563020}.
E7EQB3	TSEN34	Evidence at protein level	GO:0016829; GO:0003676; GO:0005634; GO:0000213; GO:0000214; GO:0000379		SUBCELLULAR LOCATION: Nucleus {ECO:0000256|PIRNR:PIRNR017250}.
E7EQR6	TCP1	Evidence at protein level	GO:0005524; GO:0005737		SUBCELLULAR LOCATION: Cytoplasm {ECO:0000256|SAAS:SAAS00547836}.
E7EQT0	PAX5	Evidence at protein level	GO:0003677; GO:0007275; GO:0005634; GO:0006355; GO:0006351		SUBCELLULAR LOCATION: Nucleus {ECO:0000256|RuleBase:RU000491, ECO:0000256|SAAS:SAAS00117811}.
E7EQV3	PABPC1	Evidence at protein level	GO:0003723; GO:0005737; GO:0000166		SUBCELLULAR LOCATION: Cytoplasm {ECO:0000256|RuleBase:RU362004}.
E7EQX7	TP53	Evidence at protein level	GO:0006915; GO:0007049; GO:0005737; GO:0046872; GO:0005634; GO:0003700; GO:0044212; GO:0006351		SUBCELLULAR LOCATION: Cytoplasm {ECO:0000256|RuleBase:RU003304}. Nucleus {ECO:0000256|RuleBase:RU003304}.
E7EQY4	MTA3	Evidence at protein level	GO:0003682; GO:0043231; GO:0005634; GO:0043565; GO:0003700; GO:0008270		SUBCELLULAR LOCATION: Nucleus {ECO:0000256|SAAS:SAAS00548613}.
E7ERF2	TCP1	Evidence at protein level	GO:0005524; GO:0005737; GO:0006457		SUBCELLULAR LOCATION: Cytoplasm {ECO:0000256|SAAS:SAAS00547836}.
E7ERJ7	PABPC1	Evidence at protein level	GO:0003723; GO:0005737; GO:0000166		SUBCELLULAR LOCATION: Cytoplasm {ECO:0000256|RuleBase:RU362004}.
E7ERW5	PAX5	Evidence at protein level	GO:0003677; GO:0007275; GO:0005634; GO:0006355; GO:0006351		SUBCELLULAR LOCATION: Nucleus {ECO:0000256|RuleBase:RU000491, ECO:0000256|SAAS:SAAS00117811}.
E7ESS1	TP53	Evidence at protein level	GO:0006915; GO:0007049; GO:0005737; GO:0046872; GO:0005634; GO:0003700; GO:0044212; GO:0006351		SUBCELLULAR LOCATION: Cytoplasm {ECO:0000256|RuleBase:RU003304}. Nucleus {ECO:0000256|RuleBase:RU003304}.
E7ESY4	MTA1	Evidence at protein level	GO:0003682; GO:0005737; GO:0043231; GO:0005654; GO:0043565; GO:0003700; GO:0008270		SUBCELLULAR LOCATION: Nucleus {ECO:0000256|SAAS:SAAS00548613}.
E7ET07	ING3	Evidence at protein level	GO:0016568; GO:0005737; GO:0005730; GO:0005634; GO:0008270		SUBCELLULAR LOCATION: Nucleus {ECO:0000256|RuleBase:RU361213}.
E7ETH6	ZNF587B	Evidence at protein level	GO:0000977; GO:0046872; GO:0045892; GO:0005634; GO:0003700		SUBCELLULAR LOCATION: Nucleus {ECO:0000305}.
E7ETK1	EPC2	Evidence at protein level	GO:0032777; GO:0006357; GO:0006351		SUBCELLULAR LOCATION: Nucleus {ECO:0000256|RuleBase:RU361124}.
E7ETR0	RUVBL1	Evidence at protein level	GO:0005524; GO:0043141; GO:0006310; GO:0006281; GO:0005794; GO:0005737; GO:0043231; GO:0005654; GO:0006355; GO:0006351		SUBCELLULAR LOCATION: Nucleus {ECO:0000256|RuleBase:RU363048, ECO:0000256|SAAS:SAAS00339597}.
E7EUP3	KAT7	Evidence at protein level	GO:0005737; GO:0004402; GO:0005654; GO:0003700; GO:0008270		SUBCELLULAR LOCATION: Nucleus {ECO:0000256|RuleBase:RU361211}.
E7EUW9	ZEB2	Evidence at protein level	GO:0003677; GO:0046872; GO:0005634		SUBCELLULAR LOCATION: Nucleus {ECO:0000256|RuleBase:RU000682}.
E7EV10	MTA3	Evidence at protein level	GO:0003682; GO:0005634; GO:0043565; GO:0003700; GO:0008270		SUBCELLULAR LOCATION: Nucleus {ECO:0000256|SAAS:SAAS00548613}.
E7EVA0	MAP4	Evidence at protein level	GO:0005737; GO:0005874; GO:0015630; GO:0005886		SUBCELLULAR LOCATION: Cytoplasm, cytoskeleton {ECO:0000256|RuleBase:RU000686}.
E7EVB6	DTNB	Evidence at protein level	GO:0005737; GO:0008270		SUBCELLULAR LOCATION: Cytoplasm {ECO:0000256|PIRNR:PIRNR038204}.
E7EVE9	ERCC2	Evidence at protein level	GO:0005524; GO:0004003; GO:0003677; GO:0006139; GO:0005634		SUBCELLULAR LOCATION: Nucleus {ECO:0000256|SAAS:SAAS00553264}.
E7EVU5	NCOR1	Evidence at protein level	GO:0003677; GO:0005634		SUBCELLULAR LOCATION: Nucleus {ECO:0000256|SAAS:SAAS00548613}.
E7EVZ1	ZFHX4	Evidence at protein level	GO:0005634; GO:0006355; GO:0043565; GO:0008270		SUBCELLULAR LOCATION: Nucleus {ECO:0000256|RuleBase:RU000682}.
E7EW50	NCOR1	Evidence at protein level	GO:0003677; GO:0005634		SUBCELLULAR LOCATION: Nucleus {ECO:0000256|SAAS:SAAS00548613}.
E7EWD9	ESRRB	Evidence at protein level	GO:0005634; GO:0043565; GO:0005496; GO:0003707; GO:0003700; GO:0006351; GO:0008270		SUBCELLULAR LOCATION: Nucleus {ECO:0000256|SAAS:SAAS00595767}.
E7EWM1	NCOA2	Evidence at protein level	GO:0004402; GO:0030374; GO:0005634; GO:0006355; GO:0006351		SUBCELLULAR LOCATION: Nucleus {ECO:0000256|SAAS:SAAS00600858}.
E7EWW4	HSF4	Inferred from homology	GO:0005634; GO:0006357; GO:0043565; GO:0003700		SUBCELLULAR LOCATION: Nucleus {ECO:0000256|SAAS:SAAS00535900}.
E9KL30	NA	Evidence at transcript level	GO:0005737; GO:0005654; GO:0005839; GO:0051603; GO:0004298		SUBCELLULAR LOCATION: Cytoplasm {ECO:0000256|RuleBase:RU000694}. Nucleus {ECO:0000256|RuleBase:RU000694}.; SUBCELLULAR LOCATION: Nucleus {ECO:0000256|SAAS:SAAS00551005}.
E9KXS6	MSX1	Predicted	GO:0005634; GO:0006355; GO:0043565		SUBCELLULAR LOCATION: Nucleus {ECO:0000256|RuleBase:RU000682, ECO:0000256|SAAS:SAAS00544279}.
E9KY40	PAX9	Predicted	GO:0003677; GO:0005634; GO:0009887; GO:0003700; GO:0006351		SUBCELLULAR LOCATION: Nucleus {ECO:0000256|RuleBase:RU000491, ECO:0000256|SAAS:SAAS00117811}.
E9LR73	POU5F1	Evidence at transcript level	GO:0005634; GO:0043565; GO:0003700; GO:0006351		SUBCELLULAR LOCATION: Nucleus {ECO:0000256|RuleBase:RU361194, ECO:0000256|SAAS:SAAS00553137}.
E9LR75	POU5F1	Evidence at transcript level	GO:0005634; GO:0043565; GO:0003700; GO:0006351		SUBCELLULAR LOCATION: Nucleus {ECO:0000256|RuleBase:RU361194, ECO:0000256|SAAS:SAAS00553137}.
E9LR77	POU5F1	Evidence at transcript level	GO:0005634; GO:0043565; GO:0003700; GO:0006351		SUBCELLULAR LOCATION: Nucleus {ECO:0000256|RuleBase:RU361194, ECO:0000256|SAAS:SAAS00553137}.
E9LR79	POU5F1	Evidence at transcript level	GO:0003677; GO:0005634; GO:0003700; GO:0006351		SUBCELLULAR LOCATION: Nucleus {ECO:0000256|RuleBase:RU361194, ECO:0000256|SAAS:SAAS00553137}.
E9LR91	POU5F1P4	Evidence at transcript level	GO:0005634; GO:0043565; GO:0003700; GO:0006351		SUBCELLULAR LOCATION: Nucleus {ECO:0000256|RuleBase:RU361194, ECO:0000256|SAAS:SAAS00553137}.
E9LR92	POU5F1P4	Evidence at transcript level	GO:0005634; GO:0043565; GO:0003700; GO:0006351		SUBCELLULAR LOCATION: Nucleus {ECO:0000256|RuleBase:RU361194, ECO:0000256|SAAS:SAAS00553137}.
E9LR93	POU5F1P4	Evidence at transcript level	GO:0005634; GO:0043565; GO:0003700; GO:0006351		SUBCELLULAR LOCATION: Nucleus {ECO:0000256|RuleBase:RU361194, ECO:0000256|SAAS:SAAS00553137}.
E9LR96	POU5F1P4	Evidence at transcript level	GO:0003677; GO:0005634; GO:0003700; GO:0006351		SUBCELLULAR LOCATION: Nucleus {ECO:0000256|RuleBase:RU361194, ECO:0000256|SAAS:SAAS00553137}.
E9LRA1	POU5F1P4	Evidence at transcript level	GO:0005634; GO:0043565; GO:0003700; GO:0006351		SUBCELLULAR LOCATION: Nucleus {ECO:0000256|RuleBase:RU361194, ECO:0000256|SAAS:SAAS00553137}.
E9LRF2	POU5F1P4	Evidence at transcript level	GO:0005634; GO:0043565; GO:0003700; GO:0006351		SUBCELLULAR LOCATION: Nucleus {ECO:0000256|RuleBase:RU361194, ECO:0000256|SAAS:SAAS00553137}.
E9LRF5	POU5F1P4	Evidence at transcript level	GO:0005634; GO:0043565; GO:0003700; GO:0006351		SUBCELLULAR LOCATION: Nucleus {ECO:0000256|RuleBase:RU361194, ECO:0000256|SAAS:SAAS00553137}.
E9LRF8	POU5F1P4	Evidence at transcript level	GO:0005634; GO:0043565; GO:0003700; GO:0006351		SUBCELLULAR LOCATION: Nucleus {ECO:0000256|RuleBase:RU361194, ECO:0000256|SAAS:SAAS00553137}.
E9LRJ2	POU5F1P4	Evidence at transcript level	GO:0005634; GO:0043565; GO:0003700; GO:0006351		SUBCELLULAR LOCATION: Nucleus {ECO:0000256|RuleBase:RU361194, ECO:0000256|SAAS:SAAS00553137}.
E9LRM0	POU5F1P4	Evidence at transcript level	GO:0005634; GO:0043565; GO:0003700; GO:0006351		SUBCELLULAR LOCATION: Nucleus {ECO:0000256|RuleBase:RU361194, ECO:0000256|SAAS:SAAS00553137}.
E9LRM1	POU5F1P4	Evidence at transcript level	GO:0005634; GO:0043565; GO:0003700; GO:0006351		SUBCELLULAR LOCATION: Nucleus {ECO:0000256|RuleBase:RU361194, ECO:0000256|SAAS:SAAS00553137}.
E9LRM2	POU5F1P4	Evidence at transcript level	GO:0005634; GO:0043565; GO:0003700; GO:0006351		SUBCELLULAR LOCATION: Nucleus {ECO:0000256|RuleBase:RU361194, ECO:0000256|SAAS:SAAS00553137}.
E9LRM3	POU5F1P4	Evidence at transcript level	GO:0005634; GO:0043565; GO:0003700; GO:0006351		SUBCELLULAR LOCATION: Nucleus {ECO:0000256|RuleBase:RU361194, ECO:0000256|SAAS:SAAS00553137}.
E9LRP2	POU5F1P4	Evidence at transcript level	GO:0005634; GO:0043565; GO:0003700; GO:0006351		SUBCELLULAR LOCATION: Nucleus {ECO:0000256|RuleBase:RU361194, ECO:0000256|SAAS:SAAS00553137}.
E9LRP3	POU5F1P4	Evidence at transcript level	GO:0005634; GO:0043565; GO:0003700; GO:0006351		SUBCELLULAR LOCATION: Nucleus {ECO:0000256|RuleBase:RU361194, ECO:0000256|SAAS:SAAS00553137}.
E9LRP4	POU5F1P4	Evidence at transcript level	GO:0005634; GO:0043565; GO:0003700; GO:0006351		SUBCELLULAR LOCATION: Nucleus {ECO:0000256|RuleBase:RU361194, ECO:0000256|SAAS:SAAS00553137}.
E9LRP6	POU5F1P4	Evidence at transcript level	GO:0005634; GO:0043565; GO:0003700; GO:0006351		SUBCELLULAR LOCATION: Nucleus {ECO:0000256|RuleBase:RU361194, ECO:0000256|SAAS:SAAS00553137}.
E9LRR8	POU5F1P4	Evidence at transcript level	GO:0005634; GO:0043565; GO:0003700; GO:0006351		SUBCELLULAR LOCATION: Nucleus {ECO:0000256|RuleBase:RU361194, ECO:0000256|SAAS:SAAS00553137}.
E9LRS9	POU5F1P4	Evidence at transcript level	GO:0005634; GO:0043565; GO:0003700; GO:0006351		SUBCELLULAR LOCATION: Nucleus {ECO:0000256|RuleBase:RU361194, ECO:0000256|SAAS:SAAS00553137}.
E9LRT0	POU5F1P4	Evidence at transcript level	GO:0005634; GO:0043565; GO:0003700; GO:0006351		SUBCELLULAR LOCATION: Nucleus {ECO:0000256|RuleBase:RU361194, ECO:0000256|SAAS:SAAS00553137}.
E9LRT1	POU5F1P4	Evidence at transcript level	GO:0005634; GO:0043565; GO:0003700; GO:0006351		SUBCELLULAR LOCATION: Nucleus {ECO:0000256|RuleBase:RU361194, ECO:0000256|SAAS:SAAS00553137}.
E9PAV3	NACA	Evidence at protein level	GO:0003677; GO:0005737; GO:0005634; GO:0006355; GO:0006351		SUBCELLULAR LOCATION: Cytoplasm {ECO:0000250}. Nucleus {ECO:0000250}.
E9PB28	HES4	Evidence at protein level	GO:0003677; GO:0005634; GO:0006355; GO:0006351		SUBCELLULAR LOCATION: Nucleus {ECO:0000256|SAAS:SAAS00573650}.
E9PBQ4	NR4A2	Evidence at protein level	GO:0004879; GO:0005634; GO:0043565; GO:0003707; GO:0006351; GO:0008270		SUBCELLULAR LOCATION: Nucleus {ECO:0000256|SAAS:SAAS00595767}.
E9PC52	RBBP7	Evidence at protein level	GO:0005634		SUBCELLULAR LOCATION: Nucleus {ECO:0000256|SAAS:SAAS00542127}.
E9PC66	ZKSCAN1	Evidence at protein level	GO:0046872; GO:0003676; GO:0005634; GO:0003700; GO:0006351		SUBCELLULAR LOCATION: Nucleus {ECO:0000256|SAAS:SAAS00574784}.
E9PCA1	CCT5	Evidence at protein level	GO:0005524; GO:0005737; GO:0005730; GO:0006457		SUBCELLULAR LOCATION: Cytoplasm {ECO:0000256|SAAS:SAAS00547836}.
E9PCF2	NR1I3	Inferred from homology	GO:0005654; GO:0043565; GO:0003707; GO:0004887; GO:0006351; GO:0008270		SUBCELLULAR LOCATION: Nucleus {ECO:0000256|SAAS:SAAS00595767}.
E9PCS8	MTA3	Evidence at protein level	GO:0003677; GO:0003682; GO:0005634		SUBCELLULAR LOCATION: Nucleus {ECO:0000256|SAAS:SAAS00548613}.
E9PD53	SMC4	Evidence at protein level	GO:0005524; GO:0005694; GO:0051276; GO:0005737; GO:0005654		SUBCELLULAR LOCATION: Nucleus {ECO:0000256|PIRNR:PIRNR005719}.
E9PEG3	AR	Evidence at protein level	GO:0004882; GO:0005634; GO:0043565; GO:0005496; GO:0006351; GO:0008270		SUBCELLULAR LOCATION: Nucleus {ECO:0000256|SAAS:SAAS00586772}.
E9PEI2	EBF4	Evidence at protein level	GO:0000977; GO:0046872; GO:0007275; GO:0005634; GO:0001228		SUBCELLULAR LOCATION: Nucleus {ECO:0000256|RuleBase:RU004489}.
E9PEY4	DTNB	Evidence at protein level	GO:0005737; GO:0008270		SUBCELLULAR LOCATION: Cytoplasm {ECO:0000256|PIRNR:PIRNR038204}.
E9PFD3	NA	Evidence at protein level	GO:0005654; GO:0043565; GO:0003700; GO:0006351		SUBCELLULAR LOCATION: Nucleus {ECO:0000256|SAAS:SAAS00582275}.
E9PFH2	KDM5D	Predicted	GO:0003677; GO:0005634; GO:0016706; GO:0008270		SUBCELLULAR LOCATION: Nucleus {ECO:0000256|SAAS:SAAS00575847}.
E9PFI5	RPS3A	Evidence at protein level	GO:0030154; GO:0005737; GO:0022627; GO:0005730; GO:0003735; GO:0006412		SUBCELLULAR LOCATION: Cytoplasm {ECO:0000256|HAMAP-Rule:MF_03122}. Nucleus {ECO:0000256|HAMAP-Rule:MF_03122}. Note=Localized in cytoplasmic mRNP granules containing untranslated mRNAs. {ECO:0000256|HAMAP-Rule:MF_03122}.
E9PFT5	TP53	Evidence at protein level	GO:0006915; GO:0007049; GO:0005737; GO:0046872; GO:0005634; GO:0003700; GO:0044212; GO:0006351		SUBCELLULAR LOCATION: Cytoplasm {ECO:0000256|RuleBase:RU003304}. Nucleus {ECO:0000256|RuleBase:RU003304}.
E9PFV2	PPARG	Evidence at protein level	GO:0005794; GO:0004879; GO:0043231; GO:0005634; GO:0043565; GO:0003707; GO:0006351; GO:0008270		SUBCELLULAR LOCATION: Nucleus {ECO:0000256|SAAS:SAAS00595767}.
E9PFX5	PPARG	Evidence at protein level	GO:0005794; GO:0004879; GO:0005634; GO:0043565; GO:0043401; GO:0006351; GO:0008270		SUBCELLULAR LOCATION: Nucleus {ECO:0000256|SAAS:SAAS00586772}.
E9PGG2	ANHX	Evidence at transcript level	GO:0005634; GO:0006355; GO:0043565		SUBCELLULAR LOCATION: Nucleus {ECO:0000255|PROSITE-ProRule:PRU00108}.
E9PHA6	MSH2	Evidence at protein level	GO:0005524; GO:0006298; GO:0032300; GO:0030983		SUBCELLULAR LOCATION: Nucleus {ECO:0000256|PIRNR:PIRNR005813}.
E9PI02	HSF1	Evidence at protein level	GO:0005634; GO:0009408; GO:0043565; GO:0003700; GO:0006351		SUBCELLULAR LOCATION: Nucleus {ECO:0000256|SAAS:SAAS00535900}.
E9PI99	NFYC	Evidence at protein level	GO:0016602; GO:0003700		SUBCELLULAR LOCATION: Nucleus {ECO:0000256|SAAS:SAAS00572571}.
E9PID2	NR1H3	Evidence at protein level	GO:0005634; GO:0043565; GO:0003707; GO:0003700; GO:0006351; GO:0008270		SUBCELLULAR LOCATION: Nucleus {ECO:0000256|SAAS:SAAS00595767}.
E9PJI1	KAT5	Evidence at protein level	GO:0004402; GO:0005634; GO:0006355		SUBCELLULAR LOCATION: Nucleus {ECO:0000256|RuleBase:RU361211}.
E9PK92	NA	Evidence at protein level	GO:0003677; GO:0005634		SUBCELLULAR LOCATION: Nucleus {ECO:0000256|RuleBase:RU000682}.
E9PKM0	PAX6	Predicted	GO:0003677; GO:0007275; GO:0005634; GO:0006355; GO:0006351		SUBCELLULAR LOCATION: Nucleus {ECO:0000256|RuleBase:RU000491, ECO:0000256|SAAS:SAAS00117811}.
E9PKT9	MOCS2	Evidence at protein level	GO:0006777; GO:0005829; GO:0030366; GO:0019008; GO:0000166		SUBCELLULAR LOCATION: Cytoplasm, cytosol {ECO:0000256|HAMAP-Rule:MF_03051}.
E9PL17	CLP1	Evidence at protein level	GO:0005524; GO:0046404; GO:0051736; GO:0005737; GO:0031124; GO:0005849; GO:0005654; GO:0035087; GO:0006388; GO:0000214		SUBCELLULAR LOCATION: Nucleus {ECO:0000256|HAMAP-Rule:MF_03035, ECO:0000256|SAAS:SAAS00533943}.
E9PLB7	NA	Evidence at protein level	GO:0003677; GO:0005634		SUBCELLULAR LOCATION: Nucleus {ECO:0000256|RuleBase:RU000682}.
E9PLC2	NA	Evidence at protein level	GO:0003677; GO:0005634		SUBCELLULAR LOCATION: Nucleus {ECO:0000256|RuleBase:RU000682}.
E9PLL4	NR1H3	Evidence at protein level	GO:0005634; GO:0043565; GO:0003707; GO:0003700; GO:0006351; GO:0008270		SUBCELLULAR LOCATION: Nucleus {ECO:0000256|SAAS:SAAS00595767}.
E9PMQ6	HSF1	Evidence at protein level	GO:0005634; GO:0009408; GO:0043565; GO:0003700; GO:0006351		SUBCELLULAR LOCATION: Nucleus {ECO:0000256|SAAS:SAAS00535900}.
E9PNC5	NA	Evidence at protein level	GO:0003677; GO:0005634		SUBCELLULAR LOCATION: Nucleus {ECO:0000256|RuleBase:RU000682}.
E9PNC7	DRAP1	Evidence at protein level	GO:0005634		SUBCELLULAR LOCATION: Nucleus {ECO:0000256|SAAS:SAAS00572571}.
E9PPA1	NR1H3	Evidence at protein level	GO:0005634; GO:0006355; GO:0043401; GO:0006351		SUBCELLULAR LOCATION: Nucleus {ECO:0000256|SAAS:SAAS00595767}.
E9PPR8	NA	Evidence at protein level	GO:0003677; GO:0005634		SUBCELLULAR LOCATION: Nucleus {ECO:0000256|RuleBase:RU000682}.
E9PQE5	RCOR3	Evidence at protein level	GO:0003677; GO:0005634		SUBCELLULAR LOCATION: Nucleus {ECO:0000256|SAAS:SAAS00548613}.
E9PQL7	ZSCAN9	Evidence at protein level	GO:0046872; GO:0003676; GO:0005634; GO:0003700		SUBCELLULAR LOCATION: Nucleus {ECO:0000256|SAAS:SAAS00574784}.
E9PQX9	DRAP1	Evidence at protein level	GO:0005634		SUBCELLULAR LOCATION: Nucleus {ECO:0000256|SAAS:SAAS00572571}.
E9PRF4	SETDB1	Evidence at protein level	GO:0003677; GO:0005737; GO:0018024; GO:0043231; GO:0005654; GO:0005634; GO:0005886; GO:0008270		SUBCELLULAR LOCATION: Nucleus {ECO:0000256|RuleBase:RU004542}.
E9PSA2	NA	Evidence at protein level	GO:0003677; GO:0005634		SUBCELLULAR LOCATION: Nucleus {ECO:0000256|RuleBase:RU000682}.
F1D8N1	NR1H3	Evidence at transcript level	GO:0005634; GO:0043565; GO:0003707; GO:0003700; GO:0006351; GO:0008270		SUBCELLULAR LOCATION: Nucleus {ECO:0000256|SAAS:SAAS00595767}.
F1D8N3	NR3A2	Evidence at transcript level	GO:0030284; GO:0030520; GO:0005634; GO:0043565; GO:0005496; GO:0003700; GO:0006351; GO:0008270		SUBCELLULAR LOCATION: Nucleus {ECO:0000256|PIRNR:PIRNR002527, ECO:0000256|SAAS:SAAS00595767}.
F1D8N4	NR3C1	Evidence at transcript level	GO:0005737; GO:0004883; GO:0005654; GO:0043565; GO:0005496; GO:0003700; GO:0006351; GO:0008270		SUBCELLULAR LOCATION: Nucleus {ECO:0000256|SAAS:SAAS00595767}.
F1D8N5	NR3C4	Evidence at transcript level	GO:0005634; GO:0043565; GO:0003707; GO:0003700; GO:0006351; GO:0008270		SUBCELLULAR LOCATION: Nucleus {ECO:0000256|SAAS:SAAS00595767}.
F1D8N6	NR4A2	Evidence at transcript level	GO:0000979; GO:0004879; GO:0008344; GO:0071376; GO:0031668; GO:0034599; GO:0021952; GO:0005737; GO:0042416; GO:0071542; GO:0045444; GO:0051866; GO:0021986; GO:0043524; GO:0042551; GO:0001764; GO:0005654; GO:0043085; GO:0009791; GO:0042053; GO:0043576; GO:0001975; GO:0001666; GO:0003707; GO:0001077; GO:0008270		SUBCELLULAR LOCATION: Nucleus {ECO:0000256|SAAS:SAAS00595767}.
F1D8N7	NR1A2	Evidence at transcript level	GO:0060509; GO:0031490; GO:0008050; GO:0007621; GO:0000122; GO:0000790; GO:0005634; GO:0009887; GO:0045944; GO:0008016; GO:0007605; GO:0043565; GO:0003707; GO:0004887; GO:0006351; GO:0008270		SUBCELLULAR LOCATION: Nucleus {ECO:0000256|SAAS:SAAS00595767}.
F1D8N9	NR1B1	Evidence at transcript level	GO:0015629; GO:0005737; GO:0005634; GO:0003708; GO:0043565; GO:0003707; GO:0006351; GO:0008270		SUBCELLULAR LOCATION: Nucleus {ECO:0000256|SAAS:SAAS00595767}.
F1D8P1	NR1B3	Evidence at transcript level	GO:0005634; GO:0003708; GO:0043565; GO:0003707; GO:0006351; GO:0008270		SUBCELLULAR LOCATION: Nucleus {ECO:0000256|SAAS:SAAS00595767}.
F1D8P2	NR1D2	Evidence at transcript level	GO:0001046; GO:0055088; GO:0045892; GO:0005634; GO:0045893; GO:0042752; GO:2000505; GO:0050727; GO:0019216; GO:2001014; GO:0003707; GO:0003700; GO:0006351; GO:0008270		SUBCELLULAR LOCATION: Nucleus {ECO:0000256|SAAS:SAAS00595767}.
F1D8P4	NR0B1	Evidence at transcript level	GO:0003677; GO:0033327; GO:0003723; GO:0060008; GO:0030325; GO:0030238; GO:0045596; GO:0000122; GO:0005654; GO:0042788; GO:0035902; GO:0007283; GO:0003707; GO:0003714; GO:0006351		SUBCELLULAR LOCATION: Nucleus {ECO:0000256|SAAS:SAAS00595767}.
F1D8P6	NR1F3	Evidence at transcript level	GO:0004879; GO:0043231; GO:0005730; GO:0043565; GO:0003707; GO:0006351; GO:0008270		SUBCELLULAR LOCATION: Nucleus {ECO:0000256|SAAS:SAAS00595767}.
F1D8P7	NR1H2	Evidence at transcript level	GO:0005634; GO:0043565; GO:0003707; GO:0003700; GO:0006351; GO:0008270		SUBCELLULAR LOCATION: Nucleus {ECO:0000256|SAAS:SAAS00595767}.
F1D8P8	NR1i1	Evidence at transcript level	GO:0008434; GO:0005654; GO:0043565; GO:0003707; GO:0006351; GO:0008270		SUBCELLULAR LOCATION: Nucleus {ECO:0000256|SAAS:SAAS00595767}.
F1D8P9	NR1i2	Evidence at transcript level	GO:0004879; GO:0005634; GO:0010628; GO:0043565; GO:0003707; GO:0006351; GO:0008270		SUBCELLULAR LOCATION: Nucleus {ECO:0000256|SAAS:SAAS00595767}.
F1D8Q4	NR2A2	Evidence at transcript level	GO:0004879; GO:0005634; GO:0043565; GO:0003707; GO:0006351; GO:0008270		SUBCELLULAR LOCATION: Nucleus {ECO:0000256|SAAS:SAAS00595767}.
F1D8Q5	NR2B1	Evidence at transcript level	GO:0004886; GO:0090575; GO:0007568; GO:0030424; GO:0031103; GO:0043010; GO:0060038; GO:0032869; GO:0031490; GO:0003690; GO:0007566; GO:0001701; GO:0006954; GO:0001889; GO:0001893; GO:0007494; GO:0008285; GO:0000122; GO:0043065; GO:1901522; GO:0045994; GO:0060687; GO:0031641; GO:0045471; GO:0051384; GO:0032526; GO:0010269; GO:0033189; GO:0033280; GO:0060528; GO:0043565; GO:0003707; GO:0044212; GO:…		SUBCELLULAR LOCATION: Nucleus {ECO:0000256|SAAS:SAAS00595767}.
F1D8Q7	NR2B3	Evidence at transcript level	GO:0004886; GO:0000977; GO:0005634; GO:1901522; GO:0051289; GO:0003707; GO:0006351; GO:0008270		SUBCELLULAR LOCATION: Nucleus {ECO:0000256|SAAS:SAAS00595767}.
F1D8Q9	NR2E3	Evidence at transcript level	GO:0005634; GO:0043565; GO:0003707; GO:0003700; GO:0006351; GO:0008270		SUBCELLULAR LOCATION: Nucleus {ECO:0000256|SAAS:SAAS00595767}.
F1D8R0	NR2F2	Evidence at transcript level	GO:0004879; GO:0009952; GO:0048514; GO:0009566; GO:0030900; GO:0060173; GO:0001945; GO:0001893; GO:0000122; GO:0001764; GO:0005634; GO:0060674; GO:0009956; GO:0032355; GO:0043565; GO:0007519; GO:0003707; GO:0006351; GO:0060707; GO:0008270		SUBCELLULAR LOCATION: Nucleus {ECO:0000256|SAAS:SAAS00595767}.
F1D8R3	NR2F6	Evidence at transcript level	GO:0000980; GO:0004879; GO:0050965; GO:0043153; GO:0048666; GO:0005634; GO:0003707; GO:0006351; GO:0001227; GO:0008270		SUBCELLULAR LOCATION: Nucleus {ECO:0000256|SAAS:SAAS00595767}.
F1D8R5	NR3B3	Evidence at transcript level	GO:0005634; GO:0003708; GO:0043565; GO:0005496; GO:0003707; GO:0006351; GO:0008270		SUBCELLULAR LOCATION: Nucleus {ECO:0000256|PIRNR:PIRNR002527, ECO:0000256|SAAS:SAAS00595767}.
F1D8R6	NR3B3	Evidence at transcript level	GO:0005634; GO:0003708; GO:0043565; GO:0005496; GO:0003707; GO:0006351; GO:0008270		SUBCELLULAR LOCATION: Nucleus {ECO:0000256|PIRNR:PIRNR002527, ECO:0000256|SAAS:SAAS00595767}.
F1D8R8	NR5A1	Evidence at transcript level	GO:0000980; GO:0090575; GO:0030325; GO:0030154; GO:0003682; GO:0042445; GO:0001553; GO:0051457; GO:0008584; GO:0010259; GO:2000195; GO:2000020; GO:0045944; GO:0003707; GO:0009888; GO:0003700; GO:0006366; GO:0008270		SUBCELLULAR LOCATION: Nucleus {ECO:0000256|SAAS:SAAS00595767}.
F1D8R9	NR5A2	Evidence at transcript level	GO:0005634; GO:0043565; GO:0003707; GO:0003700; GO:0006351; GO:0008270		SUBCELLULAR LOCATION: Nucleus {ECO:0000256|SAAS:SAAS00595767}.
F1D8S0	NR6A1	Evidence at transcript level	GO:0000978; GO:0007276; GO:0000122; GO:0005634; GO:0003707; GO:0005667; GO:0001077; GO:0008270		SUBCELLULAR LOCATION: Nucleus {ECO:0000256|SAAS:SAAS00595767}.
F1D8S2	NR2A1	Evidence at transcript level	GO:0004879; GO:0005634; GO:0043565; GO:0003707; GO:0006351; GO:0008270		SUBCELLULAR LOCATION: Nucleus {ECO:0000256|SAAS:SAAS00595767}.
F1D8S3	NR1D1	Evidence at transcript level	GO:0032922; GO:0060086; GO:0001046; GO:0005737; GO:0043197; GO:0005978; GO:0045892; GO:0005634; GO:0070859; GO:0045893; GO:0010498; GO:2000188; GO:0042752; GO:0045598; GO:0061178; GO:0061469; GO:0044321; GO:0003707; GO:0003700; GO:0006351; GO:0008270		SUBCELLULAR LOCATION: Nucleus {ECO:0000256|SAAS:SAAS00595767}.
F1D8S4	NR1C1	Evidence at transcript level	GO:0004879; GO:0035095; GO:0032922; GO:0070166; GO:0008544; GO:0006631; GO:0007507; GO:0008289; GO:0042157; GO:0032099; GO:0045776; GO:1901215; GO:0032091; GO:2000678; GO:0005634; GO:0046321; GO:0045722; GO:0042752; GO:0001666; GO:0032868; GO:0043565; GO:0003707; GO:0001190; GO:0042060; GO:0008270		SUBCELLULAR LOCATION: Nucleus {ECO:0000256|SAAS:SAAS00595767}.
F1D8S6	NR1B2	Evidence at transcript level	GO:0000977; GO:0008144; GO:0048048; GO:0035116; GO:0002068; GO:0003417; GO:0035264; GO:0043066; GO:0008285; GO:0032331; GO:0000122; GO:0005654; GO:0003148; GO:0043065; GO:0008284; GO:0045666; GO:0045944; GO:0031641; GO:0003406; GO:0003708; GO:0003707; GO:0021756; GO:0006351; GO:0001657; GO:0055012; GO:0008270		SUBCELLULAR LOCATION: Nucleus {ECO:0000256|SAAS:SAAS00595767}.
F1D8S7	NR1C2	Evidence at transcript level	GO:0004879; GO:0005634; GO:0043565; GO:0003707; GO:0006351; GO:0008270		SUBCELLULAR LOCATION: Nucleus {ECO:0000256|SAAS:SAAS00595767}.
F1D8T0	NR2A1	Evidence at transcript level	GO:0004879; GO:0005634; GO:0043565; GO:0003707; GO:0006351; GO:0008270		SUBCELLULAR LOCATION: Nucleus {ECO:0000256|SAAS:SAAS00595767}.
F1D8T1	NR2A1	Evidence at transcript level	GO:0000979; GO:0004879; GO:0060395; GO:0006637; GO:0030154; GO:0045216; GO:0005737; GO:0007164; GO:0005504; GO:0000062; GO:0042593; GO:0006629; GO:1902569; GO:0008285; GO:0045930; GO:0033159; GO:0043433; GO:0042524; GO:0005634; GO:0016290; GO:0055091; GO:2000189; GO:0045723; GO:0045722; GO:0010470; GO:0050796; GO:0032534; GO:0051591; GO:0042493; GO:0009749; GO:0007548; GO:0023019; GO:0003707; GO:…		SUBCELLULAR LOCATION: Nucleus {ECO:0000256|SAAS:SAAS00595767}.
F1DAL0	NR1F1	Evidence at transcript level	GO:0004879; GO:0005634; GO:0043565; GO:0003707; GO:0006351; GO:0008270		SUBCELLULAR LOCATION: Nucleus {ECO:0000256|SAAS:SAAS00595767}.
F1DAL1	NR1H4	Evidence at transcript level	GO:0005634; GO:0043565; GO:0003707; GO:0004887; GO:0006351; GO:0008270		SUBCELLULAR LOCATION: Nucleus {ECO:0000256|SAAS:SAAS00595767}.
F1DAL2	NR4A2	Evidence at transcript level	GO:0004879; GO:0005634; GO:0043565; GO:0003707; GO:0006351; GO:0008270		SUBCELLULAR LOCATION: Nucleus {ECO:0000256|SAAS:SAAS00595767}.
F1DAL3	NR1I2	Evidence at transcript level	GO:0005634; GO:0043565; GO:0003707; GO:0003700; GO:0006351; GO:0008270		SUBCELLULAR LOCATION: Nucleus {ECO:0000256|SAAS:SAAS00595767}.
F1DAL4	NR1I3	Evidence at transcript level	GO:0005654; GO:0043565; GO:0003707; GO:0003700; GO:0006351; GO:0008270		SUBCELLULAR LOCATION: Nucleus {ECO:0000256|SAAS:SAAS00595767}.
F1DAL6	NR2F1	Evidence at transcript level	GO:0004879; GO:0005634; GO:0043565; GO:0003707; GO:0006351; GO:0008270		SUBCELLULAR LOCATION: Nucleus {ECO:0000256|SAAS:SAAS00595767}.
F1DAL7	NR2F1	Evidence at transcript level	GO:0004879; GO:0005634; GO:0043565; GO:0003707; GO:0006351; GO:0008270		SUBCELLULAR LOCATION: Nucleus {ECO:0000256|SAAS:SAAS00595767}.
F1DAL8	NR2F1	Evidence at transcript level	GO:0004879; GO:0005634; GO:0043565; GO:0003707; GO:0006351; GO:0008270		SUBCELLULAR LOCATION: Nucleus {ECO:0000256|SAAS:SAAS00595767}.
F1DAL9	NR2F1	Evidence at protein level	GO:0004879; GO:0005634; GO:0043565; GO:0003707; GO:0006351; GO:0008270		SUBCELLULAR LOCATION: Nucleus {ECO:0000256|SAAS:SAAS00595767}.
F1DAM0	NR5A1	Evidence at protein level	GO:0005634; GO:0043565; GO:0003707; GO:0003700; GO:0006351; GO:0008270		SUBCELLULAR LOCATION: Nucleus {ECO:0000256|SAAS:SAAS00595767}.
F1DAM1	NR6A1	Evidence at transcript level	GO:0005634; GO:0043565; GO:0003707; GO:0003700; GO:0006351; GO:0008270		SUBCELLULAR LOCATION: Nucleus {ECO:0000256|SAAS:SAAS00595767}.
F1JVV7	EWSR1/FLI1	Evidence at transcript level	GO:0005634; GO:0043565; GO:0003700		SUBCELLULAR LOCATION: Nucleus {ECO:0000256|SAAS:SAAS00594387}.
F1JVV8	EWSR1/FLI1	Evidence at transcript level	GO:0005634; GO:0043565; GO:0003700		SUBCELLULAR LOCATION: Nucleus {ECO:0000256|SAAS:SAAS00594387}.
F1T0D0	OTX2	Evidence at transcript level	GO:0007275; GO:0005634; GO:0043565; GO:0003700		SUBCELLULAR LOCATION: Nucleus {ECO:0000256|RuleBase:RU000682}.
F1T0D1	OTX2	Evidence at transcript level	GO:0007275; GO:0005634; GO:0043565; GO:0003700		SUBCELLULAR LOCATION: Nucleus {ECO:0000256|RuleBase:RU000682}.
F1T0D5	LHX3	Evidence at transcript level	GO:0005634; GO:0006355; GO:0043565; GO:0008270		SUBCELLULAR LOCATION: Nucleus {ECO:0000256|RuleBase:RU000682, ECO:0000256|SAAS:SAAS00397436}.
F1T0D7	LHX3	Evidence at transcript level	GO:0005634; GO:0006355; GO:0043565; GO:0008270		SUBCELLULAR LOCATION: Nucleus {ECO:0000256|RuleBase:RU000682, ECO:0000256|SAAS:SAAS00397436}.
F1T0D9	LHX3	Evidence at transcript level	GO:0030324; GO:0021526; GO:0008045; GO:0043066; GO:0005634; GO:0021983; GO:0001890; GO:0045944; GO:0043565; GO:0021527; GO:0021520; GO:0001076; GO:0005667; GO:0021521; GO:0008270		SUBCELLULAR LOCATION: Nucleus {ECO:0000256|RuleBase:RU000682, ECO:0000256|SAAS:SAAS00397436}.
F1T0F8	PAX6	Evidence at transcript level	GO:0000978; GO:0000979; GO:0048708; GO:0007411; GO:0001709; GO:0021796; GO:0003682; GO:0021902; GO:0005737; GO:0009950; GO:0048596; GO:0000132; GO:0042462; GO:0021797; GO:0021798; GO:0021905; GO:0030216; GO:0032808; GO:0002088; GO:0050680; GO:2000178; GO:0045665; GO:0001933; GO:0001764; GO:0000790; GO:0005654; GO:0021778; GO:0003322; GO:0021983; GO:0030858; GO:0002052; GO:0033365; GO:0009786; GO:…		SUBCELLULAR LOCATION: Nucleus {ECO:0000256|RuleBase:RU000491, ECO:0000256|SAAS:SAAS00117811}.
F1T0J8	RCOR2	Evidence at transcript level	GO:0003677; GO:0005634		SUBCELLULAR LOCATION: Nucleus {ECO:0000256|SAAS:SAAS00548613}.
F1T0K5	VAX2	Evidence at transcript level	GO:0001162; GO:0007409; GO:0031490; GO:0005737; GO:0009950; GO:0048048; GO:0030900; GO:0005634; GO:0060041; GO:0001227; GO:0007601		SUBCELLULAR LOCATION: Nucleus {ECO:0000256|RuleBase:RU000682, ECO:0000256|SAAS:SAAS00544279}.
F2YGU2	NR2C2	Evidence at transcript level	GO:0021549; GO:0051321; GO:0005654; GO:0038066; GO:0048520; GO:0040019; GO:0045663; GO:0043565; GO:0007283; GO:0003707; GO:0003700; GO:0006351; GO:0008270		SUBCELLULAR LOCATION: Nucleus {ECO:0000256|SAAS:SAAS00595767}.
F2Z2B9	TUBGCP2	Evidence at protein level	GO:0005737; GO:0005874; GO:0007020; GO:0005815; GO:0000922		SUBCELLULAR LOCATION: Cytoplasm, cytoskeleton, microtubule organizing center {ECO:0000256|RuleBase:RU363050}.
F2Z2R5	CHD5	Evidence at protein level	GO:0005524; GO:0008026; GO:0003677; GO:0005634; GO:0006355; GO:0008270		SUBCELLULAR LOCATION: Nucleus {ECO:0000256|SAAS:SAAS00539527}.
F2Z381	POU5F1	Evidence at protein level	GO:0005634; GO:0043565; GO:0003700		SUBCELLULAR LOCATION: Nucleus {ECO:0000256|RuleBase:RU000682, ECO:0000256|SAAS:SAAS00553137}.
F5ATB8	NR3C1	Evidence at transcript level	GO:0004883; GO:0005634; GO:0043565; GO:0005496; GO:0003700; GO:0006351; GO:0008270		SUBCELLULAR LOCATION: Nucleus {ECO:0000256|SAAS:SAAS00595767}.
F5GWF6	CCT2	Evidence at protein level	GO:0005524; GO:0005737; GO:0006457		SUBCELLULAR LOCATION: Cytoplasm {ECO:0000256|SAAS:SAAS00547836}.
F5GWT5	ESRRA	Evidence at protein level	GO:0045171; GO:0015630; GO:0005730; GO:0005634; GO:0043565; GO:0003700; GO:0006351; GO:0008270		SUBCELLULAR LOCATION: Nucleus {ECO:0000256|SAAS:SAAS00586772}.
F5GWX5	CHD4	Evidence at protein level	GO:0005524; GO:0008026; GO:0003677; GO:0016581; GO:0006325; GO:0005634; GO:0006355; GO:0051225; GO:0008270		SUBCELLULAR LOCATION: Nucleus {ECO:0000256|SAAS:SAAS00539527}.
F5GX28	KDM4B	Evidence at protein level	GO:0005634; GO:0008270		SUBCELLULAR LOCATION: Nucleus {ECO:0000256|SAAS:SAAS00575847}.
F5GXF0	NR4A1	Evidence at protein level	GO:0004879; GO:0071376; GO:0005737; GO:0045444; GO:0045786; GO:0043154; GO:0031965; GO:0005634; GO:0043065; GO:0061469; GO:0043565; GO:0035914; GO:0003707; GO:0005667; GO:0001077; GO:0008270		SUBCELLULAR LOCATION: Nucleus {ECO:0000256|SAAS:SAAS00595767}.
F5GY34	PSMA8	Predicted	GO:0004175; GO:0005634; GO:0019773; GO:0006511		SUBCELLULAR LOCATION: Nucleus {ECO:0000256|SAAS:SAAS00594407}.
F5GYS8	MEIS1	Evidence at protein level	GO:0003677; GO:0005634; GO:0006355		SUBCELLULAR LOCATION: Nucleus {ECO:0000256|SAAS:SAAS00563020}.
F5GZG9	AR	Evidence at protein level	GO:0004882; GO:0005634; GO:0043565; GO:0005496; GO:0006351; GO:0008270		SUBCELLULAR LOCATION: Nucleus {ECO:0000256|SAAS:SAAS00595767}.
F5GZI2	NANOG	Predicted	GO:0005634; GO:0006355; GO:0043565		SUBCELLULAR LOCATION: Nucleus {ECO:0000256|RuleBase:RU000682}.
F5H018	RAN	Evidence at protein level	GO:0005525; GO:0003924; GO:0006886; GO:0006913; GO:0005634; GO:0007264		SUBCELLULAR LOCATION: Nucleus {ECO:0000256|RuleBase:RU363057}.
F5H0E9	ESRRA	Evidence at protein level	GO:0003677; GO:0005634; GO:0006355; GO:0003707; GO:0006351		SUBCELLULAR LOCATION: Nucleus {ECO:0000256|SAAS:SAAS00595767}.
F5H0K0	HNF1A	Evidence at protein level	GO:0000979; GO:0060395; GO:0015721; GO:0006699; GO:0001824; GO:0045453; GO:0008203; GO:0006338; GO:0005737; GO:0030326; GO:0031018; GO:0006633; GO:0015908; GO:0042593; GO:0046323; GO:0006783; GO:0016573; GO:0030073; GO:0001889; GO:0000122; GO:0005654; GO:0048341; GO:0001750; GO:0001890; GO:0045120; GO:0030111; GO:0050796; GO:0035623; GO:0009749; GO:0006979; GO:0043691; GO:0005667; GO:0001077		SUBCELLULAR LOCATION: Nucleus {ECO:0000256|RuleBase:RU000682}.
F5H1F7	NA	Evidence at protein level	GO:0003677; GO:0005634; GO:0016706; GO:0008270		SUBCELLULAR LOCATION: Nucleus {ECO:0000256|SAAS:SAAS00575847}.
F5H282	TCP1	Evidence at protein level	GO:0005524; GO:0005737		SUBCELLULAR LOCATION: Cytoplasm {ECO:0000256|SAAS:SAAS00547836}.
F5H284	PPIAL4D	Inferred from homology	GO:0005737; GO:0003755; GO:0006457		SUBCELLULAR LOCATION: Cytoplasm {ECO:0000250|UniProtKB:P62937}.
F5H2X7	CIZ1	Evidence at protein level	GO:0051457; GO:0003676; GO:0005634; GO:0032298; GO:0008270		SUBCELLULAR LOCATION: Nucleus {ECO:0000256|SAAS:SAAS00591741}.
F5H5D3	TUBA1C	Evidence at protein level	GO:0005525; GO:0003924; GO:0005881; GO:0007017; GO:0005200		SUBCELLULAR LOCATION: Cytoplasm, cytoskeleton {ECO:0000256|SAAS:SAAS00392180}.
F6T8T6	NA	Predicted	GO:0003677; GO:0009792; GO:0005634; GO:0048477		SUBCELLULAR LOCATION: Nucleus {ECO:0000256|RuleBase:RU000682}.
F6WH68	NA	Inferred from homology	GO:0051539; GO:0005524; GO:0004003; GO:0003677; GO:0006310; GO:0006281; GO:0006260; GO:0046872; GO:0005634; GO:0010569; GO:0000723		SUBCELLULAR LOCATION: Nucleus {ECO:0000256|HAMAP-Rule:MF_03065}. Note=Colocalizes with PCNA within the replication foci in S-phase cells. {ECO:0000256|HAMAP-Rule:MF_03065}.
F6WIT2	PTPA	Evidence at protein level	GO:0005737; GO:0003755; GO:0019211		SUBCELLULAR LOCATION: Cytoplasm {ECO:0000256|RuleBase:RU361210}.
F8QWT8	DUX4	Predicted	GO:0003677; GO:0005634		SUBCELLULAR LOCATION: Nucleus {ECO:0000256|RuleBase:RU000682}.
F8QWU0	DUX4	Predicted	GO:0003677; GO:0005634		SUBCELLULAR LOCATION: Nucleus {ECO:0000256|RuleBase:RU000682}.
F8QWU1	DUX4	Predicted	GO:0003677; GO:0005634		SUBCELLULAR LOCATION: Nucleus {ECO:0000256|RuleBase:RU000682}.
F8QWU2	DUX4	Predicted	GO:0003677; GO:0005634		SUBCELLULAR LOCATION: Nucleus {ECO:0000256|RuleBase:RU000682}.
F8TAD1	NA	Evidence at transcript level	GO:0005634; GO:0043565; GO:0003700		SUBCELLULAR LOCATION: Nucleus {ECO:0000256|RuleBase:RU000682}.
F8VNY3	CBX5	Evidence at protein level	GO:0005634		SUBCELLULAR LOCATION: Nucleus {ECO:0000256|SAAS:SAAS00539054}.
F8VPF8	VDR	Evidence at protein level	GO:0008434; GO:0005634; GO:0043565; GO:0006351; GO:0008270		SUBCELLULAR LOCATION: Nucleus {ECO:0000256|SAAS:SAAS00586772}.
F8VQ14	CCT2	Evidence at protein level	GO:0005524; GO:0005737; GO:0006457		SUBCELLULAR LOCATION: Cytoplasm {ECO:0000256|SAAS:SAAS00547836}.
F8VR32	NPAS3	Evidence at protein level	GO:0005737; GO:0005654; GO:0006355; GO:0006351		SUBCELLULAR LOCATION: Nucleus {ECO:0000256|SAAS:SAAS00600858}.
F8VRJ4	VDR	Evidence at protein level	GO:0008434; GO:0005654; GO:0043565; GO:0043401; GO:0006351; GO:0008270		SUBCELLULAR LOCATION: Nucleus {ECO:0000256|SAAS:SAAS00595767}.
F8VS42	NPAS3	Evidence at protein level	GO:0005737; GO:0005654; GO:0006355; GO:0006351		SUBCELLULAR LOCATION: Nucleus {ECO:0000256|SAAS:SAAS00600858}.
F8VSE7	E2F7	Evidence at protein level	GO:0003677; GO:0005634; GO:0003700; GO:0005667; GO:0006351		SUBCELLULAR LOCATION: Nucleus {ECO:0000256|RuleBase:RU003796}.
F8VSL3	NFYB	Evidence at protein level	GO:0005634; GO:0006355; GO:0043565		SUBCELLULAR LOCATION: Nucleus {ECO:0000256|SAAS:SAAS00572571}.
F8VU08	HHEX	Evidence at protein level	GO:0003677; GO:0005634		SUBCELLULAR LOCATION: Nucleus {ECO:0000256|RuleBase:RU000682}.
F8VUJ0	ELK3	Evidence at protein level	GO:0005634; GO:0043565; GO:0003700		SUBCELLULAR LOCATION: Nucleus {ECO:0000256|SAAS:SAAS00594387}.
F8VUY0	TGIF1	Evidence at protein level	GO:0003677; GO:0005634; GO:0006355		SUBCELLULAR LOCATION: Nucleus {ECO:0000256|SAAS:SAAS00563020}.
F8VVS9	TGIF1	Evidence at protein level	GO:0003677; GO:0005634; GO:0006355		SUBCELLULAR LOCATION: Nucleus {ECO:0000256|SAAS:SAAS00563020}.
F8VVY8	VDR	Evidence at protein level	GO:0008434; GO:0005634; GO:0043565; GO:0006351; GO:0008270		SUBCELLULAR LOCATION: Nucleus {ECO:0000256|SAAS:SAAS00586772}.
F8VW34	TGIF1	Evidence at protein level	GO:0003677; GO:0005634; GO:0006355		SUBCELLULAR LOCATION: Nucleus {ECO:0000256|SAAS:SAAS00563020}.
F8VWK5	TGIF1	Evidence at protein level	GO:0003677; GO:0005634; GO:0006355		SUBCELLULAR LOCATION: Nucleus {ECO:0000256|SAAS:SAAS00563020}.
F8VWZ5	HLX	Predicted	GO:0005634; GO:0006355; GO:0043565		SUBCELLULAR LOCATION: Nucleus {ECO:0000256|RuleBase:RU000682, ECO:0000256|SAAS:SAAS00544279}.
F8VWZ9	NKX6-1	Evidence at protein level	GO:0003677; GO:0005634		SUBCELLULAR LOCATION: Nucleus {ECO:0000256|RuleBase:RU000682}.
F8VX54	TGIF1	Evidence at protein level	GO:0003677; GO:0005634; GO:0006355		SUBCELLULAR LOCATION: Nucleus {ECO:0000256|SAAS:SAAS00563020}.
F8VXC8	SMARCC2	Evidence at protein level	GO:0090544; GO:0003677; GO:0006338; GO:0005654; GO:0006357		SUBCELLULAR LOCATION: Nucleus {ECO:0000256|SAAS:SAAS00548613}.
F8VXG0	HOXB3	Evidence at protein level	GO:0005634; GO:0006355; GO:0043565		SUBCELLULAR LOCATION: Nucleus {ECO:0000256|RuleBase:RU000682, ECO:0000256|SAAS:SAAS00544279}.
F8VXG1	DLX3	Predicted	GO:0005634; GO:0006355; GO:0043565		SUBCELLULAR LOCATION: Nucleus {ECO:0000256|RuleBase:RU000682, ECO:0000256|SAAS:SAAS00544279}.
F8VXG3	TGIF1	Evidence at protein level	GO:0003677; GO:0005634; GO:0006355		SUBCELLULAR LOCATION: Nucleus {ECO:0000256|SAAS:SAAS00563020}.
F8VXJ2	DLX1	Evidence at protein level	GO:0005634; GO:0006355; GO:0043565		SUBCELLULAR LOCATION: Nucleus {ECO:0000256|RuleBase:RU000682, ECO:0000256|SAAS:SAAS00544279}.
F8VXQ9	VDR	Evidence at protein level	GO:0005634; GO:0043565; GO:0003700; GO:0006351; GO:0008270		SUBCELLULAR LOCATION: Nucleus {ECO:0000256|SAAS:SAAS00586772}.
F8VXY1	CERS5	Evidence at protein level	GO:0003677; GO:0005783; GO:0016021; GO:0005634		SUBCELLULAR LOCATION: Nucleus {ECO:0000256|RuleBase:RU000682}.	TRANSMEM 46 64 Helical. {ECO:0000256|SAM:Phobius}.; TRANSMEM 148 168 Helical. {ECO:0000256|SAM:Phobius}.; TRANSMEM 188 207 Helical. {ECO:0000256|SAM:Phobius}.; TRANSMEM 214 233 Helical. {ECO:0000256|SAM:Phobius}.; TRANSMEM 272 296 Helical. {ECO:0000256|SAM:Phobius}.
F8VYL4	TGIF1	Evidence at protein level	GO:0003677; GO:0005634; GO:0006355		SUBCELLULAR LOCATION: Nucleus {ECO:0000256|SAAS:SAAS00563020}.
F8VZH2	TGIF1	Evidence at protein level	GO:0003677; GO:0005634; GO:0006355		SUBCELLULAR LOCATION: Nucleus {ECO:0000256|SAAS:SAAS00563020}.
F8W1B5	EMX1	Predicted	GO:0003677; GO:0005634		SUBCELLULAR LOCATION: Nucleus {ECO:0000256|RuleBase:RU000682}.
F8W1J9	TGIF1	Evidence at protein level	GO:0003677; GO:0005634; GO:0006355		SUBCELLULAR LOCATION: Nucleus {ECO:0000256|SAAS:SAAS00563020}.
F8W6I3	NR4A2	Evidence at protein level	GO:0004879; GO:0005654; GO:0043565; GO:0003707; GO:0006351; GO:0008270		SUBCELLULAR LOCATION: Nucleus {ECO:0000256|SAAS:SAAS00595767}.
F8W9U4	MAP4	Evidence at protein level	GO:0005737; GO:0005874		SUBCELLULAR LOCATION: Cytoplasm, cytoskeleton {ECO:0000256|RuleBase:RU000686}.
F8WBA3	PRKD1	Evidence at protein level	GO:0005524; GO:0005737; GO:0035556; GO:0046872; GO:0005886; GO:0004697		SUBCELLULAR LOCATION: Cytoplasm {ECO:0000256|PIRNR:PIRNR000552}.
F8WCF6	ARPC4-TTLL3	Inferred from homology	GO:0034314; GO:0005885; GO:0030041; GO:0005737		SUBCELLULAR LOCATION: Cytoplasm, cytoskeleton {ECO:0000256|PIRNR:PIRNR039100}.
F8WCW6	CBX4	Evidence at protein level	GO:0005634		SUBCELLULAR LOCATION: Nucleus {ECO:0000256|SAAS:SAAS00539527}.
F8WD88	CENPA	Evidence at protein level	GO:0003677; GO:0000786; GO:0005634		SUBCELLULAR LOCATION: Chromosome {ECO:0000256|SAAS:SAAS00597685}.; SUBCELLULAR LOCATION: Nucleus {ECO:0000256|SAAS:SAAS00597723}.
F8WEJ7	TAF6	Evidence at protein level	GO:0006352; GO:0005634		SUBCELLULAR LOCATION: Nucleus {ECO:0000256|SAAS:SAAS00570996}.
G0Z067	NA	Inferred from homology	GO:0003677; GO:0030154; GO:0030238; GO:0005634; GO:0007548; GO:0003700; GO:0006351		SUBCELLULAR LOCATION: Nucleus {ECO:0000256|SAAS:SAAS00548902}.
G0Z068	NA	Inferred from homology	GO:0003677; GO:0030154; GO:0030238; GO:0005634; GO:0007548; GO:0003700; GO:0006351		SUBCELLULAR LOCATION: Nucleus {ECO:0000256|SAAS:SAAS00548902}.
G0Z069	NA	Inferred from homology	GO:0003677; GO:0030154; GO:0030238; GO:0005634; GO:0007548; GO:0003700; GO:0006351		SUBCELLULAR LOCATION: Nucleus {ECO:0000256|SAAS:SAAS00548902}.
G0Z070	NA	Inferred from homology	GO:0003677; GO:0030154; GO:0030238; GO:0005634; GO:0007548; GO:0003700; GO:0006351		SUBCELLULAR LOCATION: Nucleus {ECO:0000256|SAAS:SAAS00548902}.
G0Z071	NA	Inferred from homology	GO:0003677; GO:0030154; GO:0030238; GO:0005634; GO:0007548; GO:0003700; GO:0006351		SUBCELLULAR LOCATION: Nucleus {ECO:0000256|SAAS:SAAS00548902}.
G2XKQ0	SUMO1P1	Evidence at transcript level	GO:0005634; GO:0016925; GO:0008134		SUBCELLULAR LOCATION: Nucleus {ECO:0000256|RuleBase:RU361190}.
G3V1B0	OVOL1	Evidence at protein level	GO:0000981; GO:0046872; GO:0003676; GO:0005634; GO:0006366		SUBCELLULAR LOCATION: Nucleus {ECO:0000256|SAAS:SAAS00535819}.
G3V1M0	ZSCAN21	Evidence at protein level	GO:0046872; GO:0003676; GO:0005634; GO:0003700; GO:0006351		SUBCELLULAR LOCATION: Nucleus {ECO:0000256|SAAS:SAAS00574784}.
G3V1Z7	ELK3	Evidence at protein level	GO:0005634; GO:0043565; GO:0003700		SUBCELLULAR LOCATION: Nucleus {ECO:0000256|SAAS:SAAS00594387}.
G3V295	PSMA6	Evidence at protein level	GO:0005737; GO:0005634; GO:0019773; GO:0004298; GO:0006511		SUBCELLULAR LOCATION: Cytoplasm {ECO:0000256|RuleBase:RU000551}. Nucleus {ECO:0000256|RuleBase:RU000551}.; SUBCELLULAR LOCATION: Nucleus {ECO:0000256|SAAS:SAAS00594407}.
G3V2J7	CDKN3	Evidence at protein level	GO:0007049; GO:0005737; GO:0048471; GO:0004725		SUBCELLULAR LOCATION: Cytoplasm, perinuclear region {ECO:0000256|PIRNR:PIRNR037322}.
G3V2N2	SIX4	Evidence at protein level	GO:0005634; GO:0006355; GO:0043565		SUBCELLULAR LOCATION: Nucleus {ECO:0000256|RuleBase:RU000682}.
G3V2N3	PRRX1	Evidence at protein level	GO:0005730; GO:0005634; GO:0006355; GO:0043565		SUBCELLULAR LOCATION: Nucleus {ECO:0000256|RuleBase:RU000682}.
G3V2S7	PSMA6	Evidence at protein level	GO:0004175; GO:0005634; GO:0019773; GO:0006511		SUBCELLULAR LOCATION: Nucleus {ECO:0000256|SAAS:SAAS00594407}.
G3V359	APEX1	Evidence at protein level	GO:0003677; GO:0006281; GO:0003906; GO:0046872; GO:0005739; GO:0005634		SUBCELLULAR LOCATION: Nucleus {ECO:0000256|RuleBase:RU362131}. Cytoplasm {ECO:0000256|RuleBase:RU362131}. Mitochondrion {ECO:0000256|RuleBase:RU362131}.
G3V3C7	APEX1	Evidence at protein level	GO:0003677; GO:0006281; GO:0003906; GO:0046872; GO:0005739; GO:0005634		SUBCELLULAR LOCATION: Nucleus {ECO:0000256|RuleBase:RU362131}. Cytoplasm {ECO:0000256|RuleBase:RU362131}. Mitochondrion {ECO:0000256|RuleBase:RU362131}.
G3V3I1	PSMA6	Evidence at protein level	GO:0005737; GO:0005634; GO:0019773; GO:0004298; GO:0006511		SUBCELLULAR LOCATION: Cytoplasm {ECO:0000256|RuleBase:RU000551}. Nucleus {ECO:0000256|RuleBase:RU000551}.; SUBCELLULAR LOCATION: Nucleus {ECO:0000256|SAAS:SAAS00594407}.
G3V3J3	OTX2	Evidence at protein level	GO:0005634; GO:0006355; GO:0043565		SUBCELLULAR LOCATION: Nucleus {ECO:0000256|RuleBase:RU000682}.
G3V3M6	APEX1	Evidence at protein level	GO:0003677; GO:0006281; GO:0003906; GO:0005813; GO:0046872; GO:0005739; GO:0005634		SUBCELLULAR LOCATION: Nucleus {ECO:0000256|RuleBase:RU362131}. Cytoplasm {ECO:0000256|RuleBase:RU362131}. Mitochondrion {ECO:0000256|RuleBase:RU362131}.
G3V3P9	OTX2	Evidence at protein level	GO:0007275; GO:0005634; GO:0043565; GO:0003700		SUBCELLULAR LOCATION: Nucleus {ECO:0000256|RuleBase:RU000682}.
G3V3U4	PSMA6	Evidence at protein level	GO:0005737; GO:0005634; GO:0019773; GO:0004298; GO:0006511		SUBCELLULAR LOCATION: Cytoplasm {ECO:0000256|RuleBase:RU000551}. Nucleus {ECO:0000256|RuleBase:RU000551}.; SUBCELLULAR LOCATION: Nucleus {ECO:0000256|SAAS:SAAS00594407}.
G3V3W4	PSMA3	Evidence at protein level	GO:0004175; GO:0005634; GO:0019773; GO:0006511		SUBCELLULAR LOCATION: Nucleus {ECO:0000256|SAAS:SAAS00594407}.
G3V471	DLX6	Evidence at protein level	GO:0005634; GO:0006355; GO:0043565		SUBCELLULAR LOCATION: Nucleus {ECO:0000256|RuleBase:RU000682, ECO:0000256|SAAS:SAAS00544279}.
G3V4A5	MED6	Evidence at protein level	GO:0001104; GO:0016592; GO:0005654; GO:0006351		SUBCELLULAR LOCATION: Nucleus {ECO:0000256|PIRNR:PIRNR023869}.
G3V4Q1	NA	Predicted	GO:0007275; GO:0005634; GO:0006355; GO:0043565; GO:0006351		SUBCELLULAR LOCATION: Nucleus {ECO:0000256|RuleBase:RU000491, ECO:0000256|SAAS:SAAS00117811}.
G3V5M0	APEX1	Evidence at protein level	GO:0003677; GO:0006281; GO:0003906; GO:0046872; GO:0005739; GO:0005634		SUBCELLULAR LOCATION: Nucleus {ECO:0000256|RuleBase:RU362131}. Cytoplasm {ECO:0000256|RuleBase:RU362131}. Mitochondrion {ECO:0000256|RuleBase:RU362131}.
G3V5N4	PSMA3	Evidence at protein level	GO:0004175; GO:0005634; GO:0019773; GO:0006511		SUBCELLULAR LOCATION: Nucleus {ECO:0000256|SAAS:SAAS00594407}.
G3V5Q1	APEX1	Evidence at protein level	GO:0003677; GO:0006281; GO:0003906; GO:0005813; GO:0046872; GO:0005739; GO:0005634		SUBCELLULAR LOCATION: Nucleus {ECO:0000256|RuleBase:RU362131}. Cytoplasm {ECO:0000256|RuleBase:RU362131}. Mitochondrion {ECO:0000256|RuleBase:RU362131}.
G3V5S2	ESR2	Evidence at protein level	GO:0030284; GO:0030520; GO:0005634; GO:0043565; GO:0005496; GO:0003700; GO:0006351; GO:0008270		SUBCELLULAR LOCATION: Nucleus {ECO:0000256|PIRNR:PIRNR002527, ECO:0000256|SAAS:SAAS00595767}.
G3V5S4	PAX2	Evidence at protein level	GO:0003677; GO:0005794; GO:0007275; GO:0005730; GO:0006355; GO:0006351	SIGNAL 1 22 {ECO:0000256|SAM:SignalP}.	SUBCELLULAR LOCATION: Nucleus {ECO:0000256|RuleBase:RU000491, ECO:0000256|SAAS:SAAS00117811}.
G3V5Z7	PSMA6	Evidence at protein level	GO:0005737; GO:0005634; GO:0019773; GO:0004298; GO:0006511		SUBCELLULAR LOCATION: Cytoplasm {ECO:0000256|RuleBase:RU000551}. Nucleus {ECO:0000256|RuleBase:RU000551}.; SUBCELLULAR LOCATION: Nucleus {ECO:0000256|SAAS:SAAS00594407}.
G4XH65	ESR1	Evidence at transcript level	GO:0004879; GO:0060009; GO:0060011; GO:0030315; GO:0008209; GO:0001547; GO:1990375; GO:0071391; GO:0003682; GO:0001046; GO:0046697; GO:0060750; GO:0030284; GO:0042562; GO:0030518; GO:0060749; GO:0060745; GO:0005739; GO:0046325; GO:1901215; GO:0048662; GO:0090209; GO:0005634; GO:0002076; GO:0043204; GO:0048471; GO:0070374; GO:0045742; GO:0050679; GO:0048146; GO:0045944; GO:0060527; GO:0060523; GO:…		SUBCELLULAR LOCATION: Nucleus {ECO:0000256|PIRNR:PIRNR002527, ECO:0000256|SAAS:SAAS00595767}.
G5E965	FOXP1	Evidence at protein level	GO:0005634; GO:0043565; GO:0003700; GO:0006351		SUBCELLULAR LOCATION: Nucleus {ECO:0000256|SAAS:SAAS00582275}.
G5E979	ATG4A	Evidence at protein level	GO:0006914; GO:0004197; GO:0005737; GO:0015031		SUBCELLULAR LOCATION: Cytoplasm {ECO:0000256|SAAS:SAAS00570686}.
G8I0D8	BRCA1	Evidence at transcript level	GO:0031436; GO:0003677; GO:0006310; GO:0006281; GO:0007049; GO:0005694; GO:0016874; GO:0085020; GO:0051865; GO:0004842; GO:0008270		SUBCELLULAR LOCATION: Nucleus {ECO:0000256|PIRNR:PIRNR001734}. Chromosome {ECO:0000256|PIRNR:PIRNR001734}. Note=Localizes at sites of DNA damage at double-strand breaks (DSBs); recruitment to DNA damage sites is mediated by the BRCA1-A complex. {ECO:0000256|PIRNR:PIRNR001734}.
G8JLB0	NR1H4	Inferred from homology	GO:0005634; GO:0043565; GO:0043401; GO:0003700; GO:0006351; GO:0008270		SUBCELLULAR LOCATION: Nucleus {ECO:0000256|SAAS:SAAS00586772}.
G8JLG1	SMC1A	Evidence at protein level	GO:0005524; GO:0006281; GO:0003682; GO:0008280; GO:0007064; GO:0005634		SUBCELLULAR LOCATION: Nucleus {ECO:0000256|PIRNR:PIRNR005719}.
G8JLH9	STAT3	Evidence at protein level	GO:0003677; GO:0005737; GO:0005654; GO:0004871; GO:0003700; GO:0006351		SUBCELLULAR LOCATION: Cytoplasm {ECO:0000256|RuleBase:RU046415}.; SUBCELLULAR LOCATION: Nucleus {ECO:0000256|RuleBase:RU046415}.
H0UI83	hCG_41772	Inferred from homology	GO:0005737; GO:0005634; GO:0019773; GO:0004298; GO:0006511		SUBCELLULAR LOCATION: Cytoplasm {ECO:0000256|RuleBase:RU000551}. Nucleus {ECO:0000256|RuleBase:RU000551}.; SUBCELLULAR LOCATION: Nucleus {ECO:0000256|SAAS:SAAS00594407}.
H0Y2V1	MAP4	Evidence at protein level	GO:0005737; GO:0005874		SUBCELLULAR LOCATION: Cytoplasm, cytoskeleton {ECO:0000256|RuleBase:RU000686}.
H0Y328	NR5A2	Inferred from homology	GO:0005634; GO:0043565; GO:0003707; GO:0003700; GO:0006351; GO:0008270		SUBCELLULAR LOCATION: Nucleus {ECO:0000256|SAAS:SAAS00595767}.
H0Y3W9	EBF3	Inferred from homology	GO:0003677; GO:0046872; GO:0007275; GO:0005634; GO:0006355; GO:0006351		SUBCELLULAR LOCATION: Nucleus {ECO:0000256|RuleBase:RU004489}.
H0Y4T7	MTA1	Evidence at protein level	GO:0005737; GO:0043231; GO:0005654; GO:0043565; GO:0003700; GO:0008270		SUBCELLULAR LOCATION: Nucleus {ECO:0000256|SAAS:SAAS00548613}.
H0Y4W6	ESR1	Evidence at protein level	GO:0005634; GO:0043565; GO:0005496; GO:0003707; GO:0003700; GO:0006351; GO:0008270		SUBCELLULAR LOCATION: Nucleus {ECO:0000256|SAAS:SAAS00595767}.
H0Y562	PTPA	Evidence at protein level	GO:0005737; GO:0003755; GO:0019211		SUBCELLULAR LOCATION: Cytoplasm {ECO:0000256|RuleBase:RU361210}.
H0Y5A7	TBX19	Predicted	GO:0003677; GO:0005634; GO:0003700; GO:0006351		SUBCELLULAR LOCATION: Nucleus {ECO:0000256|SAAS:SAAS00353240}.
H0Y5D5	CIZ1	Evidence at protein level	GO:0003676; GO:0005634; GO:0008270		SUBCELLULAR LOCATION: Nucleus {ECO:0000256|SAAS:SAAS00591741}.
H0Y5F5	PABPC4	Evidence at protein level	GO:0003723; GO:0005737; GO:0000166		SUBCELLULAR LOCATION: Cytoplasm {ECO:0000256|RuleBase:RU362004}.
H0Y5R1	ARNTL2	Evidence at protein level	GO:0005737; GO:0005634; GO:0003700; GO:0005667; GO:0006351		SUBCELLULAR LOCATION: Nucleus {ECO:0000256|SAAS:SAAS00600858}.
H0Y6E5	PTPA	Evidence at protein level	GO:0005737; GO:0003755; GO:0019211		SUBCELLULAR LOCATION: Cytoplasm {ECO:0000256|RuleBase:RU361210}.
H0Y6F5	ZHX3	Evidence at protein level	GO:0003677; GO:0005634		SUBCELLULAR LOCATION: Nucleus {ECO:0000256|RuleBase:RU000682}.
H0Y8E2	NR1I2	Inferred from homology	GO:0005634; GO:0043565; GO:0003707; GO:0004887; GO:0006351; GO:0008270		SUBCELLULAR LOCATION: Nucleus {ECO:0000256|SAAS:SAAS00595767}.
H0Y8E6	MCM2	Evidence at protein level	GO:0005524; GO:0003677; GO:0003678; GO:0006270; GO:0042555; GO:0005634		SUBCELLULAR LOCATION: Nucleus {ECO:0000256|SAAS:SAAS00534438}.
H0Y8L7	RPS3A	Evidence at protein level	GO:0005737; GO:0005730; GO:0005840; GO:0003735; GO:0006412		SUBCELLULAR LOCATION: Cytoplasm {ECO:0000256|SAAS:SAAS00535981}.
H0Y9Y4	RPS3A	Evidence at protein level	GO:0005737; GO:0005730; GO:0005840; GO:0003735; GO:0006412		SUBCELLULAR LOCATION: Cytoplasm {ECO:0000256|SAAS:SAAS00535981}.
H0YBP5	EIF3E	Evidence at protein level	GO:0005852; GO:0003743		SUBCELLULAR LOCATION: Cytoplasm {ECO:0000256|SAAS:SAAS00545126}.
H0YBR5	EIF3E	Evidence at protein level	GO:0005852; GO:0003743		SUBCELLULAR LOCATION: Cytoplasm {ECO:0000256|SAAS:SAAS00545126}.
H0YBT7	HSF4	Inferred from homology	GO:0005634; GO:0006357; GO:0043565; GO:0003700		SUBCELLULAR LOCATION: Nucleus {ECO:0000256|SAAS:SAAS00535900}.
H0YE88	TEAD1	Evidence at protein level	GO:0000978; GO:0035329; GO:0005654; GO:0001077		SUBCELLULAR LOCATION: Nucleus {ECO:0000256|PIRNR:PIRNR002603}.
H0YF22	RCOR3	Evidence at protein level	GO:0003677; GO:0005634		SUBCELLULAR LOCATION: Nucleus {ECO:0000256|SAAS:SAAS00548613}.
H0YFX9	H2AFJ	Evidence at protein level	GO:0003677; GO:0000786; GO:0005634		SUBCELLULAR LOCATION: Nucleus {ECO:0000256|RuleBase:RU000527}.
H0YGT3	ESRRA	Evidence at protein level	GO:0003677; GO:0005634; GO:0006355; GO:0003707; GO:0006351		SUBCELLULAR LOCATION: Nucleus {ECO:0000256|SAAS:SAAS00595767}.
H0YGU5	PHOX2A	Evidence at protein level	GO:0003677; GO:0005634		SUBCELLULAR LOCATION: Nucleus {ECO:0000256|RuleBase:RU000682}.
H0YHW2	E2F7	Evidence at protein level	GO:0003677; GO:0005634; GO:0003700; GO:0005667; GO:0006351		SUBCELLULAR LOCATION: Nucleus {ECO:0000256|RuleBase:RU003796}.
H0YHX3	HOXA4	Inferred from homology	GO:0007275; GO:0005634; GO:0043565; GO:0003700		SUBCELLULAR LOCATION: Nucleus {ECO:0000256|RuleBase:RU000682, ECO:0000256|SAAS:SAAS00544279}.
H0YI10	CERS5	Evidence at protein level	GO:0003677; GO:0005783; GO:0016021; GO:0005634		SUBCELLULAR LOCATION: Nucleus {ECO:0000256|RuleBase:RU000682}.	TRANSMEM 46 64 Helical. {ECO:0000256|SAM:Phobius}.; TRANSMEM 144 163 Helical. {ECO:0000256|SAM:Phobius}.; TRANSMEM 183 202 Helical. {ECO:0000256|SAM:Phobius}.; TRANSMEM 237 256 Helical. {ECO:0000256|SAM:Phobius}.
H0YIA6	HOXA11	Evidence at protein level	GO:0005634; GO:0006355; GO:0043565		SUBCELLULAR LOCATION: Nucleus {ECO:0000256|RuleBase:RU000682, ECO:0000256|SAAS:SAAS00544279}.
H0YIF4	E2F7	Evidence at protein level	GO:0003677; GO:0005634; GO:0003700; GO:0005667; GO:0006351		SUBCELLULAR LOCATION: Nucleus {ECO:0000256|RuleBase:RU003796}.
H0YJC8	NA	Evidence at protein level	GO:0005634; GO:0006355; GO:0043565		SUBCELLULAR LOCATION: Nucleus {ECO:0000256|RuleBase:RU000682, ECO:0000256|SAAS:SAAS00544279}.
H0YK27	POU6F2	Inferred from homology	GO:0003677; GO:0007275; GO:0005634; GO:0003700; GO:0006366		SUBCELLULAR LOCATION: Nucleus {ECO:0000256|RuleBase:RU361194, ECO:0000256|SAAS:SAAS00553137}.
H0YKC7	MKX	Evidence at protein level	GO:0005634; GO:0006355; GO:0043565		SUBCELLULAR LOCATION: Nucleus {ECO:0000256|SAAS:SAAS00563020}.
H0YKC9	CERS4	Evidence at protein level	GO:0003677; GO:0005783; GO:0016021; GO:0005634		SUBCELLULAR LOCATION: Nucleus {ECO:0000256|RuleBase:RU000682}.	TRANSMEM 89 109 Helical. {ECO:0000256|SAM:Phobius}.; TRANSMEM 129 148 Helical. {ECO:0000256|SAM:Phobius}.; TRANSMEM 209 229 Helical. {ECO:0000256|SAM:Phobius}.; TRANSMEM 249 277 Helical. {ECO:0000256|SAM:Phobius}.
H0YKH6	CERS2	Evidence at protein level	GO:0003677; GO:0005783; GO:0016021; GO:0031965		SUBCELLULAR LOCATION: Nucleus {ECO:0000256|RuleBase:RU000682}.	TRANSMEM 45 68 Helical. {ECO:0000256|SAM:Phobius}.; TRANSMEM 140 160 Helical. {ECO:0000256|SAM:Phobius}.; TRANSMEM 180 198 Helical. {ECO:0000256|SAM:Phobius}.
H0YKJ1	HMBOX1	Evidence at protein level	GO:0003677; GO:0005634; GO:0045893		SUBCELLULAR LOCATION: Nucleus {ECO:0000256|RuleBase:RU000682}.
H0YKN5	TGIF2	Evidence at protein level	GO:0003677; GO:0005654; GO:0006355		SUBCELLULAR LOCATION: Nucleus {ECO:0000256|SAAS:SAAS00563020}.
H0YKR4	CERS4	Evidence at protein level	GO:0003677; GO:0005783; GO:0016021; GO:0005634		SUBCELLULAR LOCATION: Nucleus {ECO:0000256|RuleBase:RU000682}.
H0YKT2	POU2F2	Evidence at protein level	GO:0005634; GO:0043565; GO:0003700; GO:0006351		SUBCELLULAR LOCATION: Nucleus {ECO:0000256|RuleBase:RU361194, ECO:0000256|SAAS:SAAS00553137}.
H0YKT8	PSMA4	Evidence at protein level	GO:0005737; GO:0043231; GO:0005634; GO:0005839; GO:0051603; GO:0004298		SUBCELLULAR LOCATION: Cytoplasm {ECO:0000256|RuleBase:RU000694}. Nucleus {ECO:0000256|RuleBase:RU000694}.
H0YKY6	MEF2A	Predicted	GO:0003677; GO:0005634; GO:0006355; GO:0006351		SUBCELLULAR LOCATION: Nucleus {ECO:0000256|RuleBase:RU000476, ECO:0000256|SAAS:SAAS00579852}.
H0YL14	TMEM250	Evidence at protein level	GO:0005525; GO:0007049; GO:0005737; GO:0016021; GO:0005634; GO:0008284; GO:0048524; GO:0016032		SUBCELLULAR LOCATION: Membrane {ECO:0000305}; Multi-pass membrane protein {ECO:0000305}. Nucleus {ECO:0000269|PubMed:21667337}. Cytoplasm {ECO:0000269|PubMed:21667337}. Note=Upon HHV-1 infection, accumulates arround the nuclear membrane and translocates into the nucleus.	TRANSMEM 56 76 Helical. {ECO:0000255}.; TRANSMEM 116 136 Helical. {ECO:0000255}.
H0YL54	LHX9	Predicted	GO:0003677; GO:0005634; GO:0008270		SUBCELLULAR LOCATION: Nucleus {ECO:0000256|RuleBase:RU000682, ECO:0000256|SAAS:SAAS00397436}.
H0YL69	PSMA4	Evidence at protein level	GO:0005737; GO:0043231; GO:0005634; GO:0019773; GO:0004298; GO:0006511		SUBCELLULAR LOCATION: Cytoplasm {ECO:0000256|RuleBase:RU000551}. Nucleus {ECO:0000256|RuleBase:RU000551}.
H0YLB0	PBX1	Evidence at protein level	GO:0005634; GO:0043565; GO:0003700		SUBCELLULAR LOCATION: Nucleus {ECO:0000256|RuleBase:RU000682}.
H0YLC2	PSMA4	Evidence at protein level	GO:0005737; GO:0043231; GO:0005634; GO:0019773; GO:0004298; GO:0006511		SUBCELLULAR LOCATION: Cytoplasm {ECO:0000256|RuleBase:RU000551}. Nucleus {ECO:0000256|RuleBase:RU000551}.; SUBCELLULAR LOCATION: Nucleus {ECO:0000256|SAAS:SAAS00594407}.
H0YLF2	HMBOX1	Evidence at protein level	GO:0003677; GO:0005634; GO:0045893		SUBCELLULAR LOCATION: Nucleus {ECO:0000256|RuleBase:RU000682}.
H0YLF5	PBX1	Evidence at protein level	GO:0003677; GO:0005634; GO:0003700		SUBCELLULAR LOCATION: Nucleus {ECO:0000256|RuleBase:RU000682}.
H0YLK1	SIX5	Evidence at protein level	GO:0005634; GO:0006355; GO:0043565		SUBCELLULAR LOCATION: Nucleus {ECO:0000256|RuleBase:RU000682}.
H0YLL6	POU2F2	Evidence at protein level	GO:0005634; GO:0043565; GO:0003700; GO:0006351		SUBCELLULAR LOCATION: Nucleus {ECO:0000256|RuleBase:RU361194, ECO:0000256|SAAS:SAAS00553137}.
H0YLS5	RORA	Inferred from homology	GO:0005634; GO:0043565; GO:0043401; GO:0003700; GO:0006351; GO:0008270		SUBCELLULAR LOCATION: Nucleus {ECO:0000256|SAAS:SAAS00586772}.
H0YLS6	PSMA4	Evidence at protein level	GO:0005737; GO:0005634; GO:0019773; GO:0004298; GO:0006511		SUBCELLULAR LOCATION: Cytoplasm {ECO:0000256|RuleBase:RU000551}. Nucleus {ECO:0000256|RuleBase:RU000551}.; SUBCELLULAR LOCATION: Nucleus {ECO:0000256|SAAS:SAAS00594407}.
H0YM59	ZNF770	Evidence at protein level	GO:0046872; GO:0003676; GO:0005634; GO:0003700; GO:0006351		SUBCELLULAR LOCATION: Nucleus {ECO:0000256|SAAS:SAAS00535819}.
H0YM62	MEF2A	Predicted	GO:0003677; GO:0005634; GO:0006355; GO:0006351		SUBCELLULAR LOCATION: Nucleus {ECO:0000256|RuleBase:RU000476, ECO:0000256|SAAS:SAAS00579852}.
H0YM91	TBXT	Predicted	GO:0003677; GO:0005634; GO:0003700; GO:0006351		SUBCELLULAR LOCATION: Nucleus {ECO:0000256|SAAS:SAAS00353240}.
H0YMA1	PSMA4	Evidence at protein level	GO:0005737; GO:0043231; GO:0005634; GO:0019773; GO:0004298; GO:0006511		SUBCELLULAR LOCATION: Cytoplasm {ECO:0000256|RuleBase:RU000551}. Nucleus {ECO:0000256|RuleBase:RU000551}.
H0YMI6	PSMA4	Evidence at protein level	GO:0005737; GO:0005634; GO:0019773; GO:0004298; GO:0006511		SUBCELLULAR LOCATION: Cytoplasm {ECO:0000256|RuleBase:RU000551}. Nucleus {ECO:0000256|RuleBase:RU000551}.
H0YMV2	MEIS3	Predicted	GO:0003677; GO:0005634; GO:0006355		SUBCELLULAR LOCATION: Nucleus {ECO:0000256|SAAS:SAAS00563020}.
H0YMZ1	PSMA4	Evidence at protein level	GO:0005737; GO:0043231; GO:0005634; GO:0019773; GO:0004298; GO:0006511		SUBCELLULAR LOCATION: Cytoplasm {ECO:0000256|RuleBase:RU000551}. Nucleus {ECO:0000256|RuleBase:RU000551}.
H0YN04	CERS4	Evidence at protein level	GO:0003677; GO:0005783; GO:0016021; GO:0005634		SUBCELLULAR LOCATION: Nucleus {ECO:0000256|RuleBase:RU000682}.	TRANSMEM 39 56 Helical. {ECO:0000256|SAM:Phobius}.; TRANSMEM 140 160 Helical. {ECO:0000256|SAM:Phobius}.; TRANSMEM 180 199 Helical. {ECO:0000256|SAM:Phobius}.; TRANSMEM 211 238 Helical. {ECO:0000256|SAM:Phobius}.
H0YN05	CERS3	Evidence at protein level	GO:0003677; GO:0005783; GO:0016021; GO:0005634		SUBCELLULAR LOCATION: Nucleus {ECO:0000256|RuleBase:RU000682}.	TRANSMEM 37 56 Helical. {ECO:0000256|SAM:Phobius}.; TRANSMEM 135 154 Helical. {ECO:0000256|SAM:Phobius}.
H0YNA8	MEIS3	Predicted	GO:0003677; GO:0005634; GO:0006355	SIGNAL 1 31 {ECO:0000256|SAM:SignalP}.	SUBCELLULAR LOCATION: Nucleus {ECO:0000256|SAAS:SAAS00563020}.
H0YNI2	MEF2A	Predicted	GO:0003677; GO:0005634; GO:0006355; GO:0006351		SUBCELLULAR LOCATION: Nucleus {ECO:0000256|RuleBase:RU000476, ECO:0000256|SAAS:SAAS00579852}.
H0YNM5	POU1F1	Inferred from homology	GO:0005737; GO:0005654; GO:0043565; GO:0003700; GO:0006351		SUBCELLULAR LOCATION: Nucleus {ECO:0000256|RuleBase:RU361194, ECO:0000256|SAAS:SAAS00553137}.
H0YNR6	CERS4	Evidence at protein level	GO:0003677; GO:0005783; GO:0016021; GO:0005634		SUBCELLULAR LOCATION: Nucleus {ECO:0000256|RuleBase:RU000682}.	TRANSMEM 39 56 Helical. {ECO:0000256|SAM:Phobius}.; TRANSMEM 136 155 Helical. {ECO:0000256|SAM:Phobius}.
H0YNW1	POU2F2	Evidence at protein level	GO:0005634; GO:0043565; GO:0003700; GO:0006351		SUBCELLULAR LOCATION: Nucleus {ECO:0000256|RuleBase:RU361194, ECO:0000256|SAAS:SAAS00553137}.
H0YNY8	MEIS1	Evidence at protein level	GO:0003677; GO:0005634; GO:0006355		SUBCELLULAR LOCATION: Nucleus {ECO:0000256|SAAS:SAAS00563020}.
H2EHT1	TP53	Evidence at transcript level	GO:0006915; GO:0007049; GO:0005737; GO:0046872; GO:0005634; GO:0051262; GO:0003700; GO:0044212; GO:0006351		SUBCELLULAR LOCATION: Cytoplasm {ECO:0000256|RuleBase:RU003304}. Nucleus {ECO:0000256|RuleBase:RU003304}.
H3BLU4	MEIS3	Predicted	GO:0003677; GO:0005634; GO:0006355		SUBCELLULAR LOCATION: Nucleus {ECO:0000256|SAAS:SAAS00563020}.
H3BM92	PMM2	Evidence at protein level	GO:0009298; GO:0005737; GO:0004615		SUBCELLULAR LOCATION: Cytoplasm {ECO:0000256|RuleBase:RU361118}.
H3BMP3	E2F4	Evidence at protein level	GO:0003677; GO:0000278; GO:0005634; GO:0003700; GO:0005667; GO:0006351		SUBCELLULAR LOCATION: Nucleus {ECO:0000256|RuleBase:RU003796}.
H3BMX5	KAT8	Evidence at protein level	GO:0004402; GO:0005634; GO:0006355		SUBCELLULAR LOCATION: Nucleus {ECO:0000256|RuleBase:RU361211}.
H3BN56	TUBGCP4	Evidence at protein level	GO:0005737; GO:0005874; GO:0007020; GO:0005815; GO:0000922		SUBCELLULAR LOCATION: Cytoplasm, cytoskeleton, microtubule organizing center {ECO:0000256|RuleBase:RU363050}.
H3BNL9	TUBGCP4	Evidence at protein level	GO:0005737; GO:0005874; GO:0007020; GO:0005815; GO:0000922		SUBCELLULAR LOCATION: Cytoplasm, cytoskeleton, microtubule organizing center {ECO:0000256|RuleBase:RU363050}.
H3BNM8	USB1	Evidence at protein level	GO:0008380; GO:0034477; GO:0006397; GO:0004518; GO:0005634		SUBCELLULAR LOCATION: Nucleus {ECO:0000256|HAMAP-Rule:MF_03040}.
H3BNR1	BORCS8-MEF2B	Predicted	GO:0003677; GO:0005634; GO:0006355; GO:0006351		SUBCELLULAR LOCATION: Nucleus {ECO:0000256|RuleBase:RU000476, ECO:0000256|SAAS:SAAS00579852}.
H3BNY9	PMM2	Evidence at protein level	GO:0009298; GO:0005737; GO:0004615		SUBCELLULAR LOCATION: Cytoplasm {ECO:0000256|RuleBase:RU361118}.
H3BP52	MGA	Evidence at protein level	GO:0003677; GO:0005737; GO:0005654; GO:0003700; GO:0006351		SUBCELLULAR LOCATION: Nucleus {ECO:0000256|SAAS:SAAS00353240}.
H3BPH4	PMM2	Evidence at protein level	GO:0009298; GO:0005737; GO:0004615		SUBCELLULAR LOCATION: Cytoplasm {ECO:0000256|RuleBase:RU361118}.
H3BPU4	TUBGCP4	Evidence at protein level	GO:0005737; GO:0005874; GO:0007020; GO:0005815; GO:0000922		SUBCELLULAR LOCATION: Cytoplasm, cytoskeleton, microtubule organizing center {ECO:0000256|RuleBase:RU363050}.
H3BQY4	TUBGCP4	Evidence at protein level	GO:0005737; GO:0005874; GO:0007020; GO:0005815; GO:0000922		SUBCELLULAR LOCATION: Cytoplasm, cytoskeleton, microtubule organizing center {ECO:0000256|RuleBase:RU363050}.
H3BR08	PMM2	Evidence at protein level	GO:0009298; GO:0005737; GO:0004615		SUBCELLULAR LOCATION: Cytoplasm {ECO:0000256|RuleBase:RU361118}.
H3BRL0	BBS2	Evidence at protein level	GO:0034464; GO:0060170; GO:0005737; GO:0005815; GO:0035058		SUBCELLULAR LOCATION: Cell projection, cilium membrane {ECO:0000256|PIRNR:PIRNR013684}. Cytoplasm, cytoskeleton, microtubule organizing center, centrosome, centriolar satellite {ECO:0000256|PIRNR:PIRNR013684}.
H3BRM0	PMM2	Evidence at protein level	GO:0009298; GO:0005737; GO:0004615		SUBCELLULAR LOCATION: Cytoplasm {ECO:0000256|RuleBase:RU361118}.
H3BS59	TUBGCP4	Evidence at protein level	GO:0005737; GO:0005874; GO:0007020; GO:0005815; GO:0000922		SUBCELLULAR LOCATION: Cytoplasm, cytoskeleton, microtubule organizing center {ECO:0000256|RuleBase:RU363050}.
H3BSW6	CTU2	Evidence at protein level	GO:0005737; GO:0005739; GO:0016779; GO:0032447; GO:0000049; GO:0034227; GO:0002098		SUBCELLULAR LOCATION: Cytoplasm {ECO:0000256|HAMAP-Rule:MF_03054, ECO:0000256|SAAS:SAAS00545042}.
H3BT06	PMM2	Evidence at protein level	GO:0009298; GO:0005737; GO:0004615		SUBCELLULAR LOCATION: Cytoplasm {ECO:0000256|RuleBase:RU361118}.
H3BT36	NA	Evidence at protein level	GO:0004175; GO:0005634; GO:0019773; GO:0006511		SUBCELLULAR LOCATION: Nucleus {ECO:0000256|SAAS:SAAS00594407}.
H3BTC2	NR2F2	Evidence at protein level	GO:0003677; GO:0004879; GO:0005634; GO:0003707; GO:0006351		SUBCELLULAR LOCATION: Nucleus {ECO:0000256|SAAS:SAAS00595767}.
H3BTF4	MGA	Evidence at protein level	GO:0003677; GO:0005737; GO:0005654; GO:0003700; GO:0006351		SUBCELLULAR LOCATION: Nucleus {ECO:0000256|SAAS:SAAS00353240}.
H3BTM3	E2F4	Evidence at protein level	GO:0003677; GO:0000278; GO:0005634; GO:0003700; GO:0005667; GO:0006351		SUBCELLULAR LOCATION: Nucleus {ECO:0000256|RuleBase:RU003796}.
H3BTT4	CIAPIN1	Evidence at protein level	GO:0051537; GO:0006915; GO:0016226; GO:0046872; GO:0005758		SUBCELLULAR LOCATION: Cytoplasm {ECO:0000256|SAAS:SAAS00563794}.; SUBCELLULAR LOCATION: Mitochondrion intermembrane space {ECO:0000256|SAAS:SAAS00563793}.
H3BTZ8	CIAPIN1	Evidence at protein level	GO:0051537; GO:0006915; GO:0016226; GO:0046872; GO:0005758		SUBCELLULAR LOCATION: Cytoplasm {ECO:0000256|SAAS:SAAS00563794}.; SUBCELLULAR LOCATION: Mitochondrion intermembrane space {ECO:0000256|SAAS:SAAS00563793}.
H3BV34	PMM2	Evidence at protein level	GO:0009298; GO:0005737; GO:0004615		SUBCELLULAR LOCATION: Cytoplasm {ECO:0000256|RuleBase:RU361118}.
H3BV55	PMM2	Evidence at protein level	GO:0009298; GO:0005737; GO:0004615		SUBCELLULAR LOCATION: Cytoplasm {ECO:0000256|RuleBase:RU361118}.
H3BV90	CIAPIN1	Evidence at protein level	GO:0051537; GO:0006915; GO:0016226; GO:0046872; GO:0008168; GO:0005758		SUBCELLULAR LOCATION: Cytoplasm {ECO:0000256|SAAS:SAAS00563794}.; SUBCELLULAR LOCATION: Mitochondrion intermembrane space {ECO:0000256|SAAS:SAAS00563793}.
H3BVD1	SMAD3	Evidence at protein level	GO:0003677; GO:0005737; GO:0005654; GO:0003700; GO:0005667; GO:0006351; GO:0007179		SUBCELLULAR LOCATION: Cytoplasm {ECO:0000256|RuleBase:RU361195}. Nucleus {ECO:0000256|RuleBase:RU361195}.
H3BVE4	E2F4	Evidence at protein level	GO:0003677; GO:0000278; GO:0005634; GO:0003700; GO:0005667; GO:0006351		SUBCELLULAR LOCATION: Nucleus {ECO:0000256|RuleBase:RU003796}.
H6U5S2	NA	Evidence at transcript level	GO:0006915; GO:0007049; GO:0005737; GO:0046872; GO:0005634; GO:0051262; GO:0003700; GO:0044212; GO:0006351		SUBCELLULAR LOCATION: Cytoplasm {ECO:0000256|RuleBase:RU003304}. Nucleus {ECO:0000256|RuleBase:RU003304}.
H6U5S3	NA	Evidence at transcript level	GO:0006915; GO:0007049; GO:0005737; GO:0046872; GO:0005634; GO:0051262; GO:0003700; GO:0044212; GO:0006351		SUBCELLULAR LOCATION: Cytoplasm {ECO:0000256|RuleBase:RU003304}. Nucleus {ECO:0000256|RuleBase:RU003304}.
H6U5S4	NA	Evidence at transcript level	GO:0006915; GO:0007049; GO:0005737; GO:0046872; GO:0005634; GO:0003700; GO:0044212; GO:0006351		SUBCELLULAR LOCATION: Cytoplasm {ECO:0000256|RuleBase:RU003304}. Nucleus {ECO:0000256|RuleBase:RU003304}.
H6U5S5	NA	Evidence at transcript level	GO:0006915; GO:0007049; GO:0005737; GO:0046872; GO:0005634; GO:0003700; GO:0044212; GO:0006351		SUBCELLULAR LOCATION: Cytoplasm {ECO:0000256|RuleBase:RU003304}. Nucleus {ECO:0000256|RuleBase:RU003304}.
H6V745	NR3C1	Evidence at transcript level	GO:0004883; GO:0005634; GO:0043565; GO:0005496; GO:0003700; GO:0006351; GO:0008270		SUBCELLULAR LOCATION: Nucleus {ECO:0000256|SAAS:SAAS00595767}.
H7BYM2	ATG4A	Evidence at protein level	GO:0006914; GO:0004197; GO:0005737; GO:0015031		SUBCELLULAR LOCATION: Cytoplasm {ECO:0000256|SAAS:SAAS00570686}.
H7BYW9	RERE	Evidence at protein level	GO:0003677; GO:0003682; GO:0005634		SUBCELLULAR LOCATION: Nucleus {ECO:0000256|SAAS:SAAS00548613}.
H7BZ00	NR4A2	Inferred from homology	GO:0004879; GO:0005634; GO:0043565; GO:0043401; GO:0006351; GO:0008270		SUBCELLULAR LOCATION: Nucleus {ECO:0000256|SAAS:SAAS00586772}.
H7BZA3	NPAS2	Evidence at protein level	GO:0005737; GO:0005634; GO:0003700; GO:0005667; GO:0006351		SUBCELLULAR LOCATION: Nucleus {ECO:0000256|SAAS:SAAS00600858}.
H7BZT7	ESD	Evidence at protein level	GO:0018738; GO:0052689; GO:0005737; GO:0046294		SUBCELLULAR LOCATION: Cytoplasm {ECO:0000256|RuleBase:RU363068}.
H7BZW5	ATG4C	Evidence at protein level	GO:0006914; GO:0004197; GO:0005737; GO:0015031		SUBCELLULAR LOCATION: Cytoplasm {ECO:0000256|SAAS:SAAS00570686}.
H7C0B1	TBR1	Evidence at protein level	GO:0003677; GO:0005634; GO:0003700; GO:0006351		SUBCELLULAR LOCATION: Nucleus {ECO:0000256|SAAS:SAAS00353240}.
H7C0H1	LHX2	Evidence at protein level	GO:0005634; GO:0006355; GO:0043565; GO:0008270		SUBCELLULAR LOCATION: Nucleus {ECO:0000256|RuleBase:RU000682, ECO:0000256|SAAS:SAAS00397436}.
H7C0S3	CDKN3	Evidence at protein level	GO:0007049; GO:0005737; GO:0048471; GO:0004725		SUBCELLULAR LOCATION: Cytoplasm, perinuclear region {ECO:0000256|PIRNR:PIRNR037322}.
H7C0Z2	NPAS2	Predicted	GO:0005737; GO:0005634; GO:0003700; GO:0005667; GO:0006351		SUBCELLULAR LOCATION: Nucleus {ECO:0000256|SAAS:SAAS00600858}.
H7C2A6	NA	Evidence at protein level	GO:0006914; GO:0004197; GO:0005737; GO:0015031		SUBCELLULAR LOCATION: Cytoplasm {ECO:0000256|SAAS:SAAS00570686}.
H7C2H5	TUBGCP6	Evidence at protein level	GO:0005737; GO:0005874; GO:0007020; GO:0005815; GO:0000922		SUBCELLULAR LOCATION: Cytoplasm, cytoskeleton, microtubule organizing center {ECO:0000256|RuleBase:RU363050}.
H7C2R4	UTP25	Evidence at protein level	GO:0005634		SUBCELLULAR LOCATION: Nucleus {ECO:0000256|SAAS:SAAS00560942}.
H7C358	TUBGCP6	Evidence at protein level	GO:0005737; GO:0005874; GO:0007020; GO:0005815; GO:0000922		SUBCELLULAR LOCATION: Cytoplasm, cytoskeleton, microtubule organizing center {ECO:0000256|RuleBase:RU363050}.
H7C3L1	NR2C2	Evidence at protein level	GO:0003677; GO:0005634; GO:0006355; GO:0003707; GO:0006351		SUBCELLULAR LOCATION: Nucleus {ECO:0000256|SAAS:SAAS00595767}.
H7C3R1	NR2C2	Evidence at protein level	GO:0005634; GO:0006355; GO:0043401; GO:0006351		SUBCELLULAR LOCATION: Nucleus {ECO:0000256|SAAS:SAAS00595767}.
H7C4A8	APEX1	Evidence at protein level	GO:0003677; GO:0006281; GO:0003906; GO:0046872; GO:0005739; GO:0005634		SUBCELLULAR LOCATION: Nucleus {ECO:0000256|RuleBase:RU362131}. Cytoplasm {ECO:0000256|RuleBase:RU362131}. Mitochondrion {ECO:0000256|RuleBase:RU362131}.
H7C4C5	MAP4	Evidence at protein level	GO:0005737; GO:0005874		SUBCELLULAR LOCATION: Cytoplasm, cytoskeleton {ECO:0000256|RuleBase:RU000686}.
H7C4G5	RUVBL1	Evidence at protein level	GO:0005524; GO:0043141; GO:0006310; GO:0006281; GO:0005634; GO:0006355; GO:0006351		SUBCELLULAR LOCATION: Nucleus {ECO:0000256|RuleBase:RU363048}.
H7C4I3	RUVBL1	Evidence at protein level	GO:0005524; GO:0043141; GO:0006310; GO:0006281; GO:0005634; GO:0006355; GO:0006351		SUBCELLULAR LOCATION: Nucleus {ECO:0000256|RuleBase:RU363048}.
H9NIM2	NR2C1	Evidence at transcript level	GO:0016605; GO:0000978; GO:0048386; GO:0003707; GO:0006351; GO:0001078; GO:0008270		SUBCELLULAR LOCATION: Nucleus {ECO:0000256|SAAS:SAAS00595767}.
H9NIM3	NA	Evidence at transcript level	GO:0005634; GO:0043565; GO:0003707; GO:0003700; GO:0006351; GO:0008270		SUBCELLULAR LOCATION: Nucleus {ECO:0000256|SAAS:SAAS00595767}.
H9U921	SRY	Inferred from homology	GO:0003677; GO:0030154; GO:0030238; GO:0005634; GO:0007548; GO:0003700; GO:0006351		SUBCELLULAR LOCATION: Nucleus {ECO:0000256|SAAS:SAAS00548902}.
H9U923	SRY	Inferred from homology	GO:0003677; GO:0030154; GO:0030238; GO:0005634; GO:0007548; GO:0003700; GO:0006351		SUBCELLULAR LOCATION: Nucleus {ECO:0000256|SAAS:SAAS00548902}.
H9U933	SRY	Inferred from homology	GO:0003677; GO:0030154; GO:0030238; GO:0005634; GO:0007548; GO:0003700; GO:0006351		SUBCELLULAR LOCATION: Nucleus {ECO:0000256|SAAS:SAAS00548902}.
I0EZ61	DUX5	Predicted	GO:0003677; GO:0005634		SUBCELLULAR LOCATION: Nucleus {ECO:0000256|RuleBase:RU000682}.
I0J062	PANO1	Evidence at transcript level	GO:0006915; GO:0032435; GO:0005730; GO:0043065; GO:0031647		SUBCELLULAR LOCATION: Nucleus, nucleolus {ECO:0000269|PubMed:22094112}. Note=Colocalizes with CDKN2A/p14ARF in the nucleolus. {ECO:0000269|PubMed:22094112}.
I3L0F9	NA	Evidence at protein level	GO:0003677; GO:0005634		SUBCELLULAR LOCATION: Nucleus {ECO:0000256|RuleBase:RU000682}.
I3L170	MAPT	Evidence at protein level	GO:0005737; GO:0005874		SUBCELLULAR LOCATION: Cytoplasm, cytoskeleton {ECO:0000256|RuleBase:RU000686}.
I3L1J3	ZSCAN10	Evidence at protein level	GO:0046872; GO:0003676; GO:0005634; GO:0003700; GO:0006351		SUBCELLULAR LOCATION: Nucleus {ECO:0000256|SAAS:SAAS00574784}.
I3L2B0	CLUH	Evidence at protein level	GO:0005737; GO:0048312		SUBCELLULAR LOCATION: Cytoplasm {ECO:0000256|SAAS:SAAS00003529}.
I3L383	HOXB8	Evidence at protein level	GO:0005634; GO:0006355; GO:0043565		SUBCELLULAR LOCATION: Nucleus {ECO:0000256|RuleBase:RU000682, ECO:0000256|SAAS:SAAS00544279}.
I3L3R1	HOXB8	Evidence at protein level	GO:0007275; GO:0005634; GO:0043565; GO:0003700		SUBCELLULAR LOCATION: Nucleus {ECO:0000256|RuleBase:RU000682, ECO:0000256|SAAS:SAAS00544279}.
I3L4J6	ZNF232	Evidence at protein level	GO:0046872; GO:0003676; GO:0005634; GO:0003700; GO:0006351		SUBCELLULAR LOCATION: Nucleus {ECO:0000256|SAAS:SAAS00574784}.
I3VM53	KDM2A	Evidence at transcript level	GO:0003677; GO:0008168; GO:0005730; GO:0005634; GO:0008270		SUBCELLULAR LOCATION: Nucleus {ECO:0000256|SAAS:SAAS00575847}.
I3VM54	KDM2A	Evidence at protein level	GO:0003677; GO:0008168; GO:0005730; GO:0005634; GO:0008270		SUBCELLULAR LOCATION: Nucleus {ECO:0000256|SAAS:SAAS00575847}.
I6L9E7	ARNT	Evidence at transcript level	GO:0005737; GO:0005634; GO:0003700; GO:0005667; GO:0006351		SUBCELLULAR LOCATION: Nucleus {ECO:0000256|SAAS:SAAS00600858}.
I6L9F7	HIST1H2BM	Evidence at transcript level	GO:0003677; GO:0005737; GO:0005654; GO:0000786		SUBCELLULAR LOCATION: Chromosome {ECO:0000256|SAAS:SAAS00593243}.; SUBCELLULAR LOCATION: Nucleus {ECO:0000256|RuleBase:RU000451, ECO:0000256|SAAS:SAAS00593244}.
I6L9H2	DNMT1	Evidence at transcript level	GO:0003886; GO:0003677; GO:0003682; GO:0005634; GO:0008270		SUBCELLULAR LOCATION: Nucleus {ECO:0000256|PIRNR:PIRNR037404}.
I6MBV4	NA	Evidence at transcript level	GO:0005524; GO:0003677; GO:0016021; GO:0046872; GO:0007275; GO:0005634; GO:0006355; GO:0006351; GO:0004714; GO:0007169		SUBCELLULAR LOCATION: Nucleus {ECO:0000256|RuleBase:RU004489}.	TRANSMEM 587 611 Helical. {ECO:0000256|SAM:Phobius}.
J3JS70	RXRB	Inferred from homology	GO:0005581; GO:0005634; GO:0005840; GO:0043565; GO:0003700; GO:0006351; GO:0008270		SUBCELLULAR LOCATION: Nucleus {ECO:0000256|SAAS:SAAS00586772}.
J3JS71	RXRB	Inferred from homology	GO:0005581; GO:0005634; GO:0005840; GO:0043565; GO:0003707; GO:0003700; GO:0006351; GO:0008270		SUBCELLULAR LOCATION: Nucleus {ECO:0000256|SAAS:SAAS00595767}.
J3KN32	NA	Evidence at protein level	GO:0003677; GO:0005654		SUBCELLULAR LOCATION: Nucleus {ECO:0000256|SAAS:SAAS00548613}.
J3KN34	PTPN3	Evidence at protein level	GO:0005737; GO:0005856; GO:0019898; GO:0004725		SUBCELLULAR LOCATION: Cytoplasm, cytoskeleton {ECO:0000256|PIRNR:PIRNR000927}.
J3KNW3	RBFOX1	Predicted	GO:0003723; GO:0008380; GO:0006397; GO:0000166; GO:0005634; GO:0043484		SUBCELLULAR LOCATION: Nucleus {ECO:0000256|PIRNR:PIRNR037932}.
J3KP33	TP53	Evidence at protein level	GO:0006915; GO:0007049; GO:0005737; GO:0046872; GO:0005634; GO:0003700; GO:0044212; GO:0006351		SUBCELLULAR LOCATION: Cytoplasm {ECO:0000256|RuleBase:RU003304}. Nucleus {ECO:0000256|RuleBase:RU003304}.
J3KP52	NA	Evidence at protein level	GO:0003677; GO:0035329; GO:0005634; GO:0003700; GO:0006351		SUBCELLULAR LOCATION: Nucleus {ECO:0000256|PIRNR:PIRNR002603}.
J3KP55	DLX1	Evidence at protein level	GO:0003677; GO:0005634		SUBCELLULAR LOCATION: Nucleus {ECO:0000256|RuleBase:RU000682}.
J3KP65	TBXT	Predicted	GO:0003677; GO:0005634; GO:0003700; GO:0006351		SUBCELLULAR LOCATION: Nucleus {ECO:0000256|SAAS:SAAS00353240}.
J3KPG0	PAX4	Predicted	GO:0007275; GO:0005634; GO:0006355; GO:0043565; GO:0006351		SUBCELLULAR LOCATION: Nucleus {ECO:0000256|RuleBase:RU000491, ECO:0000256|SAAS:SAAS00117811}.
J3KPM9	STAT1	Evidence at protein level	GO:0003677; GO:0005737; GO:0005730; GO:0005654; GO:0004871; GO:0003700; GO:0006351		SUBCELLULAR LOCATION: Cytoplasm {ECO:0000256|RuleBase:RU046415}.; SUBCELLULAR LOCATION: Nucleus {ECO:0000256|RuleBase:RU046415}.
J3KPQ3	NR1I2	Inferred from homology	GO:0005634; GO:0043565; GO:0003707; GO:0003700; GO:0006351; GO:0008270		SUBCELLULAR LOCATION: Nucleus {ECO:0000256|SAAS:SAAS00595767}.
J3KQ32	OLA1	Evidence at protein level	GO:0005524; GO:0016887; GO:0005525; GO:0005813; GO:0005737; GO:0005730; GO:0043023; GO:0043022		SUBCELLULAR LOCATION: Cytoplasm {ECO:0000256|HAMAP-Rule:MF_03167}. Nucleus {ECO:0000256|HAMAP-Rule:MF_03167}. Nucleus, nucleolus {ECO:0000256|HAMAP-Rule:MF_03167}. Note=Predominantly cytoplasmic, shuttles between the nucleus and the cytoplasm. {ECO:0000256|HAMAP-Rule:MF_03167}.
J3KQE5	RAN	Evidence at protein level	GO:0005525; GO:0003924; GO:0006886; GO:0006913; GO:0005634; GO:0007264		SUBCELLULAR LOCATION: Nucleus {ECO:0000256|RuleBase:RU363057}.
J3KR72	TAF6	Evidence at protein level	GO:0006352; GO:0005737; GO:0005634; GO:0051090		SUBCELLULAR LOCATION: Nucleus {ECO:0000256|SAAS:SAAS00570996}.
J3KS05	CBX1	Evidence at protein level	GO:0005634		SUBCELLULAR LOCATION: Nucleus {ECO:0000256|SAAS:SAAS00539054}.
J3KS32	TGIF1	Evidence at protein level	GO:0003677; GO:0005634; GO:0006355		SUBCELLULAR LOCATION: Nucleus {ECO:0000256|SAAS:SAAS00563020}.
J3KS51	NCOR1	Evidence at protein level	GO:0003677; GO:0005634		SUBCELLULAR LOCATION: Nucleus {ECO:0000256|SAAS:SAAS00548613}.
J3KSH6	HES7	Evidence at protein level	GO:0003677; GO:0007219; GO:0000122; GO:0005634; GO:0006351		SUBCELLULAR LOCATION: Nucleus {ECO:0000256|SAAS:SAAS00573650}.
J3KSJ4	RARA	Evidence at protein level	GO:0005634; GO:0003708; GO:0043565; GO:0003707; GO:0006351; GO:0008270		SUBCELLULAR LOCATION: Nucleus {ECO:0000256|SAAS:SAAS00595767}.
J3QLR1	RUVBL1	Evidence at protein level	GO:0005524; GO:0043141; GO:0006310; GO:0006281; GO:0005634; GO:0006355; GO:0006351		SUBCELLULAR LOCATION: Nucleus {ECO:0000256|RuleBase:RU363048}.
J3QRA9	THRA	Evidence at protein level	GO:0005634; GO:0043565; GO:0004887; GO:0006351; GO:0008270		SUBCELLULAR LOCATION: Nucleus {ECO:0000256|SAAS:SAAS00586772}.
J3QRF4	RBFOX3	Evidence at protein level	GO:0003723; GO:0008380; GO:0006397; GO:0000166; GO:0005634; GO:0043484		SUBCELLULAR LOCATION: Nucleus {ECO:0000256|PIRNR:PIRNR037932}.
J3QSB7	MTAP	Evidence at protein level	GO:0017061; GO:0005737; GO:0005634; GO:0006166		SUBCELLULAR LOCATION: Cytoplasm {ECO:0000256|HAMAP-Rule:MF_03155}. Nucleus {ECO:0000256|HAMAP-Rule:MF_03155}.
J3QSB9	SUPT4H1	Evidence at protein level	GO:0005634; GO:0032786; GO:0006351; GO:0008270		SUBCELLULAR LOCATION: Nucleus {ECO:0000256|PIRNR:PIRNR025023}.
J3QSE8	NA	Evidence at protein level	GO:0005524; GO:0004003; GO:0003677; GO:0006139; GO:0005634		SUBCELLULAR LOCATION: Nucleus {ECO:0000256|SAAS:SAAS00553264}.
J7H3Y9	NA	Predicted	GO:0005634; GO:0006355; GO:0043565		SUBCELLULAR LOCATION: Nucleus {ECO:0000256|RuleBase:RU000682}.
J7H3Z5	NA	Predicted	GO:0005634; GO:0006355; GO:0043565		SUBCELLULAR LOCATION: Nucleus {ECO:0000256|RuleBase:RU000682}.
J7H408	NA	Predicted	GO:0005634; GO:0006355; GO:0043565		SUBCELLULAR LOCATION: Nucleus {ECO:0000256|RuleBase:RU000682}.
J7H412	NA	Predicted	GO:0005634; GO:0006355; GO:0043565		SUBCELLULAR LOCATION: Nucleus {ECO:0000256|RuleBase:RU000682}.
J7H416	NA	Predicted	GO:0005634; GO:0006355; GO:0043565		SUBCELLULAR LOCATION: Nucleus {ECO:0000256|RuleBase:RU000682}.
J7H738	NA	Predicted	GO:0005634; GO:0006355; GO:0043565		SUBCELLULAR LOCATION: Nucleus {ECO:0000256|RuleBase:RU000682}.
J7H745	NA	Predicted	GO:0005634; GO:0006355; GO:0043565		SUBCELLULAR LOCATION: Nucleus {ECO:0000256|RuleBase:RU000682}.
J7H749	NA	Predicted	GO:0005634; GO:0006355; GO:0043565		SUBCELLULAR LOCATION: Nucleus {ECO:0000256|RuleBase:RU000682}.
J7H9S6	NA	Predicted	GO:0005634; GO:0006355; GO:0043565		SUBCELLULAR LOCATION: Nucleus {ECO:0000256|RuleBase:RU000682}.
J7H9T4	NA	Predicted	GO:0005634; GO:0006355; GO:0043565		SUBCELLULAR LOCATION: Nucleus {ECO:0000256|RuleBase:RU000682}.
J7HAW9	NA	Predicted	GO:0005634; GO:0006355; GO:0043565		SUBCELLULAR LOCATION: Nucleus {ECO:0000256|RuleBase:RU000682}.
J7HAX1	NA	Predicted	GO:0005634; GO:0006355; GO:0043565		SUBCELLULAR LOCATION: Nucleus {ECO:0000256|RuleBase:RU000682}.
J7HAX8	NA	Predicted	GO:0005634; GO:0006355; GO:0043565		SUBCELLULAR LOCATION: Nucleus {ECO:0000256|RuleBase:RU000682}.
J9R021	eIF3a	Evidence at transcript level	GO:0016282; GO:0033290; GO:0005852; GO:0001731; GO:0006446; GO:0003743		SUBCELLULAR LOCATION: Cytoplasm {ECO:0000256|HAMAP-Rule:MF_03000, ECO:0000256|SAAS:SAAS00535959}.
J9RYE1	NA	Evidence at transcript level	GO:0005634; GO:0043565; GO:0003700; GO:0006351		SUBCELLULAR LOCATION: Nucleus {ECO:0000256|SAAS:SAAS00582275}.
J9SW06	NA	Evidence at transcript level	GO:0005634; GO:0043565; GO:0003700; GO:0006351		SUBCELLULAR LOCATION: Nucleus {ECO:0000256|SAAS:SAAS00582275}.
J9SY82	NA	Evidence at transcript level	GO:0005634; GO:0043565; GO:0003700; GO:0006351		SUBCELLULAR LOCATION: Nucleus {ECO:0000256|SAAS:SAAS00582275}.
K7EIG1	CLUH	Evidence at protein level	GO:0005737; GO:0048312		SUBCELLULAR LOCATION: Cytoplasm {ECO:0000256|SAAS:SAAS00003529}.
K7EIJ2	SMAD4	Evidence at protein level	GO:0005634; GO:0003700; GO:0005667; GO:0006351; GO:0007179		SUBCELLULAR LOCATION: Nucleus {ECO:0000256|SAAS:SAAS00573677}.
K7EIU8	SMAD4	Evidence at protein level	GO:0003677; GO:0005737; GO:0005634; GO:0003700; GO:0005667; GO:0006351; GO:0007179		SUBCELLULAR LOCATION: Cytoplasm {ECO:0000256|RuleBase:RU361195}. Nucleus {ECO:0000256|RuleBase:RU361195}.; SUBCELLULAR LOCATION: Nucleus {ECO:0000256|SAAS:SAAS00573677}.
K7EJA5	ATG4D	Evidence at protein level	GO:0006914; GO:0008234; GO:0005737; GO:0015031		SUBCELLULAR LOCATION: Cytoplasm {ECO:0000256|SAAS:SAAS00570686}.
K7EJB0	NFIX	Evidence at protein level	GO:0006260; GO:0005634; GO:0003700; GO:0006351		SUBCELLULAR LOCATION: Nucleus {ECO:0000256|SAAS:SAAS00573677}.
K7EJX0	SMAD2	Evidence at protein level	GO:0005634; GO:0003700; GO:0005667; GO:0006351; GO:0007179		SUBCELLULAR LOCATION: Nucleus {ECO:0000256|SAAS:SAAS00573677}.
K7EK07	H3F3B	Evidence at protein level	GO:0003677; GO:0000786; GO:0005634		SUBCELLULAR LOCATION: Chromosome {ECO:0000256|SAAS:SAAS00597685}.; SUBCELLULAR LOCATION: Nucleus {ECO:0000256|SAAS:SAAS00597723}.
K7EK35	STAT5A	Evidence at protein level	GO:0003677; GO:0005737; GO:0005654; GO:0004871; GO:0003700; GO:0006351		SUBCELLULAR LOCATION: Cytoplasm {ECO:0000256|RuleBase:RU046415}.; SUBCELLULAR LOCATION: Nucleus {ECO:0000256|RuleBase:RU046415}.
K7EK53	EIF3K	Evidence at protein level	GO:0005737; GO:0005852; GO:0006446; GO:0043022; GO:0003743		SUBCELLULAR LOCATION: Cytoplasm {ECO:0000256|SAAS:SAAS00533625}.
K7EKH0	NFIX	Evidence at protein level	GO:0006260; GO:0005634; GO:0003700; GO:0006351		SUBCELLULAR LOCATION: Nucleus {ECO:0000256|SAAS:SAAS00573677}.
K7EL15	SMAD4	Evidence at protein level	GO:0005634; GO:0003700; GO:0005667; GO:0006351; GO:0007179		SUBCELLULAR LOCATION: Nucleus {ECO:0000256|SAAS:SAAS00573677}.
K7EL18	SMAD4	Evidence at protein level	GO:0005634; GO:0003700; GO:0005667; GO:0006351; GO:0007179		SUBCELLULAR LOCATION: Nucleus {ECO:0000256|SAAS:SAAS00573677}.
K7EL92	SMAD2	Evidence at protein level	GO:0005634; GO:0003700; GO:0005667; GO:0006351; GO:0007179		SUBCELLULAR LOCATION: Nucleus {ECO:0000256|SAAS:SAAS00573677}.
K7ELA4	CBX1	Evidence at protein level	GO:0005634		SUBCELLULAR LOCATION: Nucleus {ECO:0000256|SAAS:SAAS00539527}.
K7EMB9	ATG4D	Inferred from homology	GO:0006914; GO:0008234; GO:0005737; GO:0015031		SUBCELLULAR LOCATION: Cytoplasm {ECO:0000256|SAAS:SAAS00570686}.
K7EMC4	ZSCAN5A	Evidence at protein level	GO:0046872; GO:0003676; GO:0005634; GO:0003700; GO:0006351		SUBCELLULAR LOCATION: Nucleus {ECO:0000256|SAAS:SAAS00535819}.
K7EMT0	SF3A2	Evidence at protein level	GO:0003676; GO:0005634; GO:0008270		SUBCELLULAR LOCATION: Nucleus {ECO:0000256|SAAS:SAAS00591741}.
K7EMV3	H3F3B	Evidence at protein level	GO:0003677; GO:0000786; GO:0005634		SUBCELLULAR LOCATION: Chromosome {ECO:0000256|SAAS:SAAS00597685}.; SUBCELLULAR LOCATION: Nucleus {ECO:0000256|SAAS:SAAS00597723}.
K7EMZ3	ATXN7L3	Evidence at protein level	GO:0005634		SUBCELLULAR LOCATION: Nucleus {ECO:0000256|RuleBase:RU261113}.
K7EN08	NFIX	Evidence at protein level	GO:0003677; GO:0006260; GO:0005634; GO:0003700; GO:0006351		SUBCELLULAR LOCATION: Nucleus {ECO:0000256|RuleBase:RU000690, ECO:0000256|SAAS:SAAS00573677}.
K7EN30	ATG4D	Evidence at protein level	GO:0006914; GO:0008234; GO:0005737; GO:0015031		SUBCELLULAR LOCATION: Cytoplasm {ECO:0000256|SAAS:SAAS00570686}.
K7ENA8	EIF3G	Evidence at protein level	GO:0005737; GO:0005852; GO:0000166; GO:0003743		SUBCELLULAR LOCATION: Cytoplasm {ECO:0000256|SAAS:SAAS00538423}.
K7ENG1	SMAD4	Evidence at protein level	GO:0005634; GO:0003700; GO:0005667; GO:0006351; GO:0007179		SUBCELLULAR LOCATION: Nucleus {ECO:0000256|SAAS:SAAS00573677}.
K7ENG8	SMAD4	Evidence at protein level	GO:0005634; GO:0003700; GO:0005667; GO:0006351; GO:0007179		SUBCELLULAR LOCATION: Nucleus {ECO:0000256|SAAS:SAAS00573677}.
K7ENZ2	ATXN7L3	Evidence at protein level	GO:0005634		SUBCELLULAR LOCATION: Nucleus {ECO:0000256|RuleBase:RU261113}.
K7EP01	H3F3B	Evidence at protein level	GO:0003677; GO:0000786; GO:0005634		SUBCELLULAR LOCATION: Chromosome {ECO:0000256|SAAS:SAAS00597685}.; SUBCELLULAR LOCATION: Nucleus {ECO:0000256|SAAS:SAAS00597723}.
K7EP16	EIF3G	Evidence at protein level	GO:0005852; GO:0000166; GO:0003743		SUBCELLULAR LOCATION: Cytoplasm {ECO:0000256|SAAS:SAAS00548884}.
K7EP43	ATG4D	Inferred from homology	GO:0006914; GO:0008234; GO:0005737; GO:0015031		SUBCELLULAR LOCATION: Cytoplasm {ECO:0000256|SAAS:SAAS00570686}.
K7EPJ0	ATG4D	Inferred from homology	GO:0006914; GO:0008234; GO:0005737; GO:0015031		SUBCELLULAR LOCATION: Cytoplasm {ECO:0000256|SAAS:SAAS00570686}.
K7EPY2	TBX4	Predicted	GO:0003677; GO:0005634; GO:0003700; GO:0006351		SUBCELLULAR LOCATION: Nucleus {ECO:0000256|SAAS:SAAS00353240}.
K7EQ67	ATG4D	Evidence at protein level	GO:0006914; GO:0008234; GO:0005737; GO:0015031		SUBCELLULAR LOCATION: Cytoplasm {ECO:0000256|SAAS:SAAS00570686}.
K7ERC7	SMAD2	Evidence at protein level	GO:0005634; GO:0003700; GO:0005667; GO:0006351; GO:0007179		SUBCELLULAR LOCATION: Nucleus {ECO:0000256|SAAS:SAAS00573677}.
K7ERF1	EIF3K	Evidence at protein level	GO:0016282; GO:0033290; GO:0005852; GO:0001731; GO:0005634; GO:0006446; GO:0043022; GO:0003743		SUBCELLULAR LOCATION: Cytoplasm {ECO:0000256|SAAS:SAAS00533625}.; SUBCELLULAR LOCATION: Nucleus {ECO:0000256|HAMAP-Rule:MF_03010}. Cytoplasm {ECO:0000256|HAMAP-Rule:MF_03010}.
K7ERK1	ATG4D	Inferred from homology	GO:0006914; GO:0008234; GO:0005737; GO:0015031		SUBCELLULAR LOCATION: Cytoplasm {ECO:0000256|SAAS:SAAS00570686}.
K7ERX2	ETV2	Inferred from homology	GO:0005634; GO:0043565; GO:0003700		SUBCELLULAR LOCATION: Nucleus {ECO:0000256|SAAS:SAAS00594387}.
K7ES00	H3F3B	Evidence at protein level	GO:0003677; GO:0000786; GO:0005634		SUBCELLULAR LOCATION: Chromosome {ECO:0000256|SAAS:SAAS00597685}.; SUBCELLULAR LOCATION: Nucleus {ECO:0000256|SAAS:SAAS00597723}.
K7ES96	SMAD4	Evidence at protein level	GO:0005634; GO:0003700; GO:0005667; GO:0006351; GO:0007179		SUBCELLULAR LOCATION: Nucleus {ECO:0000256|SAAS:SAAS00573677}.
K7ESG9	NFIX	Evidence at protein level	GO:0006260; GO:0005634; GO:0003700; GO:0006351		SUBCELLULAR LOCATION: Nucleus {ECO:0000256|SAAS:SAAS00573677}.
K7ESI8	SMAD2	Evidence at protein level	GO:0005634; GO:0003700; GO:0005667; GO:0006351; GO:0007179		SUBCELLULAR LOCATION: Nucleus {ECO:0000256|SAAS:SAAS00573677}.
K7ESM5	TUBB6	Evidence at protein level	GO:0005525; GO:0003924; GO:0005737; GO:0005874; GO:0007017; GO:0005200		SUBCELLULAR LOCATION: Cytoplasm, cytoskeleton {ECO:0000256|SAAS:SAAS00045381}.
K7ESM7	ATG4D	Evidence at protein level	GO:0006914; GO:0008234; GO:0005737; GO:0015031		SUBCELLULAR LOCATION: Cytoplasm {ECO:0000256|SAAS:SAAS00570686}.
K7PPA8	TP53	Evidence at transcript level	GO:0006915; GO:0007049; GO:0005737; GO:0046872; GO:0005634; GO:0051262; GO:0003700; GO:0044212; GO:0006351		SUBCELLULAR LOCATION: Cytoplasm {ECO:0000256|RuleBase:RU003304}. Nucleus {ECO:0000256|RuleBase:RU003304}.
K7PPU4	TP53	Evidence at transcript level	GO:0006915; GO:0007049; GO:0005737; GO:0046872; GO:0005634; GO:0051262; GO:0003700; GO:0044212; GO:0006351		SUBCELLULAR LOCATION: Cytoplasm {ECO:0000256|RuleBase:RU003304}. Nucleus {ECO:0000256|RuleBase:RU003304}.
L0B1R1	REST	Evidence at transcript level	GO:0000981; GO:0046872; GO:0045665; GO:0003676; GO:0005634; GO:0043065; GO:0006351		SUBCELLULAR LOCATION: Nucleus {ECO:0000256|SAAS:SAAS00535819}.
L0B1S6	REST	Evidence at protein level	GO:0000981; GO:0046872; GO:0045665; GO:0003676; GO:0005634; GO:0043065; GO:0006351		SUBCELLULAR LOCATION: Nucleus {ECO:0000256|SAAS:SAAS00535819}.
L0B1U4	REST	Evidence at transcript level	GO:0000981; GO:0046872; GO:0045665; GO:0003676; GO:0005634; GO:0043065; GO:0006351		SUBCELLULAR LOCATION: Nucleus {ECO:0000256|SAAS:SAAS00535819}.
L0B1V4	REST	Evidence at transcript level	GO:0046872; GO:0003676; GO:0005634; GO:0003700; GO:0006351		SUBCELLULAR LOCATION: Nucleus {ECO:0000256|SAAS:SAAS00535819}.
L0B2U7	REST	Evidence at transcript level	GO:0046872; GO:0003676; GO:0005634; GO:0003700; GO:0006351		SUBCELLULAR LOCATION: Nucleus {ECO:0000256|SAAS:SAAS00535819}.
L0B2V3	REST	Evidence at transcript level	GO:0046872; GO:0003676; GO:0005634; GO:0003700; GO:0006351		SUBCELLULAR LOCATION: Nucleus {ECO:0000256|SAAS:SAAS00535819}.
L0B2V9	REST	Evidence at transcript level	GO:0046872; GO:0003676; GO:0005634; GO:0003700; GO:0006351		SUBCELLULAR LOCATION: Nucleus {ECO:0000256|SAAS:SAAS00535819}.
L0B3M6	REST	Evidence at transcript level	GO:0000981; GO:0046872; GO:0045665; GO:0005634; GO:0043065; GO:0006351		SUBCELLULAR LOCATION: Nucleus {ECO:0000256|SAAS:SAAS00535819}.
L0B3N3	REST	Evidence at transcript level	GO:0000981; GO:0046872; GO:0045665; GO:0003676; GO:0005634; GO:0043065; GO:0006351		SUBCELLULAR LOCATION: Nucleus {ECO:0000256|SAAS:SAAS00535819}.
L0B3Y5	REST	Evidence at transcript level	GO:0046872; GO:0003676; GO:0005634; GO:0003700; GO:0006351		SUBCELLULAR LOCATION: Nucleus {ECO:0000256|SAAS:SAAS00535819}.
L0B3Z2	REST	Evidence at protein level	GO:0046872; GO:0003676; GO:0005634; GO:0003700; GO:0006351		SUBCELLULAR LOCATION: Nucleus {ECO:0000256|SAAS:SAAS00535819}.
L0ENF7	TP53	Inferred from homology	GO:0006915; GO:0007049; GO:0005737; GO:0046872; GO:0005634; GO:0003700; GO:0044212; GO:0006351		SUBCELLULAR LOCATION: Cytoplasm {ECO:0000256|RuleBase:RU003304}. Nucleus {ECO:0000256|RuleBase:RU003304}.
L0ENG6	TP53	Inferred from homology	GO:0006915; GO:0007049; GO:0005737; GO:0046872; GO:0005634; GO:0003700; GO:0044212; GO:0006351		SUBCELLULAR LOCATION: Cytoplasm {ECO:0000256|RuleBase:RU003304}. Nucleus {ECO:0000256|RuleBase:RU003304}.
L0ENG9	TP53	Inferred from homology	GO:0006915; GO:0007049; GO:0005737; GO:0046872; GO:0005634; GO:0003700; GO:0044212; GO:0006351		SUBCELLULAR LOCATION: Cytoplasm {ECO:0000256|RuleBase:RU003304}. Nucleus {ECO:0000256|RuleBase:RU003304}.
L0EP82	TP53	Inferred from homology	GO:0006915; GO:0007049; GO:0005737; GO:0046872; GO:0005634; GO:0003700; GO:0044212; GO:0006351		SUBCELLULAR LOCATION: Cytoplasm {ECO:0000256|RuleBase:RU003304}. Nucleus {ECO:0000256|RuleBase:RU003304}.
L0EP99	TP53	Inferred from homology	GO:0006915; GO:0007049; GO:0005737; GO:0046872; GO:0005634; GO:0003700; GO:0044212; GO:0006351		SUBCELLULAR LOCATION: Cytoplasm {ECO:0000256|RuleBase:RU003304}. Nucleus {ECO:0000256|RuleBase:RU003304}.
L0EPV7	TP53	Inferred from homology	GO:0006915; GO:0007049; GO:0005737; GO:0046872; GO:0005634; GO:0003700; GO:0044212; GO:0006351		SUBCELLULAR LOCATION: Cytoplasm {ECO:0000256|RuleBase:RU003304}. Nucleus {ECO:0000256|RuleBase:RU003304}.
L0EPW3	TP53	Inferred from homology	GO:0006915; GO:0007049; GO:0005737; GO:0046872; GO:0005634; GO:0003700; GO:0044212; GO:0006351		SUBCELLULAR LOCATION: Cytoplasm {ECO:0000256|RuleBase:RU003304}. Nucleus {ECO:0000256|RuleBase:RU003304}.
L0EPY0	TP53	Inferred from homology	GO:0006915; GO:0007049; GO:0005737; GO:0046872; GO:0005634; GO:0003700; GO:0044212; GO:0006351		SUBCELLULAR LOCATION: Cytoplasm {ECO:0000256|RuleBase:RU003304}. Nucleus {ECO:0000256|RuleBase:RU003304}.
L0EPZ1	TP53	Inferred from homology	GO:0006915; GO:0007049; GO:0005737; GO:0046872; GO:0005634; GO:0003700; GO:0044212; GO:0006351		SUBCELLULAR LOCATION: Cytoplasm {ECO:0000256|RuleBase:RU003304}. Nucleus {ECO:0000256|RuleBase:RU003304}.
L0EQ03	TP53	Inferred from homology	GO:0006915; GO:0007049; GO:0005737; GO:0046872; GO:0005634; GO:0003700; GO:0044212; GO:0006351		SUBCELLULAR LOCATION: Cytoplasm {ECO:0000256|RuleBase:RU003304}. Nucleus {ECO:0000256|RuleBase:RU003304}.
L0EQ05	TP53	Inferred from homology	GO:0006915; GO:0007049; GO:0005737; GO:0046872; GO:0005634; GO:0003700; GO:0044212; GO:0006351		SUBCELLULAR LOCATION: Cytoplasm {ECO:0000256|RuleBase:RU003304}. Nucleus {ECO:0000256|RuleBase:RU003304}.
L0EQ52	TP53	Inferred from homology	GO:0006915; GO:0007049; GO:0005737; GO:0046872; GO:0005634; GO:0003700; GO:0044212; GO:0006351		SUBCELLULAR LOCATION: Cytoplasm {ECO:0000256|RuleBase:RU003304}. Nucleus {ECO:0000256|RuleBase:RU003304}.
L0EQ89	TP53	Inferred from homology	GO:0006915; GO:0007049; GO:0005737; GO:0046872; GO:0005634; GO:0003700; GO:0044212; GO:0006351		SUBCELLULAR LOCATION: Cytoplasm {ECO:0000256|RuleBase:RU003304}. Nucleus {ECO:0000256|RuleBase:RU003304}.
L0EQ92	TP53	Inferred from homology	GO:0006915; GO:0007049; GO:0005737; GO:0046872; GO:0005634; GO:0003700; GO:0044212; GO:0006351		SUBCELLULAR LOCATION: Cytoplasm {ECO:0000256|RuleBase:RU003304}. Nucleus {ECO:0000256|RuleBase:RU003304}.
L0EQJ1	TP53	Inferred from homology	GO:0006915; GO:0007049; GO:0005737; GO:0046872; GO:0005634; GO:0003700; GO:0044212; GO:0006351		SUBCELLULAR LOCATION: Cytoplasm {ECO:0000256|RuleBase:RU003304}. Nucleus {ECO:0000256|RuleBase:RU003304}.
L0EQP1	TP53	Inferred from homology	GO:0006915; GO:0007049; GO:0005737; GO:0046872; GO:0005634; GO:0003700; GO:0044212; GO:0006351		SUBCELLULAR LOCATION: Cytoplasm {ECO:0000256|RuleBase:RU003304}. Nucleus {ECO:0000256|RuleBase:RU003304}.
L0EQP9	TP53	Inferred from homology	GO:0006915; GO:0007049; GO:0005737; GO:0046872; GO:0005634; GO:0003700; GO:0044212; GO:0006351		SUBCELLULAR LOCATION: Cytoplasm {ECO:0000256|RuleBase:RU003304}. Nucleus {ECO:0000256|RuleBase:RU003304}.
L0EQQ9	TP53	Inferred from homology	GO:0006915; GO:0007049; GO:0005737; GO:0046872; GO:0005634; GO:0003700; GO:0044212; GO:0006351		SUBCELLULAR LOCATION: Cytoplasm {ECO:0000256|RuleBase:RU003304}. Nucleus {ECO:0000256|RuleBase:RU003304}.
L0EQS1	TP53	Inferred from homology	GO:0006915; GO:0007049; GO:0005737; GO:0046872; GO:0005634; GO:0003700; GO:0044212; GO:0006351		SUBCELLULAR LOCATION: Cytoplasm {ECO:0000256|RuleBase:RU003304}. Nucleus {ECO:0000256|RuleBase:RU003304}.
L0EQT1	TP53	Inferred from homology	GO:0006915; GO:0007049; GO:0005737; GO:0046872; GO:0005634; GO:0003700; GO:0044212; GO:0006351		SUBCELLULAR LOCATION: Cytoplasm {ECO:0000256|RuleBase:RU003304}. Nucleus {ECO:0000256|RuleBase:RU003304}.
L0EQU5	TP53	Inferred from homology	GO:0006915; GO:0007049; GO:0005737; GO:0046872; GO:0005634; GO:0003700; GO:0044212; GO:0006351		SUBCELLULAR LOCATION: Cytoplasm {ECO:0000256|RuleBase:RU003304}. Nucleus {ECO:0000256|RuleBase:RU003304}.
L0EQV3	TP53	Inferred from homology	GO:0006915; GO:0007049; GO:0005737; GO:0046872; GO:0005634; GO:0003700; GO:0044212; GO:0006351		SUBCELLULAR LOCATION: Cytoplasm {ECO:0000256|RuleBase:RU003304}. Nucleus {ECO:0000256|RuleBase:RU003304}.
L0EQX3	TP53	Inferred from homology	GO:0006915; GO:0007049; GO:0005737; GO:0046872; GO:0005634; GO:0003700; GO:0044212; GO:0006351		SUBCELLULAR LOCATION: Cytoplasm {ECO:0000256|RuleBase:RU003304}. Nucleus {ECO:0000256|RuleBase:RU003304}.
L0EQX9	TP53	Inferred from homology	GO:0006915; GO:0007049; GO:0005737; GO:0046872; GO:0005634; GO:0003700; GO:0044212; GO:0006351		SUBCELLULAR LOCATION: Cytoplasm {ECO:0000256|RuleBase:RU003304}. Nucleus {ECO:0000256|RuleBase:RU003304}.
L0EQY4	TP53	Inferred from homology	GO:0006915; GO:0007049; GO:0005737; GO:0046872; GO:0005634; GO:0003700; GO:0044212; GO:0006351		SUBCELLULAR LOCATION: Cytoplasm {ECO:0000256|RuleBase:RU003304}. Nucleus {ECO:0000256|RuleBase:RU003304}.
L0ERB4	TP53	Inferred from homology	GO:0006915; GO:0007049; GO:0005737; GO:0046872; GO:0005634; GO:0003700; GO:0044212; GO:0006351		SUBCELLULAR LOCATION: Cytoplasm {ECO:0000256|RuleBase:RU003304}. Nucleus {ECO:0000256|RuleBase:RU003304}.
L0ERI9	TP53	Inferred from homology	GO:0006915; GO:0007049; GO:0005737; GO:0046872; GO:0005634; GO:0003700; GO:0044212; GO:0006351		SUBCELLULAR LOCATION: Cytoplasm {ECO:0000256|RuleBase:RU003304}. Nucleus {ECO:0000256|RuleBase:RU003304}.
L0ERJ3	TP53	Inferred from homology	GO:0006915; GO:0007049; GO:0005737; GO:0046872; GO:0005634; GO:0003700; GO:0044212; GO:0006351		SUBCELLULAR LOCATION: Cytoplasm {ECO:0000256|RuleBase:RU003304}. Nucleus {ECO:0000256|RuleBase:RU003304}.
L0ERK8	TP53	Inferred from homology	GO:0006915; GO:0007049; GO:0005737; GO:0046872; GO:0005634; GO:0003700; GO:0044212; GO:0006351		SUBCELLULAR LOCATION: Cytoplasm {ECO:0000256|RuleBase:RU003304}. Nucleus {ECO:0000256|RuleBase:RU003304}.
L0ERL2	TP53	Inferred from homology	GO:0006915; GO:0007049; GO:0005737; GO:0046872; GO:0005634; GO:0003700; GO:0044212; GO:0006351		SUBCELLULAR LOCATION: Cytoplasm {ECO:0000256|RuleBase:RU003304}. Nucleus {ECO:0000256|RuleBase:RU003304}.
L0ERS6	TP53	Inferred from homology	GO:0006915; GO:0007049; GO:0005737; GO:0046872; GO:0005634; GO:0003700; GO:0044212; GO:0006351		SUBCELLULAR LOCATION: Cytoplasm {ECO:0000256|RuleBase:RU003304}. Nucleus {ECO:0000256|RuleBase:RU003304}.
L0ES92	TP53	Inferred from homology	GO:0006915; GO:0007049; GO:0005737; GO:0046872; GO:0005634; GO:0003700; GO:0044212; GO:0006351		SUBCELLULAR LOCATION: Cytoplasm {ECO:0000256|RuleBase:RU003304}. Nucleus {ECO:0000256|RuleBase:RU003304}.
L0R4T3	ABCF2	Inferred from homology	GO:0003677; GO:0000786; GO:0005634		SUBCELLULAR LOCATION: Chromosome {ECO:0000256|SAAS:SAAS00565666}.; SUBCELLULAR LOCATION: Nucleus {ECO:0000256|RuleBase:RU000451, ECO:0000256|SAAS:SAAS00566189}.
L7RTI5	PRKCE	Inferred from homology	GO:0005524; GO:0005794; GO:0035669; GO:0004699; GO:0007155; GO:0007049; GO:0051301; GO:0071361; GO:0071456; GO:0071380; GO:0005856; GO:0005829; GO:0035276; GO:0035556; GO:0031663; GO:0035641; GO:0002281; GO:0046872; GO:0005739; GO:0031397; GO:0005634; GO:0048471; GO:0005886; GO:0043123; GO:0043410; GO:0030838; GO:0010811; GO:0010763; GO:0032024; GO:0050996; GO:0070257; GO:0032230; GO:0030546; GO:…		SUBCELLULAR LOCATION: Cytoplasm {ECO:0000256|PIRNR:PIRNR000551}. Cytoplasm, cytoskeleton {ECO:0000256|PIRNR:PIRNR000551}. Cell membrane {ECO:0000256|PIRNR:PIRNR000551}. Cytoplasm, perinuclear region {ECO:0000256|PIRNR:PIRNR000551}. Nucleus {ECO:0000256|PIRNR:PIRNR000551}. Note=Translocated to plasma membrane in epithelial cells stimulated by HGF. Associated with the Golgi at the perinuclear site …
L8B196	UbC	Predicted	GO:0005737		SUBCELLULAR LOCATION: Cytoplasm {ECO:0000256|SAAS:SAAS00544534}.
L8B4I8	UbC	Predicted	GO:0005737		SUBCELLULAR LOCATION: Cytoplasm {ECO:0000256|SAAS:SAAS00544534}.
L8B4J3	UbC	Predicted	GO:0005737		SUBCELLULAR LOCATION: Cytoplasm {ECO:0000256|SAAS:SAAS00544534}.
L8B4M0	UbC	Predicted	GO:0005737		SUBCELLULAR LOCATION: Cytoplasm {ECO:0000256|SAAS:SAAS00544534}.
L8B4R0	UbC	Predicted	GO:0005737		SUBCELLULAR LOCATION: Cytoplasm {ECO:0000256|SAAS:SAAS00544534}.
L8B4Z6	UbC	Predicted	GO:0005737		SUBCELLULAR LOCATION: Cytoplasm {ECO:0000256|SAAS:SAAS00544534}.
M0QXI6	RUVBL2	Evidence at protein level	GO:0005524; GO:0043141; GO:0006310; GO:0006281; GO:0005634; GO:0006355; GO:0006351		SUBCELLULAR LOCATION: Nucleus {ECO:0000256|RuleBase:RU363048}.
M0QYE6	NR1H2	Evidence at protein level	GO:0005634; GO:0043565; GO:0043401; GO:0003700; GO:0006351; GO:0008270		SUBCELLULAR LOCATION: Nucleus {ECO:0000256|SAAS:SAAS00586772}.
M0QZD4	PEG3	Evidence at protein level	GO:0046872; GO:0003676; GO:0005634; GO:0003700; GO:0006351		SUBCELLULAR LOCATION: Nucleus {ECO:0000256|SAAS:SAAS00535819}.
M0QZF5	NR1H2	Evidence at protein level	GO:0005634; GO:0043565; GO:0003700; GO:0006351; GO:0008270		SUBCELLULAR LOCATION: Nucleus {ECO:0000256|SAAS:SAAS00586772}.
M0R043	GINS2	Evidence at protein level	GO:0006260; GO:0005634		SUBCELLULAR LOCATION: Nucleus {ECO:0000256|SAAS:SAAS00542169}.
M0R0K3	NR1H2	Evidence at protein level	GO:0005634; GO:0043565; GO:0003707; GO:0003700; GO:0006351; GO:0008270		SUBCELLULAR LOCATION: Nucleus {ECO:0000256|SAAS:SAAS00595767}.
M0R0Y3	RUVBL2	Evidence at protein level	GO:0005524; GO:0043141; GO:0006310; GO:0006281; GO:0005737; GO:0005654; GO:0006355; GO:0006351		SUBCELLULAR LOCATION: Nucleus {ECO:0000256|RuleBase:RU363048, ECO:0000256|SAAS:SAAS00339597}.
M0R0Z0	RUVBL2	Evidence at protein level	GO:0005524; GO:0043141; GO:0006310; GO:0006281; GO:0005634; GO:0006355; GO:0006351		SUBCELLULAR LOCATION: Nucleus {ECO:0000256|RuleBase:RU363048}.
M0R167	ZNF541	Predicted	GO:0003677; GO:0046872; GO:0005634		SUBCELLULAR LOCATION: Nucleus {ECO:0000256|SAAS:SAAS00548613}.
M0R175	NR2F6	Evidence at protein level	GO:0003677; GO:0004879; GO:0005634; GO:0003707; GO:0006351		SUBCELLULAR LOCATION: Nucleus {ECO:0000256|SAAS:SAAS00595767}.
M0R1I6	POU2F2	Evidence at protein level	GO:0005634; GO:0006355; GO:0043565		SUBCELLULAR LOCATION: Nucleus {ECO:0000256|RuleBase:RU000682, ECO:0000256|SAAS:SAAS00553137}.
M0R1V8	NR1H2	Evidence at protein level	GO:0005634; GO:0043565; GO:0043401; GO:0003700; GO:0006351; GO:0008270		SUBCELLULAR LOCATION: Nucleus {ECO:0000256|SAAS:SAAS00586772}.
M0R202	ZNF446	Evidence at protein level	GO:0046872; GO:0003676; GO:0005634; GO:0003700; GO:0006351		SUBCELLULAR LOCATION: Nucleus {ECO:0000256|SAAS:SAAS00574784}.
M0R229	NR1H2	Evidence at protein level	GO:0005634; GO:0043565; GO:0003700; GO:0006351; GO:0008270		SUBCELLULAR LOCATION: Nucleus {ECO:0000256|SAAS:SAAS00586772}.
M0R2F9	NR1H2	Evidence at protein level	GO:0005634; GO:0043565; GO:0003707; GO:0003700; GO:0006351; GO:0008270		SUBCELLULAR LOCATION: Nucleus {ECO:0000256|SAAS:SAAS00595767}.
M0R3H8	NA	Inferred from homology	GO:0000981; GO:0030154; GO:0000166; GO:0005634; GO:0006357; GO:0043565		SUBCELLULAR LOCATION: Nucleus {ECO:0000256|SAAS:SAAS00594387}.
M1S623	POU5F1	Evidence at transcript level	GO:0005634; GO:0043565; GO:0003700; GO:0006351		SUBCELLULAR LOCATION: Nucleus {ECO:0000256|RuleBase:RU361194, ECO:0000256|SAAS:SAAS00553137}.
O00110	OVOL3	Inferred from homology	GO:0000981; GO:0046872; GO:0003676; GO:0005634; GO:0006366		SUBCELLULAR LOCATION: Nucleus {ECO:0000305}.
O00139	KIF2A	Evidence at protein level	GO:0005524; GO:0016887; GO:0019886; GO:0030154; GO:0051301; GO:0005813; GO:0005829; GO:0005871; GO:0016020; GO:0005874; GO:0003777; GO:0007018; GO:0090307; GO:0007052; GO:0003774; GO:0007399; GO:0005730; GO:0005634; GO:0006890; GO:0007062; GO:0097228; GO:0000922		SUBCELLULAR LOCATION: Cytoplasm {ECO:0000250}. Cytoplasm, cytoskeleton, microtubule organizing center, centrosome. Cytoplasm, cytoskeleton, spindle pole. Cytoplasm, cytoskeleton, spindle. Note=Localized to the spindle microtubules and spindle poles from prophase to metaphase. Efficient targeting to spindle microtubules and spindle poles requires the kinase activity of PLK1. Recruited to mitotic s…
O00141	SGK1	Evidence at protein level	GO:0005524; GO:0006915; GO:0005246; GO:0006974; GO:0006883; GO:0017081; GO:0048037; GO:0005737; GO:0005829; GO:0005789; GO:0043402; GO:0035556; GO:0034220; GO:0007616; GO:0007019; GO:0005739; GO:0043066; GO:0031115; GO:0043005; GO:0048812; GO:0005654; GO:0005634; GO:0018105; GO:0048471; GO:0005886; GO:0030307; GO:0050775; GO:0010765; GO:0032411; GO:0015459; GO:0006468; GO:0004674; GO:0004712; GO:…		SUBCELLULAR LOCATION: Cytoplasm. Nucleus. Endoplasmic reticulum membrane. Cell membrane. Mitochondrion. Note=The subcellular localization is controlled by the cell cycle, as well as by exposure to specific hormones and environmental stress stimuli. In proliferating cells, it shuttles between the nucleus and cytoplasm in synchrony with the cell cycle, and in serum/growth factor-stimulated cells it…
O00148	DDX39A	Evidence at protein level	GO:0005524; GO:0004004; GO:0016887; GO:0006405; GO:0010501; GO:0006974; GO:0005737; GO:0031124; GO:0006406; GO:0000398; GO:0016020; GO:0005654; GO:0005634; GO:0044822; GO:0010468; GO:0005681; GO:0006369		SUBCELLULAR LOCATION: Nucleus {ECO:0000269|PubMed:21859714}. Cytoplasm {ECO:0000269|PubMed:21859714}. Note=Can translocate to the cytoplasm in the presence of MX1.
O00151	PDLIM1	Evidence at protein level	GO:0005737; GO:0005856; GO:0005925; GO:0006355; GO:0001666; GO:0006979; GO:0003713; GO:0005667; GO:0008270		SUBCELLULAR LOCATION: Cytoplasm {ECO:0000250}. Cytoplasm, cytoskeleton {ECO:0000250}. Note=Associates with the actin stress fibers. {ECO:0000250}.
O00154	ACOT7	Evidence at protein level	GO:0047617; GO:0052689; GO:0015937; GO:0005737; GO:0005829; GO:0070062; GO:0000062; GO:0036042; GO:0035338; GO:0036116; GO:0051792; GO:0036114; GO:0005739; GO:0005654; GO:1900535; GO:0016290; GO:0042803		SUBCELLULAR LOCATION: Isoform 4: Cytoplasm.; SUBCELLULAR LOCATION: Isoform 6: Cytoplasm.; SUBCELLULAR LOCATION: Isoform 1: Mitochondrion.; SUBCELLULAR LOCATION: Isoform 5: Mitochondrion.
O00159	MYO1C	Evidence at protein level	GO:0005524; GO:0038096; GO:0017160; GO:0030898; GO:0009925; GO:0005903; GO:0005737; GO:0016023; GO:0005829; GO:0070062; GO:0031941; GO:0016328; GO:0051028; GO:0016020; GO:0045121; GO:0005902; GO:0003774; GO:0045160; GO:0005643; GO:0005730; GO:0005654; GO:0005886; GO:0030335; GO:0038089; GO:0045815; GO:0090314; GO:1900748; GO:0006605; GO:0006612; GO:0005102; GO:2000810; GO:0001726; GO:0060171; GO:…		SUBCELLULAR LOCATION: Isoform 1: Cytoplasm {ECO:0000269|PubMed:22736583}. Nucleus {ECO:0000269|PubMed:22736583}. Note=Colocalizes with RNA polymerase II. Absent from nucleoli and does not colocalize with RNA polymerase I. Translocates to nuclear speckles upon exposure to inhibitors of RNA polymerase II transcription.; SUBCELLULAR LOCATION: Isoform 2: Cytoplasm. Cell membrane {ECO:0000250}; Periph…
O00165	HAX1	Evidence at protein level	GO:0015629; GO:0071345; GO:0016023; GO:0005783; GO:0019966; GO:0030027; GO:0005758; GO:0005741; GO:0005739; GO:0043066; GO:0005635; GO:0031965; GO:2000251; GO:0030854; GO:0033138; GO:0050731; GO:0014068; GO:0051897; GO:0045944; GO:0047485; GO:0030833; GO:0042981; GO:1903146; GO:1903214; GO:0016529; GO:0005667		SUBCELLULAR LOCATION: Mitochondrion. Endoplasmic reticulum. Nucleus membrane. Cytoplasmic vesicle {ECO:0000250}. Sarcoplasmic reticulum {ECO:0000250}.
O00167	EYA2	Evidence at protein level	GO:0006281; GO:0097192; GO:0016576; GO:0000287; GO:0007501; GO:0097345; GO:0005739; GO:0005654; GO:0004725; GO:0006355; GO:0014706; GO:0006351		SUBCELLULAR LOCATION: Cytoplasm {ECO:0000269|PubMed:10906137, ECO:0000269|PubMed:12500905}. Nucleus {ECO:0000269|PubMed:10906137, ECO:0000269|PubMed:12500905, ECO:0000269|PubMed:19497856}. Note=Retained in the cytoplasm via interaction with GNAZ and GNAI2 (PubMed:10906137). Interaction with SIX1, SIX2, SIX4 or SIX5 is required for translocation to the nucleus (PubMed:10906137, PubMed:12500905). {…
O00170	AIP	Evidence at protein level	GO:0036004; GO:0034751; GO:0005737; GO:0005829; GO:0016020; GO:0051344; GO:0005654; GO:0022417; GO:0006626; GO:0010738; GO:0004871; GO:0003713; GO:0008134; GO:0051082; GO:0006805		SUBCELLULAR LOCATION: Cytoplasm.
O00178	GTPBP1	Evidence at protein level	GO:0005525; GO:0003924; GO:0000177; GO:0005829; GO:0006955; GO:0005622; GO:0016020; GO:0044822; GO:0061014; GO:0007165; GO:0003746; GO:0006414		SUBCELLULAR LOCATION: Cytoplasm {ECO:0000250}.
O00186	STXBP3	Evidence at protein level	GO:0016324; GO:0016323; GO:0007420; GO:0005829; GO:0070062; GO:0015758; GO:0030073; GO:0045955; GO:0043312; GO:0005886; GO:0070527; GO:0031091; GO:0051291; GO:0022615; GO:0032868; GO:0042581; GO:0019905; GO:0070820; GO:0006904		SUBCELLULAR LOCATION: Cytoplasm, cytosol {ECO:0000269|PubMed:10194441}. Cell membrane {ECO:0000269|PubMed:10194441}. Note=In platelets, predominantly cytosolic. Low amounts membrane-associated.
O00204	SULT2B1	Evidence at protein level	GO:0050427; GO:0004027; GO:0005737; GO:0005829; GO:0005783; GO:0070062; GO:0043231; GO:0005634; GO:0008202; GO:0050294; GO:0000103		SUBCELLULAR LOCATION: Cytoplasm. Microsome. Nucleus. Note=Phosphorylation of Ser-348 is required for translocation to the nucleus.
O00213	APBB1	Evidence at protein level	GO:0006915; GO:0007409; GO:0001540; GO:0007050; GO:0006974; GO:0003682; GO:0005737; GO:0043197; GO:0006302; GO:0030426; GO:1990812; GO:1990761; GO:0043967; GO:0042393; GO:0030027; GO:0044304; GO:0030308; GO:0050760; GO:0043025; GO:0016607; GO:0005654; GO:0005634; GO:0048471; GO:0005886; GO:0045739; GO:0043065; GO:0010976; GO:0050714; GO:0045944; GO:0045893; GO:0045211; GO:0042734; GO:0070064; GO:…		SUBCELLULAR LOCATION: Cell membrane. Cytoplasm. Nucleus. Cell projection, growth cone {ECO:0000250}. Nucleus speckle. Note=Colocalizes with TSHZ3 in axonal growth cone (By similarity). In normal conditions, it mainly localizes to the cytoplasm, while a small fraction is tethered to the cell membrane via its interaction with APP. Following exposure to DNA damaging agents, it is released from cell …
O00221	NFKBIE	Evidence at protein level	GO:0042942; GO:0005794; GO:0005737; GO:0042994; GO:0005829; GO:0048471		SUBCELLULAR LOCATION: Cytoplasm {ECO:0000250}.
O00231	PSMD11	Evidence at protein level	GO:0038095; GO:0000165; GO:0038061; GO:0050852; GO:0060071; GO:0031145; GO:0002479; GO:0005829; GO:0070062; GO:0016020; GO:0090090; GO:0051436; GO:0005654; GO:0005634; GO:0090263; GO:0051437; GO:0022624; GO:0043248; GO:0000502; GO:0005838; GO:0043161; GO:0000209; GO:0006521; GO:0043488; GO:0048863; GO:0002223; GO:0033209; GO:0006511		SUBCELLULAR LOCATION: Nucleus {ECO:0000250}. Cytoplasm, cytosol {ECO:0000250}.
O00255	MEN1	Evidence at protein level	GO:0006281; GO:0000165; GO:0070412; GO:0000403; GO:1904837; GO:0007420; GO:0006974; GO:0071333; GO:0071375; GO:0000785; GO:0003682; GO:0032154; GO:0005737; GO:0005829; GO:0046697; GO:0003690; GO:0000400; GO:0034968; GO:0035097; GO:0000278; GO:0046329; GO:0045786; GO:1902807; GO:0008285; GO:0010812; GO:0045736; GO:0050680; GO:0045668; GO:0001933; GO:0043433; GO:0051974; GO:0000122; GO:0045892; GO:…		SUBCELLULAR LOCATION: Nucleus {ECO:0000269|PubMed:12874027}. Note=Concentrated in nuclear body-like structures. Relocates to the nuclear matrix upon gamma irradiation.
O00267	SUPT5H	Evidence at protein level	GO:0006370; GO:0006354; GO:0032044; GO:0007049; GO:0006338; GO:0019899; GO:0032785; GO:1900364; GO:0000122; GO:0005654; GO:0005634; GO:0044822; GO:0032786; GO:0016239; GO:0045944; GO:0050434; GO:0046982; GO:0010033; GO:0039692; GO:0006368; GO:0006366		SUBCELLULAR LOCATION: Nucleus {ECO:0000269|PubMed:10075709}.
[truncated: 7,780 more rows]
