# Supplementary material for: Comprehensive Identification and Characterization of Human Secretome Based on Integrative Proteomic and Transcriptomic Data
Source: Front Cell Dev Biol. 2019 Nov 21;7:299. doi: 10.3389/fcell.2019.00299 (PMC6881247; doi:10.3389/fcell.2019.00299)
Supplement: Supplementary file 3 [file Table_3.XLSX]

## Sheet: Supplementary Table 3
Supplementary Table 3: Tissues and cell types for the MS experimental conditions
Adipose	Esophagus	Macrophages	Prostate
Adrenal gland	Fibroblasts	Mitochondria	Rectum
B cells	Frontal cortex	Monocytes	Red blood cells
Blood vessel	Gall bladder	Muscle	Retina
Brain	Gut	Nerve	Saliva
Breast	Hair	NK cells	Semen
Cartilage	Heart	Ovary	Spinal cord
CD4 T cells	Joint	Pancreas	Stem cells
CD8 T cells	Kidney	Peripheral blood	Testis
Cerebrospinal Fluid	Liver	Placenta	Urinary bladder
Cervix	Lung	Plasma	Urine
Colon	Lymphocytes	Platelets	Vagina
