# Supplementary material for: Comprehensive Identification and Characterization of Human Secretome Based on Integrative Proteomic and Transcriptomic Data
Source: Front Cell Dev Biol. 2019 Nov 21;7:299. doi: 10.3389/fcell.2019.00299 (PMC6881247; doi:10.3389/fcell.2019.00299)
Supplement: Supplementary file 4 [file Table_4.XLSX]

## Sheet: Supplementary Table 4
Supplementary Table 4: SPs detected in ProteomicsDB
Defined ID	Gene Symbol	Swiss-Prot ID	TrEMBL ID	Detected in Tissues/Cells	Number of Tissues/Cells
STREA_000052	ACP5	P13686	A0A024R7F8	B cells;Prostate	2
STREA_000147	ANGPTL2	Q9UKU9	A0A024R868	Gall bladder;Ovary;Prostate;Urinary bladder	4
STREA_000176	APOA1	P02647	A0A024R3E3	Adrenal gland;Brain;CD4+ Tcells;Colon;Esophagus;Frontal cortex;Gall bladder;Gut;Heart;Kidney;Liver;Lung;Monocytes;Ovary;Pancreas;Placenta;Platelets;Prostate;Rectum;Retina;Spinal cord;Testis;Urinary bladder	23
STREA_000181	APOC3	P02656	A3KPE2	Adrenal gland;B cells;CD4+ Tcells;CD8+ Tcells;Colon;Esophagus;Frontal cortex;Gut;Heart;Kidney;Liver;Lung;Monocytes;NK cells;Ovary;Pancreas;Placenta;Platelets;Prostate;Rectum;Retina;Spinal cord;Testis;Urinary bladder	24
STREA_000182	APOE	P02649	A0A0S2Z3D5	Adrenal gland;Colon;Frontal cortex;Gall bladder;Heart;Kidney;Liver;Lung;Monocytes;Ovary;Pancreas;Placenta;Platelets;Prostate;Retina;Spinal cord;Testis;Urinary bladder	18
STREA_000451	C3;HEL-S-62p	P01024	V9HWA9	Adrenal gland;B cells;Brain;CD4+ Tcells;Colon;Esophagus;Frontal cortex;Gall bladder;Gut;Heart;Kidney;Liver;Lung;Monocytes;Ovary;Pancreas;Placenta;Platelets;Prostate;Rectum;Retina;Spinal cord;Testis;Urinary bladder	24
STREA_000457	C3orf39;POMGNT2	Q8NAT1	A0A024R2P4	Brain;Frontal cortex;Heart;Ovary;Retina;Testis	6
STREA_000506	CALR;HEL-S-99n	P27797	V9HW88	Adrenal gland;Brain;Liver;Ovary;Placenta	5
STREA_000555	CCK	P06307	Q6FG82	Frontal cortex;Gut	2
STREA_000563	CCL5	P13501	D0EI67	Platelets	1
STREA_000654	CHI3L1	P36222	A0A024R969	Liver;Monocytes	2
STREA_000726	COL6A3	P12111	D9ZGF2	Gall bladder;Ovary;Prostate;Testis;Urinary bladder	5
STREA_000787	CST3;HEL-S-2	P01034	A0A0K0K1J1	Adrenal gland;B cells;Brain;Colon;Frontal cortex;Gall bladder;Gut;Heart;Liver;Lung;Monocytes;Ovary;Pancreas;Prostate;Rectum;Retina;Spinal cord;Testis;Urinary bladder	19
STREA_000808	CXCL13	O43927	Q53X90	Lung;Prostate;Testis	3
STREA_000846	DCN	P07585	Q6FH10	Adrenal gland;Colon;Esophagus;Gall bladder;Gut;Heart;Kidney;Liver;Lung;Ovary;Pancreas;Placenta;Prostate;Rectum;Spinal cord;Testis;Urinary bladder	17
STREA_000847	DCN	P07585-3	A0A024RBG6	Placenta	1
STREA_000866	DEFA3	P59666	Q6EZE9	Platelets	1
STREA_000909	DNAJB9	Q9UBS3	Q6FIF1	Liver;Testis	2
STREA_000966	ECD;P4HA1	P13674-2	Q5VSQ6	Gut;Heart;Liver;Ovary;Testis	5
STREA_001045	ERP29;HEL-S-107	P30040	V9HW71	Adrenal gland;B cells;Brain;CD4+ Tcells;CD8+ Tcells;Colon;Esophagus;Frontal cortex;Gall bladder;Gut;Heart;Kidney;Liver;Lung;Monocytes;NK cells;Ovary;Pancreas;Placenta;Platelets;Prostate;Rectum;Retina;Spinal cord;Testis;Urinary bladder	26
STREA_001127	FBLN5	Q9UBX5	A0A024R6G3	Adrenal gland;Colon;Gall bladder;Gut;Lung;Ovary;Prostate;Rectum;Testis;Urinary bladder	10
STREA_001153	FGB;HEL-S-78p	P02675	V9HVY1	Adrenal gland;B cells;Brain;Colon;Esophagus;Frontal cortex;Gall bladder;Gut;Heart;Kidney;Liver;Lung;Monocytes;NK cells;Ovary;Pancreas;Placenta;Platelets;Prostate;Rectum;Retina;Spinal cord;Testis;Urinary bladder	24
STREA_001163	FKBP14	Q9NWM8	A0A090N7V8	Testis	1
STREA_001178	FMOD	Q06828	A0A024R971	Colon;Gall bladder;Prostate;Testis	4
STREA_001269	CSH1;CSH2;CSHL1;GH1;GH2	P0DML2	A8K6C2	Gut;Heart;Placenta	3
STREA_001407	HAPLN1	P10915	A0A024RAK9	Colon;Frontal cortex;Gut;Heart;Placenta;Rectum;Spinal cord	7
STREA_001408	HAPLN3	Q96S86	A0A024RC58	Frontal cortex	1
STREA_001462	HLA-DPB1	P04440	I4EC15	Lung;Pancreas	2
STREA_001514	HEL-S-89n;HSPA5	P11021	V9HWB4	Adrenal gland;B cells;Brain;CD4+ Tcells;CD8+ Tcells;Colon;Esophagus;Frontal cortex;Gall bladder;Gut;Heart;Kidney;Liver;Lung;Monocytes;NK cells;Ovary;Pancreas;Placenta;Platelets;Prostate;Rectum;Retina;Spinal cord;Testis;Urinary bladder	26
STREA_001705	LAMB3	Q13751	A0A0S2Z3R6	Gut;Heart;Lung;Prostate	4
STREA_001713	LCN1	P31025	A0A024R8D7	Retina	1
STREA_001718	LEFTY2	O00292	A0A024R3P5	Pancreas	1
STREA_001789	LYZ	P61626	B2R4C5	Liver;Monocytes;NK cells;Ovary;Prostate	5
STREA_001873	MGP	P08493	A0A024RAX0	Adrenal gland;Colon;Gall bladder;Heart;Kidney;Lung;Ovary;Pancreas;Prostate;Rectum;Spinal cord;Testis;Urinary bladder	13
STREA_001887	MMP2	P08253	A0A024R6R4	Pancreas	1
STREA_002125	NTS	P30990	Q6FH20	Gut	1
STREA_002157	OGN	P20774	A8K0R3	Adrenal gland;Brain;Colon;Esophagus;Gall bladder;Gut;Heart;Kidney;Liver;Lung;NK cells;Ovary;Pancreas;Placenta;Prostate;Rectum;Spinal cord;Testis;Urinary bladder	19
STREA_002162	OLFM4	Q6UX06	A0A024QZ95	Colon;Liver;Lung;Pancreas;Prostate;Rectum	6
STREA_002255	ERP70;PDIA4	P13667	A0A090N8Y2	Adrenal gland;B cells;Brain;CD4+ Tcells;CD8+ Tcells;Colon;Esophagus;Frontal cortex;Gall bladder;Gut;Heart;Kidney;Liver;Lung;Monocytes;NK cells;Ovary;Pancreas;Placenta;Platelets;Prostate;Rectum;Retina;Spinal cord;Testis;Urinary bladder	26
STREA_002266	PENK	P01210	A0A024R7V4	Brain;Testis	2
STREA_002340	PLOD1	Q02809	A0A024R4H0	Adrenal gland;Gut;Ovary;Testis	4
STREA_002370	POSTN	Q15063	A0A024RDS2	Gut;Heart;Lung;Ovary;Testis	5
STREA_002416	PRCP	P42785	A0A024R5L0	B cells;Brain;CD4+ Tcells;CD8+ Tcells;Frontal cortex;Gut;Heart;Kidney;NK cells;Ovary;Prostate;Rectum;Retina;Spinal cord;Testis	15
STREA_002454	PSAP	P07602	A0A024QZQ2	Monocytes	1
STREA_002481	LCNL1;PTGDS	P41222	A0A024R8G3	Frontal cortex;Gall bladder;Gut;Heart;Kidney;Ovary;Pancreas;Prostate;Retina;Spinal cord;Testis;Urinary bladder	12
STREA_002585	REG1B	P48304	Q6ICS1	Pancreas	1
STREA_002586	PAP;REG3A	Q06141	Q53S56	Pancreas	1
STREA_002587	REG4	Q9BYZ8	A0A024R0M1	Colon;Gut;Rectum	3
STREA_002633	RNASE6	Q93091	Q6IB39	Gall bladder	1
STREA_002735	SDF2	Q99470	Q6IBU4	B cells;Brain;Gut;Heart;Ovary;Placenta;Platelets;Retina;Testis	9
STREA_002766	SERPINA1	P01009	E9KL23	Adrenal gland;Brain;Colon;Esophagus;Frontal cortex;Gall bladder;Gut;Heart;Kidney;Liver;Lung;Ovary;Pancreas;Placenta;Platelets;Prostate;Rectum;Retina;Spinal cord;Testis;Urinary bladder	21
STREA_002767	SERPINA3;SERPINA4;SERPINA5	P29622	A0A024R6I9	Gut;Rectum	2
STREA_002768	SERPINA3;SERPINA4;SERPINA5	P01011	A0A024R6P0	Adrenal gland;B cells;CD8+ Tcells;Colon;Esophagus;Frontal cortex;Gall bladder;Gut;Heart;Kidney;Liver;Lung;Monocytes;NK cells;Ovary;Pancreas;Placenta;Platelets;Prostate;Rectum;Retina;Spinal cord;Testis;Urinary bladder	24
STREA_002777	SERPING1	P05155	E9KL26	Gall bladder;Ovary;Pancreas;Prostate;Testis;Urinary bladder	6
STREA_002778	SERPINH1	P50454	A0A024R5K8	Adrenal gland;Brain;CD4+ Tcells;CD8+ Tcells;Colon;Esophagus;Gall bladder;Gut;Heart;Kidney;Liver;Lung;Ovary;Pancreas;Placenta;Platelets;Prostate;Rectum;Retina;Spinal cord;Testis;Urinary bladder	22
STREA_002779	SERPINI1	Q99574	A0A0S2Z455	Brain;Frontal cortex;Ovary;Pancreas;Prostate;Retina;Testis	7
STREA_002796	SGCA	Q16586-2	A0A0S2Z4P8	Heart	1
STREA_002950	SPARCL1	Q14515	A0A024RDE1	Colon;Frontal cortex;Lung;Prostate;Urinary bladder	5
STREA_002973	SPP1	P10451-5	A0A024RDE6	Gall bladder	1
STREA_003057	TAC3	Q9UHF0-3	A0A024RB97	Retina;Urinary bladder	2
STREA_003111	TGFBI	Q15582	A0A0S2Z4Q2	Adrenal gland;Colon;Gall bladder;Gut;Heart;Kidney;Liver;Lung;Ovary;Pancreas;Placenta;Prostate;Rectum;Spinal cord;Testis;Urinary bladder	16
STREA_003151	TICAM2;TMED7;TMED7-TICAM2	Q9Y3B3-2	A0A0A6YYA0	Gut;Heart;Liver	3
STREA_003235	TPST2	O60704	A0A024R1G9	CD8+ Tcells;Pancreas;Platelets	3
STREA_003296	TTR	P02766	E9KL36	Adrenal gland;Brain;CD4+ Tcells;Colon;Esophagus;Gut;Heart;Kidney;Liver;Lung;Monocytes;Pancreas;Placenta;Platelets;Prostate;Rectum;Retina;Spinal cord;Urinary bladder	19
STREA_003407	SEBOX;VTN	P04004	D9ZGG2	Adrenal gland;Colon;Esophagus;Gall bladder;Gut;Heart;Kidney;Liver;Lung;Monocytes;Ovary;Pancreas;Placenta;Platelets;Prostate;Rectum;Retina;Spinal cord;Testis;Urinary bladder	20
STREX_003617	CSPG3;NCAN	O14594	A0A024R7M3	Brain;Frontal cortex	2
STREX_003659	ARSB	P15848	A0A024RAJ9	Kidney;Liver;Retina;Testis	4
STREX_003684	CRH	P06850	A0A0S2Z478	Brain;Frontal cortex	2
STREX_003718	MELTF;MFI2	P08582-2	Q53XS6	Gut;Retina	2
STREX_003727	GREM1	O60565	A6XAA7	Colon;Gall bladder;Pancreas;Prostate;Rectum	5
STREX_003814	ANG;RAA1	P03950	W0UV28	Adrenal gland;Colon;Gall bladder;Heart;Kidney;Liver;Lung;Ovary;Prostate;Rectum;Spinal cord;Testis;Urinary bladder	13
STREX_004003	RAB1;RNASE4	P34096	Q53XB4	Adrenal gland;Colon;Frontal cortex;Gall bladder;Gut;Heart;Kidney;Lung;Ovary;Pancreas;Prostate;Rectum;Retina;Spinal cord;Testis;Urinary bladder	16
STRXX_025527	CP	P00450	A5PL27	Lung	1
STXEX_025613	SPP1	P10451-4	F2YQ21	Frontal cortex	1
STXXX_044779	TGFB1	P01137	A0A024R0P8	CD4+ Tcells;CD8+ Tcells;Pancreas	3
STXXX_044782	HEL-S-153w;ORM1	P02763	V9HWF6	Esophagus;Frontal cortex;Gut;Heart;Kidney;Lung;Monocytes;Placenta;Platelets;Urinary bladder	10
STXXX_044783	GC;HEL-S-51	P02774	V9HWI6	Adrenal gland;Gall bladder;Gut;Ovary;Testis	5
STXXX_044845	MFGE8	Q08431-3	A0A024RC59	Heart;Kidney;Ovary;Pancreas;Prostate;Retina;Testis	7
SXREA_004395	ACHE	P22303	NA	Retina	1
SXREA_004429	ACR	P10323	NA	Testis	1
SXREA_004430	ACRBP;LPAR5	Q8NEB7	NA	Testis	1
SXREA_004507	ADAM12	O43184-2	NA	Frontal cortex	1
SXREA_004627	AEBP1	Q8IUX7	NA	Gall bladder;Ovary;Pancreas;Prostate;Testis;Urinary bladder	6
SXREA_004670	AGR3	Q8TD06	NA	Colon;Prostate	2
SXREA_004767	ALB	P02768	NA	Heart;Kidney;Liver;Prostate;Spinal cord;Testis;Urinary bladder	7
SXREA_004877	AMY1A;AMY1B;AMY1C	P04745	NA	Gall bladder;Pancreas;Rectum	3
SXREA_004878	AMY2A	P04746	NA	Gall bladder	1
SXREA_005102	APOD	P05090	NA	Adrenal gland;Brain;CD8+ Tcells;Colon;Esophagus;Frontal cortex;Gall bladder;Gut;Heart;Kidney;Liver;Lung;Monocytes;NK cells;Ovary;Pancreas;Placenta;Platelets;Prostate;Rectum;Retina;Spinal cord;Testis;Urinary bladder	24
SXREA_005601	AZGP1;GJC3	P25311	NA	Adrenal gland;CD8+ Tcells;Colon;Esophagus;Gall bladder;Heart;Kidney;Liver;Lung;Monocytes;NK cells;Ovary;Pancreas;Prostate;Rectum;Retina;Spinal cord;Testis;Urinary bladder	19
SXREA_005606	AZU1	P20160	NA	CD4+ Tcells;Gut;Kidney;Lung;Monocytes;Prostate	6
SXREA_006282	MYDGF	Q969H8	NA	Adrenal gland;B cells;Brain;CD8+ Tcells;Colon;Frontal cortex;Gall bladder;Gut;Heart;Kidney;Liver;Monocytes;Ovary;Pancreas;Placenta;Platelets;Prostate;Rectum;Retina;Spinal cord;Testis;Urinary bladder	22
SXREA_006311	SMIM24	O75264	NA	Adrenal gland;Gut;Kidney	3
SXREA_006425	C1QTNF4	Q9BXJ3	NA	Brain;Frontal cortex	2
SXREA_006565	PRADC1	Q9BSG0	NA	Adrenal gland	1
SXREA_006639	C5	P01031	NA	Adrenal gland;Colon;Esophagus;Gall bladder;Gut;Heart;Kidney;Liver;Monocytes;Ovary;Pancreas;Placenta;Prostate;Rectum;Spinal cord;Testis;Urinary bladder	17
SXREA_006660	C5orf46;SPINK1	P00995	NA	Gall bladder;Gut;Pancreas;Urinary bladder	4
SXREA_006771	C8A	P07357	NA	Adrenal gland;Colon;Esophagus;Gall bladder;Kidney;Liver;Lung;Monocytes;Ovary;Pancreas;Prostate;Rectum;Spinal cord;Testis;Urinary bladder	15
SXREA_007056	CARTPT	Q16568	NA	Adrenal gland	1
SXREA_007093	CASQ1	P31415	NA	Esophagus	1
SXREA_007117	CBLN1	P23435	NA	Brain	1
SXREA_007438	CD300A	Q9UGN4-4	NA	CD4+ Tcells;Monocytes;NK cells	3
SXREA_007479	CD55	P08174-2	NA	Adrenal gland;Lung;Ovary;Rectum;Testis	5
SXREA_007571	CDH13	P55290-3	NA	Colon;Frontal cortex;Gall bladder;Gut;Heart;Lung;Ovary;Pancreas;Prostate;Rectum;Testis;Urinary bladder	12
SXREA_007672	CELA3A;CELA3B	P08861	NA	Rectum	1
SXREA_007673	CELA3A;CELA3B	P09093	NA	Gut;Pancreas;Rectum	3
SXREA_007752	CFHR1;CFHR3	Q02985-2	NA	Gall bladder	1
SXREA_007767	CHAD	O15335	NA	Monocytes;NK cells	2
SXREA_007804	CHGA	P10645	NA	Adrenal gland;Brain;Colon;Frontal cortex;Gut;Pancreas;Prostate;Rectum;Testis	9
SXREA_007812	CHID1	Q9BWS9-3	NA	Adrenal gland;B cells;Brain;CD4+ Tcells;CD8+ Tcells;Frontal cortex;Gall bladder;Gut;Heart;Kidney;Liver;Lung;NK cells;Ovary;Pancreas;Placenta;Platelets;Prostate;Rectum;Retina;Testis;Urinary bladder	22
SXREA_008061	CLUL1	Q15846	NA	Retina	1
SXREA_008137	CNPY4	Q8N129	NA	Adrenal gland;Brain;Placenta	3
SXREA_008186	COL2A1	P02458-1	NA	Liver	1
SXREA_008195	COL6A3	P12111-2	NA	Adrenal gland;Colon;Esophagus;Gut;Heart;Kidney;Liver;Lung;Pancreas;Placenta;Rectum;Spinal cord	12
SXREA_008198	COL6A3	P12111-3	NA	Brain;Frontal cortex;Monocytes;Retina	4
SXREA_008281	CPB1	P15086	NA	Brain;CD4+ Tcells;Gall bladder;Gut;Pancreas;Placenta	6
SXREA_008283	CPD	O75976	NA	Brain;Frontal cortex;Gut;Heart;Liver;Ovary;Pancreas;Platelets;Prostate;Retina;Testis	11
SXREA_008296	CPN1	P15169	NA	Gall bladder;Kidney;Liver;Monocytes;Ovary;Prostate;Spinal cord;Testis;Urinary bladder	9
SXREA_008297	CPN2	P22792	NA	Adrenal gland;Colon;Esophagus;Gall bladder;Kidney;Liver;Lung;Monocytes;Ovary;Prostate;Rectum;Testis;Urinary bladder	13
SXREA_008350	CREG1	O75629	NA	Adrenal gland;Esophagus;Gut;Kidney;Liver;Lung;Monocytes;Ovary;Placenta;Testis	10
SXREA_008461	CST1;CST4	P01036	NA	Adrenal gland	1
SXREA_008462	CST2	P09228	NA	Adrenal gland	1
SXREA_008464	CST6	Q15828	NA	Gall bladder	1
SXREA_008522	CTRB2	Q6GPI1	NA	Pancreas	1
SXREA_008523	CTRC	Q99895	NA	Gut;Pancreas	2
SXREA_008526	CTSE	P14091-1	NA	Lung	1
SXREA_008528	CTSF	Q9UBX1	NA	Prostate	1
SXREA_008529	CTSG	P08311	NA	Adrenal gland;B cells;CD4+ Tcells;CD8+ Tcells;Colon;Esophagus;Frontal cortex;Gall bladder;Heart;Kidney;Liver;Lung;Monocytes;NK cells;Ovary;Pancreas;Placenta;Platelets;Prostate;Rectum;Spinal cord;Testis;Urinary bladder	23
SXREA_008532	CTSO	P43234	NA	CD8+ Tcells;NK cells	2
SXREA_008535	CTSZ	Q9UBR2	NA	Adrenal gland;B cells;CD4+ Tcells;CD8+ Tcells;Colon;Frontal cortex;Gall bladder;Gut;Heart;Kidney;Liver;Lung;Monocytes;NK cells;Ovary;Pancreas;Placenta;Platelets;Prostate;Rectum;Retina;Spinal cord;Testis;Urinary bladder	24
SXREA_008564	CXADR	P78310-5	NA	Brain;Liver	2
SXREA_008567	CXCL12	P48061-2	NA	Ovary;Spinal cord;Testis	3
SXREA_008569	CXCL17	Q6UXB2	NA	Lung	1
SXREA_008767	DCD	P81605	NA	Adrenal gland;B cells;Brain;CD8+ Tcells;Colon;Frontal cortex;Gall bladder;Gut;Heart;Kidney;Liver;Lung;NK cells;Ovary;Pancreas;Placenta;Platelets;Prostate;Rectum;Retina;Spinal cord;Testis;Urinary bladder	23
SXREA_008885	DEFA1;DEFA1B;DEFA3	P59665	NA	Testis	1
SXREA_008886	DEFA5	Q01523	NA	Prostate	1
SXREA_008887	DEFA6	Q01524	NA	Gut;Prostate	2
SXREA_009004	DHRS7C	A6NNS2-2	NA	Esophagus;Heart	2
SXREA_009134	DNAJB11	Q9UBS4	NA	Adrenal gland;B cells;Brain;CD4+ Tcells;CD8+ Tcells;Colon;Gall bladder;Gut;Heart;Liver;Lung;Monocytes;NK cells;Ovary;Pancreas;Placenta;Platelets;Prostate;Rectum;Retina;Testis;Urinary bladder	22
SXREA_009254	DPT	Q07507	NA	Adrenal gland;Colon;Esophagus;Gall bladder;Gut;Heart;Kidney;Liver;Lung;Ovary;Pancreas;Placenta;Prostate;Rectum;Testis;Urinary bladder	16
SXREA_009418	ECD;P4HA1	P13674	NA	Colon;Heart;Placenta;Prostate;Retina;Testis	6
SXREA_009419	ECD;P4HA1	P13674-3	NA	Adrenal gland;Colon;Gall bladder;Pancreas;Placenta;Prostate;Retina;Spinal cord	8
SXREA_009526	EGFR	P00533-4	NA	Brain;Frontal cortex;Gall bladder;Gut;Liver;Ovary;Placenta;Prostate;Retina;Spinal cord;Testis;Urinary bladder	12
SXREA_009527	EGFR	P00533-2	NA	Adrenal gland;Colon;Esophagus;Heart;Lung	5
SXREA_009642	EMILIN2	Q9BXX0	NA	Colon;Heart;Liver;Ovary;Pancreas;Placenta;Prostate;Spinal cord;Testis;Urinary bladder	10
SXREA_009643	EMILIN3	Q9NT22	NA	Gut;Heart;Ovary;Prostate;Spinal cord;Testis	6
SXREA_009667	ENDOU	P21128-3	NA	Esophagus;Placenta	2
SXREA_009777	EPX	P11678	NA	B cells;CD4+ Tcells;Colon;Liver;Lung;Platelets;Prostate;Rectum	8
SXREA_009779	ERAP1	Q9NZ08-2	NA	Adrenal gland;Spinal cord	2
SXREA_009780	ERAP1	Q9NZ08	NA	Adrenal gland;CD4+ Tcells;CD8+ Tcells;Colon;Gut;Liver;Lung;Monocytes;NK cells;Ovary;Platelets;Prostate;Rectum;Retina;Testis	15
SXREA_009819	ERN1	O75460	NA	Adrenal gland;CD8+ Tcells	2
SXREA_009822	ERP27	Q96DN0	NA	Gut;Liver;Pancreas	3
SXREA_010378	FCER1G	P30273	NA	Adrenal gland;B cells;CD8+ Tcells;Colon;Kidney;Liver;Lung;Monocytes;NK cells;Ovary;Pancreas;Placenta;Platelets;Retina;Spinal cord;Testis;Urinary bladder	17
SXREA_010392	FCN1	O00602	NA	B cells;CD4+ Tcells;CD8+ Tcells;Monocytes;NK cells;Platelets;Prostate	7
SXREA_010453	FGA	P02671	NA	Gall bladder;Gut;Urinary bladder	3
SXREA_010454	FGA	P02671-2	NA	Adrenal gland;B cells;Brain;CD8+ Tcells;Colon;Esophagus;Frontal cortex;Heart;Kidney;Liver;Lung;Monocytes;NK cells;Ovary;Pancreas;Placenta;Platelets;Prostate;Rectum;Retina;Spinal cord;Testis	22
SXREA_010500	FGG	P02679-2	NA	Adrenal gland;CD8+ Tcells;Colon;Esophagus;Frontal cortex;Gall bladder;Gut;Heart;Kidney;Liver;Lung;Monocytes;NK cells;Ovary;Pancreas;Placenta;Platelets;Prostate;Rectum;Retina;Spinal cord;Testis;Urinary bladder	23
SXREA_010548	FKBP7	Q9Y680-3	NA	Gut;Heart;Liver;Ovary;Placenta;Prostate;Testis;Urinary bladder	8
SXREA_010715	FSTL5	Q8N475-3	NA	Retina	1
SXREA_010725	FUCA1	P04066	NA	Adrenal gland;CD4+ Tcells;CD8+ Tcells;Colon;Gall bladder;Heart;Kidney;Liver;NK cells;Ovary;Placenta;Prostate;Rectum;Retina;Spinal cord;Testis	16
SXREA_010726	FUCA2	Q9BTY2	NA	Adrenal gland;Gut;Heart;Kidney;Liver;Ovary;Placenta;Testis	8
SXREA_010741	FXYD1;FXYD7	O00168	NA	Adrenal gland;Colon;Esophagus;Frontal cortex;Gall bladder;Gut;Heart;Liver;Lung;Ovary;Pancreas;Placenta;Prostate;Rectum;Retina;Spinal cord;Testis;Urinary bladder	18
SXREA_010746	FXYD3	Q14802	NA	Colon;Gall bladder;Lung;Prostate;Rectum	5
SXREA_010967	GGH	Q92820	NA	Adrenal gland;B cells;CD4+ Tcells;CD8+ Tcells;Colon;Frontal cortex;Heart;Liver;NK cells;Ovary;Pancreas;Prostate;Retina;Testis	14
SXREA_010980	GHDC	Q8N2G8-2	NA	Adrenal gland;B cells;Brain;CD8+ Tcells;Kidney;Liver;Monocytes;NK cells;Ovary;Prostate;Retina;Spinal cord;Testis;Urinary bladder	14
SXREA_011080	GM2A	P17900	NA	Adrenal gland;B cells;CD4+ Tcells;CD8+ Tcells;Colon;Esophagus;Frontal cortex;Gut;Heart;Kidney;Liver;Lung;Monocytes;NK cells;Ovary;Pancreas;Placenta;Prostate;Rectum;Retina;Spinal cord;Testis;Urinary bladder	23
SXREA_011298	GPX7	Q96SL4	NA	Brain;Esophagus;Gut;Heart;Liver;NK cells;Ovary;Placenta;Testis	9
SXREA_011397	GSN	P06396	NA	Adrenal gland;Colon;Frontal cortex;Gall bladder;Gut;Heart;Kidney;Lung;Ovary;Pancreas;Platelets;Prostate;Rectum;Retina;Spinal cord;Testis;Urinary bladder	17
SXREA_011483	GUSB	P08236-3	NA	Adrenal gland;CD8+ Tcells;Colon;Kidney;Lung;Monocytes;NK cells;Ovary;Pancreas;Platelets;Prostate;Rectum;Spinal cord;Testis	14
SXREA_011509	H6PD	O95479	NA	Adrenal gland;B cells;Brain;CD4+ Tcells;CD8+ Tcells;Colon;Esophagus;Gall bladder;Gut;Heart;Kidney;Liver;Lung;Monocytes;NK cells;Ovary;Pancreas;Placenta;Prostate;Rectum;Retina;Spinal cord;Testis;Urinary bladder	24
SXREA_011534	HAPLN2	Q9GZV7	NA	Spinal cord	1
SXREA_011646	HGF	P14210-3	NA	Adrenal gland	1
SXREA_011880	HRG	P04196	NA	Adrenal gland;Brain;Colon;Esophagus;Gall bladder;Heart;Kidney;Liver;Lung;Monocytes;Placenta;Platelets;Spinal cord;Urinary bladder	14
SXREA_011976	HTRA3	P83110	NA	Testis	1
SXREA_011977	HTRA3	P83110-2	NA	NK cells;Testis	2
SXREA_012107	IGFBP6	P24592	NA	Gall bladder;Lung;Ovary;Pancreas;Prostate;Rectum;Spinal cord;Testis	8
SXREA_012307	INHA	P05111	NA	Ovary;Testis	2
SXREA_012309	INHBC	P55103	NA	Liver	1
SXREA_012310	INHBE	P58166	NA	Adrenal gland;Gall bladder;Liver;Ovary	4
SXREA_012345	INSL3	P51460	NA	Testis	1
SXREA_012347	INSL5	Q9Y5Q6	NA	Rectum	1
SXREA_012461	ITGA2B	P08514	NA	B cells;CD8+ Tcells;Heart;Liver;Lung;Monocytes;NK cells;Placenta;Platelets	9
SXREA_012479	ITGB4	P16144-3	NA	Pancreas;Placenta;Prostate;Spinal cord;Urinary bladder	5
SXREA_012717	KDELC1	Q6UW63	NA	Heart	1
SXREA_012745	EMC1	Q8N766-4	NA	Adrenal gland;B cells;CD4+ Tcells;CD8+ Tcells;Colon;Esophagus;Frontal cortex;Gall bladder;Gut;Heart;Kidney;Liver;Lung;Monocytes;NK cells;Placenta;Platelets;Prostate;Rectum;Retina;Urinary bladder	21
SXREA_013031	KLK8;KLK9	O60259-3	NA	NK cells	1
SXREA_013158	LAMB1	P07942	NA	Adrenal gland;Brain;Colon;Esophagus;Gall bladder;Gut;Heart;Kidney;Liver;Lung;Ovary;Pancreas;Placenta;Platelets;Prostate;Rectum;Spinal cord;Testis;Urinary bladder	19
SXREA_013217	LCN2	P80188	NA	Esophagus;Gall bladder;Gut;Pancreas;Platelets;Prostate;Rectum	7
SXREA_013369	LIPF	P07098-2	NA	Colon	1
SXREA_013466	LOXL1	Q08397	NA	Gall bladder	1
SXREA_013508	LRG1;PLIN5	P02750	NA	Adrenal gland;Colon;Gall bladder;Kidney;Lung;Monocytes;Ovary;Prostate;Rectum;Spinal cord;Testis;Urinary bladder	12
SXREA_013523	LRPAP1	P30533	NA	Kidney;Spinal cord;Testis	3
SXREA_013637	LUM	P51884	NA	Adrenal gland;Colon;Esophagus;Gall bladder;Gut;Heart;Kidney;Liver;Lung;Monocytes;Ovary;Pancreas;Placenta;Prostate;Rectum;Spinal cord;Testis;Urinary bladder	18
SXREA_013765	MANBA	O00462	NA	CD8+ Tcells	1
SXREA_014057	CALR3;CHERP;MED26;SLC35E1	Q96L12	NA	Ovary;Testis	2
SXREA_014135	METTL7B	Q6UX53	NA	Adrenal gland;Gall bladder;Gut;Kidney;Liver;Pancreas;Rectum;Retina;Spinal cord;Testis	10
SXREA_014186	MZB1	Q8WU39	NA	B cells;Colon;Lung;NK cells;Pancreas;Prostate;Rectum	7
SXREA_014311	MMP3	P08254	NA	Monocytes	1
SXREA_014314	MMP9	P14780	NA	Gall bladder;Liver;Lung;Platelets;Rectum	5
SXREA_014617	MTTP	P55157	NA	Gut;Liver;Ovary;Prostate;Testis	5
SXREA_015274	NOX5;SPESP1	Q6UW49	NA	Testis	1
SXREA_015316	NPTX1	Q15818	NA	Brain;Frontal cortex	2
SXREA_015381	NRXN3	Q9HDB5-2	NA	Frontal cortex	1
SXREA_015420	NTRK2	Q16620-3	NA	Brain;Frontal cortex	2
SXREA_015424	NUCB1	Q02818	NA	Adrenal gland;B cells;CD4+ Tcells;CD8+ Tcells;Colon;Gut;Heart;Kidney;Liver;Lung;Monocytes;NK cells;Ovary;Prostate;Rectum;Retina;Spinal cord;Testis;Urinary bladder	19
SXREA_015943	OS9	Q13438	NA	Liver;Testis	2
SXREA_015944	OS9	Q13438-4	NA	Liver;Ovary;Pancreas;Testis	4
SXREA_015947	OS9	Q13438-3	NA	B cells;Liver;Prostate;Testis	4
SXREA_016115	PAM	P19021-4	NA	Heart;Pancreas	2
SXREA_016213	AGER;PBX2	Q15109-2	NA	Lung	1
SXREA_016454	PDIA5;SEC22A	Q14554	NA	Adrenal gland;CD8+ Tcells;Colon;Gut;Heart;Kidney;Liver;Lung;Monocytes;NK cells;Ovary;Pancreas;Placenta;Platelets;Prostate;Rectum;Testis	17
SXREA_016462	PDILT	Q8N807	NA	Testis	1
SXREA_016548	PF4	P02776	NA	Adrenal gland;B cells;Brain;CD8+ Tcells;Colon;Gall bladder;Heart;Kidney;Liver;Monocytes;NK cells;Pancreas;Platelets;Prostate;Spinal cord;Testis	16
SXREA_016579	PGC	P20142	NA	Esophagus;Lung;Pancreas;Prostate	4
SXREA_016583	PGLYRP1	O75594	NA	Platelets	1
SXREA_016585	PGLYRP2	Q96PD5	NA	Adrenal gland;Colon;Esophagus;Gall bladder;Kidney;Lung;Monocytes;Ovary;Prostate;Spinal cord;Testis;Urinary bladder	12
SXREA_016774	PIP	P12273	NA	Adrenal gland;NK cells;Prostate	3
SXREA_016854	PLBD1	Q6P4A8	NA	B cells;CD8+ Tcells;Colon;Esophagus;Heart;Kidney;Liver;Lung;Monocytes;NK cells;Pancreas;Placenta;Platelets;Prostate;Rectum;Testis;Urinary bladder	17
SXREA_016939	PLOD2	O00469	NA	Gut;Liver;Ovary	3
SXREA_016940	PLOD3	O60568	NA	Adrenal gland;Colon;Gut;Heart;Liver;Monocytes;Ovary;Placenta;Testis;Urinary bladder	10
SXREA_016955	PLTP	P55058-3	NA	Gall bladder;Prostate	2
SXREA_016994	PNLIP	P16233	NA	CD4+ Tcells;Gall bladder;Pancreas	3
SXREA_016995	PNLIPRP1	P54315	NA	Pancreas	1
SXREA_017026	PODXL2	Q9NZ53	NA	Brain	1
SXREA_017103	POSTN	Q15063-3	NA	Colon;Heart;Pancreas;Placenta;Prostate;Testis	6
SXREA_017147	PPBP	P02775	NA	CD8+ Tcells;NK cells;Platelets	3
SXREA_017305	PPT1	P50897	NA	Adrenal gland;Brain;CD4+ Tcells;CD8+ Tcells;Colon;Frontal cortex;Gall bladder;Gut;Heart;Kidney;Liver;Lung;Monocytes;NK cells;Ovary;Pancreas;Placenta;Prostate;Retina;Spinal cord;Testis;Urinary bladder	22
SXREA_017306	PPT1	P50897-2	NA	Adrenal gland;B cells;Brain;CD4+ Tcells;CD8+ Tcells;Colon;Frontal cortex;Gall bladder;Gut;Heart;Kidney;Liver;Lung;Monocytes;NK cells;Ovary;Pancreas;Placenta;Prostate;Rectum;Retina;Spinal cord;Testis;Urinary bladder	24
SXREA_017312	PPY	P01298	NA	Pancreas	1
SXREA_017355	PRELP	P51888	NA	Esophagus;Gall bladder;Kidney;Lung;Placenta;Rectum;Spinal cord;Urinary bladder	8
SXREA_017361	PRF1	P14222	NA	CD8+ Tcells;Monocytes;NK cells	3
SXREA_017362	PRG3	Q9Y2Y8	NA	Liver	1
SXREA_017393	PRKCSH	P14314-2	NA	Adrenal gland;B cells;Brain;CD4+ Tcells;CD8+ Tcells;Gut;Heart;Kidney;Liver;Lung;Monocytes;NK cells;Ovary;Pancreas;Platelets;Prostate;Rectum;Retina;Spinal cord;Testis;Urinary bladder	21
SXREA_017730	PTX3	P26022	NA	Adrenal gland;Brain;Colon;Gall bladder;Gut;Heart;Lung;Pancreas;Prostate;Rectum;Urinary bladder	11
SXREA_018128	RCN3	Q96D15	NA	Gall bladder;Gut;Heart;Liver;Lung;Ovary;Pancreas;Placenta;Testis	9
SXREA_018166	REG3G	Q6UW15	NA	Pancreas	1
SXREA_018195	RETSAT	Q6NUM9	NA	Adrenal gland;Colon;Liver;Lung;Rectum;Retina;Testis	7
SXREA_018355	RNASE3	P12724	NA	Liver	1
SXREA_018480	AMY2B	P19961	NA	Pancreas	1
SXREA_018788	SAA2;SAA4	P0DJI9	NA	Colon;Gall bladder;Liver;Lung;Ovary;Prostate;Rectum;Retina;Spinal cord;Testis;Urinary bladder	11
SXREA_018876	SCG2	P13521	NA	Adrenal gland;Brain;Pancreas	3
SXREA_018880	SCGB1D2	O95969	NA	NK cells	1
SXREA_018884	SCGB3A1	Q96QR1	NA	Gut	1
SXREA_019035	SEMG1;SEMG2	Q02383	NA	CD8+ Tcells;Ovary;Prostate	3
SXREA_019095	SERPINA11	Q86U17	NA	Liver	1
SXREA_019109	SERPIND1	P05546	NA	Adrenal gland;Colon;Esophagus;Gall bladder;Gut;Heart;Liver;Lung;Monocytes;Ovary;Prostate;Spinal cord;Testis;Urinary bladder	14
SXREA_019112	SERPINF1	P36955	NA	Adrenal gland;Colon;Esophagus;Frontal cortex;Gall bladder;Gut;Heart;Kidney;Liver;Lung;Monocytes;Ovary;Pancreas;Placenta;Prostate;Rectum;Retina;Spinal cord;Testis;Urinary bladder	20
SXREA_019113	SERPINI2	O75830	NA	Pancreas	1
SXREA_019281	SHISA7	A6NL88	NA	Frontal cortex	1
SXREA_019312	IL4I1;NUP62;SIGLEC11	Q96RQ9	NA	CD4+ Tcells;CD8+ Tcells;NK cells;Prostate;Retina;Testis	6
SXREA_019710	PRG2;SLC43A3	P13727-2	NA	B cells;CD4+ Tcells;Colon;Gut;Heart;Liver;Lung;NK cells;Placenta;Platelets;Prostate;Rectum;Testis	13
SXREA_019998	SOD3	P08294	NA	Adrenal gland;Colon;Esophagus;Frontal cortex;Gall bladder;Gut;Heart;Kidney;Liver;Lung;Monocytes;Ovary;Pancreas;Placenta;Prostate;Rectum;Retina;Spinal cord;Testis;Urinary bladder	20
SXREA_020165	C19orf33;SPINT2	O43291-2	NA	Ovary;Pancreas;Placenta;Testis	4
SXREA_020231	SRL	Q86TD4-2	NA	Heart	1
SXREA_020246	SRPX	P78539-3	NA	Heart;Ovary;Prostate;Rectum;Urinary bladder	5
SXREA_020247	SRPX	P78539-4	NA	Adrenal gland;Colon;Esophagus;Gall bladder;Gut;Lung;Pancreas;Spinal cord;Testis	9
SXREA_020288	SST	P61278	NA	Brain;Frontal cortex;Gut;Pancreas	4
SXREA_020653	TAC1	P20366-2	NA	Brain	1
SXREA_021032	THBS4	P35443	NA	Colon	1
SXREA_021510	TOR2A	Q8N2E6	NA	Ovary;Testis	2
SXREA_021806	PRSS58	Q8IYP2	NA	Ovary;Testis	2
SXREA_022127	UCN3	Q969E3	NA	Pancreas	1
SXREA_022480	VWA1	Q6PCB0	NA	Prostate;Urinary bladder	2
SXREX_025751	PCSK1N	Q9UHG2	NA	Adrenal gland;Brain;Colon;Frontal cortex;Gall bladder;Gut;Monocytes;Ovary;Pancreas;Prostate;Rectum;Retina;Spinal cord;Testis;Urinary bladder	15
SXREX_025777	EBI3	Q14213	NA	Placenta	1
SXREX_025920	SDF2L1	Q9HCN8	NA	Adrenal gland;B cells;CD4+ Tcells;CD8+ Tcells;Colon;Gall bladder;Gut;Kidney;Liver;Lung;Monocytes;NK cells;Ovary;Pancreas;Platelets;Rectum;Retina;Spinal cord;Testis;Urinary bladder	20
SXREX_025953	GDF15	Q99988	NA	Pancreas;Placenta;Prostate	3
SXREX_025990	CFHR5	Q9BXR6	NA	Gall bladder	1
SXREX_026137	LAMC2	Q13753	NA	Heart;Lung	2
SXREX_026175	TNC	P24821	NA	Brain;Colon;Frontal cortex;Liver;Prostate;Rectum	6
SXREX_026186	GAL	P22466	NA	Colon;Prostate;Rectum	3
SXREX_026472	FGF19	O95750	NA	Heart	1
SXREX_026473	PDZK1IP1	Q13113	NA	Kidney	1
SXREX_026501	FBLN2	P98095	NA	Gall bladder;Ovary;Testis	3
SXREX_026603	COL6A2	P12110	NA	Adrenal gland;Brain;Colon;Esophagus;Frontal cortex;Gall bladder;Gut;Heart;Kidney;Liver;Lung;Ovary;Pancreas;Placenta;Prostate;Rectum;Retina;Spinal cord;Testis;Urinary bladder	20
SXREX_026643	SMR3B	P02814	NA	Adrenal gland	1
SXREX_026784	CYP2W1	Q8TAV3	NA	Gut	1
SXREX_026822	COL6A2	P12110-3	NA	Adrenal gland;Brain;Colon;Esophagus;Frontal cortex;Gall bladder;Gut;Heart;Kidney;Liver;Lung;Ovary;Pancreas;Placenta;Prostate;Rectum;Retina;Spinal cord;Testis;Urinary bladder	20
SXREX_026936	LYNX1	Q9BZG9-3	NA	Esophagus	1
SXREX_027161	PAPPA	Q13219	NA	Gall bladder;Pancreas;Placenta	3
SXREX_027192	PSG3	Q16557	NA	Placenta	1
SXREX_027465	GH1	P01241-5	NA	Esophagus;Heart;Placenta	3
SXREX_027503	QPCT	Q16769	NA	Adrenal gland	1
SXREX_027619	HP	P00738	NA	Adrenal gland;Colon;Esophagus;Frontal cortex;Gall bladder;Heart;Kidney;Liver;Lung;Monocytes;Ovary;Pancreas;Placenta;Platelets;Prostate;Rectum;Retina;Spinal cord;Testis;Urinary bladder	20
SXREX_027664	GUCA2A	Q02747	NA	Gut	1
SXREX_027780	NFASC	O94856-3	NA	Frontal cortex	1
SXREX_027888	THBS2	P35442	NA	Gall bladder;Gut;Pancreas;Placenta	4
SXREX_028295	HSPG2	P98160	NA	Adrenal gland;Colon;Esophagus;Frontal cortex;Gall bladder;Gut;Heart;Kidney;Liver;Lung;Ovary;Pancreas;Prostate;Rectum;Spinal cord;Testis;Urinary bladder	17
SXREX_028443	CUBN	O60494	NA	Kidney	1
SXREX_028543	POSTN	Q15063-5	NA	Colon;Gut;Heart;Lung;Ovary;Pancreas;Prostate;Rectum;Testis	9
SXREX_028642	C1QTNF3	Q9BXJ4-3	NA	Retina	1
SXREX_028650	GZMH	P20718-2	NA	CD8+ Tcells;Lung;NK cells	3
SXREX_028852	FUT11	Q495W5-2	NA	Gut;Urinary bladder	2
SXREX_028874	IZUMO4	Q1ZYL8	NA	Testis	1
SXREX_028893	CXCL12	P48061-4	NA	B cells	1
SXREX_028975	COL6A2	P12110-2	NA	Adrenal gland;Colon;Esophagus;Gall bladder;Liver;Lung;Ovary;Pancreas;Prostate;Rectum;Spinal cord;Testis;Urinary bladder	13
SXREX_028998	HP	P00738-2	NA	Adrenal gland;Brain;Colon;Esophagus;Frontal cortex;Gall bladder;Gut;Heart;Kidney;Liver;Lung;Monocytes;Ovary;Pancreas;Placenta;Platelets;Prostate;Rectum;Retina;Spinal cord;Testis;Urinary bladder	22
SXREX_029074	CXADR	P78310-4	NA	Brain	1
SXREX_029327	OS9	Q13438-6	NA	B cells;CD8+ Tcells;Liver;Pancreas;Prostate;Testis	6
SXREX_029633	ACHE	P22303-3	NA	Retina	1
SXREX_029748	DMKN	Q6E0U4-7	NA	Esophagus	1
SXREX_029757	PTPRJ	Q12913-2	NA	Monocytes	1
SXREX_029956	SELT	P62341	NA	CD8+ Tcells;Colon;Ovary;Pancreas;Platelets;Prostate;Retina	7
SXREX_030132	NAAA	Q02083-2	NA	B cells;CD4+ Tcells;Monocytes;NK cells;Prostate	5
SXREX_030227	MPZ	P25189	NA	Spinal cord	1
SXREX_030320	MUC5B	Q9HC84	NA	Colon;Gall bladder;Pancreas;Rectum	4
SXREX_030377	FKBP9	O95302-3	NA	Placenta	1
SXREX_030482	TNC	P24821-6	NA	Adrenal gland;Esophagus;Gall bladder;Gut;Heart;Kidney;Liver;Lung;Ovary;Pancreas;Retina;Spinal cord;Testis	13
SXREX_030916	P3H3	Q8IVL6	NA	Gut;Heart;Ovary;Placenta;Testis	5
SXREX_031076	MUC5AC	P98088	NA	Lung	1
SXRXA_031134	ADAM12	O43184-3	NA	Placenta	1
SXRXA_031179	ATF6B;TNXB	P22105	NA	Adrenal gland;Colon;Esophagus;Gall bladder;Liver;Lung;Ovary;Pancreas;Testis;Urinary bladder	10
SXRXA_031589	PLA2G12B	Q9BX93-2	NA	Liver	1
SXRXA_031600	POSTN	Q15063-7	NA	Esophagus;Gall bladder;Liver;Placenta;Urinary bladder	5
SXRXX_044926	PSAP	P07602-2	NA	CD4+ Tcells;Monocytes	2
SXRXX_044940	GLB1	P16278-2	NA	Adrenal gland;CD4+ Tcells;CD8+ Tcells;Colon;Frontal cortex;Gut;Heart;Kidney;Liver;Lung;Monocytes;NK cells;Ovary;Pancreas;Placenta;Platelets;Prostate;Rectum;Retina;Testis;Urinary bladder	21
SXRXX_044953	NFASC	O94856-11	NA	Frontal cortex;Spinal cord	2
SXRXX_045150	MIA3	Q5JRA6-2	NA	Adrenal gland;B cells;CD8+ Tcells;Colon;Frontal cortex;Liver;Monocytes;Ovary;Pancreas;Placenta;Prostate;Testis	12
SXRXX_045236	COL6A5	A8TX70-2	NA	Lung	1
SXRXX_045292	GUSB	P08236-2	NA	Gut	1
SXRXX_045307	TNC	P24821-4	NA	Brain;Colon;Frontal cortex;Liver;Prostate;Rectum	6
SXRXX_045308	TNC	P24821-5	NA	Colon;Ovary;Pancreas;Spinal cord;Urinary bladder	5
SXRXX_045576	TNC	P24821-2	NA	Brain;Frontal cortex;Gall bladder;Gut;Liver;Prostate;Rectum	7
SXXEA_031825	A2M	P01023	NA	Adrenal gland;Brain;Colon;Frontal cortex;Gall bladder;Gut;Lung;Monocytes;Rectum;Retina;Spinal cord;Testis;Urinary bladder	13
SXXEA_031826	A2ML1	A8K2U0	NA	Esophagus	1
SXXEA_032196	CCDC47	Q96A33-2	NA	Adrenal gland;B cells;Brain;CD4+ Tcells;CD8+ Tcells;Colon;Esophagus;Frontal cortex;Gall bladder;Gut;Heart;Kidney;Liver;Lung;Monocytes;NK cells;Ovary;Pancreas;Placenta;Platelets;Prostate;Rectum;Retina;Spinal cord;Testis;Urinary bladder	26
SXXEA_032285	COL3A1	P02461	NA	Adrenal gland;Colon;Esophagus;Frontal cortex;Gall bladder;Gut;Heart;Kidney;Liver;Lung;Ovary;Pancreas;Placenta;Prostate;Rectum;Spinal cord;Testis;Urinary bladder	18
SXXEA_032307	CSF1R	P07333-2	NA	Colon;Gall bladder;Monocytes;Pancreas;Prostate;Rectum;Urinary bladder	7
SXXEA_032572	GABBR1;UBD	Q9UBS5-5	NA	Retina	1
SXXEA_032701	IDS	P22304-3	NA	CD8+ Tcells;NK cells	2
SXXEA_032875	LRP1	Q07954-2	NA	Retina	1
SXXEA_032903	MAGT1	Q9H0U3-2	NA	Adrenal gland;CD4+ Tcells;CD8+ Tcells;Colon;Gall bladder;Gut;Heart;Kidney;Liver;Lung;Monocytes;NK cells;Ovary;Pancreas;Placenta;Platelets;Prostate;Rectum;Retina;Testis;Urinary bladder	21
SXXEA_032918	MATN3	O15232-2	NA	Heart	1
SXXEA_033239	POFUT2	Q9Y2G5-2	NA	Adrenal gland;Liver;Ovary;Testis	4
SXXEA_033405	AMY2B;RNPC3	P19961-2	NA	Adrenal gland;Esophagus;Gall bladder;Rectum	4
SXXEA_033469	SERPINA1	P01009-2	NA	B cells;CD8+ Tcells;Monocytes;NK cells	4
SXXEA_033471	SERPINA3;SERPINA4;SERPINA5	P01011-2	NA	Gut;NK cells;Placenta;Platelets	4
SXXEA_033843	VWF	P04275	NA	Adrenal gland;Lung;Ovary;Platelets;Prostate;Rectum;Testis;Urinary bladder	8
SXXEX_045775	NPNT	Q6UXI9-2	NA	Gall bladder;Lung	2
SXXEX_045808	COL3A1	P02461-2	NA	Monocytes	1
SXXEX_045889	FBLN1	P23142-2	NA	Adrenal gland;Brain;Colon;Esophagus;Gall bladder;Gut;Heart;Kidney;Liver;Lung;Ovary;Pancreas;Placenta;Prostate;Rectum;Spinal cord;Testis;Urinary bladder	18
SXXEX_046041	UGT1A10	Q9HAW8-2	NA	Colon;Esophagus;Kidney	3
SXXEX_046210	SFTPB	P07988	NA	Lung	1
SXXEX_046263	COL18A1	P39060-2	NA	Urinary bladder	1
SXXEX_046289	NFASC	O94856-10	NA	Brain;Frontal cortex;Retina;Spinal cord	4
SXXEX_046298	LTBP1	Q14766	NA	Platelets	1
SXXEX_046429	LAMA2	P24043	NA	Testis	1
SXXEX_046594	IGKV1-5	P01602	NA	Adrenal gland;B cells;Colon;Esophagus;Gall bladder;Heart;Lung;Ovary;Prostate;Rectum;Retina;Spinal cord;Testis;Urinary bladder	14
SXXEX_046653	PDGFRA	P16234-2	NA	Gall bladder;Gut;Lung;Ovary;Pancreas;Prostate;Rectum;Testis;Urinary bladder	9
SXXEX_046879	PTPRO	Q16827-5	NA	Brain	1
SXXEX_047023	SPACA3	Q8IXA5-2	NA	Ovary;Testis	2
SXXEX_047061	CA4	P22748-2	NA	Adrenal gland;Colon;Frontal cortex;Gall bladder;Heart;Kidney;Lung;Pancreas;Prostate;Rectum	10
SXXEX_047215	ALB	P02768-3	NA	Adrenal gland;Gall bladder;Kidney;Pancreas;Testis	5
SXXXA_047283	ACE2	Q9BYF1-2	NA	Gall bladder	1
SXXXA_047657	CD84	Q9UIB8-6	NA	B cells;CD4+ Tcells;CD8+ Tcells;Monocytes;NK cells;Platelets;Rectum;Urinary bladder	8
SXXXA_047720	COL1A1	P02452	NA	Adrenal gland;Esophagus;Frontal cortex;Heart;Kidney;Liver;Lung	7
SXXXA_047850	EPHA1	P21709-3	NA	NK cells	1
SXXXA_047991	GHDC	Q8N2G8-3	NA	B cells;Ovary	2
SXXXA_048218	LCN2	P80188-2	NA	Colon;Kidney;Liver;Lung	4
SXXXA_048332	ZG16	O60844	NA	Prostate	1
SXXXA_048467	NUCB2	P80303-2	NA	Monocytes;Testis;Urinary bladder	3
SXXXA_048468	NUCB2	P80303	NA	Adrenal gland;CD4+ Tcells;Heart;Liver;Ovary;Pancreas;Placenta;Rectum;Retina	9
SXXXA_048594	PNLIPRP1	P54315-3	NA	Pancreas	1
SXXXA_049005	TPSAB1	Q15661-2	NA	Colon;Ovary;Prostate;Rectum;Urinary bladder	5
SXXXA_049056	UGGT1	Q9NYU2-2	NA	Adrenal gland;B cells;CD4+ Tcells;CD8+ Tcells;Colon;Esophagus;Frontal cortex;Gall bladder;Gut;Heart;Liver;NK cells;Ovary;Pancreas;Placenta;Prostate;Retina;Spinal cord;Testis	19
SXXXX_093411	NA	O00763-2	NA	Gall bladder	1
SXXXX_093492	NA	O15533-2	NA	B cells;CD4+ Tcells;CD8+ Tcells;NK cells;Platelets;Urinary bladder	6
SXXXX_093493	NA	O15533-4	NA	Adrenal gland;B cells;CD8+ Tcells;Colon;Liver;NK cells;Ovary;Platelets;Prostate;Rectum;Urinary bladder	11
SXXXX_093593	NA	O60656-2	NA	Kidney	1
SXXXX_093834	GH1	P01241-4	NA	Esophagus;Placenta	2
SXXXX_093950	ALB	P02768-2	NA	Adrenal gland;B cells;Brain;CD4+ Tcells;CD8+ Tcells;Colon;Esophagus;Frontal cortex;Gall bladder;Heart;Kidney;Liver;Lung;Monocytes;NK cells;Ovary;Pancreas;Placenta;Platelets;Prostate;Rectum;Retina;Spinal cord;Testis;Urinary bladder	25
SXXXX_093972	NA	P04207	NA	Colon;Esophagus;Gall bladder;Kidney;Lung;Prostate;Rectum;Spinal cord;Urinary bladder	9
SXXXX_093997	NA	P05067-2	NA	Testis	1
SXXXX_094015	NA	P06311	NA	Adrenal gland;Colon;Esophagus;Gall bladder;Gut;Heart;Kidney;Lung;Ovary;Placenta;Prostate;Rectum;Testis;Urinary bladder	14
SXXXX_094017	NA	P06314	NA	Urinary bladder	1
SXXXX_094024	APOA4	P06727	NA	Colon;Esophagus;Gall bladder;Gut;Heart;Kidney;Liver;Lung;Monocytes;Ovary;Pancreas;Placenta;Platelets;Prostate;Rectum;Retina;Spinal cord;Testis;Urinary bladder	19
SXXXX_094040	NA	P07996-2	NA	B cells;Spinal cord	2
SXXXX_094048	NA	P08514-3	NA	Monocytes	1
SXXXX_094053	NA	P08603-2	NA	Adrenal gland;Colon;Frontal cortex;Gall bladder;Liver;Lung;Ovary;Prostate;Testis;Urinary bladder	10
SXXXX_094054	NA	P08603	NA	Adrenal gland;Colon;Esophagus;Frontal cortex;Gall bladder;Gut;Heart;Kidney;Liver;Monocytes;Ovary;Pancreas;Platelets;Prostate;Rectum;Spinal cord;Testis;Urinary bladder	18
SXXXX_094061	NA	P09466-3	NA	Testis	1
SXXXX_094065	NA	P09619-2	NA	Lung;Ovary;Testis	3
SXXXX_094124	SAA1	P0DJI8	NA	Colon;Esophagus;Gall bladder;Heart;Kidney;Liver;Lung;Ovary;Prostate;Rectum;Spinal cord;Testis;Urinary bladder	13
SXXXX_094142	NA	P10619-2	NA	Adrenal gland;Gut;Kidney;Lung;NK cells;Ovary;Placenta;Platelets;Rectum	9
SXXXX_094144	NA	P10721-3	NA	Rectum	1
SXXXX_094185	ACE	P12821-2	NA	Gut;Kidney;Liver;Lung;Retina;Spinal cord;Testis;Urinary bladder	8
SXXXX_094253	ACAN	P16112-2	NA	Monocytes	1
SXXXX_094254	ACAN	P16112-3	NA	Prostate	1
SXXXX_094256	NA	P16144-4	NA	Colon;Esophagus;Gall bladder;Lung;Pancreas;Placenta;Prostate;Rectum;Retina;Spinal cord;Urinary bladder	11
SXXXX_094273	HLA-A	P16190	NA	CD8+ Tcells;Lung	2
SXXXX_094351	CEL	P19835	NA	Gut;Pancreas	2
SXXXX_094361	GZMH	P20718-3	NA	CD4+ Tcells;CD8+ Tcells;NK cells	3
SXXXX_094405	NA	P22303-4	NA	Retina	1
SXXXX_094439	NA	P24821-3	NA	Brain;Colon;Frontal cortex;Gall bladder;Liver;Prostate;Rectum;Spinal cord	8
SXXXX_094444	NA	P25189-2	NA	Spinal cord	1
SXXXX_094503	NA	P31431-2	NA	Colon;Liver;Lung;Ovary;Pancreas;Platelets;Prostate;Rectum;Retina;Spinal cord;Testis;Urinary bladder	12
SXXXX_094549	FBN2	P35556-2	NA	Liver;Ovary;Placenta	3
SXXXX_094737	PNLIPRP2	P54317	NA	Pancreas	1
SXXXX_094850	NA	P78509-3	NA	Adrenal gland	1
SXXXX_094907	NAAA	Q02083-3	NA	CD4+ Tcells;Colon;Liver;NK cells;Prostate	5
SXXXX_095043	NA	Q12794-4	NA	Liver	1
SXXXX_095126	NA	Q13477-2	NA	Gut	1
SXXXX_095267	NA	Q15109-5	NA	Heart;Lung	2
SXXXX_095374	NA	Q29960-2	NA	Adrenal gland;B cells;CD4+ Tcells;CD8+ Tcells;Lung;Monocytes;NK cells;Ovary;Platelets;Prostate;Rectum;Testis;Urinary bladder	13
SXXXX_095415	NA	Q2UY09-3	NA	Adrenal gland;Colon;Gall bladder;Heart;Prostate;Rectum;Spinal cord;Urinary bladder	8
SXXXX_095530	NA	Q58EX2-2	NA	B cells;Frontal cortex;Ovary;Retina	4
SXXXX_095697	LCN1P1	Q5VSP4	NA	Rectum	1
SXXXX_095821	NA	Q6E0U4-2	NA	Ovary	1
SXXXX_095865	NA	Q6NUM9-2	NA	CD8+ Tcells;Colon;Pancreas;Rectum	4
SXXXX_096056	NA	Q6ZMP0-2	NA	Gut;Ovary;Pancreas;Testis	4
SXXXX_096072	NA	Q6ZN44-2	NA	Frontal cortex;Retina	2
SXXXX_096370	NA	Q86TD4	NA	Heart	1
SXXXX_096423	NA	Q86UX2-2	NA	Colon;Ovary;Pancreas;Prostate;Rectum;Retina;Spinal cord;Testis;Urinary bladder	9
SXXXX_096638	CPAMD8	Q8IZJ3-2	NA	Spinal cord	1
SXXXX_096657	NA	Q8N126-3	NA	Brain;Pancreas;Prostate;Rectum;Retina;Urinary bladder	6
SXXXX_097501	PRAP1	Q96NZ9-2	NA	Liver;Monocytes	2
SXXXX_097533	NA	Q96PZ7-4	NA	Brain	1
SXXXX_097714	NA	Q9BUN1-2	NA	Ovary	1
SXXXX_097960	DPEP3	Q9H4B8	NA	Ovary;Testis	2
SXXXX_098035	NA	Q9HAW7-2	NA	Esophagus;Kidney;Liver	3
SXXXX_098036	NA	Q9HAW9-2	NA	Colon;Kidney	2
SXXXX_098277	STAB1	Q9NY15-2	NA	Adrenal gland;B cells;Colon;Gut;Heart;Liver;Lung;Monocytes;Ovary;Pancreas;Placenta;Testis	12
SXXXX_098501	NA	Q9UKY3	NA	Adrenal gland;B cells;CD8+ Tcells;Colon;Esophagus;Gall bladder;Gut;Heart;Liver;Lung;Monocytes;NK cells;Ovary;Pancreas;Prostate;Rectum;Retina;Spinal cord;Testis;Urinary bladder	20
SXXXX_098698	UGT2A1	Q9Y4X1	NA	Gut;Kidney	2
XTREA_023968	CFH	NA	A0A024R962	Lung	1
XTREA_023969	CFH	NA	A0A0D9SG88	Gut;Rectum	2
XTREA_024024	COL4A6	NA	F5H3Q5	Gall bladder	1
XTREA_024369	HP	NA	A0A0C4DGL8	Adrenal gland;Brain;Colon;Esophagus;Frontal cortex;Gall bladder;Gut;Heart;Kidney;Liver;Lung;Monocytes;Ovary;Pancreas;Placenta;Platelets;Prostate;Rectum;Retina;Spinal cord;Testis;Urinary bladder	22
XTREA_024551	MATN4	NA	A6NNA4	Heart	1
XTREA_024573	MFGE8	NA	X6R3G6	Spinal cord;Urinary bladder	2
XTREA_024878	PRKCSH	NA	K7ELL7	B cells;Brain;CD4+ Tcells;CD8+ Tcells;Liver;Monocytes;Platelets;Testis	8
XTREA_025002	SAA2;SAA2-SAA4;SAA4	NA	A0A096LPE2	Frontal cortex;Pancreas;Testis	3
XTREA_025182	TAPBP	NA	A0A0A0MT98	CD4+ Tcells;Testis	2
XTREX_034068	CHGA	NA	G5E968	Adrenal gland;Brain;Colon;Frontal cortex;Gut;Pancreas;Prostate;Rectum;Testis	9
XTREX_034082	TNC	NA	J3QSU6	Gall bladder;Pancreas;Spinal cord;Urinary bladder	4
XTREX_034359	ITIH5	NA	G5E9D8	Gall bladder	1
XTREX_034459	PTPRN2	NA	E7EM83	Frontal cortex	1
XTRXX_049295	opn;SPP1	NA	Q3LGB0	Frontal cortex;Gall bladder	2
XTRXX_049497	COL18A1	NA	D3DSM4	Adrenal gland;Colon;Esophagus;Frontal cortex;Gall bladder;Gut;Heart;Kidney;Liver;Lung;Ovary;Pancreas;Placenta;Prostate;Rectum;Retina;Spinal cord;Testis;Urinary bladder	19
XTRXX_049501	MUC19	NA	G3CIG0	B cells	1
XTXEA_036267	ACAN	NA	Q6PID9	Frontal cortex;Heart;Monocytes;Ovary;Pancreas;Spinal cord	6
XTXEA_036272	ACHE	NA	F8WD68	Retina	1
XTXEA_036296	ACP5	NA	K7EJD9	Gut;Liver;Lung;Rectum	4
XTXEA_036420	AHSG	NA	C9JV77	CD8+ Tcells;NK cells	2
XTXEA_036457	ALB	NA	B7WNR0	B cells	1
XTXEA_036595	APOE	NA	E9PEV4	Adrenal gland;Brain;Colon;Frontal cortex;Gall bladder;Gut;Heart;Kidney;Liver;Lung;Monocytes;Ovary;Pancreas;Placenta;Platelets;Prostate;Retina;Spinal cord;Testis;Urinary bladder	20
XTXEA_036696	ASAH1	NA	E7EMM4	B cells;CD8+ Tcells;Colon;Frontal cortex;Gall bladder;Gut;Heart;Liver;Lung;NK cells;Ovary;Platelets;Prostate;Retina;Spinal cord;Testis;Urinary bladder	17
XTXEA_036721	ATF6B;TNXB	NA	C9J7W4	Kidney	1
XTXEA_037194	C2;CFB	NA	B4E1Z4	Adrenal gland;Colon;Esophagus;Gall bladder;Gut;Heart;Kidney;Liver;Lung;Monocytes;Ovary;Pancreas;Prostate;Rectum;Spinal cord;Testis;Urinary bladder	17
XTXEA_037237	NDNF	NA	D6R972	Retina	1
XTXEA_037587	CDH10	NA	D6RJG0	Brain;Frontal cortex;Retina;Spinal cord	4
XTXEA_037628	CELA3A;CELA3B	NA	B1AQ52	Gut	1
XTXEA_037658	CFH	NA	Q5TFM2	Kidney;Platelets	2
XTXEA_037660	CFI	NA	D6R9Z8	Monocytes	1
XTXEA_037808	CNTN1	NA	F8VUI8	Brain	1
XTXEA_037825	COL16A1	NA	A6NCT7	Gall bladder;Gut;Ovary;Pancreas;Prostate;Testis;Urinary bladder	7
XTXEA_037892	CP	NA	E9PFZ2	Adrenal gland;Colon;Esophagus;Gall bladder;Heart;Liver;Lung;Monocytes;Ovary;Prostate;Rectum;Retina;Spinal cord;Testis;Urinary bladder	15
XTXEA_037942	CRTAP	NA	C9JP16	Platelets;Testis	2
XTXEA_038096	DCN	NA	F8VXZ8	Adrenal gland;Brain;Colon;Frontal cortex;Gall bladder;Gut;Heart;Kidney;Liver;Lung;Ovary;Pancreas;Placenta;Prostate;Rectum;Spinal cord;Testis;Urinary bladder	18
XTXEA_038121	DDR1	NA	E7EN94	Brain;Spinal cord	2
XTXEA_038361	DUOX1	NA	H0YK19	Lung	1
XTXEA_038526	C1S;EMG1	NA	C9IZP8	Liver;Prostate;Urinary bladder	3
XTXEA_038620	ERO1A;ERO1L	NA	G3V3E6	Adrenal gland;Urinary bladder	2
XTXEA_038808	FBN2	NA	D6RJI3	Colon;Gut;Heart;Testis	4
XTXEA_038888	FKBP7	NA	F8WE12	Gut;Heart;Ovary;Placenta;Testis	5
XTXEA_038889	FKBP7	NA	F8WCU2	Colon;Gut;Heart;Liver;Ovary;Placenta;Prostate;Rectum;Testis;Urinary bladder	10
XTXEA_038904	FLT4;VEGFR3	NA	B5A927	Kidney	1
XTXEA_039065	GC	NA	D6RBJ7	Frontal cortex;Platelets;Retina	3
XTXEA_039094	CSH1;CSH2;CSHL1;GH1;GH2	NA	B1A4H2	Heart;Liver;Placenta	3
XTXEA_039204	ADGRG6	NA	F5H2L1	Gall bladder;Gut;Liver	3
XTXEA_039213	ADGRG1	NA	H3BRH0	Brain;CD8+ Tcells;NK cells	3
XTXEA_039430	HLA-DPB1	NA	A0A0G2JII1	B cells;NK cells	2
XTXEA_039541	ICAM1	NA	K7EKL8	Adrenal gland;CD8+ Tcells	2
XTXEA_039581	IGK;IGKC;IGKV1-5;IGKV3-15	NA	A0A0B4J1T9	Adrenal gland;B cells;Colon;Gall bladder;Kidney;Lung;NK cells;Ovary;Pancreas;Prostate;Rectum;Spinal cord;Testis;Urinary bladder	14
XTXEA_039725	ISLR	NA	H0YN67	Colon;Gall bladder;Heart;Lung;Pancreas;Rectum	6
XTXEA_039748	ITGB7	NA	F5H6T4	B cells;CD4+ Tcells;CD8+ Tcells;NK cells	4
XTXEA_039749	ITGB7	NA	F8VNX4	CD4+ Tcells;CD8+ Tcells	2
XTXEA_039752	ITIH3	NA	E7ET33	Heart;Liver;Lung;Ovary;Prostate	5
XTXEA_039772	JMJD8	NA	H3BVG3	Kidney	1
XTXEA_039817	EMC1	NA	Q5TG59	Esophagus;Platelets;Rectum;Testis	4
XTXEA_040124	LRP2	NA	E9PC35	Placenta	1
XTXEA_040174	LY6K	NA	H0YB07	Ovary	1
XTXEA_040184	LYZ	NA	F8VV32	Colon;Monocytes;NK cells;Platelets	4
XTXEA_040209	MANBA	NA	E9PFW2	Adrenal gland;CD8+ Tcells;NK cells	3
XTXEA_040399	MMP10	NA	F5GYX7	Monocytes	1
XTXEA_040759	NFASC	NA	D6RBU5	Brain;Frontal cortex;Retina;Spinal cord	4
XTXEA_040781	NID2	NA	A0A087WZP6	Brain;Frontal cortex;Gut;Liver	4
XTXEA_040844	NPC2	NA	J3KMY5	Adrenal gland;Esophagus;Gut;Heart;Kidney;Lung;Monocytes;NK cells;Ovary;Testis	10
XTXEA_040897	NT5E	NA	Q96B60	Heart;Kidney	2
XTXEA_040911	NUCB2	NA	E9PLR0	Adrenal gland;Brain;CD4+ Tcells;CD8+ Tcells;Colon;Gall bladder;Heart;Liver;Lung;Monocytes;NK cells;Ovary;Pancreas;Placenta;Platelets;Prostate;Rectum;Retina;Spinal cord;Testis;Urinary bladder	21
XTXEA_041003	OS9	NA	B4E321	Ovary	1
XTXEA_041004	OS9	NA	F8W1V2	Spinal cord	1
XTXEA_041006	OS9	NA	F8W0R2	B cells;CD8+ Tcells;Liver;Monocytes;Ovary;Pancreas;Prostate;Rectum;Testis	9
XTXEA_041310	PIGK	NA	A6NEM5	Adrenal gland;Brain;Gall bladder;Heart;Kidney;Liver;Monocytes;Placenta	8
XTXEA_041359	PLA2G15	NA	H3BM47	Monocytes	1
XTXEA_041676	PRSS1;PRSS3P1;PRSS3P2	NA	A0A087WW55	Gut;NK cells;Pancreas	3
XTXEA_042343	SAA1	NA	E9PQD6	Esophagus;Gall bladder;Monocytes;Rectum;Retina	5
XTXEA_042418	NAAA;SDAD1	NA	D6R9S9	B cells;CD8+ Tcells;Monocytes	3
XTXEA_042528	SERPINH1	NA	E9PK86	Adrenal gland;Colon;Gall bladder;Gut;Heart;Kidney;Liver;Lung;Ovary;Placenta;Platelets;Prostate;Rectum;Retina;Testis;Urinary bladder	16
XTXEA_042530	SERPINH1	NA	E9PQ34	CD4+ Tcells;Frontal cortex;Monocytes;NK cells	4
XTXEA_042955	SPARCL1	NA	D6RA29	Frontal cortex	1
XTXEA_043453	TMED10	NA	G3V2K7	Adrenal gland;B cells;Brain;CD4+ Tcells;CD8+ Tcells;Colon;Esophagus;Frontal cortex;Gall bladder;Gut;Heart;Kidney;Liver;Lung;Monocytes;NK cells;Ovary;Pancreas;Placenta;Platelets;Prostate;Rectum;Retina;Spinal cord;Testis;Urinary bladder	26
XTXEA_043555	TMX1	NA	G3V448	Esophagus	1
XTXEA_043901	UGT3A1	NA	B7Z8Q8	Gut;Kidney	2
XTXEX_049800	SLAMF1	NA	Q96QJ2	B cells;CD4+ Tcells;CD8+ Tcells	3
XTXEX_050012	GRM2	NA	H7BXL3	Frontal cortex;Retina	2
XTXEX_050125	SLIT1	NA	Q5T0V4	Brain	1
XTXEX_050128	COL6A3	NA	E7ENL6	Adrenal gland;Brain;Colon;Esophagus;Frontal cortex;Gall bladder;Gut;Heart;Kidney;Liver;Lung;Monocytes;Ovary;Pancreas;Placenta;Prostate;Rectum;Spinal cord;Testis;Urinary bladder	20
XTXEX_050136	GRIN1	NA	A2AVK2	Frontal cortex	1
XTXEX_050161	NUCB2	NA	A0A087WSV8	Adrenal gland;CD8+ Tcells;Heart;Prostate;Rectum;Testis;Urinary bladder	7
XTXEX_050346	GH1	NA	B1A4G9	Esophagus;Gut;Heart;Liver;Placenta	5
XTXEX_050694	CR2	NA	Q5SR47	B cells	1
XTXEX_050727	CFHR1	NA	B1AKG0	Adrenal gland;Colon;Heart;Liver;Lung;Monocytes;Ovary;Pancreas;Prostate;Retina;Spinal cord;Testis;Urinary bladder	13
XTXEX_051100	RPN2	NA	Q5JYR7	Esophagus	1
XTXEX_051197	AGER	NA	Q5SSZ2	Lung	1
XTXEX_051318	CUBN	NA	B0YIZ6	Kidney	1
XTXEX_051606	IGKV1-33;IGKV1D-33	NA	A0A0B4J1U0	Gall bladder;Ovary;Prostate;Spinal cord;Testis;Urinary bladder	6
XTXEX_051642	IGLV2-11	NA	A0A075B6K3	Spinal cord	1
XTXEX_051643	IGLV3-10	NA	A0A075B6K4	Colon	1
XTXEX_051696	IGHV2-5	NA	A0A0A0MS10	Adrenal gland;Gut	2
XTXEX_051700	IGHV3-15	NA	A0A0B4J1V0	Colon;Gut;Lung;Ovary;Pancreas;Prostate;Testis;Urinary bladder	8
XTXEX_051702	IGHV1-18	NA	A0A0C4DH31	Colon;Gall bladder;Ovary;Prostate;Rectum;Spinal cord;Testis;Urinary bladder	8
XTXEX_051707	IGHV4-28	NA	A0A0C4DH34	Adrenal gland;Colon;Esophagus;Gall bladder;Kidney;Lung;Ovary;Pancreas;Prostate;Rectum;Testis;Urinary bladder	12
XTXEX_051711	IGHV3-38	NA	A0A0C4DH36	Colon;Ovary;Rectum;Spinal cord;Testis;Urinary bladder	6
XTXEX_051718	IGHV3-53	NA	A0A087WSX4	Placenta	1
XTXEX_051785	MOXD1	NA	A6PVS1	Testis	1
XTXEX_052306	C1S	NA	B5MCV4	Adrenal gland;Colon;Esophagus;Gall bladder;Gut;Liver;Lung;Monocytes;Ovary;Pancreas;Prostate;Rectum;Spinal cord;Testis;Urinary bladder	15
XTXEX_052409	QPCT	NA	B5MCZ9	Adrenal gland	1
XTXEX_052446	A2M	NA	F8W7L3	Adrenal gland;Brain;Colon;Esophagus;Frontal cortex;Gall bladder;Gut;Heart;Kidney;Liver;Lung;Ovary;Pancreas;Placenta;Prostate;Rectum;Retina;Spinal cord;Testis	19
XTXEX_052792	CADM3	NA	A0A0C4DG09	Ovary;Placenta	2
XTXEX_052793	TAPBP	NA	Q6P1N7	B cells;CD4+ Tcells;CD8+ Tcells;Colon;Monocytes;NK cells;Ovary;Platelets;Retina;Spinal cord;Urinary bladder	11
XTXEX_052852	AGER	NA	A0A0G2JKB6	Lung	1
XTXEX_053511	CHL1	NA	C9JH37	Brain;Colon;Frontal cortex;Ovary;Rectum;Retina;Spinal cord;Testis	8
XTXEX_053712	SEMA4C	NA	C9J4M7	Brain	1
XTXEX_053821	AMY2B	NA	C9J2Z5	Gall bladder;Pancreas;Spinal cord;Urinary bladder	4
XTXEX_053982	CHADL	NA	H0Y4I5	Retina;Spinal cord;Urinary bladder	3
XTXEX_053988	EFEMP1	NA	Q580Q6	Adrenal gland;Gall bladder;Heart;Liver;Pancreas;Prostate;Rectum;Testis;Urinary bladder	9
XTXEX_054148	PTGDS	NA	Q5SQ11	Gut;Retina	2
XTXEX_054173	BCAN	NA	Q5T3I8	Brain;Frontal cortex	2
XTXEX_054360	MELTF;MFI2	NA	C9JVN1	Gut;Prostate;Retina	3
XTXEX_054599	DDR1	NA	E7ERI6	Frontal cortex;Pancreas;Prostate;Rectum;Retina	5
XTXEX_054646	IGHV3-74	NA	A0A0B4J1X5	B cells;Pancreas;Prostate;Rectum;Urinary bladder	5
XTXEX_054765	P4HA2	NA	C9JN43	Liver;Ovary;Placenta;Testis	4
XTXEX_055087	AZGP1	NA	C9JEV0	Adrenal gland;Colon;Esophagus;Gall bladder;Heart;Kidney;Lung;Monocytes;Ovary;Pancreas;Prostate;Rectum;Retina;Spinal cord;Testis;Urinary bladder	16
XTXEX_055200	P4HA2	NA	C9JCP0	Heart;Lung;Testis	3
XTXEX_055392	NUCB1	NA	C9JBD3	Adrenal gland;B cells;Brain;CD4+ Tcells;CD8+ Tcells;Colon;Esophagus;Gall bladder;Gut;Heart;Kidney;Liver;Lung;Monocytes;NK cells;Ovary;Pancreas;Placenta;Platelets;Prostate;Rectum;Retina;Spinal cord;Testis;Urinary bladder	25
XTXEX_055439	SFTPA2	NA	X6REF7	Lung	1
XTXEX_055502	ACE	NA	A0A0A0MSN4	Adrenal gland;Ovary	2
XTXEX_055702	PXDN	NA	C9J4I9	Gut;Heart;Ovary;Prostate;Rectum;Testis;Urinary bladder	7
XTXEX_056271	TPST2	NA	B1AHJ7	CD8+ Tcells;Pancreas;Platelets;Testis	4
XTXEX_056566	DAG1	NA	C9JYS1	Colon;Gut;Monocytes;Platelets;Testis	5
XTXEX_056629	AMY2B	NA	C9JWK7	Adrenal gland;Rectum	2
XTXEX_056633	IL1R1	NA	C9JW84	Liver	1
XTXEX_056648	IGHV3-64	NA	A0A075B6Q5	Urinary bladder	1
XTXEX_056649	BCAN	NA	Q5T3I6	Brain;Frontal cortex;Spinal cord	3
XTXEX_056903	IL2RB	NA	B0QYC1	NK cells	1
XTXEX_057161	IGKV3D-15	NA	A0A087WSY6	Adrenal gland	1
XTXEX_057277	EPHA4	NA	C9JIX8	Brain;Ovary	2
XTXEX_057408	C1QB	NA	A0A0A0MSV6	Adrenal gland;Colon;Frontal cortex;Gall bladder;Gut;Heart;Kidney;Liver;Lung;Monocytes;Ovary;Prostate;Rectum;Spinal cord;Testis;Urinary bladder	16
XTXEX_057612	PLOD1	NA	Q5JXB7	CD8+ Tcells	1
XTXEX_057727	TMED2	NA	E7EQ72	Adrenal gland;B cells;CD4+ Tcells;CD8+ Tcells;Colon;Frontal cortex;Gut;Heart;Liver;Lung;Monocytes;NK cells;Ovary;Pancreas;Platelets;Prostate;Retina;Testis;Urinary bladder	19
XTXEX_057902	ARSE	NA	C9J5G7	Liver	1
XTXEX_058185	PIGT	NA	B7Z7C5	Ovary	1
XTXEX_058485	Nucb2;NUCB2	NA	Q2L696	Adrenal gland;CD4+ Tcells;CD8+ Tcells;Colon;Esophagus;Heart;Kidney;Liver;Lung;Monocytes;Ovary;Pancreas;Placenta;Platelets;Prostate;Rectum;Retina;Testis;Urinary bladder	19
XTXEX_058911	ACHE	NA	F8WAR7	Retina	1
XTXEX_058991	IGHV4-4	NA	A0A075B6R2	Rectum	1
XTXEX_059045	ADGRB2	NA	A2A3C4	Frontal cortex	1
XTXEX_059222	PTGS1	NA	X6RJD6	Esophagus;Testis	2
XTXEX_059288	GUSB	NA	F8WBK6	Adrenal gland;CD4+ Tcells;CD8+ Tcells;Colon;Esophagus;Gall bladder;Gut;Kidney;Liver;Lung;Monocytes;NK cells;Ovary;Pancreas;Placenta;Platelets;Prostate;Rectum;Spinal cord;Testis	20
XTXEX_059313	AGR2	NA	C9J3E2	Colon;Gall bladder;Gut;Lung;Pancreas;Placenta;Prostate;Rectum;Urinary bladder	9
XTXEX_059657	LRRC32	NA	C9JYU3	Adrenal gland;Ovary;Pancreas;Prostate	4
XTXEX_059695	IGFBP5	NA	C9JXX4	Adrenal gland;Brain;Frontal cortex;Gall bladder;Heart	5
XTXEX_059705	IGFBP1	NA	C9JXF9	Gall bladder;Gut;Heart;Liver;Placenta	5
XTXEX_059861	PTPRA	NA	Q5JWG0	Adrenal gland;B cells;Brain;CD4+ Tcells;CD8+ Tcells;Esophagus;Frontal cortex;Gall bladder;Monocytes;NK cells;Ovary;Pancreas;Platelets;Prostate;Spinal cord;Urinary bladder	16
XTXEX_059943	PLOD1	NA	Q5JXB8	Adrenal gland;Pancreas	2
XTXEX_060219	SCG2	NA	C9JDT0	Brain;Frontal cortex	2
XTXEX_060371	PLOD3	NA	C9JIX5	Adrenal gland;CD8+ Tcells;Colon;Gall bladder;Gut;Lung;Monocytes;Ovary;Pancreas;Placenta;Prostate;Rectum;Testis;Urinary bladder	14
XTXEX_060631	IGFBP1	NA	C9J6H2	Adrenal gland;Brain;Gall bladder;Gut;Heart;Liver;Ovary;Pancreas;Placenta;Testis	10
XTXEX_060759	GABBR1	NA	C9J342	Brain;Frontal cortex;Retina	3
XTXEX_060766	IGKV1-16	NA	A0A0A0MT74	Adrenal gland;Kidney;Lung;Testis	4
XTXEX_060852	BTN2A2	NA	C9JAJ6	Liver	1
XTXEX_060972	SERPINI2	NA	C9J7N5	Adrenal gland;B cells;CD4+ Tcells;CD8+ Tcells;Colon;Esophagus;Heart;Kidney;Liver;Lung;Monocytes;NK cells;Ovary;Placenta;Platelets;Prostate;Rectum;Retina;Spinal cord;Testis;Urinary bladder	21
XTXEX_061005	ITIH4	NA	B7ZKJ8	Adrenal gland;Gall bladder;Monocytes;Ovary;Spinal cord;Testis	6
XTXEX_061035	PTPRD	NA	C9J6E4	Brain;Heart;Ovary	3
XTXEX_061239	C2	NA	F8WCJ9	Adrenal gland;Lung;Ovary;Prostate;Rectum	5
XTXEX_061251	IGKV1-17	NA	A0A0B4J1Z4	Adrenal gland;Gall bladder;Lung;Ovary;Prostate;Rectum;Retina;Spinal cord;Testis;Urinary bladder	10
XTXEX_061340	DNASE1L3	NA	C9J0L2	Adrenal gland	1
XTXEX_061545	IGKV2D-30	NA	A0A075B6S6	Gall bladder	1
XTXEX_061583	MEGF6	NA	H7C557	Pancreas	1
XTXEX_061584	PTK7	NA	Q86X91	Gut;Ovary;Testis	3
XTXEX_061661	IGKV1-8	NA	A0A0C4DH67	Adrenal gland;Esophagus;Prostate;Rectum;Testis	5
XTXEX_061701	IGKV2-24	NA	A0A0C4DH68	Adrenal gland;B cells;Colon;Esophagus;Gall bladder;Heart;Kidney;Liver;Lung;Ovary;Pancreas;Placenta;Prostate;Rectum;Retina;Spinal cord;Testis;Urinary bladder	18
XTXEX_062486	CANX	NA	D6RGY2	Adrenal gland;B cells;Brain;CD4+ Tcells;CD8+ Tcells;Colon;Esophagus;Frontal cortex;Gall bladder;Gut;Heart;Kidney;Liver;Lung;Monocytes;NK cells;Ovary;Pancreas;Placenta;Platelets;Prostate;Rectum;Retina;Spinal cord;Testis;Urinary bladder	26
XTXEX_062717	ERAP1	NA	D6RAL9	Adrenal gland;B cells;Brain;CD4+ Tcells;CD8+ Tcells;Colon;Frontal cortex;Gut;Heart;Liver;Lung;Monocytes;NK cells;Ovary;Placenta;Platelets;Prostate;Retina;Testis	19
XTXEX_062767	CANX	NA	D6RAQ8	Adrenal gland;B cells;Brain;CD4+ Tcells;CD8+ Tcells;Colon;Esophagus;Frontal cortex;Gall bladder;Gut;Heart;Kidney;Liver;Lung;Monocytes;NK cells;Ovary;Pancreas;Placenta;Platelets;Prostate;Rectum;Retina;Spinal cord;Testis;Urinary bladder	26
XTXEX_063071	TMEM165	NA	D6RBL0	Adrenal gland;B cells;Brain;CD8+ Tcells;Frontal cortex;Gall bladder;Gut;Liver;Lung;Monocytes;NK cells;Ovary;Pancreas;Platelets;Prostate;Retina;Testis;Urinary bladder	18
XTXEX_063227	SPP1	NA	D6R9C5	Brain;Kidney;Pancreas;Placenta;Retina;Spinal cord	6
XTXEX_063536	HAPLN1	NA	D6RC59	Colon;Frontal cortex;Heart;Ovary;Placenta;Prostate;Rectum;Spinal cord;Urinary bladder	9
XTXEX_063714	CANX	NA	D6RB85	Adrenal gland;B cells;Brain;CD4+ Tcells;CD8+ Tcells;Colon;Esophagus;Frontal cortex;Gall bladder;Gut;Heart;Liver;Lung;Monocytes;NK cells;Ovary;Placenta;Platelets;Prostate;Retina;Spinal cord;Testis;Urinary bladder	23
XTXEX_063758	MZB1	NA	H0Y9L3	Colon;Lung;Prostate	3
XTXEX_063807	CLGN	NA	D6RAZ4	Liver	1
XTXEX_063868	CANX	NA	D6RAU8	Adrenal gland;B cells;Brain;CD4+ Tcells;CD8+ Tcells;Colon;Frontal cortex;Gall bladder;Gut;Heart;Liver;Lung;Monocytes;NK cells;Ovary;Pancreas;Platelets;Prostate;Rectum;Retina;Spinal cord;Testis;Urinary bladder	23
XTXEX_064335	CANX	NA	D6RHJ3	Adrenal gland;B cells;Brain;CD4+ Tcells;CD8+ Tcells;Colon;Esophagus;Frontal cortex;Gall bladder;Gut;Heart;Kidney;Liver;Lung;Monocytes;NK cells;Ovary;Pancreas;Placenta;Platelets;Prostate;Rectum;Retina;Spinal cord;Testis;Urinary bladder	26
XTXEX_064521	CD14	NA	D6RFL4	Frontal cortex;Gut;Retina;Spinal cord	4
XTXEX_064546	HAPLN1	NA	D6RFI7	Rectum	1
XTXEX_064687	BTN3A1	NA	E9PFB8	B cells;CD8+ Tcells;Lung;NK cells;Pancreas;Spinal cord	6
XTXEX_065009	CLU	NA	E5RG36	Adrenal gland;B cells;Colon;Esophagus;Frontal cortex;Gall bladder;Gut;Heart;Kidney;Liver;Lung;Monocytes;Ovary;Pancreas;Placenta;Platelets;Prostate;Rectum;Retina;Spinal cord;Testis;Urinary bladder	22
XTXEX_065079	PENK	NA	E5RFR1	Adrenal gland	1
XTXEX_065762	CLU	NA	E7ERK6	Adrenal gland;Colon;Esophagus;Frontal cortex;Gall bladder;Heart;Kidney;Liver;Lung;Monocytes;Ovary;Pancreas;Placenta;Platelets;Prostate;Rectum;Retina;Spinal cord;Testis;Urinary bladder	20
XTXEX_066279	LAMA4	NA	E5RK79	Adrenal gland;Colon;Gall bladder;Heart;Lung;Ovary;Pancreas;Platelets;Prostate;Rectum;Testis;Urinary bladder	12
XTXEX_066739	ILDR2	NA	E9PLS0	Frontal cortex;Retina	2
XTXEX_067007	SERPINH1	NA	E9PJH8	Adrenal gland;Brain;CD8+ Tcells;Colon;Esophagus;Gall bladder;Gut;Heart;Kidney;Liver;Lung;Ovary;Pancreas;Placenta;Platelets;Prostate;Rectum;Retina;Spinal cord;Testis;Urinary bladder	21
XTXEX_067814	NUCB2	NA	E9PKG6	B cells;Esophagus;NK cells;Spinal cord	4
XTXEX_067830	CHID1	NA	E9PKF1	CD4+ Tcells;Colon;Prostate;Rectum;Spinal cord	5
XTXEX_067862	GRIA4	NA	E9PJZ5	Retina	1
XTXEX_067933	PNLIPRP1	NA	E9PJC9	Pancreas	1
XTXEX_068334	CHID1	NA	E9PPA0	Gut;Pancreas	2
XTXEX_068538	ACR	NA	E9PLV5	Ovary;Testis	2
XTXEX_068736	NUCB2	NA	E9PJP3	Adrenal gland;B cells;Brain;CD4+ Tcells;CD8+ Tcells;Colon;Esophagus;Gall bladder;Heart;Kidney;Liver;Lung;Monocytes;NK cells;Ovary;Pancreas;Placenta;Platelets;Prostate;Rectum;Retina;Spinal cord;Testis	23
XTXEX_068904	CTSB	NA	E9PS78	Adrenal gland;CD8+ Tcells;Gall bladder;Gut;Heart;Kidney;Liver;Lung;Monocytes;Pancreas;Placenta;Prostate;Rectum;Testis	14
XTXEX_068964	PPT2	NA	A0A0G2JLK6	Ovary;Testis	2
XTXEX_068985	SERPINH1	NA	E9PR70	Brain;NK cells;Retina;Spinal cord	4
XTXEX_069260	LRP5	NA	E9PHY1	Monocytes	1
XTXEX_069307	CHID1	NA	E9PI70	Adrenal gland;Brain;CD8+ Tcells;Frontal cortex;Gut;Heart;Kidney;Liver;Lung;Monocytes;NK cells;Ovary;Pancreas;Placenta;Platelets;Retina;Testis;Urinary bladder	18
XTXEX_069456	SERPINH1	NA	E9PNX1	Adrenal gland;Brain;CD8+ Tcells;Colon;Esophagus;Gall bladder;Gut;Heart;Kidney;Liver;Lung;NK cells;Pancreas;Placenta;Prostate;Rectum;Retina;Spinal cord;Testis;Urinary bladder	20
XTXEX_069464	CD59	NA	E9PNW4	Adrenal gland;B cells;Brain;CD4+ Tcells;Colon;Esophagus;Frontal cortex;Gall bladder;Gut;Heart;Kidney;Liver;Lung;NK cells;Ovary;Pancreas;Placenta;Prostate;Rectum;Retina;Spinal cord;Testis;Urinary bladder	23
XTXEX_070919	FOLR2	NA	F5H4Z6	Gall bladder;Liver;Lung;Ovary;Pancreas;Spinal cord	6
XTXEX_070933	SPARCL1	NA	F5H4Y3	Colon;Heart;Kidney;Lung;Prostate;Spinal cord;Urinary bladder	7
XTXEX_071038	WNT5B	NA	F5H364	Prostate	1
XTXEX_071270	CPM	NA	F8VR29	Frontal cortex;Retina;Testis	3
XTXEX_071309	ITGB7	NA	F8W186	B cells;CD8+ Tcells;NK cells	3
XTXEX_071344	CPM	NA	F8W111	Kidney;Lung;Monocytes;Placenta	4
XTXEX_071440	NELL2	NA	F8W1A2	Brain;Frontal cortex	2
XTXEX_072486	CNTN1	NA	F8VQW3	Brain;Frontal cortex;Ovary;Prostate;Retina;Spinal cord;Testis;Urinary bladder	8
XTXEX_072571	GZMH	NA	A0A0C4DGJ9	Lung	1
XTXEX_072732	NPC2	NA	G3V2V8	Gut;Heart;Liver;Ovary;Pancreas;Prostate;Rectum;Spinal cord;Testis	9
XTXEX_072880	SEL1L	NA	G3V3B3	CD4+ Tcells;CD8+ Tcells;Colon;Gall bladder;Kidney;Lung;Monocytes;Platelets;Rectum;Spinal cord;Urinary bladder	11
XTXEX_073178	LRP1	NA	Q6PJ72	Adrenal gland;Brain;Colon;Esophagus;Frontal cortex;Gall bladder;Gut;Heart;Kidney;Liver;Lung;Monocytes;NK cells;Ovary;Pancreas;Placenta;Prostate;Rectum;Retina;Spinal cord;Testis;Urinary bladder	22
XTXEX_073375	ERO1A	NA	G3V503	Adrenal gland;Brain;CD4+ Tcells;CD8+ Tcells;Colon;Esophagus;Frontal cortex;Gut;Heart;Kidney;Liver;Monocytes;Ovary;Pancreas;Placenta;Retina;Testis;Urinary bladder	18
XTXEX_073486	ERO1A	NA	G3V5B3	Adrenal gland;B cells;Brain;CD4+ Tcells;CD8+ Tcells;Colon;Esophagus;Frontal cortex;Gall bladder;Gut;Heart;Kidney;Liver;Lung;Monocytes;NK cells;Ovary;Pancreas;Placenta;Platelets;Prostate;Rectum;Retina;Spinal cord;Testis;Urinary bladder	26
XTXEX_073942	ISLR	NA	H0YL90	Prostate;Urinary bladder	2
XTXEX_074256	SEMA4B	NA	H0YMR1	Ovary;Rectum;Retina;Urinary bladder	4
XTXEX_074385	ADAM10	NA	H0YNC5	Testis	1
XTXEX_074533	ISLR2	NA	H3BM69	Brain;Frontal cortex	2
XTXEX_074687	PLA2G15	NA	H3BMU8	Brain	1
XTXEX_074842	ADGRG1	NA	H3BNH4	Brain;Placenta	2
XTXEX_075218	PECAM1	NA	A0A075B727	Brain	1
XTXEX_075361	ADGRG1	NA	H3BQW4	Brain;NK cells;Testis	3
XTXEX_075930	ADGRG1	NA	H3BVE9	Brain;CD8+ Tcells;Frontal cortex;NK cells;Pancreas;Spinal cord;Testis	7
XTXEX_075968	PECAM1	NA	A0A075B737	Brain;Esophagus;Testis	3
XTXEX_075999	SPINT1	NA	H3BTQ8	Gut;Ovary;Placenta;Rectum	4
XTXEX_076245	LOXL1	NA	H3BUV8	Gall bladder;Heart;Lung	3
XTXEX_076384	CDH1	NA	H3BVI7	Colon;Esophagus;Gall bladder;Gut;Heart;Kidney;Liver;Lung;Pancreas;Placenta;Prostate;Rectum;Spinal cord	13
XTXEX_076590	ZG16B	NA	I3L1H9	Adrenal gland;NK cells;Prostate;Spinal cord	4
XTXEX_077107	SERPINF1	NA	I3L425	Adrenal gland;CD8+ Tcells;Colon;Frontal cortex;Gall bladder;Heart;Kidney;Liver;Lung;Monocytes;Ovary;Pancreas;Placenta;Prostate;Rectum;Retina;Spinal cord;Testis;Urinary bladder	19
XTXEX_077287	SERPINF1	NA	I3L4Z0	Adrenal gland;Esophagus;Frontal cortex;Liver;Lung;Pancreas;Spinal cord	7
XTXEX_077385	ACE	NA	J3KRH5	Kidney;Testis	2
XTXEX_077642	DSG2	NA	J3KSI6	Testis	1
XTXEX_078108	HP	NA	J3QLC9	Adrenal gland;Brain;Colon;Esophagus;Frontal cortex;Gall bladder;Gut;Heart;Kidney;Liver;Lung;Monocytes;Ovary;Pancreas;Placenta;Platelets;Prostate;Rectum;Retina;Spinal cord;Testis;Urinary bladder	22
XTXEX_078547	VWA1	NA	J3QRR0	Placenta	1
XTXEX_078802	ACP5	NA	K7EIP0	B cells;CD8+ Tcells;Liver;Lung;NK cells	5
XTXEX_078903	APOC2	NA	Q6P163	Brain;CD8+ Tcells;Esophagus;Gut;Heart;Kidney;Liver;Lung;Monocytes;Prostate;Rectum;Spinal cord;Testis;Urinary bladder	14
XTXEX_079130	LGALS3BP	NA	K7EJY8	Adrenal gland;Brain;Colon;Frontal cortex;Gall bladder;Gut;Heart;Kidney;Liver;Lung;Ovary;Pancreas;Prostate;Rectum;Retina;Spinal cord;Testis;Urinary bladder	18
XTXEX_079354	PRKCSH	NA	K7EKX1	Ovary	1
XTXEX_079788	CNTNAP1	NA	K7EMM9	Brain;Frontal cortex;Ovary;Retina;Spinal cord;Testis	6
XTXEX_079967	DNASE2	NA	K7ENE5	CD4+ Tcells;CD8+ Tcells;Gall bladder;Heart;Liver;Monocytes;NK cells;Prostate;Rectum	9
XTXEX_080325	PRKCSH	NA	K7EPW7	Adrenal gland;B cells;CD4+ Tcells;CD8+ Tcells;Colon;Frontal cortex;Gall bladder;Gut;Kidney;Liver;Monocytes;NK cells;Ovary;Pancreas;Platelets;Prostate;Rectum;Retina;Spinal cord;Testis	20
XTXEX_081010	PSG3	NA	M0QX68	Placenta	1
XTXEX_081338	CD22	NA	M0QYP4	B cells	1
XTXEX_081382	PGLYRP2	NA	M0QYW3	Heart;Prostate;Testis	3
XTXEX_081385	IL4I1	NA	M0QYW8	CD4+ Tcells;CD8+ Tcells;Colon;NK cells;Retina;Testis;Urinary bladder	7
XTXEX_081654	CYP2S1	NA	M0R057	Colon;Gall bladder;Gut;Liver;Rectum	5
XTXEX_081736	FCGRT	NA	M0R0K7	Adrenal gland;B cells;Gut;Heart;Liver;Lung;Monocytes;NK cells;Ovary;Pancreas;Placenta;Rectum;Testis;Urinary bladder	14
XTXEX_082132	CYP2S1	NA	M0R2G8	Lung;Pancreas	2
XTXEX_082690	CCL5	NA	A0A075B7C5	Urinary bladder	1
XTXEX_082791	IGHV1OR15-9	NA	A0A0B4J2B8	Gall bladder	1
XTXEX_082987	CTSA	NA	U3KQ41	Adrenal gland;Gut;Kidney;Lung;NK cells;Ovary;Placenta;Platelets;Rectum	9
XTXEX_083273	APOA2	NA	V9GYC1	Adrenal gland;Colon;Gut;Heart;Kidney;Liver;Monocytes;Ovary;Prostate;Retina;Spinal cord;Testis;Urinary bladder	13
XTXEX_083314	LIME1	NA	V9GYI1	B cells;CD4+ Tcells;CD8+ Tcells;Liver;NK cells	5
XTXEX_083539	SERPINA1	NA	A0A024R6I7	Brain;Frontal cortex;Placenta;Platelets;Prostate;Testis	6
XTXEX_083579	COL1A2	NA	A0A087WTA8	Adrenal gland;Brain;Colon;Esophagus;Frontal cortex;Gall bladder;Gut;Heart;Kidney;Liver;Lung;Ovary;Pancreas;Placenta;Prostate;Rectum;Retina;Spinal cord;Testis;Urinary bladder	20
XTXEX_083593	IGHM	NA	A0A087WYJ9	Colon;Gall bladder;Ovary;Rectum	4
XTXEX_083802	PRSS1	NA	A6XGL3	CD8+ Tcells;Frontal cortex;Gall bladder;Gut;NK cells	5
XTXEX_083843	CDH1	NA	A0A087WU43	Colon;Gut;Kidney;Liver;Lung;Pancreas;Prostate	7
XTXEX_083934	IGHG1	NA	A0A087X1C7	Gall bladder	1
XTXEX_084037	IGHG1	NA	A0A087X079	Adrenal gland;Brain;Esophagus;Frontal cortex;Gall bladder;Gut;Heart;Liver;Lung;Pancreas;Placenta;Retina;Testis	13
XTXEX_084051	IGKV3D-11	NA	A0A087WUS2	Adrenal gland;B cells;Colon;Esophagus;Gall bladder;Gut;Heart;Kidney;Liver;Lung;NK cells;Ovary;Pancreas;Placenta;Platelets;Prostate;Rectum;Retina;Spinal cord;Testis;Urinary bladder	21
XTXEX_084162	FBN2	NA	A0A087WV40	Heart;Placenta;Testis	3
XTXEX_084215	SELT	NA	A0A087WVA1	CD4+ Tcells;Liver;Testis	3
XTXEX_084464	ITIH3	NA	A0A087WW43	Colon;Esophagus;Heart;Lung;Monocytes;Ovary;Pancreas;Prostate;Rectum;Spinal cord;Testis;Urinary bladder	12
XTXEX_084515	TNXB	NA	A0A087WWA5	Adrenal gland;Colon;Esophagus;Liver;Lung;Ovary;Pancreas;Prostate;Rectum;Spinal cord;Testis;Urinary bladder	12
XTXEX_084558	SELM	NA	A0A087WWF1	Colon;Ovary;Prostate;Rectum;Urinary bladder	5
XTXEX_084564	MUCL1	NA	A0A087WWF8	NK cells	1
XTXEX_084738	RBP4	NA	A0A0C4DGV7	Adrenal gland;Colon;Heart;Liver;Ovary;Pancreas;Prostate;Retina;Spinal cord;Testis	10
XTXEX_084760	ITGB2	NA	A0A087WX36	Urinary bladder	1
XTXEX_084801	LAMA2	NA	A0A087WX80	Testis	1
XTXEX_084809	PNLIPRP2	NA	A0A087WX88	Pancreas	1
XTXEX_084811	VGF	NA	Q05BJ3	Spinal cord	1
XTXEX_084823	PSAP	NA	Q5BJH1	Adrenal gland;B cells;Brain;Colon;Esophagus;Frontal cortex;Gall bladder;Gut;Kidney;NK cells;Ovary;Rectum;Retina;Spinal cord;Urinary bladder	15
XTXEX_084862	IGKV1D-13	NA	A0A0B4J2D9	Gall bladder;Prostate;Retina;Testis;Urinary bladder	5
XTXEX_084894	FCGBP	NA	A0A087WXI2	Colon;Esophagus;Gall bladder;Gut;Monocytes;Ovary;Pancreas;Prostate;Rectum;Retina;Spinal cord;Urinary bladder	12
XTXEX_084907	GH2	NA	A0A087WXJ5	Placenta	1
XTXEX_085155	LAMA2	NA	A0A087WYF1	Adrenal gland;Colon;Esophagus;Frontal cortex;Gall bladder;Gut;Heart;Kidney;Liver;Lung;Ovary;Pancreas;Prostate;Rectum;Retina;Testis;Urinary bladder	17
XTXEX_085269	FBN2	NA	A0A087WYV8	Adrenal gland;Colon;Gut;Placenta;Rectum;Testis	6
XTXEX_085378	IGKV1D-12	NA	A0A0B4J2E7	Gall bladder;Testis;Urinary bladder	3
XTXEX_085490	LIME1	NA	A0A087WZP9	CD8+ Tcells	1
XTXEX_085493	IGHV4-34	NA	A0A0G2JP38	Adrenal gland;B cells;Colon;Esophagus;Gall bladder;Gut;Heart;Kidney;Lung;Ovary;Pancreas;Prostate;Rectum;Retina;Spinal cord;Testis;Urinary bladder	17
XTXEX_085510	MTTP	NA	A0A087WZS2	Brain;Colon;Gall bladder;Kidney	4
XTXEX_085613	MUC1	NA	A0A087X061	Colon;Kidney;Lung	3
XTXEX_085687	IGHG1	NA	A0A087WYC5	Gall bladder	1
XTXEX_085880	IGHG1	NA	A0A087WV47	Adrenal gland;B cells;Colon;Esophagus;Gall bladder;Heart;Kidney;Ovary;Pancreas;Prostate;Rectum;Retina;Spinal cord;Testis;Urinary bladder	15
XTXEX_086448	MAMDC2	NA	A0A0G2JQ91	Adrenal gland;Colon;Esophagus;Gall bladder;Lung;Ovary;Pancreas;Prostate;Spinal cord;Testis;Urinary bladder	11
XTXEX_086578	CNTNAP2	NA	A0A0D9SES4	Frontal cortex	1
XTXEX_086830	SERPINA1	NA	A0A0G2JRN3	B cells;CD8+ Tcells;Monocytes;NK cells	4
XTXEX_086841	NA	NA	A0A0G2JRQ6	Rectum	1
XTXEX_087128	PRSS2	NA	A6XMV8	Gut;NK cells;Pancreas	3
XTXEX_087166	NA	NA	A0A0J9YX35	Esophagus;Gall bladder;Rectum;Urinary bladder	4
XTXXA_087651	ADAM10	NA	A0AV88	Colon;Gall bladder;Testis	3
XTXXA_087678	AHCYL1	NA	Q6ZMM9	Brain;Esophagus;Lung;NK cells;Placenta;Urinary bladder	6
XTXXA_087733	APOD	NA	B4DGC3	Adrenal gland;Colon;Esophagus;Frontal cortex;Gall bladder;Gut;Heart;Kidney;Liver;Lung;Monocytes;Pancreas;Placenta;Platelets;Prostate;Rectum;Spinal cord;Urinary bladder	18
XTXXA_088517	GGH	NA	B4DVI2	Heart;Testis	2
XTXXA_088640	HLA-DPB2	NA	B4DVQ8	Monocytes	1
XTXXA_089246	NRP1	NA	Q9H2E0	Gut;Pancreas;Prostate;Rectum	4
XTXXA_090002	THSD4	NA	B4E1J6	Prostate	1
XTXXX_099092	NA	NA	A0A024QYW2	Adrenal gland;Gall bladder;Pancreas	3
XTXXX_099601	TNC	NA	A0A024R884	Adrenal gland;Brain;Colon;Esophagus;Frontal cortex;Gall bladder;Gut;Kidney;Liver;Lung;Ovary;Pancreas;Prostate;Rectum;Retina;Spinal cord;Urinary bladder	17
XTXXX_099767	ARTS-1	NA	A0A024RAR8	B cells;Colon;Gall bladder;Heart;Liver;NK cells;Platelets;Prostate	8
XTXXX_101057	HLA-B	NA	A0A060VD11	CD8+ Tcells	1
XTXXX_101349	ERAP1	NA	A0A075BTL2	Esophagus;Gall bladder;Kidney	3
XTXXX_101350	ERAP1	NA	A0A075BV59	Brain;Frontal cortex	2
XTXXX_101351	ERAP1	NA	A0A075BW43	Colon;Lung;Pancreas;Prostate;Rectum;Spinal cord;Urinary bladder	7
XTXXX_101520	HLA-B	NA	A0A088MI97	B cells	1
XTXXX_101685	FKBP9	NA	A0A090N8P3	Pancreas	1
XTXXX_103319	ERAP1	NA	A0A0A7E6D4	Adrenal gland;CD8+ Tcells;Frontal cortex;Heart;Lung;Monocytes;Pancreas;Rectum;Testis	9
XTXXX_103320	ERAP1	NA	A0A0A7E6D8	Ovary	1
XTXXX_103321	ERAP1	NA	A0A0A7E6I2	CD8+ Tcells;Monocytes;Pancreas	3
XTXXX_103330	ERAP1	NA	A0A0A7E7W5	B cells;CD4+ Tcells;CD8+ Tcells;Colon;Gut;Liver;Monocytes;NK cells;Ovary;Pancreas;Platelets;Prostate;Rectum;Retina	14
XTXXX_103331	ERAP1	NA	A0A0A7E7W9	Adrenal gland;B cells;CD4+ Tcells;CD8+ Tcells;Colon;Liver;Lung;NK cells;Pancreas;Platelets;Prostate;Rectum;Retina;Spinal cord;Testis;Urinary bladder	16
XTXXX_103332	ERAP1	NA	A0A0A7E7X3	B cells;Brain;CD8+ Tcells;Frontal cortex;Heart;Liver;Monocytes;NK cells;Ovary;Placenta;Platelets	11
XTXXX_104306	HLA-A	NA	A0A0F7W082	Adrenal gland;CD4+ Tcells;Frontal cortex;Gall bladder;Gut;Heart;Kidney;Liver;Lung;Pancreas;Placenta;Prostate;Rectum;Retina;Spinal cord;Urinary bladder	16
XTXXX_104983	HLA-B	NA	A0A0K3AQT5	Colon;NK cells;Platelets	3
XTXXX_105362	NA	NA	A0A0P0LIR5	Rectum	1
XTXXX_105368	HLA-C	NA	A0A0P1H7A9	B cells;CD8+ Tcells;Lung;NK cells;Ovary;Platelets;Rectum	7
XTXXX_105461	HLA-DPB1	NA	A0A0S2C2L5	Colon;Lung	2
XTXXX_105464	HLA-DPB1	NA	A0A0S2C388	B cells;CD8+ Tcells;Colon;Monocytes;NK cells	5
XTXXX_105547	APOE	NA	A0A0S2Z3J5	Adrenal gland;B cells;Brain;Colon;Esophagus;Frontal cortex;Gall bladder;Gut;Heart;Kidney;Liver;Lung;Monocytes;Ovary;Pancreas;Placenta;Platelets;Prostate;Rectum;Retina;Spinal cord;Testis;Urinary bladder	23
XTXXX_105556	HEXA	NA	A0A0S2Z3L7	Esophagus	1
XTXXX_105598	APOE	NA	A0A0S2Z3V0	B cells;Esophagus	2
XTXXX_105607	HEXA	NA	A0A0S2Z3X0	Esophagus	1
XTXXX_106361	HLA-A	NA	A0A0U5PUR8	Monocytes;Rectum	2
XTXXX_106853	NA	NA	A0A5E4	Testis	1
XTXXX_106922	HLA-A	NA	A0JKD2	B cells;Gall bladder;Monocytes;Platelets	4
XTXXX_107846	NA	NA	A2NUT2	Adrenal gland;Colon;Esophagus;Gall bladder;Gut;Kidney;Ovary;Pancreas;Prostate;Rectum;Spinal cord;Urinary bladder	12
XTXXX_107857	NA	NA	A2NW98	Esophagus;Gall bladder	2
XTXXX_108620	FLJ45422	NA	A5D8X1	Rectum	1
XTXXX_108978	NA	NA	A6XMH1	Adrenal gland;Brain;CD4+ Tcells;CD8+ Tcells;Colon;Esophagus;Frontal cortex;Gall bladder;Gut;Heart;Kidney;Liver;Lung;Monocytes;NK cells;Ovary;Pancreas;Placenta;Platelets;Prostate;Rectum;Retina;Spinal cord;Testis;Urinary bladder	25
XTXXX_108981	NA	NA	A6XMV6	Frontal cortex;Placenta	2
XTXXX_109425	MANBA	NA	A7LFP5	NK cells	1
XTXXX_109429	NUCB2	NA	A7LNF3	Colon;Liver;Lung;Prostate;Urinary bladder	5
XTXXX_109430	NUCB2	NA	A7LNF4	Monocytes;Ovary;Pancreas;Retina;Testis	5
XTXXX_109431	NUCB2	NA	A7LNF5	Urinary bladder	1
XTXXX_109456	TNC	NA	A7MBN2	Adrenal gland;Brain;Colon;Frontal cortex;Heart;Kidney;Liver;Lung;Pancreas;Prostate;Rectum;Spinal cord;Urinary bladder	13
XTXXX_109696	NA	NA	A8K008	Gut;Lung	2
XTXXX_109708	NA	NA	A8K061	Liver	1
XTXXX_110057	NA	NA	A8K3L0	Monocytes	1
XTXXX_110118	NA	NA	A8K477	Adrenal gland;Colon;Gall bladder;Gut;Lung;Monocytes;Ovary;Pancreas;Platelets;Prostate;Rectum;Urinary bladder	12
XTXXX_110119	NA	NA	A8K479	Liver	1
XTXXX_110136	NA	NA	A8K4C2	Testis	1
XTXXX_110241	NA	NA	A8K5A4	Adrenal gland;Colon;Monocytes;Ovary;Prostate;Spinal cord;Testis;Urinary bladder	8
XTXXX_110373	NA	NA	A8K6D3	Pancreas	1
XTXXX_110377	NA	NA	A8K6G4	Placenta	1
XTXXX_110379	NA	NA	A8K6H1	Brain;Esophagus;Kidney;Placenta;Rectum;Spinal cord;Urinary bladder	7
XTXXX_110524	NA	NA	A8K7T8	Placenta;Spinal cord	2
XTXXX_110530	NA	NA	A8K7V7	Adrenal gland;Colon;Esophagus;Heart;Kidney;Lung;Rectum;Spinal cord	8
XTXXX_110727	NA	NA	A8K9I2	Urinary bladder	1
XTXXX_110833	NA	NA	A8KAK1	Brain;Kidney;Lung;Monocytes;Platelets;Rectum;Urinary bladder	7
XTXXX_110979	UGT1A8	NA	A9JQZ4	Kidney;Liver	2
XTXXX_111167	NA	NA	B0AZL7	Heart;Lung;Monocytes;Testis;Urinary bladder	5
XTXXX_111530	TGFB1	NA	B2C8Z3	Gall bladder;Platelets	2
XTXXX_111683	LTF	NA	B2MV14	CD4+ Tcells;NK cells	2
XTXXX_111773	NA	NA	B2R582	Adrenal gland;Brain;Colon;Esophagus;Gall bladder;Heart;Kidney;Lung;Monocytes;Ovary;Prostate;Retina;Spinal cord;Testis	14
XTXXX_111796	NA	NA	B2R5M9	Heart	1
XTXXX_111897	NA	NA	B2R6S9	Brain;Liver;Ovary;Prostate;Retina	5
XTXXX_112039	NA	NA	B2R815	Adrenal gland;Colon;Gall bladder;Kidney;Monocytes;Ovary;Pancreas;Prostate;Spinal cord;Testis;Urinary bladder	11
XTXXX_112091	NA	NA	B2R8I2	Ovary;Pancreas;Prostate;Testis	4
XTXXX_112155	NA	NA	B2R950	Colon;Gall bladder;Placenta	3
XTXXX_112687	ITIH4	NA	B2RMS9	Adrenal gland;Colon;Gall bladder;Liver;Ovary;Pancreas;Rectum;Spinal cord;Testis;Urinary bladder	10
XTXXX_113724	NA	NA	B3KQQ3	Gall bladder;Lung;Pancreas;Prostate;Rectum	5
XTXXX_113727	NA	NA	B3KQR3	NK cells	1
XTXXX_113739	NA	NA	B3KQT9	Adrenal gland;B cells;Brain;CD4+ Tcells;CD8+ Tcells;Colon;Esophagus;Frontal cortex;Gall bladder;Gut;Heart;Kidney;Liver;Lung;Monocytes;NK cells;Ovary;Pancreas;Placenta;Platelets;Prostate;Rectum;Retina;Spinal cord;Testis;Urinary bladder	26
XTXXX_114382	NA	NA	B3KUP0	Testis	1
XTXXX_114476	NA	NA	B3KVB0	Kidney	1
XTXXX_114607	NA	NA	B3KW79	Adrenal gland;Gut;Heart;Kidney;Lung;NK cells;Ovary;Pancreas;Placenta;Rectum;Testis	11
XTXXX_114718	NA	NA	B3KX16	Ovary	1
XTXXX_114881	NA	NA	B3KXZ9	Adrenal gland;Brain;Esophagus;Kidney;Liver	5
XTXXX_115181	NA	NA	B4DDW4	Pancreas;Prostate	2
XTXXX_115334	NA	NA	B4DEN5	Adrenal gland;Brain;Frontal cortex;Liver;Ovary;Prostate;Retina;Spinal cord	8
XTXXX_115563	NA	NA	B4DFZ4	Heart	1
XTXXX_115686	NA	NA	B4DGN8	Colon;Gall bladder;Liver;Lung;Placenta;Prostate;Urinary bladder	7
XTXXX_115789	NA	NA	B4DHA5	Kidney	1
XTXXX_116197	NA	NA	B4DJQ5	Ovary;Rectum;Retina	3
XTXXX_116443	NA	NA	B4DL49	Adrenal gland;CD8+ Tcells;Gall bladder;Gut;Heart;Kidney;Liver;Lung;Monocytes;Pancreas;Prostate;Rectum;Testis	13
XTXXX_116448	NA	NA	B4DL55	Lung	1
XTXXX_116897	NA	NA	B4DN87	Adrenal gland;Brain;CD4+ Tcells;CD8+ Tcells;Colon;Esophagus;Gall bladder;Gut;Heart;Kidney;Liver;Lung;Monocytes;Ovary;Pancreas;Placenta;Platelets;Prostate;Rectum;Retina;Spinal cord;Testis;Urinary bladder	23
XTXXX_116955	NA	NA	B4DNJ0	Kidney;Testis	2
XTXXX_117004	NA	NA	B4DNS6	Lung;Ovary;Spinal cord	3
XTXXX_117112	NA	NA	B4DPC7	Colon;Pancreas;Prostate	3
XTXXX_117149	NA	NA	B4DPJ4	Adrenal gland;Colon;Esophagus;Gall bladder;Heart;Kidney;Liver;Lung;Monocytes;Ovary;Pancreas;Placenta;Prostate;Spinal cord;Testis;Urinary bladder	16
XTXXX_117173	NA	NA	B4DPN0	Adrenal gland;Colon;Frontal cortex;Gall bladder;Gut;Heart;Kidney;Liver;Lung;Monocytes;Ovary;Pancreas;Platelets;Prostate;Rectum;Testis;Urinary bladder	17
XTXXX_117182	NA	NA	B4DPP4	Adrenal gland;B cells;CD4+ Tcells;CD8+ Tcells;Colon;Frontal cortex;Gall bladder;Gut;Heart;Liver;Lung;Monocytes;NK cells;Ovary;Pancreas;Platelets;Prostate;Rectum;Retina;Spinal cord;Testis;Urinary bladder	22
XTXXX_117185	NA	NA	B4DPQ4	Colon;Gall bladder;Kidney;Monocytes;Rectum;Spinal cord;Urinary bladder	7
XTXXX_117189	NA	NA	B4DPQ9	Liver	1
XTXXX_117322	NA	NA	B4DQJ6	Colon;Frontal cortex;Gut;Prostate;Rectum;Retina;Spinal cord	7
XTXXX_117797	NA	NA	B4DSX2	B cells;Gall bladder;Gut;Ovary;Prostate;Rectum;Urinary bladder	7
XTXXX_117875	NA	NA	B4DTC0	Monocytes	1
XTXXX_118037	NA	NA	B4DU66	Gut;Kidney;Liver;Lung;NK cells;Retina;Spinal cord;Testis;Urinary bladder	9
XTXXX_118380	NA	NA	B4DVZ5	Ovary	1
XTXXX_118389	NA	NA	B4DW09	B cells;CD8+ Tcells;Colon;Liver	4
XTXXX_118556	NA	NA	B4DWX1	Testis	1
XTXXX_118748	NA	NA	B4DY05	Adrenal gland;B cells;Brain;CD4+ Tcells;CD8+ Tcells;Colon;Esophagus;Frontal cortex;Gall bladder;Gut;Heart;Kidney;Liver;Lung;Monocytes;NK cells;Ovary;Pancreas;Platelets;Prostate;Rectum;Retina;Spinal cord;Testis;Urinary bladder	25
XTXXX_118771	NA	NA	B4DY68	Ovary;Testis	2
XTXXX_119083	NA	NA	B4DZX0	Gall bladder;Pancreas	2
XTXXX_119095	NA	NA	B4DZZ4	Gut	1
XTXXX_119321	NA	NA	B4E153	Rectum	1
XTXXX_119353	NA	NA	B4E1B2	Adrenal gland;Brain;Colon;Esophagus;Frontal cortex;Gall bladder;Gut;Heart;Kidney;Liver;Lung;NK cells;Ovary;Pancreas;Placenta;Platelets;Prostate;Rectum;Retina;Spinal cord;Testis;Urinary bladder	22
XTXXX_119375	NA	NA	B4E1F5	Lung	1
XTXXX_119388	NA	NA	B4E1I8	Adrenal gland;Esophagus;Gall bladder;Gut;Heart;Kidney;Liver;Monocytes;Pancreas;Prostate;Rectum;Retina;Spinal cord;Testis;Urinary bladder	15
XTXXX_119403	NA	NA	B4E1L2	Heart;Placenta	2
XTXXX_119499	NA	NA	B4E216	CD8+ Tcells	1
XTXXX_119686	NA	NA	B4E320	Gall bladder;Ovary;Pancreas;Prostate;Testis;Urinary bladder	6
XTXXX_119733	NA	NA	B4E397	Brain;Colon;Gall bladder;Heart;Lung;Monocytes;Ovary;Pancreas;Prostate;Rectum;Retina;Spinal cord;Testis;Urinary bladder	14
XTXXX_119808	NA	NA	B4E3N0	Colon;Gall bladder;Pancreas;Prostate;Rectum;Urinary bladder	6
XTXXX_119976	RAGE	NA	B5A979	Lung	1
XTXXX_119977	HLA-A	NA	B5A9M9	Adrenal gland;B cells;CD4+ Tcells;CD8+ Tcells;Gall bladder;Heart;Kidney;Liver;Lung;Monocytes;NK cells;Ovary;Pancreas;Platelets;Prostate;Rectum;Retina;Spinal cord;Testis;Urinary bladder	20
XTXXX_120266	MUC1	NA	B6ECB2	Esophagus;Kidney;Lung	3
XTXXX_120270	MYOC	NA	B6ECI7	Prostate	1
XTXXX_120604	NA	NA	B7Z1Z4	Frontal cortex	1
XTXXX_120793	NA	NA	B7Z362	Adrenal gland;CD8+ Tcells;Colon;Gall bladder;Heart;Kidney;Liver;NK cells;Ovary;Placenta;Prostate;Rectum;Retina;Spinal cord	14
XTXXX_120878	NA	NA	B7Z3N0	Gut	1
XTXXX_120966	NA	NA	B7Z487	Brain;Testis	2
XTXXX_121057	NA	NA	B7Z4R8	Liver	1
XTXXX_121132	NA	NA	B7Z556	Colon	1
XTXXX_121220	NA	NA	B7Z5Q2	Adrenal gland;Brain;Colon;Esophagus;Frontal cortex;Gall bladder;Gut;Heart;Kidney;Liver;Lung;Monocytes;Ovary;Pancreas;Placenta;Prostate;Rectum;Retina;Spinal cord;Testis;Urinary bladder	21
XTXXX_121471	NA	NA	B7Z747	Adrenal gland;Colon;Heart;Pancreas;Prostate	5
XTXXX_121791	NA	NA	B7Z938	Adrenal gland;Brain;Esophagus;Frontal cortex;Gut;Liver;Lung;Pancreas;Placenta;Platelets;Spinal cord;Urinary bladder	12
XTXXX_122104	CYP2A7	NA	B7ZKR0	Liver	1
XTXXX_122415	HLA-Cw	NA	B8Y4R9	Adrenal gland;B cells;CD4+ Tcells;CD8+ Tcells;Colon;Gall bladder;Gut;Heart;Kidney;Liver;Lung;Monocytes;NK cells;Ovary;Pancreas;Platelets;Prostate;Rectum;Retina;Testis;Urinary bladder	21
XTXXX_122722	NA	NA	C0IMJ3	Gall bladder;Gut;Lung;Rectum;Urinary bladder	5
XTXXX_123011	opn	NA	C4B6Q2	Heart	1
XTXXX_124351	GP9	NA	D1MER8	Monocytes;NK cells;Placenta;Platelets	4
XTXXX_124796	SAA1	NA	D3DQX7	Colon;Heart;Kidney;Liver;Lung;Ovary;Pancreas;Prostate;Spinal cord;Testis;Urinary bladder	11
XTXXX_125059	ABP1	NA	D3DX03	Colon;Gut;Kidney;Placenta;Rectum	5
XTXXX_125104	HLA-B	NA	D3HIE9	CD8+ Tcells	1
XTXXX_125144	NA	NA	D3JV41	B cells;Gall bladder;Gut;Heart;Kidney;Liver;Lung;Monocytes;Placenta;Spinal cord;Testis	11
XTXXX_125784	HLA-A	NA	D5H3V5	Lung;NK cells;Rectum;Testis	4
XTXXX_126171	SEPP1	NA	D6REX5	Colon	1
XTXXX_126172	SEPP1	NA	D6RIS9	Gall bladder	1
XTXXX_126265	HLA-A	NA	D7GN80	Colon;Pancreas	2
XTXXX_126627	HLA-B	NA	D9UAY4	B cells;CD8+ Tcells;Colon;Lung;NK cells;Platelets;Rectum	7
XTXXX_127239	IGF2	NA	E3UN46	Ovary	1
XTXXX_127248	HLA-B	NA	E3VSS8	B cells;CD8+ Tcells;Colon;Lung;NK cells;Platelets	6
XTXXX_127545	GPX3	NA	E5RG32	Adrenal gland;Colon;Esophagus;Gall bladder;Gut;Heart;Kidney;Liver;Lung;Placenta;Prostate;Rectum;Urinary bladder	13
XTXXX_127562	PRF1	NA	E6Y8C6	B cells;CD4+ Tcells;Lung;Urinary bladder	4
XTXXX_127699	HLA-A	NA	E9BVB6	CD8+ Tcells	1
XTXXX_128837	HLA-B	NA	F4YTD8	Colon;Rectum;Testis	3
XTXXX_128844	HLA-B	NA	F4YTE7	CD4+ Tcells;Prostate	2
XTXXX_129281	DHH	NA	F6KSZ4	Ovary;Testis	2
XTXXX_130067	MUC19	NA	G3CIG9	B cells	1
XTXXX_130248	HLA-A	NA	G4Y0P1	NK cells	1
XTXXX_132370	ACE	NA	I6L9B3	Gut;Ovary;Testis	3
XTXXX_133084	HLA-A	NA	K0P0H0	CD4+ Tcells;Platelets	2
XTXXX_134140	VWF	NA	L8E853	Adrenal gland;Colon;Esophagus;Frontal cortex;Gut;Heart;Kidney;Liver;Lung;NK cells;Ovary;Pancreas;Placenta;Platelets;Retina;Spinal cord;Testis	17
XTXXX_135038	HLA;HLA-B	NA	M1GLN3;M9T3Z4	B cells;CD4+ Tcells;CD8+ Tcells;Platelets;Prostate;Rectum	6
XTXXX_135553	NA	NA	O02922	Adrenal gland;B cells;CD4+ Tcells;CD8+ Tcells;Frontal cortex;Gall bladder;Heart;Kidney;Liver;Lung;Monocytes;NK cells;Ovary;Platelets;Prostate;Rectum;Spinal cord;Testis;Urinary bladder	19
XTXXX_136793	S	NA	Q0EFA5	CD8+ Tcells;Lung;NK cells;Urinary bladder	4
XTXXX_136814	NA	NA	Q0GN75	Placenta	1
XTXXX_137210	UGT1J	NA	Q13406	Rectum	1
XTXXX_137296	CD4	NA	Q13969	B cells;Monocytes	2
XTXXX_138000	HLA-A	NA	Q19BJ8	CD4+ Tcells;CD8+ Tcells;Lung;Monocytes;NK cells	5
XTXXX_138006	NA	NA	Q19KS2	Esophagus;Heart;Retina;Testis	4
XTXXX_138208	CD177	NA	Q1T7A3	Prostate	1
XTXXX_138240	HLA-C	NA	Q1XDY2	CD4+ Tcells;Liver;Retina;Urinary bladder	4
XTXXX_138426	NA	NA	Q29849	B cells;CD8+ Tcells;NK cells	3
XTXXX_138877	NA	NA	Q2TUW9	Adrenal gland;B cells;Gall bladder;Kidney;Liver;Lung;Prostate;Rectum;Urinary bladder	9
XTXXX_139040	HLA-DPB1	NA	Q30059	Rectum	1
XTXXX_139567	PRSS1	NA	Q3SY19	Gut	1
XTXXX_140424	UGT1A9	NA	Q4R0Z6	Kidney	1
XTXXX_140799	UGT1A9	NA	Q53E75	Colon;Esophagus;Liver	3
XTXXX_140853	NA	NA	Q53EX3	Gall bladder;Gut;Liver;Retina	4
XTXXX_140877	NA	NA	Q53F26	Pancreas	1
XTXXX_140963	NA	NA	Q53FJ5	Testis	1
XTXXX_141004	NA	NA	Q53FV4	Retina	1
XTXXX_141055	NA	NA	Q53G64	Colon;Gall bladder;Gut;Heart;Lung;Pancreas;Prostate;Rectum;Urinary bladder	9
XTXXX_141169	NA	NA	Q53GX6	Brain;Placenta	2
XTXXX_141182	NA	NA	Q53GZ8	Lung	1
XTXXX_141183	NA	NA	Q53H01	B cells;CD4+ Tcells;Gall bladder;Gut;Heart;Kidney;Monocytes;NK cells;Retina;Spinal cord	10
XTXXX_141287	NA	NA	Q53HP3	Adrenal gland;Ovary;Prostate	3
XTXXX_141722	IGL@	NA	Q567P1	Ovary	1
XTXXX_141733	NA	NA	Q569I7	Pancreas	1
XTXXX_142023	NA	NA	Q59EY0	Adrenal gland	1
XTXXX_142472	NA	NA	Q59GM9	Brain;Esophagus;Frontal cortex;Heart;Ovary;Placenta;Platelets;Rectum;Retina	9
XTXXX_142700	TRA1	NA	Q5CAQ5	Adrenal gland;B cells;Brain;CD4+ Tcells;CD8+ Tcells;Colon;Esophagus;Frontal cortex;Gall bladder;Gut;Heart;Kidney;Liver;Lung;Monocytes;NK cells;Ovary;Pancreas;Placenta;Platelets;Prostate;Rectum;Retina;Spinal cord;Testis;Urinary bladder	26
XTXXX_142718	DKFZp781M0386	NA	Q5CZ94	Colon;Pancreas;Prostate;Testis;Urinary bladder	5
XTXXX_142769	NA	NA	Q5EFE6	B cells	1
XTXXX_142780	NA	NA	Q5EK51	Adrenal gland;Rectum	2
XTXXX_142814	IGL@	NA	Q5FWF9	Colon;Testis	2
XTXXX_143068	HLA-A	NA	Q5ND69	Urinary bladder	1
XTXXX_143367	HLA-B	NA	Q5UAG1	B cells;CD8+ Tcells;Colon;Liver;Lung;NK cells;Platelets;Rectum	8
XTXXX_143404	HLA-B	NA	Q5W3L5	B cells;CD8+ Tcells;Monocytes;NK cells	4
XTXXX_143787	HMFT1766	NA	Q68CK4	Colon;Lung;Ovary	3
XTXXX_143791	DKFZp686E23209	NA	Q68CN4	Esophagus	1
XTXXX_144081	DKFZp686A03134	NA	Q6AWA9	Adrenal gland;Brain;Colon;Gut;Heart;Liver;Lung;Ovary;Pancreas;Prostate;Rectum;Testis;Urinary bladder	13
XTXXX_144335	NA	NA	Q6GMV8	Frontal cortex	1
XTXXX_144336	IGL@	NA	Q6GMW3	Adrenal gland;Gall bladder;Lung	3
XTXXX_144342	IGH@	NA	Q6GMX6	Gall bladder;Lung;Prostate;Urinary bladder	4
XTXXX_144457	CST6	NA	Q6IBD2	Gut;Prostate	2
XTXXX_144569	SEMG2	NA	Q6IRW3	Prostate;Urinary bladder	2
XTXXX_144589	HLA-A	NA	Q6IUZ5	CD8+ Tcells;Lung;NK cells;Platelets	4
XTXXX_144591	HLA-A	NA	Q6IV49	Prostate	1
XTXXX_144600	GH1	NA	Q6IYF0	Esophagus	1
XTXXX_144708	NA	NA	Q6LA97	Colon;Prostate;Urinary bladder	3
XTXXX_144726	COL1A1	NA	Q6LAN8	Adrenal gland;Brain;Colon;Esophagus;Frontal cortex;Gall bladder;Gut;Heart;Kidney;Liver;Lung;Ovary;Pancreas;Placenta;Prostate;Rectum;Spinal cord;Testis;Urinary bladder	19
XTXXX_144747	H	NA	Q6LBM9	Adrenal gland;Colon;Gall bladder;Heart;Kidney;Liver;Lung;Monocytes;Ovary;Pancreas;Placenta;Prostate;Retina;Spinal cord;Testis;Urinary bladder	16
XTXXX_144858	PTGIS	NA	Q6LEN2	Esophagus;Gall bladder;Heart;Ovary;Pancreas;Prostate	6
XTXXX_144948	DKFZp686C11235	NA	Q6MZV7	Gall bladder	1
XTXXX_144992	DKFZp686I15196	NA	Q6N096	Adrenal gland;Lung	2
XTXXX_145005	IGL@	NA	Q6NS95	Ovary;Placenta;Retina	3
XTXXX_145147	TPSB2	NA	Q6NZY1	Lung	1
XTXXX_145245	IGK@	NA	Q6P5S8	Adrenal gland;Colon;Esophagus;Gall bladder;Gut;Heart;Kidney;Lung;NK cells;Pancreas;Placenta;Platelets;Prostate;Rectum;Retina;Spinal cord;Testis;Urinary bladder	18
XTXXX_145341	IGK@	NA	Q6PIL8	Colon;Gall bladder;Prostate;Testis	4
XTXXX_145352	IGL@	NA	Q6PIQ7	Rectum	1
XTXXX_145406	IGK@	NA	Q6PJF2	Adrenal gland;B cells;Frontal cortex;Heart;Kidney;Liver;Lung;NK cells;Ovary;Pancreas;Rectum;Retina;Urinary bladder	13
XTXXX_145463	PRSS2	NA	Q6PK75	Gall bladder;Prostate;Rectum	3
XTXXX_145503	HLA-A	NA	Q6PW03	Frontal cortex;Liver;Prostate;Spinal cord;Urinary bladder	5
XTXXX_146575	NA	NA	Q6ZTY7	Brain;Frontal cortex;Ovary;Retina;Spinal cord;Testis	6
XTXXX_146715	NA	NA	Q6ZW64	Adrenal gland;B cells;Colon;Esophagus;Frontal cortex;Gall bladder;Gut;Heart;Kidney;Liver;Lung;Ovary;Pancreas;Placenta;Platelets;Prostate;Rectum;Retina;Spinal cord;Testis;Urinary bladder	21
XTXXX_147578	NA	NA	Q7Z2U7	Gall bladder;Prostate;Rectum	3
XTXXX_147611	DKFZp686N02209	NA	Q7Z351	Adrenal gland;Colon;Esophagus;Heart;Kidney;Lung;Ovary;Pancreas;Prostate;Rectum;Testis;Urinary bladder	12
XTXXX_147677	NA	NA	Q7Z3Y4	Urinary bladder	1
XTXXX_147696	PVRL2	NA	Q7Z458	Placenta;Spinal cord	2
XTXXX_147809	MUC1	NA	Q7Z542	Rectum	1
XTXXX_147994	APOB	NA	Q7Z7Q0	Adrenal gland;Brain;Colon;Esophagus;Frontal cortex;Gall bladder;Gut;Heart;Kidney;Liver;Lung;Monocytes;Ovary;Pancreas;Placenta;Platelets;Prostate;Rectum;Spinal cord;Testis;Urinary bladder	21
XTXXX_148096	HLA-B	NA	Q861B6	Adrenal gland;B cells;CD4+ Tcells;CD8+ Tcells;Colon;Frontal cortex;Gall bladder;Gut;Heart;Kidney;Liver;Lung;Monocytes;NK cells;Ovary;Pancreas;Placenta;Platelets;Prostate;Rectum;Retina;Testis;Urinary bladder	23
XTXXX_148208	TPSAB1	NA	Q86TM8	Colon;Esophagus;Gall bladder;Lung;Ovary;Pancreas;Prostate;Rectum;Testis;Urinary bladder	10
XTXXX_148313	FBLN2	NA	Q86V58	Gall bladder;Heart;Liver;Lung;Ovary;Prostate;Rectum;Urinary bladder	8
XTXXX_148664	NID2	NA	Q8IV28	Retina	1
XTXXX_148671	SERPIND1	NA	Q8IVC0	Kidney;Pancreas;Placenta	3
XTXXX_148758	NA	NA	Q8IX02	Adrenal gland;B cells;Colon;Gall bladder;Gut;Heart;Kidney;Liver;Lung;Monocytes;NK cells;Ovary;Pancreas;Placenta;Platelets;Prostate;Rectum	17
XTXXX_148965	HLA-A	NA	Q8MHN8	CD4+ Tcells;CD8+ Tcells;Ovary;Platelets;Prostate;Rectum;Testis	7
XTXXX_149040	NA	NA	Q8N2D6	Gall bladder;Gut;Kidney;Lung	4
XTXXX_149091	IGL@	NA	Q8N355	B cells;Colon;Kidney;Liver;Ovary;Placenta;Rectum;Retina;Spinal cord;Testis	10
XTXXX_149146	SPARCL1	NA	Q8N4S1	Frontal cortex	1
XTXXX_149178	IGL@	NA	Q8N5F4	Placenta	1
XTXXX_150010	IGFALS	NA	Q8TAY0	CD8+ Tcells;Colon;Esophagus;Ovary;Prostate	5
XTXXX_150074	LBP	NA	Q8TCF0	Adrenal gland;Colon;Esophagus;Gall bladder;Gut;Heart;Kidney;Liver;Lung;Monocytes;Ovary;Pancreas;Placenta;Platelets;Prostate;Rectum;Retina;Spinal cord;Testis;Urinary bladder	20
XTXXX_150466	NA	NA	Q8WWJ8	Adrenal gland;B cells;CD4+ Tcells;CD8+ Tcells;Colon;Gall bladder;Liver;Lung;Monocytes;NK cells;Ovary;Placenta;Platelets;Prostate;Rectum;Retina;Spinal cord;Testis	18
XTXXX_150759	FCN1	NA	Q92531	B cells;Monocytes;NK cells	3
XTXXX_150793	MANB	NA	Q93093	CD8+ Tcells;Monocytes;NK cells;Ovary;Pancreas;Rectum	6
XTXXX_150879	C2	NA	Q95IG1	Kidney;Rectum	2
XTXXX_151040	NA	NA	Q96DK0	Colon	1
XTXXX_151289	NA	NA	Q96K68	Rectum	1
XTXXX_151579	tryptaseC	NA	Q96RZ6	Esophagus;Gall bladder;Lung	3
XTXXX_151580	tryptaseB	NA	Q96RZ7	Pancreas	1
XTXXX_153091	NA	NA	Q9NP29	Gall bladder;NK cells;Spinal cord;Urinary bladder	4
XTXXX_153119	NA	NA	Q9NPR5	B cells;Brain;CD4+ Tcells;CD8+ Tcells;Frontal cortex;Gall bladder;Gut;Kidney;Liver;Lung;NK cells;Pancreas;Platelets;Prostate;Retina	15
XTXXX_153876	HLA-B	NA	Q9TPU9	Adrenal gland;Gall bladder;Heart;Kidney;Ovary;Testis;Urinary bladder	7
XTXXX_154041	CYP2C9	NA	Q9UEH3	Liver	1
XTXXX_154709	NA	NA	Q9Y354	Kidney	1
XTXXX_155359	HLA-B	NA	S5LSK2	Testis	1
XTXXX_155389	CYP2C9	NA	S5RV29	Liver	1
XTXXX_155415	HLA-C	NA	S6AP29	Adrenal gland;B cells;CD4+ Tcells;CD8+ Tcells;Colon;Frontal cortex;Gall bladder;Gut;Heart;Kidney;Liver;Lung;Monocytes;NK cells;Ovary;Pancreas;Platelets;Prostate;Rectum;Retina;Spinal cord;Testis;Urinary bladder	23
XTXXX_155422	NA	NA	S6AWD6	Adrenal gland;B cells;Brain;CD4+ Tcells;CD8+ Tcells;Colon;Esophagus;Frontal cortex;Gut;Heart;Kidney;Liver;Lung;Monocytes;NK cells;Ovary;Pancreas;Placenta;Platelets;Prostate;Rectum;Retina;Spinal cord;Testis;Urinary bladder	25
XTXXX_155423	NA	NA	S6AWD9	Adrenal gland;B cells;Brain;CD4+ Tcells;CD8+ Tcells;Colon;Esophagus;Frontal cortex;Gall bladder;Gut;Heart;Kidney;Liver;Lung;Monocytes;NK cells;Ovary;Pancreas;Placenta;Platelets;Prostate;Rectum;Retina;Spinal cord;Testis;Urinary bladder	26
XTXXX_155432	NA	NA	S6B291	Gall bladder;Liver;Lung;Ovary;Urinary bladder	5
XTXXX_155434	NA	NA	S6B2A1	Esophagus;Gall bladder;Gut;Kidney;Lung;Placenta;Platelets;Rectum;Spinal cord;Urinary bladder	10
XTXXX_155448	NA	NA	S6BAN6	Adrenal gland;Brain;Colon;Esophagus;Gall bladder;Gut;Heart;Kidney;Lung;Ovary;Pancreas;Placenta;Platelets;Prostate;Rectum;Spinal cord;Testis;Urinary bladder	18
XTXXX_155449	NA	NA	S6BAP0	Adrenal gland;B cells;Colon;Esophagus;Frontal cortex;Gall bladder;Heart;Kidney;Liver;Lung;Ovary;Pancreas;Prostate;Rectum;Retina;Spinal cord;Testis;Urinary bladder	18
XTXXX_155451	NA	NA	S6BAP8	Gut;Heart;Ovary;Placenta	4
XTXXX_155458	NA	NA	S6BGD6	Adrenal gland;Colon;Esophagus;Gall bladder;Gut;Heart;Kidney;Lung;Pancreas;Placenta;Platelets;Prostate;Rectum;Spinal cord;Testis;Urinary bladder	16
XTXXX_155463	NA	NA	S6BGF9	Adrenal gland;Colon;Esophagus;Gall bladder;Gut;Kidney;Lung;Ovary;Pancreas;Prostate;Rectum;Retina;Spinal cord;Testis;Urinary bladder	15
XTXXX_155475	NA	NA	S6C4Q9	B cells;Esophagus;Gall bladder;Gut;Heart;Kidney;Liver;Ovary;Placenta;Platelets;Retina;Spinal cord	12
XTXXX_155477	NA	NA	S6C4R6	Adrenal gland;Colon;Frontal cortex;Heart;Liver;NK cells;Ovary;Prostate;Testis	9
XTXXX_155908	HLA-B	NA	U4N162	B cells	1
XTXXX_156686	HLA-C	NA	V5NQS1	B cells;CD4+ Tcells;CD8+ Tcells;Lung;NK cells;Platelets;Prostate;Rectum;Testis	9
XTXXX_157038	HEL-213	NA	V9HW34	Adrenal gland;Colon;Esophagus;Gall bladder;Gut;Kidney;Lung;Ovary;Placenta;Platelets;Prostate;Rectum;Spinal cord;Testis;Urinary bladder	15
XTXXX_157048	HEL-S-300	NA	V9HW76	Prostate	1
XTXXX_157057	HEL-S-39	NA	V9HWC6	Adrenal gland;B cells;Brain;CD4+ Tcells;CD8+ Tcells;Colon;Esophagus;Frontal cortex;Gall bladder;Gut;Heart;Kidney;Liver;Lung;Monocytes;NK cells;Ovary;Pancreas;Placenta;Platelets;Prostate;Rectum;Retina;Spinal cord;Testis;Urinary bladder	26
XTXXX_157349	RAF1	NA	W0UUR6	Adrenal gland;B cells;CD4+ Tcells;CD8+ Tcells;Colon;Gall bladder;Lung;Monocytes;NK cells;Ovary;Pancreas;Platelets;Prostate;Rectum;Spinal cord;Testis;Urinary bladder	17
XTXXX_157443	HLA-B	NA	W6N8T7	Heart;Ovary;Rectum;Testis;Urinary bladder	5
XTXXX_157540	NA	NA	W8QEY1	Colon;Platelets	2
XTXXX_157734	HLA-DPB1	NA	X5CF76	Gut	1
XXREA_044654	APOA4	NA	NA	Adrenal gland;Heart;Kidney;Monocytes;Pancreas;Urinary bladder	6
XXREA_044699	GC	NA	NA	Gut;Liver;Lung;Monocytes;Ovary;Rectum;Retina;Testis	8
XXREA_044743	ORM1;ORM2	NA	NA	Adrenal gland;CD4+ Tcells;Colon;Gall bladder;Liver;Ovary;Pancreas;Prostate;Rectum;Retina;Spinal cord;Testis	12
XXREX_090340	COL1A1	NA	NA	Colon;Esophagus;Gall bladder;Gut;Lung;Ovary;Pancreas;Placenta;Prostate;Rectum;Spinal cord;Testis;Urinary bladder	13
XXREX_090522	ZG16	NA	NA	Rectum	1
XXREX_090564	UGT2A1	NA	NA	Liver	1
XXRXA_090700	ANGPTL2	NA	NA	Colon;Pancreas;Prostate;Rectum;Spinal cord;Testis	6
XXRXA_090936	C5	NA	NA	Gut;Pancreas;Placenta;Rectum	4
XXRXA_090953	C8A	NA	NA	Ovary	1
XXRXA_091074	CFHR2	NA	NA	Adrenal gland;Gall bladder;Liver;Ovary;Pancreas;Prostate;Testis;Urinary bladder	8
XXRXA_091079	CHI3L1	NA	NA	Kidney;Liver;Monocytes	3
XXRXA_091115	CNTFR	NA	NA	Brain;Frontal cortex;Gut;Heart;Ovary;Retina;Spinal cord;Testis	8
XXRXA_091183	CYP3A5	NA	NA	Liver	1
XXRXA_091412	FGB	NA	NA	Colon;Gut;Heart;Liver;Placenta;Platelets;Rectum	7
XXRXA_092114	PDIA4	NA	NA	Liver	1
XXRXA_092907	VIP	NA	NA	Esophagus	1
XXRXX_158019	A2M	NA	NA	Esophagus;Heart;Kidney;Liver;Ovary;Pancreas;Placenta;Prostate	8
XXRXX_158034	SAA1	NA	NA	Monocytes;Retina	2
XXRXX_158046	VWF	NA	NA	Gall bladder	1
XXRXX_158085	NRP1	NA	NA	Adrenal gland;Brain;Colon;Gut;Heart;Liver;Lung;Ovary;Pancreas;Placenta;Prostate;Rectum;Testis;Urinary bladder	14
XXRXX_158118	LAMA2	NA	NA	Adrenal gland;Esophagus;Frontal cortex;Gall bladder;Heart;Lung;Ovary;Pancreas;Placenta;Prostate;Rectum;Spinal cord;Urinary bladder	13
XXRXX_158233	FAM180B	NA	NA	Urinary bladder	1
XXRXX_160127	SEMA4B	NA	NA	Ovary	1
XXRXX_160501	A2ML1	NA	NA	Esophagus;Urinary bladder	2
XXRXX_160506	ZG16	NA	NA	Colon	1
XXRXX_160875	COL6A3	NA	NA	Esophagus;Gall bladder;Rectum	3
XXRXX_160876	COL6A3	NA	NA	Frontal cortex	1
XXRXX_161190	PLOD2	NA	NA	Colon;Pancreas;Prostate;Retina	4
XXRXX_161308	BST1	NA	NA	Gut;Lung;Monocytes;Ovary;Testis;Urinary bladder	6
XXRXX_161378	ARSB	NA	NA	Gut;Liver;Platelets	3
XXRXX_162384	KDELC1	NA	NA	CD4+ Tcells;CD8+ Tcells;Gall bladder;Gut;Liver;NK cells;Retina;Testis	8
XXRXX_162699	DPEP2	NA	NA	Ovary	1
XXRXX_162883	COL1A1	NA	NA	Adrenal gland;Brain;Frontal cortex;Heart;Kidney;Liver	6
XXRXX_163173	CADM4	NA	NA	Kidney;Liver;Testis	3
XXRXX_163231	PVR	NA	NA	Adrenal gland;Lung;Testis	3
XXRXX_163339	NCAN	NA	NA	Spinal cord	1
XXRXX_163708	SERPINA7	NA	NA	Prostate	1
XXRXX_164116	LTBP1	NA	NA	Gall bladder;NK cells;Ovary;Placenta;Platelets;Prostate;Testis;Urinary bladder	8
XXRXX_164312	ITIH3	NA	NA	Colon	1
XXRXX_164685	LAMA2	NA	NA	Adrenal gland;Esophagus;Gall bladder;Gut;Heart;Liver;Ovary;Pancreas;Placenta;Prostate;Rectum;Spinal cord;Urinary bladder	13
XXRXX_164755	NID2	NA	NA	Adrenal gland;Gall bladder;Heart;Prostate;Urinary bladder	5
XXRXX_165186	CRTAC1	NA	NA	Frontal cortex;Monocytes;Prostate;Spinal cord	4
XXRXX_165254	PLA2G12B	NA	NA	Gut	1
XXRXX_166312	HSPG2	NA	NA	Heart	1
XXRXX_166314	HSPG2	NA	NA	Adrenal gland;Colon;Gall bladder;Liver;Lung;Ovary;Prostate;Rectum;Spinal cord;Testis;Urinary bladder	11
XXRXX_166783	NRXN1	NA	NA	Brain;Frontal cortex	2
XXRXX_167232	CP	NA	NA	Adrenal gland;Lung;Monocytes;Spinal cord;Urinary bladder	5
XXRXX_167233	CP	NA	NA	Platelets	1
XXRXX_167277	MFI2	NA	NA	Gut	1
XXRXX_167411	GC	NA	NA	Adrenal gland;Colon;Esophagus;Gall bladder;Heart;Kidney;Liver;Lung;Monocytes;Pancreas;Placenta;Prostate;Rectum;Spinal cord;Urinary bladder	15
XXRXX_167425	CFI	NA	NA	Adrenal gland;Colon;Esophagus;Gall bladder;Heart;Kidney;Liver;Lung;Monocytes;Ovary;Pancreas;Prostate;Rectum;Spinal cord;Testis;Urinary bladder	16
XXRXX_167663	HLA-DQA1	NA	NA	B cells;CD8+ Tcells;Colon;Liver;Lung;Monocytes;NK cells;Ovary	8
XXRXX_167691	COL21A1	NA	NA	Gut;Heart;Testis	3
XXRXX_168190	FCN2	NA	NA	Adrenal gland;Esophagus;Liver;Lung	4
XXRXX_168216	TNC	NA	NA	Brain;Colon;Frontal cortex;Liver;Prostate;Rectum;Spinal cord	7
XXRXX_168217	TNC	NA	NA	Esophagus;Kidney;Lung	3
XXRXX_168378	FUT11	NA	NA	Heart;Ovary;Testis	3
XXRXX_169346	ITGAM	NA	NA	B cells;CD4+ Tcells;CD8+ Tcells;Colon;Gall bladder;Liver;Lung;Monocytes;NK cells;Ovary;Pancreas;Placenta;Platelets;Prostate;Rectum;Spinal cord;Testis;Urinary bladder	18
XXRXX_169980	SIRPA	NA	NA	B cells;CD8+ Tcells;Frontal cortex;Lung;NK cells;Retina;Spinal cord	7
XXRXX_169981	SIRPA	NA	NA	Heart	1
XXRXX_170017	CBLN4	NA	NA	Frontal cortex	1
XXRXX_170295	PLXNA3	NA	NA	Brain	1
XXRXX_171508	PAPPA2	NA	NA	Placenta	1
XXRXX_171840	DHRS9	NA	NA	Lung	1
XXRXX_171917	COL6A3	NA	NA	Colon;Gall bladder;Gut;Heart;Liver;Lung;Ovary;Pancreas;Prostate;Rectum;Testis;Urinary bladder	12
XXRXX_171918	COL6A3	NA	NA	Retina	1
XXRXX_172313	LRP2	NA	NA	Spinal cord	1
XXRXX_173200	COL6A5	NA	NA	Gut;Lung;Prostate;Urinary bladder	4
XXRXX_173339	MFI2	NA	NA	Frontal cortex;Gall bladder;Ovary;Prostate;Retina;Spinal cord;Testis	7
XXRXX_174720	FKBP9	NA	NA	Gut;Heart;Liver;Ovary;Pancreas;Placenta;Prostate;Retina;Testis	9
XXRXX_174752	AGR3	NA	NA	Colon;Gut	2
XXRXX_174756	AEBP1	NA	NA	Adrenal gland;Colon;Gut;Heart;Kidney;Lung;Rectum;Spinal cord	8
XXRXX_174857	AOAH	NA	NA	B cells	1
XXRXX_174861	AOAH	NA	NA	NK cells	1
XXRXX_176347	FREM1	NA	NA	Heart	1
XXRXX_176349	FREM1	NA	NA	Heart	1
XXRXX_176858	TOR2A	NA	NA	Liver;Ovary;Testis	3
XXRXX_176904	TNC	NA	NA	Gall bladder	1
XXRXX_176905	TNC	NA	NA	Gut;Lung	2
XXRXX_176907	TNC	NA	NA	Gut;Heart;Spinal cord;Urinary bladder	4
XXRXX_177590	CUBN	NA	NA	Gut	1
XXRXX_178175	PZP	NA	NA	Colon;Liver;Monocytes;Pancreas	4
XXRXX_178325	GPC5	NA	NA	Brain	1
XXRXX_178327	GPC5	NA	NA	Frontal cortex	1
XXRXX_178363	KDELC1	NA	NA	Ovary	1
XXRXX_179151	DNASE1	NA	NA	Gut;Pancreas;Prostate	3
XXRXX_179536	CLEC18C	NA	NA	Kidney	1
XXRXX_180577	ITGA2B	NA	NA	B cells;CD8+ Tcells;Liver;Lung;NK cells;Placenta;Platelets	7
XXRXX_180675	SDK2	NA	NA	Heart	1
XXRXX_180803	SGCA	NA	NA	Heart	1
XXRXX_182035	PVRL2	NA	NA	Gut;Heart;Ovary;Pancreas;Retina	5
XXRXX_182561	PRTN3	NA	NA	Ovary;Spinal cord;Testis;Urinary bladder	4
XXRXX_183124	SIRPB1	NA	NA	Adrenal gland;Brain;Frontal cortex;Liver;Lung;Monocytes;NK cells;Retina;Spinal cord;Testis	10
XXRXX_183210	SIRPG	NA	NA	CD4+ Tcells;CD8+ Tcells	2
XXRXX_183236	SIGLEC1	NA	NA	Lung;Pancreas;Rectum	3
XXRXX_183339	POFUT2	NA	NA	Adrenal gland;Testis	2
XXRXX_185266	LTBP1	NA	NA	Platelets;Urinary bladder	2
XXRXX_185268	LTBP1	NA	NA	B cells;CD8+ Tcells;Heart;Kidney;Liver;NK cells;Ovary;Prostate;Rectum;Testis;Urinary bladder	11
XXRXX_185524	CHL1	NA	NA	Pancreas;Urinary bladder	2
XXRXX_185676	NUP210	NA	NA	Adrenal gland;B cells;Brain;CD4+ Tcells;CD8+ Tcells;Frontal cortex;Gut;Heart;Liver;Monocytes;NK cells;Ovary;Pancreas;Placenta;Prostate;Rectum;Retina;Testis	18
XXRXX_185739	GRM2	NA	NA	Frontal cortex	1
XXRXX_187089	LAMA4	NA	NA	Kidney;Liver;Retina	3
XXRXX_187652	ERO1L	NA	NA	Adrenal gland;B cells;Brain;CD4+ Tcells;CD8+ Tcells;Colon;Esophagus;Frontal cortex;Gall bladder;Gut;Heart;Kidney;Liver;Lung;Monocytes;NK cells;Ovary;Pancreas;Placenta;Platelets;Prostate;Rectum;Retina;Testis;Urinary bladder	25
XXRXX_187964	HHIPL1	NA	NA	NK cells	1
XXRXX_188513	GLIPR1L1	NA	NA	Ovary;Testis	2
XXRXX_188640	KRT3	NA	NA	Adrenal gland;B cells;Brain;CD4+ Tcells;CD8+ Tcells;Colon;Esophagus;Frontal cortex;Gall bladder;Gut;Heart;Kidney;Liver;Lung;Monocytes;NK cells;Ovary;Pancreas;Placenta;Platelets;Prostate;Rectum;Retina;Spinal cord;Testis;Urinary bladder	26
XXRXX_189204	CPXM2	NA	NA	Testis;Urinary bladder	2
XXRXX_189265	FUT11	NA	NA	Heart;Ovary;Testis	3
XXRXX_190366	CELA3B	NA	NA	Pancreas	1
XXRXX_190477	HSPG2	NA	NA	Heart	1
XXRXX_190478	HSPG2	NA	NA	Adrenal gland;Colon;Esophagus;Frontal cortex;Gall bladder;Gut;Kidney;Liver;Lung;Ovary;Pancreas;Placenta;Prostate;Rectum;Retina;Spinal cord;Testis;Urinary bladder	18
XXRXX_191744	ARSB	NA	NA	B cells;Brain;Heart;Kidney;Liver;Monocytes;Prostate;Retina;Testis	9
XXRXX_191762	PAM	NA	NA	Adrenal gland;Frontal cortex;Heart;Pancreas	4
XXRXX_191935	ADGRV1	NA	NA	Retina	1
XXRXX_191948	P4HA2	NA	NA	Colon;Gall bladder;Gut;Heart;Liver;Lung;Placenta;Retina;Urinary bladder	9
XXRXX_192285	LEFTY2	NA	NA	Colon;Ovary;Pancreas	3
XXRXX_192388	HTRA4	NA	NA	Placenta	1
XXRXX_193048	ARSE	NA	NA	Liver	1
XXRXX_193894	FCGBP	NA	NA	Lung	1
XXXEA_093091	CP	NA	NA	Colon;Ovary;Prostate;Testis	4
XXXEX_194153	TNXB	NA	NA	Prostate;Rectum;Spinal cord	3
XXXEX_194211	TNXB	NA	NA	Prostate;Rectum;Spinal cord	3
XXXEX_194220	HLA-DPB1	NA	NA	Adrenal gland;B cells;Lung;Monocytes;Pancreas	5
XXXEX_194336	TNXB	NA	NA	Gall bladder;Heart;Kidney;Liver;Prostate;Rectum	6
XXXEX_194571	GPX3	NA	NA	Ovary;Retina;Spinal cord;Testis	4
XXXEX_194697	TNXB	NA	NA	Kidney;Ovary;Placenta	3
XXXEX_194698	TNXB	NA	NA	Adrenal gland;Colon;Esophagus;Gall bladder;Heart;Liver;Lung;Ovary;Pancreas;Testis;Urinary bladder	11
XXXEX_194704	GABBR1	NA	NA	Brain;Frontal cortex	2
XXXEX_194752	CES1	NA	NA	Esophagus;Gut;Monocytes;Placenta;Spinal cord	5
XXXEX_194769	CES1	NA	NA	Monocytes	1
XXXXA_195693	AOC1	NA	NA	Colon;Gut;Kidney;Placenta;Rectum	5
XXXXA_195694	AOC1	NA	NA	Colon;Gut;Kidney;Placenta;Prostate;Rectum	6
XXXXA_195764	ACACB	NA	NA	Brain;Colon;Prostate;Retina;Testis;Urinary bladder	6
XXXXA_195765	NA	NA	NA	Adrenal gland;Brain;CD8+ Tcells;Colon;Frontal cortex;Gall bladder;Heart;Ovary;Prostate;Rectum;Retina;Spinal cord;Testis;Urinary bladder	14
XXXXA_196209	ACRBP;LPAR5	NA	NA	Ovary;Testis	2
XXXXA_196606	ADAM10	NA	NA	Adrenal gland;Brain;CD4+ Tcells;Esophagus;Heart;Kidney;Liver;Urinary bladder	8
XXXXA_196612	ADAM10	NA	NA	B cells;CD8+ Tcells;NK cells;Ovary	4
XXXXA_197482	AGFG1	NA	NA	Adrenal gland;B cells;Brain;CD4+ Tcells;CD8+ Tcells;Colon;Frontal cortex;Gut;Heart;Liver;Lung;Monocytes;NK cells;Ovary;Platelets;Prostate;Rectum;Retina;Spinal cord;Testis;Urinary bladder	21
XXXXA_197730	AHSG	NA	NA	Adrenal gland;Colon;Esophagus;Gall bladder;Gut;Heart;Kidney;Liver;Lung;Monocytes;Ovary;Prostate;Rectum;Retina;Spinal cord;Testis;Urinary bladder	17
XXXXA_197731	AHSG	NA	NA	Adrenal gland;Esophagus;Gall bladder;Gut;Kidney;Lung;Monocytes;Pancreas;Placenta;Prostate;Rectum;Testis;Urinary bladder	13
XXXXA_197732	AHSG	NA	NA	Brain;Frontal cortex;Heart;Liver;NK cells;Ovary;Platelets;Retina;Spinal cord	9
XXXXA_198124	ALB	NA	NA	Adrenal gland;B cells;Brain;CD4+ Tcells;CD8+ Tcells;Colon;Esophagus;Frontal cortex;Gall bladder;Gut;Heart;Kidney;Liver;Lung;Monocytes;NK cells;Ovary;Pancreas;Placenta;Platelets;Prostate;Rectum;Retina;Spinal cord;Testis;Urinary bladder	26
XXXXA_198131	ALB	NA	NA	CD8+ Tcells	1
XXXXA_198558	AMBP	NA	NA	Heart;Testis	2
XXXXA_198560	AMBP	NA	NA	Adrenal gland;Brain;Colon;Esophagus;Gall bladder;Heart;Kidney;Liver;Lung;Monocytes;Ovary;Pancreas;Placenta;Platelets;Prostate;Rectum;Retina;Spinal cord;Testis;Urinary bladder	20
XXXXA_198706	AMY1A;AMY1B;AMY1C	NA	NA	Gall bladder;Rectum;Spinal cord;Testis;Urinary bladder	5
XXXXA_198707	AMY1A;AMY1B;AMY1C	NA	NA	Esophagus;Gall bladder;Rectum	3
XXXXA_200039	APOA1	NA	NA	Gut;Heart	2
XXXXA_200040	APOA1	NA	NA	CD8+ Tcells	1
XXXXA_200088	APOE	NA	NA	B cells;Esophagus	2
XXXXA_200091	APOF	NA	NA	Monocytes;Ovary;Placenta;Prostate;Urinary bladder	5
XXXXA_201421	ASAH1	NA	NA	CD4+ Tcells;Gut;Heart;Monocytes;NK cells;Ovary;Pancreas;Rectum;Spinal cord	9
XXXXA_202978	AZGP1;GJC3	NA	NA	Adrenal gland;CD8+ Tcells;Colon;Esophagus;Gall bladder;Heart;Kidney;Liver;Lung;Monocytes;NK cells;Ovary;Pancreas;Prostate;Rectum;Retina;Spinal cord;Testis;Urinary bladder	19
XXXXA_204453	BIN1	NA	NA	Testis	1
XXXXA_206240	BSG	NA	NA	Brain;CD8+ Tcells;Colon;Frontal cortex;Gut;Heart;Kidney;Liver;NK cells;Ovary;Pancreas;Placenta;Platelets;Prostate;Rectum;Retina;Spinal cord;Testis;Urinary bladder	19
XXXXA_206245	BSG	NA	NA	Brain;CD8+ Tcells;Colon;Frontal cortex;Gut;Heart;Kidney;Liver;NK cells;Ovary;Pancreas;Platelets;Prostate;Rectum;Retina;Spinal cord;Testis;Urinary bladder	18
XXXXA_206354	BTN2A2;BTN3A1	NA	NA	CD4+ Tcells;CD8+ Tcells	2
XXXXA_207874	C16orf89	NA	NA	Heart	1
XXXXA_208922	C1QB	NA	NA	Esophagus;Pancreas;Placenta;Retina	4
XXXXA_208968	C1QTNF6;IL2RB	NA	NA	NK cells	1
XXXXA_208983	C1RL	NA	NA	Gall bladder;Liver;Testis	3
XXXXA_209941	C5	NA	NA	Lung;Platelets;Retina	3
XXXXA_211283	CALR	NA	NA	B cells;CD4+ Tcells;CD8+ Tcells;Colon;Esophagus;Frontal cortex;Gall bladder;Kidney;Lung;NK cells;Pancreas;Prostate;Rectum;Spinal cord;Urinary bladder	15
XXXXA_213438	CD177	NA	NA	Prostate	1
XXXXA_213539	CD300LF	NA	NA	Monocytes	1
XXXXA_213580	CD3D;MPZL2	NA	NA	Esophagus;Lung	2
XXXXA_213656	CD4	NA	NA	CD4+ Tcells	1
XXXXA_213817	CD99	NA	NA	CD8+ Tcells;Ovary;Prostate;Rectum;Retina;Spinal cord;Testis;Urinary bladder	8
XXXXA_214123	CDH1	NA	NA	Esophagus;Gut;Kidney;Liver;Lung;Pancreas;Placenta;Prostate;Rectum	9
XXXXA_214658	CELA3A;CELA3B	NA	NA	Pancreas	1
XXXXA_215074	CFH	NA	NA	Heart;Monocytes;Pancreas	3
XXXXA_215082	CFH	NA	NA	Adrenal gland;Colon;Esophagus;Gall bladder;Gut;Heart;Kidney;Lung;Monocytes;Ovary;Pancreas;Platelets;Prostate;Rectum;Spinal cord;Testis;Urinary bladder	17
XXXXA_215087	CFHR2	NA	NA	Adrenal gland;Gall bladder;Liver;Ovary;Pancreas;Prostate;Testis;Urinary bladder	8
XXXXA_215092	CFHR1;CFHR3	NA	NA	Gall bladder	1
XXXXA_215165	CGREF1	NA	NA	Ovary;Pancreas	2
XXXXA_215877	CHI3L1	NA	NA	Lung;Ovary;Platelets;Prostate;Retina	5
XXXXA_215912	CHID1	NA	NA	Adrenal gland;B cells;Brain;CD4+ Tcells;CD8+ Tcells;Colon;Frontal cortex;Gut;Heart;Kidney;Liver;Lung;Monocytes;NK cells;Ovary;Pancreas;Placenta;Platelets;Prostate;Rectum;Retina;Spinal cord;Testis;Urinary bladder	24
XXXXA_215974	CHL1	NA	NA	Frontal cortex;Ovary;Pancreas;Prostate;Rectum;Retina;Spinal cord;Urinary bladder	8
XXXXA_216918	AKNAD1;CLCC1	NA	NA	Adrenal gland	1
XXXXA_216922	AKNAD1;CLCC1	NA	NA	Adrenal gland;B cells;Brain;CD8+ Tcells;Colon;Liver;Monocytes;Ovary;Prostate;Retina;Spinal cord;Testis;Urinary bladder	13
XXXXA_217080	CLEC18B	NA	NA	NK cells	1
XXXXA_217085	CLEC18C	NA	NA	Testis	1
XXXXA_217999	NA	NA	NA	Heart;Liver;Testis	3
XXXXA_218003	COL21A1	NA	NA	Gut	1
XXXXA_218668	CPA2	NA	NA	Pancreas	1
XXXXA_218729	CP	NA	NA	Adrenal gland;Brain;Colon;Esophagus;Frontal cortex;Gall bladder;Gut;Heart;Kidney;Liver;Lung;Monocytes;Ovary;Pancreas;Placenta;Platelets;Prostate;Rectum;Retina;Spinal cord;Testis;Urinary bladder	22
XXXXA_218743	CPM	NA	NA	Colon;Heart;Kidney;Lung;Monocytes;Ovary;Placenta;Prostate;Retina;Spinal cord;Testis	11
XXXXA_218942	CR1	NA	NA	B cells;CD8+ Tcells;Monocytes;NK cells	4
XXXXA_219136	CRISP2	NA	NA	Ovary	1
XXXXA_219215	CRTAC1	NA	NA	Frontal cortex;Monocytes;Prostate;Spinal cord	4
XXXXA_219221	CRTAP	NA	NA	Gut;Heart;Liver;Ovary;Placenta;Platelets;Testis	7
XXXXA_219592	CST1;CST4	NA	NA	Prostate	1
XXXXA_219889	CTRC	NA	NA	Pancreas	1
XXXXA_219891	CTRC	NA	NA	Gut	1
XXXXA_219902	CTSB	NA	NA	Placenta	1
XXXXA_219933	CTSE	NA	NA	Lung	1
XXXXA_219975	CTSV;GAS2L1P2	NA	NA	Testis	1
XXXXA_220195	CXADR	NA	NA	Testis	1
XXXXA_220211	CXCL12	NA	NA	Adrenal gland;Platelets	2
XXXXA_221546	DCN	NA	NA	Adrenal gland;Colon;Esophagus;Gall bladder;Gut;Heart;Kidney;Liver;Lung;Ovary;Pancreas;Placenta;Prostate;Rectum;Spinal cord;Testis;Urinary bladder	17
XXXXA_221549	DCN	NA	NA	Esophagus;Retina	2
XXXXA_221815	DDOST	NA	NA	Adrenal gland;B cells;Brain;CD4+ Tcells;CD8+ Tcells;Colon;Esophagus;Frontal cortex;Gut;Heart;Kidney;Liver;Lung;Monocytes;NK cells;Ovary;Pancreas;Placenta;Platelets;Prostate;Rectum;Retina;Spinal cord;Testis;Urinary bladder	25
XXXXA_223990	DNAJB9	NA	NA	Colon;Pancreas;Placenta;Retina	4
XXXXA_224753	DPEP2;DPEP3	NA	NA	Testis	1
XXXXA_225920	ECD;P4HA1	NA	NA	Adrenal gland;CD8+ Tcells;Rectum;Urinary bladder	4
XXXXA_225925	ECD;P4HA1	NA	NA	Brain;Gall bladder;Lung;Monocytes;NK cells	5
XXXXA_225926	ECD;P4HA1	NA	NA	Brain;Gall bladder;Kidney;Lung;Monocytes	5
XXXXA_227237	C1S;EMG1	NA	NA	Adrenal gland;Colon;Esophagus;Gall bladder;Gut;Liver;Lung;Monocytes;Ovary;Pancreas;Prostate;Rectum;Spinal cord;Testis;Urinary bladder	15
XXXXA_227430	ENG	NA	NA	Adrenal gland;Gall bladder;Gut;Heart;Kidney;Lung;Ovary;Pancreas;Placenta;Platelets;Prostate;Testis;Urinary bladder	13
XXXXA_227848	EPHB4	NA	NA	Rectum	1
XXXXA_227850	EPHB4	NA	NA	Gut	1
XXXXA_231061	FBN2	NA	NA	Kidney;Rectum	2
XXXXA_231456	FCGR1B	NA	NA	Monocytes;Spinal cord	2
XXXXA_231496	FCGRT	NA	NA	Liver	1
XXXXA_231497	FCGRT	NA	NA	Ovary;Testis	2
XXXXA_231555	FCN1	NA	NA	B cells;CD8+ Tcells;Monocytes;NK cells;Platelets	5
XXXXA_232072	FGB	NA	NA	CD8+ Tcells	1
XXXXA_232074	FGB	NA	NA	B cells;Brain	2
XXXXA_232226	FGG	NA	NA	Adrenal gland;B cells;Brain;CD8+ Tcells;Colon;Esophagus;Frontal cortex;Gall bladder;Gut;Heart;Kidney;Liver;Lung;Monocytes;NK cells;Ovary;Pancreas;Placenta;Platelets;Prostate;Rectum;Retina;Spinal cord;Testis;Urinary bladder	25
XXXXA_234123	NA	NA	NA	Kidney	1
XXXXA_234738	FSTL1	NA	NA	Gall bladder	1
XXXXA_234753	FSTL4	NA	NA	Heart	1
XXXXA_234868	FUCA2	NA	NA	Adrenal gland;Colon;Gall bladder;Gut;Heart;Kidney;Liver;Monocytes;Ovary;Pancreas;Prostate;Rectum;Testis	13
XXXXA_235667	GANAB	NA	NA	Adrenal gland;B cells;Brain;CD4+ Tcells;CD8+ Tcells;Colon;Frontal cortex;Gall bladder;Gut;Liver;Lung;Monocytes;NK cells;Ovary;Pancreas;Placenta;Platelets;Prostate;Rectum;Retina;Spinal cord;Testis;Urinary bladder	23
XXXXA_235670	GANAB	NA	NA	Adrenal gland;B cells;Brain;CD4+ Tcells;CD8+ Tcells;Colon;Esophagus;Frontal cortex;Gall bladder;Gut;Heart;Kidney;Liver;Lung;Monocytes;NK cells;Ovary;Pancreas;Placenta;Platelets;Prostate;Rectum;Retina;Spinal cord;Testis;Urinary bladder	26
XXXXA_236229	GC	NA	NA	Colon;Gall bladder;Rectum	3
XXXXA_236286	GDF10	NA	NA	Retina	1
XXXXA_236735	GGH	NA	NA	Adrenal gland;B cells;Brain;Colon;Frontal cortex;Monocytes;Pancreas;Placenta;Platelets;Prostate;Rectum;Retina;Urinary bladder	13
XXXXA_236737	GGH	NA	NA	Spinal cord	1
XXXXA_236822	CSH1;CSH2;CSHL1;GH1;GH2	NA	NA	Heart;Placenta	2
XXXXA_236827	CSH1;CSH2;CSHL1;GH1;GH2	NA	NA	Placenta	1
XXXXA_236838	CSH1;CSH2;CSHL1;GH1;GH2	NA	NA	Gut;Heart;Placenta	3
XXXXA_236843	CSH1;CSH2;CSHL1;GH1;GH2	NA	NA	Heart;Liver;Placenta	3
XXXXA_236850	CSH1;CSH2;CSHL1;GH1;GH2	NA	NA	Gut;Heart;Liver;Placenta	4
XXXXA_236858	GHDC	NA	NA	Adrenal gland;Kidney;Testis	3
XXXXA_236859	GHDC	NA	NA	Adrenal gland;B cells;CD8+ Tcells;Liver;Lung;Monocytes;NK cells;Ovary;Platelets;Prostate;Rectum;Retina;Spinal cord;Testis;Urinary bladder	15
XXXXA_238964	GP2	NA	NA	Pancreas	1
XXXXA_239351	ADGRG1	NA	NA	Brain;CD8+ Tcells;NK cells;Testis	4
XXXXA_239547	GPX7	NA	NA	Adrenal gland;B cells;Brain;CD8+ Tcells;Gut;Heart;Liver;Ovary;Pancreas;Placenta;Platelets;Retina;Testis	13
XXXXA_240614	GUSB	NA	NA	CD8+ Tcells;Kidney;Liver;Monocytes;NK cells;Rectum	6
XXXXA_240615	GUSB	NA	NA	Prostate	1
XXXXA_241738	HEPH	NA	NA	Colon;Gall bladder;Gut;Ovary;Prostate;Rectum;Spinal cord;Testis	8
XXXXA_242463	HLA-B;HLA-C	NA	NA	Spinal cord	1
XXXXA_242468	HLA-B;HLA-C	NA	NA	CD4+ Tcells;Colon;Lung;Monocytes;Pancreas;Placenta;Platelets;Prostate;Rectum;Testis;Urinary bladder	11
XXXXA_242507	HLA-DPB1	NA	NA	Adrenal gland;Kidney;Lung;Monocytes;NK cells;Pancreas;Platelets;Prostate	8
XXXXA_243511	HPX	NA	NA	Esophagus;Gall bladder;Lung;Monocytes;Ovary;Pancreas;Prostate;Rectum;Spinal cord;Testis;Urinary bladder	11
XXXXA_244276	ICA1	NA	NA	Pancreas	1
XXXXA_244842	IGHV3-22	NA	NA	Esophagus;Heart;Lung	3
XXXXA_244851	IGHV5-78	NA	NA	Placenta	1
XXXXA_244886	IGHV3-29;IGHV3-32;IGHV3-47;IGHV3-6;IGHV7-34-1	NA	NA	CD4+ Tcells	1
XXXXA_244908	IGK;IGKC;IGKV1-5	NA	NA	Adrenal gland;Colon;Gall bladder;Gut;Heart;Kidney;Lung;Ovary;Prostate;Rectum;Retina;Spinal cord;Testis;Urinary bladder	14
XXXXA_244925	BMS1P20;IGLC4;IGLV1-41;IGLV2-5;IGLV3-2;IGLV3-4;IGLV3-6;IGLV3-7	NA	NA	Colon;Testis	2
XXXXA_244926	BMS1P20;IGLC4;IGLV1-41;IGLV2-5;IGLV3-2;IGLV3-4;IGLV3-6;IGLV3-7	NA	NA	Colon	1
XXXXA_244932	BMS1P20;IGLC4;IGLV1-41;IGLV2-5;IGLV3-2;IGLV3-4;IGLV3-6;IGLV3-7	NA	NA	Brain;Frontal cortex;Monocytes;NK cells	4
XXXXA_245575	INHA	NA	NA	Adrenal gland	1
XXXXA_246547	ITGB7	NA	NA	B cells;NK cells	2
XXXXA_246783	IZUMO4	NA	NA	Testis	1
XXXXA_246793	IZUMO4	NA	NA	Testis	1
XXXXA_249361	EMC1	NA	NA	Brain;Ovary;Pancreas;Spinal cord;Testis	5
XXXXA_249365	EMC1	NA	NA	Pancreas;Testis	2
XXXXA_251576	NA	NA	NA	B cells	1
XXXXA_252602	POGLUT1	NA	NA	Adrenal gland;CD4+ Tcells	2
XXXXA_252603	POGLUT1	NA	NA	B cells;CD8+ Tcells;Retina;Testis	4
XXXXA_252748	NA	NA	NA	Placenta	1
XXXXA_253017	LAMA2	NA	NA	Placenta;Spinal cord	2
XXXXA_253103	LAMB3	NA	NA	Lung	1
XXXXA_253104	LAMB3	NA	NA	Prostate	1
XXXXA_253602	LCN2	NA	NA	Adrenal gland;B cells;Heart;Ovary;Placenta;Retina;Spinal cord;Testis;Urinary bladder	9
XXXXA_258337	LRPAP1	NA	NA	Adrenal gland;Brain;CD4+ Tcells;CD8+ Tcells;Frontal cortex;Gut;Heart;Lung;Monocytes;Placenta	10
XXXXA_259526	CD22;MAG	NA	NA	B cells	1
XXXXA_259840	MAN2B2	NA	NA	Colon;Spinal cord	2
XXXXA_259873	NA	NA	NA	CD8+ Tcells;Gut;Liver;NK cells;Pancreas;Prostate	6
XXXXA_261075	MCAM	NA	NA	Adrenal gland;Brain;Colon;Esophagus;Frontal cortex;Gall bladder;Gut;Heart;Kidney;Liver;Lung;Ovary;Pancreas;Placenta;Prostate;Rectum;Retina;Spinal cord;Testis;Urinary bladder	20
XXXXA_262054	MEP1A	NA	NA	Colon	1
XXXXA_262058	MEP1A	NA	NA	Gut;Rectum	2
XXXXA_262513	MFGE8	NA	NA	Colon;Esophagus;Heart;Kidney;Lung;Ovary;Placenta;Prostate;Retina;Spinal cord;Testis;Urinary bladder	12
XXXXA_262805	MIA3	NA	NA	Colon;Kidney;Monocytes	3
XXXXA_263611	MMP7	NA	NA	Kidney	1
XXXXA_265026	MST1	NA	NA	Liver;Monocytes;Testis	3
XXXXA_265510	MTTP	NA	NA	Brain;Colon;Gall bladder;Gut;Liver;Ovary;Prostate;Spinal cord;Testis;Urinary bladder	10
XXXXA_265603	KRTCAP2;MUC1	NA	NA	Colon	1
XXXXA_267361	NAPSB	NA	NA	Kidney;Lung	2
XXXXA_269299	NELL2	NA	NA	Brain	1
XXXXA_271816	NRP1	NA	NA	Kidney;Placenta	2
XXXXA_272211	NUCB1	NA	NA	Adrenal gland;B cells;CD4+ Tcells;CD8+ Tcells;Colon;Gall bladder;Heart;Kidney;Liver;Lung;Monocytes;Ovary;Pancreas;Prostate;Rectum;Retina;Spinal cord;Testis;Urinary bladder	19
XXXXA_272212	NUCB1	NA	NA	Brain;Frontal cortex;Gut;NK cells;Placenta;Platelets;Urinary bladder	7
XXXXA_272220	NUCB2	NA	NA	B cells;Brain;Gall bladder;Kidney;Lung;Placenta;Platelets	7
XXXXA_273320	OGN	NA	NA	Adrenal gland;Brain;Colon;Esophagus;Gall bladder;Gut;Heart;Kidney;Liver;Lung;Monocytes;Ovary;Pancreas;Placenta;Prostate;Rectum;Spinal cord;Testis;Urinary bladder	19
XXXXA_273360	OLFML3	NA	NA	Ovary;Prostate	2
XXXXA_273676	ORM1;ORM2	NA	NA	Colon;Monocytes;Pancreas;Prostate;Rectum;Spinal cord;Testis	7
XXXXA_273678	ORM1;ORM2	NA	NA	Adrenal gland;CD4+ Tcells;Colon;Esophagus;Gall bladder;Heart;Kidney;Liver;Lung;Monocytes;Ovary;Pancreas;Placenta;Prostate;Rectum;Retina;Spinal cord;Testis;Urinary bladder	19
XXXXA_274085	P4HTM;WDR6	NA	NA	Retina	1
XXXXA_274461	CNPY2;CS;PAN2	NA	NA	Brain;Gall bladder;Gut;Kidney;Liver;Lung;Ovary;Placenta;Retina;Testis	10
XXXXA_274475	CNPY2;CS;PAN2	NA	NA	Adrenal gland;Brain;CD4+ Tcells;Esophagus;Frontal cortex;Gall bladder;Gut;Heart;Kidney;Liver;Lung;Monocytes;Ovary;Placenta;Platelets;Rectum;Retina;Testis	18
XXXXA_276056	PDIA5;SEC22A	NA	NA	Brain;Gall bladder;Urinary bladder	3
XXXXA_276367	PEBP4	NA	NA	Prostate	1
XXXXA_277091	PGLYRP2	NA	NA	Pancreas;Rectum	2
XXXXA_277593	PI16	NA	NA	Spinal cord	1
XXXXA_277594	PI16	NA	NA	Colon;Esophagus;Frontal cortex;Gall bladder;Ovary;Pancreas;Prostate;Rectum;Spinal cord;Testis;Urinary bladder	11
XXXXA_277826	PIGT	NA	NA	Ovary	1
XXXXA_277830	PIGT	NA	NA	Monocytes	1
XXXXA_277853	PIGU	NA	NA	Adrenal gland;B cells;Brain;CD4+ Tcells;CD8+ Tcells;Colon;Frontal cortex;Gut;Heart;Liver;Monocytes;NK cells;Ovary;Retina;Testis	15
XXXXA_278465	PLA2G15	NA	NA	Adrenal gland	1
XXXXA_278469	PLA2G15	NA	NA	Placenta	1
XXXXA_279607	PLOD1	NA	NA	Monocytes;Pancreas;Rectum	3
XXXXA_279618	PLOD1	NA	NA	Placenta	1
XXXXA_279622	PLOD3	NA	NA	CD8+ Tcells	1
XXXXA_279920	PLTP	NA	NA	Adrenal gland;Colon;Esophagus;Gall bladder;Gut;Heart;Kidney;Lung;Monocytes;Ovary;Pancreas;Prostate;Rectum;Retina;Spinal cord;Urinary bladder	16
XXXXA_280441	PNLIP	NA	NA	CD4+ Tcells;Gall bladder;Pancreas	3
XXXXA_280623	PODXL2	NA	NA	Brain	1
XXXXA_280652	POFUT2	NA	NA	Adrenal gland;Heart;Liver;Ovary;Testis	5
XXXXA_283034	PRKCSH	NA	NA	Brain;Esophagus;Heart;Lung;Urinary bladder	5
XXXXA_283036	PRKCSH	NA	NA	Adrenal gland;B cells;Brain;CD4+ Tcells;CD8+ Tcells;Gut;Heart;Kidney;Liver;Lung;Monocytes;NK cells;Pancreas;Platelets;Prostate;Rectum;Retina;Spinal cord;Testis;Urinary bladder	20
XXXXA_283708	PSAP	NA	NA	Adrenal gland;B cells;Brain;Colon;Frontal cortex;Gut;Heart;Lung;Ovary;Placenta;Retina;Spinal cord;Urinary bladder	13
XXXXA_283709	PSAP	NA	NA	CD4+ Tcells	1
XXXXA_284400	LCNL1;PTGDS	NA	NA	Testis	1
XXXXA_284405	LCNL1;PTGDS	NA	NA	Heart;Retina;Spinal cord;Testis	4
XXXXA_284406	LCNL1;PTGDS	NA	NA	Esophagus;Rectum	2
XXXXA_285201	PVRL4	NA	NA	Esophagus;Prostate	2
XXXXA_285252	PXDN	NA	NA	Colon;Gut;Heart;Liver;Lung;Ovary;Placenta;Prostate;Rectum;Testis;Urinary bladder	11
XXXXA_285521	QPCT	NA	NA	Pancreas;Prostate	2
XXXXA_285527	QPCT	NA	NA	Frontal cortex;Testis	2
XXXXA_285558	FLJ23867;QSOX1	NA	NA	Gall bladder;Lung;Prostate;Rectum;Testis;Urinary bladder	6
XXXXA_285560	FLJ23867;QSOX1	NA	NA	Monocytes	1
XXXXA_285564	FLJ23867;QSOX1	NA	NA	Colon;Gut;Monocytes;Ovary;Prostate;Testis;Urinary bladder	7
XXXXA_286823	RARRES2	NA	NA	Adrenal gland;Colon;Gall bladder;Kidney;Ovary;Pancreas;Placenta;Platelets;Prostate;Testis;Urinary bladder	11
XXXXA_287765	RCN3	NA	NA	Gall bladder;Gut;Heart;Liver;Lung;Ovary;Pancreas;Placenta;Prostate;Rectum;Spinal cord;Testis;Urinary bladder	13
XXXXA_288236	RETSAT	NA	NA	Adrenal gland;Colon;Kidney;Liver;Lung;Ovary;Retina;Testis	8
XXXXA_288238	RETSAT	NA	NA	Adrenal gland;Colon;Gall bladder;Gut;Kidney;Liver;Ovary;Rectum;Retina;Testis	10
XXXXA_290180	NA	NA	NA	Brain;NK cells;Urinary bladder	3
XXXXA_292339	NA	NA	NA	Esophagus;Kidney	2
XXXXA_293490	SCARF1	NA	NA	Lung	1
XXXXA_293535	SCG5	NA	NA	Frontal cortex;Pancreas	2
XXXXA_293781	NAAA;SDAD1	NA	NA	Prostate	1
XXXXA_295050	SERPINA7	NA	NA	Gut;Kidney;Placenta;Rectum	4
XXXXA_295146	SERPING1	NA	NA	Brain	1
XXXXA_295149	SERPING1	NA	NA	Gall bladder;Ovary;Pancreas;Prostate;Testis;Urinary bladder	6
XXXXA_295152	SERPINH1	NA	NA	Ovary	1
XXXXA_295693	SFTPA1	NA	NA	Lung	1
XXXXA_295701	SFTPB	NA	NA	Lung	1
XXXXA_297341	SIDT2	NA	NA	Pancreas;Testis	2
XXXXA_297598	SIRPA	NA	NA	Gall bladder;Pancreas	2
XXXXA_297599	SIRPA	NA	NA	CD8+ Tcells;Gall bladder;Monocytes;Ovary;Retina	5
XXXXA_297600	SIRPA	NA	NA	Monocytes	1
XXXXA_297604	SIRPB1;SIRPD	NA	NA	Monocytes	1
XXXXA_297606	SIRPB1;SIRPD	NA	NA	Monocytes	1
XXXXA_297615	NSFL1C;SIRPB2	NA	NA	Monocytes	1
XXXXA_302693	SMPDL3B	NA	NA	Pancreas	1
XXXXA_302695	SMPDL3B	NA	NA	Gut;Kidney;Ovary	3
XXXXA_305083	SPARCL1	NA	NA	Adrenal gland	1
XXXXA_305788	SPINT1	NA	NA	Pancreas;Placenta;Prostate	3
XXXXA_306138	SPP1	NA	NA	Frontal cortex	1
XXXXA_306593	SRGN	NA	NA	CD8+ Tcells;Colon;Liver;Monocytes;Platelets;Prostate	6
XXXXA_306940	SSR4	NA	NA	Adrenal gland;B cells;CD4+ Tcells;CD8+ Tcells;Colon;Frontal cortex;Gall bladder;Gut;Heart;Kidney;Liver;Lung;Monocytes;NK cells;Ovary;Pancreas;Platelets;Prostate;Retina;Spinal cord;Testis;Urinary bladder	22
XXXXA_307619	NA	NA	NA	Colon	1
XXXXA_309156	SUMF1	NA	NA	Gut;Liver;Monocytes;Ovary;Placenta;Platelets;Prostate;Testis	8
XXXXA_309157	SUMF1	NA	NA	Monocytes;Ovary	2
XXXXA_310399	SYCN	NA	NA	Pancreas	1
XXXXA_311283	TAPBP	NA	NA	Colon;Ovary	2
XXXXA_311938	TBC1D8	NA	NA	Testis	1
XXXXA_313528	THBS2	NA	NA	Pancreas	1
XXXXA_313564	TH	NA	NA	Gall bladder;Retina;Spinal cord;Urinary bladder	4
XXXXA_313666	THSD4	NA	NA	Gall bladder;Heart	2
XXXXA_314457	TMED10	NA	NA	Adrenal gland;B cells;Brain;CD4+ Tcells;CD8+ Tcells;Colon;Esophagus;Frontal cortex;Gut;Heart;Kidney;Lung;Monocytes;NK cells;Pancreas;Placenta;Platelets;Prostate;Rectum;Retina;Spinal cord;Urinary bladder	22
XXXXA_314470	TMED2	NA	NA	B cells;Esophagus;Gall bladder;Heart;Kidney;Rectum;Spinal cord	7
XXXXA_314472	TMED2	NA	NA	Placenta	1
XXXXA_315422	TMEM63A	NA	NA	CD8+ Tcells;Liver	2
XXXXA_315754	TNC	NA	NA	Placenta	1
XXXXA_315755	TNC	NA	NA	Adrenal gland;Esophagus;Heart;Kidney;Placenta	5
XXXXA_315756	TNC	NA	NA	Ovary;Placenta;Retina;Testis	4
XXXXA_316434	NA	NA	NA	Colon;Rectum	2
XXXXA_317010	TPSAB1	NA	NA	Colon;Esophagus;Gall bladder;Heart;Kidney;Liver;Lung;Ovary;Pancreas;Prostate;Rectum;Spinal cord;Testis;Urinary bladder	14
XXXXA_317412	TREH	NA	NA	Kidney	1
XXXXA_318496	TSPAN7	NA	NA	Adrenal gland;Colon;Frontal cortex;Liver;Pancreas;Prostate;Rectum;Retina;Spinal cord	9
XXXXA_318571	F11R;TSTD1	NA	NA	CD4+ Tcells;CD8+ Tcells;Esophagus;Gall bladder;Gut;Kidney;Liver;Lung;Monocytes;Ovary;Placenta;Platelets;Rectum;Testis	14
XXXXA_319020	TTR	NA	NA	Gall bladder;Ovary;Testis	3
XXXXA_319039	TTYH1	NA	NA	Brain;Frontal cortex;Retina;Spinal cord	4
XXXXA_330109	ZPBP2	NA	NA	Ovary;Testis	2
